# Supplementary material
Source: PubMed Central journal article supplement (PMC3005028)
Supplement: NIHMS255546-supplement-Supplemental_data.pdf [file NIHMS255546-supplement-Supplemental_data.pdf]

Figure S1

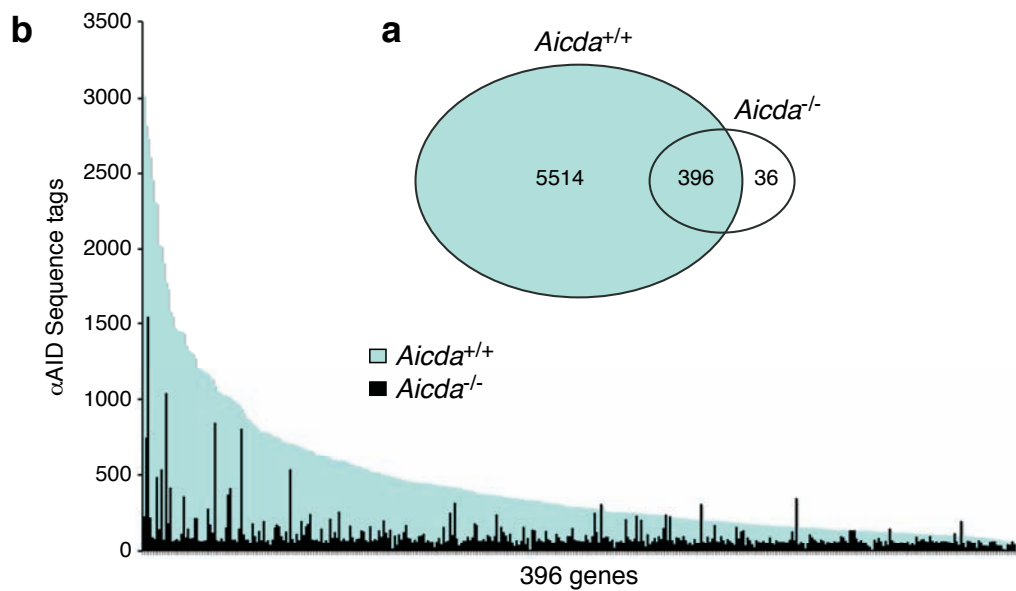

**Fig. S1 (a)** Venn diagram showing the total number of genes that display AID-specific (*Aicda*<sup>+/+</sup>) and non-specific (*Aicda*<sup>-/-</sup>) sequence tags upon AID immunoprecipitation. **(b)** Total sequence tags at each of the 396 overlapping genes shown in **a** obtained from *Aicda*<sup>+/+</sup> (cyan) or *Aicda*<sup>-/-</sup> (black) lymphocytes upon AID-Seq.

Figure S2

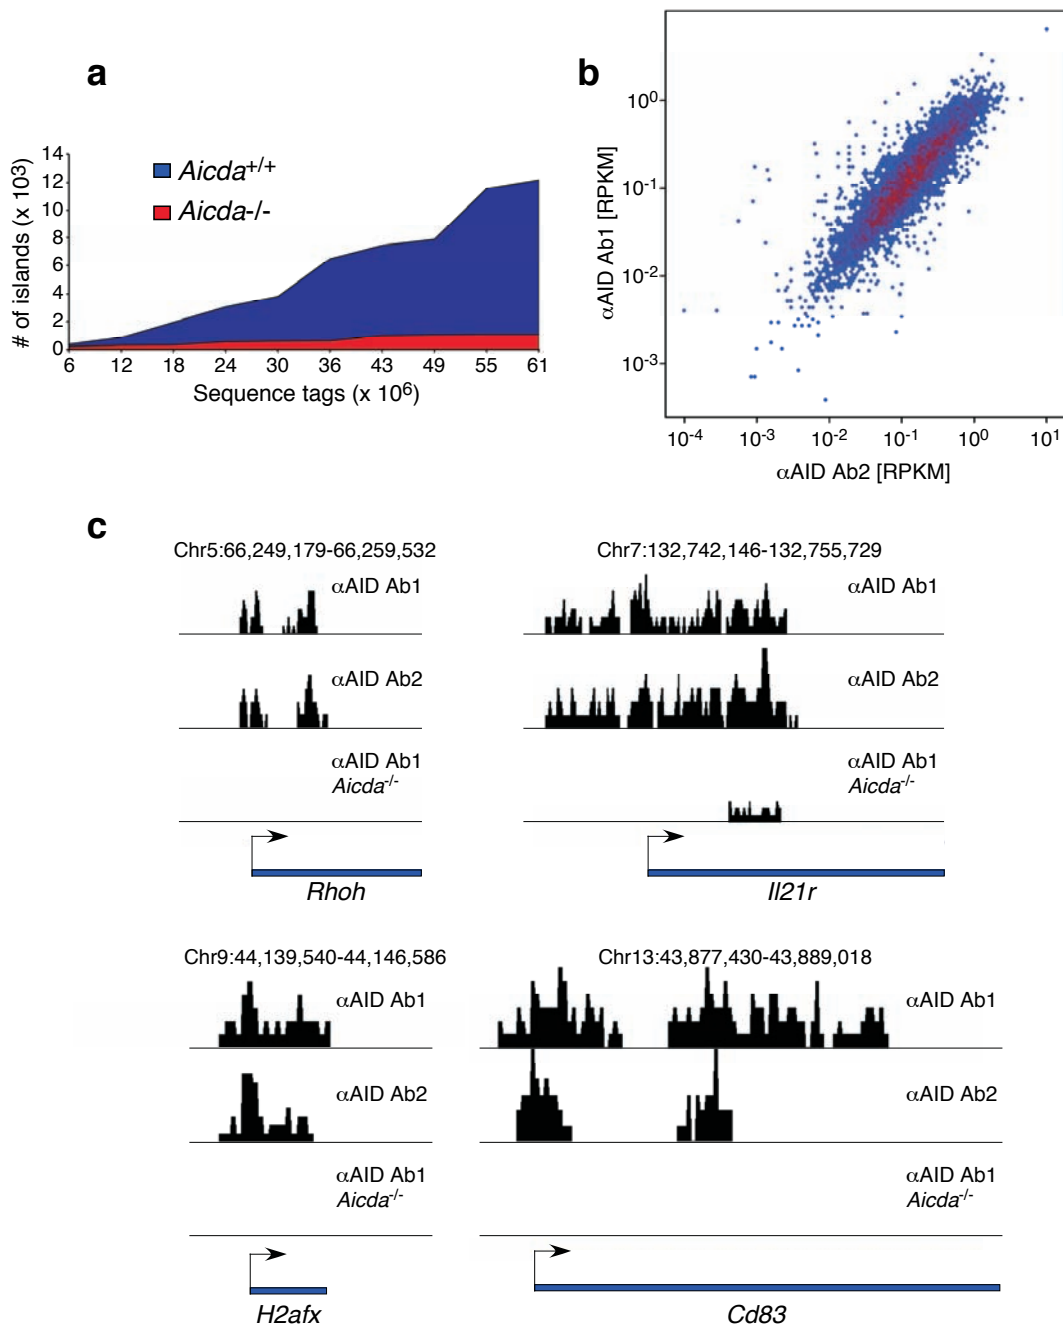

**Fig. S2: Validation of AID-Seq** (a) Saturation analysis of *Aicda*<sup>+/+</sup> and *Aicda*<sup>-/-</sup> microsequencing data divided into random subsets. For each dataset, the number of islands is plotted as a function of the total number of sequence tags (see methods). (b) Comparison of AID-Seq using antibodies Ab1 and Ab2. For each gene the total number of sequence tags per million per kb (RPKM) was plotted.  $\chi^2 = 5523$ ,  $P < 0.0005$ . (c) Examples of AID immunoprecipitation at known AID targets using the two  $\alpha$ AID antibodies. Antibody Ab1 was used in all experiments throughout the text.

Figure S3

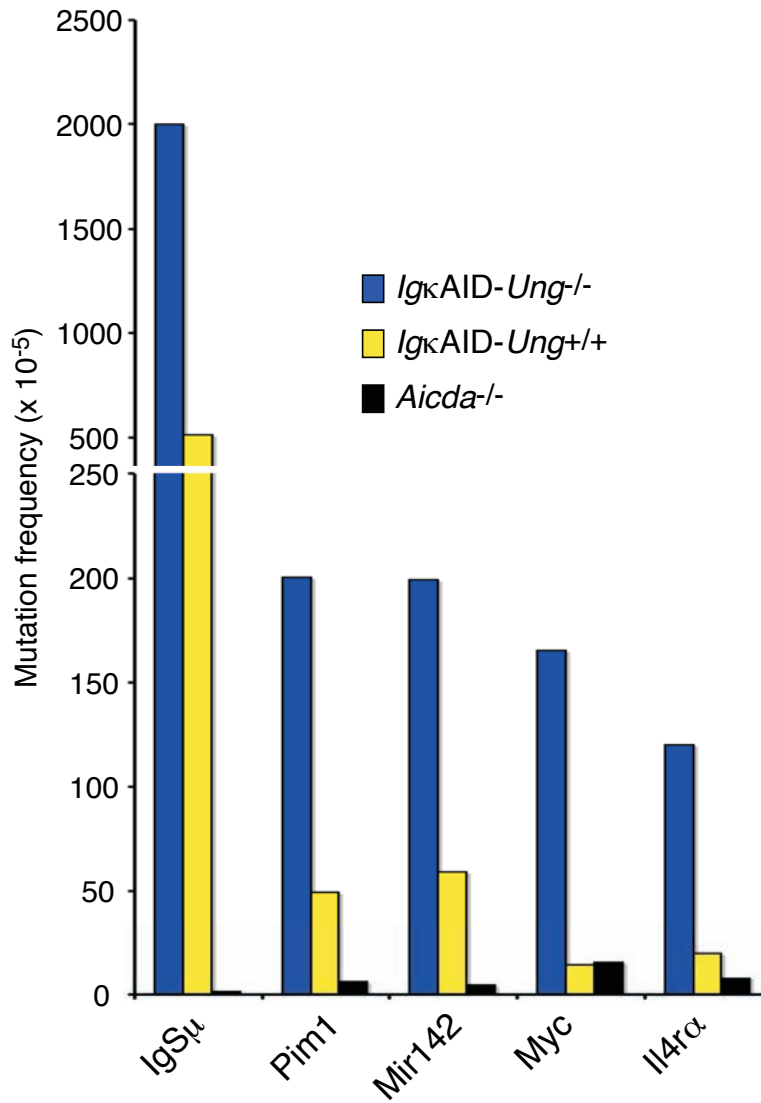

**Fig. S3:** Comparison of AID-mediated hypermutation at selected genes in *IgκAID* B lymphocytes in the presence or absence of UNG. Hypermutation in *Aicda*<sup>-/-</sup> cells is also provided as control for unspecific mutations. *IgκAID-UNG*<sup>+/+</sup> data for *IgS $\mu$* , *Myc*, and *Mir142* genes were previously reported<sup>9</sup>.

Figure S4

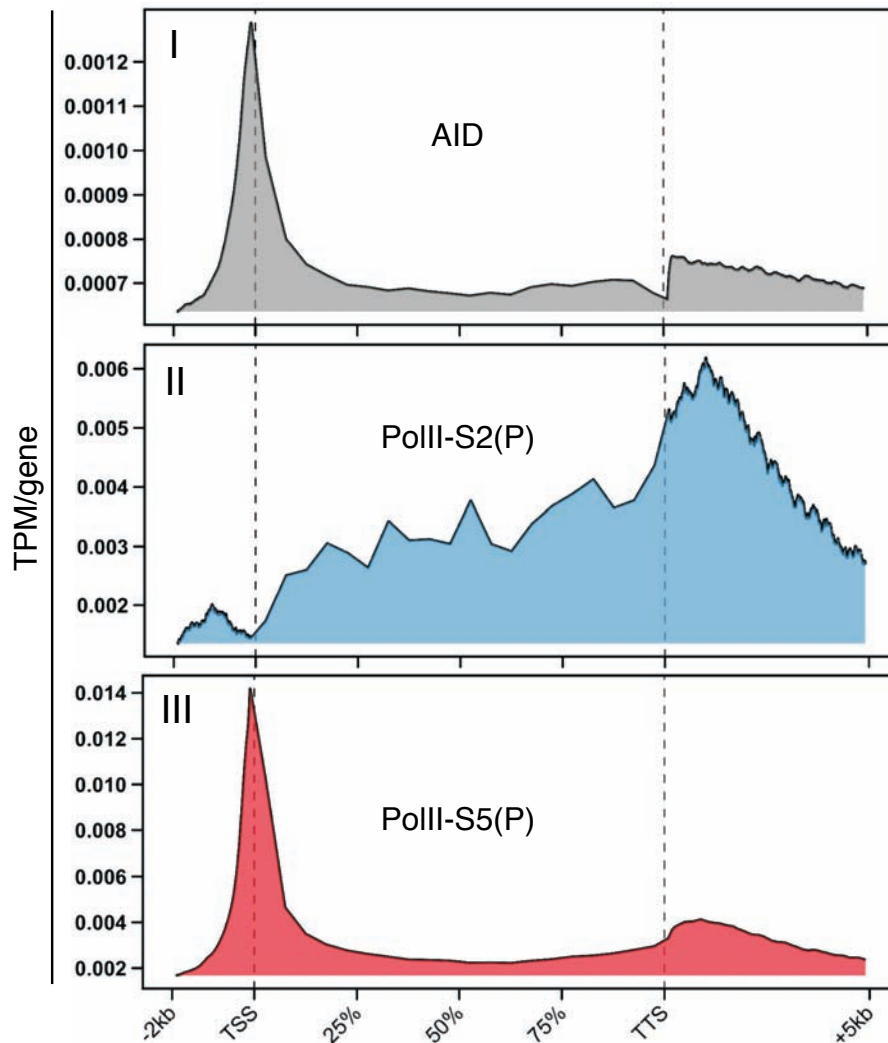

**Fig. S4. AID recruitment correlates with sites of PolII stalling and initiation.** Composite profiles of AID (panel I), as well as serine 2 (panel II) and serine 5 (panel III) phosphorylated forms of Pol II were obtained by ChIP-Seq analysis of LPS+IL-4 activated B cell samples. Upon recruitment to gene promoters, RNA PolII is phosphorylated within its C-terminal heptameric repeat (YSPTSPS) at positions 2 and 5. As expected<sup>38</sup>, S5P correlates with sites of transcriptional pausing and initiation, whereas S2P is largely associated with transcriptional elongation and termination.

Figure S5

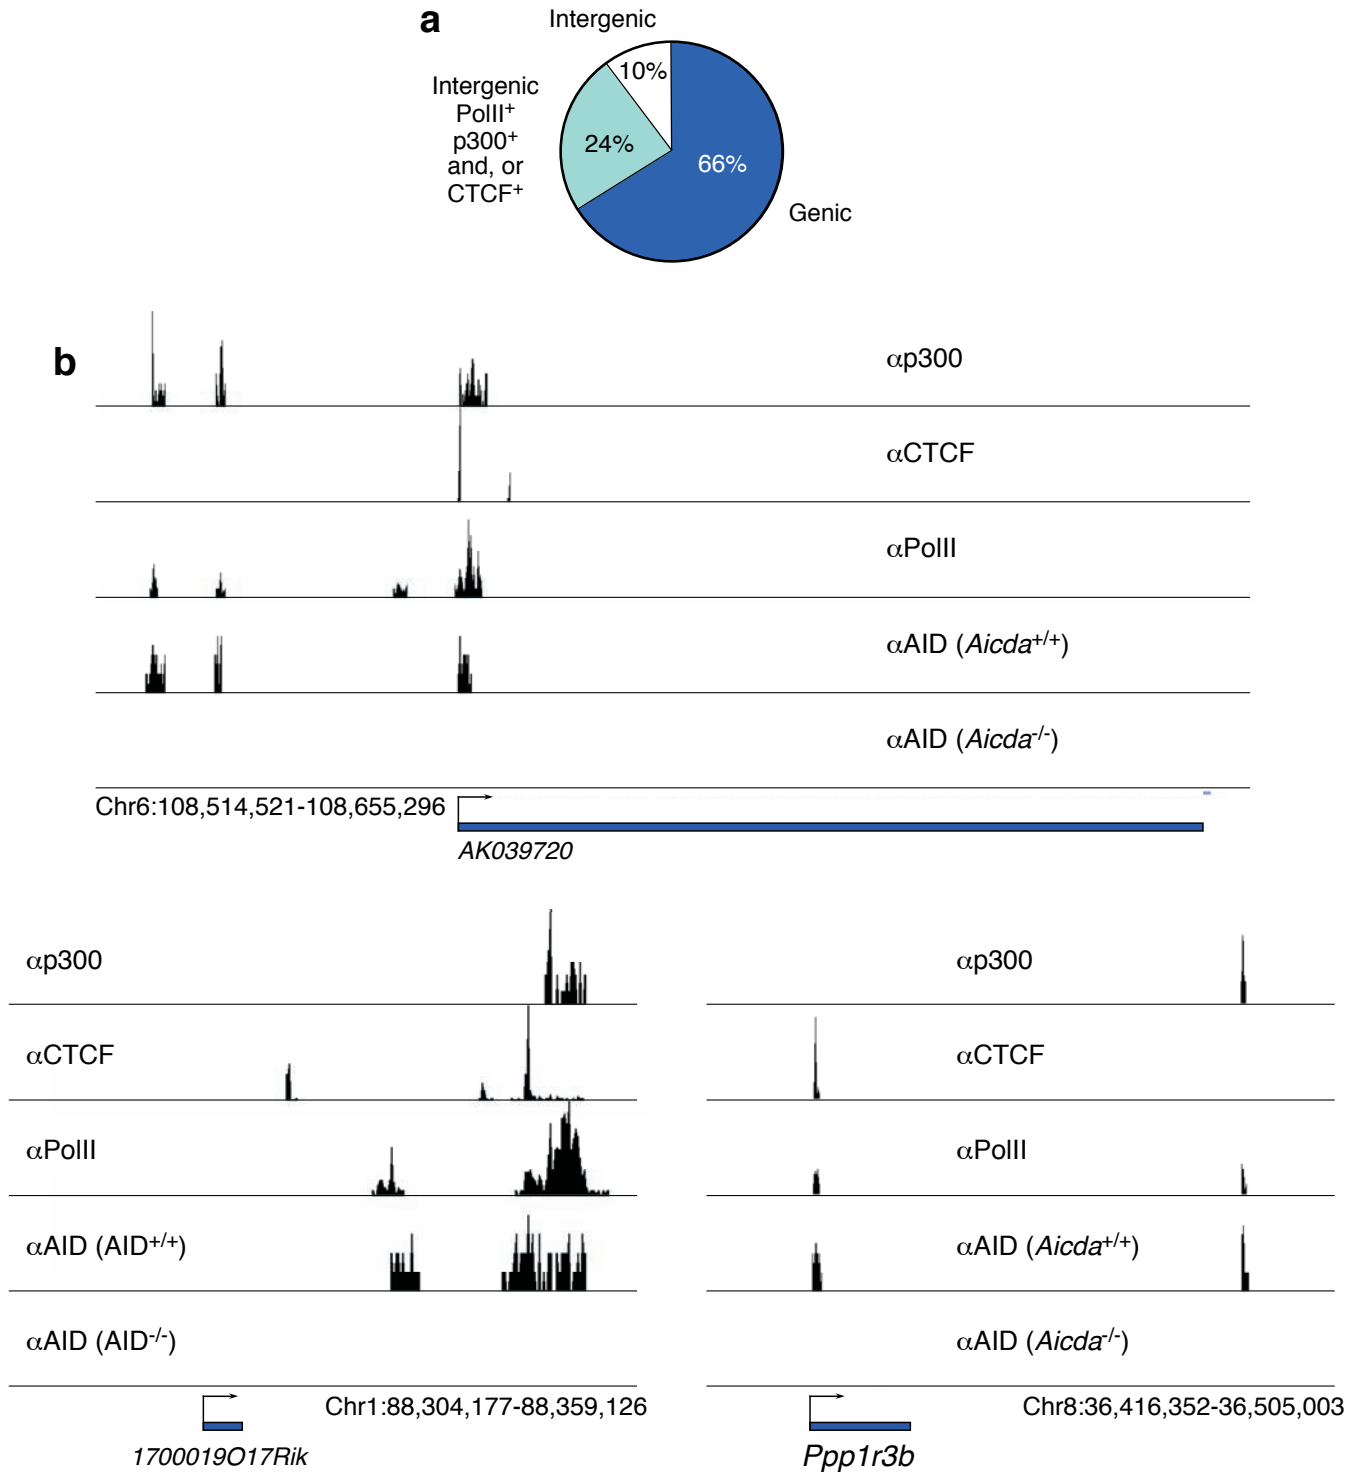

**Fig. S5:** (a) Pie chart representing the percentage of AID islands that fall within genic and intergenic domains in the B cell genome. A subset of AID intergenic islands overlaps with either PolIII, p300, and/or CTCF. (b) Examples of AID intergenic sites that overlap with PolIII, p300, and/or CTCF islands.

Figure S6

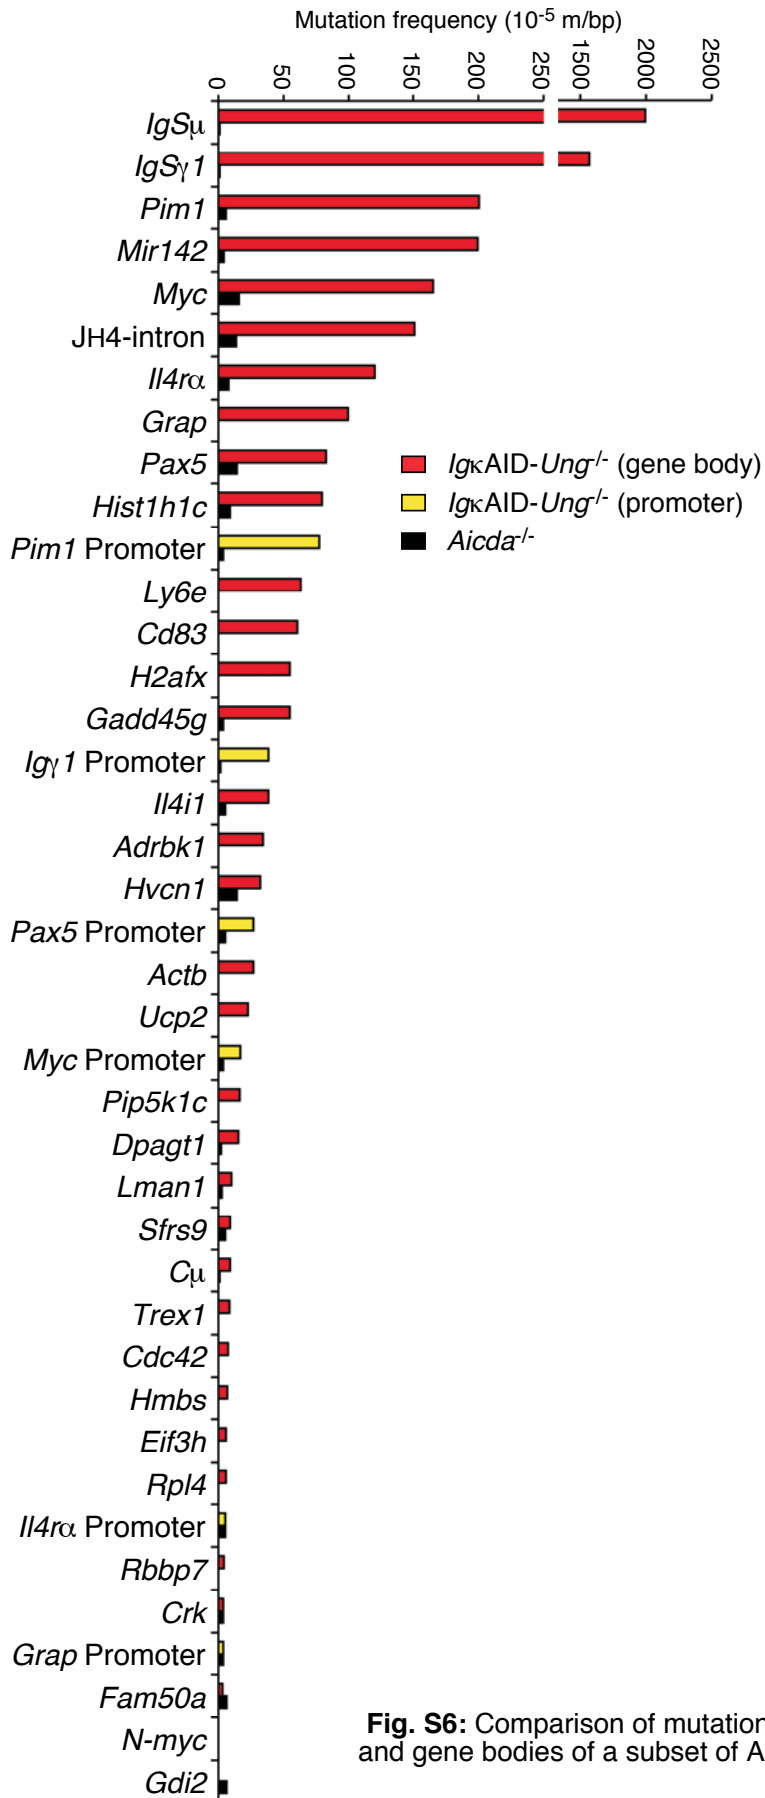

Fig. S6: Comparison of mutation frequency at promoters and gene bodies of a subset of AID on- and off-targets.

**Figure S7**

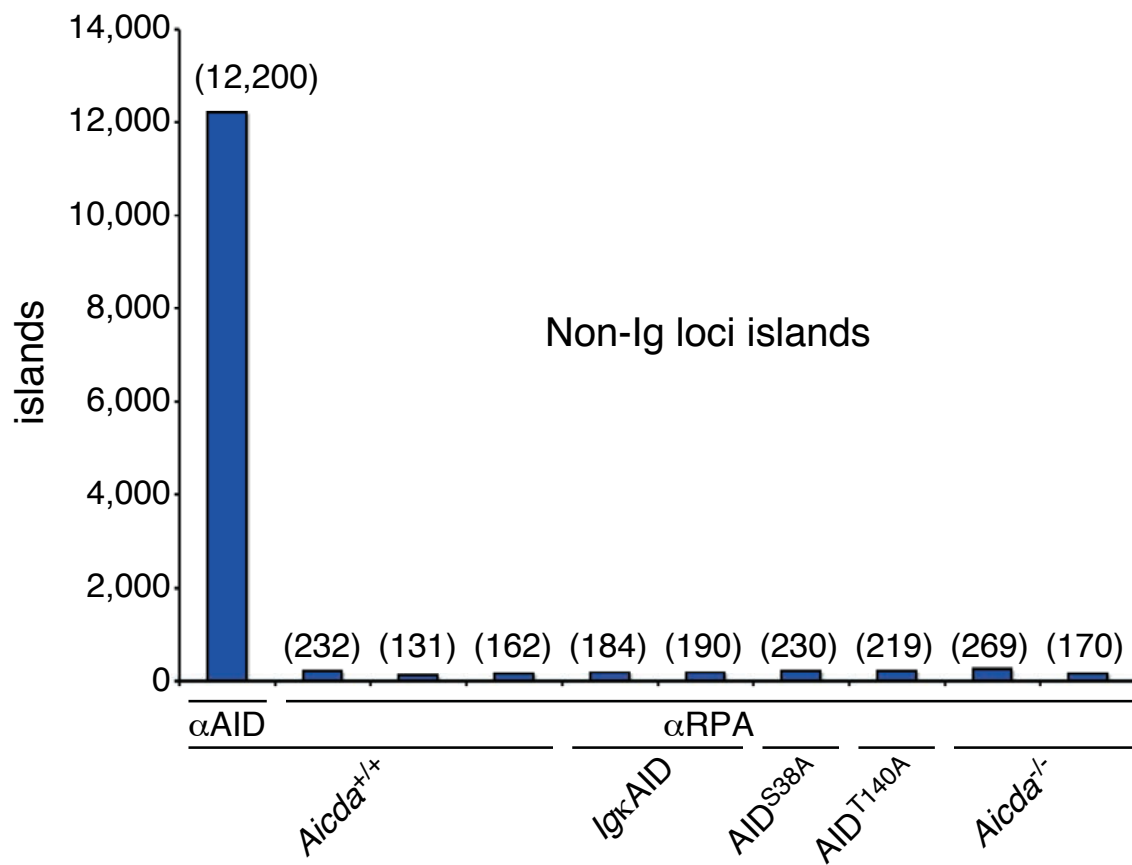

**Fig. S7:** Total number of non-Ig gene loci islands observed in AID- and RPA-Seq experiments.

Figure S8

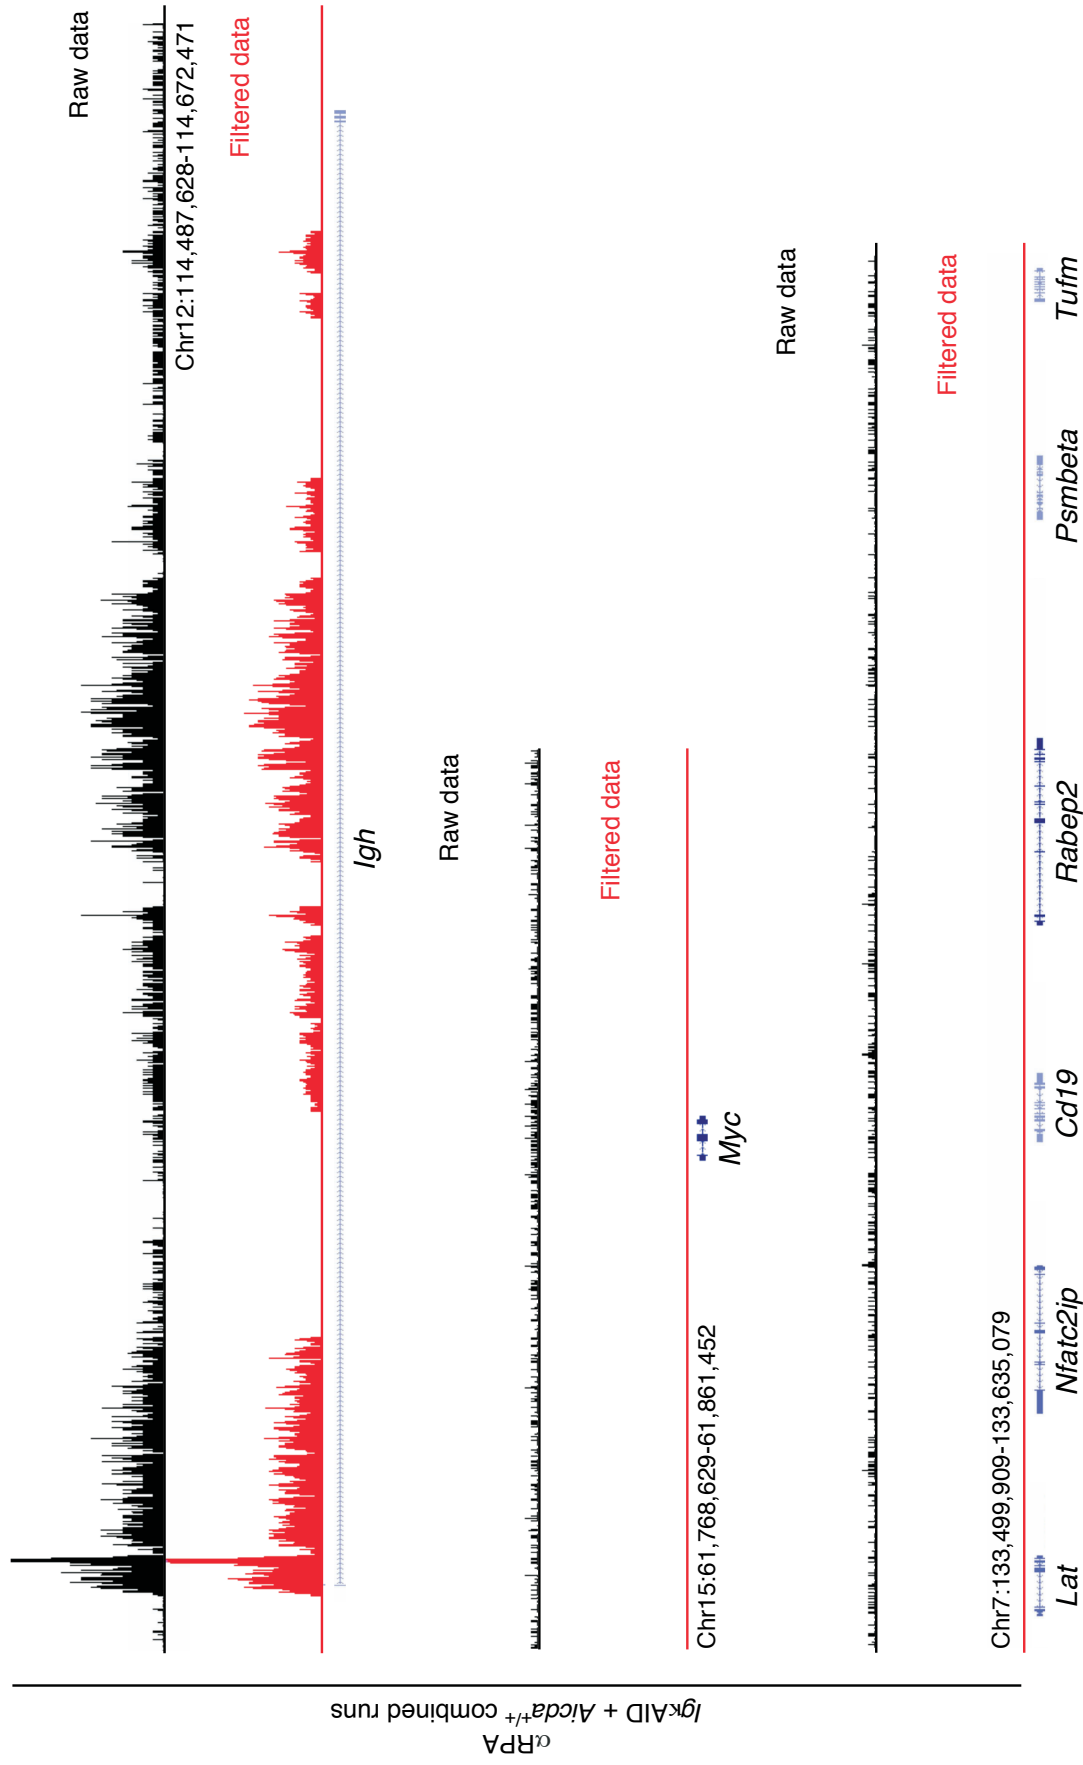

**Fig. S8:** RPA-Seq at *Igh*, *Myc*, and *Cd19* loci. Data from 2 *IgkAID* and 3 *Aicda*<sup>+/+</sup> samples was combined to ensure high sequencing saturation (see **Supplementary Table 5**). Both the unfiltered raw (black) and filtered (red) data using the Peak-Finder algorithm are shown.



**Figure S9**

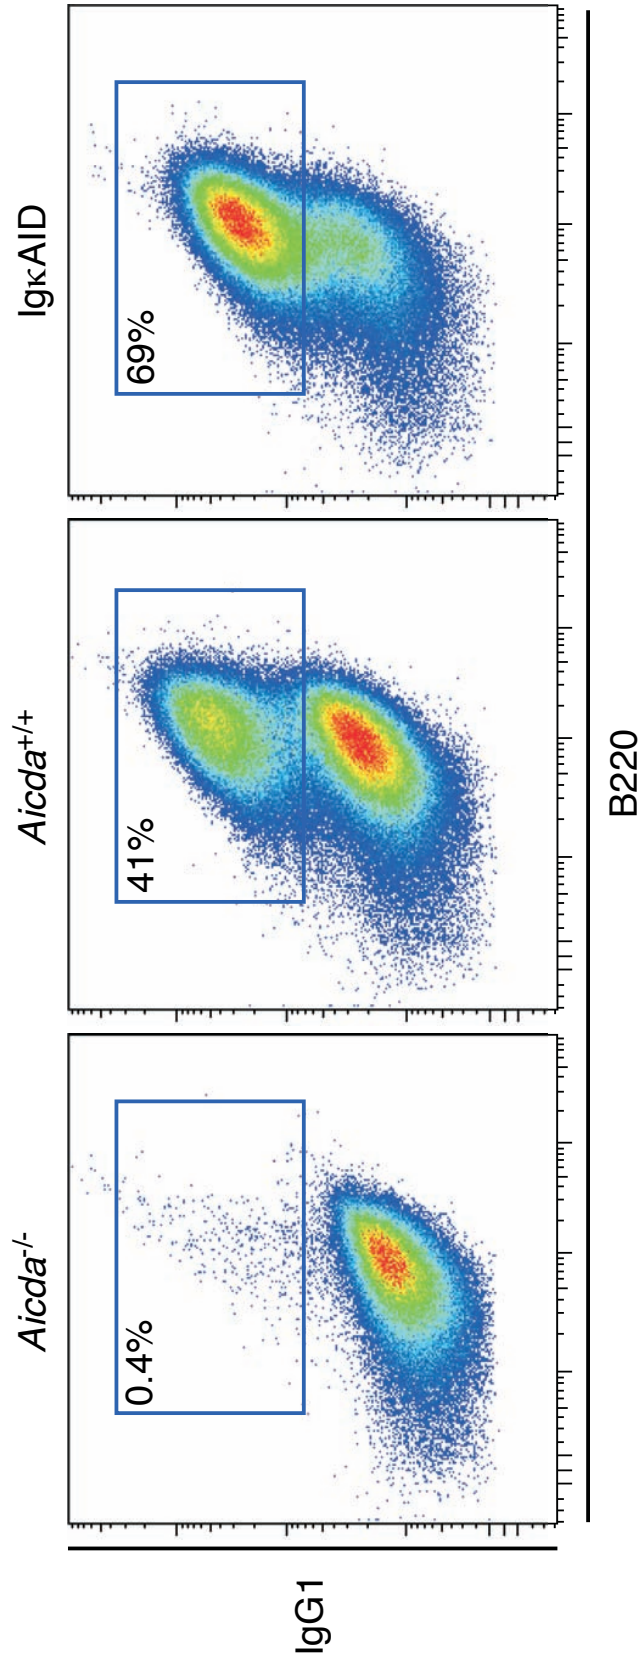

**Fig S9.** Flow cytometry analysis of CSR to IgG1 in *Aicda*<sup>-/-</sup>, *Aicda*<sup>+/+</sup>, and *IgkAID* B cells activated in the presence of LPS + IL-4 for 72 hs.

## Supplementary Fig. 10

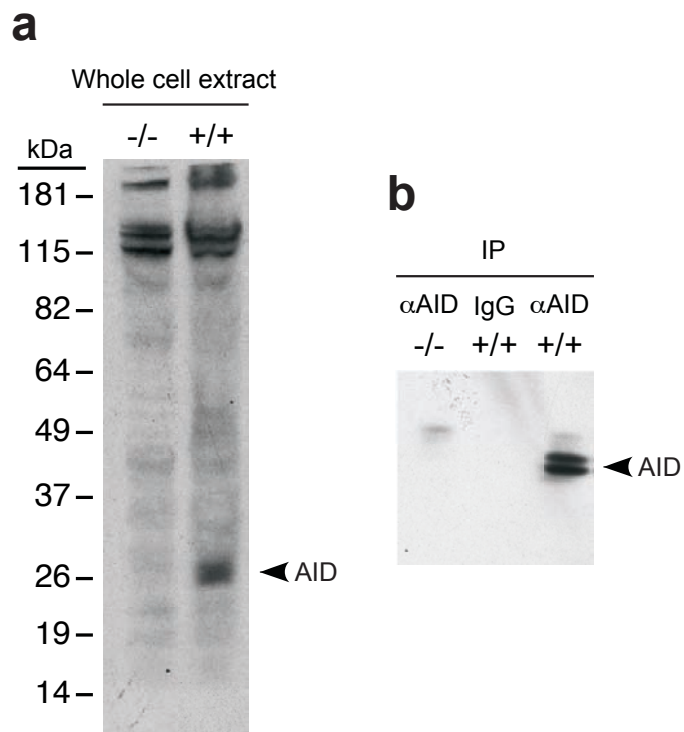

**Fig. S9 (a)** Specificity of anti-AID antibody 1 was confirmed by immunoblotting using whole cell extracts from *Aicda*<sup>-/-</sup> or *Aicda*<sup>+/+</sup>. 10% Nupage was run with MOPS buffer and Invitrogen's Benchmark was used as marker. **(b)** α-AID immunoblots of AID purified from wild-type (+/+) or AID knock-out (-/-) cells by immunoprecipitation with anti-AID (lanes 1 and 3) or IgG control (lane 2) antibodies.

## Supplementary text

### **Sonication-hypersensitive chromatin in ChIP-Seq samples**

---

There are several reports in the literature describing the presence of sonication-hypersensitive chromatin as revealed by ChIP studies. During the ChIP-Seq protocol DNA is sonicated to produce fragments of approximately 150 bp in length, which are isolated for further processing using agarose gels. When the protein of interest is bound to or associated with specific genomic sites, then it follows that DNA from such sites is preferentially enriched in the immunoprecipitate. Low levels of contaminating DNA fragments from across the entire genome are also invariably present. Following massive parallel sequencing and genomic alignment, enriched domains appear as islands surrounded by a sea of sequence tags originating from the contaminating DNA. If chromatin fragmentation were to be uniform (i.e. it would follow a random Poisson distribution), deep-sequencing of the immunoprecipitate from KO cells would be expected to only result in background signal, with no islands of enriched DNA. This is however not the case because some genomic sites display hypersensitivity to mechanical shearing of DNA. These sequences are thus overrepresented in the 150 bp band in the agarose gel and appear as false positive islands. It is important to point out however that in KO samples this background is not outcompeted by true signal, whereas this is certainly the case in WT cells. Thus, the contribution of either signal in islands shared between WT and MT samples cannot be accurately determined. For this reason, background KO signals were not “subtracted” from WT, but were included in **Supplementary Table 1**.

The nature of chromatin hypersensitivity to sonication is not entirely clear. The fact that some of these domains display DNaseI hypersensitivity (our unpublished observations) suggests that the presence of high-molecular-weight protein complexes at the site might play a role.

**Table S1:** Comparative analysis of AID, PolII, and mRNA from LPS+IL4 activated B cells  
 Values are either total sequence tags, sequence tags per million sequences (TPM), or sequence tags per million sequences per kilobase (Gene length was defined as -1Kb (from TSS) to TTS  
 Data is sorted based on the total  $\alpha$ AID sequence tags  
 Unclassified = genes too short to classify as either elongating or stalled  
 ND = not determined

| Gene        | $\alpha$ AID Total Tags (AID+/+) | $\alpha$ AID Total Tags (AID-/-) | $\alpha$ AID TPM (AID+/+) | $\alpha$ PolII Total Tags | $\alpha$ PolII TPM | mRNA RPKM | Stalling index | Stalling class | Location                  | Gene length (Kb) |
|-------------|----------------------------------|----------------------------------|---------------------------|---------------------------|--------------------|-----------|----------------|----------------|---------------------------|------------------|
| Igk         | 3426                             | 1538                             | 57.10167                  | 7589                      | 126.4833           | ND        | 0.685839       | Elongating     | chr12:114656706-114667494 | 8.788            |
| Hivep3      | 3409                             | 0                                | 56.81939                  | 4566                      | 76.1               | 5.97026   | 1.570621       | Elongating     | chr4:119485282-119808016  | 320.735          |
| Ppp1r16b    | 3018                             | 227                              | 50.30241                  | 10565                     | 176.0833           | 22.8748   | 3.416629       | Stalled        | chr2:158490870-158592069  | 99.2             |
| Vav2        | 2851                             | 0                                | 47.51894                  | 7652                      | 127.5333           | 24.3025   | 2.719047       | Elongating     | chr2:27119154-27284345    | 163.192          |
| St6gal1     | 2820                             | 747                              | 47.00225                  | 9259                      | 154.3167           | 58.2934   | 2.020183       | Elongating     | chr16:23222834-23360420   | 135.587          |
| gas5        | 2614                             | 218                              | 43.56875                  | 6869                      | 114.4833           | 12.0827   | 6.213705       | Stalled        | chr14:122275827-122420257 | 142.431          |
| Zmiz1       | 2582                             | 0                                | 43.0354                   | 4214                      | 70.23333           | 15.4881   | 2.035668       | Elongating     | chr14:26276777-26484195   | 205.419          |
| Rapgef1     | 2477                             | 0                                | 41.28531                  | 5159                      | 85.98333           | 52.8731   | 1.949263       | Elongating     | chr2:29473239-29595883    | 120.645          |
| Cyth1       | 2463                             | 87                               | 41.05197                  | 6198                      | 103.3              | 41.2751   | 2.935254       | Elongating     | chr11:118025479-118111906 | 84.428           |
| Sorcs2      | 2347                             | 0                                | 39.11854                  | 1874                      | 31.23333           | 0.743506  | 2.191467       | Stalled        | chr5:36359829-36742788    | 380.96           |
| Il4ra       | 2303                             | 74                               | 38.38517                  | 12346                     | 205.7667           | 132.919   | 1.797475       | Elongating     | chr7:132693795-132722988  | 27.194           |
| mmu-mir-142 | 2298                             | 481                              | 38.30184                  | 7675                      | 127.9167           | ND        | ND             | Stalled        | chr11:87561097-87573808   | 12.712           |
| PAX5        | 2185                             | 0                                | 36.41841                  | 14176                     | 236.2667           | 54.0135   | 2.875946       | Elongating     | chr4:44544377-44725312    | 178.936          |
| Ciita       | 2021                             | 140                              | 33.68495                  | 6215                      | 103.5833           | 42.9912   | 1.830687       | Elongating     | chr16:10486371-10527657   | 39.287           |
| Sp110       | 2020                             | 532                              | 33.66828                  | 1134                      | 18.9               | 45.0276   | 1.613368       | Elongating     | chr1:87473474-87502466    | 26.993           |
| Ksr1        | 2005                             | 0                                | 33.41827                  | 1801                      | 30.01667           | 5.97835   | 11.01727       | Stalled        | chr11:78828302-78961856   | 131.555          |
| Igy1        | 1963                             | 109                              | 32.71833                  | 5115                      | 85.25              | ND        | 0.237161       | Elongating     | chr12:114563457-114579593 | 8.788            |
| Pik3ap1     | 1908                             | 71                               | 31.80152                  | 7275                      | 121.25             | 60.2642   | 2.5586         | Elongating     | chr19:41348707-41461560   | 110.854          |
| Cd82        | 1901                             | 0                                | 31.68485                  | 4138                      | 68.96667           | 131.596   | 3.761664       | Stalled        | chr2:93259268-93304653    | 43.386           |
| Snx29       | 1788                             | 0                                | 29.80143                  | 14168                     | 236.1333           | 40.2437   | 1.56189        | Elongating     | chr16:11403740-11755565   | 349.826          |
| Gm13152     | 1779                             | 1034                             | 29.65142                  | 220                       | 3.666667           | 0         | 0              | Unclassified   | chr4:146547974-146887529  | 337.556          |
| Rassf2      | 1734                             | 177                              | 28.90138                  | 3617                      | 60.28333           | 42.0895   | 3.877895       | Stalled        | chr2:131818586-131857724  | 37.139           |
| Sema4d      | 1692                             | 0                                | 28.20135                  | 4262                      | 71.03333           | 27.3733   | 2.477367       | Elongating     | chr13:51796616-51891013   | 92.398           |
| Bebp4       | 1677                             | 0                                | 27.95134                  | 1602                      | 26.7               | 0.083553  | 0.120007       | Stalled        | chr14:70238226-70459693   | 219.468          |
| Rasa3       | 1601                             | 0                                | 26.68461                  | 4521                      | 75.35              | 36.7137   | 7.700235       | Stalled        | chr8:13567217-13679587    | 110.371          |
| Fli1        | 1582                             | 410                              | 26.36793                  | 8908                      | 148.4667           | 21.6219   | 4.634234       | Stalled        | chr9:32229792-32350953    | 119.162          |
| Grap        | 1550                             | 57                               | 25.83457                  | 4595                      | 76.58333           | 154.777   | 1.41632        | Elongating     | chr11:61464822-61486279   | 19.458           |
| Sh3bp5      | 1539                             | 0                                | 25.65123                  | 3182                      | 53.03333           | 78.4109   | 4.048713       | Stalled        | chr14:32187149-32251219   | 62.071           |
| Adap1       | 1515                             | 0                                | 25.25121                  | 2877                      | 47.95              | 32.0649   | 2.441379       | Elongating     | chr5:139747829-139803418  | 53.59            |
| Auh         | 1478                             | 65                               | 24.63451                  | 5308                      | 88.46667           | 34.7152   | 3.291286       | Stalled        | chr13:52930478-53027046   | 94.569           |
| Sema4b      | 1467                             | 0                                | 24.45117                  | 3076                      | 51.26667           | 15.6429   | 0.273244       | Stalled        | chr7:87329726-87371410    | 39.685           |
| Il21r       | 1462                             | 75                               | 24.36783                  | 5239                      | 87.31667           | 115.093   | 3.302562       | Stalled        | chr7:132744942-132777084  | 30.143           |
| Nfat1       | 1452                             | 63                               | 24.20116                  | 2795                      | 46.58333           | 10.2327   | 3.430557       | Stalled        | chr18:80802943-80911810   | 106.868          |
| Izkf1       | 1444                             | 353                              | 24.06782                  | 7387                      | 123.1167           | 50.1722   | 3.142888       | Stalled        | chr11:11584215-11672929   | 86.715           |
| Foxn3       | 1383                             | 0                                | 23.0511                   | 6035                      | 100.5833           | 5.9717    | 0.444238       | Stalled        | chr12:100433303-100690284 | 254.982          |
| Prex1       | 1379                             | 0                                | 22.98443                  | 3936                      | 65.6               | 22.2186   | 8.719393       | Stalled        | chr2:166391844-166541332  | 147.489          |
| Adrbk1      | 1361                             | 85                               | 22.68442                  | 2170                      | 36.16667           | 97.7743   | 1.680008       | Elongating     | chr19:4286000-4307955     | 19.956           |
| Ncor2       | 1346                             | 0                                | 22.43441                  | 4235                      | 70.58333           | 14.913    | 4.249958       | Stalled        | chr5:125497524-125661584  | 162.061          |
| Pisd-ps2    | 1329                             | 145                              | 22.15106                  | 201                       | 3.35               | 15.8532   | 13.72975       | Stalled        | chr17:3064317-3086183     | 19.867           |
| Pip5k1c     | 1317                             | 79                               | 21.95105                  | 2627                      | 43.78333           | 45.0161   | 1.793373       | Elongating     | chr10:80753716-80782714   | 26.999           |
| Prkce       | 1308                             | 81                               | 21.80104                  | 3827                      | 63.78333           | 5.88386   | 4.387406       | Stalled        | chr17:86565929-87054029   | 486.101          |
| Hvcn1       | 1304                             | 0                                | 21.73437                  | 4019                      | 66.98333           | 89.9361   | 2.610322       | Elongating     | chr5:122657745-122692306  | 32.562           |
| Il16        | 1280                             | 214                              | 21.33436                  | 1800                      | 30                 | 22.7741   | 0.096677       | Stalled        | chr7:90791572-90886000    | 92.429           |
| Bach2       | 1273                             | 0                                | 21.21768                  | 6872                      | 114.5333           | 2.60177   | 6.18643        | Stalled        | chr4:32323924-32673083    | 347.16           |
| Cd83        | 1261                             | 0                                | 21.01767                  | 4321                      | 72.01667           | 111.469   | 2.979118       | Stalled        | chr13:43878475-43898501   | 18.027           |
| Myh9        | 1257                             | 0                                | 20.951                    | 4096                      | 68.26667           | 100.4     | 7.172564       | Stalled        | chr15:77591018-77674545   | 81.528           |
| Fam53b      | 1240                             | 0                                | 20.66766                  | 2249                      | 37.48333           | 7.53232   | 7.287639       | Stalled        | chr7:139903766-140006879  | 101.114          |
| Ccdc88c     | 1239                             | 0                                | 20.65099                  | 2762                      | 46.03333           | 16.532    | 8.534332       | Stalled        | chr12:102150909-102269193 | 116.285          |
| Gaint2      | 1224                             | 0                                | 20.40098                  | 902                       | 15.03333           | 10.5613   | 4.911231       | Stalled        | chr8:126753293-126869622  | 114.33           |
| Sykb        | 1212                             | 0                                | 20.20097                  | 1863                      | 31.05              | 58.3982   | 1.83547        | Elongating     | chr13:52690250-52744161   | 51.912           |
| Cdh23       | 1208                             | 0                                | 20.1343                   | 2080                      | 34.66667           | 0.231623  | 0.793251       | Stalled        | chr10:59766021-60161238   | 393.218          |
| Csk         | 1198                             | 214                              | 19.96762                  | 2087                      | 34.78333           | 155.099   | 2.983027       | Stalled        | chr9:57474452-57494987    | 18.536           |
| Itkpb       | 1197                             | 61                               | 19.95096                  | 2960                      | 49.33333           | 15.3642   | 4.772067       | Stalled        | chr1:182258606-182353790  | 93.185           |
| Irf8        | 1189                             | 58                               | 19.81762                  | 3610                      | 60.16667           | 167.044   | 2.469762       | Elongating     | chr8:123258275-123280592  | 20.318           |
| Ptpn1       | 1184                             | 61                               | 19.73428                  | 2432                      | 40.53333           | 36.4157   | 6.040814       | Stalled        | chr2:167755826-167804885  | 47.06            |
| Akna        | 1180                             | 0                                | 19.66761                  | 1765                      | 29.41667           | 42.601    | 5.316529       | Stalled        | chr4:63028161-63066479    | 36.319           |
| Phf15       | 1179                             | 0                                | 19.65094                  | 2269                      | 37.81667           | 14.5102   | 4.615299       | Stalled        | chr11:51626957-51672983   | 44.027           |
| Eps15l1     | 1170                             | 68                               | 19.50093                  | 1586                      | 26.43333           | 14.2777   | 12.98022       | Stalled        | chr8:74864895-74947373    | 80.479           |
| Tg          | 1166                             | 277                              | 19.43426                  | 1469                      | 24.48333           | 0.771733  | 0.108591       | Stalled        | chr15:66500331-66682282   | 179.952          |
| Myo1d       | 1164                             | 0                                | 19.40093                  | 1290                      | 21.5               | 0.52427   | 5.987019       | Stalled        | chr11:80295628-80595527   | 297.9            |
| Mbp         | 1147                             | 0                                | 19.11758                  | 1141                      | 19.01667           | 5.68108   | 5.867635       | Stalled        | chr18:82642514-82755029   | 110.516          |
| Rftn1       | 1141                             | 171                              | 19.01758                  | 8069                      | 134.4833           | 38.5802   | 7.026193       | Stalled        | chr17:50132631-50331822   | 197.192          |

|                      |      |     |          |       |          |          |          |              |                           |         |
|----------------------|------|-----|----------|-------|----------|----------|----------|--------------|---------------------------|---------|
| <b>Smad3</b>         | 1135 | 0   | 18.91757 | 1677  | 27.95    | 5.44841  | 14.98725 | Stalled      | chr9:63494573-63607801    | 111.229 |
| <b>Chst3</b>         | 1134 | 118 | 18.90091 | 3264  | 54.4     | 16.5244  | 7.367028 | Stalled      | chr10:59644277-59684008   | 37.732  |
| <b>Tk1</b>           | 1105 | 0   | 18.41755 | 4595  | 76.58333 | 30.5385  | 0.655891 | Stalled      | chr11:117676832-117689328 | 10.497  |
| <b>Eif2c2</b>        | 1099 | 0   | 18.31754 | 2490  | 41.5     | 6.62379  | 4.000468 | Stalled      | chr15:72932054-73017377   | 83.324  |
| <b>Irf4</b>          | 1094 | 844 | 18.23421 | 3298  | 54.96667 | 23.9082  | 2.87685  | Stalled      | chr13:30839126-30858796   | 17.671  |
| <b>Cbfa2t3</b>       | 1087 | 0   | 18.11753 | 2524  | 42.06667 | 9.14096  | 3.2315   | Stalled      | chr8:125149035-125225009  | 73.975  |
| <b>Laptm5</b>        | 1065 | 0   | 17.75085 | 5118  | 85.3     | 271.694  | 1.795428 | Elongating   | chr4:130467248-130492063  | 22.816  |
| <b>Psap</b>          | 1056 | 0   | 17.60084 | 2182  | 36.36667 | 207.521  | 3.836162 | Stalled      | chr10:59738375-59765347   | 24.973  |
| <b>Rac2</b>          | 1052 | 66  | 17.53417 | 2468  | 41.13333 | 158.053  | 2.237767 | Elongating   | chr15:78389598-78405213   | 13.616  |
| <b>Arid5a</b>        | 1047 | 58  | 17.45084 | 4993  | 83.21667 | 54.5218  | 1.633286 | Elongating   | chr1:36362598-36379820    | 15.223  |
| <b>Fmnl3</b>         | 1046 | 0   | 17.43417 | 2102  | 35.03333 | 39.0808  | 3.928843 | Stalled      | chr15:99147653-99202897   | 53.245  |
| <b>Gramd4</b>        | 1032 | 0   | 17.20082 | 2694  | 44.9     | 26.1463  | 0.313105 | Stalled      | chr15:85886136-85968064   | 79.929  |
| <b>Cxcr5</b>         | 1028 | 0   | 17.13415 | 2462  | 41.03333 | 37.1311  | 1.92232  | Elongating   | chr9:44319869-44336504    | 14.636  |
| <b>Apobec3</b>       | 1027 | 0   | 17.11749 | 3424  | 57.06667 | 81.0647  | 2.856928 | Stalled      | chr15:79720837-79738859   | 16.023  |
| <b>Arhgef10</b>      | 1027 | 77  | 17.11749 | 1491  | 24.85    | 1.05905  | 0.055953 | Stalled      | chr8:14909716-15001085    | 89.37   |
| <b>E2f2</b>          | 1024 | 57  | 17.06748 | 2622  | 43.7     | 24.6928  | 2.210985 | Elongating   | chr4:135726308-135751971  | 23.664  |
| <b>Inpp5d</b>        | 1022 | 153 | 17.03415 | 6320  | 105.3333 | 41.5067  | 4.435106 | Stalled      | chr1:89514886-89617083    | 100.198 |
| <b>Stk24</b>         | 1018 | 0   | 16.96748 | 3052  | 50.86667 | 24.0106  | 8.826986 | Stalled      | chr14:121685562-121780452 | 92.891  |
| <b>mmu-mir-21</b>    | 1014 | 366 | 16.90081 | 2445  | 40.75    | ND       | ND       | Stalled      | chr11:86390260-86403044   | 12.785  |
| <b>Plekha2</b>       | 1013 | 0   | 16.88414 | 5012  | 83.53333 | 29.0029  | 7.353249 | Stalled      | chr8:26149618-26214283    | 62.666  |
| <b>Gm7120</b>        | 1011 | 408 | 16.85081 | 62    | 1.033333 | 0        | 13.50885 | Stalled      | chr13:120274845-120284312 | 7.468   |
| <b>Trp2</b>          | 1009 | 0   | 16.81747 | 1533  | 25.55    | 23.2703  | 9.085232 | Stalled      | chr5:112703726-112744376  | 38.651  |
| <b>Trp53i11</b>      | 994  | 71  | 16.56746 | 2404  | 40.06667 | 75.4703  | 1.182775 | Elongating   | chr2:93025740-93041914    | 14.175  |
| <b>Nsmce1</b>        | 994  | 0   | 16.56746 | 1469  | 24.48333 | 60.4858  | 10.71537 | Stalled      | chr7:132611154-132637056  | 23.903  |
| <b>Bckdha</b>        | 977  | 0   | 16.28411 | 470   | 7.833333 | 13.4571  | 8.632655 | Stalled      | chr7:26414870-26445780    | 28.911  |
| <b>H2-Eb1</b>        | 974  | 70  | 16.23411 | 2485  | 41.41667 | 592.66   | 1.718181 | Elongating   | chr17:34440811-34453619   | 10.809  |
| <b>Ubxn11</b>        | 971  | 0   | 16.18411 | 1291  | 21.51667 | 4.34792  | 2.592951 | Elongating   | chr4:133656513-133682693  | 24.181  |
| <b>Wdfy4</b>         | 971  | 55  | 16.18411 | 11040 | 184      | 51.892   | 10.76307 | Stalled      | chr14:33772733-34000252   | 225.52  |
| <b>Lrrflp1</b>       | 969  | 0   | 16.15077 | 2041  | 34.01667 | 32.3571  | 9.755157 | Stalled      | chr1:92948020-93025521    | 75.502  |
| <b>Pvt1</b>          | 966  | 142 | 16.10077 | 5495  | 91.58333 | 2.79665  | 5.311832 | Stalled      | chr15:61867541-62082530   | 212.99  |
| <b>Tspan14</b>       | 961  | 0   | 16.01743 | 1863  | 31.05    | 9.75574  | 5.126285 | Stalled      | chr14:41719324-41782096   | 60.365  |
| <b>Agpat3</b>        | 960  | 0   | 16.00777 | 2273  | 37.88333 | 23.0282  | 1.278531 | Elongating   | chr10:77734307-77816445   | 80.139  |
| <b>Cd22</b>          | 956  | 0   | 15.9341  | 2203  | 36.71667 | 115.41   | 1.483955 | Elongating   | chr7:31650422-31667361    | 14.94   |
| <b>Mts1</b>          | 953  | 0   | 15.88409 | 2412  | 40.2     | 7.10047  | 6.354528 | Stalled      | chr15:58772794-58915581   | 140.788 |
| <b>Clec16a</b>       | 946  | 0   | 15.76742 | 1714  | 28.56667 | 3.88199  | 13.49196 | Stalled      | chr16:10543479-10744964   | 199.486 |
| <b>Pou2af1</b>       | 940  | 804 | 15.66742 | 4424  | 73.73333 | 268.606  | 4.81639  | Stalled      | chr9:51019794-51048184    | 26.391  |
| <b>Swp70</b>         | 939  | 0   | 15.65075 | 4500  | 75       | 109.943  | 4.932788 | Stalled      | chr7:117363216-117427019  | 61.804  |
| <b>Fbn1</b>          | 936  | 0   | 15.60075 | 5171  | 86.18333 | 57.0172  | 7.927412 | Stalled      | chr2:30881725-30999526    | 115.802 |
| <b>Cbl2i11</b>       | 933  | 0   | 15.55075 | 3620  | 60.33333 | 22.2864  | 4.594899 | Stalled      | chr2:127949773-127988283  | 36.511  |
| <b>Tbc1d16</b>       | 931  | 0   | 15.51741 | 562   | 9.366667 | 0.693267 | 3.527441 | Stalled      | chr11:119004357-119091813 | 85.457  |
| <b>Capzb</b>         | 915  | 0   | 15.25073 | 4044  | 67.4     | 151.625  | 7.987781 | Stalled      | chr4:138746845-138847727  | 98.883  |
| <b>Irak2</b>         | 913  | 0   | 15.2174  | 1035  | 17.25    | 6.07047  | 4.789034 | Stalled      | chr6:113586460-113645020  | 56.561  |
| <b>Pou2f2</b>        | 911  | 104 | 15.18406 | 2515  | 41.91667 | 36.994   | 3.031387 | Stalled      | chr7:25876135-25919479    | 41.345  |
| <b>Pik3cd</b>        | 900  | 0   | 15.00072 | 3286  | 54.76667 | 51.1434  | 2.975907 | Stalled      | chr4:149023278-149077738  | 52.461  |
| <b>Upf1</b>          | 895  | 0   | 14.91738 | 924   | 15.4     | 21.744   | 6.062778 | Stalled      | chr8:72855420-72879172    | 21.753  |
| <b>Arid3a</b>        | 893  | 0   | 14.88405 | 2548  | 42.46667 | 29.2884  | 4.143407 | Stalled      | chr10:79387816-79417757   | 27.942  |
| <b>Notch1</b>        | 889  | 0   | 14.81738 | 2580  | 43       | 8.29975  | 5.373687 | Stalled      | chr2:26313421-26361342    | 45.922  |
| <b>Tbc1d14</b>       | 883  | 68  | 14.71737 | 2368  | 39.46667 | 15.6621  | 7.237618 | Stalled      | chr5:36833252-36927046    | 91.795  |
| <b>Arap1</b>         | 880  | 0   | 14.66737 | 1694  | 28.23333 | 19.8035  | 4.77065  | Stalled      | chr7:108494582-108561100  | 64.519  |
| <b>Asb2</b>          | 870  | 0   | 14.50069 | 443   | 7.383333 | 2.72976  | 0.142016 | Stalled      | chr12:104559351-104596211 | 34.861  |
| <b>Abcg1</b>         | 865  | 0   | 14.41736 | 1187  | 19.78333 | 4.11312  | 4.662098 | Stalled      | chr17:31192638-31254926   | 60.289  |
| <b>Prkca</b>         | 863  | 72  | 14.38402 | 4209  | 70.15    | 3.20009  | 12.14721 | Stalled      | chr11:107794700-108207202 | 410.503 |
| <b>Gm672</b>         | 862  | 46  | 14.36736 | 773   | 12.88333 | 0.275791 | 1.022574 | Unclassified | chr18:75590870-75859350   | 266.481 |
| <b>Pmpa1</b>         | 847  | 0   | 14.11734 | 5161  | 86.01667 | 13.9593  | 1.900892 | Elongating   | chr2:173049665-173104034  | 52.07   |
| <b>Rara</b>          | 846  | 0   | 14.10068 | 2016  | 33.6     | 7.7597   | 2.19016  | Elongating   | chr11:98797009-98836256   | 37.248  |
| <b>C130026I21Rik</b> | 844  | 177 | 14.06734 | 148   | 2.466667 | 15.5063  | 1.627622 | Stalled      | chr1:85242918-85269141    | 24.224  |
| <b>Sema7a</b>        | 839  | 0   | 13.984   | 577   | 9.616667 | 22.9207  | 6.569704 | Stalled      | chr9:57785941-57810672    | 22.732  |
| <b>Cbl2i11</b>       | 827  | 92  | 13.78399 | 850   | 14.16667 | 24.7046  | 5.2238   | Stalled      | chr2:152606403-152659418  | 51.016  |
| <b>Mobkl2a</b>       | 819  | 0   | 13.65065 | 1731  | 28.85    | 34.8403  | 1.729325 | Elongating   | chr10:80147997-80166565   | 16.569  |
| <b>Ddx54</b>         | 818  | 53  | 13.63399 | 1324  | 22.06667 | 60.8744  | 3.263538 | Stalled      | chr5:121061138-121078601  | 15.464  |
| <b>Pxn</b>           | 818  | 0   | 13.63399 | 1061  | 17.68333 | 20.9597  | 6.094046 | Stalled      | chr5:115954710-116005995  | 49.286  |
| <b>Il4i1</b>         | 812  | 0   | 13.53398 | 1882  | 31.36667 | 362.057  | 1.296335 | Elongating   | chr7:52089657-52096178    | 4.522   |
| <b>Ssbp3</b>         | 807  | 0   | 13.45064 | 1600  | 26.66667 | 17.1668  | 14.45544 | Stalled      | chr4:106582074-106722299  | 138.226 |
| <b>Tbcd</b>          | 803  | 0   | 13.38397 | 1950  | 32.5     | 16.0705  | 12.19503 | Stalled      | chr11:121311262-121478484 | 165.223 |
| <b>Gdpd5</b>         | 794  | 0   | 13.23397 | 396   | 6.6      | 1.36283  | 12.73014 | Stalled      | chr7:106528058-106609494  | 79.437  |
| <b>Slc43a2</b>       | 793  | 0   | 13.2173  | 1006  | 16.76667 | 7.43514  | 9.126163 | Stalled      | chr11:75343211-75388543   | 43.333  |
| <b>Rin3</b>          | 792  | 0   | 13.20063 | 1150  | 19.16667 | 9.83532  | 8.156463 | Stalled      | chr12:103519283-103629062 | 107.78  |
| <b>Pikg</b>          | 790  | 129 | 13.1673  | 1996  | 33.26667 | 127.318  | 3.107613 | Stalled      | chr2:163482121-163551894  | 67.774  |
| <b>Inf2</b>          | 787  | 0   | 13.1173  | 1476  | 24.6     | 46.5956  | 4.445223 | Stalled      | chr12:113824994-113853768 | 26.775  |
| <b>Fam113b</b>       | 787  | 68  | 13.1173  | 3064  | 51.06667 | 25.7457  | 3.953583 | Stalled      | chr15:97075537-97216120   | 138.584 |
| <b>Ly6e</b>          | 782  | 194 | 13.03396 | 1583  | 26.38333 | 265.892  | 1.902485 | Elongating   | chr15:74783500-74790335   | 4.836   |
| <b>Acox1</b>         | 782  | 55  | 13.03396 | 910   | 15.16667 | 1.18769  | 0.227677 | Unclassified | chr2:127678363-127949626  | 269.264 |
| <b>Pde4b</b>         | 781  | 65  | 13.01729 | 1501  | 25.01667 | 5.46719  | 0        | Unclassified | chr4:101925543-102279867  | 352.325 |
| <b>Bzrap1</b>        | 776  | 35  | 12.93395 | 763   | 12.71667 | 4.21914  | 28.49656 | Stalled      | chr11:87572042-87599430   | 25.389  |
| <b>3110082I17Rik</b> | 767  | 0   | 12.78395 | 2052  | 34.2     | 13.5159  | 6.26109  | Stalled      | chr5:139835692-13998488   | 100.797 |
| <b>Fgd2</b>          | 765  | 0   | 12.75061 | 1284  | 21.4     | 77.7714  | 2.274339 | Elongating   | chr17:29495858-29516478   | 18.621  |
| <b>Dab2ip</b>        | 762  | 0   | 12.70061 | 483   | 8.05     | 0.470289 | 0.52415  | Unclassified | chr2:35411977-35586514    | 172.538 |
| <b>Rptor</b>         | 761  | 0   | 12.68394 | 3591  | 59.85    | 6.23714  | 11.3323  | Stalled      | chr11:119462308-119760905 | 296.598 |
| <b>Nup210</b>        | 756  | 72  | 12.6006  | 5099  | 84.98333 | 33.2369  | 7.427895 | Stalled      | chr6:90963060-91068820    | 103.761 |
| <b>Traf1</b>         | 755  | 0   | 12.58394 | 2444  | 40.73333 | 50.9335  | 1.451652 | Elongating   | chr2:34798777-34819292    | 18.516  |
| <b>Adora3</b>        | 755  | 152 | 12.58394 | 1177  | 19.61667 | 0        | 0        | Stalled      | chr3:105671824-105726959  | 53.136  |
| <b>Kdm4b</b>         | 750  | 0   | 12.5006  | 926   | 15.43333 | 7.92285  | 21.87351 | Stalled      | chr17:56463472-56542296   | 76.825  |
| <b>1700017B05Rik</b> | 749  | 161 | 12.48393 | 2035  | 33.91667 | 47.7244  | 1.847178 | Elongating   | chr9:57100129-57112406    | 10.278  |
| <b>Sp140</b>         | 749  | 171 | 12.48393 | 830   | 13.83333 | 48.054   | 9.130105 | Stalled      | chr1:87495277-87541611    | 44.335  |
| <b>Jakmip1</b>       | 742  | 0   | 12.36726 | 1050  | 17.5     | 11.437   | 3.072538 | Stalled      | chr5:37440095-37516537    | 74.443  |
| <b>Gng7</b>          | 741  | 0   | 12.35059 | 294   | 4.9      | 0.148567 | 2.544488 | Unclassified | chr10:80411368-80479670   | 66.303  |

|                 |     |     |          |       |          |          |          |              |                           |         |
|-----------------|-----|-----|----------|-------|----------|----------|----------|--------------|---------------------------|---------|
| <b>Unc13a</b>   | 734 | 0   | 12.23392 | 580   | 9.666667 | 2.36851  | 5.57569  | Stalled      | chr8:74150613-74197656    | 45.044  |
| <b>AI480653</b> | 734 | 0   | 12.23392 | 1773  | 29.55    | 6.50396  | 10.00478 | Stalled      | chr16:30955596-31083518   | 125.923 |
| <b>Ige</b>      | 730 | 0   | 12.16667 | 1812  | 30.2     | ND       | 0.709661 | Elongating   | chr12:114507354-114517995 | 8.641   |
| <b>Sbk1</b>     | 728 | 0   | 12.13391 | 597   | 9.95     | 15.4417  | 3.457733 | Stalled      | chr7:133414132-133438513  | 22.382  |
| <b>Hrh2</b>     | 728 | 0   | 12.13391 | 1277  | 21.28333 | 8.09478  | 6.393549 | Stalled      | chr13:54285497-54317801   | 30.305  |
| <b>Dexi</b>     | 726 | 0   | 12.10058 | 1379  | 22.98333 | 30.2044  | 2.197968 | Elongating   | chr16:10530299-10545147   | 12.849  |
| <b>Rad5111</b>  | 726 | 93  | 12.10058 | 2843  | 47.38333 | 1.32421  | 18.75389 | Stalled      | chr12:80396268-80915677   | 517.41  |
| <b>Brd2</b>     | 719 | 64  | 11.98391 | 3056  | 50.93333 | 64.7282  | 1.717668 | Elongating   | chr17:34248963-34260692   | 9.73    |
| <b>Coro1a</b>   | 714 | 126 | 11.90057 | 1756  | 29.26667 | 654.577  | 1.481953 | Elongating   | chr7:133843287-133850268  | 4.982   |
| <b>Slc5a10</b>  | 712 | 0   | 11.86724 | 1267  | 21.11667 | 0.146142 | 0.035783 | Stalled      | chr11:61486283-61536301   | 48.019  |
| <b>38968</b>    | 711 | 51  | 11.85057 | 1282  | 21.36667 | 40.715   | 4.182752 | Stalled      | chr11:117191626-117223639 | 30.014  |
| <b>Atxn711</b>  | 709 | 0   | 11.81723 | 3393  | 56.55    | 9.24734  | 7.597951 | Stalled      | chr12:33830557-34053142   | 220.586 |
| <b>Def6</b>     | 706 | 0   | 11.76723 | 768   | 12.8     | 38.7986  | 5.865281 | Stalled      | chr17:28342722-28365553   | 20.832  |
| <b>Txndc5</b>   | 706 | 534 | 11.76723 | 1499  | 24.98333 | 156.221  | 5.130339 | Stalled      | chr13:38592143-38622329   | 28.187  |
| <b>Ucp2</b>     | 705 | 46  | 11.75056 | 1669  | 27.81667 | 103.008  | 2.507535 | Elongating   | chr7:107639853-107650682  | 8.83    |
| <b>Bcl3</b>     | 705 | 72  | 11.75056 | 2115  | 35.25    | 50.5368  | 1.605424 | Elongating   | chr7:20393810-20410104    | 14.295  |
| <b>Erg</b>      | 703 | 0   | 11.71723 | 462   | 7.7      | 1.53949  | 0.268018 | Unclassified | chr16:95581810-95753972   | 170.163 |
| <b>Wipf1</b>    | 702 | 0   | 11.70056 | 2581  | 43.01667 | 35.0033  | 0.258066 | Stalled      | chr2:73267673-73369467    | 99.795  |
| <b>Arid1b</b>   | 699 | 0   | 11.65056 | 6081  | 101.35   | 7.66612  | 9.947525 | Stalled      | chr17:4993073-5347656     | 352.584 |
| <b>Srebfl2</b>  | 698 | 0   | 11.63389 | 2972  | 49.53333 | 92.1292  | 8.460823 | Stalled      | chr15:81975698-82035390   | 57.693  |
| <b>Arfgf2</b>   | 696 | 0   | 11.60056 | 1121  | 18.68333 | 7.46734  | 12.67435 | Stalled      | chr2:166629080-166723551  | 92.472  |
| <b>Zfp710</b>   | 694 | 0   | 11.56722 | 1822  | 30.36667 | 10.143   | 3.437423 | Stalled      | chr7:87167699-87237637    | 67.939  |
| <b>Fmnl1</b>    | 693 | 0   | 11.55055 | 907   | 15.11667 | 60.9621  | 3.066886 | Stalled      | chr11:103030451-103060214 | 27.764  |
| <b>Tmem154</b>  | 693 | 110 | 11.55055 | 807   | 13.45    | 8.33191  | 7.083972 | Stalled      | chr3:84468113-84508497    | 38.385  |
| <b>Mad11i</b>   | 693 | 0   | 11.55055 | 4494  | 74.9     | 11.4938  | 18.23482 | Stalled      | chr5:140484642-140799506  | 312.865 |
| <b>Cyth4</b>    | 691 | 0   | 11.51722 | 3263  | 54.38333 | 54.4395  | 2.932043 | Stalled      | chr15:78425476-78452449   | 24.974  |
| <b>Etv6</b>     | 691 | 65  | 11.51722 | 4534  | 75.56667 | 7.04544  | 12.87803 | Stalled      | chr6:133983724-134220165  | 234.442 |
| <b>Rbm38</b>    | 690 | 0   | 11.50055 | 1210  | 20.16667 | 82.7853  | 3.292223 | Stalled      | chr2:172845402-172860232  | 12.831  |
| <b>Nfrsf1b</b>  | 690 | 0   | 11.50055 | 761   | 12.68333 | 6.9288   | 7.801396 | Stalled      | chr4:144802270-144838773  | 34.504  |
| <b>Ccm2</b>     | 688 | 0   | 11.46722 | 1433  | 23.88333 | 39.1682  | 16.89124 | Stalled      | chr11:6444958-6496747     | 49.79   |
| <b>Slc9a8</b>   | 686 | 0   | 11.43388 | 2547  | 42.45    | 7.05965  | 8.304777 | Stalled      | chr2:167245220-167302498  | 55.279  |
| <b>Ttpal</b>    | 685 | 196 | 11.41721 | 1480  | 24.66667 | 13.4174  | 3.653102 | Stalled      | chr2:163426049-163444749  | 16.701  |
| <b>Sik1</b>     | 683 | 0   | 11.38388 | 1890  | 31.5     | 30.5221  | 1.464642 | Elongating   | chr17:31981194-31994737   | 11.544  |
| <b>Blk</b>      | 683 | 0   | 11.38388 | 762   | 12.7     | 19.9123  | 4.737029 | Stalled      | chr14:63991673-64038024   | 44.352  |
| <b>Slc7a5</b>   | 682 | 0   | 11.36721 | 2239  | 37.31667 | 34.7392  | 4.083035 | Stalled      | chr8:124405045-124433586  | 26.542  |
| <b>Sardh</b>    | 682 | 0   | 11.36721 | 155   | 2.583333 | 0.083277 | 0.266904 | Unclassified | chr2:27044901-27104332    | 57.432  |
| <b>Macrod1</b>  | 680 | 0   | 11.33388 | 990   | 16.5     | 5.04528  | 11.17109 | Stalled      | chr19:7129257-7272552     | 141.296 |
| <b>Lrrc33</b>   | 679 | 0   | 11.31721 | 1918  | 31.96667 | 28.4589  | 4.186251 | Stalled      | chr16:32142910-32167562   | 22.653  |
| <b>Osbp10</b>   | 675 | 102 | 11.25054 | 354   | 5.9      | 0.082156 | 0.633062 | Unclassified | chr9:114974396-115114341  | 164.946 |
| <b>Rasal1</b>   | 674 | 0   | 11.23387 | 501   | 8.35     | 6.69093  | 6.506865 | Stalled      | chr5:121096830-121129602  | 30.773  |
| <b>Hist1h1c</b> | 673 | 161 | 11.2172  | 474   | 7.9      | 16.4091  | 0.891337 | Elongating   | chr13:23828675-23832235   | 1.561   |
| <b>Arhgap26</b> | 673 | 0   | 11.2172  | 1724  | 28.73333 | 2.12668  | 26.67193 | Stalled      | chr18:39150798-39535939   | 383.142 |
| <b>Ccbp2</b>    | 668 | 0   | 11.13387 | 351   | 5.85     | 9.24227  | 0.127986 | Stalled      | chr9:121805581-121820182  | 12.602  |
| <b>Srebfl1</b>  | 667 | 0   | 11.1172  | 1649  | 27.48333 | 29.9641  | 3.871093 | Stalled      | chr11:60012590-60036106   | 21.517  |
| <b>H2-Aa</b>    | 666 | 0   | 11.10053 | 1288  | 21.46667 | 769.339  | 1.285648 | Elongating   | chr17:34419695-34426716   | 5.022   |
| <b>Actb</b>     | 664 | 174 | 11.0672  | 1347  | 22.45    | 759.674  | 1.692156 | Elongating   | chr5:143664794-143670403  | 3.61    |
| <b>Coro2a</b>   | 664 | 0   | 11.0672  | 1062  | 17.7     | 17.281   | 0.470507 | Stalled      | chr4:46549808-46581312    | 29.505  |
| <b>Tex14</b>    | 662 | 243 | 11.03386 | 3660  | 61       | 0.094178 | 4.5206   | Stalled      | chr11:87216566-87369325   | 150.76  |
| <b>Csrnp1</b>   | 661 | 72  | 11.01719 | 2266  | 37.76667 | 25.3536  | 0.109669 | Stalled      | chr9:119880283-119895776  | 13.494  |
| <b>B4gal1</b>   | 658 | 0   | 10.96719 | 3950  | 65.83333 | 43.1031  | 7.444174 | Stalled      | chr4:40751634-40803031    | 49.398  |
| <b>Cabin1</b>   | 657 | 0   | 10.95052 | 2812  | 46.86667 | 13.9246  | 14.93006 | Stalled      | chr10:75108854-75229102   | 118.249 |
| <b>Fads2</b>    | 655 | 0   | 10.91719 | 773   | 12.88333 | 42.8097  | 14.18902 | Stalled      | chr19:10138653-10177993   | 37.341  |
| <b>Zdhhc14</b>  | 655 | 0   | 10.91719 | 954   | 15.9     | 5.73797  | 39.87052 | Stalled      | chr17:5490599-5753891     | 261.293 |
| <b>Rere</b>     | 654 | 0   | 10.90052 | 3631  | 60.51667 | 19.6835  | 17.6783  | Stalled      | chr4:149654024-149996075  | 340.052 |
| <b>Ehd1</b>     | 651 | 0   | 10.85052 | 668   | 11.13333 | 24.467   | 6.433479 | Stalled      | chr19:6274895-6300096     | 23.202  |
| <b>Abr</b>      | 650 | 0   | 10.83385 | 1065  | 17.75    | 2.62506  | 0.783652 | Stalled      | chr11:76230235-76393229   | 160.995 |
| <b>Trio</b>     | 650 | 0   | 10.83385 | 1682  | 28.03333 | 1.19709  | 3.126312 | Stalled      | chr15:27660403-27957603   | 295.201 |
| <b>Zmynd8</b>   | 649 | 0   | 10.81718 | 2920  | 48.66667 | 20.6537  | 7.845433 | Stalled      | chr2:165609653-165712188  | 100.536 |
| <b>Vgll4</b>    | 647 | 0   | 10.78385 | 1447  | 24.11667 | 15.8321  | 3.506599 | Stalled      | chr6:114812107-114873770  | 59.664  |
| <b>Tmem189</b>  | 646 | 0   | 10.76718 | 1117  | 18.61667 | 28.5792  | 3.542623 | Stalled      | chr2:167468724-167489044  | 18.321  |
| <b>Rxra</b>     | 646 | 0   | 10.76718 | 655   | 10.91667 | 3.33805  | 1.150084 | Stalled      | chr2:27530720-27618839    | 86.12   |
| <b>Sh2b3</b>    | 643 | 0   | 10.71718 | 2088  | 34.8     | 26.5668  | 3.582441 | Stalled      | chr5:122267223-122288810  | 19.588  |
| <b>Nkd1</b>     | 643 | 0   | 10.71718 | 209   | 3.483333 | 0.436736 | 3.607308 | Unclassified | chr8:91043242-91118785    | 73.544  |
| <b>Fam49b</b>   | 642 | 0   | 10.70051 | 3727  | 62.11667 | 15.8401  | 8.955843 | Stalled      | chr15:63760649-63894010   | 131.362 |
| <b>Dnajb12</b>  | 640 | 0   | 10.66718 | 923   | 15.38333 | 17.2416  | 3.984153 | Stalled      | chr10:59340338-59360764   | 18.427  |
| <b>Scl12a3</b>  | 640 | 0   | 10.66718 | 402   | 6.7      | 0.206105 | 0.575533 | Stalled      | chr8:96851107-96890119    | 37.013  |
| <b>Lrp1</b>     | 639 | 0   | 10.65051 | 176   | 2.933333 | 0.309772 | 3.178083 | Unclassified | chr10:126975213-127060204 | 82.992  |
| <b>Nfat2</b>    | 639 | 0   | 10.65051 | 857   | 14.28333 | 1.67054  | 9.892383 | Stalled      | chr2:168301909-168417783  | 113.875 |
| <b>Ldlrap1</b>  | 638 | 0   | 10.63384 | 242   | 4.033333 | 5.28229  | 4.833365 | Stalled      | chr4:134301326-134325919  | 22.594  |
| <b>Snx8</b>     | 638 | 0   | 10.63384 | 1834  | 30.56667 | 71.4947  | 5.961576 | Stalled      | chr5:140816256-140867201  | 48.946  |
| <b>Lhpp</b>     | 638 | 0   | 10.63384 | 505   | 8.416667 | 6.5145   | 19.91075 | Stalled      | chr7:139800325-139898102  | 95.778  |
| <b>Traf5</b>    | 636 | 66  | 10.60051 | 824   | 13.73333 | 12.0398  | 16.95332 | Stalled      | chr1:193821087-193918445  | 95.359  |
| <b>Afmid</b>    | 633 | 0   | 10.55051 | 719   | 11.98333 | 5.54923  | 6.050978 | Stalled      | chr11:117685232-117701220 | 13.989  |
| <b>Gse1</b>     | 633 | 0   | 10.55051 | 1981  | 33.01667 | 5.9349   | 3.179334 | Stalled      | chr8:123010765-123105281  | 92.517  |
| <b>Nfkb1</b>    | 633 | 71  | 10.55051 | 11759 | 195.9833 | 90.8503  | 2.927395 | Elongating   | chr3:135247618-135356511  | 106.894 |
| <b>Mgll</b>     | 632 | 0   | 10.53384 | 393   | 6.55     | 4.97755  | 8.095613 | Stalled      | chr6:88672405-88778353    | 103.949 |
| <b>Plekho2</b>  | 631 | 59  | 10.51717 | 1902  | 31.7     | 30.178   | 3.326766 | Stalled      | chr9:65402190-65429841    | 25.652  |
| <b>Ppp2r5c</b>  | 630 | 0   | 10.5005  | 1809  | 30.15    | 23.5701  | 14.40823 | Stalled      | chr12:111721948-111821271 | 97.324  |
| <b>Foxp1</b>    | 630 | 142 | 10.5005  | 4807  | 80.11667 | 11.4778  | 0.506304 | Stalled      | chr6:98880083-99115012    | 232.93  |
| <b>Map3k14</b>  | 628 | 0   | 10.46717 | 2133  | 35.55    | 9.66992  | 5.242407 | Stalled      | chr11:103081077-103130715 | 47.639  |
| <b>Pml</b>      | 626 | 46  | 10.43383 | 3114  | 51.9     | 46.6166  | 2.24077  | Elongating   | chr9:58064986-58099593    | 32.608  |
| <b>Ninj2</b>    | 626 | 0   | 10.43383 | 883   | 14.71667 | 0.202691 | 0.857143 | Stalled      | chr6:120041397-120150356  | 106.96  |
| <b>Zc3h12d</b>  | 625 | 68  | 10.41717 | 1474  | 24.56667 | 13.7075  | 3.299482 | Stalled      | chr10:7550267-7590194     | 37.928  |
| <b>Hdac7</b>    | 625 | 0   | 10.41717 | 1462  | 24.36667 | 22.2347  | 2.98872  | Stalled      | chr15:97623111-97664102   | 38.992  |
| <b>Fam102a</b>  | 623 | 0   | 10.38383 | 411   | 6.85     | 10.2309  | 17.88402 | Stalled      | chr2:32388878-32425270    | 34.393  |
| <b>Lpp</b>      | 623 | 0   | 10.38383 | 4681  | 78.01667 | 0.81611  | 28.44265 | Stalled      | chr16:24391435-24992662   | 599.228 |



|                      |     |     |          |       |          |          |          |              |                           |          |
|----------------------|-----|-----|----------|-------|----------|----------|----------|--------------|---------------------------|----------|
| <b>Mical3</b>        | 621 | 0   | 10.3505  | 862   | 14.36667 | 2.43338  | 1.176608 | Stalled      | chr6:120957257-121033627  | 74.371   |
| <b>Aff3</b>          | 621 | 0   | 10.3505  | 16353 | 272.55   | 16.7907  | 11.44357 | Stalled      | chr1:38234171-38723800    | 487.63   |
| <b>Rab8a</b>         | 619 | 45  | 10.31716 | 1039  | 17.31667 | 60.3261  | 6.829101 | Stalled      | chr8:74683098-74705265    | 20.168   |
| <b>Phc2</b>          | 617 | 0   | 10.28383 | 1575  | 26.25    | 23.8409  | 0.115619 | Stalled      | chr4:128380239-128430118  | 47.88    |
| <b>Zdhhc18</b>       | 615 | 0   | 10.25049 | 1082  | 18.03333 | 39.9179  | 1.493116 | Elongating   | chr4:133162906-133191344  | 26.439   |
| <b>Ptpn6</b>         | 613 | 0   | 10.21716 | 1421  | 23.68333 | 126.082  | 2.425542 | Elongating   | chr6:124670735-124685163  | 12.429   |
| <b>Sla</b>           | 613 | 210 | 10.21716 | 680   | 11.33333 | 10.0575  | 4.410335 | Stalled      | chr15:66612425-66646155   | 31.731   |
| <b>H2-Ab1</b>        | 611 | 0   | 10.18382 | 1465  | 24.41667 | 1402.72  | 1.604188 | Elongating   | chr17:34398184-344006355  | 6.172    |
| <b>Dido1</b>         | 610 | 0   | 10.16715 | 1750  | 29.16667 | 13.9313  | 5.894213 | Stalled      | chr2:180392668-180446704  | 52.037   |
| <b>Tnip1</b>         | 610 | 0   | 10.16715 | 1516  | 25.26667 | 16.9938  | 1.697317 | Elongating   | chr11:54724288-54778440   | 52.153   |
| <b>Zfpm1</b>         | 608 | 0   | 10.13382 | 961   | 16.01667 | 9.86931  | 2.718438 | Elongating   | chr8:124804040-124861147  | 55.108   |
| <b>Slc45a4</b>       | 607 | 0   | 10.11715 | 258   | 4.3      | 2.85993  | 0.432436 | Stalled      | chr15:73410722-73457174   | 44.453   |
| <b>Cyfp2</b>         | 607 | 0   | 10.11715 | 3790  | 63.16667 | 25.9892  | 5.893502 | Stalled      | chr11:46007359-46127852   | 118.494  |
| <b>Cxxc5</b>         | 605 | 0   | 10.08382 | 639   | 10.65    | 2.87659  | 0.967815 | Stalled      | chr18:35987471-36021342   | 31.872   |
| <b>Cerk</b>          | 605 | 0   | 10.08382 | 1129  | 18.81667 | 20.0981  | 3.526348 | Stalled      | chr15:85969532-86018571   | 47.04    |
| <b>Sbno2</b>         | 604 | 0   | 10.06715 | 2603  | 43.38333 | 24.6825  | 3.578319 | Stalled      | chr10:79519758-79567447   | 45.69    |
| <b>Ralgds</b>        | 602 | 0   | 10.03381 | 741   | 12.35    | 10.6292  | 2.034411 | Elongating   | chr2:28386983-28408601    | 19.619   |
| <b>Rab35</b>         | 599 | 0   | 9.983812 | 2567  | 42.78333 | 139.883  | 2.624657 | Elongating   | chr5:116079995-116097167  | 15.173   |
| <b>Med13l</b>        | 598 | 0   | 9.967144 | 4801  | 80.01667 | 5.34768  | 4.518319 | Stalled      | chr5:119008727-119215446  | 204.72   |
| <b>Cacna1d</b>       | 598 | 81  | 9.967144 | 1326  | 22.1     | 0.250544 | 4.562468 | Stalled      | chr14:30853124-31306342   | 451.219  |
| <b>Myo18a</b>        | 597 | 0   | 9.950477 | 1228  | 20.46667 | 8.48402  | 0.066669 | Stalled      | chr11:77588766-77679482   | 88.717   |
| <b>Taok3</b>         | 597 | 0   | 9.950477 | 2810  | 46.83333 | 20.176   | 6.32998  | Stalled      | chr5:117581603-117723924  | 140.322  |
| <b>Ildr1</b>         | 596 | 0   | 9.933809 | 780   | 13       | 2.60055  | 0.898374 | Stalled      | chr16:36692123-36726827   | 32.705   |
| <b>Stoml1</b>        | 594 | 0   | 9.900474 | 585   | 9.75     | 23.6435  | 4.396366 | Stalled      | chr9:58098970-58110330    | 9.361    |
| <b>Bcl2</b>          | 594 | 122 | 9.900474 | 1372  | 22.86667 | 20.3921  | 13.69562 | Stalled      | chr1:108434755-108612867  | 176.113  |
| <b>Dock2</b>         | 594 | 82  | 9.900474 | 8844  | 147.4    | 24.5221  | 16.63428 | Stalled      | chr11:34126863-34599325   | 470.463  |
| <b>Adora2a</b>       | 593 | 0   | 9.883807 | 342   | 5.7      | 6.32611  | 5.070339 | Stalled      | chr10:74777687-74797533   | 17.847   |
| <b>H13</b>           | 593 | 0   | 9.883807 | 1731  | 28.85    | 60.1825  | 5.334374 | Stalled      | chr2:152493196-152534404  | 39.209   |
| <b>Cpne5</b>         | 593 | 0   | 9.883807 | 307   | 5.116667 | 0.33171  | 0.62182  | Unclassified | chr17:29293465-29376735   | 81.271   |
| <b>Nod2</b>          | 592 | 62  | 9.867139 | 374   | 6.233333 | 2.01595  | 3.682191 | Stalled      | chr8:91169245-91212373    | 41.129   |
| <b>Trpm8</b>         | 592 | 255 | 9.867139 | 91    | 1.516667 | 0.070016 | 0.471364 | Unclassified | chr1:90201286-90285426    | 82.141   |
| <b>Gimap4</b>        | 591 | 78  | 9.850472 | 1009  | 16.81667 | 129.92   | 1.066644 | Elongating   | chr6:48632576-48642061    | 7.486    |
| <b>Card11</b>        | 591 | 0   | 9.850472 | 4685  | 78.08333 | 41.7957  | 3.446769 | Stalled      | chr5:141348952-141478550  | 127.599  |
| <b>Cyb5r3</b>        | 589 | 0   | 9.817137 | 1158  | 19.3     | 125.998  | 6.973504 | Stalled      | chr15:82983931-83004638   | 18.708   |
| <b>Ubash3b</b>       | 588 | 0   | 9.80047  | 945   | 15.75    | 3.60389  | 3.939542 | Stalled      | chr9:40821723-40967577    | 143.855  |
| <b>Rnf123</b>        | 587 | 0   | 9.783802 | 1054  | 17.56667 | 11.1763  | 0.509034 | Stalled      | chr9:107954170-107982134  | 25.965   |
| <b>Pold1</b>         | 586 | 0   | 9.767135 | 629   | 10.48333 | 25.3967  | 6.084683 | Stalled      | chr7:51788113-51806185    | 16.073   |
| <b>Prr5</b>          | 586 | 0   | 9.767135 | 1357  | 22.61667 | 36.6259  | 2.37418  | Elongating   | chr15:84509427-84534103   | 22.677   |
| <b>Blnk</b>          | 586 | 61  | 9.767135 | 3786  | 63.1     | 53.1406  | 3.657857 | Stalled      | chr19:41003416-41071025   | 65.61    |
| <b>4831426I19Rik</b> | 584 | 0   | 9.7338   | 1400  | 23.33333 | 7.50043  | 10.82521 | Stalled      | chr12:106168158-106250019 | 79.862   |
| <b>Lasp1</b>         | 583 | 0   | 9.717132 | 540   | 9        | 25.002   | 13.77223 | Stalled      | chr11:97658985-97700078   | 39.094   |
| <b>Msi2</b>          | 582 | 62  | 9.700465 | 6140  | 102.3333 | 3.96942  | 14.06841 | Stalled      | chr11:88152883-88581543   | 426.661  |
| <b>Vav1</b>          | 581 | 0   | 9.683797 | 1834  | 30.56667 | 26.8699  | 8.219509 | Stalled      | chr17:57416522-57486859   | 50.138   |
| <b>Zfp217</b>        | 574 | 0   | 9.567125 | 1753  | 29.21667 | 18.1559  | 2.772495 | Elongating   | chr2:169934142-169958720  | 22.579   |
| <b>Ptp4a3</b>        | 573 | 0   | 9.550458 | 933   | 15.55    | 64.0996  | 2.43875  | Elongating   | chr15:73576455-73589196   | 10.742   |
| <b>Grk6</b>          | 573 | 0   | 9.550458 | 1162  | 19.36667 | 69.3059  | 2.480888 | Elongating   | chr13:55544694-55562288   | 15.595   |
| <b>Tbc1d17</b>       | 571 | 0   | 9.517123 | 631   | 10.51667 | 7.86004  | 1.293214 | Elongating   | chr7:52096145-52106449    | 8.305    |
| <b>Fam65b</b>        | 571 | 0   | 9.517123 | 2579  | 42.98333 | 11.5943  | 3.330511 | Stalled      | chr13:24704478-24825675   | 119.198  |
| <b>Pim1</b>          | 569 | 164 | 9.483788 | 1848  | 30.8     | 139.598  | 1.73068  | Elongating   | chr17:29625989-29632404   | 4.416    |
| <b>Ap3d1</b>         | 569 | 0   | 9.483788 | 953   | 15.88333 | 21.7824  | 3.086312 | Stalled      | chr10:80169722-80206956   | 35.235   |
| <b>Dnajc7</b>        | 569 | 0   | 9.483788 | 1516  | 25.26667 | 81.5361  | 3.206628 | Stalled      | chr11:100444149-100483482 | 37.334   |
| <b>Rnf220</b>        | 569 | 0   | 9.483788 | 1620  | 27       | 20.8392  | 0.486763 | Stalled      | chr4:116944068-117171520  | 225.453  |
| <b>Gpr183</b>        | 567 | 84  | 9.450453 | 2310  | 38.5     | 17.1015  | 0.756234 | Stalled      | chr14:122351552-122366415 | 12.864   |
| <b>Relt</b>          | 566 | 0   | 9.433785 | 974   | 16.23333 | 9.08038  | 5.803493 | Stalled      | chr7:107994361-108013927  | 17.567   |
| <b>Foxk1</b>         | 565 | 0   | 9.417118 | 1267  | 21.11667 | 9.306    | 5.204837 | Stalled      | chr5:142875450-142937969  | 60.52    |
| <b>Trappc9</b>       | 565 | 0   | 9.417118 | 1999  | 33.31667 | 5.4179   | 22.67572 | Stalled      | chr15:72420050-72893634   | 471.585  |
| <b>Dnmt3a</b>        | 564 | 0   | 9.40045  | 2578  | 42.96667 | 13.3847  | 3.450391 | Stalled      | chr12:3804979-3914443     | 107.465  |
| <b>Chd5</b>          | 562 | 0   | 9.367116 | 178   | 2.966667 | 0.109644 | 1.32696  | Unclassified | chr4:151710759-151764303  | 51.545   |
| <b>Camk2b</b>        | 562 | 54  | 9.367116 | 2030  | 33.83333 | 0.950389 | 0.134108 | Stalled      | chr11:5869669-5967661     | 95.993   |
| <b>Gfnd1</b>         | 562 | 0   | 9.367116 | 307   | 5.116667 | 1.47133  | 10.64464 | Stalled      | chr13:43290887-43401541   | 108.655  |
| <b>Zc3h12a</b>       | 561 | 0   | 9.350448 | 1277  | 21.28333 | 22.3798  | 2.365184 | Elongating   | chr4:124795657-124807125  | 9.469    |
| <b>Pole2</b>         | 561 | 0   | 9.350448 | 2184  | 36.4     | 13.6075  | 4.152276 | Stalled      | chr12:70302765-70331177   | 26.413   |
| <b>Agbl4</b>         | 560 | 0   | 9.333781 | 2440  | 40.66667 | 0.078409 | 0        | Unclassified | chr4:110068395-111330115  | 1259.721 |
| <b>Abli2</b>         | 559 | 0   | 9.317113 | 265   | 4.416667 | 0.277302 | 2.900895 | Unclassified | chr5:36098579-36227619    | 127.041  |
| <b>Slit1</b>         | 559 | 0   | 9.317113 | 373   | 6.216667 | 0.37436  | 1.936007 | Unclassified | chr19:41674746-41820346   | 143.601  |
| <b>Pgs1</b>          | 554 | 0   | 9.233776 | 1310  | 21.83333 | 14.4263  | 3.572207 | Stalled      | chr11:117846170-117885325 | 37.156   |
| <b>Fam107b</b>       | 554 | 72  | 9.233776 | 1602  | 26.7     | 24.1402  | 9.120052 | Stalled      | chr2:3628729-3699406      | 68.678   |
| <b>Pstpip1</b>       | 553 | 0   | 9.217108 | 919   | 15.31667 | 28.3571  | 8.439725 | Stalled      | chr9:55935782-55976697    | 38.916   |
| <b>Panx1</b>         | 553 | 79  | 9.217108 | 1145  | 19.08333 | 16.9217  | 7.649462 | Stalled      | chr9:14810228-14851922    | 39.695   |
| <b>Rai1</b>          | 553 | 0   | 9.217108 | 2640  | 44       | 10.017   | 1.602398 | Elongating   | chr11:59916514-60012697   | 94.184   |
| <b>Slamf6</b>        | 551 | 132 | 9.183773 | 1345  | 22.41667 | 21.5319  | 5.379643 | Stalled      | chr1:173845667-173873999  | 26.333   |
| <b>Gna15</b>         | 549 | 0   | 9.150438 | 707   | 11.78333 | 18.2391  | 3.907291 | Stalled      | chr10:80965058-80988970   | 21.913   |
| <b>Scd2</b>          | 548 | 0   | 9.133771 | 1520  | 25.33333 | 110.468  | 3.054581 | Stalled      | chr19:44366165-44381352   | 13.188   |
| <b>Vars</b>          | 547 | 0   | 9.117104 | 2052  | 34.2     | 114.803  | 3.511028 | Stalled      | chr17:35135851-35153274   | 15.424   |
| <b>Snx30</b>         | 547 | 0   | 9.117104 | 2088  | 34.8     | 6.91735  | 12.02541 | Stalled      | chr4:59816521-59917612    | 99.092   |
| <b>Spib</b>          | 546 | 0   | 9.100436 | 691   | 11.51667 | 96.3278  | 2.443878 | Elongating   | chr7:51781364-51789441    | 6.078    |
| <b>D8ErtD82e</b>     | 545 | 0   | 9.083769 | 3848  | 64.13333 | 33.2153  | 3.6906   | Stalled      | chr8:37155881-37210841    | 52.961   |
| <b>Bin1</b>          | 545 | 0   | 9.083769 | 868   | 14.46667 | 31.7819  | 0.994463 | Stalled      | chr18:32534870-32595394   | 58.525   |
| <b>Ikzf3</b>         | 545 | 123 | 9.083769 | 3419  | 56.98333 | 36.5862  | 6.290661 | Stalled      | chr11:98326006-98409345   | 81.34    |
| <b>St3gal1</b>       | 544 | 0   | 9.067101 | 920   | 15.33333 | 4.78304  | 14.18994 | Stalled      | chr15:66934436-67010444   | 74.009   |
| <b>Eef2</b>          | 541 | 0   | 9.017099 | 1393  | 23.21667 | 1295.41  | 1.504007 | Elongating   | chr10:80637375-80645252   | 5.878    |
| <b>Hnrrpl</b>        | 541 | 0   | 9.017099 | 1988  | 33.13333 | 96.0545  | 2.077285 | Elongating   | chr7:29593908-29607285    | 11.378   |
| <b>Sh3bp2</b>        | 541 | 0   | 9.017099 | 1586  | 26.43333 | 22.2045  | 4.156036 | Stalled      | chr5:34866432-34906287    | 37.856   |
| <b>Gpr132</b>        | 540 | 0   | 9.000431 | 796   | 13.26667 | 20.6538  | 3.055026 | Stalled      | chr12:114089086-114101127 | 10.042   |
| <b>Nup62</b>         | 540 | 0   | 9.000431 | 1365  | 22.75    | 76.3839  | 4.613578 | Stalled      | chr7:52069789-52086176    | 14.388   |
| <b>Klf13</b>         | 540 | 0   | 9.000431 | 1851  | 30.85    | 11.8448  | 11.38321 | Stalled      | chr7:71031237-71085801    | 52.565   |

|                      |     |     |          |      |           |          |          |              |                           |         |
|----------------------|-----|-----|----------|------|-----------|----------|----------|--------------|---------------------------|---------|
| <b>Tcof1</b>         | 539 | 0   | 8.983764 | 2571 | 42.85     | 48.4431  | 1.806537 | Elongating   | chr18:60974195-61010562   | 34.368  |
| <b>Atp2b2</b>        | 539 | 0   | 8.983764 | 520  | 8.666667  | 0.101813 | 0.72449  | Unclassified | chr6:113695661-113994020  | 296.36  |
| <b>Tlr9</b>          | 537 | 65  | 8.950429 | 264  | 4.4       | 13.0315  | 2.589345 | Stalled      | chr9:106122928-106129207  | 4.28    |
| <b>Wpp5c</b>         | 537 | 0   | 8.950429 | 1319 | 21.983333 | 63.1984  | 2.225186 | Elongating   | chr7:17589991-17615263    | 23.273  |
| <b>Wwox</b>          | 537 | 0   | 8.950429 | 2553 | 42.55     | 4.96958  | 30.53313 | Stalled      | chr8:116961551-117876612  | 913.062 |
| <b>Snn</b>           | 536 | 0   | 8.933761 | 674  | 11.233333 | 39.0953  | 3.609388 | Stalled      | chr16:11064390-11075078   | 8.689   |
| <b>Fam169b</b>       | 536 | 53  | 8.933761 | 2713 | 45.21667  | 11.9505  | 0.06301  | Stalled      | chr7:75416724-75507976    | 89.253  |
| <b>Sorl1</b>         | 533 | 0   | 8.883759 | 2042 | 34.033333 | 8.76738  | 8.244637 | Stalled      | chr9:41776571-41934372    | 155.802 |
| <b>Kcnn4</b>         | 532 | 0   | 8.867092 | 980  | 16.333333 | 45.4715  | 2.947331 | Stalled      | chr7:25153281-25170230    | 14.95   |
| <b>Gns</b>           | 532 | 0   | 8.867092 | 889  | 14.81667  | 14.849   | 5.620847 | Stalled      | chr10:120800145-120834301 | 32.157  |
| <b>Camkk1</b>        | 529 | 0   | 8.817089 | 226  | 3.766667  | 2.33134  | 1.689602 | Elongating   | chr11:72830509-72855567   | 23.059  |
| <b>Birc3</b>         | 527 | 0   | 8.783754 | 2492 | 41.533333 | 32.589   | 3.032464 | Stalled      | chr9:7848700-7875170      | 24.471  |
| <b>Bcl11a</b>        | 527 | 0   | 8.783754 | 3586 | 59.76667  | 31.2485  | 2.233892 | Elongating   | chr11:23976055-24073558   | 95.504  |
| <b>Chst11</b>        | 527 | 0   | 8.783754 | 2988 | 49.8      | 5.37755  | 12.57399 | Stalled      | chr10:82446241-82658636   | 210.396 |
| <b>Hemk1</b>         | 522 | 0   | 8.700417 | 1484 | 24.733333 | 8.06521  | 1.50517  | Elongating   | chr9:107229412-107242681  | 11.27   |
| <b>Nfkbil1</b>       | 521 | 0   | 8.683749 | 519  | 8.65      | 13.399   | 5.761953 | Stalled      | chr17:35357119-35374760   | 15.642  |
| <b>Bid2</b>          | 521 | 0   | 8.683749 | 407  | 6.7833333 | 9.97644  | 19.40774 | Stalled      | chr13:49434917-49482394   | 45.478  |
| <b>Ppp3cc</b>        | 521 | 160 | 8.683749 | 2152 | 35.86667  | 27.9438  | 13.39602 | Stalled      | chr14:70617704-70691256   | 71.553  |
| <b>Stat3</b>         | 520 | 0   | 8.667082 | 1577 | 26.283333 | 49.6181  | 9.840916 | Stalled      | chr11:100748123-100802825 | 52.703  |
| <b>Ptpns</b>         | 520 | 0   | 8.667082 | 359  | 5.9833333 | 3.80721  | 3.884451 | Stalled      | chr17:56551848-56617903   | 64.056  |
| <b>mmu-mir-29a</b>   | 520 | 0   | 8.667082 | 4730 | 78.833333 | ND       | ND       | Stalled      | chr6:30997688-31082102    | 84.415  |
| <b>A430084P05Rik</b> | 518 | 0   | 8.633747 | 127  | 2.116667  | 2.18566  | 3.214183 | Stalled      | chr11:70604433-70628063   | 21.631  |
| <b>Bcar3</b>         | 518 | 63  | 8.633747 | 6745 | 112.4167  | 36.3802  | 5.410724 | Stalled      | chr3:122120697-122233098  | 110.402 |
| <b>Tcx2</b>          | 517 | 0   | 8.61708  | 898  | 14.96667  | 1.70613  | 11.54806 | Stalled      | chr11:106363452-106476244 | 110.793 |
| <b>Mgat5</b>         | 517 | 0   | 8.61708  | 1969 | 32.81667  | 6.21227  | 12.08592 | Stalled      | chr1:129099562-129379549  | 277.988 |
| <b>Kcnn5</b>         | 516 | 72  | 8.600412 | 807  | 13.45     | 0.04701  | 13.69182 | Stalled      | chr14:20959279-21003004   | 41.726  |
| <b>Myo1c</b>         | 515 | 0   | 8.583745 | 1804 | 30.06667  | 35.7396  | 3.780473 | Stalled      | chr11:75463010-75488136   | 23.127  |
| <b>Slc2a6</b>        | 514 | 0   | 8.567077 | 887  | 14.783333 | 62.2112  | 2.001148 | Elongating   | chr2:26876884-26885518    | 6.635   |
| <b>BC013712</b>      | 514 | 66  | 8.567077 | 2039 | 33.983333 | 48.6913  | 2.180836 | Elongating   | chr4:132338271-132354279  | 14.009  |
| <b>Heg1</b>          | 513 | 0   | 8.55041  | 1665 | 27.75     | 5.73957  | 6.863754 | Stalled      | chr16:33682551-33768281   | 83.731  |
| <b>Bcr</b>           | 513 | 0   | 8.55041  | 696  | 11.6      | 3.63617  | 6.759596 | Stalled      | chr10:74521640-74647668   | 124.029 |
| <b>Pag1</b>          | 513 | 0   | 8.55041  | 2130 | 35.5      | 8.20912  | 14.31676 | Stalled      | chr3:9691897-9835630      | 141.734 |
| <b>Lat2</b>          | 512 | 0   | 8.533742 | 842  | 14.033333 | 51.126   | 5.081051 | Stalled      | chr5:135076134-135092893  | 14.76   |
| <b>Camk2d</b>        | 512 | 133 | 8.533742 | 3413 | 56.883333 | 16.3013  | 22.20996 | Stalled      | chr3:126297890-126547972  | 248.083 |
| <b>Cd97</b>          | 511 | 0   | 8.517075 | 1320 | 22        | 6.19234  | 1.824796 | Elongating   | chr8:86247149-86267210    | 18.062  |
| <b>IL17ra</b>        | 511 | 0   | 8.517075 | 791  | 13.183333 | 21.3975  | 5.44582  | Stalled      | chr6:120411214-120433744  | 20.531  |
| <b>Il6ra</b>         | 511 | 0   | 8.517075 | 633  | 10.55     | 5.35621  | 6.085227 | Stalled      | chr3:89673245-89719084    | 43.84   |
| <b>Cnp</b>           | 510 | 88  | 8.500407 | 811  | 13.51667  | 76.4159  | 1.974383 | Elongating   | chr11:100434252-100443052 | 6.801   |
| <b>Btbd19</b>        | 509 | 0   | 8.48374  | 833  | 13.883333 | 17.5092  | 1.051199 | Elongating   | chr4:116791822-116800330  | 6.509   |
| <b>Fcer2a</b>        | 509 | 0   | 8.48374  | 1290 | 21.5      | 182.918  | 0.88774  | Stalled      | chr8:3681736-3696174      | 12.439  |
| <b>Dedd2</b>         | 509 | 0   | 8.48374  | 318  | 5.3       | 14.8607  | 4.844369 | Stalled      | chr7:25987858-26006878    | 17.021  |
| <b>Fgd3</b>          | 507 | 0   | 8.450405 | 795  | 13.25     | 6.0114   | 5.368409 | Stalled      | chr13:49358478-49406577   | 46.1    |
| <b>Pde2a</b>         | 507 | 0   | 8.450405 | 371  | 6.1833333 | 4.74979  | 2.150001 | Unclassified | chr7:108568211-108661340  | 91.13   |
| <b>Slc23a2</b>       | 507 | 0   | 8.450405 | 1481 | 24.683333 | 11.0882  | 4.136167 | Stalled      | chr2:131878231-131972844  | 92.614  |
| <b>Csnk1g2</b>       | 506 | 0   | 8.433737 | 631  | 10.51667  | 36.1783  | 6.529788 | Stalled      | chr10:80083524-80103516   | 17.993  |
| <b>Scamp4</b>        | 504 | 0   | 8.400403 | 595  | 9.916667  | 0        | 6.276061 | Stalled      | chr10:80063626-80078528   | 12.903  |
| <b>Slc1a1</b>        | 504 | 0   | 8.400403 | 1135 | 18.91667  | 8.38524  | 8.152084 | Stalled      | chr15:76001404-76061927   | 58.524  |
| <b>Clk3</b>          | 502 | 0   | 8.367068 | 898  | 14.96667  | 29.1096  | 2.420165 | Elongating   | chr9:57598517-57615667    | 15.151  |
| <b>Fam83f</b>        | 501 | 0   | 8.3504   | 478  | 7.966667  | 1.36563  | 2.018395 | Elongating   | chr15:80500276-80530855   | 28.58   |
| <b>Polm</b>          | 500 | 0   | 8.333733 | 361  | 6.016667  | 6.9899   | 6.802992 | Stalled      | chr11:5727863-5740019     | 10.157  |
| <b>Txnp</b>          | 499 | 199 | 8.317065 | 204  | 3.4       | 35.4395  | 3.12779  | Stalled      | chr3:96359879-96365780    | 3.902   |
| <b>Zcchc24</b>       | 498 | 0   | 8.300398 | 611  | 10.183333 | 2.33176  | 3.875837 | Stalled      | chr14:26531125-26590342   | 57.218  |
| <b>Cd79b</b>         | 497 | 116 | 8.28373  | 468  | 7.8       | 500.876  | 1.984177 | Elongating   | chr11:106172654-106177843 | 3.19    |
| <b>Bmf</b>           | 495 | 0   | 8.250395 | 198  | 3.3       | 2.41219  | 1.097066 | Stalled      | chr2:118354492-118377414  | 20.923  |
| <b>Syvn1</b>         | 494 | 82  | 8.233728 | 1618 | 26.96667  | 70.24    | 2.39798  | Elongating   | chr19:6044575-6053717     | 7.143   |
| <b>9030617003Rik</b> | 494 | 0   | 8.233728 | 419  | 6.9833333 | 3.59923  | 20.07136 | Stalled      | chr12:102015332-102110820 | 93.489  |
| <b>Myo3b</b>         | 494 | 0   | 8.233728 | 987  | 16.45     | 0.206847 | 0.848221 | Unclassified | chr2:69875182-70267252    | 390.071 |
| <b>Gpr157</b>        | 493 | 0   | 8.21706  | 239  | 3.9833333 | 4.80178  | 9.174226 | Stalled      | chr4:149459611-149480036  | 18.426  |
| <b>Tcf7</b>          | 493 | 0   | 8.21706  | 186  | 3.1       | 0.720342 | 0.26693  | Stalled      | chr11:52066105-52097752   | 29.648  |
| <b>Pfxnd1</b>        | 493 | 0   | 8.21706  | 865  | 14.41667  | 13.6607  | 3.251176 | Stalled      | chr6:115904828-115947023  | 40.196  |
| <b>Usp36</b>         | 492 | 0   | 8.200393 | 1365 | 22.75     | 13.0657  | 7.87229  | Stalled      | chr11:118120967-118153558 | 30.592  |
| <b>Tbc1d22a</b>      | 491 | 0   | 8.183725 | 2077 | 34.61667  | 10.0085  | 31.42229 | Stalled      | chr15:86042888-86328933   | 284.046 |
| <b>Anks1</b>         | 490 | 0   | 8.167058 | 1048 | 17.46667  | 3.23201  | 9.389378 | Stalled      | chr17:28044284-28199581   | 153.298 |
| <b>Syng2</b>         | 489 | 0   | 8.150391 | 1218 | 20.3      | 391.45   | 1.476119 | Elongating   | chr11:117668980-117675600 | 4.621   |
| <b>Ets1</b>          | 489 | 137 | 8.150391 | 1871 | 31.183333 | 14.9727  | 12.1448  | Stalled      | chr9:32501626-32565405    | 61.78   |
| <b>Itpk1</b>         | 489 | 0   | 8.150391 | 1837 | 30.61667  | 8.58228  | 5.967717 | Stalled      | chr12:103806792-103945079 | 136.288 |
| <b>Cdc57</b>         | 488 | 0   | 8.133723 | 394  | 6.566667  | 1.71231  | 17.71945 | Stalled      | chr11:120687855-120796186 | 106.332 |
| <b>Sh3gl1</b>        | 487 | 0   | 8.117056 | 1410 | 23.5      | 30.0898  | 3.043941 | Stalled      | chr17:56156172-56177999   | 19.828  |
| <b>Chd7</b>          | 487 | 0   | 8.117056 | 2877 | 47.95     | 7.95518  | 5.042882 | Stalled      | chr4:8616067-8793956      | 175.89  |
| <b>Katnb1</b>        | 486 | 0   | 8.100388 | 147  | 2.45      | 6.15859  | 9.659936 | Stalled      | chr8:97603100-97623774    | 18.675  |
| <b>Slc24a1</b>       | 486 | 0   | 8.100388 | 622  | 10.36667  | 0.100539 | 0        | Stalled      | chr9:64770667-64801414    | 28.748  |
| <b>Snx20</b>         | 485 | 10  | 8.083721 | 795  | 13.25     | 82.783   | 2.64572  | Elongating   | chr8:91150726-91162027    | 9.302   |
| <b>Xrcc3</b>         | 484 | 0   | 8.067053 | 963  | 16.05     | 10.977   | 1.994191 | Elongating   | chr12:113041403-113054052 | 10.65   |
| <b>Lsm4</b>          | 483 | 0   | 8.050386 | 631  | 10.51667  | 146.385  | 1.971402 | Elongating   | chr8:73195129-73202651    | 5.523   |
| <b>Ggta1</b>         | 482 | 98  | 8.033718 | 2152 | 35.86667  | 10.9651  | 5.201579 | Stalled      | chr2:35255699-35318945    | 61.247  |
| <b>Myo9b</b>         | 482 | 0   | 8.033718 | 1917 | 31.95     | 16.3727  | 14.19611 | Stalled      | chr8:73794612-73884611    | 88      |
| <b>Sbf1</b>          | 479 | 0   | 7.983716 | 417  | 6.95      | 17.6894  | 12.41782 | Stalled      | chr15:89118667-89147742   | 27.076  |
| <b>A830007P12Rik</b> | 478 | 0   | 7.967048 | 497  | 8.2833333 | 18.4599  | 1.511507 | Elongating   | chr2:25048239-25054133    | 3.895   |
| <b>Stat1</b>         | 478 | 0   | 7.967048 | 1712 | 28.533333 | 20.5141  | 4.34724  | Stalled      | chr1:52174281-52218707    | 42.427  |
| <b>Ttc25</b>         | 476 | 0   | 7.933713 | 211  | 3.516667  | 0.777712 | 14.77766 | Stalled      | chr11:100404945-100433880 | 26.936  |
| <b>Inpp5a</b>        | 476 | 0   | 7.933713 | 1287 | 21.45     | 2.43625  | 11.8101  | Stalled      | chr7:146573007-146765551  | 190.545 |
| <b>Rnf167</b>        | 475 | 36  | 7.917046 | 1116 | 18.6      | 28.234   | 0.939952 | Elongating   | chr11:70459090-70464916   | 3.827   |
| <b>Aldh3b1</b>       | 475 | 0   | 7.917046 | 486  | 8.1       | 17.8325  | 1.245557 | Elongating   | chr19:3913490-3931716     | 16.227  |
| <b>Zfp423</b>        | 475 | 0   | 7.917046 | 1006 | 16.76667  | 0.135671 | 0.911237 | Unclassified | chr8:90185708-90485494    | 297.787 |
| <b>Abi3</b>          | 474 | 0   | 7.900379 | 327  | 5.45      | 8.87318  | 6.921479 | Stalled      | chr11:95691385-95705753   | 12.369  |
| <b>Sidt2</b>         | 473 | 0   | 7.883711 | 794  | 13.233333 | 23.6644  | 5.1126   | Stalled      | chr9:45745957-45765332    | 17.376  |



|                       |     |     |          |       |          |          |          |              |                           |         |
|-----------------------|-----|-----|----------|-------|----------|----------|----------|--------------|---------------------------|---------|
| <b>Pati2</b>          | 473 | 0   | 7.883711 | 2966  | 49.43333 | 0.052655 | 0        | Stalled      | chr2:121945843-122013925  | 66.083  |
| <b>Tmem108</b>        | 473 | 0   | 7.883711 | 1393  | 23.21667 | 2.36964  | 7.615299 | Stalled      | chr9:103386768-103666130  | 277.363 |
| <b>Gimap1</b>         | 472 | 105 | 7.867044 | 986   | 16.43333 | 92.9775  | 1.462491 | Elongating   | chr6:48687045-48693794    | 4.75    |
| <b>Gnai2</b>          | 472 | 0   | 7.867044 | 1151  | 19.18333 | 189.772  | 5.072177 | Stalled      | chr9:107516468-107539673  | 21.206  |
| <b>Strn4</b>          | 472 | 0   | 7.867044 | 788   | 13.13333 | 16.1204  | 2.812764 | Elongating   | chr7:17399237-17426279    | 25.043  |
| <b>Mapre2</b>         | 472 | 71  | 7.867044 | 1667  | 27.78333 | 32.0766  | 13.16264 | Stalled      | chr18:23960470-24052362   | 89.893  |
| <b>Camk2a</b>         | 471 | 0   | 7.850376 | 788   | 13.13333 | 3.37545  | 3.910656 | Stalled      | chr18:61083285-61147806   | 62.522  |
| <b>Mef2d</b>          | 470 | 0   | 7.833709 | 1437  | 23.95    | 28.3597  | 4.598806 | Stalled      | chr3:87944316-87973089    | 26.774  |
| <b>Tor3a</b>          | 469 | 0   | 7.817041 | 1375  | 22.91667 | 20.308   | 4.525397 | Stalled      | chr1:158583747-158606470  | 20.724  |
| <b>Kdm6b</b>          | 468 | 0   | 7.800374 | 1155  | 19.25    | 3.32957  | 0.121104 | Stalled      | chr11:69212019-69229177   | 15.159  |
| <b>Grb2</b>           | 468 | 0   | 7.800374 | 3405  | 56.75    | 92.7981  | 5.214043 | Stalled      | chr11:115505457-115571911 | 64.455  |
| <b>Rap1gap2</b>       | 467 | 0   | 7.783706 | 834   | 13.9     | 1.57111  | 1.384795 | Unclassified | chr11:74196984-74405660   | 206.677 |
| <b>Tap1</b>           | 466 | 0   | 7.767039 | 1080  | 18       | 102.38   | 4.834608 | Stalled      | chr17:34322500-34334170   | 9.671   |
| <b>Hip1r</b>          | 466 | 0   | 7.767039 | 1634  | 27.23333 | 36.2276  | 3.198248 | Stalled      | chr5:124421636-124453223  | 29.588  |
| <b>Rgs10</b>          | 466 | 0   | 7.767039 | 225   | 3.75     | 5.18471  | 4.702758 | Stalled      | chr7:135517138-135563686  | 44.549  |
| <b>D4300042009Rik</b> | 466 | 0   | 7.767039 | 534   | 8.9      | 1.74485  | 50.49355 | Stalled      | chr7:132849389-133018311  | 166.923 |
| <b>Ccr7</b>           | 465 | 0   | 7.750371 | 447   | 7.45     | 18.0689  | 3.632989 | Stalled      | chr11:99005512-99018391   | 10.88   |
| <b>Jag2</b>           | 465 | 0   | 7.750371 | 128   | 2.133333 | 2.02611  | 0.942139 | Stalled      | chr12:114146800-114169706 | 20.907  |
| <b>Gimap5</b>         | 464 | 121 | 7.733704 | 896   | 14.93333 | 45.3107  | 4.638944 | Stalled      | chr6:48694195-48704199    | 8.005   |
| <b>Qprt</b>           | 464 | 0   | 7.733704 | 102   | 1.7      | 0.214141 | 0.115052 | Stalled      | chr7:134251283-134267543  | 14.261  |
| <b>Xylt1</b>          | 461 | 0   | 7.683702 | 3518  | 58.63333 | 5.05892  | 4.956577 | Stalled      | chr7:124522492-124811144  | 286.653 |
| <b>Ranbp3</b>         | 460 | 0   | 7.667034 | 1301  | 21.68333 | 31.966   | 8.520087 | Stalled      | chr17:56810679-56851192   | 38.514  |
| <b>Tspan18</b>        | 460 | 0   | 7.667034 | 742   | 12.36667 | 0.283473 | 1.206131 | Stalled      | chr2:93041916-93176644    | 132.729 |
| <b>Hist1h1e</b>       | 459 | 168 | 7.650367 | 325   | 5.416667 | 0        | 1.896671 | Unclassified | chr13:23712497-23716427   | 1.931   |
| <b>Cyba</b>           | 459 | 0   | 7.650367 | 750   | 12.5     | 314.713  | 5.890825 | Stalled      | chr8:124948670-124958840  | 8.171   |
| <b>Rassf5</b>         | 459 | 0   | 7.650367 | 1011  | 16.85    | 9.99188  | 2.073111 | Elongating   | chr1:133072986-133143755  | 68.77   |
| <b>Aicda</b>          | 456 | 81  | 7.600364 | 2690  | 44.83333 | 73.0521  | 1.847257 | Elongating   | chr6:122501826-122514198  | 10.373  |
| <b>Smarcb1</b>        | 456 | 0   | 7.600364 | 719   | 11.98333 | 39.3718  | 10.46531 | Stalled      | chr10:75359513-75386359   | 24.847  |
| <b>Mkl1</b>           | 455 | 0   | 7.583697 | 1946  | 32.43333 | 16.2155  | 12.11894 | Stalled      | chr15:80842710-81023187   | 178.478 |
| <b>Pfkfb3</b>         | 454 | 0   | 7.567029 | 375   | 6.25     | 7.9357   | 7.982784 | Stalled      | chr2:11393061-11425694    | 30.634  |
| <b>Synj2</b>          | 454 | 0   | 7.567029 | 495   | 8.25     | 2.08119  | 5.980483 | Stalled      | chr17:5939279-6044290     | 103.012 |
| <b>Mef2b</b>          | 453 | 0   | 7.550362 | 671   | 11.18333 | 33.4439  | 5.246796 | Stalled      | chr8:72674676-72691387    | 14.712  |
| <b>Tm6sf1</b>         | 453 | 0   | 7.550362 | 365   | 6.083333 | 7.711    | 4.944994 | Stalled      | chr7:89001907-89028954    | 25.048  |
| <b>Epb4.111</b>       | 453 | 0   | 7.550362 | 222   | 3.7      | 0.197623 | 1.412316 | Unclassified | chr2:156244787-156368950  | 122.164 |
| <b>Ralgps1</b>        | 453 | 0   | 7.550362 | 763   | 12.71667 | 2.26049  | 12.18493 | Stalled      | chr2:32992492-33228998    | 234.507 |
| <b>Ubash3a</b>        | 452 | 0   | 7.533694 | 188   | 3.133333 | 0.121523 | 0.451872 | Stalled      | chr17:31343010-31379348   | 34.339  |
| <b>Nudcd3</b>         | 452 | 0   | 7.533694 | 1118  | 18.63333 | 18.8637  | 14.85601 | Stalled      | chr11:6005695-6102454     | 94.76   |
| <b>Dock10</b>         | 452 | 76  | 7.533694 | 10443 | 174.05   | 37.6661  | 8.078376 | Stalled      | chr1:80497647-80757128    | 257.482 |
| <b>Tmc8</b>           | 451 | 0   | 7.517027 | 794   | 13.23333 | 34.1691  | 4.395053 | Stalled      | chr11:117642363-117654342 | 9.98    |
| <b>Mgrn1</b>          | 450 | 0   | 7.500359 | 898   | 14.96667 | 19.7428  | 6.293037 | Stalled      | chr16:4884251-4938296     | 52.046  |
| <b>Itsn1</b>          | 450 | 0   | 7.500359 | 681   | 11.35    | 3.7018   | 21.3962  | Stalled      | chr16:91727615-91920824   | 191.21  |
| <b>Selpg</b>          | 449 | 0   | 7.483692 | 1183  | 19.71667 | 46.151   | 7.220682 | Stalled      | chr5:114267806-114282510  | 12.705  |
| <b>Sic1a2</b>         | 448 | 0   | 7.467024 | 650   | 10.83333 | 0.93599  | 0.167843 | Stalled      | chr2:102496839-102630941  | 132.103 |
| <b>Rhof</b>           | 447 | 49  | 7.450357 | 761   | 12.68333 | 35.3981  | 4.637372 | Stalled      | chr5:123568188-123584638  | 14.451  |
| <b>Ahrgef1</b>        | 446 | 56  | 7.43369  | 1213  | 20.21667 | 87.4519  | 7.025768 | Stalled      | chr7:25686004-25711610    | 23.607  |
| <b>Plxna1</b>         | 446 | 0   | 7.43369  | 470   | 7.833333 | 1.89815  | 4.131685 | Stalled      | chr6:89266309-89314607    | 46.299  |
| <b>Wsf2</b>           | 446 | 0   | 7.43369  | 1513  | 25.21667 | 19.3674  | 9.035637 | Stalled      | chr4:132684547-132754245  | 67.699  |
| <b>Tbxas1</b>         | 446 | 0   | 7.43369  | 1338  | 22.3     | 5.34428  | 2.738512 | Elongating   | chr6:38866984-39034578    | 165.595 |
| <b>Akap13</b>         | 446 | 70  | 7.43369  | 2537  | 42.28333 | 6.73619  | 17.66334 | Stalled      | chr7:82598419-82899495    | 299.077 |
| <b>Bid</b>            | 445 | 92  | 7.417022 | 1363  | 22.71667 | 17.3219  | 5.046192 | Stalled      | chr6:120843136-120868838  | 23.703  |
| <b>Herpud1</b>        | 444 | 99  | 7.400355 | 678   | 11.3     | 54.1396  | 7.758464 | Stalled      | chr8:96908399-96919258    | 8.86    |
| <b>Gm5544</b>         | 444 | 0   | 7.400355 | 318   | 5.3      | 0.043153 | 0.303919 | Stalled      | chr3:97732095-97770941    | 36.847  |
| <b>Hivep2</b>         | 444 | 0   | 7.400355 | 909   | 15.15    | 1.26706  | 15.48772 | Stalled      | chr10:13684184-13871184   | 185.001 |
| <b>Uba7</b>           | 443 | 0   | 7.383687 | 617   | 10.28333 | 20.4443  | 1.487426 | Elongating   | chr9:107875897-107886387  | 8.491   |
| <b>Pik3r2</b>         | 443 | 0   | 7.383687 | 575   | 9.583333 | 14.7494  | 2.728537 | Stalled      | chr8:73292079-73302611    | 8.533   |
| <b>mmu-mir-34a</b>    | 443 | 0   | 7.383687 | 901   | 15.01667 | ND       | ND       | Stalled      | chr4:149425095-149456128  | 31.034  |
| <b>Cib1</b>           | 442 | 0   | 7.36702  | 403   | 6.716667 | 45.6419  | 3.041599 | Stalled      | chr7:87372045-87379502    | 5.458   |
| <b>Tnfrsf13b</b>      | 442 | 0   | 7.36702  | 1857  | 30.95    | 62.0562  | 0.39292  | Stalled      | chr11:60952336-60961144   | 6.809   |
| <b>Fam105b</b>        | 442 | 0   | 7.36702  | 1524  | 25.4     | 43.3664  | 6.23621  | Stalled      | chr15:27535675-27562448   | 24.774  |
| <b>Ralgps2</b>        | 442 | 108 | 7.36702  | 2323  | 38.71667 | 10.4264  | 15.37503 | Stalled      | chr1:158734297-158871757  | 135.461 |
| <b>Hmha1</b>          | 441 | 0   | 7.350352 | 798   | 13.3     | 101.796  | 3.332092 | Stalled      | chr10:79477416-79494216   | 14.801  |
| <b>Scn4a</b>          | 441 | 0   | 7.350352 | 649   | 10.81667 | 14.2168  | 0.0439   | Stalled      | chr11:106179906-106212704 | 30.799  |
| <b>Coro1c</b>         | 441 | 0   | 7.350352 | 907   | 15.11667 | 19.7569  | 11.88212 | Stalled      | chr5:114292447-114360715  | 66.269  |
| <b>Rreb1</b>          | 441 | 0   | 7.350352 | 2823  | 47.05    | 5.04789  | 12.54761 | Stalled      | chr13:37915906-38043871   | 125.966 |
| <b>Map3k5</b>         | 441 | 51  | 7.350352 | 1945  | 32.41667 | 6.70291  | 14.53896 | Stalled      | chr10:19652331-19862556   | 208.226 |
| <b>Syt2</b>           | 440 | 0   | 7.333685 | 229   | 3.816667 | 0.526023 | 1.230436 | Unclassified | chr1:136541257-136645994  | 102.738 |
| <b>Adam19</b>         | 439 | 65  | 7.317017 | 2153  | 35.88333 | 20.1947  | 6.081915 | Stalled      | chr11:45867488-45960844   | 91.357  |
| <b>2310014H01Rik</b>  | 438 | 0   | 7.30035  | 1101  | 18.35    | 79.0162  | 2.15747  | Elongating   | chr17:36000539-36012541   | 10.003  |
| <b>mmu-mir-155</b>    | 438 | 0   | 7.30035  | 3243  | 54.05    | ND       | ND       | Stalled      | chr16:84705128-84719542   | 14.415  |
| <b>Txnrc11</b>        | 438 | 0   | 7.30035  | 1057  | 17.61667 | 17.5823  | 28.63829 | Stalled      | chr16:11075003-11136625   | 59.623  |
| <b>Pnk4</b>           | 438 | 53  | 7.30035  | 611   | 10.18333 | 17.4265  | 13.9575  | Stalled      | chr1:74329607-74400266    | 68.66   |
| <b>Sipa1l3</b>        | 438 | 0   | 7.30035  | 2259  | 37.65    | 3.81608  | 1.959075 | Elongating   | chr7:30105396-30292479    | 185.084 |
| <b>Mybbp1a</b>        | 437 | 56  | 7.283682 | 984   | 16.4     | 72.4254  | 3.565502 | Stalled      | chr11:72252879-72265052   | 10.174  |
| <b>Pgls</b>           | 436 | 0   | 7.267015 | 209   | 3.483333 | 80.1073  | 5.469317 | Stalled      | chr8:74114082-74120166    | 4.085   |
| <b>Tmc6</b>           | 436 | 0   | 7.267015 | 806   | 13.43333 | 26.5666  | 4.325842 | Stalled      | chr11:117627299-117643935 | 14.637  |
| <b>Adamts7</b>        | 436 | 0   | 7.267015 | 83    | 1.383333 | 0.611262 | 1.516294 | Unclassified | chr9:90055815-90094940    | 37.126  |
| <b>Agpat4</b>         | 436 | 0   | 7.267015 | 1240  | 20.66667 | 10.8545  | 15.57849 | Stalled      | chr17:12310149-12412506   | 100.358 |
| <b>Trn</b>            | 435 | 0   | 7.250347 | 499   | 8.316667 | 52.5213  | 0.630831 | Stalled      | chr11:102289635-102298121 | 6.487   |
| <b>Gbc1d9b</b>        | 434 | 0   | 7.23368  | 563   | 9.383333 | 7.99507  | 9.44639  | Stalled      | chr11:49942861-49986287   | 41.427  |
| <b>Wdr51b</b>         | 433 | 0   | 7.217012 | 831   | 13.85    | 6.01012  | 14.24121 | Stalled      | chr10:98567804-98660622   | 90.819  |
| <b>Gimap6</b>         | 432 | 18  | 7.200345 | 794   | 13.23333 | 130.237  | 0.665683 | Stalled      | chr6:48651581-48660243    | 6.663   |
| <b>Atxn1</b>          | 431 | 0   | 7.183678 | 3800  | 63.33333 | 1.767    | 18.2719  | Stalled      | chr13:45650261-46062345   | 101.085 |
| <b>Foxj2</b>          | 430 | 0   | 7.16701  | 328   | 5.466667 | 5.00071  | 7.55297  | Stalled      | chr6:122768201-122795382  | 25.182  |
| <b>Moy1g</b>          | 428 | 0   | 7.133675 | 1312  | 21.86667 | 106.439  | 2.519474 | Elongating   | chr11:6406551-6422961     | 14.411  |
| <b>Ppcdc</b>          | 428 | 53  | 7.133675 | 782   | 13.03333 | 7.95759  | 5.79132  | Stalled      | chr9:57260470-57289921    | 27.452  |
| <b>Mami3</b>          | 428 | 0   | 7.133675 | 2312  | 38.53333 | 2.92387  | 8.241196 | Stalled      | chr3:51491536-51910928    | 417.393 |

|                      |     |     |          |      |          |          |          |              |                           |         |
|----------------------|-----|-----|----------|------|----------|----------|----------|--------------|---------------------------|---------|
| <b>Mnt</b>           | 427 | 0   | 7.117008 | 1242 | 20.7     | 8.17286  | 2.187283 | Elongating   | chr11:74642425-74659227   | 14.803  |
| <b>Fhad1</b>         | 427 | 0   | 7.117008 | 872  | 14.53333 | 2.66894  | 0.36234  | Stalled      | chr4:141446765-141569552  | 120.788 |
| <b>Man1a</b>         | 427 | 81  | 7.117008 | 6437 | 107.2833 | 60.1211  | 12.39085 | Stalled      | chr10:53625838-53797602   | 169.765 |
| <b>Wdr6</b>          | 426 | 0   | 7.10034  | 309  | 5.15     | 27.8838  | 4.091373 | Stalled      | chr9:108474643-108483001  | 6.359   |
| <b>Zfp335</b>        | 426 | 0   | 7.10034  | 992  | 16.53333 | 14.3148  | 5.83976  | Stalled      | chr2:164717391-164739250  | 19.86   |
| <b>Slc7a1</b>        | 425 | 0   | 7.083673 | 3086 | 51.43333 | 17.5953  | 7.698708 | Stalled      | chr5:149138985-149213480  | 72.496  |
| <b>Sh3pxd2a</b>      | 424 | 39  | 7.067005 | 1343 | 22.38333 | 2.92896  | 5.126172 | Stalled      | chr19:47334664-47540901   | 204.238 |
| <b>Ppp1r10</b>       | 423 | 157 | 7.050338 | 1578 | 26.3     | 16.0484  | 6.3991   | Stalled      | chr17:36051855-36069226   | 15.372  |
| <b>Dus2l</b>         | 423 | 0   | 7.050338 | 413  | 6.883333 | 7.67544  | 18.91492 | Stalled      | chr8:108533406-108577719  | 42.314  |
| <b>BC057022</b>      | 423 | 0   | 7.050338 | 739  | 12.31667 | 1.41809  | 0.842351 | Stalled      | chr5:115016259-115063227  | 94.969  |
| <b>Abtb2</b>         | 423 | 55  | 7.050338 | 1472 | 24.53333 | 4.09075  | 18.89967 | Stalled      | chr2:103404466-103558580  | 152.115 |
| <b>Paqr5</b>         | 422 | 0   | 7.03367  | 240  | 4        | 0.128163 | 1.154512 | Unclassified | chr9:61801544-61876597    | 73.054  |
| <b>Vps8</b>          | 422 | 0   | 7.03367  | 758  | 12.63333 | 2.12657  | 30.6538  | Stalled      | chr16:21421190-21644753   | 221.564 |
| <b>Pptc7</b>         | 421 | 0   | 7.017003 | 1480 | 24.66667 | 15.7811  | 3.78895  | Stalled      | chr5:122732406-122774290  | 39.885  |
| <b>Rps6ka1</b>       | 421 | 0   | 7.017003 | 1059 | 17.65    | 34.6023  | 3.956359 | Stalled      | chr4:133403205-133445714  | 40.51   |
| <b>Ptbp1</b>         | 420 | 0   | 7.000335 | 1344 | 22.4     | 90.9108  | 4.340494 | Stalled      | chr10:79315349-79327178   | 9.83    |
| <b>Rcsd1</b>         | 420 | 0   | 7.000335 | 1858 | 30.96667 | 47.2843  | 2.761651 | Elongating   | chr1:167579075-167640225  | 59.151  |
| <b>Mys1e</b>         | 420 | 0   | 7.000335 | 3111 | 51.85    | 17.721   | 8.823423 | Stalled      | chr9:70053156-70247874    | 192.719 |
| <b>Ebf1</b>          | 420 | 61  | 7.000335 | 6079 | 101.3167 | 10.616   | 5.792057 | Stalled      | chr11:44429635-44818674   | 387.04  |
| <b>BC046404</b>      | 418 | 0   | 6.967001 | 2396 | 39.93333 | 2.90621  | 1.556215 | Elongating   | chr11:62418385-62464025   | 43.641  |
| <b>Cd19</b>          | 417 | 0   | 6.950333 | 576  | 9.6      | 277.246  | 3.022538 | Stalled      | chr7:133551961-133560384  | 6.424   |
| <b>Arsg</b>          | 416 | 0   | 6.933666 | 581  | 9.683333 | 0.498422 | 60.68671 | Stalled      | chr11:109332687-109434641 | 99.955  |
| <b>Tmem49</b>        | 416 | 249 | 6.933666 | 1917 | 31.95    | 23.7371  | 13.20462 | Stalled      | chr11:86397366-86499324   | 99.959  |
| <b>St3gal6</b>       | 415 | 99  | 6.916998 | 1058 | 17.63333 | 10.2786  | 6.577794 | Stalled      | chr16:58470654-58525425   | 52.772  |
| <b>Prr7</b>          | 414 | 0   | 6.900331 | 338  | 5.633333 | 4.82939  | 5.839544 | Stalled      | chr13:55563627-55574516   | 8.89    |
| <b>Sh2d5</b>         | 414 | 0   | 6.900331 | 60   | 1        | 0.579592 | 5.359493 | Stalled      | chr4:137804325-137816883  | 10.559  |
| <b>BC006779</b>      | 414 | 0   | 6.900331 | 1141 | 19.01667 | 36.8678  | 2.091555 | Elongating   | chr2:180962319-180978732  | 14.414  |
| <b>Sufu</b>          | 414 | 0   | 6.900331 | 1148 | 19.13333 | 11.1907  | 13.27489 | Stalled      | chr19:46469407-46561150   | 89.744  |
| <b>Atxn2</b>         | 414 | 0   | 6.900331 | 1026 | 17.1     | 3.94869  | 40.45311 | Stalled      | chr5:122159617-122264959  | 103.343 |
| <b>Xbp1</b>          | 413 | 315 | 6.883663 | 1283 | 21.38333 | 183.725  | 2.319475 | Elongating   | chr11:5418969-5425875     | 4.907   |
| <b>Rnf41</b>         | 413 | 0   | 6.883663 | 304  | 5.066667 | 5.19296  | 20.95958 | Stalled      | chr10:127846671-127878496 | 29.826  |
| <b>Ano10</b>         | 413 | 0   | 6.883663 | 496  | 8.266667 | 4.28978  | 28.72801 | Stalled      | chr9:122084996-122205492  | 118.497 |
| <b>Fbxl22</b>        | 412 | 0   | 6.866996 | 953  | 15.88333 | 1.86024  | 0.385949 | Stalled      | chr9:66356265-66364400    | 6.136   |
| <b>Tbc1d10c</b>      | 412 | 0   | 6.866996 | 374  | 6.233333 | 60.7023  | 2.278647 | Elongating   | chr19:4184356-4193047     | 6.692   |
| <b>Cltc</b>          | 412 | 77  | 6.866996 | 1897 | 31.61667 | 80.5302  | 15.91138 | Stalled      | chr11:86508154-86572994   | 62.841  |
| <b>Ptpr</b>          | 412 | 0   | 6.866996 | 1186 | 19.76667 | 2.25839  | 1.105925 | Stalled      | chr7:142727506-142877977  | 148.472 |
| <b>Ccnd2</b>         | 411 | 0   | 6.850328 | 5657 | 94.28333 | 36.0815  | 2.390682 | Elongating   | chr6:127075726-127103066  | 25.341  |
| <b>Gna12</b>         | 411 | 0   | 6.850328 | 348  | 5.8      | 9.8694   | 9.988036 | Stalled      | chr5:141235897-141308385  | 70.489  |
| <b>Itp2</b>          | 411 | 0   | 6.850328 | 1686 | 28.1     | 3.72041  | 42.40659 | Stalled      | chr6:146060001-146452434  | 390.434 |
| <b>Pik3r5</b>        | 410 | 0   | 6.833661 | 868  | 14.46667 | 8.01386  | 7.633059 | Stalled      | chr11:68243626-68311348   | 65.723  |
| <b>Rbm47</b>         | 410 | 0   | 6.833661 | 1074 | 17.9     | 1.42567  | 2.223973 | Elongating   | chr5:66407795-66545163    | 135.369 |
| <b>Brunol4</b>       | 410 | 33  | 6.833661 | 1023 | 17.05    | 0.648305 | 0.212086 | Unclassified | chr18:25636120-25914484   | 276.365 |
| <b>Clec2g</b>        | 409 | 0   | 6.816993 | 1801 | 30.01667 | 0.480055 | 0.346568 | Stalled      | chr6:128882398-128934725  | 50.328  |
| <b>Mmwd</b>          | 408 | 0   | 6.800326 | 57   | 0.95     | 4.20557  | 2.406299 | Elongating   | chr7:19659548-19668124    | 6.577   |
| <b>Dap4k1</b>        | 408 | 47  | 6.800326 | 1771 | 29.51667 | 88.4289  | 4.036175 | Stalled      | chr7:29765872-29788297    | 20.426  |
| <b>Sh3tc1</b>        | 408 | 0   | 6.800326 | 441  | 7.35     | 2.99708  | 12.31805 | Stalled      | chr5:36039828-36073925    | 32.098  |
| <b>Alpl</b>          | 408 | 0   | 6.800326 | 1553 | 25.88333 | 44.4482  | 5.876756 | Stalled      | chr4:137297646-137354292  | 54.647  |
| <b>St6galnc5</b>     | 408 | 0   | 6.800326 | 321  | 5.35     | 0.080135 | 0.999996 | Unclassified | chr3:152483673-152647171  | 161.499 |
| <b>Cdk6</b>          | 408 | 0   | 6.800326 | 1016 | 16.93333 | 2.7988   | 11.12286 | Stalled      | chr5:3342311-3522225      | 177.915 |
| <b>Limd2</b>         | 407 | 0   | 6.783658 | 579  | 9.65     | 102.599  | 2.034893 | Elongating   | chr11:106017569-106023456 | 3.888   |
| <b>Cish</b>          | 406 | 0   | 6.766991 | 1167 | 19.45    | 36.8655  | 1.868297 | Elongating   | chr9:107197019-107204292  | 5.274   |
| <b>Chst12</b>        | 403 | 0   | 6.716989 | 590  | 9.833333 | 15.9825  | 6.734491 | Stalled      | chr5:140979562-141001192  | 19.631  |
| <b>Zfp180</b>        | 402 | 0   | 6.700321 | 331  | 5.516667 | 6.88491  | 23.43448 | Stalled      | chr7:24864962-24892234    | 25.273  |
| <b>Hdac5</b>         | 402 | 0   | 6.700321 | 662  | 11.03333 | 11.6513  | 4.326018 | Stalled      | chr11:102057060-102093486 | 34.427  |
| <b>Padi2</b>         | 402 | 0   | 6.700321 | 363  | 6.05     | 2.45076  | 1.440283 | Stalled      | chr4:140460274-140508501  | 46.228  |
| <b>Atf4</b>          | 401 | 64  | 6.683654 | 592  | 9.866667 | 96.5117  | 1.96054  | Stalled      | chr15:80083613-80087971   | 2.359   |
| <b>Dnm1</b>          | 401 | 0   | 6.683654 | 144  | 2.4      | 0.392607 | 3.267176 | Unclassified | chr2:32163990-32210824    | 44.835  |
| <b>Unc84b</b>        | 400 | 0   | 6.666986 | 742  | 12.36667 | 18.0984  | 5.403259 | Stalled      | chr15:79554499-79574960   | 18.462  |
| <b>Sema4a</b>        | 399 | 0   | 6.650319 | 206  | 3.433333 | 3.11653  | 1.087242 | Stalled      | chr3:88239883-88261683    | 19.801  |
| <b>Mx11</b>          | 399 | 0   | 6.650319 | 534  | 8.9      | 3.17546  | 5.911407 | Stalled      | chr19:53382995-53450300   | 65.306  |
| <b>Plekho1</b>       | 398 | 63  | 6.633651 | 344  | 5.733333 | 67.3093  | 2.108917 | Elongating   | chr3:95792762-95801762    | 7.001   |
| <b>Egln2</b>         | 398 | 0   | 6.633651 | 627  | 10.45    | 50.6791  | 5.374995 | Stalled      | chr7:27943676-27953731    | 8.056   |
| <b>Rrp1b</b>         | 398 | 0   | 6.633651 | 1208 | 20.13333 | 15.4931  | 8.479125 | Stalled      | chr17:32171106-32199807   | 26.702  |
| <b>Baiap2</b>        | 398 | 0   | 6.633651 | 289  | 4.816667 | 3.37516  | 38.8603  | Stalled      | chr11:119802405-119868096 | 63.692  |
| <b>Shisa5</b>        | 397 | 0   | 6.616984 | 620  | 10.33333 | 320.678  | 1.935069 | Elongating   | chr9:108955424-108960280  | 2.857   |
| <b>Mta3</b>          | 397 | 0   | 6.616984 | 1301 | 21.68333 | 13.591   | 12.77255 | Stalled      | chr17:84103502-84214245   | 108.744 |
| <b>Napa</b>          | 396 | 0   | 6.600316 | 583  | 9.716667 | 31.4521  | 6.79902  | Stalled      | chr7:16681991-16703324    | 19.334  |
| <b>Klhl18</b>        | 395 | 0   | 6.583649 | 582  | 9.7      | 7.49639  | 12.52581 | Stalled      | chr9:110328429-110381198  | 50.77   |
| <b>Tmprss6</b>       | 394 | 0   | 6.566981 | 283  | 4.716667 | 0.152464 | 0.179883 | Stalled      | chr15:78270096-78301064   | 28.969  |
| <b>Milt1</b>         | 394 | 0   | 6.566981 | 764  | 12.73333 | 14.9321  | 4.355333 | Stalled      | chr17:57032033-57076811   | 42.779  |
| <b>Gas7</b>          | 394 | 89  | 6.566981 | 606  | 10.1     | 0.890048 | 0.814701 | Unclassified | chr11:67344499-67502494   | 155.996 |
| <b>Zbtb32</b>        | 393 | 0   | 6.550314 | 333  | 5.55     | 113.391  | 2.092477 | Stalled      | chr7:31374699-31379961    | 3.263   |
| <b>Fam117a</b>       | 393 | 65  | 6.550314 | 543  | 9.05     | 8.89155  | 12.62918 | Stalled      | chr11:95196331-95243185   | 44.855  |
| <b>4632428N05Rik</b> | 391 | 0   | 6.516979 | 545  | 9.083333 | 8.67609  | 2.571385 | Elongating   | chr10:59807598-59835432   | 25.835  |
| <b>Nedd9</b>         | 391 | 87  | 6.516979 | 3953 | 65.88333 | 24.6079  | 11.36338 | Stalled      | chr13:41405284-41584689   | 177.406 |
| <b>Lyl1</b>          | 390 | 0   | 6.500311 | 649  | 10.81667 | 69.2346  | 1.985827 | Elongating   | chr8:87223355-87228615    | 3.261   |
| <b>Lif</b>           | 390 | 0   | 6.500311 | 177  | 2.95     | 0.301194 | 0.438276 | Stalled      | chr11:4155570-4172517     | 14.948  |
| <b>Cacna1</b>        | 390 | 0   | 6.500311 | 876  | 14.6     | 2.48544  | 0.669674 | Stalled      | chr15:80115667-80228722   | 111.056 |
| <b>Leng8</b>         | 389 | 0   | 6.483644 | 678  | 11.3     | 34.5684  | 6.205639 | Stalled      | chr7:4086657-4099775      | 11.119  |
| <b>5930434B04Rik</b> | 389 | 0   | 6.483644 | 812  | 13.53333 | 6.04086  | 1.52714  | Elongating   | chr2:26863485-26876609    | 11.125  |
| <b>Irf5</b>          | 388 | 0   | 6.466977 | 880  | 14.66667 | 46.8529  | 2.953178 | Stalled      | chr6:29474732-29487319    | 10.588  |
| <b>Poir3h</b>        | 387 | 0   | 6.450309 | 537  | 8.95     | 14.4121  | 2.847858 | Stalled      | chr15:81745459-81758643   | 11.185  |
| <b>Cables2</b>       | 387 | 0   | 6.450309 | 939  | 15.65    | 6.20217  | 1.856233 | Elongating   | chr7:179993243-180010170  | 14.928  |
| <b>Mapk8ip3</b>      | 387 | 0   | 6.450309 | 949  | 15.81667 | 20.2807  | 12.35035 | Stalled      | chr17:25034451-25075922   | 39.472  |
| <b>Ampd3</b>         | 387 | 0   | 6.450309 | 162  | 2.7      | 0.523989 | 0.386398 | Unclassified | chr7:117914117-117955909  | 39.793  |
| <b>A530032D15Rik</b> | 386 | 177 | 6.433642 | 383  | 6.383333 | 21.5037  | 1.693339 | Elongating   | chr1:85084713-85108428    | 21.716  |

|                     |     |     |          |      |          |          |          |              |                           |         |
|---------------------|-----|-----|----------|------|----------|----------|----------|--------------|---------------------------|---------|
| <b>Kcnab2</b>       | 386 | 0   | 6.433642 | 1437 | 23.95    | 22.0234  | 5.574149 | Stalled      | chr4:151764852-151853588  | 86.737  |
| <b>Rabl4</b>        | 385 | 0   | 6.416974 | 310  | 5.166667 | 16.0095  | 4.0058   | Stalled      | chr15:77989892-78006538   | 14.647  |
| <b>Gm885</b>        | 385 | 0   | 6.416974 | 463  | 7.716667 | 4.67192  | 2.399425 | Elongating   | chr11:106610581-106628882 | 16.302  |
| <b>Fbxw8</b>        | 385 | 0   | 6.416974 | 1291 | 21.51667 | 10.0554  | 6.935457 | Stalled      | chr5:118514989-118607467  | 90.479  |
| <b>Prkcb</b>        | 385 | 0   | 6.416974 | 3529 | 58.81667 | 13.8601  | 10.48848 | Stalled      | chr7:129430638-129777915  | 345.278 |
| <b>Tspan4</b>       | 384 | 0   | 6.400307 | 189  | 3.15     | 1.9195   | 10.83459 | Stalled      | chr7:148659138-148679321  | 18.184  |
| <b>Col15a1</b>      | 384 | 0   | 6.400307 | 261  | 4.35     | 0.036143 | 0.855705 | Unclassified | chr4:47218883-47326037    | 105.155 |
| <b>Vti1a</b>        | 384 | 0   | 6.400307 | 2345 | 39.08333 | 4.83618  | 46.48294 | Stalled      | chr19:55388840-55701051   | 310.212 |
| <b>Ncf4</b>         | 383 | 0   | 6.383639 | 380  | 6.333333 | 45.8446  | 8.87643  | Stalled      | chr15:78073240-78093010   | 17.771  |
| <b>Nfam1</b>        | 383 | 0   | 6.383639 | 193  | 3.216667 | 1.79295  | 0.448027 | Stalled      | chr15:82828225-82855568   | 25.344  |
| <b>Rgs3</b>         | 383 | 0   | 6.383639 | 478  | 7.966667 | 0.600151 | 0        | Unclassified | chr4:62218880-62364053    | 143.174 |
| <b>Plxnc1</b>       | 383 | 0   | 6.383639 | 3217 | 53.61667 | 12.2012  | 7.110191 | Stalled      | chr10:94253611-94409212   | 153.602 |
| <b>Rasgrf2</b>      | 383 | 0   | 6.383639 | 200  | 3.333333 | 0.15763  | 3.25956  | Unclassified | chr13:92020012-92903449   | 881.438 |
| <b>Mapt</b>         | 382 | 0   | 6.366972 | 372  | 6.2      | 0.466157 | 2.112946 | Unclassified | chr11:104090749-104193407 | 100.659 |
| <b>Gstt2</b>        | 381 | 0   | 6.350304 | 342  | 5.7      | 85.4827  | 2.381353 | Stalled      | chr10:75294589-75299626   | 3.038   |
| <b>Abcb8</b>        | 381 | 0   | 6.350304 | 223  | 3.716667 | 13.0977  | 10.63784 | Stalled      | chr5:23897973-23915765    | 15.793  |
| <b>Tctn1</b>        | 381 | 0   | 6.350304 | 859  | 14.31667 | 4.89627  | 1.3453   | Elongating   | chr5:122691523-122716469  | 22.947  |
| <b>Strada</b>       | 381 | 0   | 6.350304 | 270  | 4.5      | 10.5793  | 34.95362 | Stalled      | chr11:106024649-106056862 | 30.214  |
| <b>Tns1</b>         | 381 | 0   | 6.350304 | 420  | 7        | 0.597707 | 4.040656 | Unclassified | chr1:73956804-74173021    | 214.218 |
| <b>Lpcat1</b>       | 379 | 0   | 6.316969 | 1323 | 22.05    | 19.7284  | 7.686333 | Stalled      | chr13:73602830-73651986   | 47.157  |
| <b>Gtf3c1</b>       | 379 | 0   | 6.316969 | 1034 | 17.23333 | 13.1634  | 12.61239 | Stalled      | chr7:132784467-132853202  | 66.736  |
| <b>Cd180</b>        | 378 | 0   | 6.300302 | 535  | 8.916667 | 12.4995  | 3.686012 | Stalled      | chr13:103481637-103496711 | 13.075  |
| <b>Ap1m1</b>        | 378 | 0   | 6.300302 | 587  | 9.783333 | 45.6625  | 7.488155 | Stalled      | chr8:74762030-74781278    | 17.249  |
| <b>Gm13251</b>      | 377 | 169 | 6.283634 | 55   | 0.916667 | 0.290897 | 1.043488 | Unclassified | chr4:145728598-145751009  | 20.412  |
| <b>Crybb1</b>       | 376 | 0   | 6.266967 | 150  | 2.5      | 0.601912 | 0.235244 | Stalled      | chr5:112682840-112698602  | 13.763  |
| <b>Tpst1</b>        | 376 | 0   | 6.266967 | 1383 | 23.05    | 26.6136  | 11.67767 | Stalled      | chr5:130553355-130611602  | 56.248  |
| <b>Ncan</b>         | 375 | 0   | 6.250299 | 72   | 1.2      | 0.345497 | 0.812902 | Unclassified | chr8:72616983-72646743    | 27.761  |
| <b>Atg16l2</b>      | 373 | 0   | 6.216965 | 768  | 12.8     | 8.09509  | 2.693794 | Elongating   | chr7:108438129-108452602  | 12.474  |
| <b>Zc3h4</b>        | 373 | 0   | 6.216965 | 1537 | 25.61667 | 16.6702  | 11.24323 | Stalled      | chr7:16984544-17023045    | 36.502  |
| <b>Clic4</b>        | 373 | 0   | 6.216965 | 3360 | 56       | 65.6863  | 6.324027 | Stalled      | chr4:134769884-134830675  | 58.792  |
| <b>Prr5l</b>        | 373 | 0   | 6.216965 | 488  | 8.133333 | 0.480231 | 0.404439 | Unclassified | chr2:101554441-101681137  | 124.697 |
| <b>Zfr2</b>         | 372 | 0   | 6.200297 | 185  | 3.083333 | 0.659805 | 10.08892 | Stalled      | chr10:80693907-80714868   | 18.962  |
| <b>Kif21b</b>       | 372 | 0   | 6.200297 | 1307 | 21.78333 | 14.2333  | 3.608421 | Stalled      | chr1:138025977-138074591  | 46.615  |
| <b>Adcy7</b>        | 372 | 0   | 6.200297 | 1524 | 25.4     | 14.4846  | 0.93042  | Stalled      | chr8:90794301-90853861    | 57.561  |
| <b>Ctsz</b>         | 371 | 64  | 6.18363  | 1314 | 21.9     | 246.965  | 1.98188  | Elongating   | chr2:174252994-174266493  | 11.5    |
| <b>Tnfr3</b>        | 371 | 0   | 6.18363  | 1550 | 25.83333 | 20.8356  | 3.521831 | Stalled      | chr10:18720721-18737216   | 14.496  |
| <b>Sdc4</b>         | 371 | 0   | 6.18363  | 1561 | 26.01667 | 47.5896  | 3.875101 | Stalled      | chr2:164249746-164270688  | 18.943  |
| <b>Acvr1b</b>       | 371 | 0   | 6.18363  | 331  | 5.516667 | 3.34325  | 14.13773 | Stalled      | chr15:101002555-101043032 | 38.478  |
| <b>Ntsdc3</b>       | 371 | 0   | 6.18363  | 700  | 11.66667 | 2.11835  | 25.63673 | Stalled      | chr10:86239749-86301134   | 59.386  |
| <b>B4gaint1</b>     | 370 | 0   | 6.166962 | 387  | 6.45     | 39.4195  | 4.272183 | Stalled      | chr10:126600280-126609386 | 7.107   |
| <b>Itp3r</b>        | 370 | 0   | 6.166962 | 1285 | 21.41667 | 18.4026  | 11.89408 | Stalled      | chr17:27192248-27259168   | 64.921  |
| <b>Ankrd55</b>      | 370 | 64  | 6.166962 | 384  | 6.4      | 1.86596  | 3.161297 | Unclassified | chr13:113076658-113174210 | 95.553  |
| <b>Lama5</b>        | 369 | 0   | 6.150295 | 568  | 9.466667 | 0.11026  | 0.314608 | Stalled      | chr2:179911077-179962564  | 49.488  |
| <b>Ccdc21</b>       | 369 | 73  | 6.150295 | 1463 | 24.38333 | 2.44316  | 10.54829 | Stalled      | chr4:133685772-133745000  | 57.229  |
| <b>Ece1</b>         | 369 | 0   | 6.150295 | 1002 | 16.7     | 4.31957  | 8.407085 | Stalled      | chr4:137416151-137521143  | 102.993 |
| <b>Irf1</b>         | 367 | 57  | 6.11696  | 781  | 13.01667 | 26.3468  | 3.79137  | Stalled      | chr11:53581515-53591876   | 8.362   |
| <b>Tpm3</b>         | 367 | 0   | 6.11696  | 2000 | 33.33333 | 50.3258  | 0.026555 | Stalled      | chr3:89874615-89904526    | 27.912  |
| <b>Kcnk13</b>       | 367 | 0   | 6.11696  | 262  | 4.366667 | 2.88755  | 6.493652 | Stalled      | chr12:101200708-101300891 | 98.184  |
| <b>Dbp</b>          | 366 | 0   | 6.100292 | 524  | 8.733333 | 7.44543  | 0.502286 | Stalled      | chr7:52958616-52965573    | 4.958   |
| <b>Dtx1</b>         | 366 | 0   | 6.100292 | 915  | 15.25    | 14.6119  | 2.862495 | Elongating   | chr5:121130272-121163678  | 31.407  |
| <b>Iscu</b>         | 365 | 0   | 6.083625 | 335  | 5.583333 | 23.6846  | 2.305345 | Elongating   | chr5:114220820-114228291  | 5.472   |
| <b>Bbc3</b>         | 365 | 0   | 6.083625 | 624  | 10.4     | 17.9912  | 3.239448 | Stalled      | chr7:16892931-16903682    | 8.752   |
| <b>Pdxk</b>         | 365 | 0   | 6.083625 | 298  | 4.966667 | 4.15142  | 16.47891 | Stalled      | chr10:77899491-77929693   | 28.203  |
| <b>Tmem184b</b>     | 365 | 0   | 6.083625 | 1221 | 20.35    | 12.3108  | 8.339884 | Stalled      | chr15:79191113-79235733   | 42.621  |
| <b>Hist1h1d</b>     | 364 | 101 | 6.066957 | 234  | 3.9      | 4.95852  | 5.171779 | Stalled      | chr13:23644900-23649877   | 2.978   |
| <b>Fam69b</b>       | 364 | 0   | 6.066957 | 1653 | 27.55    | 0.75833  | 0.038179 | Stalled      | chr2:26481976-26492017    | 8.042   |
| <b>Mvd</b>          | 364 | 0   | 6.066957 | 226  | 3.766667 | 107.821  | 7.894629 | Stalled      | chr8:124957495-124969322  | 9.828   |
| <b>P2ry6</b>        | 364 | 0   | 6.066957 | 71   | 1.183333 | 0.066996 | 0.798085 | Unclassified | chr7:108086147-108114880  | 26.734  |
| <b>Rhoh</b>         | 364 | 0   | 6.066957 | 1027 | 17.11667 | 7.93627  | 6.613895 | Stalled      | chr5:66252807-66287939    | 33.133  |
| <b>Gimap3</b>       | 363 | 62  | 6.05029  | 576  | 9.6      | 117.82   | 1.742606 | Elongating   | chr6:48714462-48722850    | 6.389   |
| <b>Pqlc3</b>        | 363 | 91  | 6.05029  | 432  | 7.2      | 10.244   | 6.507828 | Stalled      | chr12:16995454-17008924   | 11.471  |
| <b>Trex1</b>        | 362 | 0   | 6.033622 | 149  | 2.483333 | 34.2863  | 1.818673 | Unclassified | chr9:108960445-108963765  | 1.321   |
| <b>Btd</b>          | 362 | 0   | 6.033622 | 404  | 6.733333 | 9.79612  | 11.06031 | Stalled      | chr14:32452242-32481381   | 27.14   |
| <b>Zfp608</b>       | 362 | 0   | 6.033622 | 2107 | 35.11667 | 13.4633  | 1.461929 | Elongating   | chr18:55047701-55151567   | 101.867 |
| <b>Irf2</b>         | 361 | 94  | 6.016955 | 1746 | 29.1     | 22.0486  | 14.11182 | Stalled      | chr8:47823098-47932812    | 107.715 |
| <b>Prkag2</b>       | 360 | 0   | 6.000288 | 1058 | 17.63333 | 2.77254  | 6.403396 | Stalled      | chr5:24368552-24608460    | 237.909 |
| <b>Cd37</b>         | 359 | 0   | 5.98362  | 865  | 14.41667 | 267.502  | 2.159681 | Elongating   | chr7:52489001-52496209    | 5.209   |
| <b>Clec2d</b>       | 359 | 237 | 5.98362  | 915  | 15.25    | 11.4318  | 2.681585 | Stalled      | chr6:129128639-129136552  | 5.914   |
| <b>Cd276</b>        | 359 | 0   | 5.98362  | 35   | 0.583333 | 0.180967 | 0.617748 | Unclassified | chr9:58372106-58390747    | 16.642  |
| <b>Glipr2</b>       | 359 | 0   | 5.98362  | 529  | 8.816667 | 14.1848  | 4.905511 | Stalled      | chr4:43968573-43991990    | 21.418  |
| <b>Hhat</b>         | 359 | 55  | 5.98362  | 1175 | 19.58333 | 0.676509 | 15.02435 | Stalled      | chr1:194336709-194599413  | 260.705 |
| <b>Mgat1</b>        | 358 | 154 | 5.966953 | 1736 | 28.93333 | 56.3583  | 1.993152 | Elongating   | chr11:49055692-49076526   | 18.835  |
| <b>Ptmr12</b>       | 358 | 0   | 5.966953 | 854  | 14.23333 | 4.00198  | 18.33155 | Stalled      | chr15:12132848-12201995   | 67.148  |
| <b>Ppard</b>        | 358 | 0   | 5.966953 | 744  | 12.4     | 7.29177  | 6.507103 | Stalled      | chr17:28367698-28438414   | 68.717  |
| <b>Sergef</b>       | 358 | 0   | 5.966953 | 1268 | 21.13333 | 5.64931  | 14.70198 | Stalled      | chr7:53698542-53897160    | 196.619 |
| <b>Stard5</b>       | 357 | 0   | 5.950285 | 513  | 8.55     | 6.71059  | 2.959831 | Stalled      | chr7:90778526-90790838    | 10.313  |
| <b>Cdh29</b>        | 356 | 0   | 5.933618 | 591  | 9.85     | 0        | 3.064886 | Stalled      | chr9:107883423-107897338  | 11.916  |
| <b>Slc38a10</b>     | 356 | 0   | 5.933618 | 978  | 16.3     | 21.2608  | 7.745731 | Stalled      | chr11:119965264-120014665 | 47.402  |
| <b>Plcg2</b>        | 356 | 0   | 5.933618 | 3836 | 63.93333 | 51.6742  | 7.080214 | Stalled      | chr8:120020190-120159042  | 136.853 |
| <b>mmu-mir-200c</b> | 354 | 0   | 5.900283 | 601  | 10.01667 | ND       | ND       | Elongating   | chr6:124667057-124674077  | 7.021   |
| <b>Rusc1</b>        | 354 | 0   | 5.900283 | 334  | 5.566667 | 13.5809  | 4.016823 | Stalled      | chr3:88887900-88899285    | 9.386   |
| <b>Acbd4</b>        | 354 | 0   | 5.900283 | 326  | 5.433333 | 11.9124  | 1.219205 | Elongating   | chr11:102961001-102973513 | 10.513  |
| <b>Cacna1s</b>      | 354 | 0   | 5.900283 | 211  | 3.516667 | 2.60191  | 0.238055 | Unclassified | chr1:137947477-138016399  | 66.923  |
| <b>Dgk1</b>         | 354 | 0   | 5.900283 | 2144 | 35.73333 | 25.9571  | 5.571627 | Stalled      | chr1:89747861-89841064    | 91.204  |
| <b>Lemd2</b>        | 353 | 0   | 5.883615 | 432  | 7.2      | 18.1755  | 4.314911 | Stalled      | chr17:27326544-27343383   | 14.84   |
| <b>Capn5</b>        | 353 | 0   | 5.883615 | 363  | 6.05     | 2.87866  | 9.302009 | Stalled      | chr7:105270074-105328703  | 56.63   |

|                      |     |     |          |      |          |          |          |              |                           |         |
|----------------------|-----|-----|----------|------|----------|----------|----------|--------------|---------------------------|---------|
| <b>Edem1</b>         | 352 | 0   | 5.866948 | 1310 | 21.83333 | 36.9232  | 9.050073 | Stalled      | chr6:108776634-108809350  | 30.717  |
| <b>Dclre1b</b>       | 351 | 120 | 5.85028  | 234  | 3.9      | 7.12549  | 9.626013 | Stalled      | chr3:103604527-103615310  | 8.784   |
| <b>Pdap1</b>         | 351 | 0   | 5.85028  | 822  | 13.7     | 63.3724  | 3.434873 | Stalled      | chr5:145889638-145902958  | 11.321  |
| <b>Nkndr11</b>       | 351 | 0   | 5.85028  | 4400 | 73.33333 | 16.8573  | 6.227303 | Stalled      | chr8:125407220-125567897  | 158.678 |
| <b>Vdr</b>           | 350 | 0   | 5.833613 | 228  | 3.8      | 1.0867   | 4.517747 | Stalled      | chr15:97684857-97740727   | 53.871  |
| <b>Fkbp5</b>         | 350 | 0   | 5.833613 | 767  | 12.78333 | 15.7173  | 18.55468 | Stalled      | chr17:28536039-28625057   | 87.019  |
| <b>Clic1</b>         | 349 | 0   | 5.816945 | 1004 | 16.73333 | 168.888  | 2.772428 | Stalled      | chr17:35185187-35195664   | 8.478   |
| <b>Pcnx13</b>        | 349 | 0   | 5.816945 | 529  | 8.816667 | 12.3874  | 10.24096 | Stalled      | chr19:5664634-5690908     | 24.275  |
| <b>Cmah</b>          | 349 | 97  | 5.816945 | 1621 | 27.01667 | 3.16557  | 0.084112 | Stalled      | chr13:24417288-24569154   | 149.867 |
| <b>Anp32a</b>        | 348 | 0   | 5.800278 | 1752 | 29.2     | 100.334  | 3.56769  | Stalled      | chr9:62187149-62228609    | 37.461  |
| <b>Map3k1</b>        | 348 | 0   | 5.800278 | 2011 | 33.51667 | 9.10511  | 6.206823 | Stalled      | chr13:112536642-112601191 | 62.55   |
| <b>Rasgrp1</b>       | 348 | 0   | 5.800278 | 613  | 10.21667 | 5.86689  | 16.23063 | Stalled      | chr2:117105728-117170613  | 62.886  |
| <b>Sgms1</b>         | 348 | 0   | 5.800278 | 1462 | 24.36667 | 2.60455  | 9.658652 | Stalled      | chr19:32197217-32464944   | 265.728 |
| <b>Nfkb1a</b>        | 347 | 58  | 5.78361  | 618  | 10.3     | 125.819  | 1.961047 | Elongating   | chr12:56590395-56595634   | 3.24    |
| <b>Spn</b>           | 347 | 0   | 5.78361  | 155  | 2.583333 | 22.3945  | 1.186448 | Elongating   | chr7:134276977-134283331  | 4.355   |
| <b>Jund</b>          | 346 | 0   | 5.766943 | 1094 | 18.23333 | 230.981  | 0.1526   | Stalled      | chr8:73219637-73224515    | 2.879   |
| <b>Cybasc3</b>       | 346 | 0   | 5.766943 | 651  | 10.85    | 59.4717  | 5.956262 | Stalled      | chr19:10650212-10664320   | 12.109  |
| <b>Nek6</b>          | 346 | 0   | 5.766943 | 1622 | 27.03333 | 4.63337  | 4.363936 | Stalled      | chr2:38365216-38443010    | 75.795  |
| <b>Fam125b</b>       | 346 | 0   | 5.766943 | 450  | 7.5      | 1.0006   | 3.87959  | Unclassified | chr2:33585475-33745466    | 157.992 |
| <b>Uvrag</b>         | 346 | 0   | 5.766943 | 7127 | 118.7833 | 28.397   | 8.549309 | Stalled      | chr7:106035252-106291654  | 254.403 |
| <b>Etv3</b>          | 345 | 0   | 5.750276 | 810  | 13.5     | 14.7311  | 6.282304 | Stalled      | chr3:87327499-87344078    | 14.58   |
| <b>Gucy2c</b>        | 345 | 0   | 5.750276 | 356  | 5.933333 | 3.97615  | 0.569745 | Unclassified | chr6:136645804-136732263  | 84.46   |
| <b>Antxr1</b>        | 345 | 0   | 5.750276 | 512  | 8.533333 | 0.267818 | 0.281831 | Unclassified | chr6:87083846-87287769    | 201.924 |
| <b>Tmem176b</b>      | 344 | 0   | 5.733608 | 341  | 5.683333 | 87.3335  | 2.775123 | Stalled      | chr6:48783812-48792987    | 7.176   |
| <b>Crtc1</b>         | 344 | 0   | 5.733608 | 524  | 8.733333 | 2.96741  | 20.92816 | Stalled      | chr8:72906256-72965472    | 57.217  |
| <b>2010001M09Rik</b> | 343 | 110 | 5.716941 | 323  | 5.383333 | 889.234  | 1.868378 | Stalled      | chr18:35806919-35811021   | 2.103   |
| <b>Surf2</b>         | 343 | 0   | 5.716941 | 360  | 6        | 16.3961  | 2.457123 | Stalled      | chr2:26769940-26775690    | 3.751   |
| <b>Bat1a</b>         | 343 | 0   | 5.716941 | 1643 | 27.38333 | 94.7185  | 2.829781 | Stalled      | chr17:35376690-35390650   | 11.961  |
| <b>Ncoa3</b>         | 343 | 0   | 5.716941 | 1725 | 28.75    | 23.9057  | 13.3663  | Stalled      | chr2:165816136-165898742  | 80.607  |
| <b>Ttc7b</b>         | 343 | 0   | 5.716941 | 1327 | 22.11667 | 4.0096   | 4.959005 | Stalled      | chr12:101538979-101761032 | 220.054 |
| <b>Ptma</b>          | 342 | 0   | 5.700273 | 960  | 16       | 317.837  | 1.363553 | Elongating   | chr1:88421310-88427273    | 3.964   |
| <b>Icam5</b>         | 342 | 0   | 5.700273 | 105  | 1.75     | 2.60393  | 3.189189 | Stalled      | chr9:20834481-20843480    | 7       |
| <b>Titit</b>         | 342 | 52  | 5.700273 | 312  | 5.2      | 13.172   | 3.731326 | Stalled      | chr16:43648973-43666297   | 15.325  |
| <b>Gatad2a</b>       | 342 | 0   | 5.700273 | 1840 | 30.66667 | 14.4233  | 6.400903 | Stalled      | chr8:72430967-72500282    | 67.316  |
| <b>Evl</b>           | 342 | 0   | 5.700273 | 1231 | 20.51667 | 68.593   | 0.876345 | Stalled      | chr12:109790929-109926723 | 133.795 |
| <b>Dnajb13</b>       | 341 | 26  | 5.683606 | 291  | 4.85     | 1.64829  | 0.035776 | Stalled      | chr7:107651528-107665324  | 11.797  |
| <b>Cflar</b>         | 341 | 0   | 5.683606 | 1929 | 32.15    | 11.1864  | 2.395315 | Elongating   | chr1:58768129-58815726    | 45.598  |
| <b>Slamf7</b>        | 340 | 67  | 5.666938 | 1790 | 29.83333 | 11.0215  | 0.043403 | Stalled      | chr1:173562533-173585168  | 20.636  |
| <b>Samm50</b>        | 340 | 0   | 5.666938 | 597  | 9.95     | 45.5451  | 10.15975 | Stalled      | chr15:84020662-84044733   | 22.072  |
| <b>AW555464</b>      | 340 | 0   | 5.666938 | 183  | 3.05     | 3.29962  | 2.609435 | Elongating   | chr12:113958384-113984802 | 24.419  |
| <b>Cep110</b>        | 340 | 34  | 5.666938 | 1320 | 22       | 12.2173  | 21.90235 | Stalled      | chr2:34963011-35034342    | 69.332  |
| <b>Hip1</b>          | 340 | 0   | 5.666938 | 913  | 15.21667 | 1.88025  | 3.929332 | Stalled      | chr5:135882387-136022992  | 138.606 |
| <b>Zfp513</b>        | 339 | 0   | 5.650271 | 453  | 7.55     | 20.2061  | 2.530003 | Stalled      | chr5:31501353-31506606    | 3.254   |
| <b>Adssi1</b>        | 339 | 0   | 5.650271 | 360  | 6        | 6.5316   | 12.28287 | Stalled      | chr12:113856257-113879566 | 21.31   |
| <b>Csmtm7</b>        | 339 | 0   | 5.650271 | 843  | 14.05    | 18.7803  | 8.026056 | Stalled      | chr9:114665953-114692947  | 24.995  |
| <b>Ubr4</b>          | 339 | 0   | 5.650271 | 2305 | 38.41667 | 16.0517  | 13.81455 | Stalled      | chr4:138934573-139045445  | 108.873 |
| <b>Fzr1</b>          | 338 | 0   | 5.633603 | 754  | 12.56667 | 40.9388  | 2.484304 | Elongating   | chr10:80829623-80843115   | 11.493  |
| <b>Rab5c</b>         | 338 | 0   | 5.633603 | 485  | 8.083333 | 79.7696  | 8.929899 | Stalled      | chr11:100576579-100601444 | 22.866  |
| <b>Atg4d</b>         | 337 | 0   | 5.616936 | 611  | 10.18333 | 11.9793  | 3.089835 | Stalled      | chr9:21067742-21078812    | 9.071   |
| <b>Ncf1</b>          | 337 | 0   | 5.616936 | 983  | 16.38333 | 95.0179  | 1.780811 | Elongating   | chr5:134696129-134707495  | 9.367   |
| <b>Kdm4a</b>         | 337 | 0   | 5.616936 | 645  | 10.75    | 23.047   | 10.47094 | Stalled      | chr4:117814648-117854648  | 38.001  |
| <b>Spns3</b>         | 337 | 0   | 5.616936 | 139  | 2.316667 | 1.54264  | 10.48223 | Stalled      | chr11:72311657-72365748   | 52.092  |
| <b>Ctdp1</b>         | 337 | 0   | 5.616936 | 1049 | 17.48333 | 11.1019  | 20.67962 | Stalled      | chr18:80604697-80668406   | 61.71   |
| <b>Il9r</b>          | 336 | 0   | 5.600268 | 183  | 3.05     | 5.14094  | 1.11734  | Elongating   | chr11:32088996-32102279   | 11.284  |
| <b>Ldlr</b>          | 336 | 0   | 5.600268 | 2002 | 33.36667 | 22.4874  | 4.522219 | Stalled      | chr9:21526037-21554362    | 26.326  |
| <b>Mfsd10</b>        | 335 | 0   | 5.583601 | 129  | 2.15     | 26.2174  | 5.934509 | Stalled      | chr5:34976295-34981763    | 3.469   |
| <b>Mif4gd</b>        | 335 | 0   | 5.583601 | 456  | 7.6      | 65.3302  | 3.626236 | Stalled      | chr11:115469234-115475817 | 4.584   |
| <b>Bnip1</b>         | 335 | 0   | 5.583601 | 197  | 3.283333 | 14.3886  | 8.557283 | Stalled      | chr17:26916023-26929464   | 11.442  |
| <b>Sic1a5</b>        | 335 | 64  | 5.583601 | 1200 | 20       | 62.9648  | 4.126841 | Stalled      | chr7:17364694-17383623    | 16.93   |
| <b>Rab11fip4</b>     | 335 | 0   | 5.583601 | 355  | 5.916667 | 0.383063 | 0.668574 | Unclassified | chr11:79402713-79507514   | 102.802 |
| <b>Atg7</b>          | 335 | 0   | 5.583601 | 1517 | 25.28333 | 3.28031  | 21.54627 | Stalled      | chr6:114591142-114809954  | 216.813 |
| <b>Fermt3</b>        | 334 | 0   | 5.566933 | 1682 | 28.03333 | 108.151  | 3.25692  | Stalled      | chr19:7073447-7095959     | 20.513  |
| <b>Tmem123</b>       | 333 | 156 | 5.550266 | 2571 | 42.85    | 128.987  | 6.12086  | Stalled      | chr9:7762076-7794332      | 30.257  |
| <b>Tmem163</b>       | 333 | 0   | 5.550266 | 495  | 8.25     | 2.2857   | 6.29864  | Stalled      | chr1:129386918-129576598  | 187.681 |
| <b>Rnf122</b>        | 332 | 39  | 5.533598 | 261  | 4.35     | 2.69491  | 6.062458 | Stalled      | chr8:32220317-32241945    | 19.629  |
| <b>Cln6</b>          | 332 | 0   | 5.533598 | 749  | 12.48333 | 6.60562  | 9.702827 | Stalled      | chr4:147380592-147414876  | 32.285  |
| <b>Sic9a1</b>        | 332 | 0   | 5.533598 | 687  | 11.45    | 12.4494  | 21.9601  | Stalled      | chr4:132923686-132979613  | 53.928  |
| <b>Ppp1r13b</b>      | 332 | 0   | 5.533598 | 409  | 6.816667 | 3.45714  | 17.73156 | Stalled      | chr12:113066668-113148266 | 79.599  |
| <b>Pex10</b>         | 331 | 0   | 5.516931 | 364  | 6.066667 | 4.63676  | 2.008486 | Elongating   | chr4:154439138-154446515  | 5.378   |
| <b>Tspan32</b>       | 331 | 0   | 5.516931 | 656  | 10.93333 | 17.101   | 4.095901 | Stalled      | chr7:150188950-150205390  | 14.441  |
| <b>Pear1</b>         | 331 | 0   | 5.516931 | 551  | 9.183333 | 7.42167  | 1.522253 | Elongating   | chr3:87553018-87574875    | 19.858  |
| <b>Pofut1</b>        | 331 | 0   | 5.516931 | 834  | 13.9     | 8.96454  | 11.19415 | Stalled      | chr2:153065267-153095985  | 28.719  |
| <b>Plcg1</b>         | 331 | 0   | 5.516931 | 489  | 8.15     | 5.18946  | 5.059656 | Stalled      | chr2:160555045-160601496  | 44.452  |
| <b>Zbtb7b</b>        | 330 | 0   | 5.500264 | 296  | 4.933333 | 9.67774  | 0.9376   | Stalled      | chr3:89181567-89199125    | 15.559  |
| <b>4930539E08Rik</b> | 330 | 0   | 5.500264 | 192  | 3.2      | 1.2079   | 0.256241 | Stalled      | chr17:29033339-29054269   | 18.931  |
| <b>Usp22</b>         | 330 | 0   | 5.500264 | 828  | 13.8     | 10.8045  | 4.873783 | Stalled      | chr11:60965282-60990561   | 23.28   |
| <b>Scube1</b>        | 330 | 0   | 5.500264 | 227  | 3.783333 | 0.087635 | 1.045575 | Unclassified | chr15:83433012-83557451   | 122.44  |
| <b>Ncln</b>          | 328 | 0   | 5.466929 | 355  | 5.916667 | 26.949   | 6.534385 | Stalled      | chr10:80949203-80961108   | 9.906   |
| <b>Atp4a</b>         | 328 | 0   | 5.466929 | 133  | 2.216667 | 0.959169 | 0.084678 | Stalled      | chr7:31495250-31510553    | 13.304  |
| <b>Ubtf</b>          | 328 | 0   | 5.466929 | 1825 | 30.41667 | 46.1227  | 1.229698 | Elongating   | chr11:102165873-102182410 | 14.538  |
| <b>D730040F13Rik</b> | 328 | 0   | 5.466929 | 780  | 13       | 2.94875  | 7.535163 | Stalled      | chr4:56888884-56962301    | 71.418  |
| <b>Lef1</b>          | 328 | 0   | 5.466929 | 748  | 12.46667 | 4.0762   | 1.561116 | Stalled      | chr3:130811388-130926249  | 112.862 |
| <b>Zfp36</b>         | 327 | 3   | 5.450261 | 379  | 6.316667 | 46.7677  | 2.383103 | Stalled      | chr7:29161802-29166247    | 2.446   |
| <b>Ruvbl2</b>        | 327 | 0   | 5.450261 | 444  | 7.4      | 50.1792  | 6.297334 | Stalled      | chr7:52677267-52691834    | 12.568  |
| <b>Freq</b>          | 327 | 0   | 5.450261 | 242  | 4.033333 | 0.911507 | 3.341938 | Stalled      | chr2:31099442-31150991    | 49.55   |
| <b>BC030307</b>      | 327 | 83  | 5.450261 | 386  | 6.433333 | 4.5623   | 83.85025 | Stalled      | chr10:86166555-86239588   | 71.034  |



|                      |     |     |          |      |          |          |          |              |                           |         |
|----------------------|-----|-----|----------|------|----------|----------|----------|--------------|---------------------------|---------|
| <b>Bop1</b>          | 326 | 0   | 5.433594 | 877  | 14.61667 | 41.0961  | 11.91833 | Stalled      | chr15:76283425-76309699   | 24.275  |
| <b>Rassf4</b>        | 326 | 0   | 5.433594 | 324  | 5.4      | 4.43466  | 22.44221 | Stalled      | chr6:116583025-116625854  | 40.83   |
| <b>Pitpnm1</b>       | 325 | 0   | 5.416926 | 414  | 6.9      | 21.1722  | 3.34132  | Stalled      | chr19:4098116-4113964     | 13.849  |
| <b>Sla2</b>          | 325 | 0   | 5.416926 | 221  | 3.683333 | 0.983745 | 2.303906 | Elongating   | chr2:156698657-156714814  | 14.158  |
| <b>Serinc3</b>       | 325 | 138 | 5.416926 | 2034 | 33.9     | 116.814  | 6.013136 | Stalled      | chr2:163449008-163472879  | 21.872  |
| <b>Iqsec1</b>        | 325 | 0   | 5.416926 | 2264 | 37.73333 | 18.5512  | 1.494804 | Elongating   | chr6:90609591-90668523    | 56.933  |
| <b>Alg14</b>         | 325 | 57  | 5.416926 | 340  | 5.666667 | 8.9413   | 44.64302 | Stalled      | chr3:120992734-121064929  | 70.196  |
| <b>Cdk8</b>          | 325 | 131 | 5.416926 | 648  | 10.8     | 7.54442  | 10.26329 | Stalled      | chr5:147041250-147114450  | 71.201  |
| <b>Ahnak</b>         | 325 | 0   | 5.416926 | 259  | 4.316667 | 0.572011 | 6.266473 | Stalled      | chr19:9061773-9151409     | 87.637  |
| <b>Runx1</b>         | 325 | 0   | 5.416926 | 5212 | 86.86667 | 5.25802  | 5.841392 | Stalled      | chr16:92601710-92828311   | 224.602 |
| <b>Itrp1</b>         | 325 | 0   | 5.416926 | 3911 | 65.18333 | 11.6071  | 25.86318 | Stalled      | chr6:108161089-108501104  | 338.016 |
| <b>Phf19</b>         | 324 | 0   | 5.400259 | 674  | 11.23333 | 7.20641  | 5.989657 | Stalled      | chr2:34749274-34771496    | 20.223  |
| <b>Anxa6</b>         | 324 | 0   | 5.400259 | 554  | 9.233333 | 33.391   | 7.663165 | Stalled      | chr11:54792463-54848973   | 54.511  |
| <b>mmu-mir-23a,r</b> | 323 | 0   | 5.383591 | 706  | 11.76667 | ND       | ND       | Stalled      | chr8:86722447-86733454    | 11.008  |
| <b>Dgkz</b>          | 323 | 0   | 5.383591 | 635  | 10.58333 | 19.2655  | 7.427439 | Stalled      | chr2:91772978-91805720    | 30.743  |
| <b>Pcif1</b>         | 322 | 0   | 5.366924 | 849  | 14.15    | 15.7564  | 7.259917 | Stalled      | chr2:164702867-164716937  | 12.071  |
| <b>Sipa1</b>         | 322 | 0   | 5.366924 | 477  | 7.95     | 38.7033  | 4.623527 | Stalled      | chr19:5651184-5665707     | 12.524  |
| <b>Ptprcd</b>        | 322 | 0   | 5.366924 | 468  | 7.8      | 60.3742  | 1.157393 | Elongating   | chr14:31408554-31425498   | 14.945  |
| <b>Limd1</b>         | 322 | 0   | 5.366924 | 1046 | 17.43333 | 30.8377  | 5.078206 | Stalled      | chr9:123385818-123430668  | 42.851  |
| <b>Hspg2</b>         | 322 | 0   | 5.366924 | 373  | 6.216667 | 0.770026 | 11.49099 | Stalled      | chr4:137022717-137126545  | 101.829 |
| <b>Ptprcap</b>       | 321 | 77  | 5.350256 | 411  | 6.85     | 323.586  | 0.889916 | Elongating   | chr19:4152645-4156710     | 2.066   |
| <b>Haoa</b>          | 321 | 63  | 5.350256 | 646  | 10.76667 | 27.6698  | 14.12237 | Stalled      | chr17:84230693-84248130   | 15.438  |
| <b>D6Mm5e</b>        | 321 | 0   | 5.350256 | 499  | 8.316667 | 0.568642 | 0.141711 | Stalled      | chr6:82894915-82980303    | 83.389  |
| <b>Nop56</b>         | 320 | 0   | 5.333589 | 697  | 11.61667 | 45.055   | 4.566195 | Stalled      | chr2:130098147-130105049  | 4.903   |
| <b>Gramd2</b>        | 320 | 0   | 5.333589 | 46   | 0.766667 | 1.59241  | 3.85513  | Stalled      | chr9:59553570-59564231    | 8.662   |
| <b>Ppp2r2c</b>       | 320 | 0   | 5.333589 | 159  | 2.65     | 0.041333 | 1.04916  | Unclassified | chr5:37257808-37346317    | 86.51   |
| <b>Wdr38</b>         | 319 | 0   | 5.316921 | 764  | 12.73333 | 2.02408  | 0.320923 | Stalled      | chr2:38851828-38857104    | 3.277   |
| <b>Adat3</b>         | 319 | 0   | 5.316921 | 222  | 3.7      | 23.0801  | 5.351853 | Stalled      | chr10:80063624-80070399   | 4.776   |
| <b>Wnt10a</b>        | 319 | 0   | 5.316921 | 48   | 0.8      | 3.58864  | 1.697275 | Unclassified | chr1:74836592-74850747    | 12.156  |
| <b>Pde4c</b>         | 319 | 0   | 5.316921 | 203  | 3.383333 | 1.3965   | 0.341935 | Stalled      | chr8:73245962-73275075    | 27.114  |
| <b>Cd2</b>           | 318 | 0   | 5.300254 | 340  | 5.666667 | 33.6061  | 0.942903 | Elongating   | chr3:101079830-101093862  | 12.033  |
| <b>Rrp1</b>          | 318 | 0   | 5.300254 | 694  | 11.56667 | 138.712  | 4.188565 | Stalled      | chr10:77863106-77877788   | 12.683  |
| <b>Tnfrsf8</b>       | 318 | 0   | 5.300254 | 3110 | 51.83333 | 16.4578  | 3.550647 | Stalled      | chr4:144858878-144907050  | 46.173  |
| <b>Zfp408</b>        | 317 | 0   | 5.283587 | 162  | 2.7      | 13.1119  | 6.507076 | Stalled      | chr2:91483844-91491948    | 6.105   |
| <b>Il12a</b>         | 317 | 0   | 5.283587 | 167  | 2.783333 | 9.42836  | 0.436761 | Stalled      | chr3:68492565-68502469    | 7.905   |
| <b>Trim11</b>        | 317 | 0   | 5.283587 | 598  | 9.966667 | 21.2241  | 4.914592 | Stalled      | chr11:58789617-58804960   | 13.344  |
| <b>Cyp4f18</b>       | 317 | 0   | 5.283587 | 177  | 2.95     | 16.6257  | 3.167835 | Stalled      | chr8:74512380-74535525    | 21.146  |
| <b>5031414D18Rik</b> | 317 | 0   | 5.283587 | 998  | 16.63333 | 6.05645  | 4.157057 | Stalled      | chr14:75413833-75452339   | 36.507  |
| <b>Por</b>           | 317 | 0   | 5.283587 | 572  | 9.533333 | 20.8192  | 21.19996 | Stalled      | chr5:136163083-136211195  | 46.113  |
| <b>Ttc13</b>         | 317 | 0   | 5.283587 | 397  | 6.616667 | 7.69524  | 19.00851 | Stalled      | chr8:127195226-127247875  | 50.65   |
| <b>Iqgap1</b>        | 317 | 0   | 5.283587 | 3347 | 55.78333 | 32.1662  | 10.24246 | Stalled      | chr7:87856468-87950217    | 91.75   |
| <b>Akt1s1</b>        | 316 | 0   | 5.266919 | 585  | 9.75     | 18.3943  | 1.168456 | Elongating   | chr7:52102596-52110780    | 6.185   |
| <b>Fbxl18</b>        | 316 | 0   | 5.266919 | 154  | 2.566667 | 3.74808  | 11.96023 | Stalled      | chr5:143633467-143658917  | 23.451  |
| <b>Traf3ip3</b>      | 316 | 54  | 5.266919 | 1344 | 22.4     | 39.5059  | 3.969438 | Stalled      | chr1:195001698-195029740  | 26.043  |
| <b>Lsp1</b>          | 316 | 0   | 5.266919 | 720  | 12       | 131.576  | 2.913361 | Elongating   | chr7:149644774-149680504  | 33.731  |
| <b>Rpl13a</b>        | 315 | 0   | 5.250252 | 674  | 11.23333 | 1433.89  | 1.647799 | Elongating   | chr7:52381145-52386105    | 2.961   |
| <b>Gm14446</b>       | 315 | 127 | 5.250252 | 17   | 0.283333 | 0.65965  | 0.644446 | Unclassified | chr19:34667377-34678458   | 9.082   |
| <b>Lrch4</b>         | 315 | 73  | 5.250252 | 255  | 4.25     | 22.0291  | 12.50605 | Stalled      | chr5:138068350-138082327  | 11.978  |
| <b>Atg2a</b>         | 315 | 0   | 5.250252 | 295  | 4.916667 | 7.63612  | 6.615946 | Stalled      | chr19:6239667-6262304     | 20.638  |
| <b>Arhgap23</b>      | 315 | 0   | 5.250252 | 165  | 2.75     | 0.526632 | 0.947864 | Unclassified | chr11:97309473-97363714   | 52.242  |
| <b>Gstz1</b>         | 314 | 0   | 5.233584 | 623  | 10.38333 | 4.95896  | 6.062053 | Stalled      | chr12:88486667-88505673   | 17.007  |
| <b>1810008A18Rik</b> | 314 | 0   | 5.233584 | 988  | 16.46667 | 19.5045  | 9.615791 | Stalled      | chr10:76949400-76980558   | 29.159  |
| <b>Atp2a3</b>        | 314 | 0   | 5.233584 | 756  | 12.6     | 65.4714  | 7.455355 | Stalled      | chr11:72772670-72806545   | 31.876  |
| <b>Lgr6</b>          | 314 | 0   | 5.233584 | 271  | 4.516667 | 0.665048 | 0.303208 | Unclassified | chr1:136882929-137003853  | 118.925 |
| <b>Derl3</b>         | 313 | 0   | 5.216917 | 176  | 2.933333 | 36.7177  | 1.757808 | Elongating   | chr10:75354142-75358686   | 2.545   |
| <b>Dok3</b>          | 313 | 64  | 5.216917 | 160  | 2.666667 | 31.1743  | 4.716229 | Stalled      | chr13:55624595-55631899   | 5.305   |
| <b>Dusp7</b>         | 313 | 0   | 5.216917 | 198  | 3.3      | 6.44946  | 2.298029 | Elongating   | chr9:106268962-106278052  | 7.091   |
| <b>Pld4</b>          | 313 | 47  | 5.216917 | 422  | 7.033333 | 71.7212  | 1.964198 | Elongating   | chr12:113996865-114007197 | 8.333   |
| <b>Fam83e</b>        | 312 | 0   | 5.200249 | 674  | 11.23333 | 0.291682 | 3.085669 | Stalled      | chr7:52974589-52984862    | 8.274   |
| <b>Nfe211</b>        | 312 | 0   | 5.200249 | 640  | 10.66667 | 26.1548  | 8.797058 | Stalled      | chr11:96678727-96693282   | 12.556  |
| <b>Ube2i</b>         | 312 | 0   | 5.200249 | 939  | 15.65    | 28.4789  | 1.584686 | Elongating   | chr17:25397455-25413236   | 13.782  |
| <b>Il2rb</b>         | 312 | 0   | 5.200249 | 605  | 10.08333 | 14.2158  | 2.592708 | Elongating   | chr15:78310978-78327452   | 14.475  |
| <b>Dip2b</b>         | 312 | 50  | 5.200249 | 2724 | 45.4     | 3.43021  | 8.792983 | Stalled      | chr15:99867094-100049904  | 180.811 |
| <b>Pitpnc1</b>       | 312 | 0   | 5.200249 | 927  | 15.45    | 2.94617  | 18.50031 | Stalled      | chr11:107069205-107334034 | 262.83  |
| <b>Gpr56</b>         | 311 | 0   | 5.183582 | 150  | 2.5      | 1.31843  | 1.280699 | Unclassified | chr8:97506502-97538091    | 29.59   |
| <b>Hs3st1</b>        | 311 | 0   | 5.183582 | 220  | 3.666667 | 1.39932  | 7.611883 | Stalled      | chr5:40005173-40037870    | 30.698  |
| <b>Btg2</b>          | 310 | 110 | 5.166914 | 298  | 4.966667 | 54.2369  | 4.621815 | Stalled      | chr1:135971441-135977732  | 4.292   |
| <b>Rnf114</b>        | 310 | 0   | 5.166914 | 980  | 16.33333 | 32.2962  | 5.661512 | Stalled      | chr2:167316144-167341666  | 23.523  |
| <b>Cabcl1</b>        | 310 | 0   | 5.166914 | 541  | 9.016667 | 3.34081  | 10.6449  | Stalled      | chr1:182095368-182128151  | 30.784  |
| <b>Hmgm3</b>         | 310 | 84  | 5.166914 | 1709 | 28.48333 | 39.6436  | 2.146444 | Elongating   | chr9:83003550-83042214    | 36.665  |
| <b>Ski</b>           | 310 | 0   | 5.166914 | 887  | 14.78333 | 2.84312  | 5.089007 | Stalled      | chr4:154528183-154596644  | 68.462  |
| <b>Serpinf1</b>      | 309 | 0   | 5.150247 | 252  | 4.2      | 3.04466  | 0.263949 | Stalled      | chr11:75223530-75238125   | 12.596  |
| <b>Ankrd24</b>       | 309 | 0   | 5.150247 | 293  | 4.883333 | 3.37136  | 1.220141 | Elongating   | chr10:81089284-81110357   | 19.074  |
| <b>Elmod3</b>        | 309 | 0   | 5.150247 | 189  | 3.15     | 4.51055  | 19.95481 | Stalled      | chr6:72515920-72550336    | 32.417  |
| <b>Pex16</b>         | 308 | 0   | 5.133579 | 147  | 2.45     | 18.6424  | 7.539445 | Stalled      | chr2:92213395-92221376    | 5.982   |
| <b>Map4k4</b>        | 308 | 0   | 5.133579 | 2091 | 34.85    | 22.2935  | 7.524363 | Stalled      | chr1:39955757-40083155    | 125.399 |
| <b>H2-DMA</b>        | 307 | 0   | 5.116912 | 208  | 3.466667 | 239.812  | 2.43624  | Stalled      | chr17:34270615-34275480   | 2.866   |
| <b>Rhbh</b>          | 307 | 0   | 5.116912 | 27   | 0.45     | 0.891512 | 0.857823 | Unclassified | chr3:88046795-88060606    | 11.812  |
| <b>Trmu</b>          | 307 | 0   | 5.116912 | 233  | 3.883333 | 7.58697  | 15.28877 | Stalled      | chr15:85707756-85727823   | 18.068  |
| <b>B4galnt5</b>      | 307 | 0   | 5.116912 | 2469 | 41.15    | 16.6971  | 2.902665 | Elongating   | chr2:167123944-167176678  | 50.735  |
| <b>Disc1</b>         | 307 | 0   | 5.116912 | 441  | 7.35     | 0.387417 | 7.322012 | Stalled      | chr8:127576094-127785051  | 206.958 |
| <b>Pink1</b>         | 306 | 0   | 5.100244 | 263  | 4.383333 | 15.555   | 4.411164 | Stalled      | chr4:137869324-137884211  | 12.888  |
| <b>Zfp219</b>        | 306 | 0   | 5.100244 | 225  | 3.75     | 5.28623  | 9.156534 | Stalled      | chr14:52625751-52642408   | 14.658  |
| <b>Sfp1</b>          | 306 | 0   | 5.100244 | 676  | 11.26667 | 45.5558  | 7.712794 | Stalled      | chr2:90934953-90959131    | 18.961  |
| <b>6330416G13Rik</b> | 306 | 0   | 5.100244 | 259  | 4.316667 | 3.50164  | 2.640363 | Elongating   | chr4:63219393-63247387    | 25.995  |
| <b>Abcc1</b>         | 306 | 0   | 5.100244 | 1519 | 25.31667 | 6.46148  | 13.63229 | Stalled      | chr16:14359652-14474967   | 113.316 |

|               |     |     |          |      |          |          |          |              |                           |          |
|---------------|-----|-----|----------|------|----------|----------|----------|--------------|---------------------------|----------|
| Vps13d        | 306 | 0   | 5.100244 | 2053 | 34.21667 | 3.36611  | 0.662063 | Stalled      | chr4:144565039-144782495  | 215.457  |
| Mafg          | 305 | 0   | 5.083577 | 263  | 4.383333 | 12.9089  | 2.402686 | Elongating   | chr11:120489666-120496861 | 5.196    |
| Mcam          | 305 | 0   | 5.083577 | 195  | 3.25     | 0.252604 | 0.454842 | Stalled      | chr9:43940740-43950809    | 8.07     |
| Chd9          | 305 | 0   | 5.083577 | 1961 | 32.68333 | 2.67019  | 11.30738 | Stalled      | chr8:93350733-93578407    | 225.675  |
| Cicf1         | 304 | 0   | 5.066909 | 261  | 4.35     | 18.0768  | 1.966353 | Elongating   | chr19:4212391-4222615     | 8.225    |
| Slc17a9       | 304 | 0   | 5.066909 | 741  | 12.35    | 11.4495  | 7.18138  | Stalled      | chr2:180458043-180476983  | 16.941   |
| Inpp5k        | 304 | 0   | 5.066909 | 351  | 5.85     | 12.076   | 14.83885 | Stalled      | chr11:75442521-75462367   | 17.847   |
| Acsf2         | 304 | 0   | 5.066909 | 512  | 8.533333 | 8.56829  | 7.232703 | Stalled      | chr11:94418415-94465100   | 44.686   |
| Frm4b         | 304 | 0   | 5.066909 | 681  | 11.35    | 0.310915 | 0.326271 | Unclassified | chr6:97236860-97569651    | 330.792  |
| Hspa5         | 303 | 61  | 5.050242 | 416  | 6.933333 | 339.521  | 6.390741 | Stalled      | chr2:34625609-34632049    | 4.441    |
| Myc           | 303 | 0   | 5.050242 | 1287 | 21.45    | 53.4588  | 1.563911 | Elongating   | chr15:61814895-61821916   | 5.022    |
| Nfkbie        | 303 | 0   | 5.050242 | 546  | 9.1      | 28.5507  | 1.670586 | Elongating   | chr17:45690664-45700117   | 7.454    |
| Mier2         | 302 | 0   | 5.033575 | 248  | 4.133333 | 8.19349  | 6.822248 | Stalled      | chr10:79002989-79019836   | 14.848   |
| Tnnt2         | 302 | 0   | 5.033575 | 66   | 1.1      | 0.335143 | 3.311028 | Stalled      | chr1:137730962-137748838  | 15.877   |
| Tead2         | 302 | 0   | 5.033575 | 833  | 13.88333 | 0.890612 | 0.059543 | Stalled      | chr7:52469122-52488989    | 17.868   |
| Son           | 302 | 0   | 5.033575 | 1508 | 25.13333 | 25.4049  | 10.6605  | Stalled      | chr16:91646068-91679437   | 31.37    |
| Traf4         | 301 | 0   | 5.016907 | 337  | 5.616667 | 13.0035  | 2.840072 | Stalled      | chr11:77971924-77981052   | 7.129    |
| Fam116b       | 301 | 0   | 5.016907 | 222  | 3.7      | 3.27602  | 19.16893 | Stalled      | chr15:89012642-89028905   | 14.264   |
| Hck           | 301 | 0   | 5.016907 | 163  | 2.716667 | 2.37206  | 3.887523 | Stalled      | chr2:152932243-152977172  | 42.93    |
| Ptprj         | 301 | 0   | 5.016907 | 923  | 15.38333 | 1.22466  | 8.52226  | Stalled      | chr2:90269912-90422804    | 150.893  |
| Dak           | 300 | 0   | 5.00024  | 728  | 12.13333 | 4.45295  | 0.598758 | Stalled      | chr19:10666686-10680748   | 12.063   |
| Rps19         | 299 | 0   | 4.983572 | 704  | 11.73333 | 197.553  | 2.899603 | Stalled      | chr7:25667732-25674821    | 5.09     |
| Slc25a10      | 299 | 0   | 4.983572 | 136  | 2.266667 | 8.21393  | 10.55706 | Stalled      | chr11:120351150-120362475 | 9.326    |
| C85492        | 299 | 0   | 4.983572 | 47   | 0.783333 | 0.17853  | 0.444275 | Unclassified | chr9:121890723-121907144  | 14.422   |
| 1110007L15Rik | 299 | 0   | 4.983572 | 677  | 11.28333 | 26.9639  | 10.32045 | Stalled      | chr5:139726277-139746004  | 17.728   |
| Ptk2b         | 299 | 57  | 4.983572 | 2808 | 46.8     | 37.3252  | 4.104446 | Stalled      | chr14:66772093-66901889   | 127.797  |
| Ppan          | 298 | 0   | 4.966905 | 481  | 8.016667 | 50.7376  | 3.018384 | Stalled      | chr9:20690618-20696623    | 4.006    |
| Ath1l         | 298 | 0   | 4.966905 | 97   | 1.616667 | 1.72715  | 10.49843 | Stalled      | chr7:148125479-148133557  | 6.079    |
| Dgat1         | 298 | 0   | 4.966905 | 251  | 4.183333 | 3.91407  | 9.455534 | Stalled      | chr15:76332444-76344248   | 9.805    |
| Eif3d         | 298 | 0   | 4.966905 | 769  | 12.81667 | 99.8151  | 8.539345 | Stalled      | chr15:77789427-77803254   | 11.828   |
| Abcb9         | 298 | 0   | 4.966905 | 257  | 4.283333 | 1.22617  | 3.294948 | Stalled      | chr5:124511865-124547807  | 33.943   |
| BC017612      | 298 | 0   | 4.966905 | 488  | 8.133333 | 21.1277  | 0.883109 | Stalled      | chr9:15307938-15349703    | 39.766   |
| Usp10         | 298 | 0   | 4.966905 | 1190 | 19.83333 | 20.2749  | 9.727986 | Stalled      | chr8:122432751-122481457  | 46.707   |
| 2410131K14Rik | 297 | 0   | 4.950237 | 165  | 2.75     | 5.52414  | 20.24203 | Stalled      | chr5:118693235-118713123  | 17.889   |
| Batf          | 297 | 0   | 4.950237 | 1140 | 19       | 130.095  | 5.66715  | Stalled      | chr12:87025669-87050037   | 22.369   |
| Dnase1l3      | 297 | 0   | 4.950237 | 373  | 6.216667 | 5.24148  | 3.630199 | Stalled      | chr14:8797703-8828696     | 28.994   |
| Scml4         | 296 | 0   | 4.93357  | 346  | 5.766667 | 1.50402  | 5.573672 | Stalled      | chr10:42578317-42680588   | 100.272  |
| Cnrm2         | 296 | 0   | 4.93357  | 249  | 4.15     | 6.14345  | 23.51407 | Stalled      | chr19:46834098-46953070   | 116.973  |
| Trmrt2a       | 295 | 0   | 4.916902 | 635  | 10.58333 | 47.2846  | 3.220577 | Stalled      | chr16:18246975-18253595   | 4.621    |
| Sic1a4        | 295 | 0   | 4.916902 | 189  | 3.15     | 4.44893  | 27.3003  | Stalled      | chr11:20202182-20234716   | 30.535   |
| Reb27a        | 294 | 0   | 4.900235 | 511  | 8.516667 | 14.0494  | 8.824823 | Stalled      | chr9:72890671-72945399    | 52.729   |
| Pecam1        | 294 | 0   | 4.900235 | 908  | 15.13333 | 7.40457  | 1.365022 | Elongating   | chr11:106515531-106578595 | 61.065   |
| Lrrc45        | 293 | 0   | 4.883567 | 79   | 1.316667 | 10.2571  | 8.91589  | Stalled      | chr11:120573266-120582439 | 7.174    |
| Tap2          | 293 | 0   | 4.883567 | 697  | 11.61667 | 93.7652  | 2.037158 | Elongating   | chr17:34339423-34353264   | 11.842   |
| Smo           | 293 | 48  | 4.883567 | 84   | 1.4      | 0.629897 | 1.142223 | Unclassified | chr6:29683496-29711366    | 25.871   |
| Obfc1         | 293 | 0   | 4.883567 | 363  | 6.05     | 5.26071  | 16.25782 | Stalled      | chr19:47575537-47613510   | 35.974   |
| Klc1          | 293 | 0   | 4.883567 | 2861 | 47.68333 | 73.0236  | 5.099593 | Stalled      | chr12:112995059-113044986 | 47.928   |
| Pepd          | 293 | 0   | 4.883567 | 1821 | 30.35    | 10.6976  | 7.465354 | Stalled      | chr7:35695425-35829727    | 132.303  |
| Zfp361l       | 292 | 0   | 4.8669   | 713  | 11.88333 | 75.7906  | 2.580568 | Stalled      | chr12:81208746-81216000   | 5.255    |
| Pias4         | 292 | 0   | 4.8669   | 933  | 15.55    | 17.2927  | 2.494245 | Elongating   | chr10:80616715-80632465   | 13.751   |
| Unc93b1       | 292 | 0   | 4.8669   | 958  | 15.96667 | 126.174  | 4.226267 | Stalled      | chr19:3933185-3949339     | 14.155   |
| Rfc2          | 292 | 0   | 4.8669   | 663  | 11.05    | 50.8537  | 3.651142 | Stalled      | chr5:135056559-135074198  | 15.64    |
| Cbx7          | 292 | 0   | 4.8669   | 830  | 13.83333 | 12.9207  | 2.097548 | Elongating   | chr15:79746236-79765076   | 16.841   |
| Pibld2        | 292 | 0   | 4.8669   | 428  | 7.133333 | 11.2217  | 5.618778 | Stalled      | chr5:120933901-120955632  | 19.732   |
| Tecpr2        | 292 | 0   | 4.8669   | 316  | 5.266667 | 1.49756  | 62.3006  | Stalled      | chr12:112125473-112210604 | 83.132   |
| Cdc42se1      | 291 | 0   | 4.850232 | 421  | 7.016667 | 55.6976  | 7.691154 | Stalled      | chr3:95030701-95040331    | 7.631    |
| Trabd         | 291 | 0   | 4.850232 | 558  | 9.3      | 43.4819  | 2.326912 | Elongating   | chr15:88904493-88917505   | 11.013   |
| Unkl          | 291 | 0   | 4.850232 | 205  | 3.416667 | 1.94732  | 5.635749 | Stalled      | chr17:25357526-25371387   | 11.862   |
| Gli3          | 291 | 0   | 4.850232 | 330  | 5.5      | 0.180947 | 2.636092 | Unclassified | chr4:107105323-107307664  | 200.342  |
| Trm222        | 290 | 0   | 4.833565 | 256  | 4.266667 | 13.7907  | 9.347074 | Stalled      | chr4:132821959-132835705  | 11.747   |
| Twf2          | 290 | 0   | 4.833565 | 170  | 2.833333 | 32.6452  | 15.24619 | Stalled      | chr9:106103438-106117718  | 12.281   |
| Dguok         | 290 | 0   | 4.833565 | 194  | 3.233333 | 6.28913  | 49.69565 | Stalled      | chr6:83430207-83458963    | 26.757   |
| Mapkapk2      | 290 | 0   | 4.833565 | 1224 | 20.4     | 40.3303  | 12.34327 | Stalled      | chr1:132950280-132996120  | 43.841   |
| Morn1         | 290 | 0   | 4.833565 | 212  | 3.533333 | 1.2575   | 49.36191 | Stalled      | chr4:154458685-154519616  | 58.932   |
| BC031353      | 290 | 0   | 4.833565 | 774  | 12.9     | 6.3894   | 21.15855 | Stalled      | chr9:74798859-74880275    | 79.417   |
| Inpp4a        | 290 | 0   | 4.833565 | 449  | 7.483333 | 1.53484  | 11.59662 | Stalled      | chr1:37354737-37467578    | 110.842  |
| Filip1l       | 290 | 94  | 4.833565 | 1416 | 23.6     | 3.87511  | 0.935838 | Stalled      | chr16:57351389-57572909   | 219.521  |
| 2610528E23Rik | 290 | 94  | 4.833565 | 1926 | 32.1     | 17.411   | 18.94183 | Stalled      | chr16:57302112-57608980   | 304.869  |
| Cited2        | 289 | 64  | 4.816897 | 199  | 3.316667 | 36.0248  | 3.551682 | Stalled      | chr10:17441033-17445479   | 2.447    |
| 4931408C20Rik | 289 | 147 | 4.816897 | 7    | 0.116667 | 0.020719 | 0.399657 | Unclassified | chr1:26738646-26746305    | 5.66     |
| Lipe          | 289 | 0   | 4.816897 | 656  | 10.93333 | 7.60344  | 1.680998 | Elongating   | chr7:26164545-26183006    | 16.462   |
| Arid3b        | 289 | 68  | 4.816897 | 1148 | 19.13333 | 10.0955  | 1.363559 | Elongating   | chr9:57638315-57684041    | 43.727   |
| Ly86          | 289 | 0   | 4.816897 | 1415 | 23.58333 | 63.7355  | 13.92575 | Stalled      | chr13:37435213-37510904   | 73.692   |
| Slc25a42      | 288 | 0   | 4.80023  | 188  | 3.133333 | 2.31888  | 13.9138  | Stalled      | chr8:72708238-72738180    | 27.943   |
| Dot1l         | 288 | 0   | 4.80023  | 2108 | 35.13333 | 17.2682  | 3.696745 | Stalled      | chr10:80215950-80257092   | 39.143   |
| Src           | 288 | 0   | 4.80023  | 474  | 7.9      | 1.1294   | 0.894194 | Stalled      | chr2:157248028-157297574  | 47.547   |
| Ogdh          | 288 | 0   | 4.80023  | 767  | 12.78333 | 20.0147  | 31.91273 | Stalled      | chr11:6189599-6259096     | 67.498   |
| Commd1        | 288 | 0   | 4.80023  | 483  | 8.05     | 34.9189  | 29.90394 | Stalled      | chr11:22799727-22884284   | 82.558   |
| Egflam        | 288 | 0   | 4.80023  | 181  | 3.016667 | 0.092501 | 0        | Unclassified | chr15:7156119-7350304     | 192.186  |
| Imp2l         | 288 | 0   | 4.80023  | 4057 | 67.61667 | 5.31651  | 118.2754 | Stalled      | chr12:41748676-43056573   | 1305.898 |
| Dusp4         | 287 | 63  | 4.783563 | 585  | 9.75     | 11.9798  | 6.189181 | Stalled      | chr8:35868663-35882948    | 12.286   |
| Slc4a8        | 287 | 0   | 4.783563 | 217  | 3.616667 | 1.39114  | 11.88316 | Stalled      | chr15:100590177-100654402 | 62.226   |
| Mcl1          | 286 | 59  | 4.766895 | 484  | 8.066667 | 87.2033  | 4.897633 | Stalled      | chr3:95460642-95467101    | 4.46     |
| Aip           | 286 | 0   | 4.766895 | 348  | 5.8      | 40.8972  | 3.766334 | Stalled      | chr19:4114445-4127827     | 11.383   |
| Gusb          | 286 | 0   | 4.766895 | 257  | 4.283333 | 24.0668  | 9.304968 | Stalled      | chr5:130464890-130480698  | 13.809   |
| Twsg1         | 286 | 0   | 4.766895 | 863  | 14.38333 | 13.4908  | 4.997255 | Stalled      | chr17:66272405-66302527   | 28.123   |

|                      |     |     |          |      |            |          |          |              |                           |         |
|----------------------|-----|-----|----------|------|------------|----------|----------|--------------|---------------------------|---------|
| <b>Ramp1</b>         | 286 | 0   | 4.766895 | 113  | 1.883333   | 0.414961 | 1.127898 | Unclassified | chr1:93074398-93121773    | 45.376  |
| <b>Plekhl1</b>       | 286 | 0   | 4.766895 | 1133 | 18.883333  | 12.7931  | 10.73958 | Stalled      | chr11:103226405-103275978 | 47.574  |
| <b>Eef2k</b>         | 286 | 0   | 4.766895 | 420  | 7          | 4.24945  | 10.14271 | Stalled      | chr7:127984396-128047515  | 61.12   |
| <b>Entpd1</b>        | 286 | 0   | 4.766895 | 508  | 8.466667   | 1.94486  | 4.117287 | Stalled      | chr19:40732283-40816092   | 81.81   |
| <b>Camk1d</b>        | 286 | 0   | 4.766895 | 2308 | 38.46667   | 2.87345  | 18.1748  | Stalled      | chr2:5214502-5637710      | 421.209 |
| <b>Slc35b2</b>       | 285 | 0   | 4.750228 | 1076 | 17.933333  | 20.4745  | 0.847827 | Elongating   | chr17:45699100-45704618   | 3.519   |
| <b>Arhgdia</b>       | 285 | 0   | 4.750228 | 532  | 8.866667   | 179.771  | 2.910082 | Stalled      | chr11:120438548-120444934 | 4.387   |
| <b>C330016O10Rik</b> | 285 | 0   | 4.750228 | 165  | 2.75       | 6.87571  | 2.315316 | Elongating   | chr11:51456590-51466575   | 7.986   |
| <b>Pgf</b>           | 285 | 0   | 4.750228 | 71   | 1.183333   | 1.57606  | 4.664757 | Stalled      | chr12:86507590-86520235   | 10.646  |
| <b>Hyou1</b>         | 285 | 0   | 4.750228 | 760  | 12.66667   | 56.9245  | 8.649738 | Stalled      | chr9:44185572-44200451    | 12.88   |
| <b>Poidip3</b>       | 285 | 57  | 4.750228 | 897  | 14.95      | 41.0568  | 13.59559 | Stalled      | chr15:82956407-82981766   | 23.36   |
| <b>Nkd2</b>          | 285 | 0   | 4.750228 | 31   | 0.516667   | 0.258554 | 4.683132 | Unclassified | chr13:73956775-73987079   | 28.305  |
| <b>Rpl38</b>         | 284 | 0   | 4.73356  | 503  | 8.383333   | 120.691  | 2.040966 | Elongating   | chr11:114527856-114533645 | 3.79    |
| <b>F630110N24Rik</b> | 284 | 0   | 4.73356  | 216  | 3.6        | 6.50049  | 2.83882  | Stalled      | chr10:80818314-80826780   | 6.467   |
| <b>Kat5</b>          | 284 | 0   | 4.73356  | 346  | 5.766667   | 11.3443  | 4.19842  | Stalled      | chr19:5603417-5612029     | 6.613   |
| <b>Fasn</b>          | 284 | 0   | 4.73356  | 2112 | 35.2       | 55.4287  | 3.634519 | Stalled      | chr11:120667271-120687861 | 18.591  |
| <b>Lig1</b>          | 283 | 0   | 4.716893 | 291  | 4.85       | 6.86677  | 5.984798 | Stalled      | chr11:60511191-60527689   | 14.499  |
| <b>Infrg2</b>        | 283 | 0   | 4.716893 | 814  | 13.56667   | 24.1443  | 6.577595 | Stalled      | chr16:91545338-91564252   | 16.915  |
| <b>mmu-mir-181d</b>  | 282 | 0   | 4.700225 | 723  | 12.05      | ND       | ND       | Stalled      | chr8:86719832-86730841    | 11.01   |
| <b>Pascin2</b>       | 282 | 0   | 4.700225 | 1301 | 21.683333  | 16.8869  | 11.40401 | Stalled      | chr15:83206036-83297036   | 89.001  |
| <b>Dopey2</b>        | 282 | 0   | 4.700225 | 493  | 8.216667   | 2.07576  | 16.20655 | Stalled      | chr16:93710151-93810833   | 98.683  |
| <b>1110034A24Rik</b> | 281 | 68  | 4.683558 | 721  | 12.01667   | 53.4402  | 3.710038 | Stalled      | chr12:70290824-70301416   | 8.593   |
| <b>Ube2q1</b>        | 281 | 0   | 4.683558 | 371  | 6.183333   | 28.4071  | 6.763742 | Stalled      | chr3:89575530-89587919    | 10.39   |
| <b>Chrna4</b>        | 281 | 0   | 4.683558 | 27   | 0.45       | 0.050546 | 0        | Unclassified | chr2:180757015-180775882  | 16.868  |
| <b>Sf3a1</b>         | 281 | 0   | 4.683558 | 654  | 10.9       | 29.4757  | 6.464759 | Stalled      | chr11:4058356-4082544     | 22.189  |
| <b>Ankrd44</b>       | 281 | 99  | 4.683558 | 2377 | 39.61667   | 6.39159  | 9.379598 | Stalled      | chr1:54702183-54985202    | 281.02  |
| <b>Trim46</b>        | 280 | 0   | 4.66689  | 151  | 2.516667   | 1.50444  | 2.386762 | Elongating   | chr3:89038098-89051819    | 11.722  |
| <b>Mettl11a</b>      | 280 | 0   | 4.66689  | 537  | 8.95       | 12.9397  | 6.292899 | Stalled      | chr2:30661496-30678534    | 15.039  |
| <b>Xrcc1</b>         | 280 | 0   | 4.66689  | 438  | 7.3        | 40.1131  | 6.605129 | Stalled      | chr7:25330168-25358457    | 26.29   |
| <b>Gnptab</b>        | 280 | 49  | 4.66689  | 1085 | 18.083333  | 5.27463  | 7.610248 | Stalled      | chr10:87840156-87910074   | 67.919  |
| <b>Abhd2</b>         | 280 | 0   | 4.66689  | 604  | 10.06667   | 5.07193  | 16.42297 | Stalled      | chr7:86416151-86506487    | 88.337  |
| <b>Acot7</b>         | 280 | 0   | 4.66689  | 416  | 6.933333   | 16.0226  | 27.89484 | Stalled      | chr4:151550208-151645963  | 93.756  |
| <b>Apool</b>         | 279 | 94  | 4.650223 | 158  | 2.633333   | 6.79532  | 10.73706 | Stalled      | chrX:109423016-109486039  | 61.024  |
| <b>Ryr1</b>          | 279 | 0   | 4.650223 | 1076 | 17.933333  | 0.534732 | 0.504728 | Stalled      | chr7:29788358-29912170    | 121.813 |
| <b>Farp1</b>         | 279 | 0   | 4.650223 | 640  | 10.66667   | 0.174083 | 1.39296  | Unclassified | chr14:121432795-121682948 | 248.154 |
| <b>Ndufs7</b>        | 278 | 0   | 4.633555 | 181  | 3.016667   | 70.7326  | 6.127307 | Stalled      | chr10:79710196-79719537   | 7.342   |
| <b>Etfb</b>          | 278 | 0   | 4.633555 | 186  | 3.1        | 77.2618  | 12.60021 | Stalled      | chr7:50697512-50713152    | 13.641  |
| <b>Lmnb1</b>         | 278 | 0   | 4.633555 | 1322 | 22.033333  | 81.8268  | 12.82974 | Stalled      | chr18:56865466-56913079   | 45.614  |
| <b>Setd4</b>         | 277 | 0   | 4.616888 | 211  | 3.516667   | 5.51843  | 28.31692 | Stalled      | chr16:93583705-93606060   | 20.356  |
| <b>St8sia4</b>       | 277 | 247 | 4.616888 | 1223 | 20.383333  | 15.5996  | 24.12373 | Stalled      | chr1:97484260-97566171    | 79.912  |
| <b>Mdga2</b>         | 277 | 122 | 4.616888 | 342  | 5.7        | 0.034525 | 2.059596 | Unclassified | chr12:67572171-68324190   | 750.02  |
| <b>Ift140</b>        | 276 | 0   | 4.60022  | 1042 | 17.36667   | 13.2029  | 16.5645  | Stalled      | chr17:25151030-25236442   | 83.413  |
| <b>AI413582</b>      | 275 | 0   | 4.583553 | 450  | 7.5        | 18.6261  | 0.689729 | Elongating   | chr17:27700713-27704672   | 1.96    |
| <b>Fam43a</b>        | 275 | 0   | 4.583553 | 260  | 4.333333   | 22.8985  | 2.614051 | Stalled      | chr16:30597808-30602883   | 3.076   |
| <b>Lonp1</b>         | 275 | 0   | 4.583553 | 2025 | 33.75      | 40.1504  | 1.037163 | Elongating   | chr17:56753721-56768326   | 12.606  |
| <b>Snx32</b>         | 275 | 0   | 4.583553 | 920  | 15.333333  | 3.71997  | 0.821549 | Stalled      | chr19:5495277-5512489     | 15.213  |
| <b>Pcnx12</b>        | 275 | 0   | 4.583553 | 199  | 3.316667   | 0.053313 | 0.422832 | Unclassified | chr8:128275407-128424193  | 146.787 |
| <b>Srgap3</b>        | 275 | 0   | 4.583553 | 427  | 7.116667   | 0.415344 | 2.438703 | Unclassified | chr6:112667965-112899260  | 229.296 |
| <b>Pik1</b>          | 274 | 0   | 4.566885 | 237  | 3.95       | 45.5936  | 7.009901 | Stalled      | chr7:129300950-129313389  | 10.44   |
| <b>Map3k12</b>       | 274 | 0   | 4.566885 | 1268 | 21.133333  | 1.27584  | 0.599427 | Stalled      | chr15:102328077-102349435 | 19.359  |
| <b>Rap1gap</b>       | 274 | 0   | 4.566885 | 621  | 10.35      | 4.64327  | 0.423541 | Stalled      | chr4:137235617-137285782  | 48.166  |
| <b>Itm2c</b>         | 273 | 0   | 4.550218 | 307  | 5.116667   | 27.0345  | 3.542709 | Stalled      | chr1:87789084-87805273    | 14.19   |
| <b>Prodh</b>         | 273 | 0   | 4.550218 | 84   | 1.4        | 1.05804  | 3.93351  | Stalled      | chr16:18071818-18091283   | 17.466  |
| <b>Sphk2</b>         | 272 | 0   | 4.533551 | 424  | 7.066667   | 18.61    | 7.913211 | Stalled      | chr7:52965630-52975285    | 7.656   |
| <b>Nacad</b>         | 272 | 0   | 4.533551 | 274  | 4.566667   | 0.41378  | 0.282908 | Stalled      | chr11:6497825-6508057     | 8.233   |
| <b>Man2c1</b>        | 272 | 0   | 4.533551 | 538  | 8.966667   | 12.731   | 8.619171 | Stalled      | chr9:56976583-56990017    | 11.435  |
| <b>Tex22</b>         | 272 | 0   | 4.533551 | 30   | 0.6        | 7.56554  | 69.5202  | Stalled      | chr12:114310712-114327125 | 14.414  |
| <b>Xrcc6</b>         | 272 | 0   | 4.533551 | 544  | 9.066667   | 15.3498  | 19.0405  | Stalled      | chr15:81844798-81870514   | 23.717  |
| <b>Picd3</b>         | 272 | 0   | 4.533551 | 741  | 12.35      | 4.11988  | 1.613925 | Elongating   | chr11:102931609-102964972 | 31.364  |
| <b>Cldn10a</b>       | 272 | 0   | 4.533551 | 183  | 3.05       | 4.69197  | 0        | Unclassified | chr14:119185092-119273746 | 86.655  |
| <b>D18Erd653e</b>    | 272 | 0   | 4.533551 | 635  | 10.583333  | 0.930079 | 3.359783 | Unclassified | chr18:68090910-68415203   | 322.294 |
| <b>Snd1</b>          | 272 | 0   | 4.533551 | 7424 | 123.733333 | 57.6349  | 20.60458 | Stalled      | chr6:28428347-28838832    | 408.486 |
| <b>Junb</b>          | 271 | 0   | 4.516883 | 460  | 7.666667   | 139.757  | 1.069599 | Elongating   | chr8:87500810-87504617    | 1.808   |
| <b>Lrdd</b>          | 271 | 0   | 4.516883 | 72   | 1.2        | 7.54248  | 2.634213 | Stalled      | chr7:148624413-148631254  | 4.842   |
| <b>Nol9</b>          | 271 | 0   | 4.516883 | 799  | 13.1667    | 20.6982  | 6.426823 | Stalled      | chr4:151411435-151435603  | 22.169  |
| <b>Pqic1</b>         | 271 | 0   | 4.516883 | 281  | 4.683333   | 10.034   | 18.35813 | Stalled      | chr18:80451044-80489463   | 36.42   |
| <b>Clstn1</b>        | 271 | 0   | 4.516883 | 304  | 5.066667   | 2.32826  | 2.316134 | Unclassified | chr4:148958746-149022008  | 61.263  |
| <b>Cd44</b>          | 271 | 49  | 4.516883 | 4583 | 76.383333  | 27.365   | 5.441345 | Stalled      | chr2:102651299-102743822  | 90.524  |
| <b>AI118078</b>      | 271 | 0   | 4.516883 | 274  | 4.566667   | 0.074545 | 20.67806 | Stalled      | chr9:55172755-55286151    | 111.397 |
| <b>Spata2L</b>       | 270 | 0   | 4.500216 | 42   | 0.7        | 2.74621  | 1.905034 | Elongating   | chr8:125756157-125762109  | 3.953   |
| <b>Tbxa2r</b>        | 270 | 0   | 4.500216 | 131  | 2.183333   | 5.73585  | 4.308349 | Stalled      | chr10:80789475-80797917   | 6.443   |
| <b>Prdm1</b>         | 270 | 308 | 4.500216 | 1040 | 17.333333  | 6.60794  | 2.8048   | Elongating   | chr10:44156980-44180493   | 21.514  |
| <b>Rab43</b>         | 270 | 0   | 4.500216 | 602  | 10.033333  | 22.7707  | 10.82468 | Stalled      | chr6:87738846-87763773    | 22.928  |
| <b>Bin3</b>          | 270 | 0   | 4.500216 | 801  | 13.35      | 11.9413  | 7.429733 | Stalled      | chr14:70497951-70538013   | 38.063  |
| <b>Fam129b</b>       | 270 | 0   | 4.500216 | 289  | 4.816667   | 1.61111  | 3.711267 | Stalled      | chr2:32729653-32780773    | 49.121  |
| <b>Med22</b>         | 269 | 0   | 4.483548 | 84   | 1.4        | 10.7972  | 20.55348 | Stalled      | chr2:26760786-26768162    | 5.377   |
| <b>Cxcr7</b>         | 269 | 0   | 4.483548 | 227  | 3.783333   | 3.5028   | 6.962986 | Stalled      | chr1:92098577-92112863    | 12.287  |
| <b>Mzf1</b>          | 269 | 0   | 4.483548 | 60   | 1          | 2.15071  | 12.03035 | Stalled      | chr7:13627651-13642113    | 12.463  |
| <b>Msh5</b>          | 269 | 0   | 4.483548 | 172  | 2.866667   | 2.55103  | 26.35591 | Stalled      | chr17:35165551-35185551   | 18.001  |
| <b>Ptprv</b>         | 269 | 0   | 4.483548 | 279  | 4.65       | 0.830473 | 16.04411 | Stalled      | chr1:137005074-137031152  | 24.079  |
| <b>Trp73</b>         | 269 | 0   | 4.483548 | 312  | 5.2        | 1.37201  | 2.94068  | Unclassified | chr4:153430357-153516317  | 83.961  |
| <b>Bsn</b>           | 269 | 0   | 4.483548 | 502  | 8.366667   | 0.51984  | 0.470451 | Stalled      | chr9:107998352-108094714  | 94.363  |
| <b>Dusp1</b>         | 268 | 0   | 4.466881 | 50   | 0.833333   | 12.2593  | 16.06966 | Stalled      | chr17:26642536-26647417   | 2.882   |
| <b>Rbm15</b>         | 268 | 0   | 4.466881 | 255  | 4.25       | 13.2686  | 9.537229 | Stalled      | chr3:107129027-107138207  | 7.181   |
| <b>Hspa12a</b>       | 268 | 0   | 4.466881 | 178  | 2.966667   | 0.393268 | 3.182117 | Unclassified | chr19:58870240-58937474   | 65.235  |
| <b>Cdt1</b>          | 267 | 0   | 4.450213 | 504  | 8.4        | 20.3287  | 6.020131 | Stalled      | chr8:125089914-125097030  | 5.117   |

|                      |     |    |          |      |          |          |          |              |                           |         |
|----------------------|-----|----|----------|------|----------|----------|----------|--------------|---------------------------|---------|
| <b>BC017643</b>      | 267 | 0  | 4.450213 | 346  | 5.766667 | 0        | 4.052508 | Stalled      | chr11:121083902-121092579 | 6.678   |
| <b>H2-Ob</b>         | 267 | 0  | 4.450213 | 412  | 6.866667 | 58.0508  | 1.767    | Elongating   | chr17:34373849-34382853   | 7.005   |
| <b>Arf1</b>          | 267 | 0  | 4.450213 | 786  | 13.1     | 105.773  | 8.448198 | Stalled      | chr11:59024913-59043664   | 16.752  |
| <b>Dhx34</b>         | 267 | 0  | 4.450213 | 376  | 6.266667 | 3.74816  | 11.01866 | Stalled      | chr7:16782569-16809381    | 24.813  |
| <b>Znfx1</b>         | 267 | 0  | 4.450213 | 848  | 14.13333 | 10.0423  | 21.29464 | Stalled      | chr2:166861296-166890515  | 27.22   |
| <b>Hcls1</b>         | 267 | 0  | 4.450213 | 761  | 12.68333 | 210.345  | 7.289413 | Stalled      | chr16:36933068-36963298   | 28.231  |
| <b>Rgs8</b>          | 267 | 0  | 4.450213 | 105  | 1.75     | 0.103785 | 0        | Unclassified | chr1:155498166-155544795  | 44.63   |
| <b>Cradd</b>         | 267 | 82 | 4.450213 | 3684 | 61.4     | 4.53556  | 7.045344 | Stalled      | chr10:94637379-94788731   | 149.353 |
| <b>Fkbp2</b>         | 266 | 0  | 4.433546 | 258  | 4.3      | 84.0702  | 3.497615 | Stalled      | chr19:7052230-7056930     | 2.701   |
| <b>Capg</b>          | 266 | 0  | 4.433546 | 508  | 8.466667 | 150.225  | 4.806823 | Stalled      | chr6:72492432-72512974    | 18.543  |
| <b>Vps37c</b>        | 266 | 0  | 4.433546 | 402  | 6.7      | 5.62406  | 17.36123 | Stalled      | chr19:10761304-10788909   | 25.606  |
| <b>Grap2</b>         | 266 | 0  | 4.433546 | 401  | 6.683333 | 10.9003  | 0.725847 | Stalled      | chr15:80451912-80480728   | 26.817  |
| <b>Unc119</b>        | 265 | 0  | 4.416878 | 88   | 1.466667 | 10.105   | 4.203808 | Stalled      | chr11:78155023-78162658   | 5.636   |
| <b>Dnajc17</b>       | 265 | 0  | 4.416878 | 345  | 5.75     | 7.19961  | 22.73541 | Stalled      | chr2:118998242-119036531  | 36.29   |
| <b>Myo7a</b>         | 265 | 0  | 4.416878 | 425  | 7.083333 | 3.03945  | 0.410826 | Stalled      | chr7:105199569-105270003  | 68.435  |
| <b>Ify122</b>        | 265 | 0  | 4.416878 | 254  | 4.233333 | 1.75639  | 25.88884 | Stalled      | chr6:115801545-115876717  | 73.173  |
| <b>Tha1</b>          | 264 | 0  | 4.400211 | 386  | 6.433333 | 4.4714   | 1.289598 | Elongating   | chr11:117729262-117736840 | 5.579   |
| <b>Gnb2l1</b>        | 264 | 0  | 4.400211 | 654  | 10.9     | 1016.77  | 5.187719 | Stalled      | chr11:48611861-48619743   | 5.883   |
| <b>Trim41</b>        | 264 | 0  | 4.400211 | 1482 | 24.7     | 22.4432  | 2.450403 | Elongating   | chr11:48619905-48632893   | 10.989  |
| <b>Itgb7</b>         | 264 | 0  | 4.400211 | 162  | 2.7      | 4.27464  | 2.280035 | Elongating   | chr15:102046425-102064366 | 15.942  |
| <b>Itfg3</b>         | 264 | 0  | 4.400211 | 69   | 1.15     | 2.6811   | 17.75058 | Stalled      | chr17:26349657-26383086   | 31.43   |
| <b>Zfp362</b>        | 264 | 0  | 4.400211 | 1443 | 24.05    | 21.4972  | 2.388556 | Elongating   | chr4:128450328-128485356  | 33.029  |
| <b>Ndufs8</b>        | 263 | 0  | 4.383543 | 107  | 1.783333 | 72.492   | 8.84404  | Stalled      | chr19:3908869-3914717     | 3.849   |
| <b>Ndufa13</b>       | 263 | 0  | 4.383543 | 228  | 3.8      | 57.0164  | 5.579468 | Stalled      | chr8:72418080-72428457    | 8.378   |
| <b>Dbnl</b>          | 263 | 89 | 4.383543 | 461  | 7.683333 | 53.5262  | 12.65501 | Stalled      | chr11:5686485-5700983     | 12.499  |
| <b>Actr1a</b>        | 263 | 0  | 4.383543 | 271  | 4.516667 | 38.4974  | 7.692195 | Stalled      | chr19:46451303-46472225   | 18.923  |
| <b>Zmat5</b>         | 263 | 0  | 4.383543 | 224  | 3.733333 | 16.0931  | 29.9918  | Stalled      | chr11:4602680-4637669     | 32.99   |
| <b>Tfdp1</b>         | 263 | 0  | 4.383543 | 2734 | 45.56667 | 51.1239  | 1.563502 | Elongating   | chr8:13337673-13377702    | 38.03   |
| <b>Cdk5rap3</b>      | 262 | 0  | 4.366876 | 164  | 2.733333 | 22.7386  | 11.38656 | Stalled      | chr11:96769099-96779795   | 8.697   |
| <b>1700029H14Rik</b> | 262 | 0  | 4.366876 | 83   | 1.383333 | 0.1166   | 4.345487 | Stalled      | chr8:13550732-13564448    | 11.717  |
| <b>Srgn</b>          | 262 | 0  | 4.366876 | 971  | 16.18333 | 138.131  | 3.347652 | Stalled      | chr10:61957175-61972503   | 13.329  |
| <b>Tle2</b>          | 262 | 0  | 4.366876 | 25   | 0.416667 | 1.75285  | 7.646318 | Stalled      | chr10:81036276-81053590   | 15.315  |
| <b>Sic15a4</b>       | 262 | 0  | 4.366876 | 1054 | 17.56667 | 13.586   | 6.017463 | Stalled      | chr5:128076035-128099762  | 21.728  |
| <b>Upb1</b>          | 262 | 0  | 4.366876 | 127  | 2.116667 | 0.741293 | 0.808303 | Unclassified | chr10:74867778-74902940   | 33.163  |
| <b>Chst15</b>        | 262 | 0  | 4.366876 | 385  | 6.416667 | 1.77877  | 13.40574 | Stalled      | chr7:139427937-139510838  | 80.902  |
| <b>Erp29</b>         | 261 | 0  | 4.350208 | 774  | 12.9     | 147.565  | 4.589796 | Stalled      | chr5:121894761-121904483  | 7.723   |
| <b>Per1</b>          | 261 | 0  | 4.350208 | 467  | 7.783333 | 7.82929  | 3.144962 | Stalled      | chr11:68910457-68923457   | 11.001  |
| <b>Stambp</b>        | 261 | 0  | 4.350208 | 275  | 4.583333 | 3.01318  | 10.72996 | Stalled      | chr6:83493200-83524498    | 29.299  |
| <b>Arhgap25</b>      | 261 | 0  | 4.350208 | 1618 | 26.96667 | 40.7318  | 3.496328 | Stalled      | chr6:87409378-87448294    | 36.917  |
| <b>Add1</b>          | 261 | 0  | 4.350208 | 320  | 5.333333 | 25.2078  | 51.70654 | Stalled      | chr5:34914362-34974954    | 58.593  |
| <b>Arhgef3</b>       | 261 | 0  | 4.350208 | 1117 | 18.61667 | 3.63536  | 9.003032 | Stalled      | chr14:28049224-28217090   | 165.867 |
| <b>Fam40a</b>        | 260 | 0  | 4.333541 | 254  | 4.233333 | 11.62    | 13.09163 | Stalled      | chr3:107415449-107436628  | 19.18   |
| <b>Lrrc50</b>        | 260 | 0  | 4.333541 | 208  | 3.466667 | 1.93184  | 9.65203  | Stalled      | chr8:122097134-122122354  | 23.221  |
| <b>Nacc2</b>         | 260 | 0  | 4.333541 | 146  | 2.433333 | 0.460893 | 1.873316 | Unclassified | chr2:25911055-25980331    | 67.277  |
| <b>Dscaml1</b>       | 260 | 0  | 4.333541 | 519  | 8.65     | 0.026061 | 2.299122 | Unclassified | chr9:45236375-45561796    | 323.422 |
| <b>Ddit4</b>         | 259 | 0  | 4.316874 | 98   | 1.633333 | 88.7014  | 4.693664 | Stalled      | chr10:59412422-59416518   | 2.097   |
| <b>Mrp121</b>        | 259 | 0  | 4.316874 | 203  | 3.383333 | 20.7742  | 9.381809 | Stalled      | chr19:3281046-3292837     | 9.792   |
| <b>Rinl</b>          | 259 | 0  | 4.316874 | 278  | 4.633333 | 6.91136  | 1.692651 | Elongating   | chr7:29571987-29583982    | 9.996   |
| <b>Klhdc5</b>        | 259 | 0  | 4.316874 | 259  | 4.316667 | 6.21084  | 10.36342 | Stalled      | chr6:147037596-147061300  | 21.705  |
| <b>Fam83g</b>        | 259 | 0  | 4.316874 | 175  | 2.916667 | 1.38475  | 9.101382 | Stalled      | chr11:61495911-61523452   | 25.542  |
| <b>Tsc2</b>          | 259 | 0  | 4.316874 | 305  | 5.083333 | 6.1113   | 13.09606 | Stalled      | chr17:24732881-24771574   | 36.694  |
| <b>Letm1</b>         | 259 | 0  | 4.316874 | 403  | 6.716667 | 20.3933  | 23.21005 | Stalled      | chr5:34084000-34127353    | 41.354  |
| <b>Trappc3</b>       | 258 | 0  | 4.300206 | 106  | 1.766667 | 32.4835  | 13.79878 | Stalled      | chr4:125937648-125953127  | 13.48   |
| <b>Cep250</b>        | 258 | 0  | 4.300206 | 500  | 8.333333 | 8.78757  | 14.05261 | Stalled      | chr2:155780293-155824636  | 42.344  |
| <b>Cep164</b>        | 258 | 0  | 4.300206 | 370  | 6.166667 | 4.07899  | 9.441734 | Stalled      | chr9:45575028-45638721    | 61.694  |
| <b>Thbd</b>          | 257 | 0  | 4.283539 | 9    | 0.15     | 1.12012  | 3.712262 | Unclassified | chr2:148230206-148235924  | 3.719   |
| <b>Psmb9</b>         | 257 | 0  | 4.283539 | 388  | 6.466667 | 152.426  | 5.633453 | Stalled      | chr17:34319043-34326275   | 5.233   |
| <b>Gnb3</b>          | 257 | 0  | 4.283539 | 208  | 3.466667 | 1.27727  | 4.072876 | Stalled      | chr6:124784257-124792293  | 6.037   |
| <b>Snx33</b>         | 257 | 0  | 4.283539 | 68   | 1.133333 | 3.93357  | 9.499815 | Stalled      | chr9:56765006-56781878    | 11.173  |
| <b>Trpm5</b>         | 257 | 0  | 4.283539 | 177  | 2.95     | 0.046786 | 0.333199 | Stalled      | chr7:150257433-150282547  | 23.115  |
| <b>Bend5</b>         | 257 | 0  | 4.283539 | 1256 | 20.93333 | 20.0982  | 4.932966 | Stalled      | chr4:111085610-111132530  | 44.921  |
| <b>4930572J05Rik</b> | 256 | 0  | 4.266871 | 61   | 1.016667 | 23.8366  | 4.679337 | Stalled      | chr15:74549663-74554803   | 3.141   |
| <b>Ino80e</b>        | 256 | 0  | 4.266871 | 403  | 6.716667 | 39.4396  | 3.790965 | Stalled      | chr7:133995946-134006977  | 9.032   |
| <b>Scn2b</b>         | 256 | 0  | 4.266871 | 50   | 0.833333 | 0.219131 | 0.365906 | Unclassified | chr9:44923958-44938153    | 12.196  |
| <b>Dbn1</b>          | 256 | 0  | 4.266871 | 69   | 1.15     | 0.274813 | 0.812243 | Unclassified | chr13:55575147-55591529   | 14.383  |
| <b>Cage1</b>         | 256 | 0  | 4.266871 | 145  | 2.416667 | 0.941717 | 49.04635 | Stalled      | chr13:38097920-38130806   | 30.887  |
| <b>Galnt6</b>        | 256 | 0  | 4.266871 | 545  | 9.083333 | 3.56962  | 6.32835  | Stalled      | chr15:100520346-100561807 | 39.462  |
| <b>Lfng</b>          | 255 | 0  | 4.250204 | 523  | 8.716667 | 26.0064  | 3.696737 | Stalled      | chr5:141081294-141091499  | 8.206   |
| <b>Gimap8</b>        | 255 | 57 | 4.250204 | 391  | 6.516667 | 27.4124  | 3.696023 | Stalled      | chr6:48595232-48610874    | 13.643  |
| <b>Orai1</b>         | 255 | 0  | 4.250204 | 307  | 5.116667 | 10.6682  | 15.61584 | Stalled      | chr5:123463082-123480461  | 15.38   |
| <b>Ncf2</b>          | 255 | 0  | 4.250204 | 883  | 14.71667 | 17.7115  | 2.775957 | Elongating   | chr1:154653019-154684120  | 29.102  |
| <b>Snx9</b>          | 255 | 0  | 4.250204 | 1495 | 24.91667 | 21.602   | 12.9989  | Stalled      | chr17:5839379-5930711     | 89.333  |
| <b>Nsmce2</b>        | 255 | 88 | 4.250204 | 1644 | 27.4     | 12.6296  | 14.89339 | Stalled      | chr15:59203752-59433238   | 227.487 |
| <b>Socs1</b>         | 254 | 0  | 4.233536 | 227  | 3.783333 | 62.6626  | 2.320851 | Unclassified | chr16:10783901-10787629   | 1.729   |
| <b>Tnf</b>           | 254 | 0  | 4.233536 | 390  | 6.5      | 12.6234  | 1.71941  | Elongating   | chr17:35336335-35340941   | 2.607   |
| <b>Pfn1</b>          | 254 | 15 | 4.233536 | 480  | 8        | 1151.48  | 2.350097 | Stalled      | chr11:70465350-70470152   | 2.803   |
| <b>Fam100a</b>       | 254 | 0  | 4.233536 | 265  | 4.416667 | 25.6775  | 4.677381 | Stalled      | chr16:4874779-4881851     | 5.073   |
| <b>Myi4</b>          | 254 | 0  | 4.233536 | 340  | 5.666667 | 14.0622  | 17.98929 | Stalled      | chr11:104409976-104448533 | 36.558  |
| <b>Chid1</b>         | 254 | 0  | 4.233536 | 224  | 3.733333 | 4.22846  | 55.26198 | Stalled      | chr7:148679035-148727756  | 46.722  |
| <b>Cdc42se2</b>      | 254 | 71 | 4.233536 | 1289 | 21.48333 | 26.0707  | 17.03823 | Stalled      | chr11:54530916-54603205   | 70.29   |
| <b>Grccl0</b>        | 253 | 53 | 4.216869 | 27   | 0.45     | 143.199  | 30.70707 | Unclassified | chr6:124689201-124693097  | 1.897   |
| <b>Gpr152</b>        | 253 | 0  | 4.216869 | 55   | 0.916667 | 0.568217 | 0.412308 | Stalled      | chr19:4137798-4145740     | 5.943   |
| <b>Gfi1</b>          | 253 | 0  | 4.216869 | 101  | 1.683333 | 3.07948  | 5.840358 | Stalled      | chr5:108145673-108155363  | 7.691   |
| <b>Cstf1</b>         | 253 | 0  | 4.216869 | 300  | 5        | 17.2504  | 7.96556  | Stalled      | chr2:172194502-172206586  | 10.085  |
| <b>1300014I06Rik</b> | 253 | 0  | 4.216869 | 858  | 14.3     | 9.41826  | 6.840257 | Stalled      | chr13:34719709-34746550   | 24.842  |
| <b>Trim14</b>        | 253 | 0  | 4.216869 | 737  | 12.28333 | 12.3211  | 11.46309 | Stalled      | chr4:46519718-46551016    | 29.299  |



|               |     |     |          |      |          |          |          |              |                           |         |
|---------------|-----|-----|----------|------|----------|----------|----------|--------------|---------------------------|---------|
| Hps4          | 253 | 0   | 4.216869 | 312  | 5.2      | 6.67508  | 16.65302 | Stalled      | chr5:112770114-112807443  | 35.33   |
| Slc25a37      | 253 | 0   | 4.216869 | 500  | 8.333333 | 6.6966   | 8.649441 | Stalled      | chr14:69859907-69905160   | 43.254  |
| Uck2          | 253 | 0   | 4.216869 | 2009 | 33.48333 | 38.8509  | 8.592544 | Stalled      | chr1:169156216-169217258  | 59.043  |
| Acap2         | 253 | 0   | 4.216869 | 913  | 15.21667 | 6.62005  | 26.08989 | Stalled      | chr16:31092498-31203324   | 108.827 |
| 8430427H17Rik | 253 | 0   | 4.216869 | 414  | 6.9      | 0.588508 | 0.68072  | Unclassified | chr2:153233197-153357707  | 122.511 |
| Cugbp2        | 253 | 55  | 4.216869 | 2432 | 40.53333 | 6.49477  | 0.260359 | Unclassified | chr2:6460743-7319825      | 857.083 |
| Tssk6         | 252 | 0   | 4.200201 | 77   | 1.283333 | 6.70737  | 0.804864 | Unclassified | chr8:72424113-72427417    | 1.305   |
| Bet1l         | 252 | 0   | 4.200201 | 71   | 1.183333 | 12.2449  | 8.634334 | Stalled      | chr7:148039282-148044282  | 3.001   |
| Irf7          | 252 | 0   | 4.200201 | 226  | 3.766667 | 19.9211  | 1.50372  | Elongating   | chr7:148449087-148454300  | 3.214   |
| Mrpl49        | 252 | 62  | 4.200201 | 510  | 8.5      | 17.4361  | 3.23789  | Stalled      | chr19:6053629-6059751     | 4.123   |
| Rrp9          | 252 | 0   | 4.200201 | 277  | 4.616667 | 36.0933  | 3.327481 | Stalled      | chr9:106377639-106387746  | 8.108   |
| Itprlp        | 252 | 0   | 4.200201 | 711  | 11.85    | 8.6119   | 6.001225 | Stalled      | chr19:47969085-47995789   | 24.705  |
| Ip6k1         | 252 | 0   | 4.200201 | 783  | 13.05    | 23.0232  | 16.35094 | Stalled      | chr9:107902978-107951113  | 46.136  |
| Tom1l2        | 252 | 46  | 4.200201 | 512  | 8.533333 | 3.26212  | 16.30749 | Stalled      | chr11:60040215-60168407   | 126.193 |
| Ric8          | 251 | 0   | 4.183534 | 101  | 1.683333 | 14.325   | 16.30868 | Stalled      | chr7:148041295-148049630  | 6.336   |
| Tgif1         | 251 | 0   | 4.183534 | 530  | 8.833333 | 22.3635  | 3.809106 | Stalled      | chr17:71193546-71202550   | 7.005   |
| Elk4          | 251 | 0   | 4.183534 | 677  | 11.28333 | 4.92559  | 11.00046 | Stalled      | chr1:133902181-133922261  | 18.081  |
| BC004004      | 251 | 0   | 4.183534 | 825  | 13.75    | 13.0029  | 10.95522 | Stalled      | chr17:29403732-29439832   | 34.101  |
| Wdr1          | 251 | 0   | 4.183534 | 2001 | 33.35    | 60.7397  | 6.292627 | Stalled      | chr5:38918051-38954834    | 34.784  |
| Dusp22        | 251 | 204 | 4.183534 | 788  | 13.13333 | 2.94222  | 27.33447 | Stalled      | chr13:30749964-30803094   | 51.131  |
| Hipk1         | 251 | 0   | 4.183534 | 578  | 9.633333 | 7.40383  | 24.24892 | Stalled      | chr3:103543737-103597198  | 51.462  |
| Ascc1         | 251 | 0   | 4.183534 | 383  | 6.383333 | 11.1085  | 84.88179 | Stalled      | chr10:59463586-59562734   | 97.149  |
| Clasp1        | 251 | 0   | 4.183534 | 3873 | 64.55    | 8.3887   | 16.35195 | Stalled      | chr1:120283634-120506039  | 220.406 |
| Gadd45g       | 250 | 90  | 4.166866 | 433  | 7.216667 | 115.4    | 1.068283 | Elongating   | chr13:51940043-51943841   | 1.799   |
| Wdr83         | 250 | 0   | 4.166866 | 307  | 5.116667 | 19.7513  | 2.071396 | Elongating   | chr8:87598933-87606645    | 5.713   |
| Guk1          | 250 | 0   | 4.166866 | 123  | 2.05     | 15.1156  | 11.45889 | Stalled      | chr11:58997356-59007454   | 8.099   |
| Map2k2        | 250 | 0   | 4.166866 | 761  | 12.68333 | 42.1846  | 13.4949  | Stalled      | chr10:80566691-80587442   | 18.752  |
| Dazap1        | 250 | 0   | 4.166866 | 937  | 15.61667 | 67.9172  | 5.399014 | Stalled      | chr10:79725735-79751158   | 23.424  |
| Ndufb10       | 249 | 0   | 4.150199 | 495  | 8.25     | 112.969  | 0.562442 | Stalled      | chr17:24859011-24863333   | 2.323   |
| Dalrd3        | 249 | 0   | 4.150199 | 118  | 1.966667 | 24.1442  | 3.561757 | Stalled      | chr9:108470222-108475102  | 2.881   |
| Slc25a19      | 249 | 0   | 4.150199 | 1313 | 21.88333 | 86.504   | 3.779999 | Stalled      | chr11:115476296-115491453 | 13.158  |
| Cicn4-2       | 249 | 70  | 4.150199 | 275  | 4.583333 | 7.6206   | 8.788298 | Stalled      | chr7:7235026-7254222      | 17.197  |
| Rcc2          | 249 | 0   | 4.150199 | 1836 | 30.6     | 134.956  | 2.480521 | Elongating   | chr4:140255456-140277390  | 19.935  |
| Dap           | 249 | 0   | 4.150199 | 613  | 10.21667 | 20.239   | 5.324773 | Stalled      | chr15:31152139-31204093   | 49.955  |
| Flt3          | 249 | 0   | 4.150199 | 905  | 15.08333 | 15.1342  | 13.83825 | Stalled      | chr5:148142316-148214065  | 69.75   |
| Lrrk1         | 249 | 0   | 4.150199 | 1611 | 26.85    | 6.16807  | 11.67982 | Stalled      | chr7:73403632-73535227    | 129.596 |
| Mbd4          | 248 | 0   | 4.133531 | 150  | 2.5      | 4.93694  | 9.726254 | Stalled      | chr6:115790714-115805359  | 12.646  |
| Uckl1         | 248 | 0   | 4.133531 | 270  | 4.5      | 13.0239  | 8.179288 | Stalled      | chr2:181303858-181318678  | 12.821  |
| Caskin1       | 248 | 0   | 4.133531 | 202  | 3.666667 | 0.238936 | 0.172987 | Stalled      | chr17:24623727-24645852   | 20.126  |
| Arhgap30      | 248 | 60  | 4.133531 | 1237 | 20.61667 | 75.9064  | 7.048494 | Stalled      | chr1:173317090-173340368  | 21.279  |
| Tmem201       | 248 | 0   | 4.133531 | 377  | 6.283333 | 4.59826  | 4.996799 | Stalled      | chr4:149089492-149114143  | 22.652  |
| AI413782      | 248 | 0   | 4.133531 | 141  | 2.35     | 8.35938  | 41.96722 | Stalled      | chr12:88579824-88609236   | 27.413  |
| Tmco3         | 248 | 0   | 4.133531 | 182  | 3.033333 | 3.86477  | 35.34028 | Stalled      | chr8:13286012-13322924    | 34.913  |
| Dkk3          | 248 | 0   | 4.133531 | 199  | 3.316667 | 2.87861  | 1.395287 | Unclassified | chr7:119259532-119304571  | 43.04   |
| Sipa1l2       | 248 | 0   | 4.133531 | 227  | 3.783333 | 0.708718 | 0.489933 | Unclassified | chr8:127941962-128018610  | 74.649  |
| Myom1         | 248 | 0   | 4.133531 | 140  | 2.333333 | 0.125583 | 1.294769 | Unclassified | chr17:17366896-71476196   | 107.301 |
| Lipc          | 248 | 0   | 4.133531 | 327  | 5.45     | 1.64784  | 0        | Unclassified | chr9:70645934-70784615    | 136.682 |
| Lrpc3         | 247 | 0   | 4.116864 | 375  | 6.25     | 177.155  | 4.300691 | Stalled      | chr5:122839936-122856187  | 14.252  |
| Acox3         | 247 | 0   | 4.116864 | 649  | 10.81667 | 10.4371  | 3.987685 | Stalled      | chr5:35923708-35956450    | 30.743  |
| Unk           | 247 | 77  | 4.116864 | 960  | 16       | 11.3449  | 9.989447 | Stalled      | chr11:115889635-115922508 | 30.874  |
| Itgb4         | 247 | 0   | 4.116864 | 489  | 8.15     | 0.340774 | 0.438607 | Stalled      | chr11:115834038-115869725 | 33.688  |
| Npc1          | 247 | 0   | 4.116864 | 342  | 5.7      | 4.22622  | 7.07166  | Stalled      | chr18:12348202-12396895   | 46.694  |
| Mocos         | 247 | 0   | 4.116864 | 69   | 1.15     | 1.71931  | 20.22448 | Stalled      | chr18:24810191-24860057   | 47.867  |
| Ak5           | 247 | 0   | 4.116864 | 410  | 6.833333 | 0.462364 | 0.332603 | Unclassified | chr3:152125778-152333104  | 205.327 |
| Ndufaf3       | 246 | 0   | 4.100196 | 90   | 1.5      | 23.7402  | 3.044077 | Unclassified | chr9:108468195-108471673  | 1.479   |
| Htra2         | 246 | 0   | 4.100196 | 133  | 2.216667 | 49.3924  | 8.088453 | Stalled      | chr6:83001262-83006565    | 3.304   |
| Rhdbf1        | 246 | 0   | 4.100196 | 165  | 2.75     | 1.19719  | 1.457753 | Elongating   | chr11:32109585-32124293   | 12.709  |
| Lbh           | 246 | 0   | 4.100196 | 433  | 7.216667 | 17.8957  | 22.76013 | Stalled      | chr17:73265644-73291286   | 23.643  |
| Tyk2          | 246 | 0   | 4.100196 | 409  | 6.816667 | 12.1128  | 12.94765 | Stalled      | chr9:20908511-20937719    | 27.209  |
| Nppla6        | 246 | 0   | 4.100196 | 283  | 4.716667 | 9.59736  | 6.458079 | Stalled      | chr8:3513383-3544267      | 28.885  |
| Recql5        | 246 | 0   | 4.100196 | 571  | 9.516667 | 8.33059  | 6.18644  | Stalled      | chr11:115753990-115796320 | 40.331  |
| Mfsd4         | 246 | 57  | 4.100196 | 600  | 10       | 3.15085  | 0.694633 | Stalled      | chr1:133923197-133966639  | 41.443  |
| Ahdcl1        | 246 | 0   | 4.100196 | 432  | 7.2      | 2.52706  | 8.569812 | Stalled      | chr4:132565420-132634025  | 66.606  |
| Tram2         | 246 | 228 | 4.100196 | 953  | 15.88333 | 7.86415  | 10.22119 | Stalled      | chr1:20991458-21071290    | 77.833  |
| Crip2         | 245 | 0   | 4.083529 | 18   | 0.3      | 1.71216  | 5.560395 | Stalled      | chr12:114376446-114383715 | 5.27    |
| Arl6ip1       | 245 | 0   | 4.083529 | 259  | 4.316667 | 65.128   | 20.57799 | Stalled      | chr7:125262404-125275139  | 10.736  |
| Ccdc134       | 245 | 0   | 4.083529 | 533  | 8.883333 | 23.6665  | 9.65244  | Stalled      | chr15:81956351-81972632   | 14.282  |
| Hsp90b1       | 245 | 203 | 4.083529 | 835  | 13.91667 | 429.065  | 8.897868 | Stalled      | chr10:86153585-86170189   | 14.605  |
| Tnk2          | 245 | 0   | 4.083529 | 319  | 5.316667 | 11.9174  | 3.076088 | Stalled      | chr16:32642728-32683579   | 38.852  |
| Rnf121        | 245 | 0   | 4.083529 | 338  | 5.633333 | 7.69822  | 20.61057 | Stalled      | chr7:109168385-109215646  | 45.262  |
| Runx3         | 245 | 0   | 4.083529 | 2031 | 33.85    | 22.2134  | 1.511695 | Elongating   | chr4:134674559-134733905  | 57.347  |
| Aprt          | 244 | 0   | 4.066862 | 132  | 2.2      | 85.6115  | 2.309742 | Stalled      | chr8:125098536-125102807  | 2.272   |
| Yipf2         | 244 | 0   | 4.066862 | 235  | 3.916667 | 13.508   | 3.464392 | Stalled      | chr9:21393125-21399190    | 4.066   |
| Dapk3         | 244 | 0   | 4.066862 | 540  | 9        | 26.8466  | 0.671119 | Stalled      | chr10:80644749-80655743   | 8.995   |
| Dph1          | 244 | 0   | 4.066862 | 440  | 7.333333 | 0        | 3.878825 | Stalled      | chr11:74991144-75005985   | 12.842  |
| S1pr3         | 244 | 0   | 4.066862 | 328  | 5.466667 | 3.22567  | 3.669301 | Stalled      | chr13:51502132-51518166   | 14.035  |
| Mfsd2a        | 244 | 0   | 4.066862 | 1013 | 16.88333 | 5.1117   | 5.392026 | Stalled      | chr4:122624097-122640431  | 14.335  |
| Ggt5          | 244 | 0   | 4.066862 | 129  | 2.15     | 0.210576 | 1.708925 | Unclassified | chr10:75050125-75079713   | 27.589  |
| Tcf25         | 244 | 0   | 4.066862 | 1156 | 19.26667 | 56.0205  | 11.46677 | Stalled      | chr8:125895652-125928073  | 30.422  |
| Tst           | 243 | 0   | 4.050194 | 14   | 0.233333 | 2.15132  | 11.54157 | Stalled      | chr15:78229985-78238289   | 6.305   |
| Ckap4         | 243 | 0   | 4.050194 | 215  | 3.583333 | 29.0534  | 4.754834 | Stalled      | chr10:83989049-83998633   | 7.585   |
| Fxyd5         | 243 | 0   | 4.050194 | 286  | 4.766667 | 59.6952  | 3.50345  | Stalled      | chr7:31817741-31829341    | 9.601   |
| Necap2        | 243 | 0   | 4.050194 | 525  | 8.75     | 47.629   | 5.176051 | Stalled      | chr4:140622427-140636260  | 11.834  |
| Prpf31        | 243 | 0   | 4.050194 | 577  | 9.616667 | 24.7559  | 3.184945 | Stalled      | chr7:3579586-3594084      | 12.499  |
| Atp6v0a1      | 243 | 61  | 4.050194 | 1071 | 17.85    | 13.3627  | 11.65406 | Stalled      | chr11:100868768-100925028 | 54.261  |
| Fkbp15        | 243 | 0   | 4.050194 | 878  | 14.63333 | 16.8479  | 20.97406 | Stalled      | chr4:61961375-62023582    | 60.208  |

|                      |     |     |          |      |           |          |          |              |                           |         |
|----------------------|-----|-----|----------|------|-----------|----------|----------|--------------|---------------------------|---------|
| <b>4922505G16Rik</b> | 243 | 0   | 4.050194 | 97   | 1.616667  | 1.58159  | 135.3903 | Stalled      | chr2:157034285-157107285  | 71.001  |
| <b>Crif2</b>         | 242 | 0   | 4.033527 | 358  | 5.966667  | 22.4115  | 1.199854 | Elongating   | chr5:109983729-109990012  | 4.284   |
| <b>3110062M04Rik</b> | 242 | 0   | 4.033527 | 291  | 4.85      | 4.19563  | 4.754489 | Stalled      | chr6:34821770-34830065    | 6.296   |
| <b>Ppif</b>          | 242 | 0   | 4.033527 | 154  | 2.566667  | 17.319   | 8.01528  | Stalled      | chr14:26511655-26519952   | 6.298   |
| <b>Sic29a3</b>       | 242 | 0   | 4.033527 | 875  | 14.583333 | 4.56233  | 12.15613 | Stalled      | chr10:60174819-60217530   | 40.712  |
| <b>4933407H18Rik</b> | 242 | 0   | 4.033527 | 228  | 3.8       | 2.648    | 47.82213 | Stalled      | chr5:33719344-33762403    | 41.06   |
| <b>Gng12</b>         | 242 | 0   | 4.033527 | 1577 | 26.28333  | 5.1163   | 6.334564 | Stalled      | chr6:66844449-66971288    | 124.84  |
| <b>Dock9</b>         | 242 | 0   | 4.033527 | 1161 | 19.35     | 3.47076  | 1.010577 | Stalled      | chr14:121941260-122140151 | 196.892 |
| <b>Rps17</b>         | 241 | 0   | 4.016859 | 255  | 4.25      | 181.232  | 2.074292 | Stalled      | chr7:88487618-88492120    | 2.503   |
| <b>Jun</b>           | 241 | 22  | 4.016859 | 241  | 4.016667  | 29.5693  | 4.696515 | Stalled      | chr4:94715726-94720913    | 3.188   |
| <b>Trappc5</b>       | 241 | 0   | 4.016859 | 274  | 4.566667  | 40.1065  | 2.931223 | Stalled      | chr8:3674476-3680921      | 4.446   |
| <b>Lrrc24</b>        | 241 | 0   | 4.016859 | 321  | 5.35      | 17.669   | 0.667677 | Stalled      | chr15:76545705-76554603   | 6.899   |
| <b>Fam110a</b>       | 241 | 0   | 4.016859 | 148  | 2.466667  | 7.32246  | 3.672196 | Stalled      | chr2:151795133-151807955  | 10.823  |
| <b>Hnrnpul2</b>      | 241 | 0   | 4.016859 | 290  | 4.833333  | 46.3584  | 15.20248 | Stalled      | chr19:8891890-8908632     | 14.743  |
| <b>Pank4</b>         | 241 | 0   | 4.016859 | 766  | 12.76667  | 15.4392  | 3.962589 | Stalled      | chr4:154336241-154355046  | 16.806  |
| <b>B3gnt2</b>        | 241 | 0   | 4.016859 | 684  | 11.4      | 7.97266  | 13.35486 | Stalled      | chr11:22734738-22761735   | 24.998  |
| <b>Rrp15</b>         | 241 | 0   | 4.016859 | 380  | 6.333333  | 38.8475  | 14.26401 | Stalled      | chr1:18854964-188575237   | 28.274  |
| <b>Mosc2</b>         | 241 | 0   | 4.016859 | 257  | 4.283333  | 25.6088  | 18.37873 | Stalled      | chr1:186636946-186671726  | 32.781  |
| <b>Mare</b>          | 241 | 0   | 4.016859 | 539  | 8.983333  | 7.59448  | 17.77871 | Stalled      | chr11:32132418-32169614   | 35.197  |
| <b>Snx1</b>          | 241 | 0   | 4.016859 | 314  | 5.233333  | 24.2432  | 20.8578  | Stalled      | chr9:65935933-65974693    | 36.761  |
| <b>Zcchc2</b>        | 241 | 0   | 4.016859 | 750  | 12.5      | 8.13652  | 14.37376 | Stalled      | chr1:107884982-107930654  | 43.673  |
| <b>Coro7</b>         | 241 | 0   | 4.016859 | 1487 | 24.78333  | 26.0917  | 6.198308 | Stalled      | chr16:4626883-4681720     | 52.838  |
| <b>Gramd3</b>        | 241 | 0   | 4.016859 | 1745 | 29.08333  | 22.7818  | 1.906984 | Elongating   | chr18:56589785-56663446   | 71.662  |
| <b>Sic3a2</b>        | 240 | 0   | 4.000192 | 521  | 8.683333  | 48.4853  | 4.886514 | Stalled      | chr19:8781371-8790387     | 7.017   |
| <b>BC005764</b>      | 240 | 0   | 4.000192 | 718  | 11.96667  | 0.586135 | 0.060906 | Stalled      | chr10:79327526-79339379   | 9.854   |
| <b>Tjp3</b>          | 240 | 0   | 4.000192 | 160  | 2.666667  | 1.19833  | 0.481987 | Stalled      | chr10:80735944-80756012   | 18.069  |
| <b>Man2b2</b>        | 240 | 0   | 4.000192 | 508  | 8.466667  | 14.2919  | 4.474344 | Stalled      | chr5:37198051-37223888    | 23.838  |
| <b>Sic2a1</b>        | 240 | 0   | 4.000192 | 700  | 11.66667  | 17.1928  | 14.78662 | Stalled      | chr4:118779349-118809934  | 28.586  |
| <b>Ezr</b>           | 240 | 0   | 4.000192 | 1542 | 25.7      | 60.577   | 12.49806 | Stalled      | chr17:6942479-6989129     | 44.651  |
| <b>Casp8</b>         | 240 | 0   | 4.000192 | 1098 | 18.3      | 27.6254  | 7.742193 | Stalled      | chr1:58850217-58904347    | 52.131  |
| <b>Phf2</b>          | 240 | 0   | 4.000192 | 869  | 14.48333  | 13.8449  | 6.398183 | Stalled      | chr13:48897119-48968254   | 69.136  |
| <b>Copp2</b>         | 240 | 0   | 4.000192 | 251  | 4.183333  | 4.31116  | 42.16888 | Stalled      | chr6:30698410-30848760    | 148.351 |
| <b>Pip5k1l</b>       | 239 | 0   | 3.983524 | 53   | 0.883333  | 0.888088 | 4.063224 | Stalled      | chr2:32429338-32439298    | 7.961   |
| <b>Selp</b>          | 239 | 0   | 3.983524 | 92   | 1.533333  | 0.351064 | 0.427942 | Unclassified | chr1:166051832-166079875  | 26.044  |
| <b>Arid1a</b>        | 239 | 106 | 3.983524 | 2573 | 42.88333  | 24.5466  | 5.200676 | Stalled      | chr4:133234922-133311526  | 74.605  |
| <b>Sipa1l1</b>       | 239 | 0   | 3.983524 | 1284 | 21.4      | 8.2299   | 1.17548  | Stalled      | chr12:83410335-83552769   | 140.435 |
| <b>Rps12</b>         | 238 | 0   | 3.966857 | 151  | 2.516667  | 0        | 3.803278 | Stalled      | chr10:23504989-23509015   | 2.027   |
| <b>Psmb10</b>        | 238 | 0   | 3.966857 | 154  | 2.566667  | 69.7307  | 0.824085 | Elongating   | chr8:108459627-108464292  | 2.666   |
| <b>Ndufa11</b>       | 238 | 0   | 3.966857 | 173  | 2.883333  | 13.7432  | 6.148347 | Stalled      | chr17:5685184-56863670    | 6.487   |
| <b>Pmm2</b>          | 238 | 0   | 3.966857 | 669  | 11.15     | 12.6221  | 8.098677 | Stalled      | chr16:8635799-8657617     | 19.819  |
| <b>N4bp2l1</b>       | 238 | 0   | 3.966857 | 266  | 4.433333  | 7.33405  | 7.373623 | Stalled      | chr5:151374217-151399100  | 22.884  |
| <b>Psd4</b>          | 238 | 0   | 3.966857 | 1110 | 18.5      | 28.2911  | 2.682445 | Elongating   | chr2:24238916-24264249    | 23.334  |
| <b>Sp1</b>           | 238 | 37  | 3.966857 | 439  | 7.316667  | 7.62402  | 14.29362 | Stalled      | chr15:102234746-102266835 | 30.09   |
| <b>Ido2</b>          | 238 | 0   | 3.966857 | 735  | 12.25     | 2.41729  | 0.111615 | Stalled      | chr8:25642363-25688805    | 44.443  |
| <b>Madd</b>          | 238 | 0   | 3.966857 | 422  | 7.033333  | 11.9273  | 11.66611 | Stalled      | chr2:90977516-91025135    | 45.62   |
| <b>Ubp2</b>          | 238 | 0   | 3.966857 | 1459 | 24.31667  | 17.4137  | 17.89589 | Stalled      | chr4:41141347-41224168    | 80.822  |
| <b>Btrc</b>          | 238 | 0   | 3.966857 | 530  | 8.833333  | 1.83078  | 22.92842 | Stalled      | chr19:45436223-45607833   | 169.611 |
| <b>Samd4</b>         | 238 | 0   | 3.966857 | 320  | 5.333333  | 0.789796 | 4.503785 | Unclassified | chr14:47500639-47725492   | 222.854 |
| <b>Mypop</b>         | 237 | 0   | 3.950189 | 269  | 4.483333  | 8.04679  | 2.154038 | Elongating   | chr7:19574593-19587115    | 10.523  |
| <b>Zfp668</b>        | 237 | 0   | 3.950189 | 305  | 5.083333  | 9.68343  | 13.56911 | Stalled      | chr7:135008872-135022337  | 11.466  |
| <b>Adc</b>           | 237 | 0   | 3.950189 | 374  | 6.233333  | 8.14085  | 15.75171 | Stalled      | chr4:128609389-128641661  | 30.273  |
| <b>Ndrg1</b>         | 237 | 0   | 3.950189 | 75   | 1.25      | 1.14416  | 20.98251 | Stalled      | chr15:66760879-66803203   | 40.325  |
| <b>Dnajc11</b>       | 237 | 0   | 3.950189 | 1170 | 19.5      | 18.1787  | 7.296261 | Stalled      | chr4:151305828-151356068  | 48.241  |
| <b>Clp2</b>          | 237 | 0   | 3.950189 | 529  | 8.816667  | 7.40528  | 7.768717 | Stalled      | chr5:134965255-135030304  | 63.05   |
| <b>C330019G07Rik</b> | 237 | 58  | 3.950189 | 681  | 11.35     | 3.243    | 17.44515 | Stalled      | chr5:33131855-33198879    | 65.025  |
| <b>Cytsa</b>         | 237 | 0   | 3.950189 | 878  | 14.63333  | 6.70169  | 31.91251 | Stalled      | chr10:74672817-74775144   | 100.328 |
| <b>Vwf</b>           | 237 | 0   | 3.950189 | 296  | 4.933333  | 0.079948 | 0.309566 | Unclassified | chr6:125500980-125636695  | 133.716 |
| <b>Ier5</b>          | 236 | 0   | 3.933522 | 356  | 5.933333  | 45.939   | 3.479989 | Stalled      | chr1:156943496-156948766  | 3.271   |
| <b>Sic35c1</b>       | 236 | 0   | 3.933522 | 116  | 1.933333  | 12.2618  | 12.10836 | Stalled      | chr2:92292921-92301951    | 7.031   |
| <b>Tmem8</b>         | 236 | 0   | 3.933522 | 75   | 1.25      | 1.75515  | 12.98967 | Stalled      | chr17:26248260-26260196   | 9.937   |
| <b>Cog7</b>          | 236 | 0   | 3.933522 | 325  | 5.416667  | 7.37459  | 9.67148  | Stalled      | chr7:129066352-129127207  | 58.856  |
| <b>0610007P08Rik</b> | 236 | 83  | 3.933522 | 3992 | 66.53333  | 24.5111  | 19.26507 | Stalled      | chr13:63914627-64001609   | 84.983  |
| <b>Nck2</b>          | 236 | 0   | 3.933522 | 1082 | 18.03333  | 4.27019  | 6.672078 | Stalled      | chr1:43500595-43627363    | 124.769 |
| <b>Hist1h1a</b>      | 235 | 54  | 3.916854 | 0    | 0         | 6.84328  | 658      | Unclassified | chr13:23853536-23856283   | 0.748   |
| <b>Men1</b>          | 235 | 0   | 3.916854 | 145  | 2.416667  | 29.715   | 3.59761  | Stalled      | chr19:6333038-6340894     | 5.857   |
| <b>Sic35c2</b>       | 235 | 0   | 3.916854 | 177  | 2.95      | 11.1295  | 7.460381 | Stalled      | chr2:165102055-165115327  | 11.273  |
| <b>Tomm40</b>        | 235 | 0   | 3.916854 | 819  | 13.65     | 61.5138  | 3.862325 | Stalled      | chr7:20286661-20302778    | 14.118  |
| <b>Stgalnac2</b>     | 235 | 0   | 3.916854 | 792  | 13.2      | 0.668239 | 0.419231 | Stalled      | chr11:116538018-116557974 | 17.957  |
| <b>5730437N04Rik</b> | 235 | 0   | 3.916854 | 452  | 7.533333  | 38.7845  | 6.266029 | Stalled      | chr17:5410863-5442260     | 29.398  |
| <b>Rrbp1</b>         | 235 | 0   | 3.916854 | 2775 | 46.25     | 74.2172  | 6.247411 | Stalled      | chr2:143773130-143838999  | 63.87   |
| <b>Ampd2</b>         | 234 | 0   | 3.900187 | 403  | 6.716667  | 15.9948  | 5.161759 | Stalled      | chr3:107876979-107891545  | 12.567  |
| <b>Tchp</b>          | 234 | 0   | 3.900187 | 236  | 3.933333  | 8.03887  | 4.615308 | Stalled      | chr5:115155787-115172336  | 14.55   |
| <b>Dtx2</b>          | 234 | 0   | 3.900187 | 457  | 7.616667  | 8.87341  | 12.80417 | Stalled      | chr5:136468746-136508734  | 37.989  |
| <b>Nup214</b>        | 234 | 0   | 3.900187 | 1467 | 24.45     | 8.15774  | 14.53143 | Stalled      | chr2:31827969-31909495    | 79.527  |
| <b>Zcchc7</b>        | 234 | 0   | 3.900187 | 1330 | 22.16667  | 7.29321  | 55.94573 | Stalled      | chr4:44767439-44945082    | 175.644 |
| <b>Fyn</b>           | 234 | 0   | 3.900187 | 1666 | 27.76667  | 18.6188  | 18.3013  | Stalled      | chr10:39087604-39285180   | 195.577 |
| <b>Dusp2</b>         | 233 | 0   | 3.883519 | 287  | 4.783333  | 43.7249  | 1.938658 | Stalled      | chr2:127159894-127164113  | 2.22    |
| <b>Lad1</b>          | 233 | 0   | 3.883519 | 123  | 2.05      | 39.0722  | 4.925262 | Stalled      | chr1:137713174-137729918  | 14.745  |
| <b>Rnasel</b>        | 233 | 0   | 3.883519 | 159  | 2.65      | 3.5831   | 2.794393 | Elongating   | chr1:155594555-155611350  | 14.796  |
| <b>Adamts12</b>      | 233 | 0   | 3.883519 | 76   | 1.266667  | 0.063252 | 1.354357 | Unclassified | chr2:26932900-26964133    | 29.234  |
| <b>H6pd</b>          | 233 | 0   | 3.883519 | 337  | 5.616667  | 4.36962  | 24.75338 | Stalled      | chr4:149353589-149385132  | 29.544  |
| <b>Pkd1</b>          | 233 | 0   | 3.883519 | 429  | 7.15      | 2.82773  | 25.92436 | Stalled      | chr17:24684894-24733459   | 46.566  |
| <b>Lcp1</b>          | 233 | 0   | 3.883519 | 2639 | 43.98333  | 94.5342  | 0.341753 | Stalled      | chr14:75534231-75630610   | 94.38   |
| <b>Ospb2</b>         | 233 | 0   | 3.883519 | 225  | 3.75      | 0.369043 | 3.728951 | Unclassified | chr11:3603733-3765906     | 160.174 |
| <b>Cdk5rap2</b>      | 233 | 95  | 3.883519 | 928  | 15.46667  | 3.75744  | 13.54513 | Stalled      | chr4:69884057-70073401    | 187.345 |
| <b>mmu-mir-191,r</b> | 232 | 0   | 3.866852 | 351  | 5.85      | ND       | ND       | Elongating   | chr9:108469481-108472090  | 2.61    |

|                      |     |     |          |      |          |          |          |              |                           |         |
|----------------------|-----|-----|----------|------|----------|----------|----------|--------------|---------------------------|---------|
| <b>Stra13</b>        | 232 | 0   | 3.866852 | 118  | 1.966667 | 29.0746  | 2.120473 | Stalled      | chr11:120572254-120577081 | 2.828   |
| <b>Mus81</b>         | 232 | 0   | 3.866852 | 87   | 1.45     | 12.8052  | 15.28862 | Stalled      | chr19:5482839-5490336     | 5.498   |
| <b>Nfe2</b>          | 232 | 0   | 3.866852 | 768  | 12.8     | 0.591427 | 0.040041 | Stalled      | chr15:103078648-103087847 | 7.2     |
| <b>Insig1</b>        | 232 | 74  | 3.866852 | 508  | 8.466667 | 54.6971  | 9.10594  | Stalled      | chr5:28395951-28405202    | 7.252   |
| <b>Tapbp</b>         | 232 | 0   | 3.866852 | 465  | 7.75     | 84.006   | 3.925072 | Stalled      | chr17:34054422-34066235   | 9.814   |
| <b>Ttc34</b>         | 232 | 0   | 3.866852 | 62   | 1.033333 | 0.176113 | 0.138039 | Unclassified | chr4:154228308-154241236  | 10.929  |
| <b>Rnf31</b>         | 232 | 0   | 3.866852 | 393  | 6.55     | 15.8009  | 5.362239 | Stalled      | chr14:56208626-56222508   | 11.883  |
| <b>Rhbdf2</b>        | 232 | 0   | 3.866852 | 647  | 10.78333 | 6.56574  | 0.165108 | Stalled      | chr11:116459478-116490333 | 28.856  |
| <b>Serinc5</b>       | 232 | 0   | 3.866852 | 528  | 8.8      | 6.54165  | 33.70402 | Stalled      | chr13:93379092-93481901   | 100.81  |
| <b>Ddcccag8</b>      | 232 | 0   | 3.866852 | 1082 | 18.03333 | 7.68017  | 16.06285 | Stalled      | chr1:178742942-178950563  | 205.622 |
| <b>Gltpd1</b>        | 231 | 0   | 3.850184 | 56   | 0.933333 | 10.7778  | 21.54715 | Stalled      | chr4:155238831-155245549  | 4.719   |
| <b>Prss42</b>        | 231 | 0   | 3.850184 | 12   | 0.2      | 0.197808 | 0.550812 | Unclassified | chr9:110698688-110706248  | 5.561   |
| <b>Srrm2</b>         | 231 | 0   | 3.850184 | 2456 | 40.93333 | 53.6038  | 3.295512 | Stalled      | chr17:23938153-23961710   | 21.558  |
| <b>Hk2</b>           | 231 | 0   | 3.850184 | 1443 | 24.05    | 12.6249  | 8.410129 | Stalled      | chr6:82675020-82726448    | 49.429  |
| <b>Mrv1</b>          | 231 | 0   | 3.850184 | 255  | 4.25     | 0.113115 | 0.306745 | Unclassified | chr7:118011780-118127609  | 113.83  |
| <b>Cd68</b>          | 230 | 0   | 3.833517 | 69   | 1.15     | 5.86108  | 8.392407 | Unclassified | chr11:69477872-69481564   | 1.693   |
| <b>Wnt1</b>          | 230 | 0   | 3.833517 | 16   | 0.266667 | 0.378382 | 0.470356 | Unclassified | chr15:98618287-98624261   | 3.975   |
| <b>Csf2ra</b>        | 230 | 0   | 3.833517 | 463  | 7.716667 | 0        | 0.349712 | Stalled      | chr19:61300304-61306321   | 4.018   |
| <b>Ii10</b>          | 230 | 146 | 3.833517 | 230  | 3.833333 | 5.54244  | 0.933796 | Elongating   | chr1:132914423-132921547  | 5.125   |
| <b>Bsg</b>           | 230 | 0   | 3.833517 | 243  | 4.05     | 170.495  | 7.880007 | Stalled      | chr10:79165102-79174724   | 7.623   |
| <b>Slc15a3</b>       | 230 | 0   | 3.833517 | 876  | 14.6     | 45.3877  | 2.970048 | Stalled      | chr19:10915033-10932404   | 15.372  |
| <b>Mfng</b>          | 230 | 0   | 3.833517 | 502  | 8.366667 | 19.8994  | 6.292585 | Stalled      | chr15:78586312-78605875   | 17.564  |
| <b>Parvg</b>         | 230 | 0   | 3.833517 | 574  | 9.566667 | 49.9056  | 5.166965 | Stalled      | chr15:84153149-84173408   | 18.26   |
| <b>Pkm2</b>          | 230 | 0   | 3.833517 | 1535 | 25.58333 | 685.202  | 7.327327 | Stalled      | chr9:59502414-59527182    | 22.769  |
| <b>Vps37b</b>        | 230 | 0   | 3.833517 | 1276 | 21.26667 | 15.6461  | 3.188092 | Stalled      | chr5:124454649-124484269  | 27.621  |
| <b>Dscr3</b>         | 230 | 0   | 3.833517 | 283  | 4.716667 | 9.10359  | 32.40335 | Stalled      | chr16:94719330-94750236   | 28.907  |
| <b>A430078G23Rik</b> | 230 | 0   | 3.833517 | 347  | 5.783333 | 6.3594   | 6.654141 | Stalled      | chr8:3351414-3390297      | 36.884  |
| <b>1110059E24Rik</b> | 230 | 0   | 3.833517 | 540  | 9        | 13.0681  | 21.71942 | Stalled      | chr19:21671802-21729281   | 55.48   |
| <b>Usp12</b>         | 230 | 0   | 3.833517 | 409  | 6.816667 | 5.53933  | 13.77116 | Stalled      | chr5:147546387-147608532  | 60.146  |
| <b>Vipr2</b>         | 230 | 0   | 3.833517 | 137  | 2.283333 | 0.340759 | 0.990613 | Unclassified | chr12:117314195-117384734 | 68.54   |
| <b>Lrp8</b>          | 230 | 0   | 3.833517 | 1794 | 29.9     | 3.34617  | 3.624811 | Stalled      | chr4:107472863-107549445  | 74.583  |
| <b>Gpr176</b>        | 230 | 0   | 3.833517 | 115  | 1.916667 | 0.358263 | 5.887827 | Unclassified | chr2:118102845-118201047  | 96.203  |
| <b>Lrba</b>          | 230 | 0   | 3.833517 | 1572 | 26.2     | 4.75315  | 74.8254  | Stalled      | chr3:86026611-86586616    | 558.006 |
| <b>Rpl11</b>         | 229 | 0   | 3.81685  | 417  | 6.95     | 203.649  | 2.214401 | Stalled      | chr4:135605862-135611286  | 3.425   |
| <b>Lgals1</b>        | 229 | 0   | 3.81685  | 106  | 1.766667 | 75.8589  | 1.336429 | Elongating   | chr15:78755154-78760895   | 3.742   |
| <b>Cd2bp2</b>        | 229 | 0   | 3.81685  | 207  | 3.45     | 32.7141  | 6.704909 | Stalled      | chr7:134335173-134341514  | 4.342   |
| <b>Ddit3</b>         | 229 | 0   | 3.81685  | 376  | 6.266667 | 23.7951  | 4.349301 | Stalled      | chr10:126725848-126733344 | 5.497   |
| <b>Coq2</b>          | 229 | 0   | 3.81685  | 464  | 7.733333 | 10.6002  | 7.028251 | Stalled      | chr5:101083744-101105275  | 19.532  |
| <b>290010M23Rik</b>  | 228 | 0   | 3.800182 | 525  | 8.75     | 54.5444  | 4.204115 | Stalled      | chr17:27259609-27272836   | 11.228  |
| <b>Nup85</b>         | 228 | 0   | 3.800182 | 730  | 12.16667 | 26.511   | 6.095221 | Stalled      | chr11:115423757-115445226 | 19.47   |
| <b>Mast1</b>         | 228 | 0   | 3.800182 | 359  | 5.983333 | 2.05924  | 0.383341 | Stalled      | chr8:87435751-87463252    | 25.502  |
| <b>Pkn1</b>          | 228 | 0   | 3.800182 | 590  | 9.833333 | 38.1626  | 10.56815 | Stalled      | chr8:86193994-86225025    | 29.032  |
| <b>Fam149b</b>       | 228 | 65  | 3.800182 | 352  | 5.866667 | 4.0121   | 19.3724  | Stalled      | chr14:21165383-21202713   | 35.331  |
| <b>Slc12a7</b>       | 228 | 0   | 3.800182 | 278  | 4.633333 | 1.92078  | 11.66948 | Stalled      | chr13:73899144-73954190   | 53.047  |
| <b>Fanci</b>         | 228 | 0   | 3.800182 | 539  | 8.983333 | 3.49348  | 18.72355 | Stalled      | chr7:86535223-86595150    | 57.928  |
| <b>Arrb1</b>         | 228 | 0   | 3.800182 | 287  | 4.783333 | 1.4391   | 7.47552  | Stalled      | chr7:106681995-106755281  | 71.287  |
| <b>Mark3</b>         | 228 | 0   | 3.800182 | 878  | 14.63333 | 17.0869  | 17.00732 | Stalled      | chr12:112810720-112894438 | 81.719  |
| <b>Mef2c</b>         | 228 | 237 | 3.800182 | 8807 | 146.7833 | 45.053   | 0.036267 | Stalled      | chr13:83641032-83806684   | 163.653 |
| <b>Ltb</b>           | 227 | 0   | 3.783515 | 170  | 2.833333 | 182.884  | 0.571429 | Elongating   | chr17:35329451-35333250   | 1.8     |
| <b>Adm</b>           | 227 | 0   | 3.783515 | 43   | 0.716667 | 20.6359  | 6.314187 | Stalled      | chr7:117769182-117773333  | 2.152   |
| <b>Eif4a1</b>        | 227 | 0   | 3.783515 | 847  | 14.11667 | 116.565  | 3.279147 | Stalled      | chr11:69480437-69487925   | 5.489   |
| <b>Ogfod2</b>        | 226 | 0   | 3.766847 | 33   | 0.55     | 13.8742  | 8.343199 | Stalled      | chr5:124560346-124565485  | 3.14    |
| <b>Gem</b>           | 226 | 0   | 3.766847 | 399  | 6.65     | 13.4902  | 6.497019 | Stalled      | chr4:11629593-11642140    | 10.548  |
| <b>Nfya</b>          | 226 | 0   | 3.766847 | 810  | 13.5     | 16.8022  | 14.97736 | Stalled      | chr17:48526209-48551145   | 22.937  |
| <b>Ccnf</b>          | 226 | 0   | 3.766847 | 574  | 9.566667 | 19.2074  | 15.32602 | Stalled      | chr17:24360176-24390354   | 28.179  |
| <b>Tmem104</b>       | 226 | 0   | 3.766847 | 403  | 6.716667 | 2.30972  | 23.97205 | Stalled      | chr11:115046800-115108339 | 59.54   |
| <b>Jarid2</b>        | 226 | 0   | 3.766847 | 2941 | 49.01667 | 8.53698  | 8.517274 | Stalled      | chr13:44824271-45016346   | 190.076 |
| <b>Rasl10a</b>       | 225 | 0   | 3.75018  | 10   | 0.166667 | 2.11678  | 1.898286 | Stalled      | chr11:4956130-4960386     | 2.257   |
| <b>Fam113a</b>       | 225 | 0   | 3.75018  | 133  | 2.216667 | 8.98158  | 19.29742 | Stalled      | chr2:130243419-130252377  | 6.959   |
| <b>Trmt1</b>         | 225 | 0   | 3.75018  | 345  | 5.75     | 26.7019  | 2.346497 | Elongating   | chr8:87211145-87223707    | 10.563  |
| <b>Vps16</b>         | 225 | 0   | 3.75018  | 441  | 7.35     | 20.5102  | 23.19685 | Stalled      | chr2:130248055-130270005  | 19.951  |
| <b>Dym</b>           | 225 | 0   | 3.75018  | 1955 | 32.58333 | 7.54059  | 14.42875 | Stalled      | chr18:75176425-75446620   | 268.196 |
| <b>Tcf4</b>          | 225 | 226 | 3.75018  | 3686 | 61.43333 | 9.98762  | 14.96247 | Stalled      | chr18:69502145-69847621   | 343.477 |
| <b>Ly6d</b>          | 224 | 0   | 3.733512 | 43   | 0.716667 | 334.446  | 1.367591 | Unclassified | chr15:74592485-74595997   | 1.513   |
| <b>Cd93</b>          | 224 | 0   | 3.733512 | 93   | 1.55     | 5.55767  | 3.511862 | Stalled      | chr2:148262386-148271271  | 6.886   |
| <b>Cdcd84</b>        | 224 | 0   | 3.733512 | 659  | 10.98333 | 9.7803   | 1.418664 | Elongating   | chr9:44218246-44228090    | 7.845   |
| <b>Zfyve27</b>       | 224 | 0   | 3.733512 | 380  | 6.333333 | 4.9147   | 10.91192 | Stalled      | chr19:42243056-42269800   | 24.025  |
| <b>Cdcd12</b>        | 224 | 0   | 3.733512 | 1006 | 16.76667 | 39.4404  | 11.73572 | Stalled      | chr9:110557006-110614096  | 55.091  |
| <b>Mpdu1</b>         | 223 | 0   | 3.716845 | 188  | 3.133333 | 28.9432  | 11.70094 | Stalled      | chr11:69470205-69478144   | 5.94    |
| <b>Ctsa</b>          | 223 | 0   | 3.716845 | 293  | 4.883333 | 25.6092  | 3.173007 | Stalled      | chr2:164656372-164666532  | 8.161   |
| <b>Pbxip1</b>        | 223 | 0   | 3.716845 | 152  | 2.533333 | 14.2244  | 6.815431 | Stalled      | chr3:89238625-89254874    | 14.25   |
| <b>Ii10rb</b>        | 223 | 0   | 3.716845 | 285  | 4.75     | 4.94812  | 18.99209 | Stalled      | chr16:91404479-91426078   | 19.6    |
| <b>1500010J02Rik</b> | 223 | 0   | 3.716845 | 285  | 4.75     | 7.1941   | 22.09616 | Stalled      | chr11:68827412-68849974   | 20.563  |
| <b>Rexo1</b>         | 223 | 0   | 3.716845 | 907  | 15.11667 | 16.9125  | 3.475263 | Stalled      | chr10:80003670-80026305   | 20.636  |
| <b>Pigr</b>          | 223 | 0   | 3.716845 | 182  | 3.033333 | 0.207146 | 0        | Stalled      | chr1:132721260-132748824  | 25.565  |
| <b>Lrrc8a</b>        | 223 | 0   | 3.716845 | 343  | 5.716667 | 1.8557   | 18.5621  | Stalled      | chr2:30091288-30119310    | 26.023  |
| <b>Dtl</b>           | 223 | 0   | 3.716845 | 897  | 14.95    | 8.80254  | 22.32239 | Stalled      | chr1:193361243-193401413  | 38.171  |
| <b>Celsr1</b>        | 223 | 0   | 3.716845 | 534  | 8.9      | 0.870853 | 5.61747  | Stalled      | chr15:85729187-85866207   | 135.021 |
| <b>Pex14</b>         | 223 | 0   | 3.716845 | 1508 | 25.13333 | 13.7848  | 10.33137 | Stalled      | chr4:148334643-148475921  | 139.279 |
| <b>Btbnd9</b>        | 223 | 0   | 3.716845 | 2100 | 35       | 3.1545   | 26.6193  | Stalled      | chr17:30352468-30715232   | 360.765 |
| <b>Cacna1c</b>       | 223 | 0   | 3.716845 | 1079 | 17.98333 | 0.493247 | 7.170905 | Stalled      | chr6:118542314-119148427  | 604.114 |
| <b>AI467606</b>      | 222 | 0   | 3.700177 | 60   | 1        | 16.4358  | 8.702102 | Stalled      | chr7:134232949-134237563  | 2.615   |
| <b>Hexim1</b>        | 222 | 0   | 3.700177 | 114  | 1.9      | 25.6593  | 8.312669 | Stalled      | chr11:102975638-102981038 | 3.401   |
| <b>Siva1</b>         | 222 | 0   | 3.700177 | 65   | 1.083333 | 32.2994  | 10.17378 | Stalled      | chr12:113881038-113887363 | 4.326   |
| <b>Cnpy3</b>         | 222 | 0   | 3.700177 | 1175 | 19.58333 | 59.7587  | 6.393099 | Stalled      | chr17:46872661-46891161   | 16.501  |
| <b>Pdia4</b>         | 222 | 0   | 3.700177 | 814  | 13.56667 | 151.785  | 10.01656 | Stalled      | chr6:47746139-47765511    | 17.373  |

|                      |     |    |          |      |          |          |          |              |                           |          |
|----------------------|-----|----|----------|------|----------|----------|----------|--------------|---------------------------|----------|
| <b>Dclre1a</b>       | 222 | 0  | 3.700177 | 88   | 1.466667 | 0.720285 | 18.05821 | Stalled      | chr19:56603650-56624516   | 18.867   |
| <b>Wipi2</b>         | 222 | 0  | 3.700177 | 385  | 6.416667 | 7.41129  | 27.73265 | Stalled      | chr5:143103537-143145324  | 39.788   |
| <b>Acsf3</b>         | 222 | 0  | 3.700177 | 539  | 8.983333 | 7.30423  | 3.849925 | Stalled      | chr8:125297404-125341781  | 42.378   |
| <b>Ints7</b>         | 222 | 0  | 3.700177 | 1114 | 18.56667 | 18.7286  | 19.66783 | Stalled      | chr1:193397612-193445570  | 45.959   |
| <b>Osbpl5</b>        | 222 | 0  | 3.700177 | 599  | 9.983333 | 5.61324  | 0.480984 | Stalled      | chr7:150874666-150929868  | 53.203   |
| <b>Ttll5</b>         | 222 | 0  | 3.700177 | 1079 | 17.98333 | 3.26773  | 52.02083 | Stalled      | chr12:87163659-87394850   | 229.192  |
| <b>Pold4</b>         | 221 | 0  | 3.68351  | 67   | 1.116667 | 86.1702  | 3.411834 | Unclassified | chr19:4229898-4233633     | 1.736    |
| <b>Gpr108</b>        | 221 | 0  | 3.68351  | 70   | 1.166667 | 16.5109  | 19.94655 | Stalled      | chr17:57374337-57389064   | 12.728   |
| <b>Ehbp111</b>       | 221 | 0  | 3.68351  | 673  | 11.21667 | 33.1747  | 3.687978 | Stalled      | chr19:5707373-5728317     | 18.945   |
| <b>Wdr63</b>         | 221 | 0  | 3.68351  | 260  | 4.333333 | 0.444867 | 1.629617 | Unclassified | chr3:145703490-145773000  | 67.511   |
| <b>Plekhn3</b>       | 221 | 0  | 3.68351  | 1600 | 26.66667 | 3.54412  | 13.02158 | Stalled      | chr1:64835694-65005398    | 167.705  |
| <b>Megf11</b>        | 221 | 0  | 3.68351  | 590  | 9.833333 | 0.118841 | 1.390391 | Unclassified | chr9:64231432-64548781    | 315.35   |
| <b>Nav2</b>          | 221 | 0  | 3.68351  | 1143 | 19.05    | 0.427978 | 0.362527 | Unclassified | chr7:56212442-56865458    | 651.017  |
| <b>H2afx</b>         | 220 | 0  | 3.666842 | 184  | 3.066667 | 55.3676  | 1.402039 | Unclassified | chr9:44140797-44144156    | 1.36     |
| <b>Snx22</b>         | 220 | 0  | 3.666842 | 235  | 3.916667 | 2.94079  | 0.149105 | Stalled      | chr9:65912982-65919538    | 4.557    |
| <b>Eif2b4</b>        | 220 | 66 | 3.666842 | 85   | 1.416667 | 25.5471  | 19.69632 | Stalled      | chr5:31489930-31497512    | 5.583    |
| <b>Cuedc2</b>        | 220 | 0  | 3.666842 | 143  | 2.383333 | 24.5287  | 5.568114 | Stalled      | chr19:46404301-46415150   | 8.85     |
| <b>Rhcg</b>          | 220 | 0  | 3.666842 | 495  | 8.25     | 56.3129  | 7.36417  | Stalled      | chr7:109387636-109400632  | 10.997   |
| <b>Gga3</b>          | 220 | 0  | 3.666842 | 870  | 14.5     | 9.84966  | 10.0543  | Stalled      | chr11:115445568-115467220 | 19.653   |
| <b>Golga2</b>        | 220 | 0  | 3.666842 | 167  | 2.783333 | 12.9212  | 26.74756 | Stalled      | chr2:32141772-32163441    | 19.67    |
| <b>Aldh18a1</b>      | 220 | 0  | 3.666842 | 616  | 10.26667 | 21.2177  | 6.607418 | Stalled      | chr19:40624747-40664953   | 38.207   |
| <b>Stt3b</b>         | 220 | 0  | 3.666842 | 2545 | 42.41667 | 28.7964  | 17.78611 | Stalled      | chr9:115151699-115221539  | 67.841   |
| <b>Tpd52</b>         | 220 | 0  | 3.666842 | 518  | 8.633333 | 10.2688  | 14.13853 | Stalled      | chr3:8929435-9006515      | 75.081   |
| <b>Map3k4</b>        | 220 | 0  | 3.666842 | 360  | 6        | 4.47937  | 26.40962 | Stalled      | chr17:12420486-12513526   | 91.041   |
| <b>Calr</b>          | 219 | 0  | 3.650175 | 508  | 8.466667 | 600.338  | 4.304399 | Stalled      | chr8:87365986-87372830    | 4.845    |
| <b>Rrm2</b>          | 219 | 0  | 3.650175 | 532  | 8.866667 | 40.6922  | 5.358766 | Stalled      | chr12:25391118-25399010   | 5.893    |
| <b>2400001E08Rik</b> | 219 | 0  | 3.650175 | 158  | 2.633333 | 34.3184  | 10.62497 | Stalled      | chr7:109052350-109060415  | 6.066    |
| <b>Nek8</b>          | 219 | 0  | 3.650175 | 139  | 2.316667 | 3.91737  | 9.847646 | Stalled      | chr11:77979607-77992168   | 10.562   |
| <b>Klhdc2</b>        | 219 | 0  | 3.650175 | 1233 | 20.55    | 103.07   | 4.896238 | Stalled      | chr12:70395667-70411674   | 14.008   |
| <b>Kri1</b>          | 219 | 0  | 3.650175 | 1005 | 16.75    | 19.4744  | 0        | Stalled      | chr9:21077900-21094413    | 14.514   |
| <b>Nsl1</b>          | 219 | 0  | 3.650175 | 517  | 8.616667 | 9.16996  | 10.96505 | Stalled      | chr1:192884899-192908435  | 21.537   |
| <b>Aloxe3</b>        | 219 | 0  | 3.650175 | 53   | 0.883333 | 0.722262 | 1.745193 | Unclassified | chr11:68937878-68962616   | 22.739   |
| <b>Vcpip1</b>        | 219 | 0  | 3.650175 | 146  | 2.433333 | 16.0832  | 39.93576 | Stalled      | chr1:9713277-9740463      | 25.187   |
| <b>Adnp</b>          | 219 | 0  | 3.650175 | 915  | 15.25    | 11.7196  | 7.875984 | Stalled      | chr2:168006464-168034562  | 26.099   |
| <b>Adamts14</b>      | 219 | 0  | 3.650175 | 294  | 4.9      | 0.717807 | 0.407919 | Unclassified | chr10:60659859-60738186   | 76.328   |
| <b>Smpd3</b>         | 219 | 0  | 3.650175 | 324  | 5.4      | 0.184228 | 10.75057 | Stalled      | chr8:108776447-108863888  | 85.442   |
| <b>Nrp2</b>          | 219 | 0  | 3.650175 | 782  | 13.03333 | 4.19381  | 10.20794 | Stalled      | chr1:62747890-62865266    | 115.377  |
| <b>Uqcr</b>          | 218 | 0  | 3.633507 | 59   | 0.983333 | 68.4196  | 9.37033  | Stalled      | chr10:79865741-79871566   | 3.826    |
| <b>4930427A07Rik</b> | 218 | 0  | 3.633507 | 82   | 1.366667 | 6.97799  | 12.05328 | Stalled      | chr12:114392631-114403669 | 9.039    |
| <b>Psd</b>           | 218 | 0  | 3.633507 | 567  | 9.45     | 7.33899  | 0.217941 | Stalled      | chr19:46386576-46403646   | 15.071   |
| <b>Klhdc4</b>        | 218 | 0  | 3.633507 | 623  | 10.38333 | 23.8191  | 10.48742 | Stalled      | chr8:124320207-124354569  | 33.263   |
| <b>Steap3</b>        | 218 | 0  | 3.633507 | 180  | 3        | 1.36933  | 0.976179 | Unclassified | chr1:122122992-122169659  | 44.668   |
| <b>Pisd</b>          | 218 | 0  | 3.633507 | 611  | 10.18333 | 15.4503  | 22.20402 | Stalled      | chr5:33078961-33130275    | 49.315   |
| <b>Plxdc1</b>        | 218 | 0  | 3.633507 | 451  | 7.516667 | 1.35083  | 3.757794 | Stalled      | chr11:97784550-97849760   | 63.211   |
| <b>Usp48</b>         | 218 | 0  | 3.633507 | 678  | 11.3     | 10.5328  | 42.64066 | Stalled      | chr4:137148103-137214452  | 64.35    |
| <b>Gnb1l</b>         | 218 | 0  | 3.633507 | 278  | 4.633333 | 1.64526  | 67.89988 | Stalled      | chr16:18496860-18566772   | 67.913   |
| <b>Fam69a</b>        | 218 | 0  | 3.633507 | 1202 | 20.03333 | 6.08234  | 8.961803 | Stalled      | chr5:108337060-108418096  | 79.037   |
| <b>Atp5d</b>         | 217 | 0  | 3.61684  | 137  | 2.283333 | 162.702  | 3.124404 | Stalled      | chr10:79603059-79608563   | 3.505    |
| <b>Abhd15</b>        | 217 | 0  | 3.61684  | 44   | 0.733333 | 1.86551  | 4.186198 | Stalled      | chr11:77326618-77334130   | 5.513    |
| <b>Ifi271l</b>       | 217 | 0  | 3.61684  | 402  | 6.7      | 95.8286  | 1.205298 | Elongating   | chr12:104670398-104678455 | 6.058    |
| <b>Ddx41</b>         | 217 | 0  | 3.61684  | 184  | 3.066667 | 31.5272  | 4.299868 | Stalled      | chr13:55631770-55640019   | 6.25     |
| <b>Lgals3bp</b>      | 217 | 0  | 3.61684  | 270  | 4.5      | 26.8353  | 4.234883 | Stalled      | chr11:118254065-118265245 | 9.181    |
| <b>Sico4a1</b>       | 217 | 0  | 3.61684  | 718  | 11.96667 | 9.90333  | 0.651837 | Stalled      | chr2:180193682-180209557  | 13.876   |
| <b>Sic34a1</b>       | 217 | 0  | 3.61684  | 50   | 0.833333 | 0.106192 | 0.219348 | Unclassified | chr13:55499008-55516056   | 15.049   |
| <b>Polr3gl</b>       | 217 | 40 | 3.61684  | 96   | 1.6      | 9.05787  | 20.74103 | Stalled      | chr3:96381796-96400081    | 16.286   |
| <b>Dhx37</b>         | 217 | 0  | 3.61684  | 474  | 7.9      | 7.85747  | 6.547821 | Stalled      | chr5:125894773-125916418  | 19.646   |
| <b>Fam167a</b>       | 217 | 0  | 3.61684  | 371  | 6.183333 | 3.1618   | 3.732881 | Stalled      | chr14:64053230-64084339   | 29.11    |
| <b>Spns2</b>         | 217 | 0  | 3.61684  | 632  | 10.53333 | 0.61469  | 1.002325 | Elongating   | chr11:72265139-72305406   | 38.268   |
| <b>2900026A02Rik</b> | 217 | 0  | 3.61684  | 235  | 3.916667 | 0.551155 | 0.488697 | Unclassified | chr5:113515344-113594333  | 76.99    |
| <b>Pop7</b>          | 216 | 0  | 3.600173 | 0    | 0        | 32.342   | 380      | Unclassified | chr5:137942666-137945657  | 0.992    |
| <b>Cstf2t</b>        | 216 | 0  | 3.600173 | 83   | 1.383333 | 12.9569  | 4.68716  | Stalled      | chr19:31155330-31161082   | 3.753    |
| <b>Spag7</b>         | 216 | 0  | 3.600173 | 194  | 3.233333 | 41.8727  | 9.876103 | Stalled      | chr11:70477270-70484918   | 5.649    |
| <b>Nr1d1</b>         | 216 | 0  | 3.600173 | 81   | 1.35     | 1.04878  | 1.517472 | Elongating   | chr11:98629248-98638556   | 7.309    |
| <b>Cplx2</b>         | 216 | 0  | 3.600173 | 86   | 1.433333 | 0.64537  | 0.592772 | Stalled      | chr13:54470712-54485278   | 12.567   |
| <b>Mss4a1</b>        | 216 | 0  | 3.600173 | 437  | 7.283333 | 104.054  | 4.930019 | Stalled      | chr19:11325092-11342641   | 15.55    |
| <b>Arpc2</b>         | 216 | 0  | 3.600173 | 1630 | 27.16667 | 197.359  | 7.146146 | Stalled      | chr1:74281123-74314787    | 31.665   |
| <b>Phf21b</b>        | 216 | 0  | 3.600173 | 153  | 2.55     | 0.90963  | 11.27328 | Stalled      | chr15:84615805-84688559   | 70.755   |
| <b>Stk10</b>         | 216 | 0  | 3.600173 | 1717 | 28.61667 | 20.1231  | 12.59504 | Stalled      | chr11:32431265-32524595   | 91.331   |
| <b>Ergic1</b>        | 216 | 0  | 3.600173 | 1236 | 20.6     | 19.92    | 12.91693 | Stalled      | chr17:26696456-26793878   | 95.423   |
| <b>Prkg1</b>         | 216 | 0  | 3.600173 | 1007 | 16.78333 | 0.275158 | 2.714982 | Unclassified | chr19:30642040-31841523   | 1197.484 |
| <b>Ogg1</b>          | 215 | 0  | 3.583505 | 88   | 1.466667 | 14.1069  | 27.42954 | Stalled      | chr6:113274969-113284180  | 7.212    |
| <b>Mpnd</b>          | 215 | 0  | 3.583505 | 316  | 5.266667 | 35.0512  | 4.143268 | Stalled      | chr17:56146623-56156206   | 7.584    |
| <b>Telo2</b>         | 215 | 0  | 3.583505 | 317  | 5.283333 | 9.21101  | 10.75337 | Stalled      | chr17:25236513-25254850   | 16.338   |
| <b>Fuk</b>           | 215 | 0  | 3.583505 | 218  | 3.633333 | 3.3319   | 2.725474 | Elongating   | chr8:113406362-113428359  | 19.998   |
| <b>Sfrs16</b>        | 215 | 0  | 3.583505 | 743  | 12.38333 | 18.6563  | 8.995096 | Stalled      | chr7:20166391-20191817    | 23.427   |
| <b>Ell</b>           | 215 | 0  | 3.583505 | 824  | 13.73333 | 9.85297  | 11.1376  | Stalled      | chr8:73061573-73116757    | 53.185   |
| <b>Prdm15</b>        | 215 | 81 | 3.583505 | 423  | 7.05     | 2.66754  | 20.8574  | Stalled      | chr16:98013073-98074834   | 59.762   |
| <b>Dtnb</b>          | 215 | 85 | 3.583505 | 1072 | 17.86667 | 6.79726  | 8.752305 | Stalled      | chr12:3571040-3781397     | 208.358  |
| <b>Mars2</b>         | 214 | 0  | 3.566838 | 29   | 0.483333 | 16.1747  | 18.16967 | Stalled      | chr1:55292020-55296902    | 2.883    |
| <b>Rps18</b>         | 214 | 0  | 3.566838 | 501  | 8.35     | 258.558  | 2.598621 | Stalled      | chr17:34088943-34094586   | 3.644    |
| <b>Sharpin</b>       | 214 | 0  | 3.566838 | 204  | 3.4      | 28.9994  | 4.07974  | Stalled      | chr15:76177469-76183540   | 4.072    |
| <b>Nckipso</b>       | 214 | 0  | 3.566838 | 142  | 2.366667 | 6.1303   | 9.167298 | Stalled      | chr9:108708710-108720697  | 9.988    |
| <b>Fbxl2</b>         | 214 | 0  | 3.566838 | 226  | 3.766667 | 0.348757 | 2.130825 | Unclassified | chr9:113886075-113937869  | 49.795   |
| <b>H2afy</b>         | 214 | 0  | 3.566838 | 1546 | 25.76667 | 85.6974  | 10.50285 | Stalled      | chr13:56174983-56238911   | 61.929   |
| <b>Wdr25</b>         | 214 | 0  | 3.566838 | 619  | 10.31667 | 1.40572  | 43.20232 | Stalled      | chr12:110130481-110266660 | 134.18   |
| <b>Dennd1a</b>       | 214 | 0  | 3.566838 | 1717 | 28.61667 | 3.83661  | 21.88908 | Stalled      | chr2:37654509-38144904    | 488.396  |



|                      |     |    |          |      |          |          |          |              |                           |         |
|----------------------|-----|----|----------|------|----------|----------|----------|--------------|---------------------------|---------|
| <b>Klf2</b>          | 213 | 0  | 3.55017  | 549  | 9.15     | 50.777   | 1.829675 | Elongating   | chr8:74840960-74845553    | 2.594   |
| <b>Tm7sf2</b>        | 213 | 0  | 3.55017  | 123  | 2.05     | 26.2564  | 4.379073 | Stalled      | chr19:6062820-6069850     | 5.031   |
| <b>Snx17</b>         | 213 | 67 | 3.55017  | 397  | 6.616667 | 36.4481  | 4.247676 | Stalled      | chr5:31493676-31501273    | 5.598   |
| <b>Nfkb2</b>         | 213 | 0  | 3.55017  | 427  | 7.116667 | 68.5273  | 4.873102 | Stalled      | chr19:46378107-46386580   | 6.474   |
| <b>Denn4b</b>        | 213 | 0  | 3.55017  | 657  | 10.95    | 27.1756  | 7.545077 | Stalled      | chr3:90068455-90084587    | 14.133  |
| <b>Pdk2</b>          | 213 | 0  | 3.55017  | 23   | 0.383333 | 2.10725  | 5.324029 | Unclassified | chr11:94887572-94904685   | 15.114  |
| <b>Sorbs3</b>        | 213 | 0  | 3.55017  | 79   | 1.316667 | 0.338661 | 3.234951 | Unclassified | chr14:70580274-70609444   | 27.171  |
| <b>Palm</b>          | 213 | 0  | 3.55017  | 221  | 3.683333 | 12.3689  | 3.193275 | Stalled      | chr10:79254316-79283641   | 27.326  |
| <b>Dnajc16</b>       | 213 | 0  | 3.55017  | 463  | 7.166667 | 5.19402  | 13.07319 | Stalled      | chr4:141317912-141348559  | 28.648  |
| <b>Atp6v0a2</b>      | 213 | 0  | 3.55017  | 329  | 5.483333 | 13.1831  | 41.8967  | Stalled      | chr5:125077647-125202517  | 122.871 |
| <b>Adk</b>           | 213 | 0  | 3.55017  | 1284 | 21.4     | 6.98029  | 75.74096 | Stalled      | chr14:21869854-22267768   | 395.915 |
| <b>Rab3a</b>         | 212 | 0  | 3.533503 | 83   | 1.383333 | 3.75238  | 2.443432 | Stalled      | chr8:73276583-73282584    | 4.002   |
| <b>Sigirr</b>        | 212 | 0  | 3.533503 | 216  | 3.6      | 7.85653  | 1.231472 | Elongating   | chr7:148277073-148288445  | 9.373   |
| <b>Ptpn18</b>        | 212 | 0  | 3.533503 | 480  | 8        | 39.2155  | 1.454106 | Elongating   | chr1:34514590-34530624    | 14.035  |
| <b>Bat2l</b>         | 212 | 0  | 3.533503 | 2412 | 40.2     | 16.5688  | 5.053608 | Stalled      | chr2:32004667-32090056    | 83.39   |
| <b>Zc3h3</b>         | 212 | 0  | 3.533503 | 830  | 13.83333 | 2.86555  | 15.66114 | Stalled      | chr15:75584876-75674338   | 87.463  |
| <b>Wnk1</b>          | 212 | 0  | 3.533503 | 1762 | 29.36667 | 36.1135  | 21.39546 | Stalled      | chr6:119873988-119990673  | 114.686 |
| <b>Lrrc8d</b>        | 212 | 0  | 3.533503 | 1572 | 26.2     | 4.39451  | 12.12775 | Stalled      | chr5:106126987-106244234  | 115.248 |
| <b>Ppp1r14b</b>      | 211 | 0  | 3.516835 | 193  | 3.216667 | 66.04    | 1.052512 | Elongating   | chr19:7047537-7051814     | 2.278   |
| <b>Chmp2a</b>        | 211 | 0  | 3.516835 | 187  | 3.116667 | 54.8789  | 5.841969 | Stalled      | chr7:13617354-13622126    | 2.773   |
| <b>Maf1</b>          | 211 | 0  | 3.516835 | 40   | 0.666667 | 32.1954  | 12.19303 | Stalled      | chr15:76179723-76184808   | 3.086   |
| <b>Ifrd1</b>         | 211 | 0  | 3.516835 | 201  | 3.35     | 28.4522  | 6.251809 | Stalled      | chr9:107488048-107495369  | 5.322   |
| <b>Pdlim2</b>        | 211 | 0  | 3.516835 | 292  | 4.866667 | 15.786   | 0.204562 | Stalled      | chr14:70564024-70579479   | 13.456  |
| <b>Pttg1ip</b>       | 211 | 0  | 3.516835 | 152  | 2.533333 | 9.23358  | 28.89834 | Stalled      | chr10:77042511-77061477   | 16.967  |
| <b>Adam18</b>        | 211 | 0  | 3.516835 | 129  | 2.15     | 0.043144 | 0.713281 | Unclassified | chr8:25712718-25787227    | 72.51   |
| <b>Refp2</b>         | 210 | 93 | 3.500168 | 1    | 0.016667 | 22.3139  | 79.57614 | Unclassified | chr1:173431608-173434881  | 1.274   |
| <b>Tmem55b</b>       | 210 | 0  | 3.500168 | 423  | 7.05     | 22.6447  | 3.295676 | Stalled      | chr14:51545744-51552524   | 4.781   |
| <b>Gimap7</b>        | 210 | 38 | 3.500168 | 110  | 1.833333 | 37.5748  | 4.972639 | Stalled      | chr6:48666619-48674635    | 6.017   |
| <b>Crel2d</b>        | 210 | 0  | 3.500168 | 153  | 2.55     | 96.166   | 12.86835 | Stalled      | chr15:88648075-88657111   | 7.037   |
| <b>Polr2f</b>        | 210 | 0  | 3.500168 | 268  | 4.466667 | 95.9821  | 6.202428 | Stalled      | chr15:78969796-78982197   | 10.402  |
| <b>Ncl</b>           | 210 | 0  | 3.500168 | 1886 | 31.43333 | 115.032  | 6.421593 | Stalled      | chr1:88241293-88258030    | 14.738  |
| <b>Katnal1</b>       | 210 | 0  | 3.500168 | 187  | 3.116667 | 2.49705  | 19.44875 | Stalled      | chr5:149687650-149742199  | 52.55   |
| <b>Vac11</b>         | 210 | 0  | 3.500168 | 1650 | 27.5     | 17.1569  | 10.93522 | Stalled      | chr8:113140537-113244299  | 101.763 |
| <b>Ctnnb1</b>        | 210 | 0  | 3.500168 | 1299 | 21.65    | 22.0552  | 13.42166 | Stalled      | chr2:157561136-157717639  | 154.504 |
| <b>Srgap2</b>        | 210 | 65 | 3.500168 | 1479 | 24.65    | 5.33942  | 54.80736 | Stalled      | chr1:133181827-133425938  | 242.112 |
| <b>Mxd3</b>          | 209 | 0  | 3.4835   | 286  | 4.766667 | 11.1607  | 3.113964 | Stalled      | chr13:55426528-55433091   | 4.564   |
| <b>B9d2</b>          | 209 | 0  | 3.4835   | 238  | 3.966667 | 18.8999  | 3.196145 | Stalled      | chr7:26464176-26471577    | 5.402   |
| <b>Scarf2</b>        | 209 | 0  | 3.4835   | 58   | 0.966667 | 1.43978  | 0.88288  | Unclassified | chr16:17795374-17808380   | 11.007  |
| <b>Stat6</b>         | 209 | 0  | 3.4835   | 343  | 5.716667 | 23.8955  | 13.98013 | Stalled      | chr10:127078041-127098043 | 18.003  |
| <b>Aars</b>          | 209 | 0  | 3.4835   | 1043 | 17.38333 | 71.4728  | 4.278541 | Stalled      | chr8:113555866-113580770  | 22.905  |
| <b>Fam163b</b>       | 209 | 0  | 3.4835   | 106  | 1.766667 | 0.174901 | 0.870225 | Unclassified | chr2:26967522-26999994    | 30.473  |
| <b>Efcab4b</b>       | 209 | 0  | 3.4835   | 203  | 3.383333 | 0.890348 | 1.404741 | Unclassified | chr6:127525992-127579956  | 51.965  |
| <b>Gpatch2</b>       | 209 | 0  | 3.4835   | 2083 | 34.71667 | 7.50913  | 8.394667 | Stalled      | chr1:189037389-189175306  | 135.918 |
| <b>Hspa2</b>         | 208 | 0  | 3.466833 | 17   | 0.283333 | 7.98853  | 20.68936 | Stalled      | chr12:77503356-77507923   | 2.568   |
| <b>Emp3</b>          | 208 | 0  | 3.466833 | 82   | 1.366667 | 70.6451  | 2.621409 | Stalled      | chr7:53173392-53178796    | 3.405   |
| <b>Irgq</b>          | 208 | 0  | 3.466833 | 109  | 1.816667 | 6.8929   | 7.495494 | Stalled      | chr7:25313666-25323618    | 7.953   |
| <b>Rilp2</b>         | 208 | 0  | 3.466833 | 906  | 15.1     | 157.476  | 4.920724 | Stalled      | chr5:124913273-124930244  | 14.972  |
| <b>Dusp13</b>        | 208 | 0  | 3.466833 | 23   | 0.383333 | 0.044093 | 1.528742 | Unclassified | chr14:22552617-22569844   | 15.228  |
| <b>Gna13</b>         | 208 | 0  | 3.466833 | 1035 | 17.25    | 13.029   | 13.38311 | Stalled      | chr11:109222107-109262683 | 38.577  |
| <b>Bfsp2</b>         | 208 | 0  | 3.466833 | 1051 | 17.51667 | 11.0349  | 0.295309 | Stalled      | chr9:103327253-103384658  | 55.406  |
| <b>Reck</b>          | 208 | 0  | 3.466833 | 142  | 2.366667 | 0.477034 | 4.545849 | Unclassified | chr4:43886401-43957678    | 69.278  |
| <b>Itgb5</b>         | 208 | 0  | 3.466833 | 448  | 7.466667 | 3.25035  | 5.026094 | Stalled      | chr16:33827750-33949422   | 119.673 |
| <b>Grand1b</b>       | 208 | 0  | 3.466833 | 1521 | 25.35    | 8.17024  | 11.96641 | Stalled      | chr9:40105491-40265349    | 157.859 |
| <b>Amigo3</b>        | 207 | 0  | 3.450165 | 204  | 3.4      | 3.58725  | 1.705173 | Elongating   | chr9:107953489-107958032  | 2.544   |
| <b>Chpf2</b>         | 207 | 0  | 3.450165 | 339  | 5.65     | 21.5228  | 3.694046 | Stalled      | chr5:24090567-24098304    | 5.738   |
| <b>Rdm1</b>          | 207 | 49 | 3.450165 | 45   | 0.75     | 13.0942  | 131.5029 | Stalled      | chr11:101487262-101497395 | 8.134   |
| <b>Rsad1</b>         | 207 | 0  | 3.450165 | 86   | 1.433333 | 2.53752  | 12.91793 | Stalled      | chr11:94401111-94412521   | 9.411   |
| <b>Xaf1</b>          | 207 | 0  | 3.450165 | 228  | 3.8      | 1.94906  | 4.412562 | Stalled      | chr11:72113130-72127235   | 12.106  |
| <b>Cstad</b>         | 207 | 0  | 3.450165 | 126  | 2.1      | 0.250993 | 8.267402 | Stalled      | chr2:30448563-30464465    | 13.903  |
| <b>Rab20</b>         | 207 | 0  | 3.450165 | 805  | 13.41667 | 4.88058  | 4.145328 | Stalled      | chr8:11453976-11480499    | 24.524  |
| <b>Igf2r</b>         | 207 | 0  | 3.450165 | 927  | 15.45    | 8.37891  | 7.239372 | Stalled      | chr17:12875271-12964572   | 87.302  |
| <b>Aak1</b>          | 207 | 0  | 3.450165 | 802  | 13.36667 | 2.184    | 16.47548 | Stalled      | chr6:86797510-86953221    | 153.712 |
| <b>Ank1</b>          | 207 | 36 | 3.450165 | 282  | 4.7      | 0.187762 | 0.764826 | Unclassified | chr8:24083353-24260968    | 175.616 |
| <b>Gas5</b>          | 206 | 10 | 3.44     | 1404 | 264.8671 | 61.8327  | 2.772061 | Elongating   | chr1:162963297-162968668  | 3.371   |
| <b>Osm</b>           | 206 | 0  | 3.433498 | 131  | 2.183333 | 1.69537  | 4.780343 | Stalled      | chr11:4134787-4141027     | 4.241   |
| <b>Mst1</b>          | 206 | 0  | 3.433498 | 171  | 2.85     | 0.594283 | 0.144055 | Stalled      | chr9:107980766-107987358  | 4.593   |
| <b>Tekt4</b>         | 206 | 0  | 3.433498 | 17   | 0.283333 | 0.794281 | 0.190707 | Unclassified | chr17:25606534-25613539   | 5.006   |
| <b>Cdc34</b>         | 206 | 0  | 3.433498 | 331  | 5.516667 | 77.3742  | 3.978778 | Stalled      | chr10:79142939-79151143   | 6.205   |
| <b>Sh2b1</b>         | 206 | 0  | 3.433498 | 212  | 3.533333 | 30.9197  | 8.599294 | Stalled      | chr7:133610507-133620644  | 8.138   |
| <b>Cpsf3</b>         | 206 | 0  | 3.433498 | 501  | 8.35     | 21.7656  | 11.39293 | Stalled      | chr12:21290157-21320917   | 28.761  |
| <b>Gm628</b>         | 206 | 0  | 3.433498 | 79   | 1.316667 | 0.051448 | 0.791467 | Unclassified | chr15:73617365-73672101   | 52.737  |
| <b>Denn23</b>        | 206 | 0  | 3.433498 | 550  | 9.166667 | 6.78339  | 9.255482 | Stalled      | chr15:73340989-73402672   | 59.684  |
| <b>Ccdc33</b>        | 206 | 0  | 3.433498 | 127  | 2.116667 | 0.049958 | 0.363552 | Unclassified | chr9:57876488-57952032    | 73.545  |
| <b>Rbm19</b>         | 206 | 0  | 3.433498 | 1597 | 26.61667 | 7.65528  | 6.115106 | Stalled      | chr5:120564521-120648980  | 82.46   |
| <b>Traf3</b>         | 206 | 0  | 3.433498 | 2301 | 38.35    | 9.56636  | 6.513997 | Stalled      | chr12:112402758-112505359 | 100.602 |
| <b>Dgkg</b>          | 206 | 0  | 3.433498 | 419  | 6.983333 | 0.507531 | 8.101784 | Stalled      | chr16:22466641-22659304   | 190.664 |
| <b>Aup1</b>          | 205 | 0  | 3.41683  | 145  | 2.416667 | 92.7885  | 6.27129  | Stalled      | chr6:83002646-83007676    | 3.031   |
| <b>38960</b>         | 205 | 0  | 3.41683  | 65   | 1.083333 | 95.798   | 4.153665 | Stalled      | chr7:134357955-134363959  | 4.005   |
| <b>Stk11ip</b>       | 205 | 0  | 3.41683  | 232  | 3.866667 | 6.29165  | 11.69962 | Stalled      | chr1:75516103-75533910    | 15.808  |
| <b>Cct7</b>          | 205 | 0  | 3.41683  | 642  | 10.7     | 89.8554  | 9.516802 | Stalled      | chr6:85399498-85418471    | 16.974  |
| <b>A730011L01Rik</b> | 205 | 0  | 3.41683  | 271  | 4.516667 | 3.60576  | 22.75839 | Stalled      | chr11:119350933-119372779 | 19.847  |
| <b>Zbtb17</b>        | 205 | 0  | 3.41683  | 789  | 13.15    | 12.3054  | 5.516644 | Stalled      | chr4:140998587-141023852  | 23.266  |
| <b>Whxc2</b>         | 205 | 0  | 3.41683  | 567  | 9.45     | 15.6183  | 26.27175 | Stalled      | chr5:34240828-34280907    | 38.08   |
| <b>Pnk</b>           | 205 | 0  | 3.41683  | 2762 | 46.03333 | 31.3405  | 4.31115  | Stalled      | chr14:8928726-8997625     | 66.9    |
| <b>Bst2</b>          | 204 | 0  | 3.400163 | 56   | 0.933333 | 66.4789  | 4.976898 | Stalled      | chr8:74058160-74063336    | 3.177   |
| <b>Ado</b>           | 204 | 0  | 3.400163 | 149  | 2.483333 | 9.10465  | 5.94167  | Stalled      | chr10:67007260-67013703   | 4.444   |

|                      |     |     |          |      |          |          |          |              |                           |         |
|----------------------|-----|-----|----------|------|----------|----------|----------|--------------|---------------------------|---------|
| <b>Mbd3</b>          | 204 | 0   | 3.400163 | 444  | 7.4      | 71.4104  | 8.105881 | Stalled      | chr10:79855285-79864224   | 6.94    |
| <b>Ing1</b>          | 204 | 0   | 3.400163 | 691  | 11.51667 | 22.088   | 4.755827 | Stalled      | chr8:11554065-11563250    | 7.186   |
| <b>Zppb2</b>         | 204 | 74  | 3.400163 | 22   | 0.366667 | 8.18791  | 96.10137 | Stalled      | chr11:98410410-98419977   | 7.568   |
| <b>Sh2d2a</b>        | 204 | 0   | 3.400163 | 270  | 4.5      | 12.5105  | 1.305344 | Elongating   | chr3:87648932-87659644    | 8.713   |
| <b>Hnrrpa2b1</b>     | 204 | 43  | 3.400163 | 737  | 12.28333 | 305.009  | 8.069867 | Stalled      | chr6:51410433-51421893    | 9.461   |
| <b>Akt1</b>          | 204 | 0   | 3.400163 | 844  | 14.06667 | 65.4285  | 3.965955 | Stalled      | chr12:113892031-113914487 | 20.457  |
| <b>Rhd</b>           | 204 | 0   | 3.400163 | 85   | 1.416667 | 0.499542 | 1.059765 | Unclassified | chr4:134418450-134452086  | 31.637  |
| <b>Hps3</b>          | 204 | 0   | 3.400163 | 346  | 5.766667 | 7.1913   | 30.74343 | Stalled      | chr3:19895945-19937310    | 39.366  |
| <b>Cacna1b</b>       | 204 | 0   | 3.400163 | 603  | 10.05    | 1.62631  | 9.854506 | Stalled      | chr2:24461894-24620672    | 156.779 |
| <b>Rhob</b>          | 203 | 0   | 3.383495 | 66   | 1.1      | 22.054   | 7.653537 | Stalled      | chr12:8504564-8508791     | 2.228   |
| <b>Manf</b>          | 203 | 0   | 3.383495 | 432  | 7.2      | 86.7019  | 3.876873 | Stalled      | chr9:106789745-106796269  | 4.525   |
| <b>Atp1b2</b>        | 203 | 0   | 3.383495 | 12   | 0.2      | 1.19532  | 13.32373 | Stalled      | chr11:69413251-69421462   | 6.212   |
| <b>F12</b>           | 203 | 0   | 3.383495 | 31   | 0.516667 | 0.516313 | 1.009063 | Unclassified | chr13:55519326-55530163   | 8.838   |
| <b>Abca3</b>         | 203 | 0   | 3.383495 | 157  | 2.616667 | 4.64702  | 4.505757 | Stalled      | chr2:25282193-25304059    | 19.867  |
| <b>1500002020Rik</b> | 203 | 0   | 3.383495 | 530  | 8.833333 | 14.1973  | 13.47953 | Stalled      | chr7:25182646-25207796    | 23.151  |
| <b>Usp1</b>          | 203 | 0   | 3.383495 | 557  | 9.283333 | 8.25526  | 25.50432 | Stalled      | chr5:149994135-150027010  | 30.876  |
| <b>Stk40</b>         | 203 | 0   | 3.383495 | 489  | 8.15     | 16.4959  | 10.92345 | Stalled      | chr4:125779200-125818272  | 37.073  |
| <b>Lym</b>           | 203 | 0   | 3.383495 | 1643 | 27.38333 | 12.7191  | 22.17188 | Stalled      | chr4:3603267-3718759      | 113.493 |
| <b>Lymr4</b>         | 203 | 0   | 3.383495 | 457  | 7.616667 | 2.14851  | 26.83857 | Stalled      | chr13:36070665-36211226   | 138.562 |
| <b>Sh3bgr13</b>      | 202 | 0   | 3.366828 | 38   | 0.633333 | 345.982  | 3.831365 | Unclassified | chr4:133683320-133686668  | 1.349   |
| <b>Cd79a</b>         | 202 | 0   | 3.366828 | 356  | 5.933333 | 320.291  | 3.701452 | Stalled      | chr7:25680529-25687216    | 4.688   |
| <b>Tmem115</b>       | 202 | 0   | 3.366828 | 109  | 1.816667 | 23.5844  | 3.920107 | Stalled      | chr9:107434275-107440987  | 4.713   |
| <b>Phf5a</b>         | 202 | 48  | 3.366828 | 297  | 4.95     | 28.3609  | 5.045587 | Stalled      | chr15:81694945-81704322   | 7.378   |
| <b>Sh3glb2</b>       | 202 | 0   | 3.366828 | 278  | 4.633333 | 17.0721  | 1.934666 | Elongating   | chr2:30200328-30216751    | 14.424  |
| <b>Suds3</b>         | 202 | 0   | 3.366828 | 442  | 7.366667 | 29.0555  | 5.762172 | Stalled      | chr5:117541688-117568002  | 24.315  |
| <b>Tbc1d10a</b>      | 202 | 0   | 3.366828 | 251  | 4.183333 | 10.8917  | 19.16606 | Stalled      | chr11:4084835-4115508     | 28.674  |
| <b>4930519G04Rik</b> | 202 | 0   | 3.366828 | 81   | 1.35     | 0.015676 | 0        | Unclassified | chr5:115301722-115333888  | 30.167  |
| <b>Wipf2</b>         | 202 | 0   | 3.366828 | 530  | 8.833333 | 2.62309  | 8.7565   | Stalled      | chr11:98722911-98766892   | 41.982  |
| <b>Gne</b>           | 202 | 0   | 3.366828 | 874  | 14.56667 | 3.96153  | 0.638321 | Stalled      | chr4:44046947-44099049    | 50.103  |
| <b>Trmt12</b>        | 201 | 0   | 3.350161 | 78   | 1.3      | 6.96047  | 5.523726 | Stalled      | chr15:58702203-58708336   | 4.134   |
| <b>Chrne</b>         | 201 | 0   | 3.350161 | 163  | 2.716667 | 3.13315  | 0.039841 | Stalled      | chr11:70428384-70434696   | 4.313   |
| <b>Calm1</b>         | 201 | 0   | 3.350161 | 637  | 10.61667 | 87.8125  | 8.216404 | Stalled      | chr12:101435750-101448016 | 10.267  |
| <b>Slc38a8</b>       | 201 | 0   | 3.350161 | 53   | 0.883333 | 0.141616 | 3.131935 | Unclassified | chr8:122003502-122027598  | 22.097  |
| <b>Echdc3</b>        | 201 | 0   | 3.350161 | 658  | 10.96667 | 0.954859 | 1.45012  | Elongating   | chr2:6109510-6136040      | 24.531  |
| <b>Inpp1</b>         | 201 | 0   | 3.350161 | 242  | 4.033333 | 11.008   | 6.278976 | Stalled      | chr1:52846263-52876532    | 28.27   |
| <b>Nfe212</b>        | 201 | 0   | 3.350161 | 722  | 12.03333 | 5.83342  | 12.89741 | Stalled      | chr2:75513575-75544698    | 29.124  |
| <b>Ccdc63</b>        | 201 | 0   | 3.350161 | 159  | 2.65     | 0.129118 | 0.925748 | Unclassified | chr5:122558064-122590071  | 30.008  |
| <b>Cytip</b>         | 201 | 306 | 3.350161 | 841  | 14.01667 | 8.82679  | 5.47382  | Stalled      | chr2:57981549-58014533    | 30.985  |
| <b>Cacna1h</b>       | 201 | 0   | 3.350161 | 320  | 5.333333 | 3.39922  | 3.090837 | Stalled      | chr17:25511236-25572728   | 59.493  |
| <b>Rps11</b>         | 200 | 0   | 3.333493 | 194  | 3.233333 | 378.826  | 4.299975 | Stalled      | chr7:52377757-52381759    | 2.003   |
| <b>Tnfrsf13c</b>     | 200 | 0   | 3.333493 | 190  | 3.166667 | 161.279  | 4.193117 | Stalled      | chr15:82052173-82056766   | 2.594   |
| <b>Tomt</b>          | 200 | 0   | 3.333493 | 185  | 3.083333 | 2.46963  | 6.644262 | Stalled      | chr7:109048321-109056873  | 6.553   |
| <b>Midn</b>          | 200 | 0   | 3.333493 | 972  | 16.2     | 26.9445  | 0.888393 | Stalled      | chr10:79609034-79621112   | 10.079  |
| <b>Ccdc130</b>       | 200 | 0   | 3.333493 | 149  | 2.483333 | 3.10774  | 16.35273 | Stalled      | chr8:86781693-86796259    | 12.567  |
| <b>Atp8b2</b>        | 200 | 0   | 3.333493 | 617  | 10.28333 | 16.1561  | 5.541102 | Stalled      | chr3:89743402-89769430    | 24.029  |
| <b>Dagla</b>         | 200 | 0   | 3.333493 | 144  | 2.4      | 0.090993 | 2.025023 | Unclassified | chr19:10319754-10381367   | 59.614  |
| <b>Ssh2</b>          | 200 | 0   | 3.333493 | 1554 | 25.9     | 4.52958  | 61.38732 | Stalled      | chr11:77027926-77269050   | 239.125 |
| <b>Dis3l2</b>        | 200 | 0   | 3.333493 | 1132 | 18.86667 | 3.81766  | 35.52419 | Stalled      | chr1:88598417-88946667    | 346.251 |
| <b>Emg1</b>          | 199 | 0   | 3.316826 | 366  | 6.1      | 77.2809  | 6.173247 | Stalled      | chr6:124654388-124664196  | 7.809   |
| <b>Kank3</b>         | 199 | 0   | 3.316826 | 982  | 16.36667 | 3.94029  | 0.045875 | Stalled      | chr17:33945467-33959859   | 12.393  |
| <b>Fchsd2</b>        | 199 | 55  | 3.316826 | 3936 | 65.6     | 18.1387  | 11.51289 | Stalled      | chr7:108255288-108432919  | 175.632 |
| <b>Tlcd1</b>         | 198 | 0   | 3.300158 | 178  | 2.966667 | 6.21254  | 2.899982 | Stalled      | chr11:77990267-77994274   | 2.008   |
| <b>Neur1</b>         | 198 | 0   | 3.300158 | 55   | 0.916667 | 17.7234  | 6.438208 | Stalled      | chr2:164656229-164661096  | 2.868   |
| <b>Ppm1g</b>         | 198 | 0   | 3.300158 | 421  | 7.016667 | 96.2145  | 19.92889 | Stalled      | chr5:31505040-31524918    | 17.879  |
| <b>Agxt12</b>        | 198 | 0   | 3.300158 | 2610 | 43.5     | 5.19011  | 2.439616 | Elongating   | chr11:51396258-51416771   | 18.514  |
| <b>Rasd1</b>         | 197 | 0   | 3.283491 | 85   | 1.416667 | 17.0037  | 3.638134 | Unclassified | chr11:59776684-59780444   | 1.761   |
| <b>Tmem176a</b>      | 197 | 0   | 3.283491 | 173  | 2.883333 | 54.4704  | 2.786568 | Stalled      | chr6:48789481-48795363    | 3.883   |
| <b>Pddc1</b>         | 197 | 0   | 3.283491 | 58   | 0.966667 | 9.16848  | 13.66446 | Stalled      | chr7:148594082-148602024  | 5.943   |
| <b>Mrps18b</b>       | 197 | 47  | 3.283491 | 188  | 3.133333 | 11.7212  | 9.688527 | Stalled      | chr17:36047329-36055314   | 5.986   |
| <b>H2-DMb1</b>       | 197 | 0   | 3.283491 | 593  | 9.883333 | 108.286  | 3.176082 | Stalled      | chr17:34288135-34297174   | 7.04    |
| <b>2310044G17Rik</b> | 197 | 0   | 3.283491 | 223  | 3.716667 | 4.91186  | 24.08894 | Stalled      | chr12:88286360-88304755   | 16.396  |
| <b>Nop14</b>         | 197 | 0   | 3.283491 | 598  | 9.966667 | 18.0072  | 11.26313 | Stalled      | chr5:34981184-35004797    | 21.614  |
| <b>Csf1r</b>         | 197 | 0   | 3.283491 | 142  | 2.366667 | 0.277733 | 0.590002 | Unclassified | chr18:61263225-61290793   | 25.569  |
| <b>Elmo2</b>         | 197 | 0   | 3.283491 | 482  | 8.033333 | 5.60551  | 6.776976 | Stalled      | chr2:165113530-165153979  | 38.45   |
| <b>Sic7a7</b>        | 197 | 0   | 3.283491 | 460  | 7.666667 | 2.45757  | 1.191386 | Stalled      | chr14:54989127-55038536   | 47.41   |
| <b>Pitpnm2</b>       | 197 | 0   | 3.283491 | 1545 | 25.75    | 7.38923  | 1.060552 | Elongating   | chr5:124568698-124668427  | 97.73   |
| <b>Mtor</b>          | 197 | 0   | 3.283491 | 1107 | 18.45    | 6.3669   | 18.68304 | Stalled      | chr4:147820690-147931793  | 109.104 |
| <b>Ly6a</b>          | 196 | 90  | 3.266823 | 232  | 3.866667 | 322.515  | 0.774188 | Elongating   | chr15:74825306-74830318   | 3.013   |
| <b>4933403G14Rik</b> | 196 | 0   | 3.266823 | 56   | 0.933333 | 1.02558  | 3.831184 | Stalled      | chr8:128191717-128197265  | 3.549   |
| <b>Eif4a2</b>        | 196 | 55  | 3.266823 | 777  | 12.95    | 39.228   | 3.757211 | Stalled      | chr16:23105551-23114205   | 6.655   |
| <b>Dhx58</b>         | 196 | 0   | 3.266823 | 306  | 5.1      | 24.7721  | 2.828451 | Stalled      | chr11:100556197-100567585 | 9.389   |
| <b>Ndufa8</b>        | 196 | 0   | 3.266823 | 106  | 1.766667 | 78.7204  | 13.28213 | Stalled      | chr2:35891853-35906812    | 12.96   |
| <b>Esyt1</b>         | 196 | 0   | 3.266823 | 295  | 4.916667 | 32.8579  | 12.31698 | Stalled      | chr10:127947305-127964915 | 15.611  |
| <b>Thumpd3</b>       | 196 | 0   | 3.266823 | 510  | 8.5      | 14.9538  | 23.04111 | Stalled      | chr6:112994320-113018267  | 21.948  |
| <b>Scamp2</b>        | 196 | 0   | 3.266823 | 747  | 12.45    | 19.9119  | 7.773725 | Stalled      | chr9:57406750-57436605    | 27.856  |
| <b>Rfx1</b>          | 196 | 0   | 3.266823 | 704  | 11.73333 | 8.54166  | 8.152936 | Stalled      | chr8:86588734-86620891    | 30.158  |
| <b>Lrch1</b>         | 196 | 0   | 3.266823 | 1822 | 30.36667 | 5.27887  | 12.8824  | Stalled      | chr14:75154479-75349684   | 193.206 |
| <b>Cdk2ap2</b>       | 195 | 0   | 3.250156 | 14   | 0.233333 | 67.0395  | 13.66239 | Unclassified | chr19:4095350-4099017     | 1.668   |
| <b>Fam173a</b>       | 195 | 0   | 3.250156 | 14   | 0.233333 | 33.6475  | 14.24899 | Unclassified | chr17:25927450-25931229   | 1.78    |
| <b>B3gnt9</b>        | 195 | 0   | 3.250156 | 29   | 0.483333 | 4.25093  | 1.836965 | Elongating   | chr8:107776537-107781051  | 2.515   |
| <b>Sirt6</b>         | 195 | 0   | 3.250156 | 86   | 1.433333 | 16.5021  | 14.18136 | Stalled      | chr10:81084530-81092353   | 5.824   |
| <b>Sdhb</b>          | 195 | 0   | 3.250156 | 544  | 9.066667 | 75.4762  | 5.702114 | Stalled      | chr4:140515185-140535107  | 17.923  |
| <b>Spes2</b>         | 195 | 0   | 3.250156 | 599  | 9.983333 | 34.3848  | 7.774532 | Stalled      | chr7:106986078-107009393  | 21.316  |
| <b>Rel</b>           | 195 | 78  | 3.250156 | 742  | 12.36667 | 12.0266  | 17.16046 | Stalled      | chr11:23641728-23672970   | 29.243  |
| <b>Cd9</b>           | 195 | 0   | 3.250156 | 256  | 4.266667 | 7.85073  | 4.62757  | Stalled      | chr6:125410283-125446773  | 34.491  |
| <b>Abca3</b>         | 195 | 0   | 3.250156 | 656  | 10.93333 | 7.43833  | 18.67412 | Stalled      | chr17:24486990-24547146   | 58.157  |

|                      |     |     |          |      |          |          |          |              |                           |         |
|----------------------|-----|-----|----------|------|----------|----------|----------|--------------|---------------------------|---------|
| <b>Mark2</b>         | 195 | 0   | 3.250156 | 1221 | 20.35    | 19.8849  | 6.308679 | Stalled      | chr19:7349885-7418334     | 66.45   |
| <b>O610011F06Rik</b> | 194 | 0   | 3.233488 | 11   | 0.183333 | 30.414   | 8.665238 | Unclassified | chr17:26010444-26014108   | 1.665   |
| <b>Gadd45b</b>       | 194 | 0   | 3.233488 | 161  | 2.683333 | 37.361   | 2.352219 | Stalled      | chr10:80390835-80394949   | 2.115   |
| <b>Ptger4</b>        | 194 | 0   | 3.233488 | 526  | 8.766667 | 8.94016  | 4.0906   | Stalled      | chr15:5183405-5195682     | 10.278  |
| <b>Grm6</b>          | 194 | 0   | 3.233488 | 188  | 3.133333 | 18.3323  | 8.391186 | Stalled      | chr11:50662186-50679710   | 15.525  |
| <b>Prpf40b</b>       | 194 | 0   | 3.233488 | 513  | 8.55     | 1.94672  | 2.354948 | Elongating   | chr15:99123839-99147438   | 21.6    |
| <b>Pppde2</b>        | 194 | 0   | 3.233488 | 292  | 4.866667 | 12.8542  | 33.14281 | Stalled      | chr15:81822952-81848570   | 23.619  |
| <b>Got2</b>          | 194 | 0   | 3.233488 | 571  | 9.516667 | 65.5249  | 6.528465 | Stalled      | chr8:98388036-98414265    | 24.23   |
| <b>Nfic</b>          | 194 | 0   | 3.233488 | 278  | 4.633333 | 2.00889  | 1.752403 | Elongating   | chr10:80858935-80891918   | 30.984  |
| <b>Raf1</b>          | 194 | 0   | 3.233488 | 861  | 14.35    | 20.7212  | 24.92491 | Stalled      | chr6:115568590-115628653  | 58.064  |
| <b>Slc6a6</b>        | 194 | 0   | 3.233488 | 1597 | 26.61667 | 13.9913  | 12.08914 | Stalled      | chr6:91632060-91709055    | 74.996  |
| <b>Xpo7</b>          | 194 | 0   | 3.233488 | 791  | 13.18333 | 4.09859  | 16.66346 | Stalled      | chr14:71054052-71168435   | 112.384 |
| <b>Gm962</b>         | 193 | 0   | 3.216821 | 71   | 1.183333 | 6.18756  | 6.520133 | Stalled      | chr19:5566073-5571261     | 3.189   |
| <b>Clec11a</b>       | 193 | 0   | 3.216821 | 405  | 6.75     | 9.05179  | 0.037665 | Stalled      | chr7:51559139-51564329    | 3.191   |
| <b>Cenpm</b>         | 193 | 0   | 3.216821 | 290  | 4.833333 | 32.0426  | 8.211842 | Stalled      | chr15:82064205-82077177   | 10.973  |
| <b>P4hb</b>          | 193 | 0   | 3.216821 | 274  | 4.566667 | 130.197  | 16.37364 | Stalled      | chr11:120421617-120436250 | 12.634  |
| <b>Icam1</b>         | 193 | 0   | 3.216821 | 674  | 11.23333 | 29.913   | 8.388669 | Stalled      | chr9:20818403-20833240    | 12.838  |
| <b>Usp5</b>          | 193 | 53  | 3.216821 | 307  | 5.116667 | 36.05    | 14.92083 | Stalled      | chr6:124765036-124781465  | 14.43   |
| <b>Cd274</b>         | 193 | 168 | 3.216821 | 721  | 12.01667 | 4.48242  | 4.431952 | Stalled      | chr19:29439927-29462582   | 20.656  |
| <b>Tmem120b</b>      | 193 | 0   | 3.216821 | 234  | 3.9      | 3.6378   | 37.80246 | Stalled      | chr5:123524283-123567454  | 41.172  |
| <b>Lrmp</b>          | 193 | 59  | 3.216821 | 3192 | 53.2     | 46.7822  | 4.858432 | Stalled      | chr6:145068258-145123448  | 53.191  |
| <b>Cd52</b>          | 192 | 0   | 3.200153 | 122  | 2.033333 | 547.22   | 1.717881 | Unclassified | chr4:133649452-133652988  | 1.537   |
| <b>Mrp112</b>        | 192 | 0   | 3.200153 | 129  | 2.15     | 72.6215  | 10.16637 | Stalled      | chr11:120343982-120350068 | 4.087   |
| <b>Irf9</b>          | 192 | 0   | 3.200153 | 378  | 6.3      | 21.2235  | 5.888489 | Stalled      | chr14:56220821-56228866   | 6.046   |
| <b>Cdkn1a</b>        | 192 | 0   | 3.200153 | 226  | 3.766667 | 11.3384  | 3.284542 | Stalled      | chr17:29228716-29237667   | 6.952   |
| <b>Cabp7</b>         | 192 | 0   | 3.200153 | 29   | 0.483333 | 0.128347 | 0.193526 | Unclassified | chr11:4638823-4648781     | 7.959   |
| <b>Pkp3</b>          | 192 | 0   | 3.200153 | 161  | 2.683333 | 8.80389  | 0.114114 | Stalled      | chr7:148263667-148276408  | 10.742  |
| <b>Mrp139</b>        | 192 | 0   | 3.200153 | 396  | 6.6      | 15.9937  | 7.682648 | Stalled      | chr16:84718525-84737426   | 16.902  |
| <b>3010026O09Rik</b> | 192 | 0   | 3.200153 | 487  | 8.116667 | 7.07611  | 14.23821 | Stalled      | chr11:49986352-50013616   | 25.265  |
| <b>Cep78</b>         | 192 | 0   | 3.200153 | 102  | 1.7      | 4.06694  | 41.82274 | Stalled      | chr19:16030262-16061479   | 29.218  |
| <b>Sdf211</b>        | 191 | 92  | 3.183486 | 108  | 1.8      | 181.365  | 5.924126 | Stalled      | chr16:17130230-17134476   | 2.247   |
| <b>Fbx15</b>         | 191 | 0   | 3.183486 | 71   | 1.183333 | 14.4242  | 3.550758 | Stalled      | chr19:46400673-46404936   | 2.264   |
| <b>Rps5</b>          | 191 | 0   | 3.183486 | 512  | 8.533333 | 1112.34  | 3.727267 | Stalled      | chr7:13505659-13512034    | 4.376   |
| <b>Tubb5</b>         | 191 | 0   | 3.183486 | 871  | 14.51667 | 281.226  | 0.932432 | Elongating   | chr17:35970864-35977246   | 4.383   |
| <b>Irf3</b>          | 191 | 0   | 3.183486 | 346  | 5.766667 | 28.8082  | 2.787829 | Stalled      | chr7:52251029-52258218    | 5.19    |
| <b>Ccdc142</b>       | 191 | 0   | 3.183486 | 255  | 4.25     | 48.8606  | 2.399267 | Elongating   | chr6:83049509-83059115    | 7.607   |
| <b>Pcyox11</b>       | 191 | 0   | 3.183486 | 239  | 3.983333 | 7.12846  | 10.24116 | Stalled      | chr18:61856490-61869289   | 10.8    |
| <b>Mthfsd</b>        | 191 | 0   | 3.183486 | 227  | 3.783333 | 9.63475  | 10.41205 | Stalled      | chr8:123621456-123634279  | 10.824  |
| <b>Fam63a</b>        | 191 | 0   | 3.183486 | 133  | 2.216667 | 7.61823  | 9.8446   | Stalled      | chr3:95084865-95100083    | 13.219  |
| <b>Cndp2</b>         | 191 | 0   | 3.183486 | 260  | 4.333333 | 16.0092  | 11.02425 | Stalled      | chr18:84836860-84857025   | 18.166  |
| <b>Arhgef2</b>       | 191 | 0   | 3.183486 | 550  | 9.166667 | 17.5648  | 9.461062 | Stalled      | chr3:88423027-88451974    | 26.948  |
| <b>Sik3</b>          | 191 | 0   | 3.183486 | 2451 | 40.85    | 8.71772  | 6.956209 | Stalled      | chr9:45818902-46032277    | 211.376 |
| <b>Pgam2</b>         | 190 | 0   | 3.166818 | 91   | 1.516667 | 2.31956  | 0.340133 | Stalled      | chr11:5701639-5705799     | 2.161   |
| <b>Spsb3</b>         | 190 | 0   | 3.166818 | 393  | 6.55     | 16.1417  | 0.453104 | Stalled      | chr17:25022425-25029092   | 4.668   |
| <b>Rpl3</b>          | 190 | 0   | 3.166818 | 1705 | 28.41667 | 115.277  | 1.908039 | Elongating   | chr15:79908210-79915836   | 5.627   |
| <b>Rsemb3</b>        | 190 | 0   | 3.166818 | 354  | 5.9      | 61.2746  | 5.269944 | Stalled      | chr11:97562747-97574814   | 10.068  |
| <b>Rsp9</b>          | 190 | 0   | 3.166818 | 196  | 3.266667 | 4.20333  | 2.056054 | Elongating   | chr17:46266225-46283147   | 14.923  |
| <b>Entpd7</b>        | 190 | 0   | 3.166818 | 420  | 7        | 1.67091  | 13.04768 | Stalled      | chr19:43762178-43808343   | 44.166  |
| <b>Sltm</b>          | 190 | 0   | 3.166818 | 526  | 8.766667 | 17.6843  | 33.65609 | Stalled      | chr9:70388584-70440039    | 49.456  |
| <b>Foxp4</b>         | 190 | 0   | 3.166818 | 915  | 15.25    | 22.7684  | 14.53961 | Stalled      | chr17:48004081-48063581   | 57.501  |
| <b>Oxct1</b>         | 190 | 0   | 3.166818 | 873  | 14.55    | 27.4344  | 25.56014 | Stalled      | chr15:39744247-4105344    | 128.918 |
| <b>Setbp1</b>        | 190 | 66  | 3.166818 | 2342 | 39.03333 | 1.98793  | 11.13813 | Stalled      | chr18:78947118-79308130   | 359.013 |
| <b>Poir2i</b>        | 189 | 0   | 3.150151 | 7    | 0.116667 | 27.0206  | 14.1244  | Unclassified | chr7:31015092-31018406    | 1.315   |
| <b>Tssc4</b>         | 189 | 0   | 3.150151 | 63   | 1.05     | 55.1039  | 4.503351 | Unclassified | chr7:150253272-150256992  | 1.721   |
| <b>Gngt2</b>         | 189 | 0   | 3.150151 | 41   | 0.683333 | 0        | 11.4497  | Stalled      | chr11:95701608-95707045   | 3.438   |
| <b>Rpl22</b>         | 189 | 0   | 3.150151 | 667  | 11.11667 | 129.4    | 3.404364 | Stalled      | chr4:151697986-151708180  | 8.195   |
| <b>Brms1</b>         | 189 | 0   | 3.150151 | 157  | 2.616667 | 22.2777  | 7.034678 | Stalled      | chr19:5039403-5049917     | 8.515   |
| <b>Tmem109</b>       | 189 | 0   | 3.150151 | 250  | 4.166667 | 15.2528  | 7.172153 | Stalled      | chr19:10945151-10958233   | 11.083  |
| <b>Btnl2</b>         | 189 | 0   | 3.150151 | 162  | 2.7      | 2.02493  | 5.759188 | Stalled      | chr17:34489766-34506437   | 14.672  |
| <b>Trim8</b>         | 189 | 0   | 3.150151 | 545  | 9.083333 | 17.4335  | 3.360762 | Stalled      | chr19:46574137-46590945   | 14.809  |
| <b>Atp13a1</b>       | 189 | 0   | 3.150151 | 975  | 16.25    | 24.7649  | 6.922576 | Stalled      | chr8:72313061-72331645    | 16.585  |
| <b>Zmiz2</b>         | 189 | 0   | 3.150151 | 738  | 12.3     | 44.4511  | 4.716105 | Stalled      | chr11:6287366-6306165     | 16.8    |
| <b>Arhgdib</b>       | 189 | 0   | 3.150151 | 1160 | 19.33333 | 360.79   | 3.280575 | Stalled      | chr6:136872229-136892238  | 18.01   |
| <b>Litaf</b>         | 189 | 38  | 3.150151 | 532  | 8.866667 | 8.37392  | 8.374133 | Stalled      | chr16:10959367-10995214   | 33.848  |
| <b>Msra</b>          | 189 | 0   | 3.150151 | 1334 | 22.23333 | 8.48125  | 0.199414 | Unclassified | chr14:64741461-65076740   | 333.28  |
| <b>Jtb</b>           | 188 | 0   | 3.133483 | 49   | 0.816667 | 51.2547  | 25.65193 | Stalled      | chr3:90033518-90039762    | 4.245   |
| <b>Mybph</b>         | 188 | 0   | 3.133483 | 44   | 0.733333 | 0.066313 | 0.267239 | Unclassified | chr1:136088024-136097809  | 7.786   |
| <b>2310003H01Rik</b> | 188 | 0   | 3.133483 | 108  | 1.8      | 4.58517  | 13.10481 | Stalled      | chr11:120230875-120242060 | 9.186   |
| <b>Nfil3</b>         | 188 | 0   | 3.133483 | 1899 | 31.65    | 70.6957  | 3.751945 | Stalled      | chr13:53062577-53078408   | 13.832  |
| <b>Best1</b>         | 188 | 0   | 3.133483 | 338  | 5.633333 | 0.240075 | 0.218736 | Stalled      | chr19:10059661-10078123   | 16.463  |
| <b>Tkt</b>           | 188 | 0   | 3.133483 | 1391 | 23.18333 | 105.124  | 8.628137 | Stalled      | chr14:31360334-31387908   | 25.575  |
| <b>Celsr3</b>        | 188 | 0   | 3.133483 | 110  | 1.833333 | 0.379502 | 1.134573 | Unclassified | chr9:108726650-108755300  | 26.651  |
| <b>Gls</b>           | 188 | 0   | 3.133483 | 1660 | 27.66667 | 10.7627  | 17.10863 | Stalled      | chr1:52220293-52292076    | 69.784  |
| <b>Kdm2a</b>         | 188 | 0   | 3.133483 | 1241 | 20.68333 | 13.4979  | 10.04496 | Stalled      | chr19:4316146-4399077     | 80.932  |
| <b>Grk4</b>          | 188 | 0   | 3.133483 | 90   | 1.5      | 4.5626   | 176.6928 | Stalled      | chr5:35001027-35097952    | 94.926  |
| <b>Dyrk1a</b>        | 188 | 0   | 3.133483 | 2555 | 42.58333 | 5.56049  | 9.232313 | Stalled      | chr16:94789812-94917126   | 125.315 |
| <b>Hist1h1b</b>      | 187 | 64  | 3.116816 | 0    | 0        | 16.8189  | 907      | Unclassified | chr13:21871751-21874423   | 0.673   |
| <b>4930404N11Rik</b> | 187 | 0   | 3.116816 | 58   | 0.966667 | 6.04068  | 2.836525 | Unclassified | chr10:80826768-80830565   | 1.798   |
| <b>Mfsd3</b>         | 187 | 0   | 3.116816 | 74   | 1.233333 | 8.04938  | 4.803049 | Stalled      | chr15:76529971-76534669   | 2.699   |
| <b>Rassf7</b>        | 187 | 0   | 3.116816 | 14   | 0.233333 | 4.78149  | 22.78481 | Stalled      | chr7:148399758-148404557  | 2.8     |
| <b>Ifi30</b>         | 187 | 0   | 3.116816 | 339  | 5.65     | 279.919  | 4.62697  | Stalled      | chr8:73286671-73292562    | 3.892   |
| <b>C130050O18Rik</b> | 187 | 0   | 3.116816 | 194  | 3.233333 | 0        | 0.515443 | Stalled      | chr5:139880340-139892046  | 9.707   |
| <b>Nfkbil2</b>       | 187 | 0   | 3.116816 | 233  | 3.883333 | 9.23431  | 9.713188 | Stalled      | chr15:76456666-76472359   | 13.694  |
| <b>Akap3</b>         | 187 | 0   | 3.116816 | 224  | 3.733333 | 7.2361   | 15.56152 | Stalled      | chr4:155263983-155281360  | 15.378  |
| <b>Hn1</b>           | 187 | 0   | 3.116816 | 409  | 6.816667 | 90.183   | 14.4353  | Stalled      | chr11:115358666-115377684 | 17.019  |
| <b>Tgfb1</b>         | 187 | 0   | 3.116816 | 997  | 16.61667 | 51.249   | 3.436089 | Stalled      | chr7:26470020-26490015    | 17.996  |

|                      |     |     |          |      |          |          |          |              |                           |         |
|----------------------|-----|-----|----------|------|----------|----------|----------|--------------|---------------------------|---------|
| <b>Gpr55</b>         | 187 | 74  | 3.116816 | 239  | 3.983333 | 4.70295  | 5.139488 | Stalled      | chr1:87836111-87859630    | 21.52   |
| <b>BC003331</b>      | 187 | 0   | 3.116816 | 122  | 2.033333 | 5.79327  | 67.02904 | Stalled      | chr1:152208440-152242185  | 31.746  |
| <b>Rnf43</b>         | 187 | 0   | 3.116816 | 332  | 5.533333 | 1.721    | 4.073431 | Stalled      | chr11:87474588-87549041   | 72.454  |
| <b>Ttc7</b>          | 187 | 0   | 3.116816 | 1698 | 28.3     | 12.9362  | 19.23828 | Stalled      | chr17:87680225-87781098   | 98.874  |
| <b>Nudt8</b>         | 186 | 0   | 3.100149 | 12   | 0.2      | 16.0594  | 12.00798 | Unclassified | chr19:3998579-4002102     | 1.524   |
| <b>Slc25a11</b>      | 186 | 0   | 3.100149 | 47   | 0.783333 | 31.097   | 12.30649 | Stalled      | chr11:70457698-70462495   | 2.798   |
| <b>Maz</b>           | 186 | 0   | 3.100149 | 423  | 7.05     | 114.65   | 1.592217 | Elongating   | chr7:134165650-134171993  | 4.344   |
| <b>Nkiras2</b>       | 186 | 0   | 3.100149 | 364  | 6.066667 | 17.0042  | 1.875868 | Elongating   | chr11:100482268-100488916 | 4.649   |
| <b>Mamstr</b>        | 186 | 0   | 3.100149 | 116  | 1.933333 | 0.893498 | 0.157541 | Stalled      | chr7:52893362-52901117    | 5.756   |
| <b>Polg2</b>         | 186 | 45  | 3.100149 | 132  | 2.2      | 10.718   | 49.73812 | Stalled      | chr11:106629517-106642851 | 11.335  |
| <b>Gramd1a</b>       | 186 | 0   | 3.100149 | 584  | 9.733333 | 23.7218  | 6.697479 | Stalled      | chr7:31915145-31938069    | 20.925  |
| <b>Deaf1</b>         | 186 | 0   | 3.100149 | 363  | 6.05     | 6.61741  | 12.1945  | Stalled      | chr7:148483076-148515624  | 30.549  |
| <b>Ciptm1</b>        | 186 | 0   | 3.100149 | 703  | 11.71667 | 19.0252  | 8.207296 | Stalled      | chr7:20216928-20252379    | 33.452  |
| <b>Rpn2</b>          | 186 | 0   | 3.100149 | 1125 | 18.75    | 81.6329  | 13.45748 | Stalled      | chr2:157102833-157152054  | 47.222  |
| <b>1190002A17Rik</b> | 186 | 0   | 3.100149 | 275  | 4.583333 | 0.522449 | 3.183584 | Unclassified | chr2:28553680-28668685    | 113.006 |
| <b>Rpl35</b>         | 185 | 0   | 3.083481 | 387  | 6.45     | 343.089  | 2.568037 | Stalled      | chr2:38857100-38862651    | 3.552   |
| <b>Pcvt2</b>         | 185 | 0   | 3.083481 | 286  | 4.766667 | 59.1271  | 9.505456 | Stalled      | chr11:120471400-120481204 | 7.805   |
| <b>Ttc9c</b>         | 185 | 0   | 3.083481 | 93   | 1.55     | 11.0594  | 27.87381 | Stalled      | chr19:8883564-8895784     | 10.221  |
| <b>A4galt</b>        | 185 | 0   | 3.083481 | 432  | 7.2      | 3.7019   | 6.750935 | Stalled      | chr15:83057152-83084204   | 25.053  |
| <b>Ndst1</b>         | 185 | 0   | 3.083481 | 402  | 6.7      | 6.62398  | 0.98652  | Stalled      | chr18:60845629-60875043   | 27.415  |
| <b>Eef1b2</b>        | 184 | 0   | 3.066814 | 78   | 1.3      | 518.951  | 6.585952 | Stalled      | chr1:63221704-63226230    | 2.527   |
| <b>Zfp263</b>        | 184 | 0   | 3.066814 | 154  | 2.566667 | 16.6955  | 14.07684 | Stalled      | chr16:3742098-3750788     | 6.691   |
| <b>Ahsa1</b>         | 184 | 0   | 3.066814 | 158  | 2.633333 | 103.575  | 12.09366 | Stalled      | chr12:88605677-88614902   | 7.226   |
| <b>1110014N23Rik</b> | 184 | 33  | 3.066814 | 277  | 4.616667 | 0        | 3.949034 | Stalled      | chr19:6067841-6079187     | 9.347   |
| <b>Rfc4</b>          | 184 | 0   | 3.066814 | 721  | 12.01667 | 17.7076  | 7.090762 | Stalled      | chr16:23114020-23129803   | 13.784  |
| <b>Ii10ra</b>        | 184 | 0   | 3.066814 | 726  | 12.1     | 16.9601  | 3.942997 | Stalled      | chr9:45061921-45079229    | 15.309  |
| <b>Unc13d</b>        | 184 | 0   | 3.066814 | 438  | 7.3      | 17.1702  | 7.517755 | Stalled      | chr11:115923409-115941275 | 15.867  |
| <b>Tmem63b</b>       | 184 | 0   | 3.066814 | 320  | 5.333333 | 9.18013  | 11.68528 | Stalled      | chr17:45797125-45825167   | 26.043  |
| <b>Acbd5</b>         | 184 | 0   | 3.066814 | 360  | 6        | 6.57328  | 25.82523 | Stalled      | chr2:22921720-22970032    | 46.313  |
| <b>Zfp516</b>        | 184 | 0   | 3.066814 | 281  | 4.683333 | 1.8085   | 1.550233 | Stalled      | chr18:83123010-83172107   | 47.098  |
| <b>Polr3b</b>        | 184 | 0   | 3.066814 | 1151 | 19.18333 | 6.35865  | 23.9774  | Stalled      | chr10:84083181-84189923   | 104.743 |
| <b>Myo10</b>         | 184 | 0   | 3.066814 | 426  | 7.1      | 1.22313  | 16.6633  | Stalled      | chr15:25550304-25743426   | 191.123 |
| <b>Mlx</b>           | 183 | 0   | 3.050146 | 127  | 2.116667 | 10.4954  | 5.775936 | Stalled      | chr11:100946603-100953520 | 4.918   |
| <b>Ldha</b>          | 183 | 0   | 3.050146 | 589  | 9.816667 | 429.566  | 6.907772 | Stalled      | chr7:54099173-54110996    | 9.824   |
| <b>Chrna3</b>        | 183 | 0   | 3.050146 | 24   | 0.4      | 0.073869 | 1.116071 | Unclassified | chr9:54859149-54876366    | 15.218  |
| <b>AA960436</b>      | 183 | 0   | 3.050146 | 114  | 1.9      | 9.3634   | 24.52645 | Stalled      | chr8:97854183-97871413    | 15.231  |
| <b>Top1mt</b>        | 183 | 0   | 3.050146 | 162  | 2.7      | 4.72637  | 15.10704 | Stalled      | chr15:75487462-75511220   | 21.759  |
| <b>Slc36a3</b>       | 183 | 0   | 3.050146 | 307  | 5.116667 | 0.218709 | 0.155519 | Stalled      | chr11:54938324-54967208   | 26.885  |
| <b>Phrf1</b>         | 183 | 0   | 3.050146 | 862  | 14.36667 | 18.3107  | 7.771941 | Stalled      | chr7:148412686-148448650  | 33.965  |
| <b>Golm1</b>         | 183 | 0   | 3.050146 | 193  | 3.216667 | 1.54425  | 4.956871 | Stalled      | chr13:59736356-59779145   | 40.79   |
| <b>Axin1</b>         | 183 | 0   | 3.050146 | 549  | 9.15     | 17.0509  | 19.01425 | Stalled      | chr17:26273630-26332756   | 57.127  |
| <b>Lamc1</b>         | 183 | 0   | 3.050146 | 1224 | 20.4     | 9.69644  | 13.4237  | Stalled      | chr1:155066051-155181916  | 113.866 |
| <b>C230081A13Rik</b> | 183 | 0   | 3.050146 | 824  | 13.73333 | 1.77829  | 41.942   | Stalled      | chr9:56048935-56267857    | 216.923 |
| <b>6230427J02Rik</b> | 182 | 0   | 3.033479 | 128  | 2.133333 | 22.2067  | 1.408821 | Unclassified | chr9:107886556-107890247  | 1.692   |
| <b>Ftsj3</b>         | 182 | 0   | 3.033479 | 310  | 5.166667 | 35.9733  | 5.666096 | Stalled      | chr11:106110457-106119116 | 6.66    |
| <b>Trib1</b>         | 182 | 157 | 3.033479 | 343  | 5.716667 | 5.51257  | 3.230001 | Stalled      | chr15:59478208-59488654   | 8.447   |
| <b>Trip10</b>        | 182 | 0   | 3.033479 | 77   | 1.283333 | 7.15674  | 8.507636 | Stalled      | chr17:57386873-57402846   | 13.974  |
| <b>Eef1d</b>         | 182 | 0   | 3.033479 | 528  | 8.8      | 96.1004  | 7.376879 | Stalled      | chr15:75725229-75741770   | 14.542  |
| <b>Rnmt</b>          | 182 | 0   | 3.033479 | 305  | 5.083333 | 5.0452   | 19.52891 | Stalled      | chr18:68458008-68484506   | 24.499  |
| <b>Trpv2</b>         | 182 | 0   | 3.033479 | 818  | 13.63333 | 26.6067  | 1.708095 | Elongating   | chr11:62385987-62413807   | 25.821  |
| <b>Ddx6</b>          | 182 | 0   | 3.033479 | 1650 | 27.5     | 22.9137  | 12.75901 | Stalled      | chr9:44410974-44448814    | 35.841  |
| <b>4933403F05Rik</b> | 182 | 0   | 3.033479 | 184  | 3.066667 | 1.69496  | 48.42214 | Stalled      | chr18:68419838-68461987   | 40.15   |
| <b>Nsmf</b>          | 182 | 0   | 3.033479 | 587  | 9.783333 | 9.09087  | 9.12608  | Stalled      | chr4:6323353-6383418      | 58.066  |
| <b>Slc10a7</b>       | 182 | 0   | 3.033479 | 1822 | 30.36667 | 6.32882  | 22.52386 | Stalled      | chr8:81031233-81257904    | 224.672 |
| <b>2310033P09Rik</b> | 181 | 0   | 3.016811 | 281  | 4.683333 | 25.8986  | 2.186366 | Stalled      | chr11:59019862-59024236   | 2.375   |
| <b>Rpl18</b>         | 181 | 0   | 3.016811 | 314  | 5.233333 | 293.404  | 3.182274 | Stalled      | chr7:52971440-52976205    | 2.766   |
| <b>Car15</b>         | 181 | 0   | 3.016811 | 20   | 0.333333 | 0.695909 | 2.617744 | Stalled      | chr16:17835368-17840279   | 2.912   |
| <b>Ubc</b>           | 181 | 79  | 3.016811 | 230  | 3.833333 | 0        | 6.237627 | Stalled      | chr5:125866334-125872387  | 4.054   |
| <b>Angptl6</b>       | 181 | 0   | 3.016811 | 327  | 5.45     | 3.6824   | 0.162496 | Stalled      | chr9:20678252-20686154    | 5.903   |
| <b>Rasgrp2</b>       | 181 | 0   | 3.016811 | 366  | 6.1      | 21.8416  | 2.621874 | Elongating   | chr19:6398582-6415216     | 14.635  |
| <b>Sypl</b>          | 181 | 0   | 3.016811 | 771  | 12.85    | 31.4076  | 9.507996 | Stalled      | chr12:33636809-33664367   | 25.559  |
| <b>Lats2</b>         | 181 | 0   | 3.016811 | 350  | 5.833333 | 3.86802  | 19.1505  | Stalled      | chr14:58308498-58366960   | 56.463  |
| <b>Far1</b>          | 181 | 0   | 3.016811 | 518  | 8.633333 | 13.9437  | 34.40962 | Stalled      | chr7:120655375-120713972  | 56.598  |
| <b>Eaf2</b>          | 181 | 0   | 3.016811 | 615  | 10.25    | 19.629   | 23.61057 | Stalled      | chr16:36792969-36876912   | 81.944  |
| <b>Prdm2</b>         | 181 | 0   | 3.016811 | 1787 | 29.78333 | 8.48499  | 10.03853 | Stalled      | chr4:142697294-142804612  | 105.319 |
| <b>Cast</b>          | 181 | 0   | 3.016811 | 472  | 7.866667 | 6.04684  | 18.4955  | Stalled      | chr13:74831733-74947369   | 113.637 |
| <b>Galnt10</b>       | 181 | 0   | 3.016811 | 565  | 9.416667 | 2.52705  | 24.17395 | Stalled      | chr11:57456943-57601002   | 142.06  |
| <b>Psmb8</b>         | 180 | 0   | 3.000144 | 157  | 2.616667 | 260.497  | 6.161421 | Stalled      | chr17:34333139-34338399   | 3.261   |
| <b>B2m</b>           | 180 | 0   | 3.000144 | 823  | 13.71667 | 749.696  | 2.85907  | Stalled      | chr2:121971422-121978818  | 5.397   |
| <b>Btg1</b>          | 180 | 0   | 3.000144 | 205  | 3.416667 | 20.6085  | 10.61451 | Stalled      | chr10:96077634-96085443   | 5.81    |
| <b>Mrm1</b>          | 180 | 0   | 3.000144 | 154  | 2.566667 | 10.5995  | 15.43157 | Stalled      | chr11:84626562-84635017   | 6.456   |
| <b>Tob2</b>          | 180 | 0   | 3.000144 | 241  | 4.016667 | 19.6979  | 17.38733 | Stalled      | chr15:81678699-81690756   | 10.058  |
| <b>Slc19a1</b>       | 180 | 0   | 3.000144 | 629  | 10.48333 | 7.73835  | 5.137638 | Stalled      | chr10:76494003-76513171   | 17.169  |
| <b>Cpd</b>           | 180 | 0   | 3.000144 | 116  | 1.933333 | 0.622977 | 1.116903 | Unclassified | chr11:76590709-76662510   | 69.802  |
| <b>Gadd45a</b>       | 179 | 0   | 2.983476 | 24   | 0.4      | 13.3905  | 14.93873 | Stalled      | chr6:66985089-66989401    | 2.313   |
| <b>Bhlhe41</b>       | 179 | 0   | 2.983476 | 141  | 2.35     | 21.9844  | 1.204271 | Elongating   | chr6:145811256-145815860  | 2.605   |
| <b>Hirip3</b>        | 179 | 0   | 2.983476 | 160  | 2.666667 | 40.4763  | 4.16725  | Stalled      | chr7:134003485-134008636  | 3.152   |
| <b>Ctla4</b>         | 179 | 123 | 2.983476 | 58   | 0.966667 | 4.07447  | 2.366229 | Elongating   | chr1:60963868-60972674    | 6.807   |
| <b>Mrps23</b>        | 179 | 0   | 2.983476 | 134  | 2.233333 | 30.9047  | 14.95674 | Stalled      | chr11:88015919-88025009   | 7.091   |
| <b>Dcaf11</b>        | 179 | 0   | 2.983476 | 144  | 2.4      | 16.0534  | 20.13222 | Stalled      | chr14:56176868-56188902   | 10.035  |
| <b>Rpa2</b>          | 179 | 0   | 2.983476 | 510  | 8.5      | 31.6766  | 3.795775 | Stalled      | chr4:132322274-132334661  | 10.388  |
| <b>Milt6</b>         | 179 | 0   | 2.983476 | 662  | 11.03333 | 13.3062  | 2.372741 | Elongating   | chr11:97522725-97546772   | 22.048  |
| <b>Cct3</b>          | 179 | 0   | 2.983476 | 496  | 8.266667 | 71.9568  | 23.51325 | Stalled      | chr3:88099056-88125688    | 24.633  |
| <b>4933424B01Rik</b> | 179 | 0   | 2.983476 | 192  | 3.2      | 14.1965  | 76.82259 | Stalled      | chr6:146498153-146528357  | 28.205  |
| <b>Pdcd11</b>        | 179 | 0   | 2.983476 | 923  | 15.38333 | 18.5313  | 14.4449  | Stalled      | chr19:47163255-47205635   | 40.381  |
| <b>Ccdc64</b>        | 179 | 0   | 2.983476 | 370  | 6.166667 | 2.92531  | 1.440807 | Unclassified | chr5:116099294-116183568  | 82.275  |



|                      |     |     |          |      |          |          |          |              |                           |         |
|----------------------|-----|-----|----------|------|----------|----------|----------|--------------|---------------------------|---------|
| <b>Lrrc16a</b>       | 179 | 0   | 2.983476 | 1072 | 17.86667 | 1.84838  | 20.9566  | Stalled      | chr13:24104352-24374659   | 268.308 |
| <b>Adrb2</b>         | 178 | 0   | 2.966809 | 12   | 0.2      | 15.5505  | 24.91213 | Stalled      | chr18:62337469-62341613   | 2.145   |
| <b>mmu-mir-150</b>   | 178 | 0   | 2.966809 | 517  | 8.616667 | ND       | ND       | Stalled      | chr7:52374928-52377122    | 2.195   |
| <b>Tmed1</b>         | 178 | 0   | 2.966809 | 137  | 2.283333 | 11.6592  | 3.13907  | Stalled      | chr9:21311823-21316630    | 2.808   |
| <b>Abhd11</b>        | 178 | 0   | 2.966809 | 22   | 0.366667 | 19.7238  | 33.10878 | Stalled      | chr5:135483168-135488040  | 2.873   |
| <b>Ttc32</b>         | 178 | 0   | 2.966809 | 45   | 0.75     | 5.67011  | 38.24368 | Stalled      | chr12:9034802-9043200     | 6.399   |
| <b>Klf16</b>         | 178 | 0   | 2.966809 | 354  | 5.9      | 9.56217  | 6.165556 | Stalled      | chr10:80029865-80042041   | 10.177  |
| <b>Xab2</b>          | 178 | 0   | 2.966809 | 439  | 7.316667 | 25.5764  | 3.954052 | Stalled      | chr8:3610089-3623296      | 11.208  |
| <b>Gys1</b>          | 178 | 0   | 2.966809 | 199  | 3.316667 | 6.82278  | 14.46601 | Stalled      | chr7:52688208-52711987    | 21.78   |
| <b>Thra</b>          | 178 | 0   | 2.966809 | 138  | 2.3      | 2.39078  | 3.608587 | Stalled      | chr11:98601186-98626425   | 23.24   |
| <b>Mrps34</b>        | 177 | 0   | 2.950141 | 13   | 0.216667 | 44.0777  | 4.665906 | Unclassified | chr17:25030064-25033218   | 1.155   |
| <b>2310035K24Rik</b> | 177 | 0   | 2.950141 | 18   | 0.3      | 9.46631  | 13.44292 | Stalled      | chr2:131034175-131039250  | 3.076   |
| <b>Unc50</b>         | 177 | 0   | 2.950141 | 171  | 2.85     | 13.5034  | 11.91184 | Stalled      | chr1:37485016-37495969    | 8.954   |
| <b>Keap1</b>         | 177 | 0   | 2.950141 | 343  | 5.716667 | 28.6971  | 3.548253 | Stalled      | chr9:21034173-21045776    | 9.604   |
| <b>Ankrd16</b>       | 177 | 0   | 2.950141 | 90   | 1.5      | 17.0899  | 21.98494 | Stalled      | chr2:11697379-11711948    | 12.57   |
| <b>Tacc3</b>         | 177 | 0   | 2.950141 | 241  | 4.016667 | 27.683   | 27.43442 | Stalled      | chr5:33998795-34014846    | 14.052  |
| <b>C87436</b>        | 177 | 0   | 2.950141 | 235  | 3.916667 | 7.78362  | 49.39549 | Stalled      | chr6:86386639-86420379    | 31.741  |
| <b>Rbm39</b>         | 177 | 0   | 2.950141 | 1598 | 26.63333 | 49.4046  | 11.64279 | Stalled      | chr2:155972974-156007976  | 33.003  |
| <b>Egln1</b>         | 177 | 0   | 2.950141 | 351  | 5.85     | 16.5814  | 9.951038 | Stalled      | chr8:127432486-127475154  | 40.669  |
| <b>Il2ra</b>         | 177 | 132 | 2.950141 | 682  | 11.36667 | 2.69753  | 3.715004 | Stalled      | chr2:11562418-11614820    | 50.403  |
| <b>S1pr4</b>         | 176 | 0   | 2.933474 | 93   | 1.55     | 42.1926  | 0.64222  | Elongating   | chr10:80961222-80964882   | 1.661   |
| <b>Sepw1</b>         | 176 | 0   | 2.933474 | 478  | 7.966667 | 276.83   | 4.491823 | Stalled      | chr7:16502556-16509720    | 5.165   |
| <b>Peo1</b>          | 176 | 0   | 2.933474 | 91   | 1.516667 | 9.25777  | 17.80319 | Stalled      | chr19:45079047-45087252   | 6.206   |
| <b>Vps18</b>         | 176 | 0   | 2.933474 | 142  | 2.366667 | 11.7895  | 8.324909 | Stalled      | chr2:119112477-119124189  | 9.713   |
| <b>Mta2</b>          | 176 | 0   | 2.933474 | 456  | 7.6      | 61.7492  | 10.24117 | Stalled      | chr19:9014409-9026790     | 10.382  |
| <b>Hook2</b>         | 176 | 0   | 2.933474 | 82   | 1.366667 | 4.58821  | 14.1848  | Stalled      | chr8:87512493-87527263    | 12.771  |
| <b>Itfg2</b>         | 176 | 0   | 2.933474 | 182  | 3.033333 | 10.4226  | 27.61518 | Stalled      | chr6:128359461-128376928  | 15.468  |
| <b>Numb1</b>         | 176 | 0   | 2.933474 | 87   | 1.45     | 1.14866  | 12.07658 | Stalled      | chr7:28041779-28067169    | 23.391  |
| <b>2610109H07Rik</b> | 176 | 0   | 2.933474 | 65   | 1.083333 | 0.155305 | 1.623798 | Unclassified | chr4:147472546-147506807  | 32.262  |
| <b>Esy2</b>          | 176 | 0   | 2.933474 | 277  | 4.616667 | 3.84793  | 91.4022  | Stalled      | chr12:117517694-117611571 | 91.878  |
| <b>4931428F04Rik</b> | 175 | 0   | 2.916806 | 55   | 0.916667 | 2.85697  | 24.31369 | Stalled      | chr8:107804309-107815428  | 9.12    |
| <b>C1nc</b>          | 175 | 0   | 2.916806 | 141  | 2.35     | 2.6519   | 6.77761  | Stalled      | chr9:62684593-62699809    | 13.217  |
| <b>Gl25d1</b>        | 175 | 0   | 2.916806 | 265  | 4.416667 | 19.4492  | 8.673402 | Stalled      | chr8:74132922-74148810    | 13.889  |
| <b>Op3</b>           | 175 | 0   | 2.916806 | 252  | 4.2      | 9.42675  | 25.10055 | Stalled      | chr7:19811737-19832166    | 18.43   |
| <b>Gm10653</b>       | 175 | 0   | 2.916806 | 175  | 2.916667 | 0        | 0        | Stalled      | chr9:62689283-62711831    | 20.549  |
| <b>Sirt2</b>         | 175 | 0   | 2.916806 | 194  | 3.233333 | 16.1317  | 14.59763 | Stalled      | chr7:29549770-29573684    | 21.915  |
| <b>Mapkapk3</b>      | 175 | 0   | 2.916806 | 488  | 8.133333 | 13.9704  | 7.610631 | Stalled      | chr9:107157257-107194208  | 34.952  |
| <b>Zc3h7a</b>        | 175 | 33  | 2.916806 | 804  | 13.4     | 16.0981  | 18.23066 | Stalled      | chr16:11136687-11178486   | 39.8    |
| <b>H1f0</b>          | 174 | 84  | 2.900139 | 145  | 2.416667 | 24.6163  | 2.618976 | Stalled      | chr15:78856641-78860930   | 2.29    |
| <b>Rps9</b>          | 174 | 0   | 2.900139 | 471  | 7.85     | 1229.03  | 2.40866  | Stalled      | chr7:3653642-3658499      | 2.858   |
| <b>Tuba4a</b>        | 174 | 0   | 2.900139 | 193  | 3.216667 | 34.2446  | 5.499508 | Stalled      | chr1:75211548-75217828    | 4.281   |
| <b>Il17re</b>        | 174 | 0   | 2.900139 | 24   | 0.4      | 0.506666 | 1.917094 | Unclassified | chr6:113406477-113420745  | 12.269  |
| <b>Lrrc68</b>        | 174 | 0   | 2.900139 | 601  | 10.01667 | 12.9708  | 6.16918  | Stalled      | chr7:20116315-20149747    | 31.433  |
| <b>Rft1</b>          | 174 | 0   | 2.900139 | 389  | 6.483333 | 3.55017  | 20.12924 | Stalled      | chr14:31465560-31504499   | 36.94   |
| <b>Cd47</b>          | 174 | 39  | 2.900139 | 1288 | 21.46667 | 31.7862  | 23.11003 | Stalled      | chr16:49853766-49911796   | 56.031  |
| <b>Cdh17</b>         | 174 | 64  | 2.900139 | 211  | 3.516667 | 2.45422  | 2.177943 | Unclassified | chr4:11683303-11745052    | 59.75   |
| <b>Ppfbp2</b>        | 174 | 0   | 2.900139 | 431  | 7.183333 | 3.7863   | 8.471031 | Stalled      | chr7:114736564-114888408  | 149.845 |
| <b>Hlcs</b>          | 174 | 0   | 2.900139 | 788  | 13.13333 | 1.36282  | 0.499876 | Stalled      | chr16:94350911-94511463   | 158.553 |
| <b>Ier2</b>          | 173 | 20  | 2.883471 | 177  | 2.95     | 44.9437  | 1.325744 | Unclassified | chr8:87185229-87188751    | 1.523   |
| <b>Tmem107</b>       | 173 | 0   | 2.883471 | 16   | 0.266667 | 9.49117  | 21.48727 | Stalled      | chr11:68882310-68886794   | 2.485   |
| <b>9030607L17Rik</b> | 173 | 0   | 2.883471 | 72   | 1.2      | 13.0179  | 2.822502 | Stalled      | chr10:80163437-80168127   | 2.691   |
| <b>Fabp5</b>         | 173 | 0   | 2.883471 | 117  | 1.95     | 24.387   | 6.387431 | Stalled      | chr3:10010605-10016610    | 4.006   |
| <b>Giyd2</b>         | 173 | 0   | 2.883471 | 40   | 0.666667 | 9.11628  | 30.68073 | Stalled      | chr7:133834649-133841297  | 4.649   |
| <b>Asb6</b>          | 173 | 0   | 2.883471 | 447  | 7.45     | 16.666   | 1.965949 | Elongating   | chr2:30678617-30685820    | 5.204   |
| <b>Kctd12</b>        | 173 | 0   | 2.883471 | 117  | 1.95     | 10.4724  | 16.24421 | Stalled      | chr14:103375797-103383854 | 6.058   |
| <b>Trim65</b>        | 173 | 0   | 2.883471 | 112  | 1.866667 | 5.50161  | 13.57555 | Stalled      | chr11:115986021-115994442 | 6.422   |
| <b>Amz2</b>          | 173 | 0   | 2.883471 | 89   | 1.483333 | 2.33427  | 15.31823 | Stalled      | chr11:109285259-109299462 | 12.204  |
| <b>B3gnt5</b>        | 173 | 0   | 2.883471 | 265  | 4.416667 | 7.18167  | 3.166472 | Stalled      | chr16:19758326-19772846   | 12.521  |
| <b>Itgb1bp1</b>      | 173 | 0   | 2.883471 | 110  | 1.833333 | 10.688   | 26.33009 | Stalled      | chr12:21275666-21294098   | 16.433  |
| <b>Dhb</b>           | 173 | 0   | 2.883471 | 44   | 0.733333 | 0        | 1.65067  | Unclassified | chr2:27019026-27038724    | 17.699  |
| <b>Fam73b</b>        | 173 | 0   | 2.883471 | 136  | 2.266667 | 4.5144   | 9.434764 | Stalled      | chr2:30217854-30241039    | 21.186  |
| <b>Nat10</b>         | 173 | 0   | 2.883471 | 737  | 12.28333 | 15.9288  | 18.69269 | Stalled      | chr2:103561415-103603407  | 39.993  |
| <b>Pycard</b>        | 172 | 0   | 2.866804 | 197  | 3.283333 | 19.9752  | 1.371675 | Elongating   | chr7:135134886-135139381  | 2.496   |
| <b>Dpp7</b>          | 172 | 0   | 2.866804 | 167  | 2.783333 | 5.06307  | 0.912964 | Elongating   | chr2:25207809-25213852    | 4.044   |
| <b>Nfkbid</b>        | 172 | 0   | 2.866804 | 390  | 6.5      | 8.21743  | 1.633641 | Elongating   | chr7:31206322-31213765    | 5.444   |
| <b>Coro6</b>         | 172 | 0   | 2.866804 | 35   | 0.583333 | 0.135766 | 0.347815 | Unclassified | chr11:77275414-77283003   | 5.59    |
| <b>Sema6c</b>        | 172 | 0   | 2.866804 | 25   | 0.416667 | 0.139749 | 0.723409 | Unclassified | chr3:94966295-94977238    | 8.944   |
| <b>Cdc25b</b>        | 172 | 0   | 2.866804 | 295  | 4.916667 | 37.3627  | 7.076924 | Stalled      | chr2:131010686-131024233  | 11.548  |
| <b>Cic</b>           | 172 | 0   | 2.866804 | 454  | 7.566667 | 22.5494  | 7.833547 | Stalled      | chr7:26065197-26079167    | 11.971  |
| <b>Il27ra</b>        | 172 | 0   | 2.866804 | 146  | 2.433333 | 7.00553  | 7.537335 | Stalled      | chr8:86554184-86568474    | 12.291  |
| <b>Txn1</b>          | 172 | 0   | 2.866804 | 588  | 9.8      | 131.408  | 11.13626 | Stalled      | chr4:57956244-57971283    | 13.04   |
| <b>Akap8</b>         | 172 | 0   | 2.866804 | 660  | 11       | 28.096   | 13.2031  | Stalled      | chr17:32440620-32460098   | 17.479  |
| <b>Ethe1</b>         | 172 | 0   | 2.866804 | 241  | 4.016667 | 9.2731   | 1.247758 | Stalled      | chr7:25370561-25393944    | 21.384  |
| <b>Poir2a</b>        | 172 | 68  | 2.866804 | 719  | 11.98333 | 26.6107  | 19.16077 | Stalled      | chr11:69547911-69573725   | 23.815  |
| <b>Kcp</b>           | 172 | 0   | 2.866804 | 68   | 1.133333 | 0.365957 | 0.53606  | Unclassified | chr6:29432035-29459934    | 25.9    |
| <b>Pcid2</b>         | 172 | 0   | 2.866804 | 448  | 7.466667 | 9.73836  | 23.49758 | Stalled      | chr8:13077524-13107343    | 27.82   |
| <b>Parp1</b>         | 172 | 0   | 2.866804 | 942  | 15.7     | 66.8988  | 6.17083  | Stalled      | chr1:182497105-182531385  | 32.281  |
| <b>St14</b>          | 172 | 0   | 2.866804 | 304  | 5.066667 | 7.47371  | 4.633065 | Stalled      | chr9:30896174-30941384    | 43.211  |
| <b>Aldoa</b>         | 171 | 0   | 2.850137 | 184  | 3.066667 | 579.936  | 7.71366  | Stalled      | chr7:133938749-133944697  | 3.949   |
| <b>Efcab4a</b>       | 171 | 0   | 2.850137 | 21   | 0.35     | 0.159539 | 4.773422 | Stalled      | chr7:148644992-148652501  | 5.51    |
| <b>Fes</b>           | 171 | 0   | 2.850137 | 65   | 1.083333 | 1.93936  | 3.840005 | Stalled      | chr7:87522643-87534832    | 10.19   |
| <b>Ptpn7</b>         | 171 | 0   | 2.850137 | 441  | 7.35     | 17.9425  | 6.533925 | Stalled      | chr1:137027301-137041897  | 12.597  |
| <b>Stip1</b>         | 171 | 0   | 2.850137 | 618  | 10.3     | 89.2045  | 8.066481 | Stalled      | chr19:7095185-7116516     | 19.332  |
| <b>Trim25</b>        | 171 | 0   | 2.850137 | 1130 | 18.83333 | 29.52    | 6.244945 | Stalled      | chr11:88858716-88881607   | 20.892  |
| <b>Fam192a</b>       | 171 | 0   | 2.850137 | 330  | 5.5      | 15.6665  | 16.01781 | Stalled      | chr8:97098840-97127626    | 26.787  |
| <b>Pde4dip</b>       | 171 | 0   | 2.850137 | 135  | 2.25     | 8.9054   | 23.65335 | Stalled      | chr3:97542766-97573937    | 29.172  |

|                      |     |    |          |      |          |          |          |              |                           |         |
|----------------------|-----|----|----------|------|----------|----------|----------|--------------|---------------------------|---------|
| <b>Dhtkd1</b>        | 171 | 0  | 2.850137 | 93   | 1.55     | 0.590965 | 5.117557 | Unclassified | chr2:5819105-5865838      | 44.734  |
| <b>BC016423</b>      | 171 | 0  | 2.850137 | 776  | 12.93333 | 3.70163  | 17.19843 | Stalled      | chr13:3565280-3612354     | 45.075  |
| <b>Cd86</b>          | 171 | 0  | 2.850137 | 1380 | 23       | 15.7724  | 6.370689 | Stalled      | chr16:36603954-36668163   | 62.21   |
| <b>Ptdss1</b>        | 171 | 0  | 2.850137 | 377  | 6.283333 | 14.9726  | 36.26604 | Stalled      | chr13:67031765-67099337   | 65.573  |
| <b>Ephb2</b>         | 171 | 0  | 2.850137 | 361  | 6.016667 | 0.099247 | 2.34045  | Unclassified | chr4:136209524-136393850  | 182.327 |
| <b>1500012F01Rik</b> | 170 | 0  | 2.833469 | 643  | 10.71667 | 91.7666  | 2.028964 | Stalled      | chr2:166886433-166891362  | 2.93    |
| <b>Dusp6</b>         | 170 | 0  | 2.833469 | 25   | 0.416667 | 12.3647  | 20.87402 | Stalled      | chr10:98723864-98730122   | 4.259   |
| <b>Psmc5</b>         | 170 | 0  | 2.833469 | 329  | 5.483333 | 101.611  | 5.222166 | Stalled      | chr11:106115498-106124426 | 6.929   |
| <b>Epm2aip1</b>      | 170 | 0  | 2.833469 | 87   | 1.45     | 7.87258  | 33.36805 | Stalled      | chr9:111172348-111181595  | 7.248   |
| <b>Zfp740</b>        | 170 | 0  | 2.833469 | 123  | 2.05     | 12.3617  | 1.763593 | Elongating   | chr15:102036697-102046032 | 7.336   |
| <b>Nagk</b>          | 170 | 55 | 2.833469 | 96   | 1.6      | 7.86859  | 22.5122  | Stalled      | chr6:83743050-83752549    | 7.5     |
| <b>Map2k7</b>        | 170 | 0  | 2.833469 | 228  | 3.8      | 20.24    | 11.3652  | Stalled      | chr8:4236739-4247896      | 9.158   |
| <b>Coq6</b>          | 170 | 0  | 2.833469 | 110  | 1.833333 | 14.2739  | 15.77489 | Stalled      | chr12:85700917-85714746   | 11.83   |
| <b>Mttr4</b>         | 170 | 0  | 2.833469 | 502  | 8.366667 | 10.0721  | 14.37395 | Stalled      | chr11:87403718-87429798   | 24.081  |
| <b>D2hgdh</b>        | 170 | 0  | 2.833469 | 54   | 0.9      | 2.20963  | 128.486  | Stalled      | chr1:95719816-95748751    | 26.936  |
| <b>Txnrd1</b>        | 170 | 0  | 2.833469 | 1823 | 30.38333 | 24.9861  | 6.775912 | Stalled      | chr10:82319950-82360469   | 38.52   |
| <b>Gmcl1</b>         | 170 | 0  | 2.833469 | 134  | 2.233333 | 6.64143  | 63.03033 | Stalled      | chr6:86641761-86685372    | 41.612  |
| <b>2610101N10Rik</b> | 170 | 0  | 2.833469 | 482  | 8.033333 | 5.61187  | 30.78082 | Stalled      | chr9:95357312-95414415    | 55.104  |
| <b>Mobkl2b</b>       | 170 | 0  | 2.833469 | 1892 | 31.53333 | 4.12324  | 11.08383 | Stalled      | chr4:34899952-35106715    | 204.764 |
| <b>Tubb2c</b>        | 169 | 0  | 2.816802 | 71   | 1.183333 | 103.091  | 12.23933 | Stalled      | chr2:25077681-25082161    | 2.481   |
| <b>Apoa4</b>         | 169 | 0  | 2.816802 | 4    | 0.066667 | 0.092315 | 0.863248 | Unclassified | chr9:46046926-46051541    | 2.616   |
| <b>Rimbp3</b>        | 169 | 0  | 2.816802 | 37   | 0.616667 | 1.87526  | 0.231738 | Unclassified | chr16:17206227-17214075   | 5.849   |
| <b>Ache</b>          | 169 | 0  | 2.816802 | 286  | 4.766667 | 5.06289  | 0.90865  | Elongating   | chr5:137727504-137735691  | 6.188   |
| <b>Zp1</b>           | 169 | 0  | 2.816802 | 32   | 0.533333 | 0.173194 | 0.568917 | Unclassified | chr19:10988786-10997091   | 6.306   |
| <b>Gcdh</b>          | 169 | 0  | 2.816802 | 63   | 1.05     | 10.0003  | 6.391624 | Stalled      | chr8:87410285-87419820    | 7.536   |
| <b>Trem12</b>        | 169 | 0  | 2.816802 | 929  | 15.48333 | 13.827   | 3.178614 | Stalled      | chr17:48437362-48451859   | 12.498  |
| <b>Sec61a1</b>       | 169 | 0  | 2.816802 | 746  | 12.43333 | 56.2584  | 9.411112 | Stalled      | chr6:88453600-88470794    | 15.195  |
| <b>Tpm4</b>          | 169 | 0  | 2.816802 | 1364 | 22.73333 | 76.5218  | 3.804765 | Stalled      | chr8:74657190-74677028    | 17.839  |
| <b>Ttyh3</b>         | 169 | 0  | 2.816802 | 435  | 7.25     | 16.9344  | 4.273759 | Stalled      | chr5:141096536-141126985  | 28.45   |
| <b>Kmo</b>           | 169 | 0  | 2.816802 | 513  | 8.55     | 9.41329  | 4.707015 | Stalled      | chr1:177560323-177590984  | 28.662  |
| <b>Atf6</b>          | 169 | 0  | 2.816802 | 2541 | 42.35    | 10.2969  | 11.34818 | Stalled      | chr1:172634587-172799902  | 163.316 |
| <b>Use1</b>          | 168 | 0  | 2.800134 | 56   | 0.933333 | 51.6286  | 9.389433 | Stalled      | chr8:73889115-73893631    | 2.517   |
| <b>Surf1</b>         | 168 | 0  | 2.800134 | 479  | 7.983333 | 80.3385  | 1.463893 | Elongating   | chr2:26768897-26774050    | 3.154   |
| <b>1810026J23Rik</b> | 168 | 0  | 2.800134 | 45   | 0.75     | 0        | 12.6376  | Stalled      | chr9:21395165-21400391    | 3.227   |
| <b>Mogs</b>          | 168 | 0  | 2.800134 | 155  | 2.583333 | 31.9709  | 6.160146 | Stalled      | chr6:83063499-83068892    | 3.394   |
| <b>Fam136a</b>       | 168 | 0  | 2.800134 | 88   | 1.466667 | 11.0315  | 11.08704 | Stalled      | chr6:86313676-86320052    | 4.377   |
| <b>Cxxc1</b>         | 168 | 0  | 2.800134 | 124  | 2.066667 | 31.1965  | 5.940225 | Stalled      | chr18:74373865-74381145   | 5.281   |
| <b>Bcl2l12</b>       | 168 | 0  | 2.800134 | 107  | 1.783333 | 18.9354  | 10.8726  | Stalled      | chr7:52246592-52254949    | 6.358   |
| <b>Eif2b5</b>        | 168 | 0  | 2.800134 | 194  | 3.233333 | 16.8459  | 9.579628 | Stalled      | chr16:20496889-20509398   | 10.51   |
| <b>Matn1</b>         | 168 | 0  | 2.800134 | 61   | 1.016667 | 0.25607  | 0.993783 | Unclassified | chr4:130498299-130511391  | 11.093  |
| <b>Fam86</b>         | 168 | 0  | 2.800134 | 347  | 5.783333 | 2.96318  | 5.223318 | Stalled      | chr16:5244247-5258049     | 11.803  |
| <b>5033414D02Rik</b> | 168 | 0  | 2.800134 | 116  | 1.933333 | 11.4164  | 5.80327  | Stalled      | chr19:29423166-29438361   | 13.196  |
| <b>2810006K23Rik</b> | 168 | 0  | 2.800134 | 88   | 1.466667 | 2.89464  | 70.9999  | Stalled      | chr5:124776097-124791847  | 13.751  |
| <b>Zbtb5</b>         | 168 | 0  | 2.800134 | 240  | 4        | 9.04709  | 14.49674 | Stalled      | chr4:45004116-45027284    | 21.169  |
| <b>2010002N04Rik</b> | 168 | 0  | 2.800134 | 275  | 4.583333 | 7.21949  | 7.635288 | Stalled      | chr18:60633844-60663637   | 27.794  |
| <b>Ndufs1</b>        | 168 | 0  | 2.800134 | 262  | 4.366667 | 17.817   | 36.80651 | Stalled      | chr1:63190166-63225396    | 33.231  |
| <b>Myst2</b>         | 168 | 0  | 2.800134 | 934  | 15.56667 | 15.9781  | 16.98615 | Stalled      | chr11:95135572-95173515   | 35.944  |
| <b>Iqce</b>          | 168 | 0  | 2.800134 | 216  | 3.6      | 2.47802  | 16.11226 | Stalled      | chr5:141139458-141180332  | 38.875  |
| <b>Pdcd10</b>        | 168 | 0  | 2.800134 | 315  | 5.25     | 3.90767  | 24.40912 | Stalled      | chr3:75320411-75362721    | 40.311  |
| <b>Brf1</b>          | 168 | 0  | 2.800134 | 846  | 14.1     | 14.8887  | 13.37695 | Stalled      | chr12:114198072-114240832 | 40.761  |
| <b>Actr3</b>         | 168 | 51 | 2.800134 | 1794 | 29.9     | 116.869  | 12.64173 | Stalled      | chr1:127289482-127334067  | 42.586  |
| <b>Mphosph9</b>      | 168 | 0  | 2.800134 | 654  | 10.9     | 3.06864  | 16.9639  | Stalled      | chr5:124700967-124780460  | 77.494  |
| <b>Pcbp3</b>         | 168 | 0  | 2.800134 | 365  | 6.083333 | 1.60851  | 21.5297  | Stalled      | chr10:76224598-76426692   | 200.095 |
| <b>Hist1h4a</b>      | 167 | 48 | 2.783467 | 0    | 0        | 0        | 408      | Unclassified | chr13:23852714-23855026   | 0.313   |
| <b>Mpeg1</b>         | 167 | 0  | 2.783467 | 59   | 0.983333 | 21.2816  | 1.234658 | Elongating   | chr19:12533268-12539775   | 4.508   |
| <b>Ppp4c</b>         | 167 | 0  | 2.783467 | 344  | 5.733333 | 70.5865  | 6.893923 | Stalled      | chr7:133929381-133937985  | 6.605   |
| <b>2310045N01Rik</b> | 167 | 0  | 2.783467 | 182  | 3.033333 | 29.7428  | 3.680684 | Stalled      | chr8:72661611-72671157    | 7.547   |
| <b>Slc25a22</b>      | 167 | 0  | 2.783467 | 295  | 4.916667 | 12.0655  | 4.277313 | Stalled      | chr7:148615650-148625517  | 7.868   |
| <b>A030048B08Rik</b> | 167 | 0  | 2.783467 | 192  | 3.2      | 5.86582  | 9.94621  | Stalled      | chr5:3583978-3589547      | 12.57   |
| <b>C430107D22Rik</b> | 167 | 0  | 2.783467 | 383  | 6.383333 | 51.3357  | 5.615013 | Stalled      | chr17:32527605-32542526   | 12.922  |
| <b>Ms4a15</b>        | 167 | 0  | 2.783467 | 71   | 1.183333 | 1.00629  | 0.32833  | Unclassified | chr19:11052796-11069740   | 14.945  |
| <b>Lsm11</b>         | 167 | 0  | 2.783467 | 153  | 2.55     | 3.2934   | 8.174544 | Stalled      | chr11:45741770-45760437   | 16.668  |
| <b>Usp52</b>         | 167 | 64 | 2.783467 | 206  | 3.433333 | 7.06653  | 30.05872 | Stalled      | chr10:127738390-127758403 | 18.014  |
| <b>Ppm1k</b>         | 167 | 0  | 2.783467 | 157  | 2.616667 | 2.72843  | 16.00725 | Stalled      | chr6:57456495-57487420    | 28.926  |
| <b>Atad2</b>         | 167 | 0  | 2.783467 | 495  | 8.25     | 8.79061  | 28.21104 | Stalled      | chr15:57925601-57968637   | 41.037  |
| <b>Pex1</b>          | 167 | 0  | 2.783467 | 176  | 2.933333 | 2.37448  | 34.09975 | Stalled      | chr5:3594065-3637101      | 41.037  |
| <b>Hk1</b>           | 167 | 0  | 2.783467 | 558  | 9.3      | 25.3925  | 32.89449 | Stalled      | chr10:61731602-61805169   | 17.568  |
| <b>Lnep</b>          | 167 | 46 | 2.783467 | 820  | 13.66667 | 4.21954  | 49.77851 | Stalled      | chr17:17664686-17763453   | 96.768  |
| <b>Ulk4</b>          | 167 | 0  | 2.783467 | 671  | 11.18333 | 0.575414 | 14.59119 | Stalled      | chr9:120873573-121188290  | 312.718 |
| <b>Thtpa</b>         | 166 | 0  | 2.766799 | 101  | 1.683333 | 5.04005  | 3.749205 | Stalled      | chr14:55711671-55717819   | 4.149   |
| <b>Atp5b</b>         | 166 | 0  | 2.766799 | 303  | 5.05     | 425.527  | 7.14413  | Stalled      | chr10:127518362-127527444 | 7.083   |
| <b>Osr2</b>          | 166 | 0  | 2.766799 | 24   | 0.4      | 0.329777 | 0.410333 | Unclassified | chr15:35223866-35233060   | 7.195   |
| <b>Fam72a</b>        | 166 | 0  | 2.766799 | 114  | 1.9      | 9.98939  | 37.2174  | Stalled      | chr1:133422565-133436449  | 11.885  |
| <b>Pik3ip1</b>       | 166 | 0  | 2.766799 | 727  | 12.11667 | 13.329   | 0.700491 | Stalled      | chr11:3228733-3242974     | 12.242  |
| <b>Psat1</b>         | 166 | 0  | 2.766799 | 445  | 7.416667 | 45.8734  | 14.17446 | Stalled      | chr19:15979621-16001515   | 19.895  |
| <b>Cse1l</b>         | 166 | 0  | 2.766799 | 1157 | 19.28333 | 18.4622  | 18.03225 | Stalled      | chr2:166729595-166771887  | 40.293  |
| <b>Emid1</b>         | 166 | 0  | 2.766799 | 248  | 4.133333 | 1.12671  | 4.296944 | Stalled      | chr11:5006268-5054225     | 45.958  |
| <b>Kif9</b>          | 166 | 0  | 2.766799 | 121  | 2.016667 | 1.74525  | 39.85873 | Stalled      | chr9:110377461-110427678  | 48.218  |
| <b>Bola2</b>         | 165 | 0  | 2.750132 | 0    | 0        | 148.815  | 315      | Unclassified | chr7:133837513-133840207  | 0.695   |
| <b>Rnasek</b>        | 165 | 0  | 2.750132 | 65   | 1.083333 | 53.2004  | 0.703083 | Elongating   | chr11:70051627-70055348   | 1.722   |
| <b>Rilp</b>          | 165 | 0  | 2.750132 | 29   | 0.483333 | 0.973937 | 8.810195 | Stalled      | chr11:75321595-75326668   | 3.074   |
| <b>Lrrc25</b>        | 165 | 0  | 2.750132 | 139  | 2.316667 | 10.5994  | 0.762549 | Elongating   | chr8:73138742-73144749    | 4.008   |
| <b>Uap11</b>         | 165 | 0  | 2.750132 | 55   | 0.916667 | 12.7609  | 6.580983 | Stalled      | chr2:25217011-25223146    | 4.136   |
| <b>Fbxw5</b>         | 165 | 0  | 2.750132 | 74   | 1.233333 | 13.583   | 12.6471  | Stalled      | chr2:25354297-25360990    | 4.694   |
| <b>Fen1</b>          | 165 | 0  | 2.750132 | 235  | 3.916667 | 57.4301  | 5.865045 | Stalled      | chr19:10273628-10280433   | 4.806   |
| <b>Lymr5</b>         | 165 | 0  | 2.750132 | 84   | 1.4      | 5.77116  | 13.1815  | Stalled      | chr6:145157666-145165062  | 5.397   |

|                      |     |    |          |      |          |          |          |              |                           |         |
|----------------------|-----|----|----------|------|----------|----------|----------|--------------|---------------------------|---------|
| <b>Tcb</b>           | 165 | 0  | 2.750132 | 85   | 1.416667 | 39.6766  | 24.47661 | Stalled      | chr7:31009149-31019048    | 7.9     |
| <b>Ccdc94</b>        | 165 | 0  | 2.750132 | 232  | 3.866667 | 11.3627  | 8.356598 | Stalled      | chr17:56096609-56107374   | 8.766   |
| <b>Eif3k</b>         | 165 | 45 | 2.750132 | 383  | 6.383333 | 175.878  | 7.074255 | Stalled      | chr7:29756391-29768833    | 10.443  |
| <b>Vps52</b>         | 165 | 0  | 2.750132 | 219  | 3.65     | 16.6475  | 19.79532 | Stalled      | chr17:34090826-34103433   | 10.608  |
| <b>H2-Eb2</b>        | 165 | 84 | 2.750132 | 361  | 6.016667 | 15.5888  | 7.273078 | Stalled      | chr17:34460619-34477171   | 14.553  |
| <b>Mlf1ip</b>        | 165 | 0  | 2.750132 | 332  | 5.533333 | 2.13221  | 14.86657 | Stalled      | chr8:47635422-47664938    | 27.517  |
| <b>Rpgrip1</b>       | 165 | 0  | 2.750132 | 641  | 10.68333 | 1.96841  | 0.143205 | Stalled      | chr14:52728577-52781013   | 50.437  |
| <b>Gm5134</b>        | 165 | 0  | 2.750132 | 211  | 3.516667 | 2.34946  | 10.20024 | Stalled      | chr10:75415258-75472334   | 55.077  |
| <b>Rbks</b>          | 165 | 0  | 2.750132 | 280  | 4.666667 | 5.81424  | 68.24376 | Stalled      | chr5:31926811-32001983    | 73.173  |
| <b>Aff1</b>          | 165 | 0  | 2.750132 | 1655 | 27.58333 | 6.43852  | 21.17189 | Stalled      | chr5:104181180-104284341  | 101.162 |
| <b>Tspan9</b>        | 165 | 0  | 2.750132 | 292  | 4.866667 | 0.146752 | 1.148696 | Unclassified | chr6:127911417-128095596  | 182.18  |
| <b>Rnf5</b>          | 164 | 0  | 2.733464 | 21   | 0.35     | 32.2047  | 4.887821 | Stalled      | chr17:34738043-34742506   | 2.464   |
| <b>Myf6</b>          | 164 | 0  | 2.733464 | 196  | 3.266667 | 68.5515  | 2.591991 | Stalled      | chr10:127927916-127932881 | 2.966   |
| <b>Ccdc28b</b>       | 164 | 0  | 2.733464 | 106  | 1.766667 | 28.415   | 3.913386 | Stalled      | chr4:129296517-129303152  | 4.636   |
| <b>Tex261</b>        | 164 | 0  | 2.733464 | 79   | 1.316667 | 23.4755  | 11.17984 | Stalled      | chr6:83720409-83727806    | 5.398   |
| <b>Slc25a45</b>      | 164 | 0  | 2.733464 | 71   | 1.183333 | 7.71081  | 4.240505 | Stalled      | chr19:5876465-5885768     | 7.304   |
| <b>D17Wsu104e</b>    | 164 | 0  | 2.733464 | 299  | 4.983333 | 62.454   | 6.143192 | Stalled      | chr17:56315963-56325343   | 7.381   |
| <b>Fbl</b>           | 164 | 0  | 2.733464 | 347  | 5.783333 | 99.3993  | 7.935107 | Stalled      | chr7:28952766-28964288    | 9.523   |
| <b>Puf60</b>         | 164 | 0  | 2.733464 | 602  | 10.03333 | 65.1308  | 9.065509 | Stalled      | chr15:75900613-75913376   | 10.764  |
| <b>Pex26</b>         | 164 | 0  | 2.733464 | 54   | 0.9      | 4.21757  | 15.47253 | Stalled      | chr6:121131684-121146203  | 12.52   |
| <b>1600014C10Rik</b> | 164 | 0  | 2.733464 | 291  | 4.85     | 5.45348  | 11.56923 | Stalled      | chr7:38966805-38982584    | 13.78   |
| <b>1700021C14Rik</b> | 164 | 0  | 2.733464 | 55   | 0.916667 | 6.04623  | 102.0194 | Stalled      | chr3:88086681-88102760    | 14.08   |
| <b>4933437F05Rik</b> | 164 | 0  | 2.733464 | 105  | 1.75     | 2.60477  | 1.085282 | Unclassified | chr12:88562072-88581551   | 17.48   |
| <b>Afg311</b>        | 164 | 0  | 2.733464 | 645  | 10.75    | 17.071   | 11.25513 | Stalled      | chr8:125999761-126027815  | 26.055  |
| <b>Ppp2r4</b>        | 164 | 0  | 2.733464 | 1078 | 17.96667 | 70.9314  | 8.572224 | Stalled      | chr2:30269569-30303327    | 31.759  |
| <b>Top3a</b>         | 164 | 0  | 2.733464 | 680  | 11.33333 | 8.84997  | 21.54227 | Stalled      | chr11:60553560-60592867   | 37.308  |
| <b>Pak4</b>          | 164 | 0  | 2.733464 | 369  | 6.15     | 4.54635  | 6.781168 | Stalled      | chr7:29343837-29385203    | 39.367  |
| <b>Arvcf</b>         | 164 | 0  | 2.733464 | 249  | 4.15     | 5.30439  | 1.884016 | Unclassified | chr16:18346366-18407167   | 58.802  |
| <b>Srcin1</b>        | 164 | 0  | 2.733464 | 241  | 4.016667 | 0.664022 | 0.211872 | Unclassified | chr11:97370653-97438440   | 65.788  |
| <b>Map2k1</b>        | 164 | 0  | 2.733464 | 690  | 11.5     | 38.234   | 24.18961 | Stalled      | chr9:64033599-64103412    | 67.814  |
| <b>Slc25a1</b>       | 163 | 0  | 2.716797 | 80   | 1.333333 | 48.461   | 8.10861  | Stalled      | chr16:17925304-17930312   | 3.009   |
| <b>Alpi</b>          | 163 | 0  | 2.716797 | 9    | 0.15     | 0.093309 | 0.448811 | Unclassified | chr1:88994578-89000181    | 3.604   |
| <b>Paqr6</b>         | 163 | 0  | 2.716797 | 23   | 0.383333 | 0.133096 | 5.463204 | Stalled      | chr3:88166510-88172463    | 3.954   |
| <b>Cabp4</b>         | 163 | 0  | 2.716797 | 119  | 1.983333 | 2.04976  | 0.156546 | Stalled      | chr19:4135422-4141609     | 4.188   |
| <b>Slc39a4</b>       | 163 | 0  | 2.716797 | 24   | 0.4      | 3.89755  | 28.93448 | Stalled      | chr15:76442812-76449282   | 4.471   |
| <b>Isl2</b>          | 163 | 0  | 2.716797 | 19   | 0.316667 | 1.05226  | 0.175025 | Unclassified | chr9:55386955-55393985    | 5.031   |
| <b>Zfp869</b>        | 163 | 0  | 2.716797 | 266  | 4.433333 | 6.01459  | 21.16121 | Stalled      | chr8:72229036-72242801    | 11.766  |
| <b>Map3k11</b>       | 163 | 0  | 2.716797 | 329  | 5.483333 | 17.8401  | 6.894158 | Stalled      | chr19:5687130-5702864     | 13.735  |
| <b>Nudt6</b>         | 163 | 0  | 2.716797 | 66   | 1.1      | 6.13249  | 62.56316 | Stalled      | chr3:37303905-37320512    | 14.608  |
| <b>Apc2</b>          | 163 | 0  | 2.716797 | 360  | 6        | 0.237287 | 0.08224  | Stalled      | chr10:79762564-79781001   | 16.438  |
| <b>Traf7</b>         | 163 | 0  | 2.716797 | 311  | 5.183333 | 23.8749  | 20.27868 | Stalled      | chr17:24645794-24666775   | 18.982  |
| <b>Brd9</b>          | 163 | 0  | 2.716797 | 312  | 5.2      | 14.7793  | 25.15867 | Stalled      | chr13:74073285-74098343   | 23.059  |
| <b>Zfp541</b>        | 163 | 0  | 2.716797 | 34   | 0.566667 | 0.747065 | 0.815083 | Unclassified | chr7:16655290-16681677    | 24.388  |
| <b>Ccrl2</b>         | 162 | 0  | 2.700129 | 23   | 0.383333 | 7.34189  | 2.763801 | Stalled      | chr9:110957338-110961774  | 2.437   |
| <b>Cd72</b>          | 162 | 0  | 2.700129 | 93   | 1.55     | 37.9695  | 7.760252 | Stalled      | chr4:43460595-43469498    | 6.904   |
| <b>Kptn</b>          | 162 | 0  | 2.700129 | 65   | 1.083333 | 14.798   | 11.49302 | Stalled      | chr7:16703224-16712863    | 7.64    |
| <b>Cog8</b>          | 162 | 0  | 2.700129 | 301  | 5.016667 | 20.7127  | 9.083336 | Stalled      | chr8:109572608-109582637  | 8.03    |
| <b>Gtpbp2</b>        | 162 | 0  | 2.700129 | 295  | 4.916667 | 26.6567  | 2.306037 | Elongating   | chr17:46295980-46306318   | 8.339   |
| <b>Prkcs</b>         | 162 | 0  | 2.700129 | 275  | 4.583333 | 55.7262  | 6.966801 | Stalled      | chr9:21805478-21818666    | 11.189  |
| <b>Aurka</b>         | 162 | 0  | 2.700129 | 317  | 5.283333 | 23.5124  | 10.51864 | Stalled      | chr2:172181695-172198006  | 14.312  |
| <b>Paics</b>         | 162 | 0  | 2.700129 | 302  | 5.033333 | 39.8808  | 27.85187 | Stalled      | chr5:77378435-77396531    | 16.097  |
| <b>Hexb</b>          | 162 | 40 | 2.700129 | 271  | 4.516667 | 18.0593  | 10.15251 | Stalled      | chr13:97946286-97970312   | 22.027  |
| <b>Riok1</b>         | 162 | 0  | 2.700129 | 396  | 6.6      | 14.4369  | 16.61498 | Stalled      | chr13:38127163-38153298   | 24.136  |
| <b>Nos2</b>          | 162 | 0  | 2.700129 | 106  | 1.766667 | 0.247333 | 0.795754 | Unclassified | chr11:78732360-78773626   | 39.267  |
| <b>Nab1</b>          | 162 | 0  | 2.700129 | 1641 | 27.35    | 21.6459  | 7.505639 | Stalled      | chr1:52512693-52559292    | 44.6    |
| <b>Smek2</b>         | 162 | 0  | 2.700129 | 658  | 10.96667 | 18.236   | 24.08109 | Stalled      | chr11:29070906-29120796   | 47.891  |
| <b>Asx1</b>          | 162 | 0  | 2.700129 | 1560 | 26       | 11.612   | 9.848411 | Stalled      | chr2:153169874-153229743  | 57.87   |
| <b>Sfxn5</b>         | 162 | 0  | 2.700129 | 402  | 6.7      | 1.27517  | 33.8857  | Stalled      | chr6:85163045-85285416    | 120.372 |
| <b>Sh3gl3</b>        | 162 | 0  | 2.700129 | 152  | 2.533333 | 0.052155 | 0.9415   | Unclassified | chr7:89317727-89459525    | 136.199 |
| <b>Rps21</b>         | 161 | 0  | 2.683462 | 4    | 0.066667 | 391.816  | 8.154659 | Unclassified | chr2:179990083-179993149  | 1.067   |
| <b>Ndufa6</b>        | 161 | 0  | 2.683462 | 130  | 2.166667 | 90.2571  | 7.816663 | Stalled      | chr15:82180568-82186721   | 4.154   |
| <b>Sfn2</b>          | 161 | 54 | 2.683462 | 501  | 8.35     | 59.4726  | 2.755792 | Stalled      | chr11:82876613-82884180   | 5.568   |
| <b>Spns1</b>         | 161 | 65 | 2.683462 | 84   | 1.4      | 16.7422  | 1.66415  | Elongating   | chr7:133513575-133523448  | 7.874   |
| <b>Pno1</b>          | 161 | 49 | 2.683462 | 169  | 2.816667 | 31.3431  | 10.76862 | Stalled      | chr11:17103202-17113592   | 8.391   |
| <b>Cdca8</b>         | 161 | 0  | 2.683462 | 297  | 4.95     | 49.8716  | 9.991032 | Stalled      | chr4:124595708-124616161  | 18.454  |
| <b>Tra2b</b>         | 161 | 0  | 2.683462 | 679  | 11.31667 | 28.6582  | 12.56081 | Stalled      | chr16:22245813-22268002   | 20.19   |
| <b>Atp13a2</b>       | 161 | 0  | 2.683462 | 455  | 7.583333 | 26.4976  | 3.549797 | Stalled      | chr4:140540787-140563616  | 20.83   |
| <b>Gfr1op2</b>       | 161 | 0  | 2.683462 | 231  | 3.85     | 17.9581  | 47.79791 | Stalled      | chr6:146524432-146547720  | 21.289  |
| <b>Wdr92</b>         | 161 | 49 | 2.683462 | 120  | 2        | 6.64254  | 41.54259 | Stalled      | chr11:17109895-17135203   | 23.309  |
| <b>Cnr2</b>          | 161 | 0  | 2.683462 | 509  | 8.483333 | 9.52416  | 4.781189 | Stalled      | chr4:135449318-135476125  | 24.808  |
| <b>Dhcr7</b>         | 161 | 54 | 2.683462 | 425  | 7.083333 | 19.9078  | 8.796837 | Stalled      | chr7:151007071-151034315  | 25.245  |
| <b>Fbxo31</b>        | 161 | 0  | 2.683462 | 295  | 4.916667 | 9.83458  | 9.660847 | Stalled      | chr8:124075878-124104706  | 26.829  |
| <b>Zfp64</b>         | 161 | 0  | 2.683462 | 473  | 7.883333 | 13.3079  | 11.87212 | Stalled      | chr2:168750860-168783087  | 30.228  |
| <b>Usp38</b>         | 161 | 0  | 2.683462 | 452  | 7.533333 | 12.9893  | 26.12016 | Stalled      | chr8:83504631-83540805    | 34.175  |
| <b>Fbxo18</b>        | 161 | 0  | 2.683462 | 122  | 2.033333 | 6.63328  | 37.44923 | Stalled      | chr2:11664199-11701154    | 34.956  |
| <b>Gmpr</b>          | 161 | 0  | 2.683462 | 193  | 3.216667 | 1.5828   | 2.462865 | Unclassified | chr13:45600837-45641750   | 38.914  |
| <b>Rbl1</b>          | 161 | 0  | 2.683462 | 721  | 12.01667 | 7.09324  | 37.23115 | Stalled      | chr2:156971638-157032270  | 58.633  |
| <b>Atp6v0a4</b>      | 161 | 55 | 2.683462 | 130  | 2.166667 | 0.230081 | 0.366178 | Unclassified | chr6:37998482-38076586    | 76.105  |
| <b>Vps53</b>         | 161 | 0  | 2.683462 | 1002 | 16.7     | 13.8478  | 25.67804 | Stalled      | chr11:75859727-75995132   | 133.406 |
| <b>Eif1ad</b>        | 160 | 0  | 2.666794 | 97   | 1.616667 | 23.607   | 16.35055 | Stalled      | chr19:5364812-5371511     | 4.7     |
| <b>Npas4</b>         | 160 | 0  | 2.666794 | 8    | 0.133333 | 0.031288 | 0.73197  | Unclassified | chr19:4984354-4991971     | 5.618   |
| <b>Cln5</b>          | 160 | 0  | 2.666794 | 135  | 2.25     | 10.2434  | 15.06274 | Stalled      | chr14:103467432-103476847 | 7.416   |
| <b>Mcmr8</b>         | 160 | 0  | 2.666794 | 532  | 8.866667 | 15.3766  | 5.659099 | Stalled      | chr11:60589026-60601789   | 10.764  |
| <b>Scm4</b>          | 160 | 0  | 2.666794 | 289  | 4.816667 | 38.5959  | 17.12928 | Stalled      | chr16:15623989-15639493   | 13.505  |
| <b>Triobp</b>        | 160 | 0  | 2.666794 | 578  | 9.633333 | 19.5471  | 7.20117  | Stalled      | chr15:78811485-78836299   | 22.815  |
| <b>Ppfia3</b>        | 160 | 0  | 2.666794 | 147  | 2.45     | 1.57738  | 9.589062 | Stalled      | chr7:52594495-52624389    | 27.895  |

|                      |     |     |          |      |          |          |          |              |                           |         |
|----------------------|-----|-----|----------|------|----------|----------|----------|--------------|---------------------------|---------|
| <b>Gorasp2</b>       | 160 | 0   | 2.666794 | 519  | 8.65     | 26.4799  | 15.77571 | Stalled      | chr2:70497565-70529782    | 30.218  |
| <b>Mastl</b>         | 160 | 0   | 2.666794 | 236  | 3.933333 | 3.9063   | 52.01253 | Stalled      | chr2:22972064-23013544    | 39.481  |
| <b>Aco1</b>          | 160 | 0   | 2.666794 | 278  | 4.633333 | 9.18988  | 44.91612 | Stalled      | chr4:40088297-40146042    | 55.746  |
| <b>Zfyve28</b>       | 160 | 0   | 2.666794 | 197  | 3.283333 | 0.52167  | 2.235496 | Unclassified | chr5:34537542-34632973    | 93.432  |
| <b>Frmvd5</b>        | 160 | 0   | 2.666794 | 431  | 7.183333 | 0.457641 | 3.013955 | Unclassified | chr2:121371264-121634793  | 261.53  |
| <b>Gps2</b>          | 159 | 0   | 2.650127 | 492  | 8.2      | 28.6184  | 1.195419 | Elongating   | chr11:69725693-69730093   | 2.401   |
| <b>Hist2h2be</b>     | 159 | 0   | 2.650127 | 18   | 0.3      | 8.19434  | 38.78536 | Stalled      | chr3:96023043-96027661    | 2.619   |
| <b>Zc3h10</b>        | 159 | 0   | 2.650127 | 108  | 1.8      | 11.8388  | 26.80851 | Stalled      | chr10:127980620-127986800 | 4.181   |
| <b>Rad23a</b>        | 159 | 0   | 2.650127 | 410  | 6.833333 | 23.9741  | 7.384435 | Stalled      | chr8:87358550-87366540    | 5.991   |
| <b>Exoc8</b>         | 159 | 0   | 2.650127 | 173  | 2.883333 | 4.12257  | 14.9299  | Stalled      | chr8:127414198-127423605  | 7.408   |
| <b>Obfc2b</b>        | 159 | 0   | 2.650127 | 72   | 1.2      | 27.5789  | 8.577459 | Stalled      | chr10:127838450-127848852 | 8.403   |
| <b>Ankrd13d</b>      | 159 | 0   | 2.650127 | 66   | 1.1      | 4.9675   | 18.40814 | Stalled      | chr19:4270179-4285137     | 12.959  |
| <b>Ptger2</b>        | 159 | 0   | 2.650127 | 114  | 1.9      | 4.28449  | 1.371538 | Stalled      | chr14:45605785-45623495   | 15.711  |
| <b>Ino80c</b>        | 159 | 0   | 2.650127 | 205  | 3.416667 | 11.7843  | 24.55569 | Stalled      | chr18:24263261-24282320   | 17.06   |
| <b>Got1</b>          | 159 | 0   | 2.650127 | 673  | 11.21667 | 25.4165  | 11.26199 | Stalled      | chr19:43574242-43601095   | 24.854  |
| <b>Fam118a</b>       | 159 | 0   | 2.650127 | 224  | 3.733333 | 3.6734   | 29.57011 | Stalled      | chr15:84865491-84893258   | 25.768  |
| <b>Ctbp1</b>         | 159 | 0   | 2.650127 | 840  | 14       | 70.7821  | 9.272042 | Stalled      | chr5:33590371-33619618    | 27.248  |
| <b>Traf3ip1</b>      | 159 | 0   | 2.650127 | 142  | 2.366667 | 4.9469   | 15.30622 | Stalled      | chr1:93389253-93424841    | 33.589  |
| <b>Cdkl4</b>         | 159 | 0   | 2.650127 | 135  | 2.25     | 0.153044 | 9.918089 | Stalled      | chr17:80922889-80965174   | 40.286  |
| <b>Crocc</b>         | 159 | 0   | 2.650127 | 269  | 4.483333 | 2.69546  | 33.01655 | Stalled      | chr4:140572552-140618460  | 43.909  |
| <b>B3galt2</b>       | 159 | 0   | 2.650127 | 305  | 5.083333 | 7.18139  | 43.47123 | Stalled      | chr13:14044940-14091335   | 44.396  |
| <b>Paxip1</b>        | 159 | 0   | 2.650127 | 868  | 14.46667 | 12.9861  | 22.73561 | Stalled      | chr5:28067204-28119879    | 50.676  |
| <b>Inpp5b</b>        | 159 | 0   | 2.650127 | 454  | 7.566667 | 6.22248  | 5.490222 | Stalled      | chr4:124417121-124478755  | 59.635  |
| <b>Gnaq</b>          | 159 | 0   | 2.650127 | 1708 | 28.46667 | 3.76291  | 11.37777 | Stalled      | chr19:16205320-16461943   | 254.624 |
| <b>Tusc4</b>         | 158 | 0   | 2.63346  | 28   | 0.466667 | 7.54871  | 11.38926 | Stalled      | chr9:107442539-107448037  | 3.499   |
| <b>Yod1</b>          | 158 | 0   | 2.63346  | 50   | 0.833333 | 2.89979  | 25.83756 | Stalled      | chr1:132611903-132618634  | 4.732   |
| <b>Pnpla2</b>        | 158 | 0   | 2.63346  | 84   | 1.4      | 13.2251  | 6.946882 | Stalled      | chr7:148639086-148646642  | 5.557   |
| <b>Daxx</b>          | 158 | 0   | 2.63346  | 185  | 3.083333 | 21.8965  | 7.8501   | Stalled      | chr17:34044442-34052534   | 6.093   |
| <b>9430023L20Rik</b> | 158 | 0   | 2.63346  | 60   | 1        | 21.1171  | 17.9434  | Stalled      | chr15:101112731-101121365 | 6.635   |
| <b>Hgfac</b>         | 158 | 0   | 2.63346  | 15   | 0.25     | 0.115792 | 1.127125 | Unclassified | chr5:35382201-35391085    | 6.885   |
| <b>3110040N11Rik</b> | 158 | 0   | 2.63346  | 51   | 0.85     | 10.6155  | 52.8645  | Stalled      | chr7:88927072-88936339    | 7.268   |
| <b>Actr5</b>         | 158 | 0   | 2.63346  | 249  | 4.15     | 11.8711  | 6.6931   | Stalled      | chr2:158448648-158464947  | 14.3    |
| <b>Mx1</b>           | 158 | 0   | 2.63346  | 347  | 5.783333 | 3.85095  | 4.767606 | Stalled      | chr16:97668641-97686613   | 15.873  |
| <b>Mterfd1</b>       | 158 | 0   | 2.63346  | 123  | 2.05     | 2.29071  | 48.48137 | Stalled      | chr13:67013033-67036008   | 20.976  |
| <b>Cad</b>           | 158 | 0   | 2.63346  | 701  | 11.68333 | 29.9672  | 9.585889 | Stalled      | chr5:31355183-31380852    | 23.67   |
| <b>Eif3b</b>         | 158 | 0   | 2.63346  | 1206 | 20.1     | 96.1288  | 5.852594 | Stalled      | chr5:140893258-140919312  | 24.055  |
| <b>Pcmt1</b>         | 158 | 0   | 2.63346  | 291  | 4.85     | 16.5545  | 41.71818 | Stalled      | chr10:7350034-7385382     | 33.349  |
| <b>Galm</b>          | 158 | 0   | 2.63346  | 117  | 1.95     | 0.867742 | 2.933039 | Unclassified | chr17:80524810-80584372   | 57.563  |
| <b>Adipor2</b>       | 158 | 0   | 2.63346  | 1079 | 17.98333 | 25.8003  | 0.609878 | Stalled      | chr6:119303167-119369501  | 64.335  |
| <b>Adcy3</b>         | 158 | 0   | 2.63346  | 494  | 8.233333 | 3.20994  | 23.6091  | Stalled      | chr12:4131396-4213524     | 80.129  |
| <b>Antxr2</b>        | 158 | 70  | 2.63346  | 271  | 4.516667 | 2.4802   | 43.97269 | Stalled      | chr5:98313706-98461981    | 146.276 |
| <b>Chst14</b>        | 157 | 0   | 2.616792 | 19   | 0.316667 | 7.14187  | 4.433536 | Stalled      | chr2:118750232-118754317  | 2.086   |
| <b>H3f3b</b>         | 157 | 126 | 2.616792 | 83   | 1.383333 | 150.583  | 12.48134 | Stalled      | chr11:115883274-115887818 | 2.545   |
| <b>Gabarap</b>       | 157 | 0   | 2.616792 | 29   | 0.483333 | 63.8212  | 16.99908 | Stalled      | chr11:69802871-69808451   | 3.581   |
| <b>Tmem186</b>       | 157 | 0   | 2.616792 | 120  | 2        | 7.73361  | 7.202095 | Stalled      | chr16:8633823-8639794     | 3.972   |
| <b>Nudt18</b>        | 157 | 0   | 2.616792 | 52   | 0.866667 | 4.87932  | 8.959624 | Stalled      | chr14:70975653-70982378   | 4.726   |
| <b>Calhm2</b>        | 157 | 0   | 2.616792 | 180  | 3        | 6.22295  | 1.915445 | Elongating   | chr19:47206721-47214784   | 6.064   |
| <b>Gpatch3</b>       | 157 | 0   | 2.616792 | 268  | 4.466667 | 13.7096  | 8.084069 | Stalled      | chr4:133128659-133140157  | 9.499   |
| <b>Th1l</b>          | 157 | 0   | 2.616792 | 735  | 12.25    | 23.3219  | 1.650127 | Elongating   | chr2:174239304-174253003  | 11.7    |
| <b>Unc119b</b>       | 157 | 0   | 2.616792 | 264  | 4.4      | 14.4841  | 1.905901 | Elongating   | chr5:115572574-115586984  | 12.411  |
| <b>Fam53c</b>        | 157 | 0   | 2.616792 | 202  | 3.366667 | 10.0628  | 2.567638 | Elongating   | chr18:34916559-34933414   | 14.856  |
| <b>Gm525</b>         | 157 | 0   | 2.616792 | 166  | 2.766667 | 0.528805 | 0.098928 | Stalled      | chr11:88933154-88954378   | 19.225  |
| <b>Suvp311</b>       | 157 | 0   | 2.616792 | 432  | 7.2      | 10.6989  | 12.62641 | Stalled      | chr10:61892125-61914441   | 20.317  |
| <b>Cntrob</b>        | 157 | 0   | 2.616792 | 364  | 6.066667 | 9.93959  | 19.43326 | Stalled      | chr11:69112997-69139375   | 24.379  |
| <b>Akap8l</b>        | 157 | 0   | 2.616792 | 445  | 7.416667 | 21.3482  | 14.69769 | Stalled      | chr17:32458368-32489522   | 29.155  |
| <b>Mblac2</b>        | 157 | 0   | 2.616792 | 46   | 0.766667 | 2.33496  | 121.3663 | Stalled      | chr13:81848415-81892274   | 41.86   |
| <b>Tsc22d2</b>       | 157 | 0   | 2.616792 | 344  | 5.733333 | 6.58421  | 14.87364 | Stalled      | chr3:58217610-58270709    | 51.1    |
| <b>Scarb1</b>        | 157 | 0   | 2.616792 | 993  | 16.55    | 26.008   | 8.768054 | Stalled      | chr5:125757459-125823444  | 63.986  |
| <b>Pnpla7</b>        | 157 | 0   | 2.616792 | 419  | 6.983333 | 4.80108  | 37.1191  | Stalled      | chr2:24829552-24909591    | 78.04   |
| <b>Foxo3</b>         | 157 | 0   | 2.616792 | 587  | 9.783333 | 5.73151  | 17.00936 | Stalled      | chr10:41905591-41998548   | 90.958  |
| <b>Ptpra</b>         | 157 | 0   | 2.616792 | 726  | 12.1     | 13.0104  | 29.5766  | Stalled      | chr2:130274013-130380036  | 104.024 |
| <b>Crim1</b>         | 157 | 65  | 2.616792 | 430  | 7.166667 | 1.77358  | 6.593749 | Stalled      | chr17:78597836-78773654   | 173.819 |
| <b>Rrs1</b>          | 156 | 0   | 2.600125 | 21   | 0.35     | 40.2679  | 14.02213 | Stalled      | chr1:9533488-9537535      | 2.048   |
| <b>Fam166a</b>       | 156 | 0   | 2.600125 | 413  | 6.883333 | 0.189541 | 0.036603 | Stalled      | chr2:25072264-25077798    | 3.535   |
| <b>9930012K11Rik</b> | 156 | 0   | 2.600125 | 33   | 0.55     | 1.26012  | 17.34664 | Stalled      | chr14:70554211-70561309   | 5.099   |
| <b>Nme2</b>          | 156 | 0   | 2.600125 | 220  | 3.666667 | 251.428  | 8.787596 | Stalled      | chr11:93811128-93819321   | 6.194   |
| <b>Dcca5</b>         | 156 | 0   | 2.600125 | 196  | 3.266667 | 16.9661  | 7.995676 | Stalled      | chr19:6083096-6091773     | 6.678   |
| <b>Dmap1</b>         | 156 | 0   | 2.600125 | 131  | 2.183333 | 12.404   | 4.184992 | Stalled      | chr4:117347290-117356830  | 7.541   |
| <b>Ddost</b>         | 156 | 0   | 2.600125 | 302  | 5.033333 | 89.3226  | 7.27843  | Stalled      | chr4:137858652-137868526  | 7.875   |
| <b>Ngdn</b>          | 156 | 0   | 2.600125 | 129  | 2.15     | 27.6397  | 15.62648 | Stalled      | chr14:55632290-55642972   | 8.683   |
| <b>Tmem140</b>       | 156 | 0   | 2.600125 | 231  | 3.85     | 3.98857  | 2.635702 | Elongating   | chr6:34811145-34824946    | 11.802  |
| <b>Capn10</b>        | 156 | 0   | 2.600125 | 124  | 2.066667 | 4.7366   | 42.89606 | Stalled      | chr1:94828984-94844525    | 13.542  |
| <b>Tnfrsf10b</b>     | 156 | 0   | 2.600125 | 144  | 2.4      | 2.7518   | 2.191705 | Elongating   | chr14:70165278-70184210   | 16.933  |
| <b>Mum1</b>          | 156 | 0   | 2.600125 | 294  | 4.9      | 8.67428  | 5.238243 | Stalled      | chr10:79687342-79707889   | 18.548  |
| <b>Arf4</b>          | 156 | 0   | 2.600125 | 254  | 4.233333 | 21.2917  | 30.80622 | Stalled      | chr14:27455682-27476744   | 19.063  |
| <b>Ppp1r7</b>        | 156 | 0   | 2.600125 | 327  | 5.45     | 9.84525  | 11.61962 | Stalled      | chr1:95238221-95264195    | 23.975  |
| <b>Fam18a</b>        | 156 | 0   | 2.600125 | 618  | 10.3     | 2.15728  | 0.200321 | Stalled      | chr16:10420651-10449443   | 26.793  |
| <b>Tor1aip1</b>      | 156 | 0   | 2.600125 | 717  | 11.95    | 16.3735  | 14.49371 | Stalled      | chr1:157851729-157885610  | 31.882  |
| <b>Tor1aip2</b>      | 156 | 0   | 2.600125 | 942  | 15.7     | 10.8157  | 14.14446 | Stalled      | chr1:157880793-157915987  | 33.195  |
| <b>BC051142</b>      | 156 | 0   | 2.600125 | 186  | 3.1      | 0.524595 | 78.69771 | Stalled      | chr17:34533764-34597677   | 61.914  |
| <b>Taf4a</b>         | 156 | 0   | 2.600125 | 727  | 12.11667 | 7.81163  | 27.63394 | Stalled      | chr2:179646850-179713351  | 64.502  |
| <b>Spata5</b>        | 156 | 0   | 2.600125 | 1043 | 17.38333 | 4.70748  | 31.9362  | Stalled      | chr3:37317201-37478017    | 158.817 |
| <b>Rnu11</b>         | 155 | 39  | 2.583457 | 0    | 0        | 1.72057  | 461      | Unclassified | chr4:131825993-131828101  | 0.109   |
| <b>Psme2</b>         | 155 | 0   | 2.583457 | 48   | 0.8      | 72.031   | 8.68098  | Stalled      | chr14:56206276-56211858   | 3.583   |
| <b>Chad</b>          | 155 | 0   | 2.583457 | 43   | 0.716667 | 0.628023 | 1.724677 | Elongating   | chr11:94424387-94430441   | 4.055   |
| <b>Gas2l1</b>        | 155 | 0   | 2.583457 | 47   | 0.783333 | 1.16994  | 1.233766 | Stalled      | chr11:4960377-4967303     | 4.927   |



|                      |     |     |          |      |          |          |          |              |                           |         |
|----------------------|-----|-----|----------|------|----------|----------|----------|--------------|---------------------------|---------|
| <b>Slc30a1</b>       | 155 | 0   | 2.583457 | 85   | 1.416667 | 3.45738  | 14.2037  | Stalled      | chr1:193728659-193737126  | 6.468   |
| <b>Mat2a</b>         | 155 | 0   | 2.583457 | 338  | 5.633333 | 40.3634  | 10.77587 | Stalled      | chr6:72382792-72391552    | 6.761   |
| <b>D10Jhu81e</b>     | 155 | 0   | 2.583457 | 129  | 2.15     | 19.9595  | 11.31137 | Stalled      | chr10:77624811-77634513   | 7.703   |
| <b>Atf6b</b>         | 155 | 0   | 2.583457 | 300  | 5        | 37.6127  | 4.110872 | Stalled      | chr17:34782124-34792017   | 7.894   |
| <b>Netd8</b>         | 155 | 0   | 2.583457 | 139  | 2.316667 | 189.622  | 13.22713 | Stalled      | chr14:56281103-56292743   | 9.641   |
| <b>Ttrap</b>         | 155 | 0   | 2.583457 | 89   | 1.483333 | 10.4219  | 41.54876 | Stalled      | chr13:24921527-24934021   | 10.495  |
| <b>Kctd7</b>         | 155 | 0   | 2.583457 | 74   | 1.233333 | 3.26322  | 21.99056 | Stalled      | chr5:130618757-130631678  | 10.922  |
| <b>Pscm1</b>         | 155 | 0   | 2.583457 | 365  | 6.083333 | 57.5133  | 0.85624  | Stalled      | chr12:101348540-101361574 | 11.035  |
| <b>Isca1</b>         | 155 | 0   | 2.583457 | 146  | 2.433333 | 5.30699  | 25.59783 | Stalled      | chr13:59856775-59873150   | 14.376  |
| <b>Fam46c</b>        | 155 | 341 | 2.583457 | 1521 | 25.35    | 31.9119  | 3.509591 | Stalled      | chr3:100275460-100295115  | 17.656  |
| <b>Ficn</b>          | 155 | 0   | 2.583457 | 253  | 4.216667 | 8.36053  | 15.00501 | Stalled      | chr11:59605252-59625275   | 18.024  |
| <b>Isoc2b</b>        | 155 | 0   | 2.583457 | 38   | 0.633333 | 4.98746  | 74.67263 | Stalled      | chr7:4796561-4819781      | 21.221  |
| <b>1300001I01Rik</b> | 155 | 0   | 2.583457 | 777  | 12.95    | 16.4155  | 4.365105 | Stalled      | chr11:74460996-74484349   | 21.354  |
| <b>Trip13</b>        | 155 | 0   | 2.583457 | 299  | 4.983333 | 10.6214  | 29.32114 | Stalled      | chr13:74049909-74077215   | 25.307  |
| <b>Afap11i</b>       | 155 | 0   | 2.583457 | 104  | 1.733333 | 0.052727 | 0.695123 | Unclassified | chr18:61889915-61948316   | 56.402  |
| <b>Gbf1</b>          | 155 | 0   | 2.583457 | 845  | 14.08333 | 10.3718  | 20.12077 | Stalled      | chr19:46225047-46361000   | 133.954 |
| <b>Bre</b>           | 155 | 0   | 2.583457 | 1602 | 26.7     | 12.6861  | 87.70595 | Stalled      | chr5:31998422-32387112    | 386.691 |
| <b>BC056474</b>      | 154 | 0   | 2.56679  | 2    | 0.033333 | 25.1301  | 25.27418 | Unclassified | chr8:87602861-87606238    | 1.378   |
| <b>Foxd4</b>         | 154 | 0   | 2.56679  | 8    | 0.133333 | 0.401182 | 0.432056 | Unclassified | chr19:24973454-24977799   | 2.346   |
| <b>Rrad</b>          | 154 | 0   | 2.56679  | 77   | 1.283333 | 37.5317  | 5.666919 | Stalled      | chr8:107151965-107157221  | 3.257   |
| <b>Tmem129</b>       | 154 | 0   | 2.56679  | 74   | 1.233333 | 7.71385  | 14.12371 | Stalled      | chr5:33995864-34002481    | 4.618   |
| <b>Cnpy2</b>         | 154 | 0   | 2.56679  | 62   | 1.033333 | 39.7914  | 13.50586 | Stalled      | chr10:127757514-127764243 | 4.73    |
| <b>Tmem14c</b>       | 154 | 0   | 2.56679  | 132  | 2.2      | 58.6519  | 13.62288 | Stalled      | chr13:41109618-41117947   | 6.33    |
| <b>Sema3g</b>        | 154 | 0   | 2.56679  | 76   | 1.266667 | 0.194617 | 2.210526 | Stalled      | chr14:32029058-32042697   | 11.64   |
| <b>Brp44l</b>        | 154 | 0   | 2.56679  | 95   | 1.583333 | 10.9933  | 33.71859 | Stalled      | chr17:8474677-8490526     | 13.85   |
| <b>Hnrrnpf</b>       | 154 | 0   | 2.56679  | 1779 | 29.65    | 53.8457  | 4.974475 | Stalled      | chr6:117854799-117875639  | 18.841  |
| <b>Mcm5</b>          | 154 | 0   | 2.56679  | 1024 | 17.06667 | 58.1153  | 5.690689 | Stalled      | chr8:77631426-77652338    | 18.913  |
| <b>Brp44</b>         | 154 | 0   | 2.56679  | 60   | 1        | 19.626   | 68.8068  | Stalled      | chr1:167389338-167411345  | 20.008  |
| <b>Def8</b>          | 154 | 0   | 2.56679  | 158  | 2.633333 | 5.01522  | 10.96968 | Stalled      | chr8:125964885-125987799  | 20.915  |
| <b>Nlrc3</b>         | 154 | 0   | 2.56679  | 399  | 6.65     | 3.31436  | 5.972371 | Stalled      | chr16:3946932-3978632     | 29.701  |
| <b>Cars</b>          | 154 | 0   | 2.56679  | 919  | 15.31667 | 17.2678  | 5.423828 | Stalled      | chr7:150743609-150787947  | 42.339  |
| <b>Rnft2</b>         | 154 | 0   | 2.56679  | 203  | 3.383333 | 0.944171 | 45.32909 | Stalled      | chr5:118640744-118697034  | 54.291  |
| <b>Syt7</b>          | 154 | 0   | 2.56679  | 97   | 1.616667 | 0.195801 | 1.970511 | Unclassified | chr19:10461579-10527671   | 64.093  |
| <b>Mga</b>           | 154 | 0   | 2.56679  | 461  | 7.683333 | 2.92507  | 31.90069 | Stalled      | chr2:119720963-119795317  | 72.355  |
| <b>Gabbr2</b>        | 154 | 0   | 2.56679  | 580  | 9.666667 | 0.057702 | 0        | Unclassified | chr4:46676769-47006586    | 327.818 |
| <b>Aurkaip1</b>      | 153 | 0   | 2.550122 | 9    | 0.15     | 74.4279  | 15.51567 | Unclassified | chr4:155203754-155207168  | 1.415   |
| <b>Cyb561d2</b>      | 153 | 0   | 2.550122 | 70   | 1.166667 | 6.05395  | 3.512803 | Stalled      | chr9:107441341-107446196  | 2.856   |
| <b>Rabac1</b>        | 153 | 0   | 2.550122 | 13   | 0.216667 | 57.0567  | 9.648865 | Stalled      | chr7:25754768-25759747    | 2.98    |
| <b>Fbxl6</b>         | 153 | 0   | 2.550122 | 33   | 0.55     | 23.1772  | 18.32555 | Stalled      | chr15:76366159-76371176   | 3.018   |
| <b>Jmjd6</b>         | 153 | 0   | 2.550122 | 178  | 2.966667 | 39.7262  | 13.35519 | Stalled      | chr11:116698745-116706763 | 6.019   |
| <b>1110005A03Rik</b> | 153 | 0   | 2.550122 | 482  | 8.033333 | 13.499   | 5.127042 | Stalled      | chr11:116702828-116711053 | 6.226   |
| <b>Ddx5</b>          | 153 | 11  | 2.550122 | 541  | 9.016667 | 70.0053  | 7.56803  | Stalled      | chr11:106641669-106661808 | 8.14    |
| <b>Rnaseh2a</b>      | 153 | 0   | 2.550122 | 113  | 1.883333 | 13.4128  | 8.513538 | Stalled      | chr8:87480508-87491910    | 9.403   |
| <b>Nme1</b>          | 153 | 0   | 2.550122 | 255  | 4.25     | 116.399  | 7.012838 | Stalled      | chr11:93820238-93831835   | 9.598   |
| <b>8430406I07Rik</b> | 153 | 0   | 2.550122 | 112  | 1.866667 | 3.12036  | 47.19555 | Stalled      | chr2:144094770-144106995  | 10.196  |
| <b>Tcfap4</b>        | 153 | 0   | 2.550122 | 516  | 8.6      | 8.24145  | 2.095644 | Elongating   | chr16:4544660-4561720     | 15.061  |
| <b>BC031781</b>      | 153 | 0   | 2.550122 | 356  | 5.933333 | 13.0795  | 18.67051 | Stalled      | chr1:182779281-182798245  | 16.965  |
| <b>Fcho1</b>         | 153 | 0   | 2.550122 | 1100 | 18.33333 | 33.5494  | 1.036478 | Elongating   | chr8:74232285-74251580    | 17.296  |
| <b>Atp6v1d</b>       | 153 | 0   | 2.550122 | 86   | 1.433333 | 20.3216  | 41.56507 | Stalled      | chr12:79943968-79964625   | 18.658  |
| <b>Syt16</b>         | 153 | 0   | 2.550122 | 311  | 5.183333 | 12.8778  | 9.401146 | Stalled      | chr2:173900551-173925272  | 22.722  |
| <b>Frmf8</b>         | 153 | 44  | 2.550122 | 370  | 6.166667 | 17.2542  | 7.858863 | Stalled      | chr19:5850973-5877208     | 24.236  |
| <b>Parp9</b>         | 153 | 0   | 2.550122 | 627  | 10.45    | 19.6459  | 7.027602 | Stalled      | chr16:35936555-35972691   | 34.137  |
| <b>Nek9</b>          | 153 | 0   | 2.550122 | 569  | 9.483333 | 16.4357  | 18.15152 | Stalled      | chr12:86640463-86682312   | 39.85   |
| <b>1110003E01Rik</b> | 153 | 0   | 2.550122 | 392  | 6.533333 | 7.95024  | 26.83453 | Stalled      | chr5:65839993-65886074    | 44.082  |
| <b>Tnxb</b>          | 153 | 0   | 2.550122 | 88   | 1.466667 | 0.054891 | 1.413552 | Unclassified | chr17:34805479-34856572   | 49.094  |
| <b>Nup160</b>        | 153 | 0   | 2.550122 | 1044 | 17.4     | 9.22699  | 1.001878 | Elongating   | chr2:90515371-90576485    | 59.115  |
| <b>Cfrl5</b>         | 153 | 56  | 2.550122 | 595  | 9.916667 | 9.18281  | 3.491175 | Stalled      | chr3:87237703-87304600    | 64.898  |
| <b>Kcnq1</b>         | 153 | 0   | 2.550122 | 1509 | 25.15    | 0.052326 | 0.872064 | Stalled      | chr7:150291158-150612947  | 319.79  |
| <b>Attnl1</b>        | 153 | 0   | 2.550122 | 870  | 14.5     | 1.22464  | 35.59538 | Stalled      | chr19:57683523-58207828   | 522.306 |
| <b>D4Wsu53e</b>      | 152 | 0   | 2.533455 | 187  | 3.116667 | 143.172  | 7.296495 | Stalled      | chr4:134477539-134483285  | 3.747   |
| <b>Tnfrsf25</b>      | 152 | 0   | 2.533455 | 5    | 0.083333 | 0.231861 | 1.782497 | Unclassified | chr4:151488451-151494220  | 3.77    |
| <b>Slc39a1</b>       | 152 | 0   | 2.533455 | 68   | 1.133333 | 21.6974  | 15.14258 | Stalled      | chr3:90050113-90057534    | 5.422   |
| <b>Dnpep</b>         | 152 | 0   | 2.533455 | 99   | 1.65     | 24.1314  | 11.06329 | Stalled      | chr1:75305139-75315592    | 8.454   |
| <b>Cdca7</b>         | 152 | 0   | 2.533455 | 352  | 5.866667 | 17.0791  | 8.424723 | Stalled      | chr2:72312275-72324947    | 10.673  |
| <b>Rnps1</b>         | 152 | 0   | 2.533455 | 535  | 8.916667 | 35.6395  | 8.17584  | Stalled      | chr17:24549619-24562842   | 11.224  |
| <b>Dgkq</b>          | 152 | 0   | 2.533455 | 177  | 2.95     | 4.94316  | 7.445946 | Stalled      | chr5:109076062-109091788  | 13.727  |
| <b>Dhodh</b>         | 152 | 0   | 2.533455 | 168  | 2.8      | 6.38466  | 24.19961 | Stalled      | chr8:112117147-112134573  | 15.427  |
| <b>2610002I17Rik</b> | 152 | 0   | 2.533455 | 186  | 3.1      | 6.62901  | 25.69095 | Stalled      | chr9:110205695-110224606  | 16.912  |
| <b>Paip2</b>         | 152 | 0   | 2.533455 | 360  | 6        | 39.856   | 13.22632 | Stalled      | chr18:35756320-35776839   | 18.52   |
| <b>Astl</b>          | 152 | 0   | 2.533455 | 104  | 1.733333 | 0.086269 | 36.31914 | Stalled      | chr2:127162374-127183387  | 19.014  |
| <b>Snx5</b>          | 152 | 0   | 2.533455 | 1480 | 24.66667 | 39.6201  | 8.723661 | Stalled      | chr2:144075861-144098267  | 20.407  |
| <b>Plxnb2</b>        | 152 | 0   | 2.533455 | 478  | 7.966667 | 17.0144  | 4.392176 | Stalled      | chr15:88985978-89013218   | 25.241  |
| <b>mmu-mir-193b</b>  | 152 | 0   | 2.533455 | 63   | 1.05     | ND       | ND       | Unclassified | chr16:13432140-13463160   | 31.021  |
| <b>Thrap3</b>        | 152 | 0   | 2.533455 | 1282 | 21.36667 | 43.9407  | 13.00276 | Stalled      | chr4:125841326-125881954  | 38.629  |
| <b>Kdm5a</b>         | 152 | 0   | 2.533455 | 637  | 10.61667 | 5.75651  | 63.45053 | Stalled      | chr6:120312116-120394592  | 80.477  |
| <b>C8g</b>           | 151 | 0   | 2.516787 | 0    | 0        | 1.46897  | 233      | Unclassified | chr2:25354175-25358026    | 1.852   |
| <b>Ccdc115</b>       | 151 | 0   | 2.516787 | 33   | 0.55     | 20.5589  | 20.19995 | Stalled      | chr1:34493515-34498517    | 3.003   |
| <b>Cdca3</b>         | 151 | 44  | 2.516787 | 46   | 0.766667 | 43.1525  | 13.0706  | Stalled      | chr6:124778193-124783719  | 3.527   |
| <b>Cdk4</b>          | 151 | 0   | 2.516787 | 158  | 2.633333 | 95.1985  | 3.754178 | Stalled      | chr10:126498658-126504338 | 3.681   |
| <b>H2-M3</b>         | 151 | 0   | 2.516787 | 108  | 1.8      | 34.5875  | 5.058461 | Stalled      | chr17:37405178-37411430   | 4.253   |
| <b>Yif1a</b>         | 151 | 0   | 2.516787 | 99   | 0.983333 | 19.0053  | 7.320279 | Stalled      | chr19:5086552-5092856     | 4.305   |
| <b>Smcr7</b>         | 151 | 0   | 2.516787 | 54   | 1.566667 | 5.46196  | 4.4458   | Stalled      | chr11:60539899-60546453   | 4.555   |
| <b>Slc27a3</b>       | 151 | 0   | 2.516787 | 33   | 0.55     | 1.5842   | 2.719424 | Stalled      | chr3:90189154-90195849    | 4.696   |
| <b>Ntn3</b>          | 151 | 0   | 2.516787 | 112  | 1.866667 | 0        | 0.194907 | Stalled      | chr17:24340790-24348332   | 5.543   |
| <b>Imp4</b>          | 151 | 0   | 2.516787 | 234  | 3.9      | 24.2895  | 6.074837 | Stalled      | chr1:34494673-34502592    | 5.92    |
| <b>Isg20</b>         | 151 | 0   | 2.516787 | 197  | 3.283333 | 56.7877  | 4.058658 | Stalled      | chr7:86056650-86065282    | 6.633   |

|                      |     |     |          |      |          |          |          |              |                           |         |
|----------------------|-----|-----|----------|------|----------|----------|----------|--------------|---------------------------|---------|
| <b>Oxa1l</b>         | 151 | 0   | 2.516787 | 290  | 4.833333 | 17.5787  | 4.995131 | Stalled      | chr14:54978524-54989353   | 8.83    |
| <b>Mon1b</b>         | 151 | 0   | 2.516787 | 211  | 3.516667 | 12.5943  | 11.50723 | Stalled      | chr8:116157485-116169079  | 9.595   |
| <b>Slc5a6</b>        | 151 | 0   | 2.516787 | 64   | 1.066667 | 3.36517  | 21.94536 | Stalled      | chr5:31338408-31352375    | 11.968  |
| <b>Ecd4</b>          | 151 | 0   | 2.516787 | 220  | 3.666667 | 14.5184  | 10.27181 | Stalled      | chr8:108402850-108417107  | 12.258  |
| <b>Cbl1l</b>         | 151 | 0   | 2.516787 | 99   | 1.65     | 5.04908  | 35.14693 | Stalled      | chr12:32171763-32186405   | 12.643  |
| <b>Cc2d1b</b>        | 151 | 0   | 2.516787 | 300  | 5        | 20.4815  | 15.30537 | Stalled      | chr4:108290560-108306727  | 14.168  |
| <b>Ppil3</b>         | 151 | 0   | 2.516787 | 113  | 1.883333 | 19.3107  | 24.43065 | Stalled      | chr1:58487836-58504330    | 14.495  |
| <b>Gaa</b>           | 151 | 0   | 2.516787 | 263  | 4.383333 | 12.2719  | 3.589065 | Stalled      | chr11:119127280-119147012 | 17.733  |
| <b>Patz1</b>         | 151 | 0   | 2.516787 | 605  | 10.08333 | 22.472   | 6.527896 | Stalled      | chr11:3188459-3208520     | 18.062  |
| <b>Glis2</b>         | 151 | 0   | 2.516787 | 196  | 3.266667 | 0.672866 | 1.123498 | Stalled      | chr16:4592712-4615957     | 21.246  |
| <b>Extl2</b>         | 151 | 0   | 2.516787 | 98   | 1.633333 | 6.37402  | 31.7463  | Stalled      | chr3:115708366-115731934  | 21.569  |
| <b>Lss</b>           | 151 | 0   | 2.516787 | 480  | 8        | 38.0089  | 9.819052 | Stalled      | chr10:75992371-76016679   | 22.309  |
| <b>Dnaja3</b>        | 151 | 0   | 2.516787 | 205  | 3.416667 | 11.2412  | 32.29982 | Stalled      | chr16:4682069-4707690     | 23.622  |
| <b>Asrgl1</b>        | 151 | 0   | 2.516787 | 224  | 3.733333 | 14.9137  | 18.32741 | Stalled      | chr19:9186208-9212056     | 23.849  |
| <b>Aasdh</b>         | 151 | 0   | 2.516787 | 185  | 3.083333 | 2.37537  | 72.92643 | Stalled      | chr5:77304961-77336539    | 29.579  |
| <b>Tbc1d24</b>       | 151 | 0   | 2.516787 | 117  | 1.95     | 2.0289   | 17.14444 | Stalled      | chr17:24312376-24344507   | 30.132  |
| <b>Hnrnpc</b>        | 151 | 0   | 2.516787 | 1087 | 18.11667 | 102.304  | 11.0459  | Stalled      | chr14:52693054-52725703   | 30.65   |
| <b>Per2</b>          | 151 | 0   | 2.516787 | 296  | 4.933333 | 1.60488  | 12.51611 | Stalled      | chr1:93312558-93357905    | 43.348  |
| <b>Tmem229b</b>      | 151 | 0   | 2.516787 | 1042 | 17.36667 | 10.8088  | 3.561971 | Stalled      | chr12:80062782-80110264   | 45.483  |
| <b>Ass1</b>          | 151 | 0   | 2.516787 | 819  | 13.65    | 11.066   | 9.500363 | Stalled      | chr2:31323789-31376190    | 50.402  |
| <b>Ganc</b>          | 151 | 0   | 2.516787 | 111  | 1.85     | 6.47723  | 97.19702 | Stalled      | chr2:120227631-120286588  | 56.958  |
| <b>Slc30a7</b>       | 151 | 0   | 2.516787 | 761  | 12.68333 | 11.0638  | 14.78829 | Stalled      | chr3:115648862-115712297  | 61.436  |
| <b>Akap12</b>        | 151 | 0   | 2.516787 | 276  | 4.6      | 3.54691  | 11.5134  | Stalled      | chr10:5987070-6082212     | 93.143  |
| <b>Pkib</b>          | 151 | 0   | 2.516787 | 930  | 15.5     | 8.01168  | 22.68829 | Stalled      | chr10:57349886-57460918   | 109.033 |
| <b>Casz1</b>         | 151 | 0   | 2.516787 | 990  | 16.5     | 4.03116  | 0.524798 | Stalled      | chr4:148176500-148329001  | 150.502 |
| <b>Ppm1l</b>         | 151 | 0   | 2.516787 | 961  | 16.01667 | 5.30187  | 31.10971 | Stalled      | chr3:69118839-69359318    | 238.48  |
| <b>Fam96b</b>        | 150 | 0   | 2.50012  | 27   | 0.45     | 59.7952  | 8.178122 | Unclassified | chr8:107163738-107167628  | 1.891   |
| <b>1110020P15Rik</b> | 150 | 0   | 2.50012  | 33   | 0.55     | 198.412  | 10.26145 | Stalled      | chr11:4601970-4606347     | 2.378   |
| <b>Fth1</b>          | 150 | 0   | 2.50012  | 131  | 2.183333 | 583.345  | 5.694662 | Stalled      | chr19:10055192-10059582   | 2.391   |
| <b>Mrpl41</b>        | 150 | 0   | 2.50012  | 76   | 1.266667 | 13.9012  | 10.81347 | Stalled      | chr2:24827989-24832618    | 2.63    |
| <b>Thap7</b>         | 150 | 0   | 2.50012  | 81   | 1.35     | 15.5014  | 13.59351 | Stalled      | chr16:17528074-17533145   | 3.072   |
| <b>Mrpl28</b>        | 150 | 0   | 2.50012  | 39   | 0.65     | 47.4482  | 9.633425 | Stalled      | chr17:26258476-26263558   | 3.083   |
| <b>Cfl1</b>          | 150 | 0   | 2.50012  | 429  | 7.15     | 449.307  | 2.580521 | Stalled      | chr19:5488454-5494031     | 3.578   |
| <b>Ankle1</b>        | 150 | 0   | 2.50012  | 83   | 1.383333 | 10.5505  | 7.681934 | Stalled      | chr8:73927910-73933803    | 3.894   |
| <b>Fbxl14</b>        | 150 | 0   | 2.50012  | 149  | 2.483333 | 17.2048  | 5.309552 | Stalled      | chr6:119427685-119433904  | 4.22    |
| <b>Gmpr2</b>         | 150 | 0   | 2.50012  | 113  | 1.883333 | 12.3081  | 10.33595 | Stalled      | chr14:56289071-56297588   | 6.518   |
| <b>Fzd5</b>          | 150 | 0   | 2.50012  | 43   | 0.716667 | 2.34094  | 13.09461 | Stalled      | chr1:64777131-64786324    | 7.194   |
| <b>Pex6</b>          | 150 | 0   | 2.50012  | 222  | 3.7      | 13.2986  | 13.85452 | Stalled      | chr17:46846411-46862490   | 14.08   |
| <b>Aasdhppt</b>      | 150 | 0   | 2.50012  | 44   | 0.733333 | 7.74563  | 63.40573 | Stalled      | chr9:4294792-4311494      | 14.703  |
| <b>Spty2d1</b>       | 150 | 0   | 2.50012  | 251  | 4.183333 | 6.47702  | 18.47828 | Stalled      | chr7:54245766-54265784    | 18.019  |
| <b>Uhrf1</b>         | 150 | 0   | 2.50012  | 1711 | 28.51667 | 50.9653  | 4.051245 | Stalled      | chr17:56440759-56462909   | 20.151  |
| <b>Kbtbd3</b>        | 150 | 0   | 2.50012  | 45   | 0.75     | 0.681107 | 98.0561  | Stalled      | chr9:4307815-4331732      | 21.918  |
| <b>Arhgap1</b>       | 150 | 0   | 2.50012  | 371  | 6.183333 | 8.58126  | 12.4876  | Stalled      | chr2:91488274-91512475    | 22.202  |
| <b>Ckap2l</b>        | 150 | 0   | 2.50012  | 230  | 3.833333 | 9.77458  | 21.16481 | Stalled      | chr2:129093946-129124948  | 29.003  |
| <b>Hadhb</b>         | 150 | 0   | 2.50012  | 260  | 4.333333 | 5.21417  | 39.41444 | Stalled      | chr5:30479861-30511123    | 29.263  |
| <b>Dcun1d2</b>       | 150 | 0   | 2.50012  | 192  | 3.2      | 7.10935  | 25.97491 | Stalled      | chr8:13255962-13290126    | 32.165  |
| <b>Metap2</b>        | 150 | 0   | 2.50012  | 763  | 12.71667 | 22.1397  | 0.119719 | Stalled      | chr10:93321234-93355947   | 32.714  |
| <b>Zfp341</b>        | 150 | 0   | 2.50012  | 182  | 3.033333 | 1.8283   | 49.48206 | Stalled      | chr2:154437103-154472553  | 33.451  |
| <b>Gabbp2</b>        | 150 | 0   | 2.50012  | 979  | 16.31667 | 14.9757  | 18.48674 | Stalled      | chr3:94985689-95023864    | 36.176  |
| <b>Rufy1</b>         | 150 | 0   | 2.50012  | 561  | 9.35     | 7.12822  | 25.49735 | Stalled      | chr11:50202804-50246613   | 41.81   |
| <b>Flt4</b>          | 150 | 0   | 2.50012  | 69   | 1.15     | 0.119637 | 1.136143 | Unclassified | chr11:49421180-49466239   | 43.06   |
| <b>Tbc1d2</b>        | 150 | 0   | 2.50012  | 484  | 8.066667 | 1.94693  | 16.60888 | Stalled      | chr4:46617261-46665071    | 45.811  |
| <b>Tle3</b>          | 150 | 0   | 2.50012  | 1092 | 18.2     | 11.4811  | 4.842201 | Stalled      | chr9:61218172-61266304    | 46.133  |
| <b>Dapp1</b>         | 150 | 0   | 2.50012  | 1132 | 18.86667 | 15.3448  | 12.03459 | Stalled      | chr3:137593969-137646513  | 50.545  |
| <b>Hmg20a</b>        | 150 | 0   | 2.50012  | 264  | 4.4      | 6.15581  | 51.07945 | Stalled      | chr9:56264652-56344743    | 78.092  |
| <b>Wnt5b</b>         | 150 | 0   | 2.50012  | 916  | 15.26667 | 0.216218 | 0.107924 | Stalled      | chr6:119382548-119496365  | 111.818 |
| <b>Gna14</b>         | 150 | 0   | 2.50012  | 241  | 4.016667 | 1.65903  | 2.936438 | Unclassified | chr19:16508156-16685308   | 175.153 |
| <b>Mrpl51</b>        | 149 | 0   | 2.483452 | 11   | 0.183333 | 28.0941  | 34.17304 | Stalled      | chr6:125140217-125144410  | 2.194   |
| <b>Snapc5</b>        | 149 | 0   | 2.483452 | 55   | 0.916667 | 21.5266  | 23.55766 | Stalled      | chr9:64025103-64030495    | 3.393   |
| <b>Tas1f3</b>        | 149 | 0   | 2.483452 | 151  | 2.516667 | 0.529279 | 8.008857 | Elongating   | chr4:155233378-155239462  | 4.085   |
| <b>Tmem167b</b>      | 149 | 0   | 2.483452 | 51   | 0.85     | 4.55092  | 14.21755 | Stalled      | chr3:108359342-108367384  | 6.043   |
| <b>Zfp526</b>        | 149 | 0   | 2.483452 | 214  | 3.566667 | 5.10007  | 4.061446 | Stalled      | chr7:26004469-26012523    | 6.055   |
| <b>Rassf1</b>        | 149 | 0   | 2.483452 | 129  | 2.15     | 15.2581  | 18.65771 | Stalled      | chr9:107454986-107464591  | 7.606   |
| <b>Tcp1l</b>         | 149 | 0   | 2.483452 | 279  | 4.65     | 110.206  | 12.01872 | Stalled      | chr17:13107330-13117933   | 8.604   |
| <b>Bak1</b>          | 149 | 0   | 2.483452 | 293  | 4.883333 | 41.6879  | 4.495    | Stalled      | chr17:27156756-27167571   | 8.816   |
| <b>Obfc2a</b>        | 149 | 107 | 2.483452 | 583  | 9.716667 | 18.6382  | 11.50299 | Stalled      | chr1:51526331-51537243    | 8.913   |
| <b>Dut</b>           | 149 | 0   | 2.483452 | 397  | 6.616667 | 31.1269  | 6.278303 | Stalled      | chr2:125070983-125084785  | 11.803  |
| <b>Atrip</b>         | 149 | 0   | 2.483452 | 626  | 10.43333 | 8.8004   | 5.879062 | Stalled      | chr9:108962262-108978638  | 14.377  |
| <b>Fus</b>           | 149 | 0   | 2.483452 | 695  | 11.58333 | 203.768  | 12.66346 | Stalled      | chr7:135108992-135125545  | 14.554  |
| <b>Gstt1</b>         | 149 | 0   | 2.483452 | 24   | 0.4      | 5.67143  | 4.010881 | Unclassified | chr10:75246557-75263329   | 14.773  |
| <b>Fam76b</b>        | 149 | 0   | 2.483452 | 234  | 3.9      | 6.10703  | 23.39506 | Stalled      | chr9:13630170-13650966    | 18.797  |
| <b>Ncoa4</b>         | 149 | 0   | 2.483452 | 296  | 4.933333 | 4.19904  | 18.44521 | Stalled      | chr14:32971077-32992549   | 19.473  |
| <b>Ccdc49</b>        | 149 | 0   | 2.483452 | 279  | 4.65     | 9.22533  | 15.08389 | Stalled      | chr11:97606784-97629927   | 21.144  |
| <b>Hsf1</b>          | 149 | 0   | 2.483452 | 334  | 5.566667 | 17.075   | 30.71025 | Stalled      | chr15:76305874-76331402   | 23.529  |
| <b>Aldh2</b>         | 149 | 0   | 2.483452 | 207  | 3.45     | 49.7011  | 14.18637 | Stalled      | chr5:122017695-122045833  | 26.139  |
| <b>Ss181l</b>        | 149 | 0   | 2.483452 | 219  | 3.65     | 2.40309  | 32.83889 | Stalled      | chr2:179775187-179804905  | 27.719  |
| <b>Papln</b>         | 149 | 0   | 2.483452 | 260  | 4.333333 | 3.5581   | 2.988893 | Stalled      | chr12:85102590-85133332   | 28.743  |
| <b>Csde1</b>         | 149 | 0   | 2.483452 | 766  | 12.76667 | 28.9189  | 21.0922  | Stalled      | chr3:102822468-102862111  | 37.644  |
| <b>Ky</b>            | 149 | 0   | 2.483452 | 87   | 1.45     | 0.26552  | 1.550439 | Unclassified | chr9:102406467-102448569  | 40.103  |
| <b>Snx2</b>          | 149 | 0   | 2.483452 | 1186 | 19.76667 | 78.4031  | 13.23133 | Stalled      | chr18:53334018-53380514   | 44.497  |
| <b>Hdlbp</b>         | 149 | 0   | 2.483452 | 1456 | 24.26667 | 42.8601  | 21.12066 | Stalled      | chr1:95302516-95377385    | 72.87   |
| <b>Apaf1</b>         | 149 | 0   | 2.483452 | 411  | 6.85     | 6.39764  | 41.86239 | Stalled      | chr10:90452055-90547488   | 93.434  |
| <b>Cuedc1</b>        | 149 | 0   | 2.483452 | 325  | 5.416667 | 0.978182 | 4.65704  | Stalled      | chr11:87910810-88006420   | 93.611  |
| <b>Rfx4</b>          | 149 | 0   | 2.483452 | 315  | 5.25     | 0.107345 | 0.32184  | Unclassified | chr10:84216792-84369283   | 150.492 |
| <b>Mrpl34</b>        | 148 | 0   | 2.466785 | 0    | 0        | 46.851   | 76       | Unclassified | chr8:73986824-73989652    | 0.829   |
| <b>Romo1</b>         | 148 | 0   | 2.466785 | 37   | 0.616667 | 172.098  | 4.35935  | Unclassified | chr2:155968079-155971529  | 1.451   |

|                      |     |    |          |      |          |          |          |              |                           |         |
|----------------------|-----|----|----------|------|----------|----------|----------|--------------|---------------------------|---------|
| <b>Leng9</b>         | 148 | 0  | 2.466785 | 112  | 1.866667 | 14.7691  | 0.944299 | Elongating   | chr7:4099784-4103474      | 1.691   |
| <b>Trappc1</b>       | 148 | 0  | 2.466785 | 17   | 0.283333 | 22.5485  | 14.44562 | Unclassified | chr11:69135487-69139295   | 1.809   |
| <b>Fos</b>           | 148 | 0  | 2.466785 | 29   | 0.483333 | 2.39358  | 16.01658 | Stalled      | chr12:86812850-86818219   | 3.37    |
| <b>Rps14</b>         | 148 | 0  | 2.466785 | 392  | 6.533333 | 831.7    | 2.622606 | Stalled      | chr18:60932249-60938199   | 3.951   |
| <b>Chchd5</b>        | 148 | 0  | 2.466785 | 49   | 0.816667 | 7.66889  | 11.71472 | Stalled      | chr2:128953435-128959845  | 4.411   |
| <b>Sfrs1</b>         | 148 | 0  | 2.466785 | 231  | 3.85     | 44.9905  | 11.89631 | Stalled      | chr11:87859172-87867259   | 6.088   |
| <b>1810063B07Rik</b> | 148 | 0  | 2.466785 | 91   | 1.516667 | 2.48989  | 23.99342 | Stalled      | chr14:20894858-20904394   | 7.537   |
| <b>Ankrd39</b>       | 148 | 0  | 2.466785 | 73   | 1.216667 | 5.30206  | 12.98198 | Stalled      | chr1:36595017-36606046    | 9.03    |
| <b>BC048644</b>      | 148 | 0  | 2.466785 | 64   | 1.066667 | 2.71014  | 44.98777 | Stalled      | chr8:124429732-124442328  | 10.597  |
| <b>9130401M01Rik</b> | 148 | 0  | 2.466785 | 179  | 2.983333 | 16.4598  | 14.73549 | Stalled      | chr15:57853826-57867849   | 12.024  |
| <b>1110007C09Rik</b> | 148 | 0  | 2.466785 | 99   | 1.65     | 5.49777  | 19.57075 | Stalled      | chr13:49298319-49313395   | 13.077  |
| <b>Scd1</b>          | 148 | 0  | 2.466785 | 751  | 12.51667 | 79.9137  | 4.770616 | Stalled      | chr19:44468940-44484199   | 13.26   |
| <b>Mrps25</b>        | 148 | 0  | 2.466785 | 240  | 4        | 5.56269  | 3.195714 | Stalled      | chr6:92119516-92136017    | 14.502  |
| <b>Elf4g2</b>        | 148 | 0  | 2.466785 | 852  | 14.2     | 41.0652  | 11.56463 | Stalled      | chr7:118211498-118228544  | 15.047  |
| <b>Tmbim6</b>        | 148 | 0  | 2.466785 | 544  | 9.066667 | 97.1439  | 7.964249 | Stalled      | chr15:99221377-99240480   | 17.104  |
| <b>Nfs1</b>          | 148 | 0  | 2.466785 | 168  | 2.8      | 12.7075  | 37.63196 | Stalled      | chr2:155949372-155971922  | 20.551  |
| <b>Irs2</b>          | 148 | 71 | 2.466785 | 447  | 7.45     | 9.48837  | 9.54509  | Stalled      | chr8:10986963-11010430    | 21.468  |
| <b>Hspa14</b>        | 148 | 0  | 2.466785 | 399  | 6.65     | 31.4186  | 21.11388 | Stalled      | chr2:3406125-3432086      | 23.962  |
| <b>Polr</b>          | 148 | 0  | 2.466785 | 418  | 6.966667 | 4.32884  | 4.161844 | Stalled      | chr13:69636837-69674742   | 35.906  |
| <b>Dph5</b>          | 148 | 58 | 2.466785 | 327  | 5.45     | 14.2681  | 48.87339 | Stalled      | chr3:115589100-115632241  | 41.142  |
| <b>Tmem87a</b>       | 148 | 0  | 2.466785 | 497  | 8.283333 | 6.54902  | 28.25669 | Stalled      | chr2:120181044-120231852  | 48.809  |
| <b>Itga4</b>         | 148 | 85 | 2.466785 | 667  | 11.11667 | 6.06692  | 18.56177 | Stalled      | chr2:79093582-79173271    | 77.69   |
| <b>Asxl2</b>         | 148 | 0  | 2.466785 | 728  | 12.13333 | 4.70347  | 47.46042 | Stalled      | chr12:3424883-3506849     | 79.967  |
| <b>Stat4</b>         | 148 | 0  | 2.466785 | 1081 | 18.01667 | 12.5519  | 10.71683 | Stalled      | chr1:52063087-52164028    | 98.942  |
| <b>Dock4</b>         | 148 | 0  | 2.466785 | 418  | 6.966667 | 0.451268 | 34.69384 | Stalled      | chr12:41170639-41573075   | 400.437 |
| <b>2310016E02Rik</b> | 147 | 0  | 2.450117 | 1    | 0.016667 | 115.791  | 56.53897 | Unclassified | chr5:31208890-31212095    | 1.206   |
| <b>Rpl8</b>          | 147 | 0  | 2.450117 | 173  | 2.883333 | 1421.8   | 3.218389 | Stalled      | chr15:76732500-76736748   | 2.249   |
| <b>Mpv17l2</b>       | 147 | 0  | 2.450117 | 48   | 0.8      | 21.7321  | 5.041807 | Stalled      | chr8:73282547-73286820    | 2.274   |
| <b>Zfp688</b>        | 147 | 0  | 2.450117 | 34   | 0.566667 | 16.6835  | 14.91015 | Stalled      | chr7:134562477-134567536  | 3.06    |
| <b>Iqcc</b>          | 147 | 0  | 2.450117 | 42   | 0.7      | 5.59991  | 14.48536 | Stalled      | chr4:129292860-129298337  | 3.478   |
| <b>Zfp1</b>          | 147 | 0  | 2.450117 | 63   | 1.05     | 12.6899  | 12.87404 | Stalled      | chr19:6080762-6086891     | 4.13    |
| <b>Prmt6</b>         | 147 | 0  | 2.450117 | 88   | 1.466667 | 21.7184  | 6.981543 | Stalled      | chr3:110049029-110055916  | 4.888   |
| <b>Ptgs2</b>         | 147 | 0  | 2.450117 | 51   | 0.85     | 10.7724  | 13.48435 | Stalled      | chr2:32249409-32258260    | 6.852   |
| <b>Magmas</b>        | 147 | 0  | 2.450117 | 146  | 2.433333 | 13.9776  | 11.40712 | Stalled      | chr16:4616465-4626946     | 8.482   |
| <b>Hap1</b>          | 147 | 0  | 2.450117 | 15   | 0.25     | 1.1297   | 4.453366 | Unclassified | chr11:100208640-100219455 | 8.816   |
| <b>Prmt1</b>         | 147 | 0  | 2.450117 | 792  | 13.2     | 91.445   | 3.053002 | Stalled      | chr7:52232127-52243702    | 9.576   |
| <b>Bcl9l</b>         | 147 | 0  | 2.450117 | 631  | 10.51667 | 25.597   | 0.288493 | Stalled      | chr9:44305218-44318495    | 11.278  |
| <b>Gbp3</b>          | 147 | 0  | 2.450117 | 195  | 3.25     | 32.3967  | 2.054769 | Elongating   | chr3:142221015-142236176  | 13.162  |
| <b>Pwp2</b>          | 147 | 0  | 2.450117 | 442  | 7.366667 | 8.15344  | 5.409939 | Stalled      | chr10:77633654-77649894   | 14.241  |
| <b>Tmem43</b>        | 147 | 0  | 2.450117 | 122  | 2.033333 | 7.07696  | 24.14321 | Stalled      | chr6:91421744-91438452    | 14.709  |
| <b>1700021F05Rik</b> | 147 | 0  | 2.450117 | 119  | 1.983333 | 8.58902  | 18.66667 | Stalled      | chr10:43244926-43262800   | 15.875  |
| <b>Extl1</b>         | 147 | 0  | 2.450117 | 94   | 1.566667 | 2.3048   | 3.197113 | Stalled      | chr4:133912287-133930462  | 16.176  |
| <b>Arhgap11a</b>     | 147 | 0  | 2.450117 | 321  | 5.35     | 30.6154  | 14.81902 | Stalled      | chr2:113671649-113690818  | 17.17   |
| <b>Agbl5</b>         | 147 | 48 | 2.450117 | 522  | 8.7      | 3.81859  | 3.869937 | Stalled      | chr5:31189224-31209039    | 17.816  |
| <b>Zfp78</b>         | 147 | 0  | 2.450117 | 40   | 0.666667 | 0.725257 | 26.99688 | Stalled      | chr7:6314014-6335315      | 19.302  |
| <b>Ighmbp2</b>       | 147 | 0  | 2.450117 | 527  | 8.783333 | 4.35475  | 9.384001 | Stalled      | chr19:3259075-3285010     | 23.936  |
| <b>Tcf3</b>          | 147 | 0  | 2.450117 | 1117 | 18.61667 | 72.5091  | 3.624968 | Stalled      | chr10:79871909-79898398   | 24.49   |
| <b>Dnaic2</b>        | 147 | 0  | 2.450117 | 168  | 2.8      | 0.544616 | 0.895582 | Unclassified | chr11:114586725-114619200 | 30.476  |
| <b>Zfp143</b>        | 147 | 0  | 2.450117 | 429  | 7.15     | 4.61453  | 38.30773 | Stalled      | chr7:117203215-117238906  | 33.692  |
| <b>Tmem116</b>       | 147 | 0  | 2.450117 | 182  | 3.033333 | 1.20648  | 97.89027 | Stalled      | chr5:121900717-121945429  | 42.713  |
| <b>Acsl3</b>         | 147 | 0  | 2.450117 | 472  | 7.866667 | 13.1391  | 27.89098 | Stalled      | chr1:78652399-78704317    | 49.919  |
| <b>Sin3a</b>         | 147 | 0  | 2.450117 | 570  | 9.5      | 9.639    | 20.52918 | Stalled      | chr9:56922182-56976175    | 51.994  |
| <b>St7</b>           | 147 | 0  | 2.450117 | 4433 | 73.88333 | 11.7428  | 7.877697 | Stalled      | chr6:17697215-17893022    | 193.808 |
| <b>Cirbp</b>         | 146 | 0  | 2.43345  | 147  | 2.45     | 12.0703  | 9.955144 | Stalled      | chr10:79628585-79634398   | 3.814   |
| <b>Sic16a13</b>      | 146 | 0  | 2.43345  | 30   | 0.5      | 4.89146  | 19.39537 | Stalled      | chr11:70030293-70036496   | 4.204   |
| <b>Nat9</b>          | 146 | 0  | 2.43345  | 55   | 0.916667 | 9.71276  | 11.14595 | Stalled      | chr11:115044145-115050630 | 4.486   |
| <b>Mcm7</b>          | 146 | 0  | 2.43345  | 569  | 9.483333 | 53.2126  | 4.66855  | Stalled      | chr5:138605816-138615090  | 7.275   |
| <b>Ssh3</b>          | 146 | 0  | 2.43345  | 65   | 1.083333 | 6.6509   | 2.820547 | Stalled      | chr19:4261667-4271172     | 7.506   |
| <b>Tcam1</b>         | 146 | 0  | 2.43345  | 21   | 0.35     | 0.480881 | 8.651797 | Stalled      | chr11:106135985-106149457 | 11.473  |
| <b>Trim39</b>        | 146 | 0  | 2.43345  | 167  | 2.783333 | 7.22226  | 42.02315 | Stalled      | chr17:36395817-36410378   | 12.562  |
| <b>Plekhg2</b>       | 146 | 0  | 2.43345  | 223  | 3.716667 | 11.5035  | 9.389007 | Stalled      | chr7:29144622-29159681    | 13.06   |
| <b>Surf4</b>         | 146 | 0  | 2.43345  | 678  | 11.3     | 0        | 5.473091 | Stalled      | chr2:26775560-26791031    | 13.472  |
| <b>Nqo1</b>          | 146 | 0  | 2.43345  | 48   | 0.8      | 0.718441 | 15.79071 | Stalled      | chr8:109912124-109929105  | 14.982  |
| <b>Mboat7</b>        | 146 | 0  | 2.43345  | 170  | 2.833333 | 12.7187  | 28.16158 | Stalled      | chr7:3629390-3647127      | 15.738  |
| <b>Narf</b>          | 146 | 0  | 2.43345  | 96   | 1.6      | 6.55542  | 29.93299 | Stalled      | chr11:121096549-121117170 | 18.622  |
| <b>Naaa</b>          | 146 | 0  | 2.43345  | 74   | 1.233333 | 6.27026  | 48.01268 | Stalled      | chr5:92686685-92709207    | 20.523  |
| <b>Brap</b>          | 146 | 0  | 2.43345  | 264  | 4.4      | 9.95559  | 16.39027 | Stalled      | chr5:122108594-122137256  | 26.663  |
| <b>Fgr</b>           | 146 | 0  | 2.43345  | 313  | 5.216667 | 1.39187  | 3.311284 | Stalled      | chr4:132528009-132557797  | 27.789  |
| <b>Dgat2</b>         | 146 | 0  | 2.43345  | 82   | 1.366667 | 1.4457   | 44.86199 | Stalled      | chr7:106302172-106333223  | 29.052  |
| <b>2310061C15Rik</b> | 146 | 0  | 2.43345  | 155  | 2.583333 | 7.5642   | 66.14039 | Stalled      | chr8:119412584-119447336  | 32.753  |
| <b>Wdr89</b>         | 146 | 0  | 2.43345  | 300  | 5        | 170.552  | 56.36404 | Stalled      | chr12:76731581-76772524   | 38.944  |
| <b>Dusp10</b>        | 146 | 0  | 2.43345  | 1194 | 19.9     | 22.793   | 10.31952 | Stalled      | chr1:185856339-185899515  | 41.177  |
| <b>Map3k9</b>        | 146 | 0  | 2.43345  | 211  | 3.516667 | 1.86339  | 16.89739 | Stalled      | chr12:82829400-82883994   | 52.595  |
| <b>Fyco1</b>         | 146 | 68 | 2.43345  | 521  | 8.683333 | 2.94914  | 38.6879  | Stalled      | chr9:123698627-123763020  | 62.394  |
| <b>Xrn2</b>          | 146 | 0  | 2.43345  | 765  | 12.75    | 18.2977  | 36.7927  | Stalled      | chr2:146836795-146903733  | 64.939  |
| <b>Nuak1</b>         | 146 | 0  | 2.43345  | 144  | 2.4      | 0.776225 | 16.70488 | Stalled      | chr10:83834063-83905216   | 69.154  |
| <b>Zpbp</b>          | 146 | 0  | 2.43345  | 154  | 2.566667 | 2.45727  | 155.8444 | Stalled      | chr11:11182515-11364411   | 179.897 |
| <b>Mthfd1l</b>       | 146 | 0  | 2.43345  | 2439 | 40.65    | 20.2802  | 20.3516  | Stalled      | chr10:6190410-6375466     | 183.057 |
| <b>Trmt112</b>       | 145 | 0  | 2.416782 | 16   | 0.266667 | 41.7191  | 8.191523 | Unclassified | chr19:6982187-6985513     | 1.327   |
| <b>Sit1</b>          | 145 | 0  | 2.416782 | 10   | 0.166667 | 9.35473  | 2.124024 | Unclassified | chr4:43494955-43498581    | 1.627   |
| <b>Prdx5</b>         | 145 | 0  | 2.416782 | 27   | 0.45     | 104.409  | 24.28625 | Stalled      | chr19:6981308-6986135     | 2.828   |
| <b>Hddc3</b>         | 145 | 0  | 2.416782 | 11   | 0.183333 | 4.09617  | 15.43928 | Stalled      | chr7:87486022-87490983    | 2.962   |
| <b>0910001L09Rik</b> | 145 | 0  | 2.416782 | 122  | 2.033333 | 34.8428  | 5.178827 | Stalled      | chr5:138694709-138700622  | 3.914   |
| <b>Rps3a</b>         | 145 | 0  | 2.416782 | 288  | 4.8      | 115.824  | 4.781887 | Stalled      | chr3:85941861-85948590    | 4.73    |
| <b>Gstm1</b>         | 145 | 0  | 2.416782 | 15   | 0.25     | 5.31057  | 11.73575 | Stalled      | chr3:107815168-107822891  | 5.724   |
| <b>Klhl17</b>        | 145 | 0  | 2.416782 | 62   | 1.033333 | 0        | 5.548979 | Stalled      | chr4:155603152-155610966  | 5.815   |

|                      |     |    |          |      |          |          |          |              |                           |         |
|----------------------|-----|----|----------|------|----------|----------|----------|--------------|---------------------------|---------|
| <b>Slc7a6os</b>      | 145 | 0  | 2.416782 | 189  | 3.15     | 26.2607  | 22.76944 | Stalled      | chr8:108724339-108736833  | 10.495  |
| <b>Tmem219</b>       | 145 | 0  | 2.416782 | 92   | 1.533333 | 10.2539  | 20.17706 | Stalled      | chr7:134029732-134043792  | 12.061  |
| <b>Med16</b>         | 145 | 0  | 2.416782 | 362  | 6.033333 | 9.88806  | 5.607308 | Stalled      | chr10:79357451-79373683   | 14.233  |
| <b>Cherp</b>         | 145 | 0  | 2.416782 | 832  | 13.86667 | 31.9188  | 7.999962 | Stalled      | chr8:74984381-75001132    | 14.752  |
| <b>Krr1</b>          | 145 | 0  | 2.416782 | 485  | 8.083333 | 5.45229  | 3.568231 | Stalled      | chr10:111407750-111425486 | 15.737  |
| <b>Lztr1</b>         | 145 | 0  | 2.416782 | 258  | 4.3      | 13.1095  | 16.9358  | Stalled      | chr16:17507063-17526423   | 17.361  |
| <b>Atp8b3</b>        | 145 | 0  | 2.416782 | 48   | 0.8      | 0.197496 | 13.93201 | Stalled      | chr10:79982329-80003869   | 19.541  |
| <b>Casp9</b>         | 145 | 0  | 2.416782 | 221  | 3.683333 | 5.96798  | 18.68826 | Stalled      | chr4:141347526-141371890  | 22.365  |
| <b>Zfp385c</b>       | 145 | 0  | 2.416782 | 371  | 6.183333 | 0.088443 | 0.059509 | Stalled      | chr11:100487533-100514007 | 24.475  |
| <b>Ccdc45</b>        | 145 | 0  | 2.416782 | 338  | 5.633333 | 2.73996  | 30.82554 | Stalled      | chr11:106648565-106680174 | 29.61   |
| <b>Ankrd13a</b>      | 145 | 0  | 2.416782 | 519  | 8.65     | 31.9732  | 10.17022 | Stalled      | chr5:115223148-115255829  | 30.682  |
| <b>Gpsm1</b>         | 145 | 0  | 2.416782 | 305  | 5.083333 | 2.81425  | 4.61291  | Stalled      | chr2:26169059-26203755    | 32.697  |
| <b>Gpd1l</b>         | 145 | 0  | 2.416782 | 231  | 3.85     | 9.50116  | 22.5048  | Stalled      | chr9:114808457-114845105  | 34.649  |
| <b>Pold3</b>         | 145 | 0  | 2.416782 | 629  | 10.48333 | 12.1578  | 18.40678 | Stalled      | chr7:107230622-107272010  | 39.389  |
| <b>Yme1l1</b>        | 145 | 0  | 2.416782 | 359  | 5.983333 | 11.6226  | 27.52531 | Stalled      | chr2:23010065-23054156    | 42.092  |
| <b>Crispld2</b>      | 145 | 0  | 2.416782 | 108  | 1.8      | 0.138886 | 1.772748 | Unclassified | chr8:122514369-122576693  | 60.325  |
| <b>Atf7</b>          | 145 | 0  | 2.416782 | 461  | 7.683333 | 2.03364  | 66.0607  | Stalled      | chr15:102367074-102457852 | 88.779  |
| <b>Myh11</b>         | 145 | 0  | 2.416782 | 180  | 3        | 0.242135 | 0        | Unclassified | chr16:14194619-14293501   | 96.883  |
| <b>Glg1</b>          | 145 | 0  | 2.416782 | 557  | 9.283333 | 14.4967  | 52.49264 | Stalled      | chr8:113681457-113785102  | 101.646 |
| <b>Pkrkc</b>         | 145 | 0  | 2.416782 | 498  | 8.3      | 2.81594  | 101.7781 | Stalled      | chr16:15635958-15842332   | 204.375 |
| <b>D17H6S53E</b>     | 144 | 0  | 2.400115 | 0    | 0        | 6.13127  | 40       | Unclassified | chr17:35262059-35264941   | 0.883   |
| <b>Timm13</b>        | 144 | 0  | 2.400115 | 29   | 0.483333 | 69.0093  | 5.329833 | Unclassified | chr10:80362194-80365714   | 1.521   |
| <b>Tctex1d4</b>      | 144 | 0  | 2.400115 | 66   | 1.1      | 0.340752 | 1.661695 | Unclassified | chr4:116797417-116801335  | 1.919   |
| <b>Mrps12</b>        | 144 | 0  | 2.400115 | 12   | 0.2      | 33.8318  | 22.33252 | Stalled      | chr7:29524659-29528800    | 2.142   |
| <b>2410015M20Rik</b> | 144 | 0  | 2.400115 | 78   | 1.3      | 58.9296  | 3.080962 | Stalled      | chr17:56746874-56751194   | 2.321   |
| <b>Amh</b>           | 144 | 0  | 2.400115 | 82   | 1.366667 | 1.39303  | 2.387041 | Stalled      | chr10:80265992-80270393   | 2.402   |
| <b>Rpl27</b>         | 144 | 0  | 2.400115 | 262  | 4.366667 | 75.1576  | 2.875016 | Stalled      | chr11:101301558-101306910 | 3.353   |
| <b>Ankrd57</b>       | 144 | 0  | 2.400115 | 94   | 1.566667 | 10.2296  | 18.5894  | Stalled      | chr10:58682669-58689181   | 4.513   |
| <b>Mrpl18</b>        | 144 | 0  | 2.400115 | 56   | 0.933333 | 65.337   | 24.84157 | Stalled      | chr17:13104220-13110957   | 4.738   |
| <b>Tarbp2</b>        | 144 | 0  | 2.400115 | 252  | 4.2      | 17.5209  | 6.619517 | Stalled      | chr15:102346676-102354107 | 5.432   |
| <b>Atxn7l2</b>       | 144 | 0  | 2.400115 | 135  | 2.25     | 7.49002  | 5.221838 | Stalled      | chr3:108005172-108015852  | 6.861   |
| <b>Fam165b</b>       | 144 | 0  | 2.400115 | 58   | 0.966667 | 11.3026  | 14.99913 | Stalled      | chr16:92299547-92313286   | 11.74   |
| <b>Sars2</b>         | 144 | 0  | 2.400115 | 201  | 3.35     | 15.3881  | 14.00017 | Stalled      | chr7:29525009-29538873    | 11.865  |
| <b>Vars2</b>         | 144 | 0  | 2.400115 | 135  | 2.25     | 8.13856  | 26.5042  | Stalled      | chr17:35792579-35806537   | 11.959  |
| <b>Abcf2</b>         | 144 | 0  | 2.400115 | 259  | 4.316667 | 29.1651  | 10.28099 | Stalled      | chr5:24071162-24085177    | 12.016  |
| <b>Ccdc151</b>       | 144 | 0  | 2.400115 | 27   | 0.45     | 0.641529 | 43.39985 | Stalled      | chr9:21794314-21809078    | 12.765  |
| <b>Man2b1</b>        | 144 | 0  | 2.400115 | 209  | 3.483333 | 19.2075  | 9.713969 | Stalled      | chr8:87605167-87622638    | 15.472  |
| <b>Mfap5</b>         | 144 | 0  | 2.400115 | 293  | 4.883333 | 0.89987  | 0.095009 | Stalled      | chr6:122461693-122479305  | 15.613  |
| <b>Pomt1</b>         | 144 | 0  | 2.400115 | 295  | 4.916667 | 2.59918  | 12.09203 | Stalled      | chr2:32090202-32110525    | 18.324  |
| <b>Cep57</b>         | 144 | 0  | 2.400115 | 291  | 4.85     | 8.35524  | 20.18282 | Stalled      | chr9:13612231-13633537    | 19.307  |
| <b>Ppp2r1a</b>       | 144 | 0  | 2.400115 | 448  | 7.466667 | 48.4813  | 12.19316 | Stalled      | chr17:21080417-21102869   | 20.453  |
| <b>Ctsh</b>          | 144 | 0  | 2.400115 | 670  | 11.16667 | 66.972   | 5.035407 | Stalled      | chr9:89947104-89970933    | 21.83   |
| <b>Cenpo</b>         | 144 | 0  | 2.400115 | 249  | 4.15     | 8.30643  | 32.36121 | Stalled      | chr12:4211671-4236294     | 22.624  |
| <b>Setd1a</b>        | 144 | 0  | 2.400115 | 716  | 11.93333 | 15.1501  | 8.837356 | Stalled      | chr7:134918902-134943633  | 22.732  |
| <b>Ywhag</b>         | 144 | 0  | 2.400115 | 1536 | 25.6     | 56.2471  | 7.281792 | Stalled      | chr5:136384248-136412511  | 26.264  |
| <b>Acad9</b>         | 144 | 0  | 2.400115 | 349  | 5.816667 | 6.29363  | 14.90039 | Stalled      | chr3:35962921-35991779    | 26.859  |
| <b>Eno4</b>          | 144 | 0  | 2.400115 | 28   | 0.466667 | 2.09625  | 119.2864 | Stalled      | chr19:59015914-59045911   | 27.998  |
| <b>Ecd</b>           | 144 | 0  | 2.400115 | 347  | 5.783333 | 17.0587  | 16.02633 | Stalled      | chr14:21139080-21169343   | 28.264  |
| <b>Psen2</b>         | 144 | 0  | 2.400115 | 354  | 5.9      | 16.0612  | 16.50664 | Stalled      | chr1:182157134-182188431  | 29.298  |
| <b>Pik3cg</b>        | 144 | 63 | 2.400115 | 380  | 6.333333 | 4.47166  | 2.397835 | Elongating   | chr12:32858263-32895514   | 35.252  |
| <b>Slc39a14</b>      | 144 | 0  | 2.400115 | 406  | 6.766667 | 3.40748  | 10.26349 | Stalled      | chr14:70703273-70753231   | 47.959  |
| <b>Nsun3</b>         | 144 | 0  | 2.400115 | 304  | 5.066667 | 2.56491  | 49.88184 | Stalled      | chr16:62734677-62788542   | 51.866  |
| <b>Nrxn2</b>         | 144 | 0  | 2.400115 | 233  | 3.883333 | 0.381772 | 1.236086 | Unclassified | chr19:6426015-6533217     | 105.203 |
| <b>Cenpp</b>         | 144 | 0  | 2.400115 | 432  | 7.2      | 5.22732  | 33.01166 | Stalled      | chr13:49559427-49750100   | 188.674 |
| <b>Rpl10a</b>        | 143 | 0  | 2.383448 | 438  | 7.3      | 326.523  | 1.996078 | Stalled      | chr17:28463415-28467978   | 2.564   |
| <b>Hps6</b>          | 143 | 0  | 2.383448 | 29   | 0.483333 | 10.999   | 8.181777 | Stalled      | chr19:46075967-46080663   | 2.697   |
| <b>O610010K14Rik</b> | 143 | 0  | 2.383448 | 23   | 0.383333 | 26.2231  | 24.88587 | Stalled      | chr11:70048709-70053416   | 2.708   |
| <b>Sfrs2</b>         | 143 | 0  | 2.383448 | 236  | 3.933333 | 173.953  | 7.570057 | Stalled      | chr11:116711210-116716408 | 3.199   |
| <b>S1pr1</b>         | 143 | 0  | 2.383448 | 123  | 2.05     | 6.72768  | 3.10789  | Stalled      | chr3:115413356-115419965  | 4.61    |
| <b>Lynx1</b>         | 143 | 0  | 2.383448 | 129  | 2.15     | 8.22568  | 1.890141 | Elongating   | chr15:74578285-74585409   | 5.125   |
| <b>Hdac10</b>        | 143 | 0  | 2.383448 | 58   | 0.966667 | 13.9507  | 9.585692 | Stalled      | chr15:88953733-88961130   | 5.398   |
| <b>Gtf2f1</b>        | 143 | 0  | 2.383448 | 173  | 2.883333 | 64.1107  | 14.43552 | Stalled      | chr17:57142824-57152711   | 7.888   |
| <b>Pigo</b>          | 143 | 0  | 2.383448 | 132  | 2.2      | 8.50035  | 11.97585 | Stalled      | chr4:43030509-43040628    | 8.12    |
| <b>Uchl1</b>         | 143 | 0  | 2.383448 | 97   | 1.616667 | 15.2839  | 11.70947 | Stalled      | chr5:67065359-67078473    | 11.115  |
| <b>Fam33a</b>        | 143 | 0  | 2.383448 | 179  | 2.983333 | 7.35096  | 9.484104 | Stalled      | chr11:86920762-86936476   | 13.715  |
| <b>Rdh11</b>         | 143 | 0  | 2.383448 | 232  | 3.866667 | 21.8841  | 4.322805 | Stalled      | chr12:80276537-80294806   | 16.27   |
| <b>Nol8</b>          | 143 | 0  | 2.383448 | 129  | 2.15     | 5.4224   | 15.7312  | Stalled      | chr13:49746718-49774384   | 25.667  |
| <b>P4ha2</b>         | 143 | 0  | 2.383448 | 64   | 1.066667 | 0.590744 | 2.221078 | Unclassified | chr11:53912425-53945169   | 30.745  |
| <b>Pdgfrb</b>        | 143 | 0  | 2.383448 | 97   | 1.616667 | 0.279424 | 0.572679 | Unclassified | chr18:61202803-61244721   | 39.919  |
| <b>Cbx5</b>          | 143 | 0  | 2.383448 | 551  | 9.183333 | 6.00662  | 37.05767 | Stalled      | chr15:103021976-103072247 | 48.272  |
| <b>Ptpn22</b>        | 143 | 0  | 2.383448 | 503  | 8.383333 | 7.11679  | 7.175008 | Stalled      | chr3:103662214-103716170  | 51.957  |
| <b>Itg3</b>          | 143 | 0  | 2.383448 | 711  | 11.85    | 12.3717  | 6.923415 | Stalled      | chr11:104467313-104531785 | 62.473  |
| <b>Rab3b</b>         | 143 | 0  | 2.383448 | 78   | 1.3      | 0.544201 | 4.478111 | Unclassified | chr4:108549674-108615929  | 64.256  |
| <b>Spen</b>          | 143 | 0  | 2.383448 | 1333 | 22.21667 | 9.59758  | 10.53555 | Stalled      | chr4:141023804-141096512  | 70.709  |
| <b>Vpreb3</b>        | 142 | 0  | 2.36678  | 13   | 0.216667 | 32.7593  | 1.108578 | Unclassified | chr10:75409056-75412391   | 1.336   |
| <b>Cdk5r1</b>        | 142 | 0  | 2.36678  | 107  | 1.783333 | 10.1352  | 4.355155 | Stalled      | chr11:80288547-80294681   | 4.135   |
| <b>Coq10a</b>        | 142 | 0  | 2.36678  | 299  | 4.983333 | 6.27155  | 0.194857 | Stalled      | chr10:127800152-127809093 | 6.942   |
| <b>Rh</b>            | 142 | 0  | 2.36678  | 16   | 0.266667 | 0.021883 | 0        | Unclassified | chr7:150078680-150087871  | 7.192   |
| <b>Tp17l1</b>        | 142 | 0  | 2.36678  | 562  | 9.366667 | 27.6005  | 4.217298 | Stalled      | chr17:46910855-46921605   | 8.751   |
| <b>Slc2a8</b>        | 142 | 0  | 2.36678  | 45   | 0.75     | 2.81765  | 5.929846 | Stalled      | chr2:32828508-32839576    | 9.069   |
| <b>Sox10</b>         | 142 | 0  | 2.36678  | 54   | 0.9      | 0.070887 | 0.822462 | Unclassified | chr15:78985343-78996920   | 9.578   |
| <b>Mbd1</b>          | 142 | 0  | 2.36678  | 484  | 8.066667 | 19.9349  | 4.767703 | Stalled      | chr18:74425941-74442338   | 14.398  |
| <b>Trim35</b>        | 142 | 0  | 2.36678  | 564  | 9.4      | 26.6651  | 9.446134 | Stalled      | chr14:66913861-66930261   | 14.401  |
| <b>Slc4a9</b>        | 142 | 0  | 2.36678  | 42   | 0.7      | 0.073982 | 0.807094 | Unclassified | chr18:36685805-36704262   | 16.458  |
| <b>Dnajb11</b>       | 142 | 0  | 2.36678  | 495  | 8.25     | 50.4245  | 10.8326  | Stalled      | chr16:22855938-22879707   | 21.77   |
| <b>Bcl6</b>          | 142 | 0  | 2.36678  | 577  | 9.616667 | 6.89975  | 5.757513 | Stalled      | chr16:23965137-23990698   | 23.562  |



|                      |     |    |          |      |          |          |          |              |                           |         |
|----------------------|-----|----|----------|------|----------|----------|----------|--------------|---------------------------|---------|
| <b>2010002M12Rik</b> | 142 | 0  | 2.36678  | 43   | 0.716667 | 1.00446  | 30.05416 | Stalled      | chr19:34691540-34717233   | 23.694  |
| <b>Etfdh</b>         | 142 | 0  | 2.36678  | 104  | 1.733333 | 10.7301  | 31.85449 | Stalled      | chr3:79407709-79434689    | 24.981  |
| <b>Pak6</b>          | 142 | 0  | 2.36678  | 85   | 1.416667 | 0.526652 | 3.670618 | Unclassified | chr2:118487312-118523754  | 34.443  |
| <b>Rilpl1</b>        | 142 | 0  | 2.36678  | 274  | 4.566667 | 3.58336  | 4.554561 | Stalled      | chr5:124943088-124983400  | 38.313  |
| <b>Ankmy2</b>        | 142 | 0  | 2.36678  | 198  | 3.3      | 8.34222  | 46.07748 | Stalled      | chr12:36881710-36923878   | 40.169  |
| <b>Asap3</b>         | 142 | 0  | 2.36678  | 88   | 1.466667 | 0.78734  | 9.246915 | Stalled      | chr4:135760279-135802488  | 40.21   |
| <b>Ret</b>           | 142 | 0  | 2.36678  | 51   | 0.85     | 0.253687 | 2.343695 | Unclassified | chr6:118101765-118149762  | 45.998  |
| <b>Sned1</b>         | 142 | 0  | 2.36678  | 144  | 2.4      | 0.177527 | 4.388513 | Unclassified | chr1:95130473-95193025    | 60.553  |
| <b>Mthfd1</b>        | 142 | 0  | 2.36678  | 777  | 12.95    | 23.1658  | 15.5081  | Stalled      | chr12:77354218-77420807   | 64.59   |
| <b>Arl6ip4</b>       | 141 | 0  | 2.350113 | 98   | 1.633333 | 89.3849  | 2.439807 | Stalled      | chr5:124564116-124568204  | 2.089   |
| <b>Atp6v1g2</b>      | 141 | 0  | 2.350113 | 10   | 0.166667 | 1.31228  | 8.81876  | Stalled      | chr17:35371540-35375712   | 2.173   |
| <b>Taba1b</b>        | 141 | 0  | 2.350113 | 41   | 0.683333 | 0        | 28.71137 | Stalled      | chr15:98761861-98766821   | 2.961   |
| <b>Lcn8</b>          | 141 | 0  | 2.350113 | 9    | 0.15     | 0        | 0.189189 | Unclassified | chr2:25506637-25511736    | 3.1     |
| <b>Gm129</b>         | 141 | 0  | 2.350113 | 33   | 0.55     | 2.09299  | 6.864941 | Stalled      | chr3:95682427-95688151    | 3.725   |
| <b>Nip7</b>          | 141 | 0  | 2.350113 | 115  | 1.916667 | 11.5023  | 10.07946 | Stalled      | chr8:109578776-109584826  | 4.051   |
| <b>Gcc1</b>          | 141 | 0  | 2.350113 | 51   | 0.85     | 7.20587  | 8.676378 | Stalled      | chr6:28366602-28373724    | 5.123   |
| <b>Pnpo</b>          | 141 | 0  | 2.350113 | 51   | 0.85     | 13.8153  | 15.28022 | Stalled      | chr11:96799129-96807333   | 6.205   |
| <b>Taco1</b>         | 141 | 0  | 2.350113 | 57   | 0.95     | 16.214   | 24.89806 | Stalled      | chr11:105925420-105934926 | 7.507   |
| <b>E2f4</b>          | 141 | 0  | 2.350113 | 283  | 4.716667 | 56.5131  | 5.141014 | Stalled      | chr8:107819562-107829270  | 7.709   |
| <b>B9d1</b>          | 141 | 0  | 2.350113 | 23   | 0.383333 | 3.00363  | 7.947542 | Stalled      | chr11:61316673-61326429   | 7.757   |
| <b>Mcat</b>          | 141 | 0  | 2.350113 | 130  | 2.166667 | 9.36813  | 13.71794 | Stalled      | chr15:83377226-83388141   | 8.916   |
| <b>Ssrp1</b>         | 141 | 0  | 2.350113 | 489  | 8.15     | 83.017   | 5.047446 | Stalled      | chr2:84875357-84887268    | 9.912   |
| <b>B4galnt4</b>      | 141 | 0  | 2.350113 | 29   | 0.483333 | 0.280565 | 1.013926 | Unclassified | chr7:148245172-148258018  | 10.847  |
| <b>Psma1</b>         | 141 | 0  | 2.350113 | 111  | 1.85     | 40.4143  | 17.82081 | Stalled      | chr7:121408063-121421630  | 11.568  |
| <b>Cdnf</b>          | 141 | 0  | 2.350113 | 21   | 0.35     | 1.81998  | 142.302  | Stalled      | chr2:3428336-3443648      | 13.313  |
| <b>Ramp3</b>         | 141 | 0  | 2.350113 | 38   | 0.633333 | 0.39331  | 0.320749 | Unclassified | chr11:6556535-6577478     | 18.944  |
| <b>Tmprss9</b>       | 141 | 0  | 2.350113 | 308  | 5.133333 | 0.085353 | 0.171544 | Stalled      | chr10:80340560-80362239   | 19.68   |
| <b>Alkbh5</b>        | 141 | 0  | 2.350113 | 236  | 3.933333 | 19.0299  | 29.9987  | Stalled      | chr11:60349184-60372014   | 20.831  |
| <b>Trf</b>           | 141 | 0  | 2.350113 | 35   | 0.583333 | 0.296776 | 0        | Unclassified | chr9:103111205-103134616  | 21.412  |
| <b>Eed</b>           | 141 | 0  | 2.350113 | 448  | 7.466667 | 33.6489  | 28.99834 | Stalled      | chr7:97103163-97131486    | 26.324  |
| <b>Kcnh2</b>         | 141 | 0  | 2.350113 | 78   | 1.3      | 0.420359 | 0.853546 | Unclassified | chr5:23825406-23859422    | 32.017  |
| <b>Ints10</b>        | 141 | 0  | 2.350113 | 182  | 3.033333 | 9.21413  | 16.59786 | Stalled      | chr8:71315852-71351543    | 33.692  |
| <b>Gpbp11</b>        | 141 | 38 | 2.350113 | 247  | 4.116667 | 12.6044  | 39.12466 | Stalled      | chr4:116228331-116266487  | 36.157  |
| <b>Gltd2</b>         | 141 | 0  | 2.350113 | 201  | 3.35     | 0.077386 | 0.326527 | Unclassified | chr10:82113177-82155395   | 40.219  |
| <b>Prmt7</b>         | 141 | 0  | 2.350113 | 622  | 10.36667 | 13.6561  | 28.39951 | Stalled      | chr8:108732953-108775594  | 40.642  |
| <b>Psen1</b>         | 141 | 0  | 2.350113 | 751  | 12.51667 | 18.3457  | 22.68615 | Stalled      | chr12:85027512-85076149   | 46.638  |
| <b>Rbl2</b>          | 141 | 0  | 2.350113 | 301  | 5.016667 | 6.57897  | 12.5262  | Stalled      | chr8:93591992-93647743    | 53.752  |
| <b>Ptch1</b>         | 141 | 0  | 2.350113 | 1858 | 30.96667 | 10.4957  | 5.656629 | Stalled      | chr13:63612840-63668828   | 53.989  |
| <b>Trim2</b>         | 141 | 0  | 2.350113 | 85   | 1.416667 | 0.592317 | 1.622461 | Unclassified | chr3:83965795-84026799    | 59.005  |
| <b>Gak</b>           | 141 | 0  | 2.350113 | 864  | 14.4     | 19.4419  | 25.38014 | Stalled      | chr5:108998432-109060758  | 60.327  |
| <b>Glb1</b>          | 141 | 0  | 2.350113 | 1048 | 17.46667 | 14.6717  | 19.28636 | Stalled      | chr9:114308236-114383495  | 73.26   |
| <b>9030425E11Rik</b> | 141 | 0  | 2.350113 | 391  | 6.516667 | 0.765498 | 0.596725 | Unclassified | chr9:40492046-40592129    | 98.084  |
| <b>Rnf216</b>        | 141 | 0  | 2.350113 | 1332 | 22.2     | 10.5694  | 16.25149 | Stalled      | chr5:143752571-143876673  | 122.103 |
| <b>Macf1</b>         | 141 | 0  | 2.350113 | 2807 | 46.78333 | 13.0644  | 0.106235 | Stalled      | chr4:123026958-123363603  | 334.646 |
| <b>Mrpl43</b>        | 140 | 0  | 2.333445 | 5    | 0.083333 | 51.5468  | 26.29098 | Unclassified | chr19:45079503-45082932   | 1.43    |
| <b>Ptger1</b>        | 140 | 0  | 2.333445 | 166  | 2.766667 | 29.7516  | 1.141305 | Elongating   | chr8:86188538-86194002    | 3.465   |
| <b>9130023H24Rik</b> | 140 | 0  | 2.333445 | 63   | 1.05     | 1.95467  | 16.77186 | Stalled      | chr7:13537964-135383545   | 3.582   |
| <b>Gng8</b>          | 140 | 0  | 2.333445 | 14   | 0.233333 | 4.47024  | 1.751306 | Unclassified | chr7:17475134-17480784    | 3.651   |
| <b>Vamp2</b>         | 140 | 0  | 2.333445 | 123  | 2.05     | 18.2636  | 4.763816 | Stalled      | chr11:68900029-68905883   | 3.855   |
| <b>Fitm2</b>         | 140 | 0  | 2.333445 | 25   | 0.416667 | 4.24822  | 18.1375  | Stalled      | chr2:163294438-163300365  | 3.928   |
| <b>Ldhd</b>          | 140 | 0  | 2.333445 | 35   | 0.583333 | 0.265284 | 4.252201 | Stalled      | chr8:114150170-114156222  | 4.053   |
| <b>Nab2</b>          | 140 | 0  | 2.333445 | 170  | 2.833333 | 10.3442  | 3.204352 | Stalled      | chr10:127097973-127105759 | 5.787   |
| <b>Bhlhe40</b>       | 140 | 0  | 2.333445 | 132  | 2.2      | 10.7425  | 8.064808 | Stalled      | chr6:108608622-108616919  | 6.298   |
| <b>Parp3</b>         | 140 | 0  | 2.333445 | 58   | 0.966667 | 9.22662  | 2.009479 | Elongating   | chr9:106372683-106380982  | 6.3     |
| <b>Angpt4</b>        | 140 | 0  | 2.333445 | 39   | 0.65     | 1.5764   | 14.35643 | Stalled      | chr17:33911845-33920520   | 6.676   |
| <b>Gemin4</b>        | 140 | 0  | 2.333445 | 263  | 4.383333 | 5.76316  | 7.408824 | Stalled      | chr11:76024072-76033074   | 7.003   |
| <b>Pts</b>           | 140 | 0  | 2.333445 | 86   | 1.433333 | 7.85382  | 14.66785 | Stalled      | chr9:50329721-50338746    | 7.026   |
| <b>Ddx51</b>         | 140 | 0  | 2.333445 | 219  | 3.65     | 5.87194  | 8.302812 | Stalled      | chr5:111080469-111089515  | 7.047   |
| <b>Taf1c</b>         | 140 | 0  | 2.333445 | 175  | 2.916667 | 7.97228  | 5.56716  | Stalled      | chr8:122121873-122131140  | 7.268   |
| <b>Ceacam16</b>      | 140 | 0  | 2.333445 | 51   | 0.85     | 10.0312  | 0.692859 | Unclassified | chr7:20437445-20448648    | 9.204   |
| <b>Cidec</b>         | 140 | 0  | 2.333445 | 37   | 0.616667 | 0.075284 | 0.429575 | Unclassified | chr6:113374629-113387749  | 11.121  |
| <b>Pcyox1</b>        | 140 | 0  | 2.333445 | 48   | 0.8      | 3.80177  | 28.61665 | Stalled      | chr6:86335999-86349144    | 11.146  |
| <b>Smndc1</b>        | 140 | 0  | 2.333445 | 299  | 4.983333 | 13.0852  | 16.84628 | Stalled      | chr19:53453703-53467063   | 11.361  |
| <b>Silp</b>          | 140 | 0  | 2.333445 | 391  | 6.516667 | 34.5068  | 14.3145  | Stalled      | chr5:33982710-33996955    | 12.246  |
| <b>Vasp</b>          | 140 | 0  | 2.333445 | 507  | 8.45     | 57.4838  | 7.458553 | Stalled      | chr7:19842278-19859203    | 14.926  |
| <b>4930451C15Rik</b> | 140 | 0  | 2.333445 | 63   | 1.05     | 0.098875 | 0.40069  | Unclassified | chr16:17544557-17563340   | 16.784  |
| <b>Jmj5</b>          | 140 | 0  | 2.333445 | 276  | 4.6      | 5.20065  | 18.02563 | Stalled      | chr7:132586189-132605773  | 17.585  |
| <b>Isy1</b>          | 140 | 0  | 2.333445 | 258  | 4.3      | 39.763   | 31.3395  | Stalled      | chr6:87768441-87790753    | 20.313  |
| <b>Hmgcr</b>         | 140 | 0  | 2.333445 | 1247 | 20.78333 | 44.4198  | 8.419546 | Stalled      | chr13:97418918-97442891   | 21.974  |
| <b>Ptpn23</b>        | 140 | 0  | 2.333445 | 663  | 11.05    | 13.6215  | 7.685151 | Stalled      | chr9:110287592-110312714  | 23.123  |
| <b>Dcaf12</b>        | 140 | 0  | 2.333445 | 247  | 4.116667 | 8.6247   | 18.44438 | Stalled      | chr4:41238332-41263934    | 23.603  |
| <b>Tdp1</b>          | 140 | 0  | 2.333445 | 580  | 9.666667 | 13.1888  | 26.17739 | Stalled      | chr12:101120724-101193426 | 70.703  |
| <b>Arfp1</b>         | 140 | 0  | 2.333445 | 316  | 5.266667 | 5.14294  | 23.65131 | Stalled      | chr3:84299985-84388547    | 86.563  |
| <b>Ttc39b</b>        | 140 | 0  | 2.333445 | 807  | 13.45    | 1.50097  | 17.41426 | Stalled      | chr4:82866204-82972093    | 103.89  |
| <b>Cables1</b>       | 140 | 0  | 2.333445 | 204  | 3.4      | 1.29908  | 2.383944 | Unclassified | chr18:11995782-12104136   | 106.355 |
| <b>Znhit2</b>        | 139 | 0  | 2.316778 | 66   | 1.1      | 30.9677  | 1.496325 | Unclassified | chr19:6059206-6062468     | 1.263   |
| <b>Phpt1</b>         | 139 | 0  | 2.316778 | 8    | 0.133333 | 38.267   | 11.98981 | Unclassified | chr2:25428950-25432391    | 1.442   |
| <b>Pthr1</b>         | 139 | 0  | 2.316778 | 4    | 0.066667 | 5.38415  | 11.99749 | Unclassified | chr2:32629340-32633113    | 1.774   |
| <b>09-002_145561</b> | 139 | 0  | 2.316778 | 898  | 14.96667 | ND       | ND       | Stalled      | chr11:106360995-106362995 | 2.001   |
| <b>Rps27a</b>        | 139 | 0  | 2.316778 | 106  | 1.766667 | 72.1121  | 4.432836 | Stalled      | chr11:29445841-29450040   | 2.2     |
| <b>Zfp830</b>        | 139 | 0  | 2.316778 | 21   | 0.35     | 17.8924  | 36.90807 | Stalled      | chr11:82575846-82581124   | 3.279   |
| <b>2810408A11Rik</b> | 139 | 0  | 2.316778 | 16   | 0.266667 | 3.33785  | 26.11648 | Stalled      | chr11:69710859-69716488   | 3.63    |
| <b>Galk1</b>         | 139 | 0  | 2.316778 | 153  | 2.55     | 69.9569  | 3.571308 | Stalled      | chr11:115869670-115876033 | 4.364   |
| <b>Avpi1</b>         | 139 | 0  | 2.316778 | 123  | 2.05     | 8.69085  | 4.065142 | Stalled      | chr19:42197764-42205483   | 5.72    |
| <b>Tnfrsf14</b>      | 139 | 0  | 2.316778 | 104  | 1.733333 | 9.77251  | 2.370344 | Elongating   | chr4:154296318-154304186  | 5.869   |
| <b>Guca1a</b>        | 139 | 0  | 2.316778 | 27   | 0.45     | 3.08256  | 0        | Unclassified | chr17:47531506-47539533   | 6.028   |

|                      |     |    |          |      |          |          |          |              |                           |         |
|----------------------|-----|----|----------|------|----------|----------|----------|--------------|---------------------------|---------|
| <b>3110001I22Rik</b> | 139 | 0  | 2.316778 | 76   | 1.266667 | 0        | 21.63501 | Stalled      | chr16:13670112-13678478   | 6.367   |
| <b>1700088E04Rik</b> | 139 | 0  | 2.316778 | 93   | 1.55     | 2.52366  | 10.39001 | Stalled      | chr15:78965084-78973681   | 6.598   |
| <b>Pigm</b>          | 139 | 0  | 2.316778 | 109  | 1.816667 | 5.10279  | 18.81691 | Stalled      | chr1:174304661-174314230  | 7.57    |
| <b>Prpf38b</b>       | 139 | 0  | 2.316778 | 243  | 4.05     | 46.5604  | 18.44891 | Stalled      | chr3:108705724-108716622  | 8.899   |
| <b>Bcl10</b>         | 139 | 0  | 2.316778 | 206  | 3.433333 | 18.2498  | 20.14268 | Stalled      | chr3:145585341-145597247  | 9.907   |
| <b>Adam15</b>        | 139 | 0  | 2.316778 | 25   | 0.416667 | 2.77891  | 21.26778 | Stalled      | chr3:89143561-89155932    | 10.372  |
| <b>Mtap1s</b>        | 139 | 0  | 2.316778 | 310  | 5.166667 | 14.5174  | 9.353057 | Stalled      | chr8:73427872-73441428    | 11.557  |
| <b>Rab33b</b>        | 139 | 0  | 2.316778 | 97   | 1.616667 | 3.53189  | 54.03296 | Stalled      | chr3:51285887-51300134    | 12.248  |
| <b>Oasl1</b>         | 139 | 49 | 2.316778 | 2976 | 49.6     | 31.2695  | 1.98486  | Elongating   | chr5:115371248-115387920  | 14.673  |
| <b>2610301G19Rik</b> | 139 | 0  | 2.316778 | 563  | 9.383333 | 21.1336  | 3.820905 | Stalled      | chr14:70537983-70555598   | 15.616  |
| <b>Stac2</b>         | 139 | 0  | 2.316778 | 379  | 6.316667 | 15.8233  | 3.730929 | Stalled      | chr11:97897937-97916776   | 16.84   |
| <b>Zfp788</b>        | 139 | 0  | 2.316778 | 95   | 1.583333 | 1.994    | 23.3785  | Stalled      | chr7:48886900-48906902    | 18.003  |
| <b>Plekhh1</b>       | 139 | 0  | 2.316778 | 183  | 3.05     | 0.074658 | 0.349091 | Stalled      | chr7:107792411-107812908  | 18.498  |
| <b>Ap3m1</b>         | 139 | 0  | 2.316778 | 152  | 2.533333 | 6.48024  | 40.05388 | Stalled      | chr14:21852964-21873664   | 18.701  |
| <b>Pigb</b>          | 139 | 0  | 2.316778 | 113  | 1.883333 | 3.35062  | 38.90408 | Stalled      | chr9:72863502-72889506    | 24.005  |
| <b>G3bp1</b>         | 139 | 0  | 2.316778 | 1438 | 23.96667 | 65.3598  | 8.026204 | Stalled      | chr11:55281253-55314389   | 31.137  |
| <b>Amn1</b>          | 139 | 0  | 2.316778 | 193  | 3.216667 | 4.04228  | 42.67913 | Stalled      | chr6:149106098-149139234  | 31.137  |
| <b>Canx</b>          | 139 | 0  | 2.316778 | 735  | 12.25    | 56.4012  | 25.79497 | Stalled      | chr11:50107458-50141175   | 31.718  |
| <b>Bfar</b>          | 139 | 0  | 2.316778 | 380  | 6.333333 | 7.83487  | 23.20615 | Stalled      | chr16:13669958-13703705   | 31.748  |
| <b>Casc1</b>         | 139 | 0  | 2.316778 | 661  | 11.01667 | 0.953353 | 13.11019 | Stalled      | chr6:145123391-145161490  | 36.1    |
| <b>Cars2</b>         | 139 | 0  | 2.316778 | 514  | 8.566667 | 11.1298  | 19.44689 | Stalled      | chr8:11514016-11552771    | 36.756  |
| <b>Tmem44</b>        | 139 | 0  | 2.316778 | 92   | 1.533333 | 0.596507 | 2.617267 | Unclassified | chr16:30511940-30552664   | 38.725  |
| <b>Pdss1</b>         | 139 | 0  | 2.316778 | 488  | 8.133333 | 3.97219  | 28.62527 | Stalled      | chr2:22749041-22795779    | 44.739  |
| <b>Cct6b</b>         | 139 | 53 | 2.316778 | 95   | 1.583333 | 2.1791   | 120.3644 | Stalled      | chr11:82532750-82579790   | 45.041  |
| <b>Twist2</b>        | 139 | 0  | 2.316778 | 71   | 1.183333 | 0.205139 | 1.17249  | Unclassified | chr1:93696053-93744604    | 46.552  |
| <b>B3gnt1l</b>       | 139 | 0  | 2.316778 | 539  | 8.983333 | 3.69212  | 30.56052 | Stalled      | chr11:121477522-121536465 | 56.944  |
| <b>Mettl8</b>        | 139 | 0  | 2.316778 | 242  | 4.033333 | 6.01682  | 119.8629 | Stalled      | chr2:70802619-70895663    | 91.045  |
| <b>Rab30</b>         | 139 | 0  | 2.316778 | 357  | 5.95     | 6.21787  | 26.35113 | Stalled      | chr7:99888223-99985627    | 95.405  |
| <b>Tsga10</b>        | 139 | 0  | 2.316778 | 88   | 1.466667 | 0.116855 | 95.84027 | Stalled      | chr1:37811620-37923924    | 110.305 |
| <b>Fahd1</b>         | 138 | 0  | 2.30011  | 2    | 0.033333 | 25.624   | 48.45847 | Unclassified | chr17:24985840-24989247   | 1.408   |
| <b>Chkb</b>          | 138 | 0  | 2.30011  | 45   | 0.75     | 0        | 21.00383 | Stalled      | chr15:89256797-89262330   | 3.534   |
| <b>Gpr44</b>         | 138 | 0  | 2.30011  | 221  | 3.683333 | 0.193422 | 0.077265 | Stalled      | chr19:11009649-11017001   | 5.353   |
| <b>Mlst8</b>         | 138 | 0  | 2.30011  | 329  | 5.483333 | 5.83435  | 3.366866 | Stalled      | chr17:24610496-24618023   | 5.528   |
| <b>Srpr</b>          | 138 | 0  | 2.30011  | 179  | 2.983333 | 23.2771  | 12.98459 | Stalled      | chr9:35016787-35024588    | 5.802   |
| <b>Islr2</b>         | 138 | 0  | 2.30011  | 25   | 0.416667 | 0.583369 | 0.831805 | Unclassified | chr9:58044104-58052092    | 5.989   |
| <b>Rad9</b>          | 138 | 0  | 2.30011  | 394  | 6.566667 | 13.9306  | 2.342    | Elongating   | chr19:4195197-4203603     | 6.407   |
| <b>Foxred1</b>       | 138 | 0  | 2.30011  | 143  | 2.383333 | 13.1053  | 19.10876 | Stalled      | chr9:35011805-35020510    | 6.706   |
| <b>M6pr</b>          | 138 | 0  | 2.30011  | 113  | 1.883333 | 56.723   | 10.67708 | Stalled      | chr6:122257027-122267695  | 8.669   |
| <b>Tmem80</b>        | 138 | 0  | 2.30011  | 86   | 1.433333 | 4.90178  | 24.24482 | Stalled      | chr7:148512028-148523054  | 9.027   |
| <b>Ifit1</b>         | 138 | 0  | 2.30011  | 65   | 1.083333 | 3.67359  | 9.774569 | Stalled      | chr19:34713378-34724499   | 9.122   |
| <b>Snrpa</b>         | 138 | 0  | 2.30011  | 413  | 6.883333 | 50.5912  | 7.319802 | Stalled      | chr7:27972024-27983290    | 9.267   |
| <b>Npm1</b>          | 138 | 0  | 2.30011  | 426  | 7.1      | 158.836  | 11.42009 | Stalled      | chr11:33052510-33065056   | 10.547  |
| <b>St6galnac4</b>    | 138 | 0  | 2.30011  | 1127 | 18.78333 | 16.4625  | 3.356963 | Stalled      | chr2:32441009-32455994    | 12.986  |
| <b>Hagh</b>          | 138 | 0  | 2.30011  | 71   | 1.183333 | 8.85086  | 36.73749 | Stalled      | chr17:24985434-25001393   | 13.96   |
| <b>Mtch1</b>         | 138 | 0  | 2.30011  | 583  | 9.716667 | 66.4174  | 5.755081 | Stalled      | chr17:29469020-29486849   | 15.83   |
| <b>Zfp790</b>        | 138 | 0  | 2.30011  | 180  | 3        | 4.76668  | 8.98449  | Stalled      | chr7:30599090-30617061    | 15.972  |
| <b>Cod9</b>          | 138 | 0  | 2.30011  | 157  | 2.616667 | 14.8969  | 46.22101 | Stalled      | chr8:97360316-97378795    | 16.48   |
| <b>Tmem175</b>       | 138 | 0  | 2.30011  | 154  | 2.566667 | 4.58954  | 38.69386 | Stalled      | chr5:109056828-109076789  | 17.962  |
| <b>Ciapin1</b>       | 138 | 0  | 2.30011  | 327  | 5.45     | 6.21189  | 25.53254 | Stalled      | chr8:97343718-97364240    | 18.523  |
| <b>Onecut3</b>       | 138 | 0  | 2.30011  | 53   | 0.883333 | 0.162381 | 0.574426 | Unclassified | chr10:79955650-79980005   | 22.356  |
| <b>Apobec1</b>       | 138 | 0  | 2.30011  | 1393 | 23.21667 | 24.889   | 3.055568 | Stalled      | chr6:122527809-122554462  | 24.654  |
| <b>Dlg4</b>          | 138 | 0  | 2.30011  | 77   | 1.283333 | 0.730157 | 3.778564 | Unclassified | chr11:69830106-69859033   | 26.928  |
| <b>Tmem206</b>       | 138 | 0  | 2.30011  | 594  | 9.9      | 2.90988  | 13.06555 | Stalled      | chr1:193147843-193176804  | 26.962  |
| <b>Eif3a</b>         | 138 | 0  | 2.30011  | 830  | 13.83333 | 73.8594  | 20.37127 | Stalled      | chr19:60837018-60868596   | 29.579  |
| <b>Gm6498</b>        | 138 | 0  | 2.30011  | 27   | 0.45     | 0.3727   | 0.515252 | Unclassified | chr14:48816390-48848088   | 29.699  |
| <b>Chdh</b>          | 138 | 0  | 2.30011  | 61   | 1.016667 | 0.05399  | 0.6662   | Unclassified | chr14:30820185-30853652   | 31.468  |
| <b>Sp97</b>          | 138 | 0  | 2.30011  | 407  | 6.783333 | 13.7496  | 32.79604 | Stalled      | chr8:125587407-125621651  | 32.245  |
| <b>Galns</b>         | 138 | 0  | 2.30011  | 992  | 16.53333 | 14.3385  | 10.65909 | Stalled      | chr8:125102136-125137241  | 33.106  |
| <b>Dgcr8</b>         | 138 | 0  | 2.30011  | 1024 | 17.06667 | 8.99756  | 13.67288 | Stalled      | chr16:18254057-18291261   | 35.205  |
| <b>Hadha</b>         | 138 | 0  | 2.30011  | 372  | 6.2      | 21.4798  | 32.64315 | Stalled      | chr5:30444843-30483520    | 36.678  |
| <b>Dnmt1</b>         | 138 | 0  | 2.30011  | 2158 | 35.96667 | 51.6089  | 7.847646 | Stalled      | chr9:20711652-20759317    | 45.666  |
| <b>Mbtps1</b>        | 138 | 0  | 2.30011  | 1157 | 19.28333 | 13.6089  | 12.08763 | Stalled      | chr8:122032053-122084661  | 50.609  |
| <b>Pank1</b>         | 138 | 0  | 2.30011  | 392  | 6.533333 | 3.81362  | 13.81948 | Stalled      | chr19:34885383-34955945   | 68.563  |
| <b>Unc5b</b>         | 138 | 0  | 2.30011  | 145  | 2.416667 | 0.248909 | 1.276842 | Unclassified | chr10:60225342-60296329   | 68.988  |
| <b>Peli2</b>         | 138 | 0  | 2.30011  | 146  | 2.433333 | 0.117151 | 0.487748 | Unclassified | chr14:48738543-48880558   | 140.016 |
| <b>Ncor1</b>         | 138 | 0  | 2.30011  | 1265 | 21.08333 | 14.6793  | 47.4214  | Stalled      | chr11:62130191-62272834   | 140.644 |
| <b>Ston2</b>         | 138 | 0  | 2.30011  | 252  | 4.2      | 0.143696 | 0        | Unclassified | chr12:92871449-93026876   | 153.428 |
| <b>Ppdpf</b>         | 137 | 0  | 2.283443 | 1    | 0.016667 | 34.867   | 18.64058 | Unclassified | chr2:180920047-180923209  | 1.163   |
| <b>B3galt4</b>       | 137 | 0  | 2.283443 | 70   | 1.166667 | 6.94658  | 6.969282 | Unclassified | chr17:34086856-34090433   | 1.578   |
| <b>Plekhl1</b>       | 137 | 0  | 2.283443 | 132  | 2.2      | 48.0318  | 7.752121 | Stalled      | chr10:80258843-80263371   | 2.529   |
| <b>Bloc1s1</b>       | 137 | 0  | 2.283443 | 36   | 0.6      | 39.4757  | 10.82358 | Stalled      | chr10:128356969-128362580 | 3.612   |
| <b>Fis1</b>          | 137 | 0  | 2.283443 | 117  | 1.95     | 96.1271  | 3.91482  | Stalled      | chr5:137435946-137442102  | 4.157   |
| <b>Tymp</b>          | 137 | 0  | 2.283443 | 651  | 10.85    | 0        | 0.050166 | Stalled      | chr15:89202361-89209468   | 5.108   |
| <b>H1foo</b>         | 137 | 0  | 2.283443 | 34   | 0.566667 | 0.172572 | 0.673073 | Unclassified | chr6:115892956-115900251  | 5.296   |
| <b>Ar12</b>          | 137 | 0  | 2.283443 | 48   | 0.8      | 15.07    | 25.13953 | Stalled      | chr19:6134388-6143137     | 6.75    |
| <b>Cnbp</b>          | 137 | 0  | 2.283443 | 489  | 8.15     | 99.4287  | 9.221123 | Stalled      | chr6:87792608-87803100    | 8.493   |
| <b>Osgin1</b>        | 137 | 0  | 2.283443 | 177  | 2.95     | 1.99935  | 5.554912 | Stalled      | chr8:121959061-121970156  | 9.096   |
| <b>Lzic</b>          | 137 | 0  | 2.283443 | 176  | 2.933333 | 20.7164  | 9.318908 | Stalled      | chr4:148857441-148870776  | 11.336  |
| <b>Ndufs2</b>        | 137 | 0  | 2.283443 | 172  | 2.866667 | 71.1441  | 11.17699 | Stalled      | chr1:173164990-173179243  | 12.254  |
| <b>Tut1</b>          | 137 | 0  | 2.283443 | 288  | 4.8      | 19.1824  | 9.868053 | Stalled      | chr19:9026339-9040700     | 12.362  |
| <b>Dtx3l</b>         | 137 | 0  | 2.283443 | 187  | 3.116667 | 8.12091  | 13.57222 | Stalled      | chr16:35926600-35941113   | 12.514  |
| <b>Prdx1</b>         | 137 | 0  | 2.283443 | 402  | 6.7      | 59.1461  | 18.13296 | Stalled      | chr4:116356203-116372605  | 14.403  |
| <b>Cnot8</b>         | 137 | 43 | 2.283443 | 281  | 4.683333 | 15.9124  | 15.79687 | Stalled      | chr11:57915654-57932096   | 14.443  |
| <b>Nmnat1</b>        | 137 | 0  | 2.283443 | 91   | 1.516667 | 4.28517  | 23.68013 | Stalled      | chr4:148842895-148861251  | 16.357  |
| <b>Clk4</b>          | 137 | 0  | 2.283443 | 316  | 5.266667 | 12.5642  | 22.73249 | Stalled      | chr11:51074672-51095266   | 18.595  |
| <b>Lman2</b>         | 137 | 0  | 2.283443 | 1159 | 19.31667 | 44.8492  | 3.797987 | Stalled      | chr13:55445193-55466144   | 18.952  |

|                      |     |    |          |      |          |          |          |              |                           |         |
|----------------------|-----|----|----------|------|----------|----------|----------|--------------|---------------------------|---------|
| <b>Pisma6</b>        | 137 | 0  | 2.283443 | 242  | 4.033333 | 77.0472  | 22.95215 | Stalled      | chr12:56497811-56519446   | 19.636  |
| <b>Cenpn</b>         | 137 | 0  | 2.283443 | 294  | 4.9      | 5.62406  | 23.33888 | Stalled      | chr8:119443639-119465403  | 19.765  |
| <b>Gprc5c</b>        | 137 | 0  | 2.283443 | 30   | 0.5      | 0.474459 | 1.203127 | Unclassified | chr11:114710845-114733931 | 21.087  |
| <b>Atic</b>          | 137 | 0  | 2.283443 | 484  | 8.066667 | 41.7844  | 15.39268 | Stalled      | chr1:71601729-71625977    | 22.249  |
| <b>Fh1</b>           | 137 | 0  | 2.283443 | 262  | 4.366667 | 42.062   | 21.9307  | Stalled      | chr1:177531511-177557766  | 24.256  |
| <b>Ccdc69</b>        | 137 | 0  | 2.283443 | 223  | 3.716667 | 5.80679  | 15.86403 | Stalled      | chr11:54863239-54893633   | 28.395  |
| <b>Lactb2</b>        | 137 | 0  | 2.283443 | 520  | 8.666667 | 8.93674  | 23.67846 | Stalled      | chr1:13615979-13652590    | 34.612  |
| <b>Lrsam1</b>        | 137 | 0  | 2.283443 | 150  | 2.5      | 1.15029  | 32.94408 | Stalled      | chr2:32780739-32818771    | 36.033  |
| <b>Tanf2</b>         | 137 | 0  | 2.283443 | 143  | 2.383333 | 0.21935  | 0.654187 | Unclassified | chr2:143856837-143899715  | 40.879  |
| <b>Tbccd1</b>        | 137 | 0  | 2.283443 | 238  | 3.966667 | 4.99915  | 36.2127  | Stalled      | chr16:22813287-22859642   | 44.356  |
| <b>Ttll9</b>         | 137 | 0  | 2.283443 | 291  | 4.85     | 1.088    | 2.00889  | Stalled      | chr2:152786220-152834218  | 45.999  |
| <b>Col16a1</b>       | 137 | 0  | 2.283443 | 94   | 1.566667 | 0.034472 | 0        | Unclassified | chr4:129723083-129776520  | 51.438  |
| <b>Mrpl1</b>         | 137 | 0  | 2.283443 | 557  | 9.283333 | 2.39714  | 26.22812 | Stalled      | chr5:96637133-96695728    | 56.596  |
| <b>Xdh</b>           | 137 | 0  | 2.283443 | 170  | 2.833333 | 2.34103  | 14.14966 | Stalled      | chr17:74233247-74301522   | 66.276  |
| <b>Rfx7</b>          | 137 | 0  | 2.283443 | 895  | 14.91667 | 7.5504   | 47.82954 | Stalled      | chr9:72378046-72470756    | 90.711  |
| <b>Epb4.1</b>        | 137 | 0  | 2.283443 | 778  | 12.96667 | 10.5491  | 16.24403 | Stalled      | chr4:131479340-131633228  | 151.889 |
| <b>Klf10</b>         | 136 | 0  | 2.266775 | 86   | 1.433333 | 13.2992  | 10.38363 | Stalled      | chr15:38224167-38232462   | 6.296   |
| <b>216002J02Rik</b>  | 136 | 0  | 2.266775 | 58   | 0.966667 | 1.30633  | 26.70808 | Stalled      | chr4:154622104-154630792  | 6.689   |
| <b>Hnrnpab</b>       | 136 | 0  | 2.266775 | 810  | 13.5     | 229.983  | 4.536893 | Stalled      | chr11:51413601-51422383   | 6.783   |
| <b>Slc29a2</b>       | 136 | 0  | 2.266775 | 72   | 1.2      | 4.3939   | 26.38324 | Stalled      | chr19:5022005-5031972     | 7.968   |
| <b>A430105I19Rik</b> | 136 | 0  | 2.266775 | 30   | 0.5      | 0.048917 | 1.001919 | Unclassified | chr2:118579880-118590397  | 8.518   |
| <b>Sp6</b>           | 136 | 0  | 2.266775 | 51   | 0.85     | 1.62108  | 0        | Unclassified | chr11:96872882-96886052   | 11.171  |
| <b>Josd1</b>         | 136 | 0  | 2.266775 | 369  | 6.15     | 11.601   | 10.71782 | Stalled      | chr15:79504679-79520302   | 13.624  |
| <b>Grpel2</b>        | 136 | 0  | 2.266775 | 317  | 5.283333 | 5.54725  | 13.30385 | Stalled      | chr18:61872077-61887985   | 13.909  |
| <b>Rbck1</b>         | 136 | 0  | 2.266775 | 555  | 9.25     | 51.7861  | 9.420815 | Stalled      | chr2:152142069-152160375  | 16.307  |
| <b>Camta2</b>        | 136 | 0  | 2.266775 | 500  | 8.333333 | 8.68581  | 5.705509 | Stalled      | chr11:70482967-70503436   | 18.47   |
| <b>Muc6</b>          | 136 | 0  | 2.266775 | 160  | 2.666667 | 0.178448 | 0.112393 | Stalled      | chr7:148819948-148843207  | 21.26   |
| <b>Cap1</b>          | 136 | 0  | 2.266775 | 589  | 9.816667 | 63.9152  | 17.6138  | Stalled      | chr4:122536470-122565124  | 26.655  |
| <b>Nadk</b>          | 136 | 0  | 2.266775 | 333  | 5.55     | 22.48    | 20.63249 | Stalled      | chr4:154935923-154965109  | 27.187  |
| <b>Stt3a</b>         | 136 | 0  | 2.266775 | 414  | 6.9      | 34.5042  | 24.09096 | Stalled      | chr9:36539997-36577163    | 35.167  |
| <b>Wdct1</b>         | 136 | 0  | 2.266775 | 155  | 2.583333 | 9.29231  | 9.587913 | Stalled      | chr4:132848380-132897230  | 46.851  |
| <b>Cnot1</b>         | 136 | 0  | 2.266775 | 1637 | 27.28333 | 18.1134  | 16.05054 | Stalled      | chr8:98243350-98333366    | 88.017  |
| <b>Apbb1ip</b>       | 136 | 0  | 2.266775 | 973  | 16.21667 | 16.5079  | 25.05097 | Stalled      | chr2:22627846-22731173    | 101.328 |
| <b>9030409G11Rik</b> | 136 | 0  | 2.266775 | 218  | 3.633333 | 0.186614 | 1.536814 | Unclassified | chr4:141658304-141797316  | 137.013 |
| <b>Alcam</b>         | 136 | 58 | 2.266775 | 624  | 10.4     | 4.94292  | 27.24698 | Stalled      | chr16:52249108-52455110   | 204.003 |
| <b>Hist2h4</b>       | 135 | 49 | 2.250108 | 0    | 0        | 18.1664  | 642      | Unclassified | chr3:96066892-96069240    | 0.349   |
| <b>Sfn</b>           | 135 | 0  | 2.250108 | 7    | 0.116667 | 19.8005  | 6.693197 | Unclassified | chr4:133156470-133160083  | 1.614   |
| <b>Upk2</b>          | 135 | 0  | 2.250108 | 2    | 0.033333 | 0.07332  | 2.760969 | Unclassified | chr9:44260797-44264850    | 2.054   |
| <b>BC051628</b>      | 135 | 0  | 2.250108 | 21   | 0.35     | 0.148487 | 4.50462  | Stalled      | chr2:180952720-180957556  | 2.837   |
| <b>Rpl34</b>         | 135 | 0  | 2.250108 | 259  | 4.316667 | 223.27   | 4.304231 | Stalled      | chr3:130429748-130435226  | 3.479   |
| <b>1110008J03Rik</b> | 135 | 0  | 2.250108 | 20   | 0.333333 | 8.34482  | 9.025591 | Stalled      | chr5:121059071-121064578  | 3.508   |
| <b>Cst3</b>          | 135 | 0  | 2.250108 | 19   | 0.316667 | 58.9551  | 11.46186 | Stalled      | chr2:148697467-148703204  | 3.738   |
| <b>Idh3b</b>         | 135 | 0  | 2.250108 | 1099 | 18.31667 | 55.669   | 0.93677  | Elongating   | chr2:130105047-130112163  | 5.117   |
| <b>Syt8</b>          | 135 | 0  | 2.250108 | 13   | 0.216667 | 0        | 1.015439 | Unclassified | chr7:149618881-149626303  | 5.423   |
| <b>Myg1</b>          | 135 | 0  | 2.250108 | 170  | 2.833333 | 30.0648  | 5.974902 | Stalled      | chr15:102160139-102168569 | 6.431   |
| <b>AI314976</b>      | 135 | 0  | 2.250108 | 108  | 1.8      | 10.6125  | 21.78492 | Stalled      | chr17:48547404-48556591   | 7.188   |
| <b>Ppp1r15b</b>      | 135 | 0  | 2.250108 | 352  | 5.866667 | 24.9524  | 8.429334 | Stalled      | chr1:135025742-135036377  | 8.636   |
| <b>Mrpl47</b>        | 135 | 0  | 2.250108 | 184  | 3.066667 | 11.1684  | 11.27037 | Stalled      | chr3:32626460-32637697    | 9.238   |
| <b>Cox18</b>         | 135 | 0  | 2.250108 | 265  | 4.416667 | 8.66405  | 16.10186 | Stalled      | chr5:90643751-90665021    | 9.271   |
| <b>Glrx</b>          | 135 | 0  | 2.250108 | 117  | 1.95     | 17.6337  | 9.320796 | Stalled      | chr13:75975333-75987599   | 10.267  |
| <b>Exoc1</b>         | 135 | 0  | 2.250108 | 318  | 5.3      | 20.5179  | 13.11973 | Stalled      | chr19:41997469-42009804   | 10.336  |
| <b>Rab4b</b>         | 135 | 0  | 2.250108 | 204  | 3.4      | 37.1877  | 8.634916 | Stalled      | chr7:27953451-27965902    | 10.452  |
| <b>Zdhhc16</b>       | 135 | 0  | 2.250108 | 232  | 3.866667 | 15.8725  | 16.10596 | Stalled      | chr19:42005961-42018593   | 10.633  |
| <b>Tmed5</b>         | 135 | 0  | 2.250108 | 127  | 2.116667 | 10.6748  | 24.76586 | Stalled      | chr5:108550665-108563610  | 10.946  |
| <b>Rnf207</b>        | 135 | 0  | 2.250108 | 54   | 0.9      | 0.186357 | 1.148969 | Unclassified | chr4:151681131-151694734  | 11.604  |
| <b>Wrb</b>           | 135 | 0  | 2.250108 | 67   | 1.116667 | 2.6307   | 19.68158 | Stalled      | chr16:96365025-96379459   | 12.435  |
| <b>Ndufb5</b>        | 135 | 0  | 2.250108 | 209  | 3.483333 | 37.9315  | 16.62241 | Stalled      | chr3:32633984-32650481    | 14.498  |
| <b>Ehmt2</b>         | 135 | 0  | 2.250108 | 444  | 7.4      | 47.5753  | 6.123978 | Stalled      | chr17:35033443-35050992   | 15.55   |
| <b>Susd3</b>         | 135 | 0  | 2.250108 | 363  | 6.05     | 13.7549  | 5.123501 | Stalled      | chr13:49326201-49345532   | 17.332  |
| <b>Atad3a</b>        | 135 | 0  | 2.250108 | 595  | 9.916667 | 24.2509  | 7.537105 | Stalled      | chr4:155114749-155137207  | 20.459  |
| <b>Kbtbd11</b>       | 135 | 0  | 2.250108 | 92   | 1.533333 | 3.10142  | 1.12828  | Unclassified | chr8:15009024-15033330    | 22.307  |
| <b>Gart</b>          | 135 | 0  | 2.250108 | 670  | 11.16667 | 28.4644  | 16.77208 | Stalled      | chr16:91621641-91649217   | 25.577  |
| <b>Lhfp14</b>        | 135 | 0  | 2.250108 | 48   | 0.8      | 0.215174 | 1.769808 | Unclassified | chr6:113118080-113147378  | 27.299  |
| <b>Nupl1</b>         | 135 | 0  | 2.250108 | 228  | 3.8      | 64.0986  | 60.88988 | Stalled      | chr14:60838304-60872215   | 31.912  |
| <b>Gpr155</b>        | 135 | 0  | 2.250108 | 129  | 2.15     | 2.73116  | 38.4107  | Stalled      | chr2:73188948-73226455    | 35.508  |
| <b>Kcnk3</b>         | 135 | 0  | 2.250108 | 99   | 1.65     | 0.924969 | 0        | Unclassified | chr5:30888542-30927643    | 37.102  |
| <b>Cand1</b>         | 135 | 0  | 2.250108 | 542  | 9.033333 | 11.026   | 33.79987 | Stalled      | chr10:118635867-118679111 | 41.245  |
| <b>Cul4a</b>         | 135 | 0  | 2.250108 | 406  | 6.766667 | 8.03451  | 29.58638 | Stalled      | chr8:13103720-13147939    | 42.22   |
| <b>Gm5820</b>        | 135 | 0  | 2.250108 | 108  | 1.8      | 0.017613 | 0        | Unclassified | chr18:39050111-39130926   | 78.816  |
| <b>Pax7</b>          | 135 | 0  | 2.250108 | 139  | 2.316667 | 0.098933 | 0        | Unclassified | chr4:139239995-139390883  | 94.889  |
| <b>Igf1r</b>         | 135 | 0  | 2.250108 | 436  | 7.266667 | 0.369561 | 3.914116 | Unclassified | chr7:75095142-75378553    | 281.412 |
| <b>Endog</b>         | 134 | 0  | 2.23344  | 58   | 0.966667 | 13.4708  | 6.390952 | Stalled      | chr2:30025043-30029589    | 2.547   |
| <b>Psmg3</b>         | 134 | 0  | 2.23344  | 71   | 1.183333 | 29.5827  | 7.344459 | Stalled      | chr5:140299547-140304797  | 3.251   |
| <b>Vps28</b>         | 134 | 0  | 2.23344  | 86   | 1.433333 | 69.6462  | 4.993097 | Stalled      | chr15:76452517-76458457   | 3.941   |
| <b>Gnat1</b>         | 134 | 0  | 2.23344  | 21   | 0.35     | 1.00402  | 0.492038 | Unclassified | chr9:107576804-107583923  | 5.12    |
| <b>H2-DMB2</b>       | 134 | 0  | 2.23344  | 406  | 6.766667 | 206.245  | 3.009109 | Stalled      | chr17:34280360-34288040   | 5.681   |
| <b>Trmt61a</b>       | 134 | 0  | 2.23344  | 291  | 4.85     | 23.7805  | 4.201978 | Stalled      | chr12:112914315-112922113 | 5.799   |
| <b>Rin1</b>          | 134 | 0  | 2.23344  | 32   | 0.533333 | 0.27301  | 5.792701 | Stalled      | chr19:5048807-5057071     | 6.265   |
| <b>Mterfd3</b>       | 134 | 0  | 2.23344  | 52   | 0.866667 | 2.24161  | 8.384206 | Stalled      | chr10:84582180-84592746   | 8.567   |
| <b>Homer3</b>        | 134 | 0  | 2.23344  | 244  | 4.066667 | 4.1967   | 1.425935 | Elongating   | chr8:72804897-72818259    | 11.363  |
| <b>Oas1b</b>         | 134 | 0  | 2.23344  | 308  | 5.133333 | 10.842   | 5.32089  | Stalled      | chr5:121260643-121274169  | 11.527  |
| <b>Arfgap2</b>       | 134 | 0  | 2.23344  | 420  | 7        | 22.6679  | 7.413827 | Stalled      | chr2:91103271-91117528    | 12.258  |
| <b>Abcf3</b>         | 134 | 0  | 2.23344  | 156  | 2.6      | 11.5126  | 22.50348 | Stalled      | chr16:20546675-20561676   | 13.002  |
| <b>Acot13</b>        | 134 | 0  | 2.23344  | 87   | 1.45     | 22.6943  | 52.39286 | Stalled      | chr13:24909823-24925358   | 13.536  |
| <b>Stx5a</b>         | 134 | 0  | 2.23344  | 200  | 3.333333 | 28.2837  | 16.16764 | Stalled      | chr19:8814292-8830131     | 13.84   |
| <b>Hars</b>          | 134 | 0  | 2.23344  | 248  | 4.133333 | 43.6619  | 20.0959  | Stalled      | chr18:36926183-36944859   | 16.677  |

|                      |     |    |          |      |          |          |          |              |                           |         |
|----------------------|-----|----|----------|------|----------|----------|----------|--------------|---------------------------|---------|
| <b>4632434I11Rik</b> | 134 | 0  | 2.23344  | 55   | 0.916667 | 1.70781  | 44.65056 | Stalled      | chr7:100006036-100024742  | 16.707  |
| <b>Sh3bp5l</b>       | 134 | 0  | 2.23344  | 154  | 2.566667 | 6.96922  | 11.67786 | Stalled      | chr11:58142219-58161229   | 17.011  |
| <b>Rab3il1</b>       | 134 | 0  | 2.23344  | 41   | 0.683333 | 0.187825 | 2.281729 | Unclassified | chr19:10090717-10110076   | 17.36   |
| <b>Ap3m2</b>         | 134 | 0  | 2.23344  | 77   | 1.283333 | 3.72562  | 22.56735 | Stalled      | chr8:23897825-23918126    | 18.302  |
| <b>Nudt9</b>         | 134 | 0  | 2.23344  | 94   | 1.566667 | 22.6893  | 39.43654 | Stalled      | chr5:104474029-104494386  | 18.358  |
| <b>Fam174a</b>       | 134 | 0  | 2.23344  | 57   | 0.95     | 9.57845  | 43.36004 | Stalled      | chr1:97208204-97231861    | 21.658  |
| <b>Slc33a1</b>       | 134 | 0  | 2.23344  | 192  | 3.2      | 13.8361  | 22.06093 | Stalled      | chr3:63746257-63770655    | 22.399  |
| <b>Rwdd1</b>         | 134 | 0  | 2.23344  | 141  | 2.35     | 24.776   | 49.927   | Stalled      | chr10:33716360-33741422   | 23.063  |
| <b>Smpd4</b>         | 134 | 0  | 2.23344  | 408  | 6.8      | 7.04169  | 3.791868 | Stalled      | chr16:17617446-17644921   | 25.476  |
| <b>Wdr45l</b>        | 134 | 0  | 2.23344  | 474  | 7.9      | 8.68952  | 23.39992 | Stalled      | chr11:121188516-121217761 | 27.246  |
| <b>Usp20</b>         | 134 | 0  | 2.23344  | 237  | 3.95     | 2.3974   | 0.805646 | Stalled      | chr2:30849563-30879102    | 27.54   |
| <b>Sgsm3</b>         | 134 | 0  | 2.23344  | 316  | 5.266667 | 4.64638  | 5.65919  | Stalled      | chr15:80806194-80842719   | 34.526  |
| <b>Cttn</b>          | 134 | 0  | 2.23344  | 92   | 1.533333 | 0.332925 | 2.699514 | Unclassified | chr7:151621628-151658646  | 35.019  |
| <b>Polr3g</b>        | 134 | 0  | 2.23344  | 328  | 5.466667 | 3.84432  | 26.92155 | Stalled      | chr13:81812835-81852012   | 37.178  |
| <b>Arfgap3</b>       | 134 | 0  | 2.23344  | 492  | 8.2      | 8.91763  | 9.965635 | Stalled      | chr15:83130169-83182677   | 50.509  |
| <b>Pigl</b>          | 134 | 0  | 2.23344  | 189  | 3.15     | 5.73804  | 81.62655 | Stalled      | chr11:62269961-62327402   | 55.442  |
| <b>Pfkip</b>         | 134 | 0  | 2.23344  | 1115 | 18.58333 | 28.127   | 10.26799 | Stalled      | chr13:6579119-6649970     | 68.852  |
| <b>Spsb4</b>         | 134 | 0  | 2.23344  | 95   | 1.583333 | 0.200973 | 1.749815 | Unclassified | chr9:96843900-96920774    | 74.875  |
| <b>Abli1</b>         | 134 | 0  | 2.23344  | 1754 | 29.23333 | 36.2825  | 8.526565 | Stalled      | chr19:57107753-57195499   | 85.747  |
| <b>Tanc1</b>         | 134 | 0  | 2.23344  | 724  | 12.06667 | 1.23525  | 13.1519  | Stalled      | chr2:59448100-59684206    | 234.107 |
| <b>Gm11808</b>       | 133 | 0  | 2.216773 | 164  | 2.733333 | 0        | 3.466563 | Stalled      | chr8:73032173-73036260    | 2.088   |
| <b>Uba52</b>         | 133 | 0  | 2.216773 | 168  | 2.8      | 147.576  | 3.430915 | Stalled      | chr8:73032164-73036266    | 2.103   |
| <b>Lta</b>           | 133 | 0  | 2.216773 | 99   | 1.65     | 9.36546  | 2.428808 | Stalled      | chr17:35340110-35344296   | 2.187   |
| <b>Rce1</b>          | 133 | 0  | 2.216773 | 46   | 0.766667 | 14.5858  | 15.05783 | Stalled      | chr19:4622550-4627617     | 3.068   |
| <b>Lmf2</b>          | 133 | 0  | 2.216773 | 88   | 1.466667 | 15.0978  | 9.495903 | Stalled      | chr15:89181434-89188090   | 4.657   |
| <b>Dpagt1</b>        | 133 | 0  | 2.216773 | 86   | 1.433333 | 14.2805  | 9.348529 | Stalled      | chr9:44132927-44114683    | 6.757   |
| <b>Mis12</b>         | 133 | 0  | 2.216773 | 112  | 1.866667 | 13.968   | 27.41574 | Stalled      | chr11:70831112-70840636   | 7.525   |
| <b>9930104L06Rik</b> | 133 | 0  | 2.216773 | 136  | 2.266667 | 10.2353  | 8.209901 | Stalled      | chr4:124612291-124621905  | 7.615   |
| <b>Rgl2</b>          | 133 | 0  | 2.216773 | 144  | 2.4      | 10.3255  | 15.72635 | Stalled      | chr17:34064838-34074632   | 7.795   |
| <b>Ifi35</b>         | 133 | 0  | 2.216773 | 161  | 2.683333 | 35.0889  | 9.60248  | Stalled      | chr11:101307725-101320015 | 10.291  |
| <b>Derl2</b>         | 133 | 0  | 2.216773 | 139  | 2.316667 | 7.59764  | 27.58804 | Stalled      | chr11:70820946-70834765   | 11.82   |
| <b>Arpc4</b>         | 133 | 0  | 2.216773 | 566  | 9.433333 | 129.939  | 6.754445 | Stalled      | chr6:113326106-113340441  | 12.336  |
| <b>Mtg1</b>          | 133 | 0  | 2.216773 | 106  | 1.766667 | 6.93358  | 39.29084 | Stalled      | chr7:147321462-147336685  | 13.224  |
| <b>Centb1</b>        | 133 | 0  | 2.216773 | 277  | 4.616667 | 38.3814  | 3.131936 | Stalled      | chr11:69695068-69711041   | 13.974  |
| <b>Htra4</b>         | 133 | 0  | 2.216773 | 61   | 1.016667 | 1.42746  | 25.70717 | Stalled      | chr8:26135399-26151434    | 14.036  |
| <b>Cc2d1a</b>        | 133 | 0  | 2.216773 | 180  | 3        | 7.95899  | 8.258804 | Stalled      | chr8:86656726-86673652    | 14.927  |
| <b>Lrrc59</b>        | 133 | 0  | 2.216773 | 901  | 15.01667 | 74.219   | 4.78021  | Stalled      | chr11:94489137-94506530   | 15.394  |
| <b>Slc35a5</b>       | 133 | 0  | 2.216773 | 78   | 1.3      | 2.18822  | 52.74146 | Stalled      | chr16:45139685-45160786   | 19.102  |
| <b>Mthfr</b>         | 133 | 0  | 2.216773 | 359  | 5.983333 | 3.86592  | 12.20232 | Stalled      | chr4:147411185-147433671  | 20.487  |
| <b>Alg8</b>          | 133 | 0  | 2.216773 | 345  | 5.75     | 6.83214  | 28.35947 | Stalled      | chr7:104518126-104540668  | 20.543  |
| <b>Ccdc135</b>       | 133 | 0  | 2.216773 | 42   | 0.7      | 0.013577 | 0        | Unclassified | chr8:97577002-97602041    | 23.04   |
| <b>Nudt5</b>         | 133 | 0  | 2.216773 | 244  | 4.066667 | 21.3145  | 23.58048 | Stalled      | chr2:5764079-5789782      | 23.704  |
| <b>4930432K21Rik</b> | 133 | 0  | 2.216773 | 45   | 0.75     | 0.837581 | 41.23802 | Stalled      | chr8:86669936-86696496    | 24.561  |
| <b>Smg5</b>          | 133 | 0  | 2.216773 | 914  | 15.23333 | 21.9633  | 18.24017 | Stalled      | chr3:88138181-88166259    | 26.079  |
| <b>Ttc38</b>         | 133 | 0  | 2.216773 | 152  | 2.533333 | 2.49908  | 19.83867 | Stalled      | chr15:85660733-85689252   | 26.52   |
| <b>Prepl</b>         | 133 | 0  | 2.216773 | 82   | 1.366667 | 4.30929  | 22.96911 | Stalled      | chr17:85462818-85491607   | 26.79   |
| <b>1110031I02Rik</b> | 133 | 0  | 2.216773 | 128  | 2.133333 | 30.4619  | 30.27583 | Stalled      | chr11:121038906-121067962 | 27.057  |
| <b>Sart3</b>         | 133 | 0  | 2.216773 | 1032 | 17.2     | 28.7049  | 5.240859 | Stalled      | chr5:114192454-114223658  | 29.205  |
| <b>Atg3</b>          | 133 | 0  | 2.216773 | 140  | 2.333333 | 12.6766  | 45.43768 | Stalled      | chr16:45156941-45188651   | 29.711  |
| <b>Dclre1c</b>       | 133 | 54 | 2.216773 | 502  | 8.366667 | 5.75302  | 11.70639 | Stalled      | chr2:3339402-3378389      | 36.988  |
| <b>Rpa1</b>          | 133 | 0  | 2.216773 | 786  | 13.1     | 36.0556  | 16.74332 | Stalled      | chr11:75113760-75163885   | 48.126  |
| <b>Cdc123</b>        | 133 | 0  | 2.216773 | 434  | 7.233333 | 36.5257  | 26.90485 | Stalled      | chr2:5715339-5768006      | 50.668  |
| <b>Atp6v1a</b>       | 133 | 0  | 2.216773 | 238  | 3.966667 | 12.7017  | 32.9516  | Stalled      | chr16:44085516-44141132   | 53.617  |
| <b>Prpc</b>          | 133 | 0  | 2.216773 | 122  | 2.033333 | 4.59017  | 97.68569 | Stalled      | chr7:100021762-100083091  | 59.333  |
| <b>Scarb2</b>        | 133 | 0  | 2.216773 | 273  | 4.55     | 6.64387  | 19.83698 | Stalled      | chr5:92872898-92936634    | 61.737  |
| <b>Wdr51a</b>        | 133 | 0  | 2.216773 | 482  | 8.033333 | 10.5766  | 19.86234 | Stalled      | chr9:106181391-106252222  | 68.832  |
| <b>Abi1</b>          | 133 | 0  | 2.216773 | 760  | 12.66667 | 9.70558  | 25.17194 | Stalled      | chr2:31542075-31659747    | 115.673 |
| <b>Lclat1</b>        | 133 | 0  | 2.216773 | 538  | 8.966667 | 2.10926  | 25.58081 | Stalled      | chr17:73455333-73592706   | 135.374 |
| <b>Grk5</b>          | 133 | 0  | 2.216773 | 485  | 8.083333 | 5.10589  | 47.60122 | Stalled      | chr19:60963651-61168458   | 202.808 |
| <b>Syne2</b>         | 133 | 0  | 2.216773 | 501  | 8.35     | 0.693609 | 9.933642 | Stalled      | chr12:76917304-77211915   | 292.612 |
| <b>1700106N22Rik</b> | 133 | 0  | 2.216773 | 485  | 8.083333 | 3.13431  | 35.31513 | Stalled      | chr17:85488039-85857920   | 367.882 |
| <b>Prelid1</b>       | 132 | 0  | 2.200105 | 89   | 1.483333 | 180.521  | 5.984214 | Stalled      | chr13:55421415-55426633   | 3.219   |
| <b>Nit1</b>          | 132 | 0  | 2.200105 | 86   | 1.433333 | 8.7439   | 7.201846 | Stalled      | chr1:173272374-173277757  | 3.384   |
| <b>Ccdc17</b>        | 132 | 0  | 2.200105 | 331  | 5.516667 | 0        | 0.852245 | Elongating   | chr4:116267334-116272871  | 3.538   |
| <b>BC003266</b>      | 132 | 0  | 2.200105 | 51   | 0.85     | 15.7211  | 11.70976 | Stalled      | chr4:126919027-126925053  | 4.027   |
| <b>Selk</b>          | 132 | 0  | 2.200105 | 104  | 1.733333 | 26.8678  | 14.64294 | Stalled      | chr14:30779565-30788260   | 6.696   |
| <b>Aes</b>           | 132 | 0  | 2.200105 | 193  | 3.216667 | 167.165  | 3.124865 | Stalled      | chr10:81020304-81029109   | 6.806   |
| <b>Cmtm3</b>         | 132 | 0  | 2.200105 | 48   | 0.8      | 3.26687  | 10.56805 | Stalled      | chr8:106862493-106871572  | 7.08    |
| <b>Ppp2r5b</b>       | 132 | 0  | 2.200105 | 18   | 0.3      | 3.17529  | 20.0329  | Stalled      | chr19:6227766-6237840     | 8.075   |
| <b>Mak16</b>         | 132 | 0  | 2.200105 | 260  | 4.333333 | 20.2651  | 16.09993 | Stalled      | chr8:32269939-32281196    | 9.258   |
| <b>Thbs3</b>         | 132 | 0  | 2.200105 | 88   | 1.466667 | 0.209509 | 2.159149 | Elongating   | chr3:89017108-89030757    | 11.65   |
| <b>Eif1a</b>         | 132 | 0  | 2.200105 | 513  | 8.55     | 20.9749  | 6.942056 | Stalled      | chr18:46755357-46769879   | 12.523  |
| <b>Padi6</b>         | 132 | 0  | 2.200105 | 92   | 1.533333 | 0.054935 | 0.941105 | Unclassified | chr4:140283269-140300558  | 15.29   |
| <b>Mynn</b>          | 132 | 0  | 2.200105 | 183  | 3.05     | 4.47127  | 7.999269 | Stalled      | chr3:30499008-30517416    | 16.409  |
| <b>Pxmp4</b>         | 132 | 84 | 2.200105 | 133  | 2.216667 | 11.3668  | 14.82847 | Stalled      | chr2:154412779-154431409  | 16.631  |
| <b>Zfp715</b>        | 132 | 0  | 2.200105 | 125  | 2.083333 | 1.95886  | 24.04505 | Stalled      | chr7:50551892-50570631    | 16.74   |
| <b>Tnnt2</b>         | 132 | 0  | 2.200105 | 68   | 1.133333 | 0.672691 | 1.152898 | Unclassified | chr7:149682740-149701913  | 17.174  |
| <b>Map2k3</b>        | 132 | 0  | 2.200105 | 468  | 7.8      | 14.2635  | 9.636173 | Stalled      | chr11:60743558-60766305   | 20.748  |
| <b>Rpp30</b>         | 132 | 0  | 2.200105 | 283  | 4.716667 | 15.0655  | 8.53791  | Stalled      | chr19:36156205-36179262   | 21.058  |
| <b>Mtap1a</b>        | 132 | 0  | 2.200105 | 77   | 1.283333 | 0.536636 | 8.323837 | Stalled      | chr2:121113335-121136568  | 21.234  |
| <b>Tert</b>          | 132 | 0  | 2.200105 | 57   | 0.95     | 1.15573  | 9.97609  | Stalled      | chr13:73762448-73786489   | 22.042  |
| <b>Scly</b>          | 132 | 0  | 2.200105 | 267  | 4.45     | 10.2481  | 12.27479 | Stalled      | chr1:93192914-93217657    | 22.744  |
| <b>Cops4</b>         | 132 | 0  | 2.200105 | 332  | 5.533333 | 24.1743  | 11.2239  | Stalled      | chr5:100945327-100976820  | 29.494  |
| <b>Wispl</b>         | 132 | 0  | 2.200105 | 51   | 0.85     | 0.033177 | 1.129767 | Unclassified | chr15:66720954-66754761   | 31.808  |
| <b>Emp2</b>          | 132 | 0  | 2.200105 | 78   | 1.3      | 0.167552 | 1.429258 | Unclassified | chr16:10281841-10316061   | 32.221  |
| <b>Rab6</b>          | 132 | 0  | 2.200105 | 133  | 2.216667 | 9.17629  | 55.62795 | Stalled      | chr7:107754099-107789781  | 33.683  |



|                      |     |     |          |      |          |          |          |              |                           |         |
|----------------------|-----|-----|----------|------|----------|----------|----------|--------------|---------------------------|---------|
| <b>Gtf2ird2</b>      | 132 | 0   | 2.200105 | 408  | 6.8      | 2.8529   | 22.21609 | Stalled      | chr5:134657907-134694013  | 34.107  |
| <b>Kif5a</b>         | 132 | 0   | 2.200105 | 113  | 1.883333 | 0.367646 | 1.948441 | Unclassified | chr10:126662754-126702136 | 37.383  |
| <b>Adar</b>          | 132 | 0   | 2.200105 | 1797 | 29.95    | 21.7644  | 2.265099 | Elongating   | chr3:89516943-89557376    | 38.434  |
| <b>Sox13</b>         | 132 | 0   | 2.200105 | 283  | 4.716667 | 0.275652 | 1.136802 | Stalled      | chr1:135278876-135322789  | 41.914  |
| <b>Dcaf8</b>         | 132 | 0   | 2.200105 | 793  | 13.21667 | 23.3798  | 22.21343 | Stalled      | chr1:174076145-174126524  | 48.38   |
| <b>D030074E01Rik</b> | 132 | 0   | 2.200105 | 305  | 5.083333 | 3.64596  | 29.44935 | Stalled      | chr18:21004645-21056579   | 49.935  |
| <b>Kcnt1</b>         | 132 | 0   | 2.200105 | 92   | 1.533333 | 0.101923 | 0.734708 | Unclassified | chr2:25717373-25773793    | 54.421  |
| <b>Tpr</b>           | 132 | 0   | 2.200105 | 398  | 6.633333 | 22.5148  | 24.95452 | Stalled      | chr1:152237967-152297064  | 57.098  |
| <b>Ep300</b>         | 132 | 0   | 2.200105 | 715  | 11.91667 | 13.4221  | 27.19811 | Stalled      | chr15:81414643-81482507   | 65.865  |
| <b>Tank</b>          | 132 | 95  | 2.200105 | 1099 | 18.31667 | 12.5398  | 6.482256 | Stalled      | chr2:61414642-61492224    | 75.583  |
| <b>Blm</b>           | 132 | 0   | 2.200105 | 917  | 15.28333 | 7.80597  | 20.78282 | Stalled      | chr7:87599878-87681884    | 80.007  |
| <b>Ankfy1</b>        | 132 | 0   | 2.200105 | 923  | 15.38333 | 5.59037  | 25.0514  | Stalled      | chr11:72501503-72585648   | 82.146  |
| <b>Afap1</b>         | 132 | 0   | 2.200105 | 280  | 4.666667 | 0.306425 | 14.91014 | Stalled      | chr5:36233967-36346571    | 110.605 |
| <b>Zswim5</b>        | 132 | 0   | 2.200105 | 93   | 1.55     | 0.311048 | 4.34766  | Unclassified | chr4:116548006-116661710  | 111.705 |
| <b>Gm5567</b>        | 132 | 0   | 2.200105 | 116  | 1.933333 | 0.012435 | 0.541687 | Unclassified | chr6:40058251-40198352    | 138.102 |
| <b>Gsk3b</b>         | 132 | 0   | 2.200105 | 1053 | 17.55    | 4.53051  | 47.63417 | Stalled      | chr16:38087086-38246165   | 157.08  |
| <b>Zfp827</b>        | 132 | 0   | 2.200105 | 1057 | 17.61667 | 0.876164 | 12.91687 | Stalled      | chr8:81550335-81717665    | 165.331 |
| <b>Higd2a</b>        | 131 | 0   | 2.183438 | 0    | 0        | 69.0867  | 242      | Unclassified | chr13:54689591-54692508   | 0.918   |
| <b>Ch25h</b>         | 131 | 0   | 2.183438 | 0    | 0        | 4.15993  | 4        | Unclassified | chr19:34548273-34551625   | 1.353   |
| <b>Ssna1</b>         | 131 | 0   | 2.183438 | 10   | 0.166667 | 39.7494  | 8.184472 | Unclassified | chr2:25126558-25129938    | 1.381   |
| <b>1810009A15Rik</b> | 131 | 0   | 2.183438 | 12   | 0.2      | 53.9087  | 28.62232 | Unclassified | chr19:8961392-8965230     | 1.839   |
| <b>Tmem179b</b>      | 131 | 0   | 2.183438 | 106  | 1.766667 | 15.5939  | 5.366041 | Unclassified | chr19:8847011-8850957     | 1.947   |
| <b>Hcst</b>          | 131 | 0   | 2.183438 | 44   | 0.733333 | 7.38174  | 4.557517 | Stalled      | chr7:31202731-31206873    | 2.143   |
| <b>Pard6a</b>        | 131 | 0   | 2.183438 | 44   | 0.733333 | 8.80507  | 6.511402 | Stalled      | chr8:108223053-108227394  | 2.342   |
| <b>Acd</b>           | 131 | 0   | 2.183438 | 123  | 2.05     | 27.3131  | 3.474619 | Stalled      | chr8:108222058-108226995  | 2.938   |
| <b>Sdr39u1</b>       | 131 | 0   | 2.183438 | 155  | 2.583333 | 26.3386  | 4.495333 | Stalled      | chr14:56516121-56521069   | 2.949   |
| <b>Trappc2l</b>      | 131 | 0   | 2.183438 | 51   | 0.85     | 15.1909  | 16.76296 | Stalled      | chr8:125133525-125139490  | 3.966   |
| <b>Coasy</b>         | 131 | 0   | 2.183438 | 67   | 1.116667 | 16.4491  | 12.2415  | Stalled      | chr11:100941938-100947933 | 3.996   |
| <b>Znrd1</b>         | 131 | 0   | 2.183438 | 26   | 0.433333 | 30.1274  | 19.44304 | Stalled      | chr17:37091302-37097373   | 4.072   |
| <b>Mxra8</b>         | 131 | 0   | 2.183438 | 66   | 1.1      | 1.90842  | 0.246601 | Stalled      | chr4:155211788-155218211  | 4.424   |
| <b>1700040I03Rik</b> | 131 | 0   | 2.183438 | 142  | 2.366667 | 9.53492  | 7.254723 | Stalled      | chr6:85396778-85403296    | 4.519   |
| <b>Arsa</b>          | 131 | 0   | 2.183438 | 234  | 3.9      | 10.7572  | 0.148694 | Stalled      | chr15:89302926-89309856   | 4.931   |
| <b>Nop16</b>         | 131 | 0   | 2.183438 | 114  | 1.9      | 27.2943  | 9.286369 | Stalled      | chr13:54685551-54693435   | 5.885   |
| <b>Exoc3l</b>        | 131 | 0   | 2.183438 | 29   | 0.483333 | 1.33935  | 2.27177  | Unclassified | chr8:107813823-107821998  | 6.176   |
| <b>1810043G02Rik</b> | 131 | 0   | 2.183438 | 77   | 1.283333 | 2.9165   | 7.553086 | Stalled      | chr10:77439394-77448183   | 6.79    |
| <b>1700022C21Rik</b> | 131 | 0   | 2.183438 | 34   | 0.566667 | 3.33752  | 26.37262 | Stalled      | chr17:37093536-37102568   | 7.033   |
| <b>Ticam1</b>        | 131 | 47  | 2.183438 | 450  | 7.5      | 15.003   | 2.735867 | Stalled      | chr17:56408886-56418190   | 7.305   |
| <b>Klhf21</b>        | 131 | 0   | 2.183438 | 166  | 2.766667 | 6.48337  | 10.26223 | Stalled      | chr4:151380999-151391786  | 8.788   |
| <b>BC049762</b>      | 131 | 0   | 2.183438 | 21   | 0.35     | 2.56826  | 113.0468 | Stalled      | chr11:51067152-51078453   | 9.302   |
| <b>Bad</b>           | 131 | 0   | 2.183438 | 313  | 5.216667 | 24.3648  | 6.231772 | Stalled      | chr19:7014344-7026383     | 10.04   |
| <b>Dpep2</b>         | 131 | 0   | 2.183438 | 26   | 0.433333 | 0.079161 | 0.855257 | Unclassified | chr8:108508956-108522323  | 11.368  |
| <b>Egfl7</b>         | 131 | 0   | 2.183438 | 178  | 2.966667 | 13.5296  | 0.394371 | Stalled      | chr2:26434575-26448201    | 11.627  |
| <b>Anapc2</b>        | 131 | 0   | 2.183438 | 156  | 2.6      | 19.8551  | 16.18731 | Stalled      | chr2:25125985-25141435    | 13.451  |
| <b>Stk11</b>         | 131 | 0   | 2.183438 | 478  | 7.966667 | 59.9499  | 1.844477 | Elongating   | chr10:79577280-79593215   | 13.936  |
| <b>Pin1</b>          | 131 | 0   | 2.183438 | 582  | 9.7      | 13.0719  | 5.446072 | Stalled      | chr9:20454573-20471028    | 14.456  |
| <b>Tmem11</b>        | 131 | 0   | 2.183438 | 486  | 8.1      | 28.909   | 8.294328 | Stalled      | chr11:60677955-60694540   | 14.586  |
| <b>Rgs14</b>         | 131 | 0   | 2.183438 | 160  | 2.666667 | 8.10794  | 7.541355 | Stalled      | chr13:55469092-55486047   | 14.956  |
| <b>Dhx38</b>         | 131 | 0   | 2.183438 | 484  | 8.066667 | 21.2904  | 4.504272 | Stalled      | chr8:112071923-112091501  | 17.579  |
| <b>Otub2</b>         | 131 | 0   | 2.183438 | 429  | 7.15     | 2.18353  | 1.381564 | Elongating   | chr12:104624914-104644553 | 17.64   |
| <b>4632415K11Rik</b> | 131 | 0   | 2.183438 | 91   | 1.516667 | 1.60287  | 21.85216 | Stalled      | chr8:122284486-122304316  | 17.831  |
| <b>Tpd52l2</b>       | 131 | 0   | 2.183438 | 182  | 3.033333 | 13.5811  | 21.78197 | Stalled      | chr2:181229957-181251462  | 19.506  |
| <b>Wdr82</b>         | 131 | 0   | 2.183438 | 588  | 9.8      | 16.4124  | 11.06465 | Stalled      | chr9:106071259-106094037  | 20.779  |
| <b>Ppp2r3c</b>       | 131 | 0   | 2.183438 | 156  | 2.6      | 2.15662  | 21.52426 | Stalled      | chr12:56381800-56405987   | 22.188  |
| <b>Ubxn8</b>         | 131 | 0   | 2.183438 | 262  | 4.366667 | 3.57775  | 26.34446 | Stalled      | chr8:34730057-34754448    | 22.392  |
| <b>Notch4</b>        | 131 | 0   | 2.183438 | 365  | 6.083333 | 2.10883  | 0.179652 | Stalled      | chr17:34699239-34725488   | 24.25   |
| <b>Mecr</b>          | 131 | 0   | 2.183438 | 368  | 6.133333 | 18.0952  | 13.46697 | Stalled      | chr4:131397385-131423702  | 24.318  |
| <b>Copg</b>          | 131 | 0   | 2.183438 | 817  | 13.61667 | 32.3812  | 7.265068 | Stalled      | chr6:87835933-87863588    | 25.656  |
| <b>2010321M09Rik</b> | 131 | 0   | 2.183438 | 463  | 7.716667 | 10.9225  | 12.51678 | Stalled      | chr9:64806638-64834781    | 26.144  |
| <b>Lbr</b>           | 131 | 0   | 2.183438 | 830  | 13.83333 | 32.333   | 13.07265 | Stalled      | chr1:183745446-183774532  | 27.087  |
| <b>Htra3</b>         | 131 | 0   | 2.183438 | 66   | 1.1      | 0.064131 | 0.576835 | Unclassified | chr5:35994681-36024431    | 27.751  |
| <b>Qtrtd1</b>        | 131 | 0   | 2.183438 | 214  | 3.566667 | 4.25357  | 13.10899 | Stalled      | chr16:43861525-43891789   | 28.265  |
| <b>E330009J07Rik</b> | 131 | 63  | 2.183438 | 241  | 4.016667 | 6.17368  | 11.93392 | Stalled      | chr6:40357496-40388132    | 28.637  |
| <b>Haus6</b>         | 131 | 0   | 2.183438 | 265  | 4.416667 | 6.87698  | 22.29878 | Stalled      | chr4:86227188-86259926    | 30.739  |
| <b>Aagab</b>         | 131 | 0   | 2.183438 | 434  | 7.233333 | 8.58598  | 18.37973 | Stalled      | chr9:63448461-63489696    | 39.236  |
| <b>Stil</b>          | 131 | 0   | 2.183438 | 331  | 5.516667 | 3.81186  | 24.70223 | Stalled      | chr4:114670722-114715803  | 43.082  |
| <b>Fubp3</b>         | 131 | 0   | 2.183438 | 282  | 4.7      | 5.60552  | 16.40018 | Stalled      | chr2:31426244-31473039    | 44.796  |
| <b>Ifih1</b>         | 131 | 0   | 2.183438 | 518  | 8.633333 | 7.5963   | 17.52052 | Stalled      | chr2:62433849-62486312    | 50.464  |
| <b>Prpf6</b>         | 131 | 0   | 2.183438 | 327  | 5.45     | 20.9142  | 35.20325 | Stalled      | chr2:181334023-181390366  | 54.344  |
| <b>2210018M11Rik</b> | 131 | 0   | 2.183438 | 283  | 4.716667 | 4.3898   | 58.43704 | Stalled      | chr7:105739115-105807079  | 65.965  |
| <b>Ptpru</b>         | 131 | 0   | 2.183438 | 113  | 1.883333 | 0.166168 | 3.785165 | Unclassified | chr4:131324371-131396193  | 69.823  |
| <b>1110008L16Rik</b> | 131 | 0   | 2.183438 | 398  | 6.633333 | 8.06395  | 27.28547 | Stalled      | chr12:56401623-56483478   | 79.856  |
| <b>Sdk2</b>          | 131 | 0   | 2.183438 | 369  | 6.15     | 0.050458 | 0.435057 | Unclassified | chr11:113642103-113929265 | 285.163 |
| <b>Akap6</b>         | 131 | 0   | 2.183438 | 497  | 8.283333 | 0.03122  | 0        | Unclassified | chr12:53798369-54252002   | 451.634 |
| <b>Ccdc56</b>        | 130 | 0   | 2.16677  | 0    | 0        | 49.4555  | 127      | Unclassified | chr11:101139283-101142262 | 0.98    |
| <b>Dbil5</b>         | 130 | 0   | 2.16677  | 1    | 0.016667 | 0.378917 | 16.85579 | Unclassified | chr11:76029114-76032167   | 1.054   |
| <b>Gdf15</b>         | 130 | 0   | 2.16677  | 136  | 2.266667 | 2.50619  | 0.190195 | Stalled      | chr8:73153292-73157534    | 2.243   |
| <b>Pcna</b>          | 130 | 0   | 2.16677  | 130  | 2.166667 | 148.712  | 10.91753 | Stalled      | chr2:132075021-132080916  | 3.896   |
| <b>Evi2a</b>         | 130 | 132 | 2.16677  | 315  | 5.25     | 0        | 0.958969 | Elongating   | chr11:79340062-79346111   | 4.05    |
| <b>Edf1</b>          | 130 | 0   | 2.16677  | 85   | 1.416667 | 126.442  | 10.94022 | Stalled      | chr2:25411419-25417602    | 4.184   |
| <b>A130010J15Rik</b> | 130 | 0   | 2.16677  | 147  | 2.45     | 2.16562  | 7.964566 | Stalled      | chr1:194997662-195004025  | 4.364   |
| <b>Mtx1</b>          | 130 | 0   | 2.16677  | 183  | 3.05     | 21.3415  | 3.476623 | Stalled      | chr3:89013003-89020257    | 5.255   |
| <b>Hnrpd1</b>        | 130 | 0   | 2.16677  | 319  | 5.316667 | 38.3244  | 6.989495 | Stalled      | chr5:100462597-100470241  | 5.645   |
| <b>Rhot2</b>         | 130 | 0   | 2.16677  | 136  | 2.266667 | 20.4023  | 7.290536 | Stalled      | chr17:25975782-25983796   | 6.015   |
| <b>B4gal3</b>        | 130 | 0   | 2.16677  | 97   | 1.616667 | 8.3475   | 14.5511  | Stalled      | chr1:173198458-173207026  | 6.569   |
| <b>Cops7a</b>        | 130 | 0   | 2.16677  | 153  | 2.55     | 23.8402  | 19.59796 | Stalled      | chr6:124908826-124917415  | 6.59    |
| <b>Ap4m1</b>         | 130 | 0   | 2.16677  | 160  | 2.666667 | 7.76975  | 11.35485 | Stalled      | chr5:138611248-138619913  | 6.666   |

|                      |     |     |          |      |          |          |          |              |                           |         |
|----------------------|-----|-----|----------|------|----------|----------|----------|--------------|---------------------------|---------|
| <b>Exosc8</b>        | 130 | 0   | 2.16677  | 174  | 2.9      | 34.9066  | 14.27392 | Stalled      | chr3:54532600-54541286    | 6.687   |
| <b>Zfp446</b>        | 130 | 0   | 2.16677  | 49   | 0.816667 | 2.65837  | 16.84607 | Stalled      | chr7:13561196-13571065    | 7.87    |
| <b>Med21</b>         | 130 | 0   | 2.16677  | 34   | 0.566667 | 7.11425  | 64.88353 | Stalled      | chr6:146589100-146599122  | 8.023   |
| <b>Pa2g4</b>         | 130 | 0   | 2.16677  | 369  | 6.15     | 116.176  | 7.89106  | Stalled      | chr10:127994821-128004990 | 8.17    |
| <b>Zfp661</b>        | 130 | 0   | 2.16677  | 20   | 0.333333 | 1.02042  | 19.10168 | Stalled      | chr2:127401268-127412413  | 9.146   |
| <b>Wdr77</b>         | 130 | 0   | 2.16677  | 220  | 3.666667 | 10.0803  | 17.25403 | Stalled      | chr3:105760415-105772678  | 10.264  |
| <b>Taldo1</b>        | 130 | 0   | 2.16677  | 118  | 1.966667 | 70.5597  | 12.22176 | Stalled      | chr7:148576109-148588867  | 10.759  |
| <b>Ercc1</b>         | 130 | 0   | 2.16677  | 288  | 4.8      | 11.9992  | 5.14947  | Stalled      | chr7:19928419-19941873    | 11.455  |
| <b>Engase</b>        | 130 | 0   | 2.16677  | 84   | 1.4      | 2.72135  | 14.39815 | Stalled      | chr11:118336273-118350512 | 12.24   |
| <b>Map4k2</b>        | 130 | 0   | 2.16677  | 237  | 3.95     | 34.8892  | 3.089154 | Stalled      | chr19:6339249-6353527     | 12.279  |
| <b>Cercam</b>        | 130 | 0   | 2.16677  | 83   | 1.383333 | 1.7512   | 10.87838 | Stalled      | chr2:29723013-29738360    | 13.348  |
| <b>Irgc1</b>         | 130 | 0   | 2.16677  | 42   | 0.7      | 0.307984 | 20.27002 | Stalled      | chr7:25216944-25232701    | 13.758  |
| <b>Pla2g15</b>       | 130 | 0   | 2.16677  | 69   | 1.15     | 8.0502   | 23.62093 | Stalled      | chr8:108672298-108688615  | 14.318  |
| <b>Evi2b</b>         | 130 | 134 | 2.16677  | 796  | 13.26667 | 28.5447  | 1.975354 | Elongating   | chr11:79326886-79346091   | 17.206  |
| <b>Atp5f1</b>        | 130 | 0   | 2.16677  | 410  | 6.833333 | 69.234   | 1.614153 | Elongating   | chr3:105745780-105765166  | 17.387  |
| <b>Zfp369</b>        | 130 | 0   | 2.16677  | 81   | 1.35     | 2.89878  | 33.54916 | Stalled      | chr13:65378161-65399103   | 18.943  |
| <b>Asb1</b>          | 130 | 0   | 2.16677  | 109  | 1.816667 | 2.75571  | 21.00338 | Stalled      | chr1:93435141-93456167    | 19.027  |
| <b>Usp42</b>         | 130 | 0   | 2.16677  | 261  | 4.35     | 3.36646  | 20.58765 | Stalled      | chr5:144471194-144495149  | 21.956  |
| <b>Egln3</b>         | 130 | 0   | 2.16677  | 62   | 1.033333 | 4.58926  | 8.067222 | Stalled      | chr12:55279968-55306861   | 24.894  |
| <b>Dhrs7b</b>        | 130 | 0   | 2.16677  | 400  | 6.666667 | 9.64259  | 14.5192  | Stalled      | chr11:60642188-60671648   | 27.461  |
| <b>Sfrs18</b>        | 130 | 0   | 2.16677  | 366  | 6.1      | 20.6315  | 9.347713 | Stalled      | chr4:21772729-21803622    | 28.894  |
| <b>Zfp282</b>        | 130 | 0   | 2.16677  | 366  | 6.1      | 5.96746  | 11.56627 | Stalled      | chr6:47825553-47858483    | 30.931  |
| <b>Lig1</b>          | 130 | 0   | 2.16677  | 795  | 13.25    | 42.2361  | 10.78153 | Stalled      | chr7:13862174-13896776    | 32.603  |
| <b>Tom1</b>          | 130 | 0   | 2.16677  | 169  | 2.816667 | 2.4189   | 18.72066 | Stalled      | chr8:77555584-77594020    | 36.437  |
| <b>Rtel1</b>         | 130 | 0   | 2.16677  | 756  | 12.6     | 6.86812  | 7.931974 | Stalled      | chr2:181052428-181091320  | 36.893  |
| <b>6330403A02Rik</b> | 130 | 0   | 2.16677  | 94   | 1.566667 | 0.12284  | 2.714313 | Unclassified | chr1:182364365-182415635  | 49.271  |
| <b>Ube3a</b>         | 130 | 0   | 2.16677  | 422  | 7.033333 | 6.48903  | 80.53052 | Stalled      | chr7:66482119-66562097    | 77.979  |
| <b>Mfhas1</b>        | 130 | 0   | 2.16677  | 1205 | 20.08333 | 8.9498   | 5.737297 | Stalled      | chr8:36648851-36742503    | 91.653  |
| <b>Cacna2d2</b>      | 130 | 0   | 2.16677  | 320  | 5.333333 | 0.392617 | 0.57291  | Unclassified | chr9:107300210-107431674  | 129.465 |
| <b>Nek7</b>          | 130 | 0   | 2.16677  | 1188 | 19.8     | 9.2776   | 28.7836  | Stalled      | chr1:140381290-140518273  | 134.984 |
| <b>Birc6</b>         | 130 | 0   | 2.16677  | 1838 | 30.63333 | 9.17886  | 40.48843 | Stalled      | chr17:74925634-75103113   | 175.48  |
| <b>Ch11</b>          | 130 | 78  | 2.16677  | 122  | 2.033333 | 0.036377 | 1.933445 | Unclassified | chr6:103458869-103683029  | 222.161 |
| <b>Nf1</b>           | 130 | 134 | 2.16677  | 1794 | 29.9     | 0.694499 | 13.36855 | Stalled      | chr11:79151393-79395111   | 241.719 |
| <b>Frm4a</b>         | 130 | 0   | 2.16677  | 569  | 9.483333 | 0.175367 | 0        | Unclassified | chr2:4071917-4534988      | 461.072 |
| <b>Mrp153</b>        | 129 | 0   | 2.150103 | 0    | 0        | 0        | 295      | Unclassified | chr6:83057101-83059926    | 0.826   |
| <b>Mrps7</b>         | 129 | 0   | 2.150103 | 246  | 4.1      | 55.5476  | 4.601871 | Stalled      | chr11:115463464-115468938 | 3.475   |
| <b>Tnfrsf14</b>      | 129 | 0   | 2.150103 | 13   | 0.216667 | 0.869882 | 4.206037 | Stalled      | chr17:57328914-57335609   | 4.696   |
| <b>Jagn1</b>         | 129 | 0   | 2.150103 | 119  | 1.983333 | 17.6779  | 8.51195  | Stalled      | chr6:113390628-113398221  | 5.594   |
| <b>Ctdsp1</b>        | 129 | 0   | 2.150103 | 230  | 3.833333 | 24.4468  | 3.542251 | Stalled      | chr1:74436182-74443851    | 5.67    |
| <b>Gtf2h4</b>        | 129 | 0   | 2.150103 | 83   | 1.383333 | 10.319   | 3.711069 | Stalled      | chr17:35804683-35812627   | 5.945   |
| <b>Dus1l</b>         | 129 | 0   | 2.150103 | 310  | 5.166667 | 27.0714  | 5.015639 | Stalled      | chr11:120650515-120659709 | 7.195   |
| <b>Ninj1</b>         | 129 | 0   | 2.150103 | 109  | 1.816667 | 9.59872  | 13.33789 | Stalled      | chr13:49280915-49291620   | 8.706   |
| <b>Wdr18</b>         | 129 | 0   | 2.150103 | 366  | 6.1      | 17.3821  | 2.618622 | Elongating   | chr10:79420896-79431991   | 9.096   |
| <b>Dmpk</b>          | 129 | 0   | 2.150103 | 45   | 0.75     | 0.561052 | 1.984918 | Unclassified | chr7:19667343-19678451    | 9.109   |
| <b>Cntd1</b>         | 129 | 0   | 2.150103 | 128  | 2.133333 | 0.507498 | 7.03663  | Stalled      | chr11:101138516-101150015 | 9.5     |
| <b>Cd164</b>         | 129 | 0   | 2.150103 | 200  | 3.333333 | 33.3462  | 24.43894 | Stalled      | chr10:41237305-41250848   | 11.544  |
| <b>Git1</b>          | 129 | 0   | 2.150103 | 306  | 5.1      | 12.5429  | 4.979635 | Stalled      | chr11:77304913-77321276   | 14.364  |
| <b>Lrrc56</b>        | 129 | 0   | 2.150103 | 35   | 0.583333 | 0.782118 | 6.826651 | Stalled      | chr7:148379042-148395954  | 14.913  |
| <b>Ap1m2</b>         | 129 | 0   | 2.150103 | 60   | 1        | 0.773263 | 1.674056 | Unclassified | chr9:21099900-21118777    | 16.878  |
| <b>Sf3a3</b>         | 129 | 0   | 2.150103 | 332  | 5.533333 | 43.7935  | 7.697908 | Stalled      | chr4:124390104-124409666  | 17.563  |
| <b>Tbc1d20</b>       | 129 | 0   | 2.150103 | 323  | 5.383333 | 15.4687  | 11.33764 | Stalled      | chr2:152117607-152138326  | 18.72   |
| <b>Ubi7</b>          | 129 | 0   | 2.150103 | 143  | 2.383333 | 17.8166  | 41.44551 | Stalled      | chr9:57756792-57777775    | 18.984  |
| <b>Ivns1abp</b>      | 129 | 0   | 2.150103 | 532  | 8.866667 | 55.7509  | 15.37384 | Stalled      | chr1:153189627-153211575  | 19.949  |
| <b>Sec24c</b>        | 129 | 0   | 2.150103 | 776  | 12.93333 | 30.6408  | 8.298203 | Stalled      | chr14:21491542-21514072   | 20.531  |
| <b>Fah</b>           | 129 | 0   | 2.150103 | 147  | 2.45     | 12.4812  | 8.303434 | Stalled      | chr7:91733669-91756452    | 20.784  |
| <b>5730403B10Rik</b> | 129 | 0   | 2.150103 | 311  | 5.183333 | 3.94948  | 13.68654 | Stalled      | chr16:4765460-4791935     | 24.476  |
| <b>Mambal</b>        | 129 | 0   | 2.150103 | 452  | 7.533333 | 12.9763  | 13.84535 | Stalled      | chr2:157191329-15722498   | 29.17   |
| <b>Matr3</b>         | 129 | 0   | 2.150103 | 664  | 11.06667 | 10.6683  | 29.56072 | Stalled      | chr18:35719811-35751699   | 29.889  |
| <b>Rhoq</b>          | 129 | 0   | 2.150103 | 725  | 12.08333 | 7.00669  | 5.434451 | Stalled      | chr17:87360450-87399409   | 36.96   |
| <b>Arl8b</b>         | 129 | 0   | 2.150103 | 513  | 8.55     | 12.9944  | 14.78505 | Stalled      | chr6:108731052-108773717  | 40.666  |
| <b>Actr2</b>         | 129 | 0   | 2.150103 | 1284 | 21.4     | 53.0126  | 20.21399 | Stalled      | chr11:19962308-20014954   | 50.647  |
| <b>Rasgrp3</b>       | 129 | 56  | 2.150103 | 491  | 8.183333 | 4.43765  | 13.10014 | Stalled      | chr17:75862877-75928385   | 63.509  |
| <b>Wif1</b>          | 129 | 0   | 2.150103 | 48   | 0.8      | 0.926068 | 4.043295 | Unclassified | chr10:120469059-120537698 | 66.64   |
| <b>Baiap211</b>      | 129 | 0   | 2.150103 | 236  | 3.933333 | 0.512969 | 1.690665 | Unclassified | chr5:145025393-145120981  | 93.589  |
| <b>Ankrd6</b>        | 129 | 0   | 2.150103 | 266  | 4.433333 | 0.543543 | 7.080888 | Stalled      | chr4:32891009-33039801    | 146.793 |
| <b>Slc39a11</b>      | 129 | 0   | 2.150103 | 1619 | 26.98333 | 6.32807  | 16.66673 | Stalled      | chr11:113106168-113429129 | 320.962 |
| <b>Fv1</b>           | 128 | 0   | 2.133436 | 5    | 0.083333 | 12.6646  | 7.788515 | Unclassified | chr4:147241087-147244467  | 1.381   |
| <b>1810043H04Rik</b> | 128 | 0   | 2.133436 | 8    | 0.133333 | 45.6001  | 12.97786 | Unclassified | chr11:119958247-119961738 | 1.492   |
| <b>BC029214</b>      | 128 | 0   | 2.133436 | 16   | 0.266667 | 11.488   | 7.248555 | Unclassified | chr2:25315007-25318614    | 1.608   |
| <b>Spryd4</b>        | 128 | 0   | 2.133436 | 21   | 0.35     | 8.97902  | 7.165403 | Unclassified | chr10:127646965-127650850 | 1.886   |
| <b>Apex1</b>         | 128 | 0   | 2.133436 | 152  | 2.533333 | 71.4808  | 3.157074 | Stalled      | chr14:51542695-51546813   | 2.119   |
| <b>Gsg2</b>          | 128 | 0   | 2.133436 | 23   | 0.383333 | 15.5286  | 17.08009 | Stalled      | chr11:72948986-72953796   | 2.811   |
| <b>Ankrd37</b>       | 128 | 0   | 2.133436 | 17   | 0.283333 | 25.5282  | 28.01478 | Stalled      | chr8:47082261-47087204    | 2.944   |
| <b>Ccdc87</b>        | 128 | 0   | 2.133436 | 1    | 0.016667 | 2.34124  | 44.45638 | Stalled      | chr19:4837365-4842528     | 3.164   |
| <b>Coro1b</b>        | 128 | 5   | 2.133436 | 240  | 4        | 62.8247  | 1.861475 | Elongating   | chr19:4146662-4154035     | 5.374   |
| <b>Snai3</b>         | 128 | 0   | 2.133436 | 15   | 0.25     | 0.354665 | 2.678641 | Unclassified | chr8:124978105-124986592  | 6.488   |
| <b>Zfp689</b>        | 128 | 0   | 2.133436 | 96   | 1.6      | 6.12034  | 14.11174 | Stalled      | chr7:134585649-134594672  | 7.024   |
| <b>Gcat</b>          | 128 | 24  | 2.133436 | 39   | 0.65     | 18.51    | 21.81101 | Stalled      | chr15:78859303-78868786   | 7.484   |
| <b>Pycr1</b>         | 128 | 0   | 2.133436 | 89   | 1.483333 | 3.72673  | 6.310129 | Stalled      | chr11:120497025-120506984 | 7.96    |
| <b>2410002I01Rik</b> | 128 | 0   | 2.133436 | 108  | 1.8      | 5.25635  | 13.1438  | Stalled      | chr11:119951835-119962045 | 8.211   |
| <b>Zfp672</b>        | 128 | 0   | 2.133436 | 206  | 3.433333 | 5.15885  | 10.61858 | Stalled      | chr11:58128615-58138848   | 8.234   |
| <b>Slc39a13</b>      | 128 | 0   | 2.133436 | 300  | 5        | 4.18315  | 3.384423 | Stalled      | chr2:90901947-90912378    | 8.432   |
| <b>Pif1</b>          | 128 | 0   | 2.133436 | 139  | 2.316667 | 13.6947  | 5.128292 | Stalled      | chr9:65433011-65443769    | 8.759   |
| <b>Osgep</b>         | 128 | 0   | 2.133436 | 47   | 0.783333 | 11.751   | 64.45885 | Stalled      | chr14:51535048-51546568   | 9.521   |
| <b>Cdkn2aipnl</b>    | 128 | 48  | 2.133436 | 204  | 3.4      | 34.3594  | 8.430596 | Stalled      | chr11:51779132-51790836   | 9.705   |
| <b>Prdx3</b>         | 128 | 0   | 2.133436 | 127  | 2.116667 | 31.4099  | 16.03598 | Stalled      | chr19:60939968-60952441   | 10.474  |



|                      |     |    |          |      |          |          |          |              |                           |         |
|----------------------|-----|----|----------|------|----------|----------|----------|--------------|---------------------------|---------|
| <b>2410091C18Rik</b> | 128 | 0  | 2.133436 | 66   | 1.1      | 5.97486  | 28.74353 | Stalled      | chr17:79334474-79347392   | 10.919  |
| <b>Hsh2d</b>         | 128 | 0  | 2.133436 | 484  | 8.066667 | 11.8     | 5.705146 | Stalled      | chr8:74711566-74724857    | 11.292  |
| <b>Sri</b>           | 128 | 0  | 2.133436 | 269  | 4.483333 | 41.1584  | 11.30032 | Stalled      | chr5:8054541-8069245      | 12.705  |
| <b>Vdac2</b>         | 128 | 0  | 2.133436 | 436  | 7.266667 | 52.3272  | 10.99822 | Stalled      | chr14:22648782-22665101   | 14.32   |
| <b>D10ErtD641e</b>   | 128 | 0  | 2.133436 | 299  | 4.983333 | 25.1033  | 21.27088 | Stalled      | chr10:59450656-59467860   | 15.205  |
| <b>Fcrl1</b>         | 128 | 68 | 2.133436 | 186  | 3.1      | 11.817   | 2.497818 | Elongating   | chr3:87178308-87196055    | 15.748  |
| <b>P2rx1</b>         | 128 | 0  | 2.133436 | 47   | 0.783333 | 0.152263 | 2.668547 | Unclassified | chr11:72810646-72828699   | 16.054  |
| <b>Siglec1</b>       | 128 | 0  | 2.133436 | 31   | 0.516667 | 0.094326 | 0        | Unclassified | chr2:130894956-130914501  | 17.546  |
| <b>Rbm17</b>         | 128 | 32 | 2.133436 | 304  | 5.066667 | 61.9999  | 11.18296 | Stalled      | chr2:11507065-11526826    | 17.762  |
| <b>Blvrb</b>         | 128 | 0  | 2.133436 | 72   | 1.2      | 15.5409  | 14.71136 | Stalled      | chr7:28230996-28251000    | 18.005  |
| <b>Cebpz</b>         | 128 | 0  | 2.133436 | 226  | 3.766667 | 12.6252  | 15.44903 | Stalled      | chr17:79318342-79338410   | 18.069  |
| <b>Gtf2h3</b>        | 128 | 0  | 2.133436 | 223  | 3.716667 | 6.36927  | 28.86687 | Stalled      | chr5:125027156-125047689  | 18.534  |
| <b>Pld3</b>          | 128 | 0  | 2.133436 | 298  | 4.966667 | 23.5548  | 11.75072 | Stalled      | chr7:28317036-28340131    | 21.096  |
| <b>Zh2c2</b>         | 128 | 0  | 2.133436 | 72   | 1.2      | 2.17234  | 59.25187 | Stalled      | chr1:99664755-99689548    | 22.794  |
| <b>4930422I07Rik</b> | 128 | 0  | 2.133436 | 53   | 0.883333 | 8.16922  | 15.58059 | Stalled      | chr9:88440857-88465924    | 23.068  |
| <b>Lect1</b>         | 128 | 0  | 2.133436 | 37   | 0.616667 | 0.312376 | 0.388248 | Unclassified | chr14:80037496-80063977   | 24.482  |
| <b>Eif2s1</b>        | 128 | 0  | 2.133436 | 412  | 6.866667 | 17.7849  | 17.3534  | Stalled      | chr12:79961058-79987997   | 24.94   |
| <b>Arf3</b>          | 128 | 0  | 2.133436 | 382  | 6.366667 | 34.5577  | 13.85905 | Stalled      | chr15:98568056-98595549   | 25.494  |
| <b>Gnpat</b>         | 128 | 0  | 2.133436 | 444  | 7.4      | 16.0341  | 22.59153 | Stalled      | chr8:127384932-127413957  | 27.026  |
| <b>Nbr1</b>          | 128 | 0  | 2.133436 | 225  | 3.75     | 7.84325  | 12.54127 | Stalled      | chr11:101412171-101443259 | 29.089  |
| <b>Lta4h</b>         | 128 | 0  | 2.133436 | 153  | 2.55     | 19.6863  | 31.91455 | Stalled      | chr10:92914140-92947641   | 31.502  |
| <b>Pvr12</b>         | 128 | 0  | 2.133436 | 78   | 1.3      | 1.26612  | 3.776032 | Unclassified | chr7:20301992-20336922    | 32.931  |
| <b>Fbxo21</b>        | 128 | 0  | 2.133436 | 630  | 10.5     | 5.04841  | 7.34191  | Stalled      | chr5:118424778-118460200  | 33.423  |
| <b>Lrrc48</b>        | 128 | 46 | 2.133436 | 75   | 1.25     | 0.117265 | 8.68927  | Stalled      | chr11:60164881-60207835   | 40.955  |
| <b>Rcbtb2</b>        | 128 | 0  | 2.133436 | 423  | 7.05     | 4.18871  | 5.510312 | Stalled      | chr14:73540316-73583859   | 41.544  |
| <b>Gan</b>           | 128 | 0  | 2.133436 | 509  | 8.483333 | 1.90892  | 26.3846  | Stalled      | chr8:119680034-119729086  | 47.053  |
| <b>Itgae</b>         | 128 | 0  | 2.133436 | 626  | 10.43333 | 0.456714 | 0.081918 | Stalled      | chr11:72902096-72960951   | 56.856  |
| <b>Kcnq2</b>         | 128 | 0  | 2.133436 | 95   | 1.583333 | 0.23152  | 1.145111 | Unclassified | chr2:180810283-180871930  | 59.648  |
| <b>Fbln2</b>         | 128 | 0  | 2.133436 | 102  | 1.7      | 0.060037 | 1.096755 | Unclassified | chr6:91160757-91222534    | 59.778  |
| <b>Hisppd1</b>       | 128 | 0  | 2.133436 | 258  | 4.3      | 4.403    | 47.91717 | Stalled      | chr1:99602622-99668669    | 64.048  |
| <b>Atp2c1</b>        | 128 | 0  | 2.133436 | 383  | 6.383333 | 5.8989   | 71.96081 | Stalled      | chr9:105313692-105399447  | 83.756  |
| <b>Tgfb2</b>         | 128 | 0  | 2.133436 | 2604 | 43.4     | 15.893   | 7.633995 | Stalled      | chr9:115996813-116086481  | 87.669  |
| <b>Sic12a6</b>       | 128 | 0  | 2.133436 | 810  | 13.5     | 9.30214  | 15.66035 | Stalled      | chr2:112104470-112203320  | 96.851  |
| <b>Rnf13</b>         | 128 | 0  | 2.133436 | 204  | 3.4      | 7.83006  | 57.82884 | Stalled      | chr3:57537987-57639155    | 99.169  |
| <b>Hist1h3g</b>      | 127 | 0  | 2.116768 | 0    | 0        | 0        | 428      | Unclassified | chr13:23625286-23627778   | 0.493   |
| <b>Kctd11</b>        | 127 | 0  | 2.116768 | 7    | 0.116667 | 1.58648  | 36.14685 | Stalled      | chr11:69691765-69696487   | 2.723   |
| <b>Pfah1b3</b>       | 127 | 0  | 2.116768 | 60   | 1        | 26.9102  | 2.249855 | Stalled      | chr7:26080067-26084974    | 2.908   |
| <b>Gpx4</b>          | 127 | 0  | 2.116768 | 143  | 2.383333 | 55.5694  | 3.850515 | Stalled      | chr10:79514254-79519184   | 2.931   |
| <b>Chac1</b>         | 127 | 0  | 2.116768 | 106  | 1.766667 | 10.1966  | 5.128826 | Stalled      | chr2:119174977-119180060  | 3.084   |
| <b>Fmc1</b>          | 127 | 0  | 2.116768 | 18   | 0.3      | 24.0294  | 55.03891 | Stalled      | chr6:38482860-38489449    | 4.59    |
| <b>Zfp691</b>        | 127 | 0  | 2.116768 | 30   | 0.5      | 8.6448   | 12.56228 | Stalled      | chr4:118842122-118848800  | 4.679   |
| <b>Tommm40l</b>      | 127 | 0  | 2.116768 | 42   | 0.7      | 7.45317  | 7.716295 | Stalled      | chr1:173147933-173154645  | 4.713   |
| <b>Birc5</b>         | 127 | 0  | 2.116768 | 152  | 2.533333 | 77.8321  | 15.80628 | Stalled      | chr11:117708550-117717057 | 6.508   |
| <b>Armcs</b>         | 127 | 0  | 2.116768 | 227  | 3.783333 | 11.4489  | 3.549317 | Stalled      | chr7:135378870-135388614  | 7.745   |
| <b>Pcsk4</b>         | 127 | 0  | 2.116768 | 196  | 3.266667 | 2.69597  | 0.353049 | Stalled      | chr10:79784046-79794218   | 8.173   |
| <b>Rbm14</b>         | 127 | 0  | 2.116768 | 305  | 5.083333 | 26.7739  | 15.36673 | Stalled      | chr19:4800924-4813634     | 10.711  |
| <b>Tmem161a</b>      | 127 | 0  | 2.116768 | 185  | 3.083333 | 9.96005  | 5.829299 | Stalled      | chr8:72694309-72707562    | 11.254  |
| <b>Dsn1</b>          | 127 | 0  | 2.116768 | 109  | 1.816667 | 5.09886  | 26.8916  | Stalled      | chr2:156820797-156834811  | 12.015  |
| <b>Kdelc1</b>        | 127 | 0  | 2.116768 | 35   | 0.583333 | 7.18912  | 32.30563 | Stalled      | chr1:44163390-44177618    | 12.229  |
| <b>Cctl8</b>         | 127 | 0  | 2.116768 | 420  | 7        | 59.4324  | 13.13669 | Stalled      | chr16:87483569-87498114   | 12.546  |
| <b>Stk19</b>         | 127 | 0  | 2.116768 | 148  | 2.466667 | 17.5863  | 17.65436 | Stalled      | chr17:34960937-34975848   | 12.912  |
| <b>Srcrb4d</b>       | 127 | 0  | 2.116768 | 415  | 6.916667 | 1.73625  | 0        | Stalled      | chr5:136436093-136452346  | 14.254  |
| <b>Ermap</b>         | 127 | 0  | 2.116768 | 26   | 0.433333 | 0.214028 | 0.685408 | Unclassified | chr4:118848061-118864616  | 14.556  |
| <b>Sic27a4</b>       | 127 | 0  | 2.116768 | 63   | 1.05     | 3.24228  | 6.845974 | Stalled      | chr2:29656199-29673042    | 14.844  |
| <b>Ahcy</b>          | 127 | 0  | 2.116768 | 308  | 5.133333 | 26.165   | 8.10106  | Stalled      | chr2:154885049-154902233  | 15.185  |
| <b>Carkd</b>         | 127 | 0  | 2.116768 | 534  | 8.9      | 15.0639  | 7.199036 | Stalled      | chr8:11495601-11513284    | 15.684  |
| <b>2610024G14Rik</b> | 127 | 0  | 2.116768 | 127  | 2.116667 | 18.6694  | 46.67197 | Stalled      | chr5:77723194-77741111    | 15.918  |
| <b>Sqle</b>          | 127 | 0  | 2.116768 | 324  | 5.4      | 48.4503  | 14.74211 | Stalled      | chr15:59144646-59162748   | 16.103  |
| <b>Pick1</b>         | 127 | 0  | 2.116768 | 173  | 2.883333 | 9.47811  | 14.54871 | Stalled      | chr15:79057603-79079896   | 20.294  |
| <b>Tyw3</b>          | 127 | 0  | 2.116768 | 129  | 2.15     | 2.41831  | 26.2209  | Stalled      | chr3:154239483-154262059  | 20.577  |
| <b>Smtn</b>          | 127 | 0  | 2.116768 | 242  | 4.033333 | 2.99515  | 8.774107 | Stalled      | chr11:3417525-3441295     | 21.771  |
| <b>Entpd6</b>        | 127 | 0  | 2.116768 | 329  | 5.483333 | 15.3058  | 12.99661 | Stalled      | chr2:150572816-150597410  | 22.595  |
| <b>Wfs1</b>          | 127 | 0  | 2.116768 | 484  | 8.066667 | 4.21861  | 7.309481 | Stalled      | chr5:37357342-37382221    | 22.88   |
| <b>Cd48</b>          | 127 | 70 | 2.116768 | 507  | 8.45     | 31.1511  | 9.062789 | Stalled      | chr1:173610185-173635388  | 23.204  |
| <b>Mmp17</b>         | 127 | 0  | 2.116768 | 49   | 0.816667 | 0.609776 | 6.708135 | Stalled      | chr5:130088088-130114086  | 23.999  |
| <b>Uqcrc2</b>        | 127 | 0  | 2.116768 | 270  | 4.5      | 41.2216  | 21.39998 | Stalled      | chr7:127776702-127803037  | 24.336  |
| <b>Cbs</b>           | 127 | 0  | 2.116768 | 55   | 0.916667 | 0.546803 | 7.483853 | Stalled      | chr17:31749588-31776086   | 24.499  |
| <b>Cryz</b>          | 127 | 0  | 2.116768 | 57   | 0.95     | 2.8414   | 61.57294 | Stalled      | chr3:154257975-154286146  | 26.172  |
| <b>Calu</b>          | 127 | 0  | 2.116768 | 180  | 3        | 21.7843  | 49.52415 | Stalled      | chr6:29296118-29326675    | 28.558  |
| <b>38961</b>         | 127 | 0  | 2.116768 | 297  | 4.95     | 17.4901  | 37.68129 | Stalled      | chr1:95373569-95406307    | 30.739  |
| <b>Tmem63a</b>       | 127 | 0  | 2.116768 | 289  | 4.816667 | 4.85432  | 10.73993 | Stalled      | chr1:182870648-182905235  | 32.588  |
| <b>Bcar1</b>         | 127 | 0  | 2.116768 | 82   | 1.366667 | 0.163213 | 0        | Unclassified | chr8:114234374-114269709  | 33.336  |
| <b>Bms1</b>          | 127 | 0  | 2.116768 | 391  | 6.516667 | 22.7871  | 30.01814 | Stalled      | chr6:118333398-118371435  | 36.038  |
| <b>Brpf3</b>         | 127 | 0  | 2.116768 | 337  | 5.616667 | 4.02052  | 34.53917 | Stalled      | chr17:28936070-28975734   | 37.665  |
| <b>Potr2b</b>        | 127 | 0  | 2.116768 | 392  | 6.533333 | 15.9008  | 41.11625 | Stalled      | chr5:77737508-7778352     | 38.845  |
| <b>Aacs</b>          | 127 | 0  | 2.116768 | 1099 | 18.31667 | 39.1333  | 10.42171 | Stalled      | chr5:125954242-125997773  | 41.532  |
| <b>Cul9</b>          | 127 | 0  | 2.116768 | 289  | 4.816667 | 1.6711   | 22.94362 | Stalled      | chr17:46637553-46685337   | 45.785  |
| <b>Zfc3h1</b>        | 127 | 0  | 2.116768 | 523  | 8.716667 | 9.7143   | 37.05264 | Stalled      | chr10:114820014-114869827 | 47.814  |
| <b>Cyld</b>          | 127 | 0  | 2.116768 | 593  | 9.883333 | 6.2306   | 17.5863  | Stalled      | chr8:91218926-91275844    | 54.919  |
| <b>Ccdc109b</b>      | 127 | 0  | 2.116768 | 63   | 1.05     | 2.35268  | 6.014806 | Unclassified | chr3:129617877-129675124  | 55.248  |
| <b>Bard1</b>         | 127 | 0  | 2.116768 | 709  | 11.81667 | 2.24884  | 32.30534 | Stalled      | chr1:71074108-71151546    | 75.439  |
| <b>Nphp4</b>         | 127 | 0  | 2.116768 | 283  | 4.716667 | 1.56742  | 21.06573 | Stalled      | chr4:151850250-151937293  | 85.044  |
| <b>Rpgr1p1</b>       | 127 | 0  | 2.116768 | 116  | 1.933333 | 0.424718 | 27.49526 | Stalled      | chr8:93740928-93839121    | 96.194  |
| <b>Finb</b>          | 127 | 0  | 2.116768 | 769  | 12.81667 | 13.2211  | 16.32834 | Stalled      | chr14:8648470-8784101     | 133.632 |
| <b>Fto</b>           | 127 | 0  | 2.116768 | 1848 | 30.8     | 8.77655  | 12.05465 | Stalled      | chr8:93835423-94192332    | 354.91  |
| <b>Tnrc18</b>        | 127 | 0  | 2.116768 | 1315 | 21.91667 | 7.99859  | 5.130091 | Stalled      | chr5:143200557-143581066  | 378.51  |

|                      |     |   |          |      |          |          |          |              |                           |          |
|----------------------|-----|---|----------|------|----------|----------|----------|--------------|---------------------------|----------|
| <b>Tmem203</b>       | 126 | 0 | 2.100101 | 0    | 0        | 26.2161  | 283      | Unclassified | chr2:25108958-25111872    | 0.915    |
| <b>Brp16</b>         | 126 | 0 | 2.100101 | 68   | 1.133333 | 15.6698  | 4.86003  | Stalled      | chr15:76197327-76201841   | 2.515    |
| <b>Gper</b>          | 126 | 0 | 2.100101 | 35   | 0.583333 | 0        | 0.375029 | Unclassified | chr5:139897132-139903752  | 4.621    |
| <b>Pdxp</b>          | 126 | 0 | 2.100101 | 53   | 0.883333 | 6.31605  | 7.666667 | Stalled      | chr15:78742348-78749947   | 5.6      |
| <b>E430028B21Rik</b> | 126 | 0 | 2.100101 | 95   | 1.583333 | 18.3848  | 13.04534 | Stalled      | chr14:27483602-27491332   | 5.731    |
| <b>Yars2</b>         | 126 | 0 | 2.100101 | 80   | 1.333333 | 15.1667  | 24.26751 | Stalled      | chr16:16301074-16309721   | 6.648    |
| <b>Eif2b2</b>        | 126 | 0 | 2.100101 | 131  | 2.183333 | 51.8275  | 9.814538 | Stalled      | chr12:86558462-86567578   | 7.117    |
| <b>Srms</b>          | 126 | 0 | 2.100101 | 17   | 0.283333 | 2.31958  | 1.959763 | Unclassified | chr2:180940267-180949876  | 7.61     |
| <b>Txn14b</b>        | 126 | 0 | 2.100101 | 47   | 0.783333 | 2.30037  | 18.56056 | Stalled      | chr8:112087885-112097951  | 8.067    |
| <b>Pthr2</b>         | 126 | 0 | 2.100101 | 469  | 7.816667 | 9.13121  | 4.173591 | Stalled      | chr11:86495484-86505959   | 8.476    |
| <b>Exosc5</b>        | 126 | 0 | 2.100101 | 270  | 4.5      | 41.7661  | 6.153591 | Stalled      | chr7:26442171-26453050    | 8.88     |
| <b>Pga5</b>          | 126 | 0 | 2.100101 | 15   | 0.25     | 0.045255 | 1.755494 | Unclassified | chr19:10743446-10754561   | 9.116    |
| <b>Mmp11</b>         | 126 | 0 | 2.100101 | 105  | 1.75     | 1.04933  | 2.91096  | Stalled      | chr10:75385968-75397208   | 9.241    |
| <b>Mlt11</b>         | 126 | 0 | 2.100101 | 241  | 4.016667 | 8.86865  | 20.67048 | Stalled      | chr3:95022465-95034599    | 10.135   |
| <b>Ndor1</b>         | 126 | 0 | 2.100101 | 377  | 6.283333 | 8.40764  | 7.025277 | Stalled      | chr2:25100338-25112934    | 10.597   |
| <b>Sfrs3</b>         | 126 | 0 | 2.100101 | 675  | 11.25    | 32.816   | 9.30285  | Stalled      | chr17:29167617-29180311   | 10.695   |
| <b>Neur14</b>        | 126 | 0 | 2.100101 | 356  | 5.933333 | 9.77496  | 5.39923  | Stalled      | chr11:69713379-69727324   | 11.946   |
| <b>Upf3a</b>         | 126 | 0 | 2.100101 | 121  | 2.016667 | 23.1774  | 48.53062 | Stalled      | chr8:13783614-13798537    | 12.924   |
| <b>Pcnp</b>          | 126 | 0 | 2.100101 | 259  | 4.316667 | 12.9526  | 18.6849  | Stalled      | chr16:56015620-56031830   | 14.211   |
| <b>Mettl6</b>        | 126 | 0 | 2.100101 | 261  | 4.35     | 10.3764  | 17.9744  | Stalled      | chr14:32291983-32310163   | 16.181   |
| <b>Hspa9</b>         | 126 | 0 | 2.100101 | 515  | 8.583333 | 80.0475  | 10.14628 | Stalled      | chr18:35097068-35116005   | 16.938   |
| <b>Ifngr1</b>        | 126 | 0 | 2.100101 | 189  | 3.15     | 10.8426  | 19.59066 | Stalled      | chr10:19309763-19330031   | 18.269   |
| <b>Tbc1d7</b>        | 126 | 0 | 2.100101 | 72   | 1.2      | 3.18948  | 78.68624 | Stalled      | chr13:43247112-43268728   | 19.617   |
| <b>Snapc1</b>        | 126 | 0 | 2.100101 | 88   | 1.466667 | 7.68449  | 25.89241 | Stalled      | chr12:75063516-75085807   | 20.292   |
| <b>Riok2</b>         | 126 | 0 | 2.100101 | 253  | 4.216667 | 9.34579  | 21.17842 | Stalled      | chr17:17509295-17531862   | 20.568   |
| <b>Klhl28</b>        | 126 | 0 | 2.100101 | 78   | 1.3      | 2.73855  | 64.90451 | Stalled      | chr12:66043426-66068523   | 23.098   |
| <b>Slc13a5</b>       | 126 | 0 | 2.100101 | 20   | 0.333333 | 0.233757 | 2.707001 | Unclassified | chr11:72055496-72082106   | 24.611   |
| <b>Pafah2</b>        | 126 | 0 | 2.100101 | 83   | 1.383333 | 0.869181 | 4.253193 | Unclassified | chr4:133950274-133983325  | 31.052   |
| <b>Aspscr1</b>       | 126 | 0 | 2.100101 | 674  | 11.23333 | 12.4099  | 15.99971 | Stalled      | chr11:120532286-120570758 | 36.473   |
| <b>Aco2</b>          | 126 | 0 | 2.100101 | 1309 | 21.81667 | 46.4654  | 7.96076  | Stalled      | chr15:81700892-81745567   | 42.676   |
| <b>Brc1</b>          | 126 | 0 | 2.100101 | 474  | 7.9      | 4.52798  | 13.68681 | Stalled      | chr11:101350077-101415269 | 63.193   |
| <b>Nup98</b>         | 126 | 0 | 2.100101 | 713  | 11.88333 | 6.90413  | 25.95811 | Stalled      | chr7:109282716-109360634  | 75.919   |
| <b>Kif1a</b>         | 126 | 0 | 2.100101 | 123  | 2.05     | 0.020237 | 0.81964  | Unclassified | chr1:94912032-95000442    | 86.411   |
| <b>Arhgap17</b>      | 126 | 0 | 2.100101 | 1359 | 22.65    | 9.76443  | 13.81744 | Stalled      | chr7:130422662-130515429  | 90.768   |
| <b>1810027010Rik</b> | 125 | 0 | 2.083433 | 1    | 0.016667 | 46.5009  | 5.816425 | Unclassified | chr11:69650026-69653060   | 1.035    |
| <b>Gpx1</b>          | 125 | 0 | 2.083433 | 1    | 0.016667 | 230.243  | 28.54221 | Unclassified | chr9:108239606-108242671  | 1.066    |
| <b>Icam4</b>         | 125 | 0 | 2.083433 | 8    | 0.133333 | 2.85278  | 3.352941 | Unclassified | chr9:20831816-20834975    | 1.16     |
| <b>Rplp1</b>         | 125 | 0 | 2.083433 | 17   | 0.283333 | 1412.03  | 6.552731 | Unclassified | chr9:61761089-61764317    | 1.229    |
| <b>Gp9</b>           | 125 | 0 | 2.083433 | 2    | 0.033333 | 0.047409 | 1.672755 | Unclassified | chr6:87726129-87729756    | 1.628    |
| <b>Ddt</b>           | 125 | 0 | 2.083433 | 20   | 0.333333 | 107.692  | 8.595611 | Stalled      | chr10:75233977-75238119   | 2.143    |
| <b>Nat11</b>         | 125 | 0 | 2.083433 | 30   | 0.5      | 0.810738 | 2.766319 | Stalled      | chr7:4871852-4876608      | 2.757    |
| <b>Tspan31</b>       | 125 | 0 | 2.083433 | 235  | 3.916667 | 28.4387  | 0.682719 | Elongating   | chr10:12650435-126509317  | 2.973    |
| <b>Ripk3</b>         | 125 | 0 | 2.083433 | 23   | 0.383333 | 20.3497  | 10.62707 | Stalled      | chr14:56403832-56409694   | 3.863    |
| <b>Zfp3612</b>       | 125 | 0 | 2.083433 | 308  | 5.133333 | 25.4696  | 4.320944 | Stalled      | chr17:84583268-84589287   | 4.02     |
| <b>Ftsj2</b>         | 125 | 0 | 2.083433 | 52   | 0.866667 | 6.79378  | 12.03339 | Stalled      | chr5:140803627-140809852  | 4.226    |
| <b>1700123020Rik</b> | 125 | 0 | 2.083433 | 48   | 0.8      | 18.6223  | 22.51614 | Stalled      | chr14:55303007-55309579   | 4.573    |
| <b>Zfp319</b>        | 125 | 0 | 2.083433 | 110  | 1.833333 | 4.9264   | 10.9058  | Stalled      | chr8:97850035-97857850    | 5.816    |
| <b>Nudt1</b>         | 125 | 0 | 2.083433 | 217  | 3.616667 | 14.3147  | 4.85793  | Stalled      | chr5:140805875-140814089  | 6.215    |
| <b>Npdcc1</b>        | 125 | 0 | 2.083433 | 17   | 0.283333 | 0.460902 | 0.966046 | Unclassified | chr2:25256602-25265014    | 6.413    |
| <b>Hexim2</b>        | 125 | 0 | 2.083433 | 65   | 1.083333 | 4.09373  | 12.78857 | Stalled      | chr11:102992652-103001222 | 6.571    |
| <b>5730494N06Rik</b> | 125 | 0 | 2.083433 | 175  | 2.916667 | 3.82312  | 21.37219 | Stalled      | chr2:132065229-132075524  | 8.296    |
| <b>Bap1</b>          | 125 | 0 | 2.083433 | 196  | 3.266667 | 19.4428  | 15.9125  | Stalled      | chr14:32062674-32073115   | 8.442    |
| <b>Hnrnp3</b>        | 125 | 0 | 2.083433 | 175  | 2.916667 | 18.2331  | 20.46895 | Stalled      | chr10:62477411-62488597   | 9.187    |
| <b>Scn1b</b>         | 125 | 0 | 2.083433 | 21   | 0.35     | 0.507577 | 4.336259 | Unclassified | chr7:31901542-31913964    | 10.423   |
| <b>Hnrnpk</b>        | 125 | 0 | 2.083433 | 512  | 8.533333 | 89.5489  | 12.91333 | Stalled      | chr13:58493311-58505877   | 10.567   |
| <b>Sart1</b>         | 125 | 0 | 2.083433 | 432  | 7.2      | 23.1348  | 9.625168 | Stalled      | chr19:5377522-5390703     | 11.182   |
| <b>Lrwd1</b>         | 125 | 0 | 2.083433 | 374  | 6.233333 | 23.2476  | 5.444807 | Stalled      | chr5:136598935-136613944  | 13.01    |
| <b>Tmem41a</b>       | 125 | 0 | 2.083433 | 27   | 0.45     | 2.447    | 19.93972 | Stalled      | chr16:21934399-21949617   | 13.219   |
| <b>Pthf7</b>         | 125 | 0 | 2.083433 | 84   | 1.4      | 6.6723   | 58.64705 | Stalled      | chr14:32050881-32066404   | 13.524   |
| <b>Tardbp</b>        | 125 | 0 | 2.083433 | 1166 | 19.43333 | 30.2481  | 4.178472 | Stalled      | chr4:147986490-148003105  | 14.616   |
| <b>Psmg4</b>         | 125 | 0 | 2.083433 | 78   | 1.3      | 48.0886  | 58.3605  | Stalled      | chr13:34252845-34270041   | 15.197   |
| <b>Ankrd52</b>       | 125 | 0 | 2.083433 | 447  | 7.45     | 20.5894  | 4.117835 | Stalled      | chr10:127812179-127831062 | 16.884   |
| <b>Wrap53</b>        | 125 | 0 | 2.083433 | 252  | 4.2      | 17.409   | 6.849158 | Stalled      | chr11:69375255-69394826   | 17.572   |
| <b>Aifm3</b>         | 125 | 0 | 2.083433 | 65   | 1.083333 | 0.202592 | 3.695597 | Stalled      | chr16:17487783-17507575   | 17.793   |
| <b>Lrrc43</b>        | 125 | 0 | 2.083433 | 48   | 0.8      | 0.213083 | 0.542827 | Unclassified | chr5:123937333-123958213  | 18.881   |
| <b>Ddx27</b>         | 125 | 0 | 2.083433 | 682  | 11.36667 | 38.4832  | 5.718121 | Stalled      | chr2:166838812-166860445  | 19.634   |
| <b>Mmp15</b>         | 125 | 0 | 2.083433 | 53   | 0.883333 | 0.17971  | 0.283377 | Unclassified | chr8:97874236-97898193    | 21.958   |
| <b>Endod1</b>        | 125 | 0 | 2.083433 | 99   | 1.65     | 2.74907  | 20.33179 | Stalled      | chr9:14158433-14187686    | 27.254   |
| <b>Ephx1</b>         | 125 | 0 | 2.083433 | 107  | 1.783333 | 3.79758  | 10.8616  | Stalled      | chr1:182919686-182949626  | 27.941   |
| <b>Amz1</b>          | 125 | 0 | 2.083433 | 134  | 2.233333 | 0.434371 | 0.868966 | Unclassified | chr5:141198080-141229266  | 29.187   |
| <b>Amica1</b>        | 125 | 0 | 2.083433 | 82   | 1.366667 | 0.844689 | 8.734934 | Stalled      | chr9:44885265-44916614    | 29.35    |
| <b>Kdm2b</b>         | 125 | 0 | 2.083433 | 653  | 10.88333 | 22.3869  | 5.931434 | Stalled      | chr5:123320684-123352359  | 29.676   |
| <b>Padi1</b>         | 125 | 0 | 2.083433 | 144  | 2.4      | 1.39699  | 0.723531 | Unclassified | chr4:140368895-140403693  | 32.799   |
| <b>Pask</b>          | 125 | 0 | 2.083433 | 194  | 3.233333 | 3.06429  | 11.43453 | Stalled      | chr1:95206013-95241365    | 33.353   |
| <b>Dhfr</b>          | 125 | 0 | 2.083433 | 484  | 8.066667 | 4.76076  | 18.46043 | Stalled      | chr13:93122737-93159008   | 34.272   |
| <b>Atg16l1</b>       | 125 | 0 | 2.083433 | 763  | 12.71667 | 7.06712  | 7.970835 | Stalled      | chr1:89650645-89688997    | 36.353   |
| <b>Tnfrsf8</b>       | 125 | 0 | 2.083433 | 778  | 12.96667 | 22.12    | 6.947066 | Stalled      | chr18:50211173-50251433   | 38.261   |
| <b>Erc4</b>          | 125 | 0 | 2.083433 | 462  | 7.7      | 3.27488  | 16.23854 | Stalled      | chr16:13107828-13152102   | 42.275   |
| <b>Rab10</b>         | 125 | 0 | 2.083433 | 760  | 12.66667 | 24.3368  | 29.73896 | Stalled      | chr12:3247429-3311969     | 62.541   |
| <b>Stx18</b>         | 125 | 0 | 2.083433 | 773  | 12.88333 | 14.5699  | 15.54983 | Stalled      | chr5:38428473-38528057    | 97.585   |
| <b>Msh3</b>          | 125 | 0 | 2.083433 | 681  | 11.35    | 4.2056   | 52.66256 | Stalled      | chr13:92981835-93126958   | 143.124  |
| <b>Gab2</b>          | 125 | 0 | 2.083433 | 198  | 3.3      | 0.320082 | 6.932136 | Unclassified | chr7:104228260-104457461  | 227.202  |
| <b>1700112E06Rik</b> | 125 | 0 | 2.083433 | 746  | 12.43333 | 0.379847 | 3.487338 | Unclassified | chr14:22836933-23875310   | 1036.378 |
| <b>Utp3</b>          | 124 | 0 | 2.066766 | 17   | 0.283333 | 53.5739  | 11.28622 | Unclassified | chr5:88981507-88985108    | 1.602    |
| <b>Mrps26</b>        | 124 | 0 | 2.066766 | 12   | 0.2      | 43.5037  | 15.16734 | Unclassified | chr2:130387492-130391130  | 1.639    |
| <b>Rab24</b>         | 124 | 0 | 2.066766 | 111  | 1.85     | 24.6249  | 3.977909 | Stalled      | chr13:55420583-55425341   | 2.759    |

|                      |     |    |          |      |          |          |          |              |                           |         |
|----------------------|-----|----|----------|------|----------|----------|----------|--------------|---------------------------|---------|
| <b>Fzd2</b>          | 124 | 0  | 2.066766 | 6    | 0.1      | 0.457354 | 0.30467  | Unclassified | chr11:102463744-102469372 | 3.629   |
| <b>6430527G18Rik</b> | 124 | 0  | 2.066766 | 87   | 1.45     | 11.4729  | 8.463651 | Stalled      | chr12:88221652-88227764   | 4.113   |
| <b>Neu1</b>          | 124 | 0  | 2.066766 | 104  | 1.733333 | 10.9137  | 4.025842 | Stalled      | chr17:35066197-35074242   | 6.046   |
| <b>Rps6kb2</b>       | 124 | 0  | 2.066766 | 461  | 7.683333 | 11.7653  | 0.983314 | Elongating   | chr19:4156976-4165245     | 6.27    |
| <b>BC028528</b>      | 124 | 0  | 2.066766 | 50   | 0.833333 | 10.1753  | 5.963366 | Stalled      | chr3:95688895-95697853    | 6.959   |
| <b>Rpain</b>         | 124 | 0  | 2.066766 | 368  | 6.133333 | 12.0704  | 5.315332 | Stalled      | chr11:70781714-70791306   | 7.593   |
| <b>Arpc5l</b>        | 124 | 0  | 2.066766 | 462  | 7.7      | 70.8699  | 7.55781  | Stalled      | chr2:38861658-38871392    | 7.735   |
| <b>Rab37</b>         | 124 | 0  | 2.066766 | 106  | 1.766667 | 1.63386  | 4.186019 | Stalled      | chr11:115013491-115023554 | 8.064   |
| <b>Zfp771</b>        | 124 | 0  | 2.066766 | 636  | 10.6     | 24.7027  | 4.499929 | Stalled      | chr7:134386039-134398315  | 10.277  |
| <b>Tbrg4</b>         | 124 | 0  | 2.066766 | 1018 | 16.96667 | 27.5604  | 5.346311 | Stalled      | chr11:6515600-6528070     | 10.471  |
| <b>Fam119a</b>       | 124 | 0  | 2.066766 | 108  | 1.8      | 4.81614  | 26.18251 | Stalled      | chr1:64653053-64665742    | 10.69   |
| <b>Fcamr</b>         | 124 | 0  | 2.066766 | 24   | 0.4      | 0.352945 | 0.697068 | Unclassified | chr1:132695478-132711317  | 13.84   |
| <b>Zranb2</b>        | 124 | 0  | 2.066766 | 175  | 2.916667 | 14.4     | 20.66147 | Stalled      | chr3:157195360-157211303  | 13.944  |
| <b>Gmfb</b>          | 124 | 0  | 2.066766 | 241  | 4.016667 | 9.10695  | 12.47167 | Stalled      | chr14:47427823-47443917   | 14.095  |
| <b>Rchy1</b>         | 124 | 0  | 2.066766 | 196  | 3.266667 | 12.2746  | 26.37405 | Stalled      | chr5:92377929-92394094    | 14.166  |
| <b>Dsccl</b>         | 124 | 0  | 2.066766 | 105  | 1.75     | 4.66919  | 32.6623  | Stalled      | chr15:54907655-54924033   | 14.379  |
| <b>Napsa</b>         | 124 | 0  | 2.066766 | 572  | 9.533333 | 143.107  | 5.540672 | Stalled      | chr7:51825814-51842216    | 14.403  |
| <b>Socs4</b>         | 124 | 0  | 2.066766 | 187  | 3.116667 | 3.11731  | 26.30282 | Stalled      | chr14:47894817-47911266   | 14.45   |
| <b>Unc45a</b>        | 124 | 0  | 2.066766 | 230  | 3.833333 | 21.4205  | 8.507148 | Stalled      | chr7:87470179-87487105    | 14.927  |
| <b>Pomp</b>          | 124 | 0  | 2.066766 | 448  | 7.466667 | 117.368  | 11.39137 | Stalled      | chr5:148670203-148687354  | 15.152  |
| <b>Atp6v1b1</b>      | 124 | 0  | 2.066766 | 55   | 0.916667 | 0.199528 | 0.211978 | Unclassified | chr6:83691010-83708804    | 15.795  |
| <b>Rcn2</b>          | 124 | 0  | 2.066766 | 116  | 1.933333 | 6.25648  | 19.77193 | Stalled      | chr9:55887651-55906890    | 17.24   |
| <b>Dad1</b>          | 124 | 0  | 2.066766 | 432  | 7.2      | 64.9549  | 8.966652 | Stalled      | chr14:54855159-54875604   | 18.446  |
| <b>Shc2</b>          | 124 | 0  | 2.066766 | 33   | 0.55     | 0.042106 | 1.460659 | Unclassified | chr10:79080682-79102663   | 19.982  |
| <b>Ccdc58</b>        | 124 | 0  | 2.066766 | 238  | 3.966667 | 22.5663  | 39.22838 | Stalled      | chr16:36069745-36092204   | 20.46   |
| <b>Arhgef16</b>      | 124 | 0  | 2.066766 | 20   | 0.333333 | 0.070756 | 4.54753  | Unclassified | chr4:153652578-153676004  | 21.427  |
| <b>Pfkl</b>          | 124 | 0  | 2.066766 | 493  | 8.216667 | 43.7607  | 13.66493 | Stalled      | chr10:77449693-77474541   | 22.849  |
| <b>Tiprl</b>         | 124 | 0  | 2.066766 | 129  | 2.15     | 6.34414  | 32.71817 | Stalled      | chr1:167142416-167169089  | 24.674  |
| <b>Abcc10</b>        | 124 | 0  | 2.066766 | 93   | 1.55     | 3.08395  | 72.32523 | Stalled      | chr17:46440178-46466972   | 24.795  |
| <b>Tmem9</b>         | 124 | 0  | 2.066766 | 240  | 4        | 12.3348  | 0.971062 | Stalled      | chr1:137902795-137931606  | 26.812  |
| <b>Nup88</b>         | 124 | 0  | 2.066766 | 413  | 6.883333 | 28.8642  | 16.63692 | Stalled      | chr11:70756572-70785464   | 26.893  |
| <b>Fam162a</b>       | 124 | 0  | 2.066766 | 332  | 5.533333 | 65.3442  | 31.15926 | Stalled      | chr16:36043929-36073601   | 27.673  |
| <b>Srp68</b>         | 124 | 0  | 2.066766 | 840  | 14       | 33.933   | 10.79393 | Stalled      | chr11:116106479-116137531 | 29.053  |
| <b>Ccnt2</b>         | 124 | 0  | 2.066766 | 373  | 6.216667 | 9.63078  | 23.21382 | Stalled      | chr1:129668740-129701414  | 30.675  |
| <b>Crkl</b>          | 124 | 0  | 2.066766 | 333  | 5.55     | 13.8684  | 34.15382 | Stalled      | chr16:17450079-17486348   | 34.27   |
| <b>Wdhd1</b>         | 124 | 0  | 2.066766 | 444  | 7.4      | 12.3972  | 29.74499 | Stalled      | chr14:47860618-47898532   | 35.915  |
| <b>Rrm2b</b>         | 124 | 0  | 2.066766 | 102  | 1.7      | 1.85809  | 81.04211 | Stalled      | chr15:37853707-37892810   | 37.104  |
| <b>Pla2g6</b>        | 124 | 0  | 2.066766 | 364  | 6.066667 | 3.76563  | 20.32227 | Stalled      | chr15:79116657-79160598   | 41.942  |
| <b>Tnip3</b>         | 124 | 0  | 2.066766 | 97   | 1.616667 | 0.99964  | 3.359142 | Unclassified | chr6:65538391-65584034    | 43.644  |
| <b>Ero1b</b>         | 124 | 0  | 2.066766 | 390  | 6.5      | 16.4265  | 30.45883 | Stalled      | chr13:12656149-12701795   | 43.647  |
| <b>Ikkb1</b>         | 124 | 0  | 2.066766 | 970  | 16.16667 | 20.911   | 8.487478 | Stalled      | chr8:23769677-23819055    | 47.379  |
| <b>Acss1</b>         | 124 | 0  | 2.066766 | 162  | 2.7      | 6.8138   | 11.8679  | Stalled      | chr2:150443846-150495976  | 50.131  |
| <b>Nck1</b>          | 124 | 0  | 2.066766 | 241  | 4.016667 | 6.37916  | 57.43774 | Stalled      | chr9:100395421-100448472  | 51.052  |
| <b>Lrp4</b>          | 124 | 0  | 2.066766 | 83   | 1.383333 | 0.257733 | 2.000817 | Unclassified | chr2:91295687-91354057    | 56.371  |
| <b>Cab39</b>         | 124 | 0  | 2.066766 | 750  | 12.5     | 17.1255  | 12.88268 | Stalled      | chr1:87688021-87748152    | 58.132  |
| <b>Snx14</b>         | 124 | 0  | 2.066766 | 195  | 3.25     | 5.41072  | 71.19032 | Stalled      | chr9:88271584-88335789    | 62.206  |
| <b>Edem3</b>         | 124 | 0  | 2.066766 | 297  | 4.95     | 6.50962  | 40.88677 | Stalled      | chr1:153600503-153669458  | 66.956  |
| <b>Banp</b>          | 124 | 49 | 2.066766 | 955  | 15.91667 | 3.15814  | 22.72968 | Stalled      | chr8:124472432-124553158  | 78.727  |
| <b>Gcom1</b>         | 124 | 0  | 2.066766 | 249  | 4.15     | 3.244    | 14.24289 | Stalled      | chr9:71352153-71442167    | 88.015  |
| <b>Adarb1</b>        | 124 | 0  | 2.066766 | 233  | 3.883333 | 0.275587 | 12.31874 | Stalled      | chr10:76753471-76883018   | 127.548 |
| <b>Ccny</b>          | 124 | 0  | 2.066766 | 576  | 9.6      | 9.62421  | 39.70926 | Stalled      | chr18:9314041-9452148     | 136.108 |
| <b>Tmem147</b>       | 123 | 0  | 2.050098 | 17   | 0.283333 | 28.6263  | 9.035884 | Unclassified | chr7:31512719-31516553    | 1.835   |
| <b>Setd6</b>         | 123 | 0  | 2.050098 | 127  | 2.116667 | 12.4338  | 4.409968 | Stalled      | chr8:98237812-98242904    | 3.093   |
| <b>Mclr</b>          | 123 | 0  | 2.050098 | 5    | 0.083333 | 0.199272 | 3.826399 | Unclassified | chr8:125928981-125934647  | 3.667   |
| <b>Nubp2</b>         | 123 | 0  | 2.050098 | 119  | 1.983333 | 33.2806  | 6.326718 | Stalled      | chr17:25019555-25025295   | 3.741   |
| <b>Suox</b>          | 123 | 0  | 2.050098 | 21   | 0.35     | 2.5642   | 4.669455 | Stalled      | chr10:128106942-128112974 | 4.033   |
| <b>Fit3l</b>         | 123 | 0  | 2.050098 | 47   | 0.783333 | 7.54375  | 6.461313 | Stalled      | chr7:52386558-52393802    | 5.245   |
| <b>Gm16517</b>       | 123 | 0  | 2.050098 | 100  | 1.666667 | 25.4655  | 6.057776 | Stalled      | chr10:79130154-79138871   | 6.718   |
| <b>Bud31</b>         | 123 | 0  | 2.050098 | 222  | 3.7      | 43.2193  | 7.360134 | Stalled      | chr5:145899265-145908943  | 7.679   |
| <b>Bsnd</b>          | 123 | 0  | 2.050098 | 24   | 0.4      | 0.448619 | 4.654513 | Stalled      | chr4:106156062-106166848  | 8.787   |
| <b>Eny2</b>          | 123 | 0  | 2.050098 | 56   | 0.933333 | 6.44525  | 44.7552  | Stalled      | chr15:44257656-44269231   | 9.576   |
| <b>D17H6S56E-3</b>   | 123 | 0  | 2.050098 | 211  | 3.516667 | 0.406825 | 13.61089 | Stalled      | chr17:35151523-35163686   | 10.164  |
| <b>Rasd2</b>         | 123 | 0  | 2.050098 | 22   | 0.366667 | 0.036488 | 0.588432 | Unclassified | chr8:77735842-77748012    | 10.171  |
| <b>Letmd1</b>        | 123 | 0  | 2.050098 | 107  | 1.783333 | 7.97425  | 22.53037 | Stalled      | chr15:100297464-100309683 | 10.22   |
| <b>Cox4i2</b>        | 123 | 0  | 2.050098 | 30   | 0.5      | 3.0322   | 0.989916 | Unclassified | chr2:152577908-152590773  | 10.866  |
| <b>Cct5</b>          | 123 | 0  | 2.050098 | 510  | 8.5      | 133.794  | 9.579983 | Stalled      | chr15:31520638-31533559   | 10.922  |
| <b>Eef1g</b>         | 123 | 0  | 2.050098 | 736  | 12.26667 | 214.755  | 4.94722  | Stalled      | chr19:9039530-9052670     | 11.141  |
| <b>Cobra1</b>        | 123 | 0  | 2.050098 | 231  | 3.85     | 31.8044  | 10.69969 | Stalled      | chr2:25055231-25069009    | 11.779  |
| <b>Ndrg4</b>         | 123 | 0  | 2.050098 | 65   | 1.083333 | 0.524132 | 1.57909  | Unclassified | chr8:98224962-98238856    | 11.895  |
| <b>Mars</b>          | 123 | 0  | 2.050098 | 622  | 10.36667 | 38.8587  | 8.489278 | Stalled      | chr10:126733277-126750842 | 15.566  |
| <b>Lepre1</b>        | 123 | 0  | 2.050098 | 85   | 1.416667 | 5.13709  | 25.59242 | Stalled      | chr4:118903519-118921582  | 16.064  |
| <b>Fam78a</b>        | 123 | 0  | 2.050098 | 322  | 5.366667 | 14.6477  | 4.964543 | Stalled      | chr2:31922404-31941225    | 16.822  |
| <b>Fam83d</b>        | 123 | 0  | 2.050098 | 412  | 6.866667 | 7.35379  | 15.63957 | Stalled      | chr2:158591834-158612373  | 18.54   |
| <b>Wibg</b>          | 123 | 0  | 2.050098 | 338  | 5.633333 | 33.5261  | 14.07179 | Stalled      | chr10:128182934-128203619 | 18.686  |
| <b>C3</b>            | 123 | 0  | 2.050098 | 73   | 1.216667 | 0.629067 | 0.722664 | Unclassified | chr17:57343395-57369559   | 24.165  |
| <b>Gch1</b>          | 123 | 0  | 2.050098 | 473  | 7.883333 | 8.12741  | 14.55132 | Stalled      | chr14:47773569-47811077   | 35.509  |
| <b>Cyb5b</b>         | 123 | 0  | 2.050098 | 1171 | 19.51667 | 42.2054  | 9.762771 | Stalled      | chr8:109672560-109711370  | 36.811  |
| <b>Cryz1l</b>        | 123 | 0  | 2.050098 | 262  | 4.366667 | 4.37502  | 9.277041 | Stalled      | chr16:91689702-91730844   | 39.143  |
| <b>Kdsr</b>          | 123 | 0  | 2.050098 | 209  | 3.483333 | 1.55522  | 30.84277 | Stalled      | chr1:108616986-108658319  | 39.334  |
| <b>Pik3r6</b>        | 123 | 0  | 2.050098 | 212  | 3.533333 | 2.58656  | 7.469819 | Stalled      | chr11:68314520-68366200   | 49.681  |
| <b>Tmem110</b>       | 123 | 0  | 2.050098 | 743  | 12.38333 | 6.63185  | 11.16152 | Stalled      | chr14:31636779-31690395   | 51.617  |
| <b>Nudcd1</b>        | 123 | 0  | 2.050098 | 188  | 3.133333 | 10.474   | 64.86333 | Stalled      | chr15:44206772-44261853   | 53.082  |
| <b>Pspcl</b>         | 123 | 0  | 2.050098 | 489  | 8.15     | 25.3311  | 33.99873 | Stalled      | chr14:57341285-57399153   | 55.869  |
| <b>Tbc1d22b</b>      | 123 | 0  | 2.050098 | 627  | 10.45    | 8.21136  | 6.396153 | Stalled      | chr17:29684746-29743753   | 57.008  |
| <b>Rassf3</b>        | 123 | 0  | 2.050098 | 543  | 9.05     | 10.9279  | 19.96458 | Stalled      | chr10:120847406-120915306 | 65.901  |
| <b>3110009E18Rik</b> | 123 | 0  | 2.050098 | 253  | 4.216667 | 1.99599  | 71.78965 | Stalled      | chr1:122015771-122084766  | 66.996  |

|                      |     |    |          |      |          |          |          |              |                           |         |
|----------------------|-----|----|----------|------|----------|----------|----------|--------------|---------------------------|---------|
| <b>Mrps27</b>        | 123 | 0  | 2.050098 | 851  | 14.18333 | 18.8211  | 27.43256 | Stalled      | chr13:100112740-100185516 | 70.777  |
| <b>Mll1</b>          | 123 | 0  | 2.050098 | 970  | 16.16667 | 9.27754  | 9.551561 | Stalled      | chr9:44611437-44691357    | 77.921  |
| <b>Dnm2</b>          | 123 | 0  | 2.050098 | 1299 | 21.65    | 35.2096  | 13.58721 | Stalled      | chr9:21227388-21311568    | 82.181  |
| <b>Erp44</b>         | 123 | 0  | 2.050098 | 848  | 14.13333 | 30.0395  | 24.02694 | Stalled      | chr4:48206202-48294461    | 86.26   |
| <b>Ccdc18</b>        | 123 | 0  | 2.050098 | 126  | 2.1      | 0.976827 | 119.265  | Stalled      | chr5:108559932-108661968  | 100.037 |
| <b>Invs</b>          | 123 | 0  | 2.050098 | 525  | 8.75     | 2.16591  | 58.56971 | Stalled      | chr4:48290673-48444825    | 152.153 |
| <b>2610021K21Rik</b> | 123 | 0  | 2.050098 | 428  | 7.133333 | 2.40913  | 32.26427 | Stalled      | chr12:100955740-101123652 | 165.913 |
| <b>Hipk2</b>         | 123 | 0  | 2.050098 | 2074 | 34.56667 | 7.80969  | 9.846972 | Stalled      | chr6:38647838-38828189    | 178.352 |
| <b>Hist1h3h</b>      | 122 | 0  | 2.033431 | 0    | 0        | 0        | 258      | Unclassified | chr13:21807496-21809984   | 0.489   |
| <b>Nt5c</b>          | 122 | 0  | 2.033431 | 21   | 0.35     | 73.0982  | 5.196353 | Unclassified | chr11:115351739-115355128 | 1.39    |
| <b>Ffar3</b>         | 122 | 0  | 2.033431 | 1    | 0.016667 | 0.141965 | 5.513514 | Unclassified | chr7:31639348-31643197    | 1.85    |
| <b>Uqcrc</b>         | 122 | 0  | 2.033431 | 43   | 0.716667 | 197.298  | 5.102085 | Unclassified | chr11:53242449-53246333   | 1.885   |
| <b>H2-Ke6</b>        | 122 | 0  | 2.033431 | 44   | 0.733333 | 27.7942  | 7.346127 | Stalled      | chr17:34162977-34167000   | 2.024   |
| <b>Rpl37a</b>        | 122 | 0  | 2.033431 | 60   | 1        | 130.026  | 8.275535 | Stalled      | chr1:72755833-72760385    | 2.553   |
| <b>Trpt1</b>         | 122 | 0  | 2.033431 | 285  | 4.75     | 2.14904  | 0.367476 | Stalled      | chr19:7068620-7073536     | 2.917   |
| <b>Ube2c</b>         | 122 | 0  | 2.033431 | 97   | 1.616667 | 53.0197  | 5.467542 | Stalled      | chr2:164593428-164598402  | 2.975   |
| <b>Atp5e</b>         | 122 | 0  | 2.033431 | 81   | 1.35     | 271.597  | 8.793178 | Stalled      | chr2:174286575-174291602  | 3.028   |
| <b>Hax1</b>          | 122 | 0  | 2.033431 | 11   | 0.183333 | 35.0627  | 42.15479 | Stalled      | chr3:89799378-89804608    | 3.231   |
| <b>Exosc4</b>        | 122 | 0  | 2.033431 | 62   | 1.033333 | 15.6678  | 7.397511 | Stalled      | chr15:76155826-76161100   | 3.275   |
| <b>Krtcap2</b>       | 122 | 0  | 2.033431 | 80   | 1.333333 | 106.04   | 5.083951 | Stalled      | chr3:89048359-89053644    | 3.286   |
| <b>Naprt1</b>        | 122 | 0  | 2.033431 | 34   | 0.566667 | 3.46589  | 8.346313 | Stalled      | chr15:75721393-75726911   | 3.519   |
| <b>Ddn</b>           | 122 | 0  | 2.033431 | 16   | 0.266667 | 0.664709 | 0.657091 | Unclassified | chr15:98634212-98640356   | 4.145   |
| <b>Abhd14b</b>       | 122 | 0  | 2.033431 | 23   | 0.383333 | 3.11888  | 4.368341 | Stalled      | chr9:106348970-106355249  | 4.28    |
| <b>Cdk5</b>          | 122 | 0  | 2.033431 | 15   | 0.25     | 5.9212   | 18.23639 | Stalled      | chr5:23924059-23931348    | 5.29    |
| <b>Testk1</b>        | 122 | 0  | 2.033431 | 185  | 3.083333 | 6.63756  | 1.694071 | Elongating   | chr4:43453148-43460946    | 5.799   |
| <b>Tmem138</b>       | 122 | 0  | 2.033431 | 41   | 0.683333 | 4.66186  | 37.23157 | Stalled      | chr19:10645374-10653587   | 6.214   |
| <b>Zfp213</b>        | 122 | 0  | 2.033431 | 113  | 1.883333 | 5.12203  | 22.54667 | Stalled      | chr17:23693735-23703193   | 7.459   |
| <b>Prss16</b>        | 122 | 0  | 2.033431 | 36   | 0.6      | 1.65481  | 0        | Unclassified | chr13:22094044-22103610   | 7.567   |
| <b>mmu-mir-219-1</b> | 122 | 0  | 2.033431 | 861  | 14.35    | ND       | ND       | Stalled      | chr17:34159647-34167321   | 7.675   |
| <b>Fam131a</b>       | 122 | 0  | 2.033431 | 59   | 0.983333 | 0.998802 | 0.740622 | Unclassified | chr16:20693129-20703109   | 7.981   |
| <b>Grb7</b>          | 122 | 0  | 2.033431 | 96   | 1.6      | 0.807073 | 0.218493 | Stalled      | chr11:98306147-98316687   | 8.541   |
| <b>Eif2b1</b>        | 122 | 0  | 2.033431 | 277  | 4.616667 | 13.3439  | 10.7411  | Stalled      | chr5:125020222-125031066  | 8.845   |
| <b>Qpctl</b>         | 122 | 0  | 2.033431 | 126  | 2.1      | 9.94028  | 7.267314 | Stalled      | chr7:19725655-19736545    | 8.981   |
| <b>Ddx56</b>         | 122 | 0  | 2.033431 | 501  | 8.35     | 15.208   | 6.355835 | Stalled      | chr11:6157547-6169732     | 10.186  |
| <b>Ubiad1</b>        | 122 | 0  | 2.033431 | 115  | 1.916667 | 9.40991  | 13.03599 | Stalled      | chr4:147808605-147820860  | 10.256  |
| <b>Rsl1d1</b>        | 122 | 0  | 2.033431 | 357  | 5.95     | 37.161   | 10.00874 | Stalled      | chr16:11193129-11205385   | 10.257  |
| <b>Tmem132a</b>      | 122 | 0  | 2.033431 | 645  | 10.75    | 4.98653  | 1.252226 | Elongating   | chr19:10932318-10946269   | 11.952  |
| <b>Klf15</b>         | 122 | 0  | 2.033431 | 18   | 0.3      | 0.044695 | 0.391584 | Unclassified | chr6:90410619-90425203    | 12.585  |
| <b>Arrdc3</b>        | 122 | 80 | 2.033431 | 698  | 11.63333 | 2.10279  | 3.947034 | Stalled      | chr13:81020682-81035303   | 12.622  |
| <b>Snrnp70</b>       | 122 | 0  | 2.033431 | 1250 | 20.83333 | 229.731  | 6.413182 | Stalled      | chr7:52631823-52653017    | 19.195  |
| <b>Anp32b</b>        | 122 | 0  | 2.033431 | 1661 | 27.68333 | 200.227  | 4.078182 | Stalled      | chr4:46461988-46485395    | 21.408  |
| <b>Tmem59</b>        | 122 | 0  | 2.033431 | 166  | 2.766667 | 20.6834  | 33.52585 | Stalled      | chr4:106849234-106873599  | 22.366  |
| <b>Rarg</b>          | 122 | 0  | 2.033431 | 71   | 1.183333 | 0.715613 | 0.931223 | Unclassified | chr15:102065370-102089914 | 22.545  |
| <b>Ndufv2</b>        | 122 | 0  | 2.033431 | 203  | 3.383333 | 30.1984  | 29.74207 | Stalled      | chr17:66428134-66452831   | 22.698  |
| <b>Derl1</b>         | 122 | 0  | 2.033431 | 662  | 11.03333 | 28.0515  | 8.909261 | Stalled      | chr15:57701056-57725973   | 22.918  |
| <b>Ddb1</b>          | 122 | 0  | 2.033431 | 531  | 8.85     | 60.3629  | 19.63172 | Stalled      | chr19:10678114-10704311   | 24.198  |
| <b>Slc37a2</b>       | 122 | 0  | 2.033431 | 241  | 4.016667 | 4.26934  | 10.94326 | Stalled      | chr9:37036733-37065323    | 26.591  |
| <b>Sult2b1</b>       | 122 | 0  | 2.033431 | 567  | 9.45     | 2.49489  | 0.239878 | Stalled      | chr7:52985353-53016925    | 29.573  |
| <b>Hs1bp3</b>        | 122 | 0  | 2.033431 | 142  | 2.366667 | 0.929112 | 5.487832 | Stalled      | chr12:8318238-8350630     | 30.393  |
| <b>Ece2</b>          | 122 | 0  | 2.033431 | 360  | 6        | 14.9548  | 13.63757 | Stalled      | chr16:20609673-20645988   | 34.316  |
| <b>Etnk1</b>         | 122 | 59 | 2.033431 | 966  | 16.1     | 21.9013  | 17.34726 | Stalled      | chr6:143113749-143157064  | 41.316  |
| <b>Mlh1</b>          | 122 | 0  | 2.033431 | 353  | 5.883333 | 7.65529  | 61.31413 | Stalled      | chr9:111130731-111176112  | 43.382  |
| <b>Sic22a4</b>       | 122 | 0  | 2.033431 | 54   | 0.9      | 0.714756 | 3.141518 | Unclassified | chr11:53796627-53843592   | 44.966  |
| <b>Acly</b>          | 122 | 0  | 2.033431 | 904  | 15.06667 | 67.8567  | 18.21615 | Stalled      | chr11:100337669-100391215 | 51.547  |
| <b>Btbd16</b>        | 122 | 0  | 2.033431 | 92   | 1.533333 | 0.112031 | 2.491143 | Unclassified | chr7:137915582-137969411  | 51.83   |
| <b>Cnot10</b>        | 122 | 0  | 2.033431 | 545  | 9.083333 | 17.3642  | 15.2071  | Stalled      | chr9:114494995-114551192  | 54.198  |
| <b>Tptn5</b>         | 122 | 0  | 2.033431 | 221  | 3.683333 | 0.365893 | 0.198939 | Unclassified | chr7:54333171-54391054    | 55.884  |
| <b>Tpp2</b>          | 122 | 0  | 2.033431 | 725  | 12.08333 | 8.16975  | 37.97002 | Stalled      | chr1:43988851-44059816    | 68.966  |
| <b>Sic38a1</b>       | 122 | 0  | 2.033431 | 2305 | 38.41667 | 21.177   | 8.522725 | Stalled      | chr15:96401849-96474393   | 70.545  |
| <b>Ccdc93</b>        | 122 | 0  | 2.033431 | 515  | 8.583333 | 2.73743  | 17.67117 | Stalled      | chr1:123325643-123403037  | 75.395  |
| <b>Uxs1</b>          | 122 | 0  | 2.033431 | 548  | 9.133333 | 5.15114  | 33.18896 | Stalled      | chr1:43807075-43886553    | 77.479  |
| <b>Serpini1</b>      | 122 | 0  | 2.033431 | 185  | 3.083333 | 2.36002  | 76.81281 | Stalled      | chr3:75359454-75446445    | 84.992  |
| <b>Sic22a3</b>       | 122 | 0  | 2.033431 | 134  | 2.233333 | 0.05128  | 0.392929 | Unclassified | chr17:12612839-12702570   | 87.732  |
| <b>Myof</b>          | 122 | 0  | 2.033431 | 705  | 11.75    | 1.52646  | 1.860805 | Stalled      | chr19:37973525-38120067   | 144.543 |
| <b>Fmn2</b>          | 122 | 0  | 2.033431 | 245  | 4.083333 | 1.76821  | 7.361894 | Unclassified | chr1:176429955-176752860  | 320.906 |
| <b>Hist1h4i</b>      | 121 | 27 | 2.016763 | 0    | 0        | 0        | 432      | Unclassified | chr13:22132684-22135221   | 0.538   |
| <b>Sox15</b>         | 121 | 0  | 2.016763 | 14   | 0.233333 | 0.184143 | 2.052632 | Unclassified | chr11:69466874-69470123   | 1.25    |
| <b>4930426L09Rik</b> | 121 | 0  | 2.016763 | 2    | 0.033333 | 7.01398  | 52.00161 | Unclassified | chr2:18917945-18921430    | 1.486   |
| <b>Dom3z</b>         | 121 | 0  | 2.016763 | 64   | 1.066667 | 16.3919  | 4.269238 | Stalled      | chr17:34971963-34976131   | 2.169   |
| <b>Ndufa3</b>        | 121 | 0  | 2.016763 | 63   | 1.05     | 111.35   | 3.702115 | Stalled      | chr7:3566974-3571763      | 2.79    |
| <b>Dnase2a</b>       | 121 | 0  | 2.016763 | 29   | 0.483333 | 9.88275  | 8.706313 | Stalled      | chr8:87430522-87435360    | 2.839   |
| <b>Zfp296</b>        | 121 | 0  | 2.016763 | 137  | 2.283333 | 15.9404  | 3.792295 | Stalled      | chr7:20161164-20166004    | 2.841   |
| <b>Dctpp1</b>        | 121 | 0  | 2.016763 | 43   | 0.716667 | 63.95    | 8.469184 | Stalled      | chr7:134400475-134406181  | 3.707   |
| <b>Galt</b>          | 121 | 0  | 2.016763 | 28   | 0.466667 | 9.22822  | 8.284835 | Stalled      | chr4:41700125-41705998    | 3.874   |
| <b>Ppox</b>          | 121 | 0  | 2.016763 | 57   | 0.95     | 15.2699  | 4.619111 | Stalled      | chr1:173207122-173213317  | 4.196   |
| <b>Aif1</b>          | 121 | 0  | 2.016763 | 112  | 1.866667 | 0.907721 | 0.24202  | Stalled      | chr17:35307936-35314946   | 5.011   |
| <b>1100001G20Rik</b> | 121 | 0  | 2.016763 | 7    | 0.116667 | 0.526698 | 5.629655 | Unclassified | chr11:83558441-83566148   | 5.708   |
| <b>Gm505</b>         | 121 | 0  | 2.016763 | 198  | 3.3      | 14.6785  | 10.90589 | Stalled      | chr8:127419785-127427713  | 5.929   |
| <b>Crygn</b>         | 121 | 0  | 2.016763 | 160  | 2.666667 | 2.59184  | 0.035226 | Stalled      | chr5:24256820-24265661    | 6.842   |
| <b>Trim28</b>        | 121 | 0  | 2.016763 | 420  | 7        | 64.8482  | 5.289742 | Stalled      | chr7:13607500-13616381    | 6.882   |
| <b>BC024139</b>      | 121 | 0  | 2.016763 | 18   | 0.3      | 0        | 0.251186 | Unclassified | chr15:75949949-75958986   | 7.038   |
| <b>0610007P14Rik</b> | 121 | 0  | 2.016763 | 175  | 2.916667 | 32.0498  | 12.02141 | Stalled      | chr12:87156404-87167495   | 9.092   |
| <b>Mmp14</b>         | 121 | 0  | 2.016763 | 54   | 0.9      | 1.28805  | 3.315628 | Stalled      | chr14:55048440-55060095   | 9.656   |
| <b>Plin3</b>         | 121 | 0  | 2.016763 | 102  | 1.7      | 17.3493  | 6.187115 | Stalled      | chr17:56418384-56431934   | 11.551  |
| <b>Cant1</b>         | 121 | 0  | 2.016763 | 285  | 4.75     | 11.7866  | 13.32044 | Stalled      | chr11:118267602-118282366 | 12.765  |
| <b>4833439L19Rik</b> | 121 | 0  | 2.016763 | 191  | 3.183333 | 6.53779  | 9.672324 | Stalled      | chr13:54652579-54668743   | 14.165  |



|                       |     |    |          |      |          |          |          |              |                           |         |
|-----------------------|-----|----|----------|------|----------|----------|----------|--------------|---------------------------|---------|
| <b>Asf1b</b>          | 121 | 0  | 2.016763 | 185  | 3.083333 | 31.502   | 10.67979 | Stalled      | chr8:86477592-86494094    | 14.503  |
| <b>Zfp35</b>          | 121 | 0  | 2.016763 | 247  | 4.116667 | 3.79356  | 9.066203 | Stalled      | chr18:24146134-24163872   | 15.739  |
| <b>Dctn5</b>          | 121 | 0  | 2.016763 | 180  | 3        | 24.9536  | 28.77808 | Stalled      | chr7:129274554-129292558  | 16.005  |
| <b>Ccr9</b>           | 121 | 0  | 2.016763 | 63   | 1.05     | 0.163629 | 0.389735 | Unclassified | chr9:123674328-123692575  | 16.248  |
| <b>Rnf4</b>           | 121 | 0  | 2.016763 | 473  | 7.883333 | 19.97999 | 16.43426 | Stalled      | chr5:34677038-34696079    | 17.042  |
| <b>Gtf3c4</b>         | 121 | 0  | 2.016763 | 248  | 4.133333 | 5.57045  | 22.52698 | Stalled      | chr2:28677821-28697880    | 18.06   |
| <b>C130022K22Rik</b>  | 121 | 0  | 2.016763 | 167  | 2.783333 | 9.77144  | 22.81284 | Stalled      | chr6:91826046-91849842    | 21.797  |
| <b>Alox5ap</b>        | 121 | 0  | 2.016763 | 96   | 1.6      | 2.17607  | 2.422922 | Unclassified | chr5:150074633-150099623  | 22.991  |
| <b>Palb2</b>          | 121 | 0  | 2.016763 | 191  | 3.183333 | 3.08817  | 43.25874 | Stalled      | chr7:129250778-129278460  | 25.683  |
| <b>Chaf1a</b>         | 121 | 0  | 2.016763 | 861  | 14.35    | 34.8227  | 5.066885 | Stalled      | chr17:56177838-56207449   | 27.612  |
| <b>Map3k7ip1</b>      | 121 | 0  | 2.016763 | 534  | 8.9      | 7.45203  | 12.36328 | Stalled      | chr15:79961583-79992132   | 28.55   |
| <b>Ssu72</b>          | 121 | 0  | 2.016763 | 747  | 12.45    | 48.8081  | 13.75739 | Stalled      | chr4:155076923-155107982  | 29.06   |
| <b>Hic2</b>           | 121 | 0  | 2.016763 | 243  | 4.05     | 1.06638  | 14.74905 | Stalled      | chr16:17231679-17263523   | 29.845  |
| <b>EG240055</b>       | 121 | 0  | 2.016763 | 84   | 1.4      | 0.149172 | 3.718213 | Unclassified | chr17:26549909-26583285   | 31.377  |
| <b>Hnrrnpul1</b>      | 121 | 0  | 2.016763 | 1255 | 20.91667 | 92.8896  | 7.678126 | Stalled      | chr7:26507057-26541720    | 32.664  |
| <b>Ncbp1</b>          | 121 | 0  | 2.016763 | 488  | 8.133333 | 20.1013  | 23.93284 | Stalled      | chr4:46149382-46185274    | 33.893  |
| <b>Zcwpw1</b>         | 121 | 0  | 2.016763 | 45   | 0.75     | 2.75876  | 41.62065 | Stalled      | chr5:138227029-138263848  | 34.82   |
| <b>Cass4</b>          | 121 | 0  | 2.016763 | 248  | 4.133333 | 0.965992 | 5.988296 | Stalled      | chr2:172217293-172258360  | 39.068  |
| <b>Gpr160</b>         | 121 | 0  | 2.016763 | 179  | 2.983333 | 2.31164  | 3.487603 | Stalled      | chr3:30752871-30796114    | 41.244  |
| <b>Ppl</b>            | 121 | 0  | 2.016763 | 218  | 3.633333 | 0.451122 | 1.030244 | Unclassified | chr16:5086383-5134574     | 46.192  |
| <b>Ddx31</b>          | 121 | 0  | 2.016763 | 840  | 14       | 6.68645  | 25.19476 | Stalled      | chr2:28693925-28761094    | 65.17   |
| <b>Ern1</b>           | 121 | 0  | 2.016763 | 571  | 9.516667 | 5.67224  | 27.69176 | Stalled      | chr11:106258933-106351110 | 90.178  |
| <b>Pcnt</b>           | 121 | 0  | 2.016763 | 1511 | 25.18333 | 8.40816  | 22.18868 | Stalled      | chr10:75813998-75907657   | 91.66   |
| <b>Gpd2</b>           | 121 | 0  | 2.016763 | 608  | 10.13333 | 3.59939  | 66.43879 | Stalled      | chr2:57088792-57223130    | 132.339 |
| <b>Pip4k2a</b>        | 121 | 0  | 2.016763 | 847  | 14.11667 | 8.66771  | 41.58159 | Stalled      | chr2:18763882-18921748    | 155.867 |
| <b>Vps13a</b>         | 121 | 0  | 2.016763 | 561  | 9.35     | 3.29675  | 44.40596 | Stalled      | chr19:16691163-16857417   | 164.255 |
| <b>Tmtc1</b>          | 121 | 0  | 2.016763 | 238  | 3.966667 | 0        | 0.939687 | Unclassified | chr6:148180951-148394874  | 211.924 |
| <b>Ragef4</b>         | 121 | 0  | 2.016763 | 590  | 9.833333 | 0.146128 | 1.586008 | Unclassified | chr2:71817343-72094433    | 275.091 |
| <b>Tmem223</b>        | 121 | 0  | 2.000096 | 21   | 0.35     | 21.2564  | 7.031051 | Unclassified | chr19:8843485-8846965     | 1.481   |
| <b>Tmem191c</b>       | 120 | 0  | 2.000096 | 38   | 0.633333 | 3.20484  | 1.107261 | Elongating   | chr16:17274392-17278753   | 2.362   |
| <b>Wbp1</b>           | 120 | 0  | 2.000096 | 147  | 2.45     | 16.8256  | 1.462798 | Elongating   | chr6:83069037-83073455    | 2.419   |
| <b>H2-M5</b>          | 120 | 0  | 2.000096 | 19   | 0.316667 | 29.0113  | 1.119268 | Unclassified | chr17:37123799-37128449   | 2.651   |
| <b>Rps13</b>          | 120 | 0  | 2.000096 | 123  | 2.05     | 52.1361  | 6.000241 | Stalled      | chr7:123475020-123479704  | 2.685   |
| <b>Prrt2</b>          | 120 | 0  | 2.000096 | 21   | 0.35     | 0.509565 | 18.27984 | Stalled      | chr7:134161055-134166725  | 3.671   |
| <b>Rpusd3</b>         | 120 | 0  | 2.000096 | 81   | 1.35     | 7.80131  | 5.287115 | Stalled      | chr6:113365313-113371334  | 4.022   |
| <b>Egr2</b>           | 120 | 0  | 2.000096 | 323  | 5.383333 | 8.96811  | 2.025242 | Elongating   | chr10:66998616-67004936   | 4.321   |
| <b>230009A05Rik</b>   | 120 | 0  | 2.000096 | 12   | 0.2      | 18.3839  | 17.89702 | Stalled      | chr9:63242253-63249051    | 4.799   |
| <b>Abhd1</b>          | 120 | 0  | 2.000096 | 290  | 4.833333 | 7.12163  | 1.782227 | Elongating   | chr5:31250438-31257468    | 5.031   |
| <b>Leng1</b>          | 120 | 0  | 2.000096 | 276  | 4.6      | 11.4966  | 3.339555 | Stalled      | chr7:3611708-3619442      | 5.735   |
| <b>Preb</b>           | 120 | 0  | 2.000096 | 421  | 7.016667 | 21.003   | 4.470077 | Stalled      | chr5:31254039-31264734    | 8.696   |
| <b>Hars2</b>          | 120 | 0  | 2.000096 | 45   | 0.75     | 6.29606  | 52.22687 | Stalled      | chr18:36940933-36952214   | 9.282   |
| <b>Dvl2</b>           | 120 | 0  | 2.000096 | 112  | 1.866667 | 11.8142  | 18.38059 | Stalled      | chr11:69812127-69823611   | 9.485   |
| <b>Erh</b>            | 120 | 0  | 2.000096 | 315  | 5.25     | 63.8961  | 9.77248  | Stalled      | chr12:81735009-81746848   | 9.84    |
| <b>Signlecg</b>       | 120 | 0  | 2.000096 | 269  | 4.483333 | 41.9123  | 3.490465 | Stalled      | chr7:50661649-50673719    | 10.071  |
| <b>Zscan10</b>        | 120 | 0  | 2.000096 | 28   | 0.466667 | 0.476153 | 0.986412 | Unclassified | chr17:23735822-23747986   | 10.165  |
| <b>Ap4b1</b>          | 120 | 0  | 2.000096 | 53   | 0.883333 | 9.38829  | 51.73498 | Stalled      | chr3:103611439-103625946  | 12.508  |
| <b>Txndc9</b>         | 120 | 0  | 2.000096 | 351  | 5.85     | 5.07502  | 8.254869 | Stalled      | chr1:38040711-38056053    | 13.343  |
| <b>Cetn3</b>          | 120 | 0  | 2.000096 | 67   | 1.116667 | 24.746   | 69.4364  | Stalled      | chr13:81920290-81936156   | 13.867  |
| <b>Snrpa1</b>         | 120 | 0  | 2.000096 | 286  | 4.766667 | 44.3714  | 13.10799 | Stalled      | chr7:73203221-73219472    | 14.252  |
| <b>Vegfa</b>          | 120 | 0  | 2.000096 | 860  | 14.33333 | 24.5133  | 5.527725 | Stalled      | chr17:46153942-46171326   | 15.385  |
| <b>Rps6k11</b>        | 120 | 0  | 2.000096 | 273  | 4.55     | 1.44595  | 0.764939 | Stalled      | chr12:86476545-86494214   | 15.67   |
| <b>Zfp653</b>         | 120 | 0  | 2.000096 | 257  | 4.283333 | 6.40158  | 10.0748  | Stalled      | chr9:21859903-21877789    | 15.887  |
| <b>Qdpr</b>           | 120 | 0  | 2.000096 | 125  | 2.083333 | 36.0132  | 24.06424 | Stalled      | chr5:45825272-45843468    | 16.197  |
| <b>Rspsh1</b>         | 120 | 0  | 2.000096 | 95   | 1.583333 | 1.50975  | 2.567794 | Unclassified | chr17:31391964-31416301   | 22.338  |
| <b>Ada</b>            | 120 | 0  | 2.000096 | 763  | 12.71667 | 11.2298  | 1.438082 | Elongating   | chr2:163552319-163577913  | 23.595  |
| <b>Scnn1a</b>         | 120 | 0  | 2.000096 | 33   | 0.55     | 0.139206 | 0.812992 | Unclassified | chr6:125269357-125294958  | 23.602  |
| <b>Nub1</b>           | 120 | 0  | 2.000096 | 572  | 9.533333 | 23.9266  | 9.923353 | Stalled      | chr5:24189632-24216373    | 24.742  |
| <b>Tiparp</b>         | 120 | 0  | 2.000096 | 720  | 12       | 4.92663  | 20.72356 | Stalled      | chr3:65330368-65359440    | 27.073  |
| <b>Eng</b>            | 120 | 0  | 2.000096 | 252  | 4.2      | 2.86347  | 2.932408 | Stalled      | chr2:32500114-32538189    | 36.076  |
| <b>Rab11fip5</b>      | 120 | 0  | 2.000096 | 86   | 1.433333 | 0.171683 | 4.032613 | Unclassified | chr6:85284955-85326628    | 39.674  |
| <b>Kif11</b>          | 120 | 0  | 2.000096 | 613  | 10.21667 | 16.0577  | 22.51781 | Stalled      | chr19:37448892-37496349   | 45.458  |
| <b>Orc4l</b>          | 120 | 0  | 2.000096 | 297  | 4.95     | 2.80987  | 40.45414 | Stalled      | chr2:48758371-48806787    | 46.417  |
| <b>Tcfcp2</b>         | 120 | 0  | 2.000096 | 107  | 1.783333 | 1.55151  | 49.96766 | Stalled      | chr15:100333226-100384378 | 49.153  |
| <b>4921517L17Rik</b>  | 120 | 0  | 2.000096 | 267  | 4.45     | 2.47725  | 84.98771 | Stalled      | chr2:156136208-156201374  | 63.167  |
| <b>Dync1h1</b>        | 120 | 0  | 2.000096 | 908  | 15.13333 | 17.4029  | 14.33654 | Stalled      | chr12:111837604-111905154 | 65.551  |
| <b>Spna2</b>          | 120 | 0  | 2.000096 | 1038 | 17.3     | 15.6073  | 20.53447 | Stalled      | chr2:29819079-29886970    | 65.892  |
| <b>Elov15</b>         | 120 | 0  | 2.000096 | 817  | 13.61667 | 12.3401  | 15.50608 | Stalled      | chr9:77763171-77832326    | 67.156  |
| <b>Heatr5a</b>        | 120 | 0  | 2.000096 | 388  | 6.466667 | 2.19408  | 29.56151 | Stalled      | chr12:52976859-53074308   | 95.45   |
| <b>38785</b>          | 120 | 0  | 2.000096 | 241  | 4.016667 | 0.255392 | 0.847817 | Unclassified | chr11:105222112-105320049 | 95.938  |
| <b>Sico5a1</b>        | 120 | 0  | 2.000096 | 159  | 2.65     | 0.54796  | 13.55758 | Stalled      | chr1:12856630-12983216    | 124.587 |
| <b>Rps6ka2</b>        | 120 | 0  | 2.000096 | 302  | 5.033333 | 1.00936  | 32.88289 | Stalled      | chr17:7372463-7507664     | 133.202 |
| <b>Myrip</b>          | 120 | 0  | 2.000096 | 232  | 3.866667 | 0.024222 | 1.267635 | Unclassified | chr9:120211190-120383952  | 170.763 |
| <b>Tbc1d1</b>         | 120 | 0  | 2.000096 | 3910 | 65.16667 | 9.93876  | 13.78255 | Stalled      | chr5:64549449-64742725    | 191.277 |
| <b>Grik3</b>          | 120 | 0  | 2.000096 | 278  | 4.633333 | 0.021016 | 0.888765 | Unclassified | chr4:125166074-125391417  | 223.344 |
| <b>Mbd5</b>           | 120 | 0  | 2.000096 | 820  | 13.66667 | 1.00434  | 95.14994 | Stalled      | chr2:48803027-49172589    | 367.563 |
| <b>BC050777</b>       | 119 | 0  | 1.983428 | 5    | 0.083333 | 0.173291 | 1.209141 | Unclassified | chr2:181225910-181229685  | 1.776   |
| <b>Gm5464</b>         | 119 | 62 | 1.983428 | 22   | 0.366667 | 3.96415  | 17.78693 | Stalled      | chr14:67485686-67489842   | 2.157   |
| <b>Isyna1</b>         | 119 | 0  | 1.983428 | 150  | 2.5      | 51.611   | 3.411782 | Stalled      | chr8:73116379-73121189    | 2.811   |
| <b>Sigmar1</b>        | 119 | 0  | 1.983428 | 48   | 0.8      | 23.4156  | 7.850117 | Stalled      | chr4:41685368-41690186    | 2.819   |
| <b>Hsd3b7</b>         | 119 | 0  | 1.983428 | 52   | 0.866667 | 1.0685   | 5.34625  | Stalled      | chr7:134942122-134947316  | 3.195   |
| <b>Ppp1ca</b>         | 119 | 0  | 1.983428 | 214  | 3.566667 | 208.07   | 2.473033 | Stalled      | chr19:4190173-4195419     | 3.247   |
| <b>ppmu-mir-15a,n</b> | 119 | 0  | 1.983428 | 545  | 9.083333 | ND       | ND       | Stalled      | chr14:62265419-62269754   | 4.336   |
| <b>Scamp3</b>         | 119 | 0  | 1.983428 | 85   | 1.416667 | 26.4256  | 11.13918 | Stalled      | chr3:88979406-88986692    | 5.287   |
| <b>Fcrib</b>          | 119 | 0  | 1.983428 | 47   | 0.783333 | 2.40445  | 0.451906 | Unclassified | chr1:172837403-172845072  | 5.67    |
| <b>Tmco6</b>          | 119 | 0  | 1.983428 | 131  | 2.183333 | 11.7348  | 12.93857 | Stalled      | chr18:36892723-36902045   | 7.323   |
| <b>Rpl5</b>           | 119 | 0  | 1.983428 | 533  | 8.883333 | 113.83   | 4.911226 | Stalled      | chr5:108327608-108337069  | 7.462   |



|                      |     |     |          |     |          |          |          |              |                           |         |
|----------------------|-----|-----|----------|-----|----------|----------|----------|--------------|---------------------------|---------|
| <b>Gm9790</b>        | 119 | 0   | 1.983428 | 83  | 1.383333 | 0        | 33.25819 | Stalled      | chr9:121758657-121768649  | 7.993   |
| <b>Dhrs11</b>        | 119 | 0   | 1.983428 | 234 | 3.9      | 9.62978  | 9.802115 | Stalled      | chr11:84634229-84644505   | 8.277   |
| <b>Rnpep11</b>       | 119 | 0   | 1.983428 | 142 | 2.366667 | 13.7123  | 2.411041 | Elongating   | chr1:94805981-94817415    | 9.435   |
| <b>Higd1a</b>        | 119 | 0   | 1.983428 | 108 | 1.8      | 17.6954  | 35.52481 | Stalled      | chr9:121757677-121769118  | 9.442   |
| <b>Gsk3a</b>         | 119 | 33  | 1.983428 | 313 | 5.216667 | 32.8206  | 2.672314 | Elongating   | chr7:26013277-26024870    | 9.594   |
| <b>Ivbl</b>          | 119 | 0   | 1.983428 | 106 | 1.766667 | 12.0932  | 15.34315 | Stalled      | chr10:78035286-78047238   | 9.953   |
| <b>Gpat2</b>         | 119 | 0   | 1.983428 | 144 | 2.4      | 0.151182 | 0.385783 | Stalled      | chr2:127248934-127261828  | 10.895  |
| <b>Nenf</b>          | 119 | 0   | 1.983428 | 131 | 2.183333 | 17.5294  | 13.29427 | Stalled      | chr1:193130675-193143997  | 11.323  |
| <b>Zfyve21</b>       | 119 | 0   | 1.983428 | 187 | 3.116667 | 7.24942  | 11.47418 | Stalled      | chr12:113050480-113066287 | 13.808  |
| <b>Msh6</b>          | 119 | 0   | 1.983428 | 839 | 13.98333 | 23.8927  | 6.289588 | Stalled      | chr17:88372389-88390223   | 15.835  |
| <b>Atp2a1</b>        | 119 | 0   | 1.983428 | 365 | 6.083333 | 1.06742  | 0.212675 | Stalled      | chr7:133589373-133608587  | 17.215  |
| <b>Cdc7</b>          | 119 | 0   | 1.983428 | 191 | 3.183333 | 7.55846  | 33.92684 | Stalled      | chr5:107391340-107413450  | 20.111  |
| <b>Rapgef3</b>       | 119 | 0   | 1.983428 | 133 | 2.216667 | 2.29861  | 7.438807 | Stalled      | chr15:97575383-97600097   | 22.715  |
| <b>Smpd13b</b>       | 119 | 0   | 1.983428 | 182 | 3.033333 | 1.69738  | 3.166539 | Stalled      | chr4:132288880-132315086  | 24.207  |
| <b>Zfp385a</b>       | 119 | 0   | 1.983428 | 135 | 2.25     | 3.09903  | 2.516265 | Unclassified | chr15:103144325-103172517 | 26.193  |
| <b>C1galt1</b>       | 119 | 0   | 1.983428 | 313 | 5.216667 | 5.59394  | 10.66841 | Stalled      | chr6:7793223-7822041      | 26.819  |
| <b>Tpcn2</b>         | 119 | 0   | 1.983428 | 485 | 8.083333 | 3.83239  | 5.248106 | Stalled      | chr7:152439827-152471832  | 30.006  |
| <b>Bdh1</b>          | 119 | 0   | 1.983428 | 241 | 4.016667 | 11.7237  | 8.95595  | Stalled      | chr16:31426838-31458987   | 30.15   |
| <b>Dlgap5</b>        | 119 | 0   | 1.983428 | 372 | 6.2      | 11.6817  | 9.147736 | Stalled      | chr14:48007454-48040082   | 30.629  |
| <b>Ndc80</b>         | 119 | 0   | 1.983428 | 202 | 3.366667 | 7.73905  | 30.56038 | Stalled      | chr17:71845439-71878197   | 30.759  |
| <b>G3bp2</b>         | 119 | 0   | 1.983428 | 500 | 8.333333 | 23.2859  | 21.38985 | Stalled      | chr5:92481171-92514761    | 31.591  |
| <b>Snx3</b>          | 119 | 0   | 1.983428 | 247 | 4.116667 | 58.8384  | 28.34652 | Stalled      | chr10:42219859-42255175   | 33.317  |
| <b>Gpr89</b>         | 119 | 0   | 1.983428 | 289 | 4.816667 | 10.6216  | 20.73038 | Stalled      | chr3:96674988-96711221    | 34.234  |
| <b>Trdmt1</b>        | 119 | 0   | 1.983428 | 104 | 1.733333 | 2.02339  | 35.0876  | Stalled      | chr2:13431787-13468291    | 34.505  |
| <b>Nek4</b>          | 119 | 0   | 1.983428 | 72  | 1.2      | 3.46105  | 62.04789 | Stalled      | chr14:31762673-31800587   | 35.915  |
| <b>Hsd12</b>         | 119 | 0   | 1.983428 | 125 | 2.083333 | 7.00454  | 51.09674 | Stalled      | chr4:59592462-59631566    | 37.105  |
| <b>Xpo4</b>          | 119 | 0   | 1.983428 | 946 | 15.76667 | 4.27101  | 26.78687 | Stalled      | chr14:58201107-58285793   | 82.687  |
| <b>Tinf2</b>         | 118 | 0   | 1.966761 | 35  | 0.583333 | 16.223   | 8.506098 | Stalled      | chr14:56297919-56302654   | 2.736   |
| <b>Rpl35a</b>        | 118 | 0   | 1.966761 | 303 | 5.05     | 0        | 3.267531 | Stalled      | chr16:33054538-33060274   | 3.737   |
| <b>Gats13</b>        | 118 | 0   | 1.966761 | 41  | 0.683333 | 2.63229  | 3.220109 | Stalled      | chr11:4116253-4122412     | 4.16    |
| <b>Dnajc4</b>        | 118 | 0   | 1.966761 | 39  | 0.65     | 6.34628  | 8.81177  | Stalled      | chr19:7062400-7068762     | 4.363   |
| <b>Ebi3</b>          | 118 | 0   | 1.966761 | 160 | 2.666667 | 56.8936  | 3.205329 | Stalled      | chr17:56090045-56096445   | 4.401   |
| <b>Cdkn2aip</b>      | 118 | 0   | 1.966761 | 23  | 0.383333 | 4.71605  | 36.44477 | Stalled      | chr8:48794697-48801285    | 4.589   |
| <b>Naif1</b>         | 118 | 0   | 1.966761 | 229 | 3.816667 | 7.39902  | 0.483167 | Stalled      | chr2:32303976-32310996    | 5.021   |
| <b>Cd3d</b>          | 118 | 0   | 1.966761 | 100 | 1.666667 | 1.84027  | 0.081866 | Stalled      | chr9:44787868-44795135    | 5.268   |
| <b>Dhh</b>           | 118 | 0   | 1.966761 | 18  | 0.3      | 2.31669  | 0.802132 | Unclassified | chr15:98723457-98730971   | 5.515   |
| <b>1110059G10Rik</b> | 118 | 0   | 1.966761 | 52  | 0.866667 | 3.17167  | 21.66751 | Stalled      | chr9:122854206-122862118  | 5.913   |
| <b>Snrnp27</b>       | 118 | 0   | 1.966761 | 57  | 0.95     | 17.2536  | 25.10299 | Stalled      | chr6:86625162-86636485    | 9.324   |
| <b>Mapk12</b>        | 118 | 0   | 1.966761 | 30  | 0.5      | 0.60384  | 3.030675 | Unclassified | chr15:88961014-88973133   | 10.12   |
| <b>Prmt5</b>         | 118 | 0   | 1.966761 | 263 | 4.383333 | 26.7983  | 7.608322 | Stalled      | chr14:55126018-55138307   | 10.29   |
| <b>Adat2</b>         | 118 | 44  | 1.966761 | 75  | 1.25     | 9.0728   | 22.98487 | Stalled      | chr10:13270712-13283182   | 10.471  |
| <b>Mxd4</b>          | 118 | 0   | 1.966761 | 61  | 1.016667 | 21.5553  | 23.07518 | Stalled      | chr5:34519228-34532359    | 11.132  |
| <b>Cdc26</b>         | 118 | 0   | 1.966761 | 187 | 3.116667 | 15.5718  | 20.78868 | Stalled      | chr4:62055622-62071657    | 14.036  |
| <b>Taf8</b>          | 118 | 0   | 1.966761 | 345 | 5.75     | 7.36588  | 6.615084 | Stalled      | chr17:47624998-47641236   | 14.239  |
| <b>Fam98a</b>        | 118 | 0   | 1.966761 | 162 | 2.7      | 14.5688  | 14.34582 | Stalled      | chr17:75936425-75953286   | 14.862  |
| <b>Adck2</b>         | 118 | 0   | 1.966761 | 108 | 1.8      | 6.5321   | 29.40982 | Stalled      | chr6:39521874-39538768    | 14.895  |
| <b>Cdccl102a</b>     | 118 | 0   | 1.966761 | 71  | 1.183333 | 0.951883 | 3.839855 | Stalled      | chr8:97426770-97443998    | 15.229  |
| <b>Prpf4</b>         | 118 | 0   | 1.966761 | 314 | 5.233333 | 7.78603  | 16.78248 | Stalled      | chr4:62067816-62088024    | 18.209  |
| <b>Nutf2</b>         | 118 | 0   | 1.966761 | 500 | 8.333333 | 5.15168  | 12.4097  | Stalled      | chr8:108382533-108404301  | 19.769  |
| <b>Impact</b>        | 118 | 0   | 1.966761 | 439 | 7.316667 | 2.48314  | 6.355607 | Stalled      | chr18:13128760-13151457   | 20.698  |
| <b>Adsl</b>          | 118 | 0   | 1.966761 | 574 | 9.566667 | 29.0143  | 9.261693 | Stalled      | chr15:80776948-80799803   | 20.856  |
| <b>Tmem194b</b>      | 118 | 67  | 1.966761 | 499 | 8.316667 | 6.13733  | 14.25044 | Stalled      | chr1:52685548-52708763    | 21.216  |
| <b>Faah</b>          | 118 | 0   | 1.966761 | 69  | 1.15     | 2.27301  | 5.444962 | Stalled      | chr4:115669260-115692507  | 21.248  |
| <b>Tstd2</b>         | 118 | 0   | 1.966761 | 255 | 4.25     | 4.62996  | 30.93631 | Stalled      | chr4:46127618-46153347    | 23.73   |
| <b>Pex3</b>          | 118 | 44  | 1.966761 | 127 | 2.116667 | 6.7005   | 37.60993 | Stalled      | chr10:13243751-13274948   | 29.198  |
| <b>Slc30a5</b>       | 118 | 0   | 1.966761 | 469 | 7.816667 | 15.1285  | 19.28554 | Stalled      | chr13:101572602-101605382 | 30.781  |
| <b>Cd53</b>          | 118 | 144 | 1.966761 | 401 | 6.683333 | 18.4117  | 4.354332 | Stalled      | chr3:106561778-106595067  | 31.29   |
| <b>Kif1c</b>         | 118 | 0   | 1.966761 | 204 | 3.4      | 8.43475  | 31.40723 | Stalled      | chr11:70512049-70545472   | 31.424  |
| <b>4930562C15Rik</b> | 118 | 0   | 1.966761 | 91  | 1.516667 | 0.090374 | 0        | Unclassified | chr16:4833415-4867691     | 32.277  |
| <b>Dctn4</b>         | 118 | 0   | 1.966761 | 341 | 5.683333 | 6.55195  | 32.34372 | Stalled      | chr18:60683874-60718416   | 32.543  |
| <b>Limk1</b>         | 118 | 0   | 1.966761 | 252 | 4.2      | 5.30095  | 4.005981 | Stalled      | chr5:135131908-135166460  | 32.553  |
| <b>3110049J23Rik</b> | 118 | 0   | 1.966761 | 41  | 0.683333 | 0.993911 | 86.50219 | Stalled      | chr10:62485259-62521560   | 34.302  |
| <b>Glyr1</b>         | 118 | 0   | 1.966761 | 690 | 11.5     | 30.6334  | 21.77833 | Stalled      | chr16:5013994-5052003     | 36.01   |
| <b>Ubn1</b>          | 118 | 0   | 1.966761 | 392 | 6.533333 | 10.2932  | 37.75652 | Stalled      | chr16:5048160-5086378     | 36.219  |
| <b>Slc25a25</b>      | 118 | 0   | 1.966761 | 551 | 9.183333 | 5.22152  | 12.87367 | Stalled      | chr2:32270007-32308990    | 36.984  |
| <b>Pomt2</b>         | 118 | 0   | 1.966761 | 189 | 3.15     | 4.30983  | 39.85655 | Stalled      | chr12:88447815-88490852   | 41.038  |
| <b>Agpat2</b>        | 118 | 50  | 1.966761 | 178 | 2.966667 | 2.40507  | 9.477977 | Stalled      | chr5:101273247-101328121  | 52.875  |
| <b>Ankrd27</b>       | 118 | 0   | 1.966761 | 302 | 5.033333 | 8.71086  | 20.70915 | Stalled      | chr7:36369265-36424256    | 52.992  |
| <b>D14Abb1e</b>      | 118 | 0   | 1.966761 | 292 | 4.866667 | 1.94232  | 43.1898  | Stalled      | chr14:28240032-28296740   | 54.709  |
| <b>Nceh1</b>         | 118 | 0   | 1.966761 | 482 | 8.033333 | 3.01822  | 19.1845  | Stalled      | chr3:27079925-27143833    | 61.909  |
| <b>Kif15</b>         | 118 | 0   | 1.966761 | 768 | 12.8     | 7.61474  | 19.96456 | Stalled      | chr9:122858198-122927851  | 67.654  |
| <b>Zbtb40</b>        | 118 | 0   | 1.966761 | 329 | 5.483333 | 3.52633  | 11.8136  | Stalled      | chr4:136535646-136606610  | 68.965  |
| <b>Myo5c</b>         | 118 | 0   | 1.966761 | 228 | 3.8      | 0.148496 | 0.964432 | Unclassified | chr9:75077820-75153257    | 73.438  |
| <b>Coro2b</b>        | 118 | 0   | 1.966761 | 327 | 5.45     | 1.5263   | 2.62773  | Unclassified | chr9:62267298-62386851    | 117.554 |
| <b>Rraga</b>         | 117 | 0   | 1.950093 | 26  | 0.433333 | 49.0004  | 9.559188 | Unclassified | chr4:86219576-86223185    | 1.61    |
| <b>Ddx28</b>         | 117 | 0   | 1.950093 | 28  | 0.466667 | 15.6105  | 6.365592 | Unclassified | chr8:108533516-108537386  | 1.871   |
| <b>Rpl37</b>         | 117 | 0   | 1.950093 | 162 | 2.7      | 221.269  | 5.095763 | Stalled      | chr15:5064612-5069140     | 2.529   |
| <b>Tmem208</b>       | 117 | 0   | 1.950093 | 57  | 0.95     | 24.537   | 9.490007 | Stalled      | chr8:107848263-107852955  | 2.693   |
| <b>Robld3</b>        | 117 | 0   | 1.950093 | 10  | 0.166667 | 58.4502  | 21.25681 | Stalled      | chr3:88353740-88358849    | 3.11    |
| <b>Fam36a</b>        | 117 | 0   | 1.950093 | 430 | 7.166667 | 6.96374  | 4.066805 | Stalled      | chr1:180247283-180252824  | 3.542   |
| <b>Snrnp25</b>       | 117 | 0   | 1.950093 | 38  | 0.633333 | 84.6598  | 14.8137  | Stalled      | chr11:32103414-32108993   | 3.58    |
| <b>Pycr2</b>         | 117 | 0   | 1.950093 | 130 | 2.166667 | 35.9567  | 4.408538 | Stalled      | chr1:182832404-182838218  | 3.815   |
| <b>Slc25a39</b>      | 117 | 0   | 1.950093 | 50  | 0.833333 | 32.0401  | 16.38016 | Stalled      | chr11:102264296-102270831 | 4.536   |
| <b>Mad2l2</b>        | 117 | 0   | 1.950093 | 90  | 1.5      | 17.89    | 6.744735 | Stalled      | chr4:147512598-147519805  | 5.208   |
| <b>Rab7l1</b>        | 117 | 0   | 1.950093 | 24  | 0.4      | 15.7496  | 12.4072  | Stalled      | chr1:133761853-133769462  | 5.61    |
| <b>Ciao1</b>         | 117 | 0   | 1.950093 | 149 | 2.483333 | 8.2505   | 8.428202 | Stalled      | chr2:127066673-127075552  | 6.88    |

|                      |     |    |          |      |          |          |          |              |                           |         |
|----------------------|-----|----|----------|------|----------|----------|----------|--------------|---------------------------|---------|
| <b>Stx4a</b>         | 117 | 0  | 1.950093 | 83   | 1.383333 | 51.8512  | 18.58221 | Stalled      | chr7:134983321-134992479  | 7.159   |
| <b>1700026L06Rik</b> | 117 | 0  | 1.950093 | 20   | 0.333333 | 0.381476 | 3.710345 | Unclassified | chr2:28547599-28557171    | 7.573   |
| <b>Ndufc2</b>        | 117 | 0  | 1.950093 | 79   | 1.316667 | 82.9365  | 17.66887 | Stalled      | chr7:104546512-104556309  | 7.798   |
| <b>Dbi</b>           | 117 | 0  | 1.950093 | 138  | 2.3      | 86.5477  | 16.3918  | Stalled      | chr1:122009856-122019656  | 7.801   |
| <b>BC005624</b>      | 117 | 0  | 1.950093 | 156  | 2.6      | 22.3289  | 6.282496 | Stalled      | chr2:30828355-30839406    | 9.052   |
| <b>Chchd4</b>        | 117 | 0  | 1.950093 | 317  | 5.283333 | 20.4716  | 6.716711 | Stalled      | chr6:91414269-91425417    | 9.149   |
| <b>Tpra1</b>         | 117 | 0  | 1.950093 | 93   | 1.55     | 9.71774  | 12.16537 | Stalled      | chr6:88850244-88862234    | 9.991   |
| <b>Theg</b>          | 117 | 0  | 1.950093 | 41   | 0.683333 | 0.098001 | 0.381398 | Unclassified | chr10:79039221-79051881   | 10.661  |
| <b>Usp2</b>          | 117 | 0  | 1.950093 | 125  | 2.083333 | 2.28147  | 8.0002   | Stalled      | chr9:43891002-43903710    | 10.709  |
| <b>Mical1</b>        | 117 | 0  | 1.950093 | 289  | 4.816667 | 18.2126  | 5.91971  | Stalled      | chr10:41194119-41206834   | 10.716  |
| <b>Haus4</b>         | 117 | 0  | 1.950093 | 243  | 4.05     | 18.7935  | 18.5085  | Stalled      | chr14:55160622-55175198   | 12.577  |
| <b>Tmem127</b>       | 117 | 0  | 1.950093 | 143  | 2.383333 | 8.68279  | 16.98673 | Stalled      | chr2:127071710-127086500  | 12.791  |
| <b>Asl</b>           | 117 | 0  | 1.950093 | 121  | 2.016667 | 15.6139  | 11.4889  | Stalled      | chr5:130487372-130502201  | 12.83   |
| <b>BC048403</b>      | 117 | 0  | 1.950093 | 171  | 2.85     | 4.36999  | 22.42383 | Stalled      | chr10:121174992-121189915 | 12.924  |
| <b>Prdm14</b>        | 117 | 0  | 1.950093 | 25   | 0.416667 | 0.093911 | 1.687601 | Unclassified | chr1:13103508-13119244    | 13.737  |
| <b>Lrrc29</b>        | 117 | 0  | 1.950093 | 307  | 5.116667 | 0.853089 | 13.3449  | Stalled      | chr8:107836239-107852176  | 13.938  |
| <b>Zfp14</b>         | 117 | 0  | 1.950093 | 43   | 0.716667 | 0.348769 | 20.92104 | Stalled      | chr7:30821377-30838415    | 15.039  |
| <b>Polg</b>          | 117 | 0  | 1.950093 | 427  | 7.116667 | 16.0691  | 6.171762 | Stalled      | chr7:86594268-86613159    | 16.892  |
| <b>Slc9a3r1</b>      | 117 | 0  | 1.950093 | 276  | 4.6      | 37.4604  | 15.5832  | Stalled      | chr11:115022654-115042492 | 17.839  |
| <b>Zbtb1</b>         | 117 | 0  | 1.950093 | 438  | 7.3      | 6.21983  | 18.95933 | Stalled      | chr12:77469252-77489732   | 18.481  |
| <b>Dusp14</b>        | 117 | 0  | 1.950093 | 94   | 1.566667 | 3.04163  | 7.670103 | Stalled      | chr11:83861546-83883859   | 20.314  |
| <b>2810004N23Rik</b> | 117 | 0  | 1.950093 | 246  | 4.1      | 21.6822  | 34.34764 | Stalled      | chr8:127363256-127388929  | 23.674  |
| <b>Ikbke</b>         | 117 | 0  | 1.950093 | 257  | 4.283333 | 12.0343  | 6.226083 | Stalled      | chr1:133151178-133178140  | 24.963  |
| <b>Bpgm</b>          | 117 | 0  | 1.950093 | 91   | 1.516667 | 6.42607  | 28.90615 | Stalled      | chr6:34424355-34455610    | 29.256  |
| <b>1810007M14Rik</b> | 117 | 0  | 1.950093 | 440  | 7.333333 | 9.21427  | 29.19745 | Stalled      | chr16:91014281-91046624   | 30.344  |
| <b>Trmprs4</b>       | 117 | 0  | 1.950093 | 63   | 1.05     | 0.135682 | 1.625639 | Unclassified | chr9:44980808-45014158    | 31.351  |
| <b>Fam108b</b>       | 117 | 0  | 1.950093 | 347  | 5.783333 | 5.80978  | 18.38411 | Stalled      | chr19:21725798-21760127   | 32.33   |
| <b>Tmed8</b>         | 117 | 0  | 1.950093 | 1204 | 20.06667 | 26.4008  | 3.786968 | Stalled      | chr12:88507191-88543179   | 33.989  |
| <b>Bfsp1</b>         | 117 | 0  | 1.950093 | 111  | 1.85     | 0.318787 | 2.187723 | Unclassified | chr2:143652263-143690909  | 36.647  |
| <b>Dhx40</b>         | 117 | 0  | 1.950093 | 261  | 4.35     | 5.87644  | 16.9569  | Stalled      | chr11:86582350-86623162   | 38.813  |
| <b>Atad1</b>         | 117 | 0  | 1.950093 | 570  | 9.5      | 16.09    | 33.40839 | Stalled      | chr19:32747052-32788788   | 39.737  |
| <b>Dars</b>          | 117 | 0  | 1.950093 | 474  | 7.9      | 44.7845  | 41.13043 | Stalled      | chr1:130260284-130315993  | 53.71   |
| <b>D6Wsu116e</b>     | 117 | 0  | 1.950093 | 340  | 5.666667 | 9.32145  | 28.07048 | Stalled      | chr6:116156050-116212688  | 54.639  |
| <b>Ap1b1</b>         | 117 | 0  | 1.950093 | 1007 | 16.78333 | 21.3091  | 7.177084 | Stalled      | chr11:4884907-4942732     | 55.826  |
| <b>Nup188</b>        | 117 | 0  | 1.950093 | 614  | 10.23333 | 10.1926  | 28.97332 | Stalled      | chr2:30139952-30199782    | 57.831  |
| <b>Limk2</b>         | 117 | 0  | 1.950093 | 1001 | 16.68333 | 9.23734  | 12.97655 | Stalled      | chr11:3243299-3311238     | 65.94   |
| <b>Nid1</b>          | 117 | 0  | 1.950093 | 85   | 1.416667 | 1.41008  | 0.464314 | Unclassified | chr13:13527868-13604542   | 74.675  |
| <b>Ube2g1</b>        | 117 | 0  | 1.950093 | 726  | 12.1     | 8.85527  | 37.64124 | Stalled      | chr11:72418762-72499983   | 79.222  |
| <b>Lmf1</b>          | 117 | 0  | 1.950093 | 882  | 14.7     | 15.4078  | 16.26113 | Stalled      | chr17:25714118-25799668   | 83.551  |
| <b>Whsc11i</b>       | 117 | 0  | 1.950093 | 1630 | 27.16667 | 15.3285  | 28.4517  | Stalled      | chr8:26710777-26830139    | 117.363 |
| <b>Fam178b</b>       | 117 | 0  | 1.950093 | 224  | 3.733333 | 0.056647 | 0.695737 | Unclassified | chr1:36619540-36742028    | 120.489 |
| <b>Slco3a1</b>       | 117 | 0  | 1.950093 | 725  | 12.08333 | 1.55202  | 11.92952 | Stalled      | chr7:81420303-81701666    | 279.364 |
| <b>Elmo1</b>         | 117 | 0  | 1.950093 | 6129 | 102.15   | 19.2082  | 15.26687 | Stalled      | chr13:20275293-20698394   | 421.102 |
| <b>Timm8b</b>        | 116 | 0  | 1.933426 | 25   | 0.416667 | 37.9094  | 6.144172 | Unclassified | chr9:50410005-50413425    | 1.421   |
| <b>2900092E17Rik</b> | 116 | 0  | 1.933426 | 95   | 1.583333 | 52.2184  | 2.435438 | Stalled      | chr7:134158564-134162866  | 2.303   |
| <b>Rpl15</b>         | 116 | 0  | 1.933426 | 89   | 1.483333 | 0        | 10.02172 | Stalled      | chr14:19100336-19105500   | 3.165   |
| <b>Gpr18</b>         | 116 | 50 | 1.933426 | 168  | 2.8      | 14.3499  | 3.140281 | Stalled      | chr14:122310655-122316996 | 4.342   |
| <b>Prdx2</b>         | 116 | 0  | 1.933426 | 60   | 1        | 76.8564  | 13.01682 | Stalled      | chr8:87491546-87498212    | 4.667   |
| <b>Plk3</b>          | 116 | 0  | 1.933426 | 224  | 3.733333 | 9.2024   | 4.95244  | Stalled      | chr4:116801259-116808557  | 5.299   |
| <b>Ccl22</b>         | 116 | 0  | 1.933426 | 39   | 0.65     | 38.4728  | 1.830458 | Stalled      | chr8:97267583-97275288    | 5.706   |
| <b>Fgl2</b>          | 116 | 0  | 1.933426 | 78   | 1.3      | 8.38099  | 12.65466 | Stalled      | chr5:20876490-20884204    | 5.715   |
| <b>1600002H07Rik</b> | 116 | 0  | 1.933426 | 55   | 0.916667 | 5.79399  | 9.396048 | Stalled      | chr17:24352000-24359714   | 5.715   |
| <b>Sifn1</b>         | 116 | 0  | 1.933426 | 42   | 0.7      | 0.573031 | 0.308612 | Unclassified | chr11:82928346-82936161   | 5.816   |
| <b>Tmed3</b>         | 116 | 0  | 1.933426 | 36   | 0.6      | 18.1929  | 22.40679 | Stalled      | chr9:89594040-89601881    | 5.842   |
| <b>mmu-mir-22</b>    | 116 | 46 | 1.933426 | 258  | 4.3      | ND       | ND       | Elongating   | chr11:75274041-75280192   | 6.152   |
| <b>Lhx1</b>          | 116 | 0  | 1.933426 | 14   | 0.233333 | 0.493882 | 1.61518  | Unclassified | chr11:84332880-84341036   | 6.157   |
| <b>Card9</b>         | 116 | 0  | 1.933426 | 52   | 0.866667 | 1.77386  | 1.392259 | Unclassified | chr2:26207831-26217067    | 7.237   |
| <b>Sdhd</b>          | 116 | 0  | 1.933426 | 104  | 1.733333 | 37.3843  | 21.56058 | Stalled      | chr9:50404445-50413954    | 7.51    |
| <b>Qars</b>          | 116 | 0  | 1.933426 | 146  | 2.433333 | 36.844   | 8.437851 | Stalled      | chr9:108408335-108418272  | 7.938   |
| <b>Kif20a</b>        | 116 | 0  | 1.933426 | 310  | 5.166667 | 17.992   | 6.895422 | Stalled      | chr18:34782589-34792931   | 8.343   |
| <b>D330012F22Rik</b> | 116 | 0  | 1.933426 | 54   | 0.9      | 3.93137  | 31.57019 | Stalled      | chr7:87375778-87386306    | 8.529   |
| <b>Tmem120a</b>      | 116 | 0  | 1.933426 | 72   | 1.2      | 4.78272  | 6.36444  | Stalled      | chr5:136211359-136222042  | 8.684   |
| <b>1700030J22Rik</b> | 116 | 0  | 1.933426 | 25   | 0.416667 | 1.38006  | 4.004558 | Unclassified | chr8:119493498-119504843  | 9.346   |
| <b>Coq4</b>          | 116 | 0  | 1.933426 | 71   | 1.183333 | 4.93951  | 4.588787 | Stalled      | chr2:29641782-29653263    | 9.482   |
| <b>Kdelr1</b>        | 116 | 0  | 1.933426 | 138  | 2.3      | 31.6706  | 7.889646 | Stalled      | chr7:53126209-53139096    | 10.888  |
| <b>Trub2</b>         | 116 | 0  | 1.933426 | 240  | 4        | 8.35694  | 4.468243 | Stalled      | chr2:29631630-29645191    | 11.562  |
| <b>Tnni1</b>         | 116 | 0  | 1.933426 | 29   | 0.483333 | 2.30747  | 0.267122 | Unclassified | chr1:137693997-137707566  | 11.57   |
| <b>Adamts14</b>      | 116 | 0  | 1.933426 | 150  | 2.5      | 0.784032 | 1.260233 | Elongating   | chr3:95480126-95493781    | 11.656  |
| <b>Oas1c</b>         | 116 | 0  | 1.933426 | 69   | 1.15     | 3.58129  | 22.26286 | Stalled      | chr5:121250207-121264523  | 12.317  |
| <b>Nkiras1</b>       | 116 | 0  | 1.933426 | 120  | 2        | 2.45329  | 34.44851 | Stalled      | chr14:19101655-19116514   | 12.86   |
| <b>Rcc1</b>          | 116 | 0  | 1.933426 | 577  | 9.616667 | 28.5295  | 6.718452 | Stalled      | chr4:131887838-131903577  | 13.74   |
| <b>Pdc2</b>          | 116 | 0  | 1.933426 | 106  | 1.766667 | 20.7018  | 18.72359 | Stalled      | chr13:74440568-74456774   | 14.207  |
| <b>Slc25a44</b>      | 116 | 0  | 1.933426 | 168  | 2.8      | 9.24082  | 8.036649 | Stalled      | chr3:88214419-88231061    | 14.643  |
| <b>Hmgcl</b>         | 116 | 0  | 1.933426 | 255  | 4.25     | 17.2119  | 8.925601 | Stalled      | chr4:135500367-135518532  | 16.166  |
| <b>Ttc14</b>         | 116 | 0  | 1.933426 | 234  | 3.9      | 4.87325  | 25.99901 | Stalled      | chr3:33697116-33715556    | 16.441  |
| <b>0610037P05Rik</b> | 116 | 0  | 1.933426 | 204  | 3.4      | 6.29437  | 20.2523  | Stalled      | chr16:14299336-14319425   | 18.09   |
| <b>Ehd2</b>          | 116 | 0  | 1.933426 | 126  | 2.1      | 4.39179  | 2.811912 | Elongating   | chr7:16534335-16554884    | 18.55   |
| <b>Psm5</b>          | 116 | 0  | 1.933426 | 217  | 3.616667 | 12.2926  | 34.09473 | Stalled      | chr2:34707608-34728482    | 18.875  |
| <b>Hsph1</b>         | 116 | 0  | 1.933426 | 130  | 2.166667 | 24.5748  | 17.41796 | Stalled      | chr5:150419419-150440890  | 19.472  |
| <b>0610011L14Rik</b> | 116 | 0  | 1.933426 | 376  | 6.266667 | 8.29726  | 10.18876 | Stalled      | chr2:156371311-156394708  | 21.398  |
| <b>2400003C14Rik</b> | 116 | 0  | 1.933426 | 413  | 6.883333 | 16.3426  | 17.59215 | Stalled      | chr8:112195221-112219194  | 21.974  |
| <b>Nol11</b>         | 116 | 0  | 1.933426 | 404  | 6.733333 | 9.25651  | 9.744715 | Stalled      | chr11:107027976-107052695 | 22.72   |
| <b>Morf41i</b>       | 116 | 0  | 1.933426 | 567  | 9.45     | 7.25524  | 5.188548 | Stalled      | chr9:89986508-90011658    | 23.151  |
| <b>Paip2b</b>        | 116 | 0  | 1.933426 | 201  | 3.35     | 6.21545  | 32.26538 | Stalled      | chr6:83756052-83783735    | 25.684  |
| <b>Ctcf1</b>         | 116 | 0  | 1.933426 | 53   | 0.883333 | 0.11155  | 0.639595 | Unclassified | chr2:172919109-172947026  | 25.918  |
| <b>Brd8</b>          | 116 | 0  | 1.933426 | 483  | 8.05     | 25.9096  | 16.26262 | Stalled      | chr18:34758268-34786464   | 26.197  |

|                      |     |    |          |      |          |          |          |              |                           |         |
|----------------------|-----|----|----------|------|----------|----------|----------|--------------|---------------------------|---------|
| <b>Entpd4</b>        | 116 | 0  | 1.933426 | 242  | 4.033333 | 5.02753  | 13.8425  | Stalled      | chr14:69953207-69984799   | 29.593  |
| <b>Snrnp200</b>      | 116 | 0  | 1.933426 | 553  | 9.216667 | 22.7631  | 9.569094 | Stalled      | chr2:127032139-127066187  | 32.049  |
| <b>Cnnp3</b>         | 116 | 0  | 1.933426 | 138  | 2.3      | 0.105451 | 0.226119 | Unclassified | chr2:120287328-120330649  | 41.322  |
| <b>Plekhhg3</b>      | 116 | 0  | 1.933426 | 299  | 4.983333 | 1.92669  | 15.79907 | Stalled      | chr12:77632546-77680026   | 45.481  |
| <b>Cds2</b>          | 116 | 0  | 1.933426 | 695  | 11.58333 | 9.37742  | 7.527016 | Stalled      | chr2:132086992-132137777  | 48.786  |
| <b>Phldb1</b>        | 116 | 0  | 1.933426 | 215  | 3.583333 | 1.02138  | 4.554031 | Stalled      | chr9:44494390-44545277    | 48.888  |
| <b>Mapre3</b>        | 116 | 0  | 1.933426 | 105  | 1.75     | 1.51276  | 3.889387 | Unclassified | chr5:31115128-311168479   | 51.352  |
| <b>Fbxo42</b>        | 116 | 0  | 1.933426 | 567  | 9.45     | 6.76285  | 16.48564 | Stalled      | chr4:140701836-140759977  | 56.142  |
| <b>Raver2</b>        | 116 | 0  | 1.933426 | 270  | 4.5      | 0.109346 | 0.467363 | Unclassified | chr4:100739642-100824975  | 83.334  |
| <b>Pcmttd1</b>       | 116 | 0  | 1.933426 | 275  | 4.583333 | 2.93399  | 84.9445  | Stalled      | chr1:7077000-7163709      | 84.71   |
| <b>Znrf1</b>         | 116 | 0  | 1.933426 | 593  | 9.883333 | 8.64142  | 14.39922 | Stalled      | chr8:114058539-114149930  | 89.392  |
| <b>Ly75</b>          | 116 | 0  | 1.933426 | 2126 | 35.43333 | 12.3065  | 11.22656 | Stalled      | chr2:60131816-60223288    | 89.473  |
| <b>Il1r1</b>         | 116 | 0  | 1.933426 | 151  | 2.516667 | 0.154927 | 0.747403 | Unclassified | chr1:40279924-40373022    | 91.099  |
| <b>Cpped1</b>        | 116 | 0  | 1.933426 | 409  | 6.816667 | 4.11917  | 38.52229 | Stalled      | chr16:11803813-11911516   | 105.704 |
| <b>Itsn2</b>         | 116 | 0  | 1.933426 | 1521 | 25.35    | 20.5661  | 21.56321 | Stalled      | chr12:4597813-4720758     | 120.946 |
| <b>Ncoa2</b>         | 116 | 0  | 1.933426 | 2353 | 39.21667 | 5.43783  | 16.45758 | Stalled      | chr1:13129239-13366164    | 234.926 |
| <b>Smg6</b>          | 116 | 0  | 1.933426 | 1490 | 24.83333 | 4.2295   | 36.58055 | Stalled      | chr11:74737373-74977950   | 238.578 |
| <b>Hist1h4c</b>      | 115 | 41 | 1.916759 | 0    | 0        | 0        | 374      | Unclassified | chr13:23790006-23792318   | 0.313   |
| <b>1810046J19Rik</b> | 115 | 0  | 1.916759 | 8    | 0.133333 | 28.6442  | 5.141512 | Unclassified | chr11:98299021-98302302   | 1.282   |
| <b>Dolk</b>          | 115 | 0  | 1.916759 | 21   | 0.35     | 10.9443  | 17.4701  | Stalled      | chr2:30139748-30143874    | 2.127   |
| <b>Nhlrc1</b>        | 115 | 0  | 1.916759 | 2    | 0.033333 | 0.879668 | 13.35641 | Stalled      | chr13:47107926-47112219   | 2.294   |
| <b>1110008P14Rik</b> | 115 | 0  | 1.916759 | 74   | 1.233333 | 13.7716  | 2.443178 | Stalled      | chr2:32234620-32239435    | 2.816   |
| <b>G630016D24Rik</b> | 115 | 0  | 1.916759 | 110  | 1.833333 | 7.97785  | 0.171902 | Stalled      | chr14:52634539-52639462   | 2.924   |
| <b>Rpl27a</b>        | 115 | 0  | 1.916759 | 247  | 4.116667 | 102.605  | 5.728706 | Stalled      | chr7:116660708-116665883  | 3.176   |
| <b>Rheb1c</b>        | 115 | 0  | 1.916759 | 52   | 0.866667 | 6.04768  | 9.229714 | Stalled      | chr15:98708191-98713845   | 3.655   |
| <b>Rpl19</b>         | 115 | 0  | 1.916759 | 251  | 4.183333 | 0        | 5.046181 | Stalled      | chr11:97886023-97891806   | 3.784   |
| <b>Rnlz</b>          | 115 | 0  | 1.916759 | 90   | 1.5      | 10.975   | 4.409375 | Stalled      | chr2:26203638-26209630    | 3.993   |
| <b>Pars2</b>         | 115 | 0  | 1.916759 | 76   | 1.266667 | 3.24253  | 10.63347 | Stalled      | chr4:106321673-106327887  | 4.215   |
| <b>Ptgir</b>         | 115 | 0  | 1.916759 | 203  | 3.383333 | 4.1319   | 0.993232 | Elongating   | chr7:17489838-17496254    | 4.417   |
| <b>Sdc20</b>         | 115 | 0  | 1.916759 | 146  | 2.433333 | 62.8277  | 6.890581 | Stalled      | chr4:118105505-118111948  | 4.444   |
| <b>C135a4</b>        | 115 | 0  | 1.916759 | 91   | 1.516667 | 17.174   | 14.57302 | Stalled      | chr18:36836868-36843516   | 4.649   |
| <b>Klf4</b>          | 115 | 0  | 1.916759 | 14   | 0.233333 | 1.2656   | 23.66412 | Stalled      | chr4:55540008-55547347    | 5.34    |
| <b>Rbm7</b>          | 115 | 0  | 1.916759 | 59   | 0.983333 | 16.1792  | 42.28961 | Stalled      | chr9:48296813-48305410    | 6.598   |
| <b>Ccdc86</b>        | 115 | 0  | 1.916759 | 225  | 3.75     | 12.8372  | 4.567866 | Stalled      | chr19:11015970-11025756   | 7.787   |
| <b>Apbb3</b>         | 115 | 0  | 1.916759 | 69   | 1.15     | 9.70467  | 35.85155 | Stalled      | chr18:36830812-36841020   | 8.209   |
| <b>Terf2ip</b>       | 115 | 0  | 1.916759 | 27   | 0.45     | 11.0402  | 45.53513 | Stalled      | chr8:114533258-114544428  | 9.171   |
| <b>Upk1a</b>         | 115 | 0  | 1.916759 | 63   | 1.05     | 0.288791 | 0.587246 | Unclassified | chr7:31388110-31399493    | 9.384   |
| <b>Ddx49</b>         | 115 | 0  | 1.916759 | 277  | 4.616667 | 24.2765  | 7.337395 | Stalled      | chr8:72816764-72828351    | 9.588   |
| <b>Sectm1b</b>       | 115 | 0  | 1.916759 | 20   | 0.333333 | 0.016559 | 0.94154  | Unclassified | chr11:120914736-120926883 | 10.148  |
| <b>Cope</b>          | 115 | 0  | 1.916759 | 237  | 3.95     | 110.133  | 9.161864 | Stalled      | chr8:72824683-72836889    | 10.207  |
| <b>Cript</b>         | 115 | 0  | 1.916759 | 47   | 0.783333 | 6.17152  | 40.28525 | Stalled      | chr17:87422900-87435148   | 10.249  |
| <b>Tas1r1</b>        | 115 | 0  | 1.916759 | 28   | 0.466667 | 2.22694  | 1.274416 | Unclassified | chr4:151402022-151414599  | 10.578  |
| <b>Gnpda1</b>        | 115 | 0  | 1.916759 | 152  | 2.533333 | 14.2932  | 10.17102 | Stalled      | chr18:38487190-38500647   | 11.458  |
| <b>Tnfaiip811</b>    | 115 | 0  | 1.916759 | 124  | 2.066667 | 2.69859  | 6.615873 | Stalled      | chr17:56299913-56313378   | 11.466  |
| <b>Pqlc2</b>         | 115 | 0  | 1.916759 | 159  | 2.65     | 3.0919   | 10.41579 | Stalled      | chr4:138853919-138868615  | 12.697  |
| <b>Soat2</b>         | 115 | 0  | 1.916759 | 43   | 0.716667 | 0.681039 | 4.757049 | Stalled      | chr15:101979005-101993867 | 12.863  |
| <b>Dnalc4</b>        | 115 | 0  | 1.916759 | 105  | 1.75     | 5.6865   | 9.347291 | Stalled      | chr15:79591878-79606897   | 13.02   |
| <b>Dtwd1</b>         | 115 | 0  | 1.916759 | 61   | 1.016667 | 3.35184  | 48.29111 | Stalled      | chr2:125975876-125991012  | 13.137  |
| <b>Armcc6</b>        | 115 | 0  | 1.916759 | 100  | 1.666667 | 7.3225   | 47.0904  | Stalled      | chr8:72744091-72760321    | 14.231  |
| <b>Oasl2</b>         | 115 | 0  | 1.916759 | 148  | 2.466667 | 5.15053  | 4.497255 | Stalled      | chr5:115344942-115362254  | 15.313  |
| <b>Fcgr2b</b>        | 115 | 0  | 1.916759 | 261  | 4.35     | 27.6208  | 4.530752 | Stalled      | chr1:172890688-172908202  | 15.515  |
| <b>Ddx24</b>         | 115 | 0  | 1.916759 | 744  | 12.4     | 41.2877  | 5.566612 | Stalled      | chr12:104646185-104665990 | 17.806  |
| <b>Ifrd1</b>         | 115 | 0  | 1.916759 | 510  | 8.5      | 7.62507  | 18.12207 | Stalled      | chr12:40929716-40951776   | 20.061  |
| <b>3110002H16Rik</b> | 115 | 0  | 1.916759 | 301  | 5.016667 | 6.95084  | 15.87821 | Stalled      | chr18:12325238-12348478   | 21.241  |
| <b>Cecr5</b>         | 115 | 0  | 1.916759 | 245  | 4.083333 | 8.49664  | 16.75162 | Stalled      | chr6:120459511-120483317  | 21.807  |
| <b>Dnttip1</b>       | 115 | 0  | 1.916759 | 431  | 7.183333 | 23.326   | 4.079826 | Stalled      | chr2:164569514-164593719  | 22.206  |
| <b>Zfp142</b>        | 115 | 0  | 1.916759 | 339  | 5.65     | 4.80479  | 18.02399 | Stalled      | chr1:74611701-74636602    | 22.902  |
| <b>Tmem50b</b>       | 115 | 0  | 1.916759 | 347  | 5.783333 | 12.3289  | 8.949509 | Stalled      | chr16:91574752-91599925   | 23.174  |
| <b>Ncapd2</b>        | 115 | 0  | 1.916759 | 651  | 10.85    | 47.9351  | 10.59352 | Stalled      | chr6:125118024-125143604  | 23.581  |
| <b>Tfrc</b>          | 115 | 0  | 1.916759 | 251  | 4.183333 | 9.27975  | 31.60663 | Stalled      | chr16:32607106-32632876   | 23.771  |
| <b>Pigf</b>          | 115 | 0  | 1.916759 | 164  | 2.733333 | 5.15125  | 36.21207 | Stalled      | chr17:87396598-87426741   | 28.144  |
| <b>Kpnb1</b>         | 115 | 0  | 1.916759 | 1450 | 24.16667 | 49.5207  | 8.98046  | Stalled      | chr11:97021023-97051206   | 28.184  |
| <b>Ube2d3</b>        | 115 | 0  | 1.916759 | 676  | 11.26667 | 26.202   | 24.63684 | Stalled      | chr3:135099722-135130142  | 28.421  |
| <b>Sfrs14</b>        | 115 | 0  | 1.916759 | 674  | 11.23333 | 8.9584   | 14.41954 | Stalled      | chr8:72756124-72787004    | 28.881  |
| <b>Bach1</b>         | 115 | 0  | 1.916759 | 552  | 9.2      | 2.55637  | 10.55339 | Stalled      | chr16:87697198-87733591   | 34.394  |
| <b>Nisch</b>         | 115 | 0  | 1.916759 | 982  | 16.36667 | 31.3736  | 7.962238 | Stalled      | chr14:31984113-32022012   | 35.9    |
| <b>Nmt1</b>          | 115 | 0  | 1.916759 | 906  | 15.1     | 54.4197  | 8.452445 | Stalled      | chr11:102887875-102927419 | 37.545  |
| <b>Qrich1</b>        | 115 | 0  | 1.916759 | 966  | 16.1     | 11.4644  | 15.1533  | Stalled      | chr9:108417417-108462498  | 43.082  |
| <b>Fanca</b>         | 115 | 0  | 1.916759 | 553  | 9.216667 | 5.62247  | 24.16189 | Stalled      | chr8:125792143-125844476  | 50.334  |
| <b>Nrd1</b>          | 115 | 0  | 1.916759 | 537  | 8.95     | 29.3993  | 31.34174 | Stalled      | chr4:108671409-108734376  | 60.968  |
| <b>Lpar3</b>         | 115 | 0  | 1.916759 | 82   | 1.366667 | 0.159305 | 3.075348 | Unclassified | chr3:145881924-145949178  | 65.255  |
| <b>Ap2a2</b>         | 115 | 0  | 1.916759 | 571  | 9.516667 | 9.73904  | 17.10864 | Stalled      | chr7:148746078-148818910  | 70.833  |
| <b>Rsu1</b>          | 115 | 0  | 1.916759 | 551  | 9.183333 | 11.0799  | 29.08397 | Stalled      | chr2:12998635-13194905    | 194.271 |
| <b>Gsg1l</b>         | 115 | 0  | 1.916759 | 309  | 5.15     | 0.088858 | 0.396477 | Unclassified | chr7:133021932-133227925  | 203.994 |
| <b>Rapgef5</b>       | 115 | 0  | 1.916759 | 1955 | 32.58333 | 1.94461  | 0        | Stalled      | chr12:118752951-118995451 | 240.501 |
| <b>2310039H08Rik</b> | 114 | 0  | 1.900091 | 0    | 0        | 28.2118  | 425      | Unclassified | chr17:46907583-46910356   | 0.774   |
| <b>Scgb1c1</b>       | 114 | 0  | 1.900091 | 1    | 0.016667 | 0        | 1.537313 | Unclassified | chr7:148029463-148032668  | 1.206   |
| <b>Spsb2</b>         | 114 | 0  | 1.900091 | 73   | 1.216667 | 7.39672  | 0.568035 | Elongating   | chr6:124756958-124760632  | 1.675   |
| <b>Ubb</b>           | 114 | 0  | 1.900091 | 20   | 0.333333 | 300.286  | 11.96475 | Unclassified | chr11:62363005-62366714   | 1.71    |
| <b>1110038F14Rik</b> | 114 | 0  | 1.900091 | 3    | 0.05     | 36.9079  | 38.31821 | Stalled      | chr15:76776973-76781161   | 2.189   |
| <b>Ndufa4l2</b>      | 114 | 0  | 1.900091 | 198  | 3.3      | 0.239807 | 0.494822 | Stalled      | chr10:126949994-126954210 | 2.217   |
| <b>Fut1</b>          | 114 | 0  | 1.900091 | 20   | 0.333333 | 1.34207  | 5.02552  | Stalled      | chr7:52870975-52876427    | 3.453   |
| <b>Myd88</b>         | 114 | 0  | 1.900091 | 69   | 1.15     | 27.4956  | 6.823965 | Stalled      | chr9:119245105-119251158  | 4.054   |
| <b>Rrp8</b>          | 114 | 0  | 1.900091 | 93   | 1.55     | 10.5849  | 8.002264 | Stalled      | chr7:112880722-112887014  | 4.293   |
| <b>Fuz</b>           | 114 | 0  | 1.900091 | 196  | 3.266667 | 13.3302  | 2.914336 | Stalled      | chr7:52149448-52155993    | 4.546   |
| <b>Dhrs13</b>        | 114 | 0  | 1.900091 | 56   | 0.933333 | 3.07099  | 8.270936 | Stalled      | chr11:77843814-77851366   | 5.553   |

|                      |     |    |          |      |          |          |          |              |                           |         |
|----------------------|-----|----|----------|------|----------|----------|----------|--------------|---------------------------|---------|
| <b>9130011J15Rik</b> | 114 | 0  | 1.900091 | 114  | 1.9      | 6.37809  | 12.61458 | Stalled      | chr8:75089096-75096947    | 5.852   |
| <b>Ilk</b>           | 114 | 0  | 1.900091 | 217  | 3.616667 | 22.2031  | 5.665494 | Stalled      | chr7:112883238-112891439  | 6.202   |
| <b>Arl5c</b>         | 114 | 0  | 1.900091 | 152  | 2.533333 | 26.1716  | 2.52067  | Elongating   | chr11:97850893-97859487   | 6.595   |
| <b>Phospho1</b>      | 114 | 0  | 1.900091 | 118  | 1.966667 | 29.1126  | 5.008416 | Stalled      | chr11:95683813-95693453   | 7.641   |
| <b>Gpr65</b>         | 114 | 0  | 1.900091 | 260  | 4.333333 | 5.68652  | 1.228267 | Elongating   | chr12:99504866-99514842   | 7.977   |
| <b>Abhd4</b>         | 114 | 0  | 1.900091 | 47   | 0.783333 | 3.50403  | 9.684446 | Stalled      | chr14:54876971-54888840   | 9.87    |
| <b>Mphosph6</b>      | 114 | 0  | 1.900091 | 218  | 3.633333 | 13.0533  | 10.8677  | Stalled      | chr8:120315544-120327829  | 10.286  |
| <b>Zfp87</b>         | 114 | 0  | 1.900091 | 71   | 1.183333 | 3.51412  | 23.61252 | Stalled      | chr13:67616717-67629167   | 10.451  |
| <b>Harbi1</b>        | 114 | 0  | 1.900091 | 42   | 0.7      | 6.13887  | 35.5891  | Stalled      | chr2:91549106-91561723    | 10.618  |
| <b>Bub3</b>          | 114 | 0  | 1.900091 | 290  | 4.833333 | 52.7595  | 8.91752  | Stalled      | chr7:138701904-138715412  | 11.509  |
| <b>Glipr1</b>        | 114 | 0  | 1.900091 | 357  | 5.95     | 71.9082  | 2.29408  | Elongating   | chr10:111422503-111436320 | 11.818  |
| <b>5830415F09Rik</b> | 114 | 0  | 1.900091 | 107  | 1.783333 | 3.69308  | 60.12579 | Stalled      | chr4:46389846-46404295    | 12.45   |
| <b>Nop2</b>          | 114 | 0  | 1.900091 | 684  | 11.4     | 33.695   | 8.359698 | Stalled      | chr6:125079900-125094771  | 12.872  |
| <b>Vps11</b>         | 114 | 0  | 1.900091 | 146  | 2.433333 | 9.92459  | 12.04654 | Stalled      | chr9:44156187-44171753    | 13.567  |
| <b>Ccs</b>           | 114 | 0  | 1.900091 | 83   | 1.383333 | 16.1137  | 8.777486 | Stalled      | chr19:4825365-4841322     | 13.958  |
| <b>Sgol1</b>         | 114 | 0  | 1.900091 | 183  | 3.05     | 4.39003  | 27.74431 | Stalled      | chr17:53814111-53830640   | 14.53   |
| <b>Mib2</b>          | 114 | 0  | 1.900091 | 184  | 3.066667 | 9.41667  | 3.130433 | Stalled      | chr4:155028580-155045336  | 14.757  |
| <b>Eaf1</b>          | 114 | 0  | 1.900091 | 238  | 3.966667 | 10.8539  | 17.73262 | Stalled      | chr14:32306264-32323043   | 14.78   |
| <b>BC003267</b>      | 114 | 0  | 1.900091 | 108  | 1.8      | 2.90737  | 26.41281 | Stalled      | chr8:4611169-4630231      | 17.063  |
| <b>2810021J22Rik</b> | 114 | 0  | 1.900091 | 76   | 1.266667 | 0.774327 | 13.28556 | Stalled      | chr11:58678741-58697840   | 17.1    |
| <b>Mdc1</b>          | 114 | 0  | 1.900091 | 201  | 3.35     | 4.79929  | 18.81336 | Stalled      | chr17:35976442-35996615   | 18.174  |
| <b>Exoc7</b>         | 114 | 0  | 1.900091 | 172  | 2.866667 | 6.76482  | 10.65967 | Stalled      | chr11:116149311-116170052 | 18.742  |
| <b>Tead3</b>         | 114 | 0  | 1.900091 | 898  | 14.96667 | 0.250242 | 0.178127 | Stalled      | chr17:28468619-28489750   | 19.132  |
| <b>Lipp</b>          | 114 | 0  | 1.900091 | 147  | 2.45     | 2.87298  | 17.33372 | Stalled      | chr18:75098975-75122917   | 21.943  |
| <b>Cpz</b>           | 114 | 0  | 1.900091 | 34   | 0.566667 | 0.053082 | 0        | Unclassified | chr5:35844866-35870275    | 23.41   |
| <b>Bruno15</b>       | 114 | 0  | 1.900091 | 60   | 1        | 0.472949 | 1.09031  | Unclassified | chr10:80921972-80947454   | 23.483  |
| <b>Ywhaz</b>         | 114 | 0  | 1.900091 | 1485 | 24.75    | 42.8017  | 5.555588 | Stalled      | chr15:36700018-36726293   | 24.276  |
| <b>4930455C21Rik</b> | 114 | 0  | 1.900091 | 172  | 2.866667 | 8.85292  | 60.83013 | Stalled      | chr16:38497924-38524747   | 24.824  |
| <b>Max</b>           | 114 | 0  | 1.900091 | 507  | 8.45     | 36.285   | 11.60704 | Stalled      | chr12:78038255-78065235   | 24.981  |
| <b>Copz1</b>         | 114 | 56 | 1.900091 | 334  | 5.566667 | 28.8491  | 12.25499 | Stalled      | chr15:103101348-103130295 | 26.948  |
| <b>Terf2</b>         | 114 | 0  | 1.900091 | 533  | 8.883333 | 16.4737  | 7.341146 | Stalled      | chr8:109593301-109622445  | 27.145  |
| <b>Noc3l</b>         | 114 | 0  | 1.900091 | 255  | 4.25     | 4.69023  | 16.36978 | Stalled      | chr19:38862617-38895727   | 31.111  |
| <b>Pigg</b>          | 114 | 0  | 1.900091 | 201  | 3.35     | 2.29503  | 53.20263 | Stalled      | chr5:108739943-108777798  | 35.856  |
| <b>D2Ert391e</b>     | 114 | 0  | 1.900091 | 300  | 5        | 9.68246  | 20.24428 | Stalled      | chr2:91514781-91552733    | 35.953  |
| <b>Gosr1</b>         | 114 | 0  | 1.900091 | 467  | 7.783333 | 4.44389  | 10.79461 | Stalled      | chr11:76540103-76579057   | 36.955  |
| <b>1300002K09Rik</b> | 114 | 0  | 1.900091 | 72   | 1.2      | 0.071083 | 0.679662 | Unclassified | chr4:45859818-45899880    | 38.063  |
| <b>Plaa</b>          | 114 | 0  | 1.900091 | 245  | 4.083333 | 6.34422  | 27.88742 | Stalled      | chr4:94231829-94271938    | 38.11   |
| <b>Sec23ip</b>       | 114 | 0  | 1.900091 | 353  | 5.883333 | 10.9542  | 29.52459 | Stalled      | chr7:135886383-13592347   | 39.965  |
| <b>2210012G02Rik</b> | 114 | 0  | 1.900091 | 322  | 5.366667 | 3.0132   | 33.00733 | Stalled      | chr4:106806766-106852917  | 44.206  |
| <b>Phf12</b>         | 114 | 0  | 1.900091 | 926  | 15.43333 | 21.8719  | 16.28193 | Stalled      | chr11:77794317-77844035   | 47.719  |
| <b>Lrrn2</b>         | 114 | 0  | 1.900091 | 93   | 1.55     | 0.019431 | 1.546239 | Unclassified | chr1:134774931-134836534  | 59.604  |
| <b>Saps2</b>         | 114 | 0  | 1.900091 | 648  | 10.8     | 4.96312  | 13.68475 | Stalled      | chr15:89039989-89116692   | 74.704  |
| <b>B4galnt3</b>      | 114 | 0  | 1.900091 | 127  | 2.116667 | 0.307315 | 1.656297 | Unclassified | chr6:120153827-120246577  | 90.751  |
| <b>Wdfy2</b>         | 114 | 0  | 1.900091 | 799  | 13.31667 | 14.0447  | 9.278537 | Stalled      | chr14:63454526-63575723   | 119.198 |
| <b>Lrrc28</b>        | 114 | 0  | 1.900091 | 339  | 5.65     | 1.39333  | 106.6493 | Stalled      | chr7:74658296-74792122    | 131.827 |
| <b>Zfat</b>          | 114 | 0  | 1.900091 | 520  | 8.666667 | 1.43881  | 81.77675 | Stalled      | chr15:67915300-68092418   | 175.119 |
| <b>Tiam2</b>         | 114 | 0  | 1.900091 | 260  | 4.333333 | 0.275362 | 5.094687 | Unclassified | chr17:3324572-3519397     | 192.826 |
| <b>Dysf</b>          | 114 | 0  | 1.900091 | 261  | 4.35     | 0.097714 | 0.871239 | Unclassified | chr6:83956583-84161036    | 202.454 |
| <b>Id2</b>           | 113 | 0  | 1.883424 | 8    | 0.133333 | 13.2703  | 27.02851 | Stalled      | chr12:25778663-25782957   | 2.295   |
| <b>C030006K11Rik</b> | 113 | 0  | 1.883424 | 90   | 1.5      | 0        | 3.899038 | Stalled      | chr15:76551895-76556275   | 2.381   |
| <b>2810405K02Rik</b> | 113 | 0  | 1.883424 | 6    | 0.1      | 5.05986  | 14.8457  | Stalled      | chr4:154270538-154275152  | 2.615   |
| <b>Ube2m</b>         | 113 | 0  | 1.883424 | 75   | 1.25     | 88.4552  | 10.11827 | Stalled      | chr7:13620587-13625327    | 2.741   |
| <b>0610009B22Rik</b> | 113 | 0  | 1.883424 | 12   | 0.2      | 8.2565   | 46.91229 | Stalled      | chr11:51498886-51504136   | 3.251   |
| <b>Chrac1</b>        | 113 | 0  | 1.883424 | 89   | 1.483333 | 36.1991  | 18.05449 | Stalled      | chr15:72918841-72924505   | 3.665   |
| <b>Scrn2</b>         | 113 | 0  | 1.883424 | 21   | 0.35     | 8.26476  | 5.763412 | Stalled      | chr11:96889265-96895272   | 4.008   |
| <b>Tmed4</b>         | 113 | 0  | 1.883424 | 25   | 0.416667 | 19.3783  | 22.55556 | Stalled      | chr11:6170716-6176840     | 4.125   |
| <b>Adprhl2</b>       | 113 | 0  | 1.883424 | 149  | 2.483333 | 19.2677  | 6.814038 | Stalled      | chr4:125993594-126000947  | 5.354   |
| <b>Mad2l1</b>        | 113 | 0  | 1.883424 | 51   | 0.85     | 22.2034  | 24.69293 | Stalled      | chr6:66483461-66490985    | 5.525   |
| <b>Hic1</b>          | 113 | 0  | 1.883424 | 200  | 3.333333 | 1.27181  | 0.733512 | Stalled      | chr11:74978066-74985757   | 5.692   |
| <b>Fbxo2</b>         | 113 | 0  | 1.883424 | 17   | 0.283333 | 1.94161  | 4.368535 | Stalled      | chr4:147532776-147540526  | 5.751   |
| <b>Gba</b>           | 113 | 0  | 1.883424 | 190  | 3.166667 | 11.5113  | 0.610382 | Stalled      | chr3:89004849-89012603    | 5.755   |
| <b>Thap1</b>         | 113 | 0  | 1.883424 | 65   | 1.083333 | 6.3031   | 32.26097 | Stalled      | chr8:27266640-27274623    | 5.984   |
| <b>Arl10</b>         | 113 | 0  | 1.883424 | 93   | 1.55     | 4.6016   | 2.189979 | Elongating   | chr13:54674373-54682488   | 6.116   |
| <b>Sf3a2</b>         | 113 | 0  | 1.883424 | 308  | 5.133333 | 44.3604  | 10.30546 | Stalled      | chr10:80259479-80267667   | 6.189   |
| <b>Tmem126a</b>      | 113 | 0  | 1.883424 | 188  | 3.133333 | 10.8757  | 7.217088 | Stalled      | chr7:97599221-97607718    | 6.498   |
| <b>Trim17</b>        | 113 | 0  | 1.883424 | 137  | 2.283333 | 0.213605 | 0.627648 | Stalled      | chr11:58775282-58785231   | 7.95    |
| <b>Trp53inp2</b>     | 113 | 0  | 1.883424 | 142  | 2.366667 | 5.78854  | 7.368809 | Stalled      | chr2:155205591-155215583  | 7.993   |
| <b>Tfpt</b>          | 113 | 0  | 1.883424 | 185  | 3.083333 | 25.308   | 7.077422 | Stalled      | chr7:3571925-3583486      | 9.562   |
| <b>Prpf19</b>        | 113 | 0  | 1.883424 | 233  | 3.883333 | 41.7951  | 9.15551  | Stalled      | chr19:10967781-10980021   | 10.241  |
| <b>Oxsm</b>          | 113 | 0  | 1.883424 | 234  | 3.9      | 2.67897  | 9.978415 | Stalled      | chr14:17071172-17084322   | 11.151  |
| <b>Pcgf2</b>         | 113 | 0  | 1.883424 | 107  | 1.783333 | 1.20478  | 4.264013 | Stalled      | chr11:97550136-97563811   | 11.676  |
| <b>Stard4</b>        | 113 | 0  | 1.883424 | 203  | 3.383333 | 25.2335  | 14.83119 | Stalled      | chr18:33361074-33375470   | 12.397  |
| <b>Park7</b>         | 113 | 0  | 1.883424 | 233  | 3.883333 | 115.52   | 13.38952 | Stalled      | chr4:150271241-150286030  | 12.79   |
| <b>Psmk3</b>         | 113 | 0  | 1.883424 | 421  | 7.016667 | 75.9543  | 7.425337 | Stalled      | chr11:98541867-98557292   | 13.426  |
| <b>Caln2</b>         | 113 | 0  | 1.883424 | 292  | 4.866667 | 57.9805  | 21.94055 | Stalled      | chr17:87832740-87848275   | 13.536  |
| <b>Itpa</b>          | 113 | 0  | 1.883424 | 288  | 4.8      | 12.5628  | 9.004405 | Stalled      | chr2:130491576-130507350  | 13.775  |
| <b>Cabyr</b>         | 113 | 0  | 1.883424 | 31   | 0.516667 | 0.122958 | 56.36751 | Stalled      | chr18:12897863-12913651   | 13.789  |
| <b>Mavs</b>          | 113 | 0  | 1.883424 | 150  | 2.5      | 7.86352  | 16.45734 | Stalled      | chr2:131057873-131073760  | 13.888  |
| <b>Mlec</b>          | 113 | 0  | 1.883424 | 568  | 9.466667 | 45.8634  | 8.559211 | Stalled      | chr5:115592989-115610185  | 15.197  |
| <b>Tmem111</b>       | 113 | 0  | 1.883424 | 242  | 4.033333 | 19.461   | 11.06211 | Stalled      | chr6:113464880-113483632  | 16.753  |
| <b>Acat2</b>         | 113 | 0  | 1.883424 | 179  | 2.983333 | 46.8502  | 34.44689 | Stalled      | chr17:13135907-13155591   | 17.685  |
| <b>Ddx17</b>         | 113 | 0  | 1.883424 | 683  | 11.38333 | 76.9931  | 11.62341 | Stalled      | chr15:79358125-79378989   | 18.865  |
| <b>Prr11</b>         | 113 | 0  | 1.883424 | 206  | 3.433333 | 5.00972  | 4.545778 | Stalled      | chr11:86902657-86924216   | 19.56   |
| <b>Cops3</b>         | 113 | 0  | 1.883424 | 554  | 9.233333 | 21.963   | 16.66363 | Stalled      | chr11:59631305-59655269   | 21.965  |
| <b>Ddx21</b>         | 113 | 0  | 1.883424 | 1173 | 19.55    | 50.896   | 9.133141 | Stalled      | chr10:62042994-62067046   | 22.053  |
| <b>Plscr1</b>        | 113 | 0  | 1.883424 | 247  | 4.116667 | 11.5698  | 12.97895 | Stalled      | chr9:92143031-92167399    | 22.369  |



|                      |     |    |          |      |          |          |          |              |                           |         |
|----------------------|-----|----|----------|------|----------|----------|----------|--------------|---------------------------|---------|
| <b>Rbm34</b>         | 113 | 0  | 1.883424 | 372  | 6.2      | 6.415    | 17.40253 | Stalled      | chr8:129471072-129496979  | 23.908  |
| <b>Os9</b>           | 113 | 0  | 1.883424 | 634  | 10.56667 | 79.5598  | 5.298923 | Stalled      | chr10:126531315-126560216 | 26.902  |
| <b>Smad7</b>         | 113 | 0  | 1.883424 | 659  | 10.98333 | 5.9869   | 10.1197  | Stalled      | chr18:75525018-75555588   | 28.571  |
| <b>Olfml2a</b>       | 113 | 0  | 1.883424 | 60   | 1        | 0.787387 | 3.781479 | Unclassified | chr2:38785499-38816105    | 28.607  |
| <b>Finc</b>          | 113 | 0  | 1.883424 | 65   | 1.083333 | 0.086652 | 0.598186 | Unclassified | chr6:29381152-29411888    | 28.737  |
| <b>Azin1</b>         | 113 | 0  | 1.883424 | 793  | 13.21667 | 13.9908  | 20.10105 | Stalled      | chr15:38417184-38451021   | 31.838  |
| <b>Tubgcp2</b>       | 113 | 0  | 1.883424 | 268  | 4.466667 | 8.83041  | 36.91102 | Stalled      | chr7:147181853-147224249  | 40.397  |
| <b>Rbms2</b>         | 113 | 0  | 1.883424 | 385  | 6.416667 | 4.47865  | 0        | Stalled      | chr10:127566525-127619353 | 50.829  |
| <b>Btbd10</b>        | 113 | 0  | 1.883424 | 130  | 2.166667 | 4.69684  | 132.9705 | Stalled      | chr7:120459157-120514853  | 53.697  |
| <b>Slc37a1</b>       | 113 | 0  | 1.883424 | 388  | 6.466667 | 1.87965  | 10.17602 | Stalled      | chr17:31430427-31487643   | 55.217  |
| <b>Ube2r2</b>        | 113 | 0  | 1.883424 | 614  | 10.23333 | 14.9298  | 11.60055 | Stalled      | chr4:41081053-41140403    | 57.351  |
| <b>Dhx35</b>         | 113 | 0  | 1.883424 | 693  | 11.55    | 4.60308  | 10.32505 | Stalled      | chr2:158618555-158683950  | 63.396  |
| <b>Fam126b</b>       | 113 | 0  | 1.883424 | 173  | 2.883333 | 0.627057 | 33.45089 | Stalled      | chr1:58579649-58645177    | 63.529  |
| <b>Ehd4</b>          | 113 | 0  | 1.883424 | 367  | 6.116667 | 10.4533  | 27.05788 | Stalled      | chr2:119915222-119982311  | 65.09   |
| <b>Fbxw4</b>         | 113 | 35 | 1.883424 | 379  | 6.316667 | 5.05054  | 43.11409 | Stalled      | chr19:45652746-45736683   | 81.938  |
| <b>Spred2</b>        | 113 | 0  | 1.883424 | 1129 | 18.81667 | 3.56017  | 10.53852 | Stalled      | chr11:19822444-19922600   | 98.157  |
| <b>Rab31</b>         | 113 | 0  | 1.883424 | 458  | 7.633333 | 2.72025  | 10.17489 | Stalled      | chr17:66001065-66124092   | 121.028 |
| <b>Adcy9</b>         | 113 | 0  | 1.883424 | 210  | 3.5      | 0.370866 | 3.073949 | Unclassified | chr16:4287544-4421587     | 132.044 |
| <b>Bmp6</b>          | 113 | 0  | 1.883424 | 361  | 6.016667 | 0.138242 | 1.190738 | Unclassified | chr13:38435584-38591597   | 154.014 |
| <b>Cpeb3</b>         | 113 | 0  | 1.883424 | 741  | 12.35    | 3.22853  | 22.57598 | Stalled      | chr19:37095780-37283783   | 186.004 |
| <b>Hist1h2bn</b>     | 112 | 44 | 1.866756 | 0    | 0        | 0        | 395      | Unclassified | chr13:21843991-21846372   | 0.382   |
| <b>Hist2h2ab</b>     | 112 | 0  | 1.866756 | 0    | 0        | 0        | 371      | Unclassified | chr3:96021838-96024231    | 0.394   |
| <b>Ovca2</b>         | 112 | 0  | 1.866756 | 68   | 1.133333 | 13.9727  | 5.905606 | Stalled      | chr11:74989444-74994310   | 2.867   |
| <b>Gpt</b>           | 112 | 0  | 1.866756 | 100  | 1.666667 | 3.38982  | 0.319106 | Stalled      | chr15:76525193-76530105   | 2.913   |
| <b>Comtd1</b>        | 112 | 0  | 1.866756 | 331  | 5.516667 | 5.58076  | 1.231643 | Elongating   | chr14:22665082-22670132   | 3.051   |
| <b>Bcs11</b>         | 112 | 0  | 1.866756 | 103  | 1.716667 | 7.06218  | 6.860827 | Stalled      | chr1:74632934-74639017    | 4.084   |
| <b>Ormdl2</b>        | 112 | 0  | 1.866756 | 52   | 0.866667 | 7.98973  | 14.27519 | Stalled      | chr10:128254512-128260687 | 4.176   |
| <b>Jrk</b>           | 112 | 0  | 1.866756 | 152  | 2.533333 | 1.50971  | 5.384551 | Stalled      | chr15:74534992-74541752   | 4.761   |
| <b>Cd24a</b>         | 112 | 0  | 1.866756 | 131  | 2.183333 | 47.9708  | 9.43373  | Stalled      | chr10:43296974-43304071   | 5.098   |
| <b>Chchd2</b>        | 112 | 0  | 1.866756 | 89   | 1.483333 | 54.8438  | 8.952285 | Stalled      | chr5:130357031-130365340  | 6.31    |
| <b>Gm11346</b>       | 112 | 0  | 1.866756 | 78   | 1.3      | 0.540891 | 2.967983 | Stalled      | chr13:24689995-24698636   | 6.642   |
| <b>Mknk2</b>         | 112 | 0  | 1.866756 | 479  | 7.983333 | 108.446  | 0.932469 | Elongating   | chr10:80128073-80136721   | 6.649   |
| <b>Mri1</b>          | 112 | 0  | 1.866756 | 97   | 1.616667 | 16.6855  | 9.623724 | Stalled      | chr8:86774475-86783223    | 6.749   |
| <b>1810031K17Rik</b> | 112 | 0  | 1.866756 | 66   | 1.1      | 16.6696  | 17.1458  | Stalled      | chr1:75131788-75140942    | 7.155   |
| <b>Slc30a3</b>       | 112 | 0  | 1.866756 | 14   | 0.233333 | 0.236984 | 1.257993 | Unclassified | chr5:31388478-31397900    | 7.423   |
| <b>Anapc13</b>       | 112 | 0  | 1.866756 | 83   | 1.383333 | 73.3384  | 44.03529 | Stalled      | chr9:102526625-102536573  | 7.949   |
| <b>Mrip150</b>       | 112 | 0  | 1.866756 | 79   | 1.316667 | 9.23201  | 12.12099 | Stalled      | chr4:49525468-49535955    | 8.488   |
| <b>Grpel1</b>        | 112 | 0  | 1.866756 | 297  | 4.95     | 13.8768  | 8.56991  | Stalled      | chr5:36805833-36816726    | 8.894   |
| <b>Klf6</b>          | 112 | 0  | 1.866756 | 180  | 3        | 4.91363  | 17.88155 | Stalled      | chr13:5858734-5869639     | 8.906   |
| <b>Fam101a</b>       | 112 | 0  | 1.866756 | 297  | 4.95     | 0.295164 | 0.238191 | Stalled      | chr5:125481844-125492917  | 9.074   |
| <b>Mesdc2</b>        | 112 | 0  | 1.866756 | 121  | 2.016667 | 7.72613  | 15.54823 | Stalled      | chr7:91038509-91050042    | 9.534   |
| <b>Sdf2</b>          | 112 | 0  | 1.866756 | 94   | 1.566667 | 39.9174  | 26.06112 | Stalled      | chr11:78057247-78068997   | 9.751   |
| <b>Pmm1</b>          | 112 | 0  | 1.866756 | 140  | 2.333333 | 34.0881  | 8.423526 | Stalled      | chr15:81781535-81793297   | 9.763   |
| <b>Zfp639</b>        | 112 | 0  | 1.866756 | 176  | 2.933333 | 7.65719  | 12.62255 | Stalled      | chr3:32407513-32419754    | 10.242  |
| <b>Zfp189</b>        | 112 | 0  | 1.866756 | 30   | 0.5      | 6.37022  | 33.21129 | Stalled      | chr4:49532088-49544417    | 10.33   |
| <b>Zbtb26</b>        | 112 | 0  | 1.866756 | 81   | 1.35     | 2.67591  | 29.22308 | Stalled      | chr2:37287687-37300641    | 10.955  |
| <b>Tcirg1</b>        | 112 | 0  | 1.866756 | 247  | 4.116667 | 25.7351  | 5.413501 | Stalled      | chr19:3896049-3909133     | 11.085  |
| <b>Pigv</b>          | 112 | 0  | 1.866756 | 157  | 2.616667 | 4.47014  | 23.10863 | Stalled      | chr4:133217340-133230562  | 11.223  |
| <b>Inpp5e</b>        | 112 | 0  | 1.866756 | 489  | 8.15     | 6.24156  | 3.504059 | Stalled      | chr2:26251768-26266708    | 12.941  |
| <b>Tenc1</b>         | 112 | 0  | 1.866756 | 133  | 2.216667 | 0.274929 | 0.256129 | Stalled      | chr15:101931418-101946832 | 13.415  |
| <b>Zfp457</b>        | 112 | 0  | 1.866756 | 17   | 0.283333 | 1.62622  | 38.93702 | Stalled      | chr13:67393386-67409348   | 13.963  |
| <b>C330006K01Rik</b> | 112 | 0  | 1.866756 | 176  | 2.933333 | 4.98525  | 15.03642 | Stalled      | chr5:142937884-142954669  | 14.786  |
| <b>Myl12b</b>        | 112 | 0  | 1.866756 | 195  | 3.25     | 27.4734  | 17.87804 | Stalled      | chr17:71323302-71341856   | 16.555  |
| <b>Loxl3</b>         | 112 | 0  | 1.866756 | 504  | 8.4      | 0.480249 | 0.498962 | Stalled      | chr6:82982217-83002558    | 18.342  |
| <b>Kif18b</b>        | 112 | 0  | 1.866756 | 450  | 7.5      | 13.9836  | 9.926762 | Stalled      | chr11:102766832-102788438 | 19.607  |
| <b>Mfsd11</b>        | 112 | 0  | 1.866756 | 100  | 1.666667 | 3.0415   | 39.6668  | Stalled      | chr11:116713328-116736951 | 21.624  |
| <b>Clns1a</b>        | 112 | 0  | 1.866756 | 236  | 3.933333 | 34.7467  | 19.93849 | Stalled      | chr7:104843200-104867389  | 22.19   |
| <b>Cadm4</b>         | 112 | 0  | 1.866756 | 113  | 1.883333 | 2.03991  | 2.718746 | Stalled      | chr7:25265041-25289552    | 22.512  |
| <b>Zcchc8</b>        | 112 | 0  | 1.866756 | 307  | 5.116667 | 12.0824  | 13.0301  | Stalled      | chr5:124148310-124173053  | 22.744  |
| <b>Dgke</b>          | 112 | 0  | 1.866756 | 333  | 5.55     | 5.11715  | 15.41664 | Stalled      | chr11:88898895-88924062   | 23.168  |
| <b>Atp6v0e</b>       | 112 | 0  | 1.866756 | 293  | 4.883333 | 48.8135  | 15.10515 | Stalled      | chr17:26811340-26836591   | 23.252  |
| <b>Rnf168</b>        | 112 | 0  | 1.866756 | 255  | 4.25     | 9.52599  | 24.71768 | Stalled      | chr16:32275546-32301525   | 23.98   |
| <b>Oas3</b>          | 112 | 0  | 1.866756 | 270  | 4.5      | 5.69881  | 5.056731 | Stalled      | chr5:121203106-121229668  | 24.563  |
| <b>Dync1li2</b>      | 112 | 0  | 1.866756 | 368  | 6.133333 | 8.58524  | 8.262185 | Stalled      | chr8:106941573-106968947  | 25.375  |
| <b>Exd1</b>          | 112 | 0  | 1.866756 | 52   | 0.866667 | 2.38514  | 59.10634 | Stalled      | chr2:119345139-119375363  | 28.225  |
| <b>Espn</b>          | 112 | 0  | 1.866756 | 133  | 2.216667 | 2.06027  | 0.74285  | Unclassified | chr4:151494984-151528316  | 31.333  |
| <b>Ahcy1</b>         | 112 | 0  | 1.866756 | 325  | 5.416667 | 18.2424  | 15.69647 | Stalled      | chr3:107466037-107501466  | 33.43   |
| <b>Cdk7</b>          | 112 | 0  | 1.866756 | 470  | 7.833333 | 2.73005  | 14.26938 | Stalled      | chr13:101466979-101502897 | 33.919  |
| <b>Ipo7</b>          | 112 | 0  | 1.866756 | 655  | 10.91667 | 21.2114  | 16.74249 | Stalled      | chr7:117159938-117198628  | 36.691  |
| <b>Supt6h</b>        | 112 | 0  | 1.866756 | 801  | 13.35    | 21.2374  | 13.34637 | Stalled      | chr11:78020250-78061205   | 38.956  |
| <b>1500003O03Rik</b> | 112 | 0  | 1.866756 | 250  | 4.166667 | 18.0888  | 22.06121 | Stalled      | chr2:119371442-119412758  | 39.317  |
| <b>Acot12</b>        | 112 | 0  | 1.866756 | 110  | 1.833333 | 0        | 0.851968 | Unclassified | chr13:91879125-91925753   | 44.629  |
| <b>Nup133</b>        | 112 | 0  | 1.866756 | 908  | 15.13333 | 9.06405  | 14.1838  | Stalled      | chr8:126421022-126475165  | 52.144  |
| <b>Cry1</b>          | 112 | 0  | 1.866756 | 222  | 3.7      | 7.59216  | 60.30302 | Stalled      | chr10:84594444-84649799   | 53.356  |
| <b>Sarnp</b>         | 112 | 0  | 1.866756 | 457  | 7.166667 | 18.841   | 26.36916 | Stalled      | chr10:128256826-128314693 | 55.868  |
| <b>Fam185a</b>       | 112 | 0  | 1.866756 | 296  | 4.933333 | 6.58189  | 11.17363 | Stalled      | chr5:20928720-20987942    | 57.223  |
| <b>Dtwd2</b>         | 112 | 0  | 1.866756 | 192  | 3.2      | 1.90385  | 83.79218 | Stalled      | chr18:49855798-49917255   | 59.458  |
| <b>Nfatc3</b>        | 112 | 0  | 1.866756 | 482  | 8.033333 | 9.4278   | 34.84534 | Stalled      | chr8:108581502-108654437  | 70.936  |
| <b>Creb1</b>         | 112 | 0  | 1.866756 | 604  | 10.06667 | 5.66353  | 50.01266 | Stalled      | chr1:64577377-64651122    | 71.746  |
| <b>Ubn2</b>          | 112 | 0  | 1.866756 | 277  | 4.616667 | 2.77052  | 69.31981 | Stalled      | chr6:38381924-38462763    | 78.84   |
| <b>Pde9a</b>         | 112 | 0  | 1.866756 | 153  | 2.55     | 0.223866 | 1.471879 | Unclassified | chr17:31521178-31613254   | 90.077  |
| <b>Lars2</b>         | 112 | 0  | 1.866756 | 447  | 7.45     | 81.6192  | 18.01054 | Stalled      | chr9:123274057-123371782  | 95.726  |
| <b>Rabgap1</b>       | 112 | 0  | 1.866756 | 838  | 13.96667 | 3.91624  | 32.31473 | Stalled      | chr2:37296804-37421957    | 123.154 |
| <b>Zfp277</b>        | 112 | 0  | 1.866756 | 368  | 6.133333 | 4.46184  | 17.72536 | Stalled      | chr12:41041632-41174377   | 130.746 |
| <b>Hist2h2ac</b>     | 111 | 0  | 1.850089 | 0    | 0        | 0        | 469      | Unclassified | chr3:96024377-96026767    | 0.391   |
| <b>Cox5b</b>         | 111 | 0  | 1.850089 | 21   | 0.35     | 141.719  | 7.58581  | Unclassified | chr1:36746331-36750233    | 1.903   |



|                      |     |   |          |      |          |          |          |              |                           |         |
|----------------------|-----|---|----------|------|----------|----------|----------|--------------|---------------------------|---------|
| <b>Hist3h2a</b>      | 111 | 0 | 1.850089 | 41   | 0.683333 | 14.306   | 10.73813 | Unclassified | chr11:58766186-58770176   | 1.991   |
| <b>Metrn</b>         | 111 | 0 | 1.850089 | 19   | 0.316667 | 19.8835  | 4.685485 | Stalled      | chr17:25931515-25935990   | 2.476   |
| <b>2310016M24Rik</b> | 111 | 0 | 1.850089 | 32   | 0.533333 | 36.7782  | 13.51313 | Stalled      | chr15:99554048-99558567   | 2.52    |
| <b>Sac3d1</b>        | 111 | 0 | 1.850089 | 38   | 0.633333 | 20.4425  | 12.48504 | Stalled      | chr19:6116003-6120586     | 2.584   |
| <b>Rpl30</b>         | 111 | 0 | 1.850089 | 102  | 1.7      | 0        | 6.679172 | Stalled      | chr15:34370262-34374980   | 2.719   |
| <b>Mmp23</b>         | 111 | 0 | 1.850089 | 132  | 2.2      | 0.312811 | 0.5307   | Stalled      | chr4:155024763-155029493  | 2.731   |
| <b>Gm15772</b>       | 111 | 0 | 1.850089 | 161  | 2.683333 | 0        | 4.110343 | Stalled      | chr11:68713090-68718036   | 2.947   |
| <b>Rpl26</b>         | 111 | 0 | 1.850089 | 162  | 2.7      | 625.203  | 4.108922 | Stalled      | chr11:68713067-68718036   | 2.97    |
| <b>Slamf9</b>        | 111 | 0 | 1.850089 | 1    | 0.016667 | 2.19389  | 5.377909 | Unclassified | chr1:174403490-174408540  | 3.051   |
| <b>Reep4</b>         | 111 | 0 | 1.850089 | 61   | 1.016667 | 25.1246  | 5.146831 | Stalled      | chr14:70943429-70948739   | 3.311   |
| <b>Tubb2b</b>        | 111 | 0 | 1.850089 | 2    | 0.033333 | 9.21694  | 21.60074 | Stalled      | chr13:34218876-34224223   | 3.348   |
| <b>Rap2b</b>         | 111 | 0 | 1.850089 | 32   | 0.533333 | 8.26018  | 14.7189  | Stalled      | chr3:61166428-61172625    | 4.198   |
| <b>Rnf39</b>         | 111 | 0 | 1.850089 | 133  | 2.216667 | 1.58604  | 0.115002 | Stalled      | chr17:37077995-37084931   | 4.937   |
| <b>Kbtbd4</b>        | 111 | 0 | 1.850089 | 170  | 2.833333 | 8.99648  | 6.858928 | Stalled      | chr2:90742942-90750717    | 5.776   |
| <b>Irgm1</b>         | 111 | 0 | 1.850089 | 203  | 3.383333 | 11.8455  | 5.41511  | Stalled      | chr11:48678750-48686848   | 6.099   |
| <b>Ict1</b>          | 111 | 0 | 1.850089 | 99   | 1.65     | 28.9793  | 11.57883 | Stalled      | chr11:115263079-115272227 | 7.149   |
| <b>BC026590</b>      | 111 | 0 | 1.850089 | 111  | 1.85     | 5.97438  | 15.36338 | Stalled      | chr4:56813200-56822477    | 7.278   |
| <b>Hapl4</b>         | 111 | 0 | 1.850089 | 19   | 0.316667 | 0.53043  | 0.750148 | Unclassified | chr8:72605427-72614761    | 7.335   |
| <b>Zbtb48</b>        | 111 | 0 | 1.850089 | 193  | 3.216667 | 5.73341  | 7.590609 | Stalled      | chr4:151393884-151403780  | 7.897   |
| <b>Miip</b>          | 111 | 0 | 1.850089 | 95   | 1.583333 | 16.1452  | 11.71278 | Stalled      | chr4:147234887-147244828  | 7.942   |
| <b>Calm3</b>         | 111 | 0 | 1.850089 | 342  | 5.7      | 142.703  | 4.006421 | Stalled      | chr7:17500727-17511381    | 8.655   |
| <b>Cam1</b>          | 111 | 0 | 1.850089 | 58   | 0.966667 | 13.6279  | 30.02245 | Stalled      | chr13:55722365-55733777   | 9.413   |
| <b>Ndufs3</b>        | 111 | 0 | 1.850089 | 165  | 2.75     | 35.9875  | 13.46709 | Stalled      | chr2:90734792-90746878    | 10.087  |
| <b>Dusp15</b>        | 111 | 0 | 1.850089 | 20   | 0.333333 | 0.189323 | 1.619566 | Unclassified | chr2:152766737-152779318  | 10.582  |
| <b>Echs1</b>         | 111 | 0 | 1.850089 | 48   | 0.8      | 9.72924  | 37.49516 | Stalled      | chr7:147291621-147304322  | 10.702  |
| <b>Cpsf4l</b>        | 111 | 0 | 1.850089 | 42   | 0.7      | 0.244088 | 1.026264 | Unclassified | chr11:11359485-113573331  | 11.847  |
| <b>Fam96a</b>        | 111 | 0 | 1.850089 | 142  | 2.366667 | 28.4861  | 10.96207 | Stalled      | chr9:65972417-65986775    | 12.359  |
| <b>Tceb1</b>         | 111 | 0 | 1.850089 | 220  | 3.666667 | 16.0086  | 17.36801 | Stalled      | chr1:16632845-16648946    | 14.102  |
| <b>Csdc2</b>         | 111 | 0 | 1.850089 | 144  | 2.4      | 0.473725 | 0.838704 | Stalled      | chr15:81765188-81781370   | 14.183  |
| <b>Mdh1</b>          | 111 | 0 | 1.850089 | 129  | 2.15     | 38.9215  | 11.73377 | Stalled      | chr11:21456694-21473937   | 15.244  |
| <b>Ddx23</b>         | 111 | 0 | 1.850089 | 474  | 7.9      | 33.5792  | 7.2835   | Stalled      | chr15:98475937-98495320   | 17.384  |
| <b>Kars</b>          | 111 | 0 | 1.850089 | 408  | 6.8      | 88.0784  | 7.741399 | Stalled      | chr8:114517339-114537205  | 17.867  |
| <b>Osbp17</b>        | 111 | 0 | 1.850089 | 279  | 4.65     | 6.85441  | 9.694643 | Stalled      | chr11:96910133-96930218   | 18.086  |
| <b>Anp32e</b>        | 111 | 0 | 1.850089 | 545  | 9.083333 | 84.5018  | 9.3858   | Stalled      | chr3:95731179-95751308    | 18.13   |
| <b>Aph1c</b>         | 111 | 0 | 1.850089 | 55   | 0.916667 | 0.827921 | 22.08696 | Stalled      | chr9:66662800-66684513    | 19.714  |
| <b>Sf3b2</b>         | 111 | 0 | 1.850089 | 504  | 8.4      | 78.6287  | 10.96222 | Stalled      | chr19:5273920-5297455     | 21.536  |
| <b>Kctd9</b>         | 111 | 0 | 1.850089 | 153  | 2.55     | 4.35742  | 24.6178  | Stalled      | chr14:68332154-68360367   | 26.214  |
| <b>Lsg1</b>          | 111 | 0 | 1.850089 | 620  | 10.33333 | 17.457   | 9.186249 | Stalled      | chr16:30561454-30589675   | 26.222  |
| <b>Tpm1</b>          | 111 | 0 | 1.850089 | 338  | 5.633333 | 16.0194  | 0.352316 | Stalled      | chr9:66870399-66899020    | 26.622  |
| <b>Mvp</b>           | 111 | 0 | 1.850089 | 410  | 6.833333 | 21.3718  | 8.998695 | Stalled      | chr7:134130374-134160108  | 27.735  |
| <b>Gpm</b>           | 111 | 0 | 1.850089 | 166  | 2.766667 | 1.80423  | 35.83568 | Stalled      | chr19:55144223-55175937   | 29.715  |
| <b>Alkbh3</b>        | 111 | 0 | 1.850089 | 341  | 5.683333 | 10.7017  | 16.35346 | Stalled      | chr2:93820790-93852887    | 30.098  |
| <b>Ncapg</b>         | 111 | 0 | 1.850089 | 271  | 4.516667 | 9.53865  | 36.1648  | Stalled      | chr5:46059163-46091786    | 30.624  |
| <b>Tgm4</b>          | 111 | 0 | 1.850089 | 89   | 1.483333 | 0.60214  | 0        | Unclassified | chr9:122941858-122976676  | 32.819  |
| <b>Fam120b</b>       | 111 | 0 | 1.850089 | 287  | 4.783333 | 7.48084  | 21.35243 | Stalled      | chr17:15531209-15570545   | 37.337  |
| <b>Cdca2</b>         | 111 | 0 | 1.850089 | 623  | 10.38333 | 14.5023  | 11.74485 | Stalled      | chr14:68294410-68335667   | 39.258  |
| <b>D19Bwg1357e</b>   | 111 | 0 | 1.850089 | 527  | 8.783333 | 12.796   | 28.01439 | Stalled      | chr9:27463191-27506310    | 41.12   |
| <b>D16H22S680E</b>   | 111 | 0 | 1.850089 | 353  | 5.883333 | 3.41552  | 12.14911 | Stalled      | chr16:18300919-18346025   | 43.107  |
| <b>Bus1b</b>         | 111 | 0 | 1.850089 | 394  | 6.566667 | 33.7324  | 6.507268 | Stalled      | chr2:118421946-118467328  | 43.383  |
| <b>Appbp2</b>        | 111 | 0 | 1.850089 | 486  | 8.1      | 11.0111  | 36.26956 | Stalled      | chr11:85004811-85050622   | 43.812  |
| <b>Rnf145</b>        | 111 | 0 | 1.850089 | 1018 | 16.96667 | 23.8211  | 8.395398 | Stalled      | chr11:44330465-44379020   | 46.556  |
| <b>Gabpb1</b>        | 111 | 0 | 1.850089 | 632  | 10.53333 | 10.2548  | 38.27204 | Stalled      | chr2:126454648-126503222  | 46.575  |
| <b>Ranbp2</b>        | 111 | 0 | 1.850089 | 619  | 10.31667 | 12.5503  | 28.67448 | Stalled      | chr10:57907599-57956902   | 47.304  |
| <b>Mink1</b>         | 111 | 0 | 1.850089 | 451  | 7.516667 | 12.616   | 12.20679 | Stalled      | chr11:70374382-70427984   | 51.603  |
| <b>Ikbkap</b>        | 111 | 0 | 1.850089 | 634  | 10.56667 | 6.13616  | 21.62087 | Stalled      | chr4:56762551-56817203    | 52.653  |
| <b>Colq</b>          | 111 | 0 | 1.850089 | 247  | 4.116667 | 0.705237 | 1.064951 | Unclassified | chr14:32336269-32392569   | 54.301  |
| <b>Rspry1</b>        | 111 | 0 | 1.850089 | 207  | 3.45     | 7.7496   | 48.15374 | Stalled      | chr8:97123840-97184176    | 58.337  |
| <b>2610028A01Rik</b> | 111 | 0 | 1.850089 | 811  | 13.51667 | 15.2528  | 15.89049 | Stalled      | chr14:64477148-64538696   | 59.549  |
| <b>Zc3h13</b>        | 111 | 0 | 1.850089 | 381  | 6.35     | 9.68772  | 31       | Stalled      | chr14:75682179-75744233   | 60.055  |
| <b>Rffl</b>          | 111 | 0 | 1.850089 | 794  | 13.23333 | 3.54021  | 12.11488 | Stalled      | chr11:82617321-82686712   | 67.392  |
| <b>Arid4a</b>        | 111 | 0 | 1.850089 | 464  | 7.733333 | 5.64034  | 44.17957 | Stalled      | chr12:72114953-72200338   | 83.386  |
| <b>Vcan</b>          | 111 | 0 | 1.850089 | 99   | 1.65     | 0.364876 | 4.654543 | Unclassified | chr13:89794914-89884117   | 87.204  |
| <b>Ints9</b>         | 111 | 0 | 1.850089 | 664  | 11.06667 | 11.5835  | 10.37869 | Stalled      | chr14:65566881-65658663   | 89.783  |
| <b>Abcc5</b>         | 111 | 0 | 1.850089 | 209  | 3.483333 | 3.89164  | 41.28857 | Stalled      | chr16:20331376-20428467   | 95.092  |
| <b>Ccdc6</b>         | 111 | 0 | 1.850089 | 1585 | 26.41667 | 9.23266  | 7.640069 | Stalled      | chr10:69557868-69655948   | 96.081  |
| <b>Hmbox1</b>        | 111 | 0 | 1.850089 | 508  | 8.466667 | 5.55425  | 16.16232 | Stalled      | chr14:65441054-65570684   | 127.631 |
| <b>Ank</b>           | 111 | 0 | 1.850089 | 1438 | 23.96667 | 1.06273  | 0.243859 | Stalled      | chr15:27394431-27524662   | 128.232 |
| <b>Cbara1</b>        | 111 | 0 | 1.850089 | 800  | 13.33333 | 9.90078  | 25.06364 | Stalled      | chr10:59163382-59326870   | 161.489 |
| <b>1110051M20Rik</b> | 111 | 0 | 1.850089 | 534  | 8.9      | 1.49563  | 6.397442 | Stalled      | chr2:91117984-91286799    | 166.816 |
| <b>Rapgef6</b>       | 111 | 0 | 1.850089 | 1538 | 25.63333 | 6.43768  | 42.0825  | Stalled      | chr11:54334348-54512787   | 176.44  |
| <b>Ap3b1</b>         | 111 | 0 | 1.850089 | 1759 | 29.31667 | 15.8447  | 23.93947 | Stalled      | chr13:95126914-95336271   | 207.358 |
| <b>Mylk</b>          | 111 | 0 | 1.850089 | 352  | 5.866667 | 0.148529 | 0.761623 | Unclassified | chr16:34783035-35002520   | 217.486 |
| <b>Chchd3</b>        | 111 | 0 | 1.850089 | 1572 | 26.2     | 36.2771  | 21.33759 | Stalled      | chr6:32742226-33012152    | 267.927 |
| <b>AV249152</b>      | 111 | 0 | 1.850089 | 285  | 4.75     | 1.16464  | 40.51548 | Stalled      | chr11:21470283-21798689   | 326.407 |
| <b>Ier3</b>          | 110 | 0 | 1.833421 | 9    | 0.15     | 11.52    | 2.891304 | Unclassified | chr17:35956657-35959856   | 1.2     |
| <b>Atp6v1f</b>       | 110 | 0 | 1.833421 | 45   | 0.75     | 103.505  | 6.693374 | Stalled      | chr6:29415782-29420509    | 2.728   |
| <b>Psmc3ip</b>       | 110 | 0 | 1.833421 | 55   | 0.916667 | 12.4507  | 11.84872 | Stalled      | chr11:100953470-100958715 | 3.246   |
| <b>Smpd1</b>         | 110 | 0 | 1.833421 | 27   | 0.45     | 11.6805  | 11.80519 | Stalled      | chr7:112700873-112706902  | 4.03    |
| <b>2210021J22Rik</b> | 110 | 0 | 1.833421 | 43   | 0.716667 | 7.79183  | 30.94733 | Stalled      | chr15:85637401-85644127   | 4.727   |
| <b>Wdr74</b>         | 110 | 0 | 1.833421 | 108  | 1.8      | 33.2721  | 10.46797 | Stalled      | chr19:8808328-8815114     | 4.787   |
| <b>Wdr24</b>         | 110 | 0 | 1.833421 | 111  | 1.85     | 12.9994  | 4.671865 | Stalled      | chr17:25958571-25965675   | 5.105   |
| <b>Ndufv1</b>        | 110 | 0 | 1.833421 | 82   | 1.366667 | 40.0245  | 11.60509 | Stalled      | chr19:4007504-4014725     | 5.222   |
| <b>Srp19</b>         | 110 | 0 | 1.833421 | 52   | 0.866667 | 44.2165  | 36.544   | Stalled      | chr18:34488798-34496253   | 5.456   |
| <b>Usp21</b>         | 110 | 0 | 1.833421 | 124  | 2.066667 | 8.3975   | 8.695523 | Stalled      | chr1:173212085-173220092  | 6.008   |
| <b>Psmc3</b>         | 110 | 0 | 1.833421 | 252  | 4.2      | 57.9922  | 11.57559 | Stalled      | chr11:101175564-101184844 | 7.281   |
| <b>Mrpl17</b>        | 110 | 0 | 1.833421 | 264  | 4.4      | 8.61789  | 6.346502 | Stalled      | chr7:112952295-112961601  | 7.307   |

|                      |     |    |          |      |          |          |          |              |                           |         |
|----------------------|-----|----|----------|------|----------|----------|----------|--------------|---------------------------|---------|
| <b>Kifc2</b>         | 110 | 0  | 1.833421 | 33   | 0.55     | 1.21075  | 0.828804 | Unclassified | chr15:76489070-76498626   | 7.557   |
| <b>Atp5j2</b>        | 110 | 0  | 1.833421 | 282  | 4.7      | 211.707  | 5.865415 | Stalled      | chr5:145944574-145954461  | 7.888   |
| <b>Zfyve19</b>       | 110 | 0  | 1.833421 | 67   | 1.116667 | 13.2213  | 23.77189 | Stalled      | chr2:119032455-119042786  | 8.332   |
| <b>Fdps</b>          | 110 | 0  | 1.833421 | 330  | 5.5      | 75.4642  | 3.686491 | Stalled      | chr3:88897509-88907867    | 8.359   |
| <b>Wbp2</b>          | 110 | 0  | 1.833421 | 158  | 2.633333 | 21.875   | 3.039572 | Stalled      | chr11:115939886-115950278 | 8.393   |
| <b>Nkx2-2</b>        | 110 | 0  | 1.833421 | 13   | 0.216667 | 0.362051 | 0        | Unclassified | chr2:147003281-147014138  | 8.858   |
| <b>Fdxr</b>          | 110 | 0  | 1.833421 | 81   | 1.35     | 9.50483  | 22.95912 | Stalled      | chr11:115129338-115140283 | 8.946   |
| <b>Kcnk6</b>         | 110 | 0  | 1.833421 | 58   | 0.966667 | 3.03177  | 4.258832 | Stalled      | chr7:30006946-30019541    | 10.596  |
| <b>Surf6</b>         | 110 | 0  | 1.833421 | 416  | 6.933333 | 23.9772  | 6.257932 | Stalled      | chr2:26746291-26760333    | 12.043  |
| <b>Bysl</b>          | 110 | 0  | 1.833421 | 519  | 8.65     | 14.6575  | 5.074445 | Stalled      | chr17:47736279-47750441   | 12.163  |
| <b>Stxbp2</b>        | 110 | 0  | 1.833421 | 272  | 4.533333 | 46.2303  | 7.900813 | Stalled      | chr8:3629159-3643644      | 12.486  |
| <b>Nob1</b>          | 110 | 0  | 1.833421 | 390  | 6.5      | 32.0553  | 6.127149 | Stalled      | chr8:109936388-109950938  | 12.551  |
| <b>Med20</b>         | 110 | 0  | 1.833421 | 248  | 4.133333 | 9.75569  | 10.37576 | Stalled      | chr17:47746544-47761367   | 12.824  |
| <b>Tlr4</b>          | 110 | 0  | 1.833421 | 53   | 0.883333 | 1.46254  | 17.33054 | Stalled      | chr4:66486844-66503830    | 14.987  |
| <b>Idua</b>          | 110 | 0  | 1.833421 | 201  | 3.35     | 5.5863   | 13.75268 | Stalled      | chr5:109096124-109113577  | 15.454  |
| <b>Nup50</b>         | 110 | 0  | 1.833421 | 564  | 9.4      | 19.8994  | 13.61945 | Stalled      | chr15:84751857-84773393   | 19.537  |
| <b>Cpsf31</b>        | 110 | 0  | 1.833421 | 368  | 6.133333 | 16.3819  | 16.64179 | Stalled      | chr4:155241675-155263212  | 19.538  |
| <b>Rdh13</b>         | 110 | 0  | 1.833421 | 179  | 2.983333 | 5.69123  | 6.619322 | Stalled      | chr7:4377266-4399259      | 19.994  |
| <b>Safb2</b>         | 110 | 0  | 1.833421 | 1543 | 25.71667 | 55.4782  | 5.571186 | Stalled      | chr17:56702364-56726006   | 21.643  |
| <b>Traf6</b>         | 110 | 0  | 1.833421 | 285  | 4.75     | 4.77809  | 11.73276 | Stalled      | chr2:101516596-101541131  | 22.536  |
| <b>Ccdc101</b>       | 110 | 0  | 1.833421 | 180  | 3        | 12.9126  | 49.94271 | Stalled      | chr7:133790822-133816292  | 23.471  |
| <b>Slc39a6</b>       | 110 | 0  | 1.833421 | 351  | 5.85     | 10.8721  | 19.56801 | Stalled      | chr18:24738381-24764318   | 23.938  |
| <b>Cyp51</b>         | 110 | 0  | 1.833421 | 515  | 8.583333 | 49.9517  | 17.20375 | Stalled      | chr5:4080673-4106697      | 24.025  |
| <b>Copb2</b>         | 110 | 0  | 1.833421 | 343  | 5.716667 | 29.2804  | 17.7355  | Stalled      | chr9:98462149-98488794    | 24.646  |
| <b>Anxa7</b>         | 110 | 0  | 1.833421 | 250  | 4.166667 | 16.4169  | 9.763205 | Stalled      | chr14:21274482-21301355   | 24.874  |
| <b>Sarm1</b>         | 110 | 0  | 1.833421 | 44   | 0.733333 | 1.24586  | 37.12386 | Stalled      | chr11:78285832-78313256   | 25.425  |
| <b>Sgms2</b>         | 110 | 0  | 1.833421 | 48   | 0.8      | 0.075286 | 0        | Unclassified | chr3:131021905-131049841  | 25.937  |
| <b>9130404D08Rik</b> | 110 | 0  | 1.833421 | 479  | 7.983333 | 9.7487   | 15.68413 | Stalled      | chr8:72540021-72568633    | 26.613  |
| <b>Gtf2h1</b>        | 110 | 0  | 1.833421 | 467  | 7.783333 | 11.8033  | 23.80257 | Stalled      | chr7:54049463-54079170    | 27.708  |
| <b>Mcm6</b>          | 110 | 0  | 1.833421 | 1021 | 17.01667 | 47.6015  | 9.452184 | Stalled      | chr1:130228167-130258233  | 28.067  |
| <b>Rbbp4</b>         | 110 | 0  | 1.833421 | 471  | 7.85     | 32.0642  | 19.3208  | Stalled      | chr4:128984343-129014614  | 28.272  |
| <b>Sf4</b>           | 110 | 0  | 1.833421 | 410  | 6.833333 | 18.2039  | 19.59025 | Stalled      | chr8:72564711-72595852    | 29.142  |
| <b>Slc31a1</b>       | 110 | 0  | 1.833421 | 338  | 5.633333 | 14.019   | 26.8773  | Stalled      | chr4:62019734-62052802    | 31.069  |
| <b>2310003L22Rik</b> | 110 | 0  | 1.833421 | 130  | 2.166667 | 4.6719   | 45.60276 | Stalled      | chr2:139994381-140030988  | 34.608  |
| <b>Elp2</b>          | 110 | 0  | 1.833421 | 313  | 5.216667 | 15.588   | 29.68476 | Stalled      | chr18:24760461-24797331   | 34.871  |
| <b>Hps5</b>          | 110 | 0  | 1.833421 | 158  | 2.633333 | 5.43326  | 77.09156 | Stalled      | chr7:54015835-54053251    | 35.417  |
| <b>Dhx29</b>         | 110 | 0  | 1.833421 | 215  | 3.583333 | 6.1915   | 27.20525 | Stalled      | chr13:113716000-113759395 | 41.396  |
| <b>Atp2a2</b>        | 110 | 0  | 1.833421 | 1943 | 32.38333 | 47.2961  | 10.59398 | Stalled      | chr5:122903521-122954234  | 48.714  |
| <b>Urgcp</b>         | 110 | 0  | 1.833421 | 666  | 11.1     | 6.97507  | 33.92385 | Stalled      | chr11:5613419-5664379     | 48.961  |
| <b>Esf1</b>          | 110 | 0  | 1.833421 | 285  | 4.75     | 6.85028  | 32.80474 | Stalled      | chr2:139945616-139998294  | 50.679  |
| <b>Dcps</b>          | 110 | 0  | 1.833421 | 276  | 4.6      | 34.5481  | 23.53946 | Stalled      | chr9:34931998-34985572    | 51.575  |
| <b>Skiv2l2</b>       | 110 | 0  | 1.833421 | 867  | 14.45    | 16.7134  | 12.91571 | Stalled      | chr13:113657987-113719588 | 59.602  |
| <b>Farsb</b>         | 110 | 0  | 1.833421 | 927  | 15.45    | 17.9227  | 19.22161 | Stalled      | chr1:78421410-78487421    | 64.012  |
| <b>Vmn2r29</b>       | 110 | 36 | 1.833421 | 9    | 0.15     | 0.342136 | 34.21113 | Stalled      | chr7:7165706-7233000      | 65.295  |
| <b>Pet112l</b>       | 110 | 0  | 1.833421 | 270  | 4.5      | 6.55908  | 38.38339 | Stalled      | chr3:85376050-85458392    | 80.343  |
| <b>Nol10</b>         | 110 | 0  | 1.833421 | 1138 | 18.96667 | 9.43266  | 17.5283  | Stalled      | chr12:17353298-17436901   | 81.604  |
| <b>Fntb</b>          | 110 | 0  | 1.833421 | 407  | 6.783333 | 7.82219  | 29.11924 | Stalled      | chr12:77936453-78022399   | 83.947  |
| <b>Gng2</b>          | 110 | 0  | 1.833421 | 751  | 12.51667 | 5.46785  | 10.06963 | Stalled      | chr14:20691780-20798471   | 104.692 |
| <b>Farp2</b>         | 110 | 0  | 1.833421 | 324  | 5.4      | 0.622091 | 37.72663 | Stalled      | chr1:95406680-95518551    | 109.872 |
| <b>Map2k6</b>        | 110 | 0  | 1.833421 | 460  | 7.666667 | 6.89095  | 5.937941 | Stalled      | chr11:110258435-110374951 | 114.517 |
| <b>Faf1</b>          | 110 | 0  | 1.833421 | 1144 | 19.06667 | 5.46199  | 96.6905  | Stalled      | chr4:109347231-109636565  | 287.335 |
| <b>Dlgap1</b>        | 110 | 0  | 1.833421 | 478  | 7.966667 | 0.325334 | 0.452853 | Unclassified | chr17:70772131-71170753   | 396.623 |
| <b>Rpl41</b>         | 109 | 0  | 1.816754 | 13   | 0.216667 | 118.61   | 2.196018 | Unclassified | chr10:127985165-127988224 | 1.06    |
| <b>Gpr172b</b>       | 109 | 0  | 1.816754 | 31   | 0.516667 | 9.34089  | 19.91859 | Stalled      | chr15:76367372-76372560   | 3.189   |
| <b>Tprgl</b>         | 109 | 0  | 1.816754 | 67   | 1.116667 | 19.1438  | 3.401734 | Stalled      | chr4:153531594-153536793  | 3.2     |
| <b>Dph2</b>          | 109 | 0  | 1.816754 | 54   | 0.9      | 11.372   | 3.562152 | Stalled      | chr4:117561247-117566608  | 3.362   |
| <b>Mrp155</b>        | 109 | 0  | 1.816754 | 40   | 0.666667 | 17.5932  | 10.82908 | Stalled      | chr11:59014018-59019504   | 3.487   |
| <b>Arrdc2</b>        | 109 | 0  | 1.816754 | 98   | 1.633333 | 9.46004  | 11.14884 | Stalled      | chr8:73359036-73365619    | 4.584   |
| <b>Ifit20</b>        | 109 | 0  | 1.816754 | 139  | 2.316667 | 33.1478  | 9.092331 | Stalled      | chr11:78347937-78354975   | 5.039   |
| <b>Med10</b>         | 109 | 0  | 1.816754 | 114  | 1.9      | 32.6751  | 5.729478 | Stalled      | chr13:69946759-69954972   | 6.214   |
| <b>Polr2j</b>        | 109 | 0  | 1.816754 | 221  | 3.683333 | 59.3278  | 8.505458 | Stalled      | chr5:136590560-136598817  | 6.258   |
| <b>Tnfrsf17</b>      | 109 | 0  | 1.816754 | 41   | 0.683333 | 1.04172  | 0.113724 | Unclassified | chr16:11311901-11320161   | 6.261   |
| <b>Atp5g2</b>        | 109 | 0  | 1.816754 | 405  | 6.75     | 35.7098  | 6.602922 | Stalled      | chr15:102493298-102503478 | 8.181   |
| <b>Mrps36</b>        | 109 | 0  | 1.816754 | 48   | 0.8      | 8.38171  | 24.95431 | Stalled      | chr13:101505915-101516590 | 8.676   |
| <b>Esrra</b>         | 109 | 0  | 1.816754 | 569  | 9.483333 | 12.8092  | 2.836934 | Stalled      | chr19:6985466-6998298     | 10.833  |
| <b>Gorasp1</b>       | 109 | 0  | 1.816754 | 482  | 8.033333 | 10.7227  | 5.588321 | Stalled      | chr9:119834790-119848676  | 11.887  |
| <b>Sumo2</b>         | 109 | 0  | 1.816754 | 418  | 6.966667 | 0        | 6.313431 | Stalled      | chr11:115384422-115399544 | 13.123  |
| <b>Plaur</b>         | 109 | 0  | 1.816754 | 83   | 1.383333 | 0.963979 | 6.098296 | Stalled      | chr7:25245518-25260892    | 13.375  |
| <b>Tnfaip1</b>       | 109 | 0  | 1.816754 | 319  | 5.316667 | 6.66991  | 12.28421 | Stalled      | chr11:78336351-78351762   | 13.412  |
| <b>Serp1nb6b</b>     | 109 | 0  | 1.816754 | 181  | 3.016667 | 10.7433  | 6.53724  | Stalled      | chr13:33055381-33070906   | 13.526  |
| <b>Rbm45</b>         | 109 | 0  | 1.816754 | 160  | 2.666667 | 19.0908  | 14.0588  | Stalled      | chr2:76206040-76221824    | 13.785  |
| <b>Txn2</b>          | 109 | 0  | 1.816754 | 316  | 5.266667 | 49.1984  | 14.12776 | Stalled      | chr15:77745480-77761424   | 13.945  |
| <b>Becn1</b>         | 109 | 0  | 1.816754 | 269  | 4.483333 | 42.3866  | 8.29909  | Stalled      | chr11:101149580-101165581 | 14.002  |
| <b>Txlna</b>         | 109 | 0  | 1.816754 | 637  | 10.61667 | 28.0082  | 9.566513 | Stalled      | chr4:129303326-129319884  | 14.559  |
| <b>Catsper2</b>      | 109 | 0  | 1.816754 | 66   | 1.1      | 4.00045  | 115.5132 | Stalled      | chr2:121220091-121241528  | 19.438  |
| <b>Dhx33</b>         | 109 | 0  | 1.816754 | 254  | 4.233333 | 6.07971  | 9.90704  | Stalled      | chr11:70797592-70819934   | 20.343  |
| <b>Ly96</b>          | 109 | 0  | 1.816754 | 131  | 2.183333 | 9.83723  | 24.2637  | Stalled      | chr1:16676536-16699686    | 21.151  |
| <b>Denr</b>          | 109 | 0  | 1.816754 | 379  | 6.316667 | 25.0757  | 12.24611 | Stalled      | chr5:124355283-124378841  | 21.559  |
| <b>Fbp1</b>          | 109 | 0  | 1.816754 | 46   | 0.766667 | 0.429049 | 1.31328  | Unclassified | chr13:62966112-62991596   | 23.485  |
| <b>Fam105a</b>       | 109 | 0  | 1.816754 | 209  | 3.483333 | 2.27693  | 11.94722 | Stalled      | chr15:27586024-27613253   | 25.23   |
| <b>Stat5a</b>        | 109 | 0  | 1.816754 | 688  | 11.46667 | 22.1433  | 0.626726 | Stalled      | chr11:100718664-100746482 | 25.819  |
| <b>Gpr161</b>        | 109 | 0  | 1.816754 | 34   | 0.566667 | 0.065962 | 0.424577 | Unclassified | chr1:167223896-167251982  | 26.087  |
| <b>Saps1</b>         | 109 | 0  | 1.816754 | 774  | 12.9     | 61.1705  | 13.1879  | Stalled      | chr7:4583096-4612552      | 27.457  |
| <b>Sec31b</b>        | 109 | 0  | 1.816754 | 55   | 0.916667 | 0.274244 | 6.056893 | Stalled      | chr19:44591446-44622338   | 28.893  |
| <b>1190005F20Rik</b> | 109 | 0  | 1.816754 | 140  | 2.333333 | 12.9536  | 58.07571 | Stalled      | chr1:153273777-153305312  | 29.536  |
| <b>Ttc21a</b>        | 109 | 0  | 1.816754 | 321  | 5.35     | 1.27761  | 20.50462 | Stalled      | chr9:119844723-119878911  | 30.189  |

|               |     |    |          |      |          |          |          |              |                           |         |
|---------------|-----|----|----------|------|----------|----------|----------|--------------|---------------------------|---------|
| Ccpg1         | 109 | 0  | 1.816754 | 77   | 1.283333 | 7.44766  | 17.42931 | Stalled      | chr9:72831357-72863806    | 30.45   |
| Dpp9          | 109 | 0  | 1.816754 | 681  | 11.35    | 15.4513  | 9.947141 | Stalled      | chr17:56326104-56360312   | 32.209  |
| Ifnar2        | 109 | 0  | 1.816754 | 502  | 8.366667 | 18.6086  | 14.00211 | Stalled      | chr16:91371027-91405832   | 32.806  |
| Pon2          | 109 | 0  | 1.816754 | 331  | 5.516667 | 12.1049  | 14.94612 | Stalled      | chr6:5214623-5250373      | 33.751  |
| Sdc3          | 109 | 0  | 1.816754 | 198  | 3.3      | 2.71396  | 2.272819 | Stalled      | chr4:130346451-130382233  | 33.783  |
| Dhx8          | 109 | 0  | 1.816754 | 425  | 7.083333 | 9.92645  | 12.09612 | Stalled      | chr11:101592269-101628671 | 34.403  |
| Parp14        | 109 | 0  | 1.816754 | 1180 | 19.66667 | 19.9086  | 7.48576  | Stalled      | chr16:35832963-35873468   | 38.506  |
| Jdp2          | 109 | 0  | 1.816754 | 604  | 10.06667 | 7.18302  | 6.133055 | Stalled      | chr12:86938365-86980828   | 40.464  |
| Med23         | 109 | 0  | 1.816754 | 383  | 6.383333 | 4.51665  | 10.09775 | Stalled      | chr10:24587791-24633335   | 43.545  |
| Immt          | 109 | 0  | 1.816754 | 369  | 6.15     | 24.9326  | 55.7641  | Stalled      | chr6:71779324-71825280    | 43.937  |
| Morc3         | 109 | 0  | 1.816754 | 678  | 11.3     | 6.48391  | 18.35005 | Stalled      | chr16:93830365-93876317   | 43.953  |
| Zfp697        | 109 | 0  | 1.816754 | 180  | 3        | 1.83147  | 0.636451 | Unclassified | chr3:98184403-98235872    | 49.47   |
| Mttr10        | 109 | 0  | 1.816754 | 204  | 3.4      | 0.984719 | 25.44429 | Stalled      | chr7:71430555-71485692    | 53.138  |
| Ints8         | 109 | 0  | 1.816754 | 486  | 8.1      | 6.71759  | 24.14136 | Stalled      | chr4:11126304-11183406    | 55.103  |
| Luc712        | 109 | 0  | 1.816754 | 1165 | 19.41667 | 39.8121  | 25.61958 | Stalled      | chr6:38499443-38559469    | 58.027  |
| Cacna1g       | 109 | 0  | 1.816754 | 96   | 1.6      | 0.102605 | 2.414521 | Unclassified | chr11:94269704-94337351   | 65.648  |
| Mccc2         | 109 | 0  | 1.816754 | 226  | 3.766667 | 6.53991  | 50.92115 | Stalled      | chr13:100718486-100787594 | 67.109  |
| Tnpo3         | 109 | 0  | 1.816754 | 651  | 10.85    | 15.3828  | 33.75983 | Stalled      | chr6:29490826-29561607    | 68.782  |
| Prelid2       | 109 | 0  | 1.816754 | 101  | 1.683333 | 12.3888  | 8.065527 | Stalled      | chr18:42035349-42112848   | 75.5    |
| Pkd112        | 109 | 0  | 1.816754 | 161  | 2.683333 | 0.048593 | 0.695147 | Unclassified | chr8:119519579-119608349  | 86.771  |
| Smarca4       | 109 | 0  | 1.816754 | 1864 | 31.06667 | 35.1297  | 12.95077 | Stalled      | chr9:21418612-21507811    | 87.2    |
| Lrp5          | 109 | 0  | 1.816754 | 283  | 4.716667 | 0.671475 | 1.837664 | Unclassified | chr19:3584824-3688564     | 101.741 |
| Itih5         | 109 | 0  | 1.816754 | 110  | 1.833333 | 0.318289 | 4.811027 | Unclassified | chr2:10073169-10178156    | 102.988 |
| Cdyl          | 109 | 0  | 1.816754 | 1296 | 21.6     | 3.93168  | 15.67797 | Stalled      | chr13:35831270-35965933   | 132.664 |
| AU040829      | 109 | 0  | 1.816754 | 266  | 4.433333 | 0.047853 | 1.126426 | Unclassified | chr11:64815540-64978463   | 160.924 |
| Tll11         | 109 | 0  | 1.816754 | 502  | 8.366667 | 1.02417  | 33.98063 | Stalled      | chr2:35606760-35837144    | 228.385 |
| BC057079      | 109 | 0  | 1.816754 | 2055 | 34.25    | 5.41685  | 39.91545 | Stalled      | chr4:87738533-88056915    | 316.383 |
| Bmyc          | 108 | 0  | 1.800086 | 0    | 0        | 36.9635  | 140      | Unclassified | chr2:25560398-25563239    | 0.842   |
| 2810422O2ORik | 108 | 0  | 1.800086 | 3    | 0.05     | 5.4569   | 59.86047 | Stalled      | chr1:165923075-165927374  | 2.3     |
| Snrpd2        | 108 | 0  | 1.800086 | 40   | 0.666667 | 143.893  | 6.587252 | Stalled      | chr7:19733186-19738075    | 2.89    |
| Atpif1        | 108 | 0  | 1.800086 | 45   | 0.75     | 94.4143  | 9.433321 | Stalled      | chr4:132086469-132091574  | 3.106   |
| Rps19bp1      | 108 | 0  | 1.800086 | 155  | 2.583333 | 22.0777  | 2.9384   | Stalled      | chr15:80091043-80096736   | 3.694   |
| Ggn           | 108 | 0  | 1.800086 | 471  | 7.85     | 1.60372  | 0.235844 | Stalled      | chr7:29953228-29958952    | 3.725   |
| Sic39a5       | 108 | 0  | 1.800086 | 150  | 2.5      | 0.077424 | 0.695435 | Stalled      | chr10:127832989-127840280 | 5.292   |
| Tubg1         | 108 | 0  | 1.800086 | 60   | 1        | 23.4827  | 26.89968 | Stalled      | chr11:100979444-100987733 | 6.29    |
| Ppib          | 108 | 0  | 1.800086 | 190  | 3.166667 | 231.957  | 10.25547 | Stalled      | chr9:65905975-65914436    | 6.462   |
| Zfp46         | 108 | 0  | 1.800086 | 42   | 0.7      | 5.27688  | 20.39642 | Stalled      | chr4:135839983-135849857  | 7.875   |
| Hnrnph1       | 108 | 0  | 1.800086 | 284  | 4.733333 | 93.0934  | 13.65134 | Stalled      | chr11:50189220-50200030   | 8.811   |
| Dos           | 108 | 0  | 1.800086 | 263  | 4.383333 | 3.76615  | 0.907911 | Elongating   | chr10:79593178-79604112   | 8.935   |
| Zfp259        | 108 | 0  | 1.800086 | 249  | 4.15     | 17.1103  | 7.261589 | Stalled      | chr9:46079146-46090725    | 9.58    |
| Nit2          | 108 | 0  | 1.800086 | 214  | 3.566667 | 6.92557  | 7.435398 | Stalled      | chr16:57156777-57169445   | 10.669  |
| Hscb          | 108 | 0  | 1.800086 | 46   | 0.766667 | 33.7093  | 38.86458 | Stalled      | chr5:111258088-111270796  | 10.709  |
| Impdh1        | 108 | 0  | 1.800086 | 193  | 3.216667 | 16.6781  | 11.74537 | Stalled      | chr6:29150439-29164271    | 11.833  |
| Msi1          | 108 | 0  | 1.800086 | 224  | 3.733333 | 19.0856  | 6.888503 | Stalled      | chr11:98655082-98669173   | 12.092  |
| Aco8          | 108 | 0  | 1.800086 | 178  | 2.966667 | 14.9411  | 26.50472 | Stalled      | chr2:164618268-164632381  | 12.114  |
| Adam8         | 108 | 0  | 1.800086 | 43   | 0.716667 | 1.22057  | 3.162721 | Unclassified | chr7:147164839-147180387  | 13.549  |
| Kctd20        | 108 | 0  | 1.800086 | 542  | 9.033333 | 18.7445  | 1.703883 | Elongating   | chr17:29088160-29104882   | 14.723  |
| Skp1a         | 108 | 0  | 1.800086 | 129  | 2.15     | 17.9378  | 32.60869 | Stalled      | chr11:52043496-52060360   | 14.865  |
| Zwint         | 108 | 0  | 1.800086 | 283  | 4.716667 | 11.093   | 8.00353  | Stalled      | chr10:72115642-72132537   | 14.896  |
| Mphosph10     | 108 | 0  | 1.800086 | 253  | 4.216667 | 16.2718  | 13.34109 | Stalled      | chr7:71521426-71539122    | 15.697  |
| Pmf1          | 108 | 0  | 1.800086 | 414  | 6.9      | 42.3694  | 15.5224  | Stalled      | chr3:88198064-88216238    | 16.175  |
| Serhl         | 108 | 0  | 1.800086 | 654  | 10.9     | 14.9908  | 6.284536 | Stalled      | chr15:82928634-82947101   | 16.468  |
| Tsnaxip1      | 108 | 0  | 1.800086 | 113  | 1.883333 | 0.741981 | 4.078226 | Stalled      | chr8:108349643-108368576  | 16.934  |
| Zswim3        | 108 | 0  | 1.800086 | 91   | 1.516667 | 3.65555  | 68.69023 | Stalled      | chr2:164628613-164647627  | 17.015  |
| 2810046L04Rik | 108 | 0  | 1.800086 | 250  | 4.166667 | 6.06855  | 10.02667 | Stalled      | chr3:53265738-53285677    | 17.94   |
| Ngfr          | 108 | 0  | 1.800086 | 29   | 0.483333 | 0.357998 | 8.007723 | Stalled      | chr11:95430139-95451012   | 18.874  |
| Zfp251        | 108 | 0  | 1.800086 | 73   | 1.216667 | 8.9895   | 31.65954 | Stalled      | chr15:76682573-76703865   | 19.293  |
| Lmtk3         | 108 | 0  | 1.800086 | 85   | 1.416667 | 0.572255 | 3.130441 | Stalled      | chr7:53037316-53059500    | 20.185  |
| Ccdc90b       | 108 | 0  | 1.800086 | 37   | 0.616667 | 5.74139  | 42.30427 | Stalled      | chr7:99707658-99730803    | 21.146  |
| Myh7b         | 108 | 0  | 1.800086 | 144  | 2.4      | 0.397348 | 0.532147 | Stalled      | chr2:155434947-155460043  | 23.097  |
| Krba1         | 108 | 0  | 1.800086 | 167  | 2.783333 | 2.19704  | 7.33827  | Stalled      | chr6:48343584-48369854    | 24.271  |
| Rqcd1         | 108 | 0  | 1.800086 | 348  | 5.8      | 14.6036  | 28.91563 | Stalled      | chr1:74550633-74577416    | 24.784  |
| Usp18         | 108 | 0  | 1.800086 | 302  | 5.033333 | 5.6079   | 17.38295 | Stalled      | chr6:121193923-121220935  | 25.013  |
| Mme11         | 108 | 0  | 1.800086 | 122  | 2.033333 | 0.026061 | 0        | Unclassified | chr4:154241693-154269639  | 25.947  |
| Sic26a9       | 108 | 0  | 1.800086 | 58   | 0.966667 | 0.084503 | 0.304431 | Unclassified | chr1:133638598-133666982  | 26.385  |
| Pip4k2b       | 108 | 0  | 1.800086 | 489  | 8.15     | 18.2206  | 12.85273 | Stalled      | chr11:97576470-97608018   | 29.549  |
| Opn3          | 108 | 0  | 1.800086 | 205  | 3.416667 | 5.96812  | 25.03358 | Stalled      | chr1:177592558-177624721  | 30.164  |
| Fdft1         | 108 | 0  | 1.800086 | 532  | 8.866667 | 25.4605  | 15.10215 | Stalled      | chr14:63763987-63798630   | 32.644  |
| Chek2         | 108 | 0  | 1.800086 | 163  | 2.716667 | 3.6954   | 37.82637 | Stalled      | chr5:111267035-111303152  | 34.118  |
| BC055324      | 108 | 0  | 1.800086 | 194  | 3.233333 | 5.55072  | 34.36873 | Stalled      | chr1:165884138-165926912  | 40.775  |
| Atp6v0d1      | 108 | 0  | 1.800086 | 287  | 4.783333 | 22.879   | 17.95923 | Stalled      | chr8:108048369-108091940  | 41.572  |
| Odf2          | 108 | 0  | 1.800086 | 1032 | 17.2     | 28.1308  | 9.176573 | Stalled      | chr2:29743239-29787266    | 42.028  |
| Cdk11         | 108 | 0  | 1.800086 | 111  | 1.85     | 0.56152  | 4.457114 | Unclassified | chr12:70847834-70893694   | 43.861  |
| 6330512M04Rik | 108 | 0  | 1.800086 | 109  | 1.816667 | 0.134909 | 2.050308 | Unclassified | chr7:149512014-149560164  | 46.151  |
| Zbtb38        | 108 | 91 | 1.800086 | 1265 | 21.08333 | 5.59415  | 0.034538 | Stalled      | chr9:96585841-96634094    | 46.254  |
| Vapb          | 108 | 0  | 1.800086 | 328  | 5.466667 | 7.39972  | 6.489741 | Stalled      | chr2:173561071-173609837  | 46.767  |
| Smcp2         | 108 | 0  | 1.800086 | 1486 | 24.76667 | 84.6255  | 7.218242 | Stalled      | chr4:120640921-120691852  | 48.932  |
| Pccb          | 108 | 0  | 1.800086 | 215  | 3.583333 | 9.68124  | 61.38954 | Stalled      | chr9:100882456-100937294  | 52.839  |
| Gcn111        | 108 | 0  | 1.800086 | 1343 | 22.38333 | 16.3078  | 15.39391 | Stalled      | chr5:116013271-116072663  | 57.393  |
| Ranbp10       | 108 | 0  | 1.800086 | 496  | 8.266667 | 7.57787  | 13.72412 | Stalled      | chr8:108292207-108353250  | 59.044  |
| 1200016B10Rik | 108 | 0  | 1.800086 | 238  | 3.966667 | 1.95989  | 63.60272 | Stalled      | chr1:153214828-153277565  | 60.738  |
| Mlixip        | 108 | 0  | 1.800086 | 878  | 14.63333 | 13.4973  | 19.49086 | Stalled      | chr5:123842827-123907940  | 63.114  |
| Frs2          | 108 | 0  | 1.800086 | 507  | 8.45     | 2.57236  | 18.13439 | Stalled      | chr10:116507182-116587530 | 78.349  |
| Mybpc1        | 108 | 0  | 1.800086 | 132  | 2.2      | 0.121063 | 0.394134 | Unclassified | chr10:87981028-88069897   | 86.87   |
| Usp37         | 108 | 0  | 1.800086 | 1506 | 25.1     | 1.99269  | 0.066786 | Stalled      | chr1:74482084-74592860    | 108.777 |
| Mbni2         | 108 | 0  | 1.800086 | 1696 | 28.26667 | 7.06026  | 6.030278 | Stalled      | chr14:120672890-120830920 | 156.031 |

|                      |     |    |          |      |          |          |          |              |                           |         |
|----------------------|-----|----|----------|------|----------|----------|----------|--------------|---------------------------|---------|
| <b>Arnt2</b>         | 108 | 0  | 1.800086 | 182  | 3.033333 | 0.062049 | 1.887908 | Unclassified | chr7:91394788-91560469    | 163.682 |
| <b>BC052040</b>      | 108 | 0  | 1.800086 | 395  | 6.583333 | 3.5249   | 52.40897 | Stalled      | chr2:115405451-115604504  | 197.054 |
| <b>Tmem185b</b>      | 107 | 0  | 1.783419 | 12   | 0.2      | 8.2302   | 18.35893 | Stalled      | chr1:121420743-121424803  | 2.061   |
| <b>Rpl7a</b>         | 107 | 0  | 1.783419 | 284  | 4.733333 | 0        | 2.690171 | Stalled      | chr2:26764326-26768831    | 2.506   |
| <b>Ccdc107</b>       | 107 | 0  | 1.783419 | 15   | 0.25     | 20.7626  | 13.04976 | Stalled      | chr4:43504275-43508792    | 2.518   |
| <b>Cenpb</b>         | 107 | 0  | 1.783419 | 120  | 2        | 56.1873  | 2.933457 | Stalled      | chr2:131003024-131007748  | 2.725   |
| <b>Tcta</b>          | 107 | 0  | 1.783419 | 35   | 0.583333 | 8.68452  | 23.99716 | Stalled      | chr9:108205288-108210282  | 2.995   |
| <b>Gale</b>          | 107 | 0  | 1.783419 | 105  | 1.75     | 24.3613  | 0.86614  | Elongating   | chr4:135519079-135524093  | 3.015   |
| <b>Mettl1</b>        | 107 | 0  | 1.783419 | 88   | 1.466667 | 16.2684  | 5.172096 | Stalled      | chr10:126476987-126482517 | 3.531   |
| <b>Sys1</b>          | 107 | 0  | 1.783419 | 163  | 2.716667 | 52.5191  | 5.698224 | Stalled      | chr2:164284470-164291010  | 4.541   |
| <b>Fam71e1</b>       | 107 | 0  | 1.783419 | 40   | 0.666667 | 2.584    | 35.75753 | Stalled      | chr7:51749957-51756503    | 4.547   |
| <b>2310044H10Rik</b> | 107 | 0  | 1.783419 | 139  | 2.316667 | 27.8687  | 17.20131 | Stalled      | chr7:51745308-51753883    | 6.576   |
| <b>Mterfd2</b>       | 107 | 0  | 1.783419 | 92   | 1.533333 | 3.14082  | 8.578941 | Stalled      | chr1:95195787-95204447    | 6.661   |
| <b>2610039C10Rik</b> | 107 | 0  | 1.783419 | 69   | 1.15     | 19.5857  | 23.39401 | Stalled      | chr16:90719556-90729616   | 8.061   |
| <b>Cyp1b1</b>        | 107 | 0  | 1.783419 | 8    | 0.133333 | 0.149888 | 1.87939  | Unclassified | chr17:80106292-80116381   | 8.09    |
| <b>Taba1c</b>        | 107 | 0  | 1.783419 | 345  | 5.75     | 0        | 7.416449 | Stalled      | chr15:98858321-98868536   | 8.216   |
| <b>Zfp3</b>          | 107 | 0  | 1.783419 | 65   | 1.083333 | 1.06451  | 25.29634 | Stalled      | chr11:70575948-70586431   | 8.484   |
| <b>Snx15</b>         | 107 | 0  | 1.783419 | 43   | 0.716667 | 7.59189  | 16.14479 | Stalled      | chr19:6119403-6130215     | 8.813   |
| <b>4933413G19Rik</b> | 107 | 0  | 1.783419 | 56   | 0.933333 | 0        | 1.336098 | Unclassified | chr6:128323527-128335162  | 9.636   |
| <b>Ankrd54</b>       | 107 | 0  | 1.783419 | 185  | 3.083333 | 17.5011  | 6.922495 | Stalled      | chr15:78883523-78895289   | 9.767   |
| <b>Trp53</b>         | 107 | 0  | 1.783419 | 451  | 7.516667 | 40.0072  | 5.536943 | Stalled      | chr11:69391860-69405375   | 11.516  |
| <b>Eno1</b>          | 107 | 0  | 1.783419 | 535  | 8.916667 | 141.3666 | 6.320566 | Stalled      | chr4:149609305-149622982  | 11.678  |
| <b>3110003A17Rik</b> | 107 | 0  | 1.783419 | 148  | 2.466667 | 27.2714  | 24.47606 | Stalled      | chr10:17731066-17745058   | 11.993  |
| <b>Kin</b>           | 107 | 0  | 1.783419 | 171  | 2.85     | 11.9685  | 26.80001 | Stalled      | chr2:10000238-10014328    | 12.091  |
| <b>Ppp1r3b</b>       | 107 | 0  | 1.783419 | 45   | 0.75     | 0.750075 | 2.020994 | Unclassified | chr8:36436794-36451191    | 12.398  |
| <b>Pfdn2</b>         | 107 | 0  | 1.783419 | 172  | 2.866667 | 84.6721  | 16.82121 | Stalled      | chr1:173273829-173288301  | 12.473  |
| <b>Dok4</b>          | 107 | 0  | 1.783419 | 228  | 3.8      | 0.519927 | 0.863299 | Stalled      | chr8:97387727-97402212    | 12.486  |
| <b>Zfp207</b>        | 107 | 0  | 1.783419 | 447  | 7.45     | 38.0346  | 8.763639 | Stalled      | chr11:80194780-80209750   | 12.971  |
| <b>Zfand2a</b>       | 107 | 0  | 1.783419 | 235  | 3.916667 | 5.08009  | 13.75165 | Stalled      | chr5:139947170-139962445  | 13.276  |
| <b>Ccdc88b</b>       | 107 | 0  | 1.783419 | 183  | 3.05     | 13.2771  | 9.719771 | Stalled      | chr19:6919112-6934701     | 13.59   |
| <b>1200009I06Rik</b> | 107 | 0  | 1.783419 | 74   | 1.233333 | 0.591684 | 1.470232 | Unclassified | chr12:112653640-112669394 | 13.755  |
| <b>Sf1</b>           | 107 | 0  | 1.783419 | 1118 | 18.63333 | 58.9774  | 6.171432 | Stalled      | chr19:6361689-6378038     | 14.35   |
| <b>Necab3</b>        | 107 | 0  | 1.783419 | 285  | 4.75     | 0.396527 | 5.092478 | Stalled      | chr2:154370140-154386589  | 14.45   |
| <b>Reg4</b>          | 107 | 0  | 1.783419 | 22   | 0.366667 | 0.225949 | 0        | Unclassified | chr3:98024078-98040671    | 14.594  |
| <b>Cpsf4</b>         | 107 | 0  | 1.783419 | 493  | 8.216667 | 29.4212  | 7.524926 | Stalled      | chr5:145926092-145942909  | 14.818  |
| <b>Ube2b</b>         | 107 | 0  | 1.783419 | 222  | 3.7      | 18.7748  | 15.69534 | Stalled      | chr11:51798648-51815968   | 15.321  |
| <b>Meox1</b>         | 107 | 0  | 1.783419 | 35   | 0.583333 | 0.098676 | 0        | Unclassified | chr11:101738823-101757668 | 16.846  |
| <b>Ube2z</b>         | 107 | 0  | 1.783419 | 480  | 8        | 25.1058  | 11.20876 | Stalled      | chr11:95908749-95928678   | 17.93   |
| <b>Xkr5</b>          | 107 | 0  | 1.783419 | 86   | 1.433333 | 3.90523  | 45.43432 | Stalled      | chr8:18932728-18952973    | 18.246  |
| <b>Picd1</b>         | 107 | 0  | 1.783419 | 239  | 3.983333 | 3.88292  | 8.550294 | Stalled      | chr9:118980645-119004614  | 21.97   |
| <b>Nsun4</b>         | 107 | 0  | 1.783419 | 135  | 2.25     | 4.38727  | 31.3671  | Stalled      | chr4:115704376-115728481  | 22.106  |
| <b>Tecr</b>          | 107 | 0  | 1.783419 | 821  | 13.68333 | 62.8675  | 7.757421 | Stalled      | chr8:86095598-86120390    | 22.793  |
| <b>Atp5c1</b>        | 107 | 0  | 1.783419 | 486  | 8.1      | 56.748   | 20.78488 | Stalled      | chr2:9977658-10004137     | 24.48   |
| <b>Dram2</b>         | 107 | 0  | 1.783419 | 89   | 1.483333 | 2.87006  | 57.23405 | Stalled      | chr3:106348744-106377763  | 27.02   |
| <b>Tmf1</b>          | 107 | 0  | 1.783419 | 191  | 3.183333 | 8.16941  | 42.18514 | Stalled      | chr6:97101943-97131118    | 27.176  |
| <b>Rbbp5</b>         | 107 | 0  | 1.783419 | 257  | 4.283333 | 8.25954  | 20.35737 | Stalled      | chr1:134371943-134402242  | 28.3    |
| <b>Psbm2</b>         | 107 | 0  | 1.783419 | 551  | 9.183333 | 105.026  | 19.05843 | Stalled      | chr4:126352886-126386959  | 32.074  |
| <b>Hacl1</b>         | 107 | 0  | 1.783419 | 81   | 1.35     | 4.71338  | 53.25331 | Stalled      | chr14:32420411-32456151   | 33.741  |
| <b>Cdadc1</b>        | 107 | 0  | 1.783419 | 228  | 3.8      | 8.76906  | 19.85793 | Stalled      | chr14:60182783-60218796   | 34.014  |
| <b>Std1</b>          | 107 | 0  | 1.783419 | 257  | 4.283333 | 56.5345  | 33.22917 | Stalled      | chr15:81195473-81232124   | 34.652  |
| <b>Cept1</b>         | 107 | 0  | 1.783419 | 141  | 2.35     | 3.39627  | 61.17564 | Stalled      | chr3:106305177-106352679  | 45.503  |
| <b>Xpnpep3</b>       | 107 | 0  | 1.783419 | 228  | 3.8      | 1.70374  | 49.56486 | Stalled      | chr15:81228617-81285318   | 54.702  |
| <b>Anln</b>          | 107 | 0  | 1.783419 | 479  | 7.983333 | 3.51057  | 39.13065 | Stalled      | chr9:22135657-22195650    | 57.994  |
| <b>Rprd2</b>         | 107 | 0  | 1.783419 | 612  | 10.2     | 3.24489  | 24.87686 | Stalled      | chr3:95563795-95624876    | 59.082  |
| <b>Sp100</b>         | 107 | 0  | 1.783419 | 1310 | 21.83333 | 28.5352  | 1.835136 | Elongating   | chr1:87544624-87606023    | 59.4    |
| <b>Rbbp8</b>         | 107 | 0  | 1.783419 | 274  | 4.566667 | 3.90157  | 73.92209 | Stalled      | chr18:11814350-11901716   | 85.367  |
| <b>Eya3</b>          | 107 | 0  | 1.783419 | 625  | 10.41667 | 5.89291  | 24.35143 | Stalled      | chr4:132192960-132280678  | 85.719  |
| <b>Sacs</b>          | 107 | 0  | 1.783419 | 612  | 10.2     | 1.77296  | 0.283883 | Stalled      | chr14:61755293-61859530   | 102.238 |
| <b>1700081L11Rik</b> | 107 | 0  | 1.783419 | 1174 | 19.56667 | 7.63985  | 25.62388 | Stalled      | chr11:104194542-104305605 | 109.064 |
| <b>Smg1</b>          | 107 | 0  | 1.783419 | 1021 | 17.01667 | 8.36511  | 33.62442 | Stalled      | chr7:125274825-125389151  | 112.327 |
| <b>D930015E06Rik</b> | 107 | 0  | 1.783419 | 2179 | 36.31667 | 11.7757  | 20.10019 | Stalled      | chr3:83702208-83846083    | 141.876 |
| <b>Ppp1r12b</b>      | 107 | 59 | 1.783419 | 628  | 10.46667 | 3.95003  | 27.75999 | Stalled      | chr1:136662519-136854517  | 189.999 |
| <b>Ptpn2</b>         | 107 | 0  | 1.783419 | 688  | 11.46667 | 0.079299 | 2.674808 | Unclassified | chr12:117722192-118516639 | 792.448 |
| <b>Hist4h4</b>       | 106 | 68 | 1.766751 | 0    | 0        | 31.2934  | 630      | Unclassified | chr6:136752588-136754900  | 0.313   |
| <b>Vmo1</b>          | 106 | 0  | 1.766751 | 3    | 0.05     | 0.209791 | 0.16441  | Unclassified | chr11:70327017-70330118   | 1.102   |
| <b>Hcrt</b>          | 106 | 0  | 1.766751 | 5    | 0.083333 | 7.01899  | 0.137405 | Unclassified | chr11:100623006-100626245 | 1.24    |
| <b>Wdr5b</b>         | 106 | 0  | 1.766751 | 26   | 0.433333 | 14.5425  | 7.511984 | Unclassified | chr16:36039275-36043060   | 1.786   |
| <b>Med31</b>         | 106 | 0  | 1.766751 | 24   | 0.4      | 7.68432  | 12.81727 | Stalled      | chr11:72025225-72031094   | 3.87    |
| <b>Sfrs5</b>         | 106 | 0  | 1.766751 | 219  | 3.65     | 119.612  | 7.902065 | Stalled      | chr12:82044490-82051494   | 5.005   |
| <b>Rgs19</b>         | 106 | 0  | 1.766751 | 276  | 4.6      | 30.4736  | 6.983187 | Stalled      | chr2:181423127-181430629  | 5.503   |
| <b>Gm166</b>         | 106 | 0  | 1.766751 | 130  | 2.166667 | 3.70094  | 4.056152 | Stalled      | chr7:134726601-134734109  | 5.509   |
| <b>Lat</b>           | 106 | 0  | 1.766751 | 25   | 0.416667 | 1.03831  | 6.972937 | Stalled      | chr7:133507341-133515048  | 5.708   |
| <b>Rps3</b>          | 106 | 0  | 1.766751 | 608  | 10.13333 | 496.388  | 2.835859 | Stalled      | chr7:106626406-106634219  | 5.814   |
| <b>Cncd1</b>         | 106 | 0  | 1.766751 | 113  | 1.883333 | 0.671503 | 0.07374  | Stalled      | chr7:152115835-152127830  | 9.996   |
| <b>Pp11r</b>         | 106 | 0  | 1.766751 | 86   | 1.433333 | 10.1646  | 5.472139 | Stalled      | chr15:97541449-97553581   | 10.133  |
| <b>Pldn</b>          | 106 | 0  | 1.766751 | 103  | 1.716667 | 5.63034  | 26.59831 | Stalled      | chr2:122562240-122575223  | 10.984  |
| <b>Sema3b</b>        | 106 | 0  | 1.766751 | 84   | 1.4      | 0.14764  | 0.322794 | Stalled      | chr9:107500445-107513572  | 11.128  |
| <b>Ceacam19</b>      | 106 | 0  | 1.766751 | 202  | 3.366667 | 0.197162 | 0.052644 | Stalled      | chr7:20461090-20475314    | 12.225  |
| <b>Zbp1</b>          | 106 | 0  | 1.766751 | 420  | 7        | 23.6158  | 3.933027 | Stalled      | chr2:173032115-173046423  | 12.309  |
| <b>Cntnap1</b>       | 106 | 0  | 1.766751 | 156  | 2.6      | 1.36512  | 1.844963 | Elongating   | chr11:101035430-101052034 | 14.605  |
| <b>Rnf40</b>         | 106 | 0  | 1.766751 | 405  | 6.75     | 24.4092  | 3.98435  | Stalled      | chr7:134730211-134747119  | 14.909  |
| <b>Arfgap1</b>       | 106 | 0  | 1.766751 | 422  | 7.033333 | 17.3671  | 13.06437 | Stalled      | chr2:180699973-180717147  | 15.175  |
| <b>Slc38a3</b>       | 106 | 0  | 1.766751 | 22   | 0.366667 | 0.049442 | 0.408936 | Unclassified | chr9:107553485-107571705  | 16.221  |
| <b>Chek1</b>         | 106 | 0  | 1.766751 | 124  | 2.066667 | 2.61028  | 38.93638 | Stalled      | chr9:36516066-36536243    | 18.178  |
| <b>Hexdc</b>         | 106 | 0  | 1.766751 | 343  | 5.716667 | 5.06546  | 8.989162 | Stalled      | chr11:121063746-121083969 | 18.224  |
| <b>Nup54</b>         | 106 | 0  | 1.766751 | 209  | 3.483333 | 8.5746   | 30.00042 | Stalled      | chr5:92844565-92866225    | 19.661  |



|                      |     |    |          |      |          |          |          |              |                           |         |
|----------------------|-----|----|----------|------|----------|----------|----------|--------------|---------------------------|---------|
| <b>Frg1</b>          | 106 | 0  | 1.766751 | 171  | 2.85     | 25.105   | 11.31719 | Stalled      | chr8:42482808-42504472    | 19.665  |
| <b>Nipsnap1</b>      | 106 | 0  | 1.766751 | 146  | 2.433333 | 5.1418   | 8.251436 | Stalled      | chr11:4772005-4794203     | 20.199  |
| <b>Prdm9</b>         | 106 | 0  | 1.766751 | 43   | 0.716667 | 1.4191   | 5.256085 | Stalled      | chr17:15680043-15702287   | 20.245  |
| <b>Lgals9</b>        | 106 | 0  | 1.766751 | 387  | 6.45     | 48.6123  | 8.369619 | Stalled      | chr11:78776480-78800426   | 21.947  |
| <b>Sifn3</b>         | 106 | 0  | 1.766751 | 181  | 3.016667 | 3.72485  | 11.42274 | Stalled      | chr11:83002831-83028656   | 23.826  |
| <b>Xpc</b>           | 106 | 0  | 1.766751 | 171  | 2.85     | 3.84296  | 27.06787 | Stalled      | chr6:91439301-91467882    | 26.582  |
| <b>Bsdcl1</b>        | 106 | 0  | 1.766751 | 308  | 5.133333 | 11.3927  | 12.88695 | Stalled      | chr4:129136922-129165676  | 26.755  |
| <b>Rad51c</b>        | 106 | 0  | 1.766751 | 82   | 1.366667 | 3.37958  | 44.39383 | Stalled      | chr11:87191108-87219997   | 26.89   |
| <b>Traf2</b>         | 106 | 0  | 1.766751 | 903  | 15.05    | 12.3944  | 8.455935 | Stalled      | chr2:25373501-25404414    | 28.914  |
| <b>Rhoa</b>          | 106 | 0  | 1.766751 | 633  | 10.55    | 45.3183  | 25.23762 | Stalled      | chr9:108206535-108240270  | 31.736  |
| <b>3110043021Rik</b> | 106 | 0  | 1.766751 | 165  | 2.75     | 2.20374  | 42.29607 | Stalled      | chr4:35138530-35175129    | 34.6    |
| <b>Ripk2</b>         | 106 | 0  | 1.766751 | 198  | 3.3      | 6.34337  | 30.52451 | Stalled      | chr4:16050521-16092645    | 40.125  |
| <b>Hspa4</b>         | 106 | 0  | 1.766751 | 1438 | 23.96667 | 44.3011  | 13.9859  | Stalled      | chr11:53073315-53115981   | 40.667  |
| <b>Capza1</b>        | 106 | 0  | 1.766751 | 680  | 11.33333 | 12.9694  | 25.36925 | Stalled      | chr3:104625702-104669423  | 41.722  |
| <b>Icgg</b>          | 106 | 0  | 1.766751 | 221  | 3.683333 | 0.632575 | 39.36857 | Stalled      | chr16:33014355-33058272   | 41.918  |
| <b>Fbxo8</b>         | 106 | 0  | 1.766751 | 180  | 3        | 4.18924  | 30.15739 | Stalled      | chr8:59027930-59072736    | 42.807  |
| <b>Nudt3</b>         | 106 | 0  | 1.766751 | 688  | 11.46667 | 22.399   | 12.60559 | Stalled      | chr17:27716335-27762397   | 44.063  |
| <b>Eln</b>           | 106 | 0  | 1.766751 | 55   | 0.916667 | 0.037286 | 0.44253  | Unclassified | chr5:135178465-135225124  | 44.66   |
| <b>Mcoln2</b>        | 106 | 0  | 1.766751 | 463  | 7.716667 | 2.79941  | 9.945129 | Stalled      | chr3:145810796-145858476  | 45.681  |
| <b>Mett10d</b>       | 106 | 0  | 1.766751 | 637  | 10.61667 | 12.0741  | 23.90067 | Stalled      | chr11:74582364-74632194   | 47.831  |
| <b>Adam17</b>        | 106 | 0  | 1.766751 | 420  | 7        | 12.8512  | 39.65779 | Stalled      | chr12:21329369-21381452   | 50.084  |
| <b>Txnrd2</b>        | 106 | 0  | 1.766751 | 336  | 5.6      | 0        | 24.65248 | Stalled      | chr16:18424509-18479166   | 52.658  |
| <b>D19Wsu162e</b>    | 106 | 0  | 1.766751 | 803  | 13.38333 | 15.8742  | 9.580917 | Stalled      | chr19:46671640-46731874   | 58.235  |
| <b>Sacm1l</b>        | 106 | 0  | 1.766751 | 262  | 4.366667 | 5.12316  | 31.45784 | Stalled      | chr9:123436999-123501716  | 62.718  |
| <b>Dicer1</b>        | 106 | 0  | 1.766751 | 761  | 12.68333 | 5.52846  | 12.88457 | Stalled      | chr12:105925951-105992162 | 64.212  |
| <b>Depdc1b</b>       | 106 | 0  | 1.766751 | 247  | 4.116667 | 2.60815  | 20.58819 | Stalled      | chr13:109104530-109179751 | 73.222  |
| <b>Spnb2</b>         | 106 | 0  | 1.766751 | 620  | 10.33333 | 9.18596  | 29.85554 | Stalled      | chr11:29999394-30100257   | 98.864  |
| <b>Ap2b1</b>         | 106 | 0  | 1.766751 | 775  | 12.91667 | 14.268   | 23.01197 | Stalled      | chr11:83114198-83218535   | 102.338 |
| <b>Zhx2</b>          | 106 | 0  | 1.766751 | 1056 | 17.6     | 3.6388   | 8.048204 | Stalled      | chr15:57524221-57761387   | 145.167 |
| <b>Kcnq5</b>         | 106 | 0  | 1.766751 | 1711 | 28.51667 | 2.10971  | 24.24792 | Stalled      | chr1:21388488-21954023    | 563.536 |
| <b>Rmrp</b>          | 105 | 0  | 1.750084 | 0    | 0        | 8.89893  | 158      | Unclassified | chr4:43505656-43507931    | 0.276   |
| <b>Cldn13</b>        | 105 | 0  | 1.750084 | 1    | 0.016667 | 7.69293  | 4.350548 | Unclassified | chr5:135390119-135393396  | 1.278   |
| <b>Psenen</b>        | 105 | 0  | 1.750084 | 3    | 0.05     | 27.1367  | 13.87952 | Unclassified | chr7:31346884-31350203    | 1.32    |
| <b>Spcs1</b>         | 105 | 0  | 1.750084 | 10   | 0.166667 | 55.0058  | 17.16307 | Unclassified | chr14:31813011-31816852   | 1.842   |
| <b>U2af1l4</b>       | 105 | 0  | 1.750084 | 15   | 0.25     | 18.9454  | 9.154998 | Stalled      | chr7:31346358-31350383    | 2.026   |
| <b>Srm</b>           | 105 | 0  | 1.750084 | 236  | 3.933333 | 77.4202  | 2.57626  | Stalled      | chr4:147963621-147968728  | 3.108   |
| <b>Sphk1</b>         | 105 | 0  | 1.750084 | 40   | 0.666667 | 0.40822  | 0.604253 | Stalled      | chr11:116392660-116397984 | 3.325   |
| <b>Dhps</b>          | 105 | 0  | 1.750084 | 178  | 2.966667 | 15.2921  | 6.321541 | Stalled      | chr8:87593655-87599060    | 3.406   |
| <b>Josd2</b>         | 105 | 0  | 1.750084 | 57   | 0.95     | 19.588   | 6.362099 | Stalled      | chr7:51721425-51727021    | 3.597   |
| <b>Rplp2</b>         | 105 | 0  | 1.750084 | 291  | 4.85     | 818.938  | 4.421296 | Stalled      | chr7:148631548-148637241  | 3.694   |
| <b>Mesdc1</b>        | 105 | 0  | 1.750084 | 189  | 3.15     | 15.302   | 4.023018 | Stalled      | chr7:91029004-91034851    | 3.848   |
| <b>Ccdc103</b>       | 105 | 0  | 1.750084 | 5    | 0.083333 | 0.745897 | 70.84786 | Stalled      | chr11:102740557-102746529 | 3.973   |
| <b>Cip1</b>          | 105 | 0  | 1.750084 | 49   | 0.816667 | 12.6823  | 18.59293 | Stalled      | chr2:84563278-84569425    | 4.148   |
| <b>Nxn12</b>         | 105 | 0  | 1.750084 | 13   | 0.216667 | 3.57019  | 1.761693 | Unclassified | chr13:51264393-51270556   | 4.164   |
| <b>Poir2h</b>        | 105 | 0  | 1.750084 | 27   | 0.45     | 22.0712  | 20.00779 | Stalled      | chr16:20715898-20722338   | 4.441   |
| <b>D2Wsu81e</b>      | 105 | 0  | 1.750084 | 141  | 2.35     | 18.1081  | 4.258603 | Stalled      | chr2:30028966-30035975    | 5.01    |
| <b>Gpr162</b>        | 105 | 0  | 1.750084 | 15   | 0.25     | 0.363994 | 1.378453 | Unclassified | chr6:124808462-124815935  | 5.474   |
| <b>4932411G14Rik</b> | 105 | 0  | 1.750084 | 10   | 0.166667 | 0.080281 | 0        | Unclassified | chr13:59827285-59835113   | 5.829   |
| <b>Otub1</b>         | 105 | 0  | 1.750084 | 307  | 5.116667 | 37.4041  | 8.543428 | Stalled      | chr19:7272695-7282774     | 8.08    |
| <b>Ddx39</b>         | 105 | 0  | 1.750084 | 713  | 11.88333 | 61.5981  | 4.617386 | Stalled      | chr8:86237097-86247247    | 8.151   |
| <b>Gtf3c6</b>        | 105 | 73 | 1.750084 | 91   | 1.516667 | 21.2188  | 29.71531 | Stalled      | chr10:39969008-39979471   | 8.464   |
| <b>Vim</b>           | 105 | 55 | 1.750084 | 187  | 3.116667 | 91.9828  | 10.74315 | Stalled      | chr2:13493937-13504453    | 8.517   |
| <b>Sec61b</b>        | 105 | 0  | 1.750084 | 179  | 2.983333 | 101.931  | 13.92414 | Stalled      | chr4:47485532-47496105    | 8.574   |
| <b>Mettl3</b>        | 105 | 0  | 1.750084 | 240  | 4        | 0        | 10.09276 | Stalled      | chr14:52914516-52926799   | 10.284  |
| <b>Rexo4</b>         | 105 | 0  | 1.750084 | 320  | 5.333333 | 21.7317  | 6.881149 | Stalled      | chr2:26809082-26821906    | 10.825  |
| <b>Glt8d1</b>        | 105 | 0  | 1.750084 | 421  | 7.016667 | 4.49709  | 5.015517 | Stalled      | chr14:31812618-31825625   | 11.008  |
| <b>Shc1</b>          | 105 | 0  | 1.750084 | 164  | 2.733333 | 12.6071  | 15.07341 | Stalled      | chr3:89220472-89233949    | 11.478  |
| <b>Pdik1l</b>        | 105 | 0  | 1.750084 | 161  | 2.683333 | 2.95428  | 23.63714 | Stalled      | chr4:133830920-133845761  | 12.842  |
| <b>Zfp382</b>        | 105 | 0  | 1.750084 | 85   | 1.416667 | 2.33768  | 27.26278 | Stalled      | chr7:30904966-30920051    | 13.086  |
| <b>2310008H09Rik</b> | 105 | 0  | 1.750084 | 407  | 6.783333 | 9.35633  | 5.327791 | Stalled      | chr7:125985733-126001512  | 13.78   |
| <b>Cisd1</b>         | 105 | 0  | 1.750084 | 242  | 4.033333 | 31.1275  | 13.75678 | Stalled      | chr10:70793241-70809597   | 14.357  |
| <b>Zbtb7a</b>        | 105 | 0  | 1.750084 | 1198 | 19.96667 | 18.486   | 1.708918 | Elongating   | chr10:80597015-80614402   | 15.388  |
| <b>Zfp82</b>         | 105 | 0  | 1.750084 | 74   | 1.233333 | 2.29742  | 51.00055 | Stalled      | chr7:30841052-30859842    | 16.791  |
| <b>Strap</b>         | 105 | 0  | 1.750084 | 346  | 5.766667 | 31.9282  | 17.38966 | Stalled      | chr6:137681602-137700451  | 16.85   |
| <b>Sumf2</b>         | 105 | 0  | 1.750084 | 181  | 3.016667 | 5.98828  | 31.60781 | Stalled      | chr5:130320865-130339827  | 16.963  |
| <b>Laptm4a</b>       | 105 | 0  | 1.750084 | 298  | 4.966667 | 26.232   | 7.004363 | Stalled      | chr12:8926112-8945547     | 17.436  |
| <b>2310057M21Rik</b> | 105 | 0  | 1.750084 | 177  | 2.95     | 5.74181  | 24.98881 | Stalled      | chr7:138486231-138508212  | 19.982  |
| <b>Aptx</b>          | 105 | 0  | 1.750084 | 241  | 4.016667 | 3.05025  | 20.71862 | Stalled      | chr4:40629110-40652220    | 21.111  |
| <b>Map3k8</b>        | 105 | 0  | 1.750084 | 1013 | 16.88333 | 11.174   | 6.984911 | Stalled      | chr18:4331324-4354951     | 21.628  |
| <b>Serbp1</b>        | 105 | 0  | 1.750084 | 655  | 10.91667 | 83.9351  | 14.378   | Stalled      | chr6:67214972-67239296    | 22.325  |
| <b>Wnt9b</b>         | 105 | 0  | 1.750084 | 39   | 0.65     | 0.045378 | 1.419782 | Unclassified | chr11:103588676-103613135 | 22.46   |
| <b>Sic24a6</b>       | 105 | 0  | 1.750084 | 160  | 2.666667 | 2.54595  | 7.804976 | Stalled      | chr5:120959200-120984033  | 22.834  |
| <b>Mobkl3</b>        | 105 | 0  | 1.750084 | 244  | 4.066667 | 3.81233  | 27.86799 | Stalled      | chr1:55186088-55211743    | 23.656  |
| <b>Sp2</b>           | 105 | 0  | 1.750084 | 812  | 13.53333 | 7.70915  | 9.420728 | Stalled      | chr11:96814651-96841002   | 24.352  |
| <b>Rasa4</b>         | 105 | 0  | 1.750084 | 414  | 6.9      | 8.23514  | 5.255419 | Stalled      | chr5:136557785-136587730  | 27.946  |
| <b>Dhdds</b>         | 105 | 0  | 1.750084 | 428  | 7.133333 | 16.1802  | 10.07249 | Stalled      | chr4:133524971-133558779  | 31.809  |
| <b>Unc45b</b>        | 105 | 0  | 1.750084 | 62   | 1.033333 | 0.101058 | 1.337742 | Unclassified | chr11:82722754-82756907   | 32.154  |
| <b>Anapc5</b>        | 105 | 0  | 1.750084 | 943  | 15.71667 | 61.8107  | 16.27356 | Stalled      | chr5:123237469-123273348  | 33.88   |
| <b>Nr1d2</b>         | 105 | 0  | 1.750084 | 90   | 1.5      | 0.7801   | 21.68533 | Stalled      | chr14:19036569-19073620   | 35.052  |
| <b>Bai2</b>          | 105 | 0  | 1.750084 | 93   | 1.55     | 0.082864 | 0.281692 | Unclassified | chr4:129660407-129699877  | 37.471  |
| <b>Ints3</b>         | 105 | 0  | 1.750084 | 289  | 4.816667 | 17.9593  | 51.71083 | Stalled      | chr3:90195309-90239558    | 42.25   |
| <b>Eftud2</b>        | 105 | 0  | 1.750084 | 854  | 14.23333 | 34.9079  | 10.1039  | Stalled      | chr11:102699785-102744289 | 42.505  |
| <b>Gfm1</b>          | 105 | 0  | 1.750084 | 621  | 10.35    | 15.0879  | 9.452617 | Stalled      | chr3:67232036-67278990    | 44.955  |
| <b>Hmgxb3</b>        | 105 | 0  | 1.750084 | 514  | 8.566667 | 6.41443  | 34.5356  | Stalled      | chr18:61290930-61338703   | 45.774  |
| <b>Golga3</b>        | 105 | 0  | 1.750084 | 278  | 4.633333 | 6.01468  | 28.66858 | Stalled      | chr5:110603719-110652174  | 46.456  |
| <b>Sfrs2ip</b>       | 105 | 0  | 1.750084 | 779  | 12.98333 | 14.9526  | 17.81181 | Stalled      | chr15:96242128-96293274   | 49.147  |



|                      |     |    |          |      |          |          |          |              |                           |         |
|----------------------|-----|----|----------|------|----------|----------|----------|--------------|---------------------------|---------|
| <b>Bcl2l13</b>       | 105 | 0  | 1.750084 | 584  | 9.733333 | 7.28891  | 31.3887  | Stalled      | chr6:120784247-120842860  | 56.614  |
| <b>Ankrd26</b>       | 105 | 0  | 1.750084 | 99   | 1.65     | 4.01646  | 50.61945 | Stalled      | chr6:118452581-118514274  | 59.694  |
| <b>Eprs</b>          | 105 | 0  | 1.750084 | 1480 | 24.66667 | 28.9956  | 20.14089 | Stalled      | chr1:187184973-187252234  | 65.262  |
| <b>Wdr37</b>         | 105 | 0  | 1.750084 | 578  | 9.633333 | 6.695    | 27.86705 | Stalled      | chr13:8802213-8872288     | 68.076  |
| <b>Slc38a9</b>       | 105 | 0  | 1.750084 | 289  | 4.816667 | 3.8158   | 14.4174  | Stalled      | chr13:113448983-113523106 | 72.124  |
| <b>Ppap2b</b>        | 105 | 0  | 1.750084 | 161  | 2.683333 | 3.09982  | 11.6965  | Stalled      | chr4:104827951-104905372  | 75.422  |
| <b>Trip11</b>        | 105 | 0  | 1.750084 | 533  | 8.883333 | 5.55737  | 29.04376 | Stalled      | chr12:103075582-103153381 | 75.8    |
| <b>Gxylt2</b>        | 105 | 0  | 1.750084 | 104  | 1.733333 | 0.063169 | 0.977128 | Unclassified | chr6:100652727-100755075  | 100.349 |
| <b>Iqck</b>          | 105 | 0  | 1.750084 | 171  | 2.85     | 0.097046 | 79.57419 | Stalled      | chr7:125997288-126116166  | 116.879 |
| <b>Tll2</b>          | 105 | 0  | 1.750084 | 172  | 2.866667 | 0.346182 | 6.218367 | Unclassified | chr19:41158470-41283264   | 122.795 |
| <b>Osbpl9</b>        | 105 | 57 | 1.750084 | 1081 | 18.01667 | 15.2003  | 6.769096 | Stalled      | chr4:108733749-108876845  | 141.097 |
| <b>Tle4</b>          | 105 | 0  | 1.750084 | 1818 | 30.3     | 8.80105  | 16.58027 | Stalled      | chr19:14522561-14674473   | 149.913 |
| <b>Hist1h4h</b>      | 104 | 49 | 1.733416 | 0    | 0        | 0        | 450      | Unclassified | chr13:23620918-23623388   | 0.471   |
| <b>Med11</b>         | 104 | 0  | 1.733416 | 22   | 0.366667 | 31.7116  | 10.31342 | Unclassified | chr11:70263432-70267228   | 1.797   |
| <b>Rpl29</b>         | 104 | 0  | 1.733416 | 89   | 1.483333 | 37.1573  | 3.878374 | Stalled      | chr9:106329869-106333898  | 2.03    |
| <b>Tmem42</b>        | 104 | 0  | 1.733416 | 10   | 0.166667 | 5.87525  | 29.55203 | Stalled      | chr9:122928443-122932608  | 2.166   |
| <b>Serp1</b>         | 104 | 0  | 1.733416 | 188  | 3.133333 | 145.033  | 6.722068 | Stalled      | chr3:58325897-58331806    | 3.91    |
| <b>Cycs</b>          | 104 | 0  | 1.733416 | 66   | 1.1      | 1.99127  | 14.16068 | Stalled      | chr6:50512561-50518473    | 3.913   |
| <b>Phb2</b>          | 104 | 0  | 1.733416 | 243  | 4.05     | 149.902  | 5.205418 | Stalled      | chr6:124660306-124666963  | 4.658   |
| <b>H2-gs10</b>       | 104 | 0  | 1.733416 | 213  | 3.55     | 137.635  | 7.386494 | Stalled      | chr17:35514561-35521619   | 5.059   |
| <b>Pop5</b>          | 104 | 0  | 1.733416 | 281  | 4.683333 | 33.5332  | 0.390245 | Stalled      | chr5:115683859-115690979  | 5.121   |
| <b>Mrpl44</b>        | 104 | 0  | 1.733416 | 54   | 0.9      | 20.5183  | 11.74922 | Stalled      | chr1:79770592-79778020    | 5.429   |
| <b>Amigo1</b>        | 104 | 0  | 1.733416 | 47   | 0.783333 | 0.622783 | 1.727704 | Elongating   | chr3:107987252-107994695  | 5.444   |
| <b>Rps24</b>         | 104 | 0  | 1.733416 | 403  | 6.716667 | 163.031  | 4.330326 | Stalled      | chr14:25307902-25315368   | 5.467   |
| <b>Ndufb9</b>        | 104 | 0  | 1.733416 | 131  | 2.183333 | 83.9924  | 16.04252 | Stalled      | chr15:58763364-58771044   | 5.681   |
| <b>Mpg</b>           | 104 | 0  | 1.733416 | 179  | 2.983333 | 13.8842  | 5.982562 | Stalled      | chr11:32124504-32132701   | 6.198   |
| <b>Alg10b</b>        | 104 | 0  | 1.733416 | 51   | 0.85     | 5.47702  | 25.458   | Stalled      | chr15:90052741-90060985   | 6.245   |
| <b>Rab25</b>         | 104 | 0  | 1.733416 | 27   | 0.45     | 0.483635 | 0.65137  | Unclassified | chr3:88345950-88354201    | 6.252   |
| <b>Vhl</b>           | 104 | 0  | 1.733416 | 107  | 1.783333 | 6.22376  | 9.25613  | Stalled      | chr6:113572014-113581627  | 7.614   |
| <b>Srp9</b>          | 104 | 0  | 1.733416 | 146  | 2.433333 | 36.4965  | 14.35054 | Stalled      | chr1:184052867-184062546  | 7.68    |
| <b>Ggct</b>          | 104 | 0  | 1.733416 | 24   | 0.4      | 7.14998  | 29.71632 | Stalled      | chr6:54935088-54944861    | 7.774   |
| <b>Sfxn3</b>         | 104 | 0  | 1.733416 | 59   | 0.983333 | 3.05499  | 6.643627 | Stalled      | chr19:45120090-45130873   | 8.784   |
| <b>Ndufa5</b>        | 104 | 0  | 1.733416 | 43   | 0.716667 | 38.9677  | 35.53688 | Stalled      | chr6:24468665-24479687    | 9.023   |
| <b>Ndufb3</b>        | 104 | 0  | 1.733416 | 60   | 1        | 26.7959  | 15.02791 | Stalled      | chr1:58641442-58652792    | 9.351   |
| <b>Rbm4</b>          | 104 | 0  | 1.733416 | 198  | 3.3      | 12.7838  | 13.71526 | Stalled      | chr19:4784292-4795877     | 9.586   |
| <b>Igsf6</b>         | 104 | 0  | 1.733416 | 88   | 1.466667 | 0        | 1.456677 | Stalled      | chr7:128207580-128220044  | 10.465  |
| <b>Slc16a3</b>       | 104 | 0  | 1.733416 | 193  | 3.216667 | 27.4176  | 0.704974 | Stalled      | chr11:120807797-120820314 | 10.518  |
| <b>Slc25a28</b>      | 104 | 0  | 1.733416 | 190  | 3.166667 | 24.9441  | 16.0223  | Stalled      | chr19:43738291-43751371   | 11.081  |
| <b>6720456B07Rik</b> | 104 | 0  | 1.733416 | 223  | 3.716667 | 80.3641  | 11.55432 | Stalled      | chr6:113552765-113566945  | 12.181  |
| <b>Zfp658</b>        | 104 | 0  | 1.733416 | 106  | 1.766667 | 0.539049 | 12.39068 | Stalled      | chr7:50815739-50830831    | 13.093  |
| <b>Hsd1l</b>         | 104 | 0  | 1.733416 | 140  | 2.333333 | 5.52987  | 8.19026  | Stalled      | chr8:122085878-122101100  | 13.223  |
| <b>Serpinb9</b>      | 104 | 0  | 1.733416 | 135  | 2.25     | 3.78849  | 8.001302 | Stalled      | chr13:33094409-33109824   | 13.416  |
| <b>Dnajc14</b>       | 104 | 0  | 1.733416 | 140  | 2.333333 | 12.1042  | 21.40204 | Stalled      | chr10:128240731-128256502 | 13.772  |
| <b>Alg5</b>          | 104 | 0  | 1.733416 | 194  | 3.233333 | 12.0743  | 24.18012 | Stalled      | chr3:54537460-54553717    | 14.258  |
| <b>Zfp583</b>        | 104 | 0  | 1.733416 | 46   | 0.766667 | 0.375451 | 1.843168 | Unclassified | chr7:6267266-6284036      | 14.771  |
| <b>Ublcp1</b>        | 104 | 0  | 1.733416 | 84   | 1.4      | 2.53952  | 45.38511 | Stalled      | chr11:44268078-44286050   | 15.973  |
| <b>Ncaph2</b>        | 104 | 0  | 1.733416 | 804  | 13.4     | 36.5731  | 4.654992 | Stalled      | chr15:89184152-89203259   | 17.108  |
| <b>Slc25a32</b>      | 104 | 0  | 1.733416 | 143  | 2.383333 | 4.84753  | 40.17976 | Stalled      | chr15:38925736-38946262   | 18.527  |
| <b>Ctla</b>          | 104 | 0  | 1.733416 | 672  | 11.2     | 190.268  | 10.6138  | Stalled      | chr4:44023514-44045718    | 20.205  |
| <b>Tmem231</b>       | 104 | 0  | 1.733416 | 97   | 1.616667 | 1.86871  | 14.64084 | Stalled      | chr8:114435917-114459691  | 21.775  |
| <b>Psmb1</b>         | 104 | 0  | 1.733416 | 329  | 5.483333 | 93.7573  | 17.40268 | Stalled      | chr17:15612684-15637240   | 22.557  |
| <b>Ano7</b>          | 104 | 0  | 1.733416 | 130  | 2.166667 | 0.426281 | 1.984061 | Unclassified | chr1:95268472-95300079    | 29.608  |
| <b>Uchl5</b>         | 104 | 0  | 1.733416 | 265  | 4.416667 | 19.2005  | 30.75869 | Stalled      | chr1:145622407-145654596  | 30.19   |
| <b>Eif2a</b>         | 104 | 0  | 1.733416 | 329  | 5.483333 | 14.6926  | 38.55701 | Stalled      | chr3:58327742-58361423    | 31.682  |
| <b>Dcaf13</b>        | 104 | 0  | 1.733416 | 269  | 4.483333 | 20.6968  | 38.77359 | Stalled      | chr15:38942419-38978401   | 33.983  |
| <b>Lpcat3</b>        | 104 | 0  | 1.733416 | 1125 | 18.75    | 19.4544  | 6.446036 | Stalled      | chr6:124611121-124654734  | 41.614  |
| <b>Mettl9</b>        | 104 | 0  | 1.733416 | 313  | 5.216667 | 10.3369  | 26.04578 | Stalled      | chr7:128175958-128220349  | 42.392  |
| <b>Cd38</b>          | 104 | 94 | 1.733416 | 279  | 4.65     | 5.705    | 13.89413 | Stalled      | chr5:44258065-44303613    | 43.549  |
| <b>Tatdn1</b>        | 104 | 0  | 1.733416 | 571  | 9.516667 | 6.72638  | 33.30935 | Stalled      | chr15:58721707-58767285   | 43.579  |
| <b>Pygb</b>          | 104 | 0  | 1.733416 | 842  | 14.03333 | 33.8312  | 13.24642 | Stalled      | chr2:150610531-150657484  | 44.954  |
| <b>Akt2</b>          | 104 | 0  | 1.733416 | 728  | 12.13333 | 20.5352  | 10.71166 | Stalled      | chr7:28374578-28424472    | 47.895  |
| <b>Stam2</b>         | 104 | 0  | 1.733416 | 244  | 4.066667 | 2.95797  | 40.16872 | Stalled      | chr2:52547724-52603183    | 53.46   |
| <b>Rnf160</b>        | 104 | 0  | 1.733416 | 598  | 9.966667 | 4.83941  | 16.58077 | Stalled      | chr16:87376895-87434851   | 55.957  |
| <b>Enpp3</b>         | 104 | 0  | 1.733416 | 105  | 1.75     | 0.077399 | 0        | Unclassified | chr10:24493619-24558001   | 62.383  |
| <b>X99384</b>        | 104 | 0  | 1.733416 | 133  | 2.216667 | 0.362756 | 1.925828 | Unclassified | chr10:60782404-60848271   | 63.868  |
| <b>Pemt</b>          | 104 | 0  | 1.733416 | 198  | 3.3      | 1.04498  | 2.230101 | Unclassified | chr11:59784118-59852341   | 66.224  |
| <b>Upf2</b>          | 104 | 0  | 1.733416 | 551  | 9.183333 | 6.88259  | 24.33949 | Stalled      | chr2:5870514-5977749      | 105.236 |
| <b>Cnih3</b>         | 104 | 0  | 1.733416 | 136  | 2.266667 | 0.202951 | 1.321091 | Unclassified | chr1:183280758-183390772  | 108.015 |
| <b>Notch2</b>        | 104 | 0  | 1.733416 | 1932 | 32.2     | 9.01141  | 18.6553  | Stalled      | chr3:97815460-97954290    | 136.831 |
| <b>Kif5c</b>         | 104 | 62 | 1.733416 | 345  | 5.75     | 0.788529 | 1.855574 | Unclassified | chr2:49472833-49630298    | 155.466 |
| <b>Kank1</b>         | 104 | 0  | 1.733416 | 211  | 3.516667 | 0.078177 | 1.445848 | Unclassified | chr19:25309691-25508986   | 197.296 |
| <b>Map2k5</b>        | 104 | 0  | 1.733416 | 1350 | 22.5     | 13.767   | 23.17488 | Stalled      | chr9:63011576-63227659    | 214.084 |
| <b>Rps8</b>          | 103 | 0  | 1.716749 | 204  | 3.4      | 0        | 3.230806 | Stalled      | chr4:116826440-116830737  | 2.298   |
| <b>Mchr1</b>         | 103 | 0  | 1.716749 | 1    | 0.016667 | 0.241362 | 3.435897 | Unclassified | chr15:81064203-81068542   | 2.34    |
| <b>2810428I15Rik</b> | 103 | 0  | 1.716749 | 23   | 0.383333 | 26.9369  | 19.92084 | Stalled      | chr8:73028194-73032638    | 2.445   |
| <b>Fgfbp1</b>        | 103 | 0  | 1.716749 | 8    | 0.133333 | 0.066349 | 0.768982 | Unclassified | chr5:44370098-44375001    | 2.904   |
| <b>Rpl9</b>          | 103 | 0  | 1.716749 | 185  | 3.083333 | 0        | 6.09411  | Stalled      | chr5:65779602-65784670    | 3.069   |
| <b>1700020L24Rik</b> | 103 | 0  | 1.716749 | 52   | 0.866667 | 7.91365  | 0        | Stalled      | chr11:83249195-83254734   | 3.54    |
| <b>Rbmxrt</b>        | 103 | 0  | 1.716749 | 52   | 0.866667 | 27.6372  | 13.14411 | Stalled      | chr8:81029167-81034827    | 3.661   |
| <b>Dohh</b>          | 103 | 0  | 1.716749 | 106  | 1.766667 | 37.4809  | 6.576879 | Stalled      | chr10:80845172-80851095   | 3.924   |
| <b>Vwa1</b>          | 103 | 0  | 1.716749 | 106  | 1.766667 | 1.20805  | 0.228149 | Stalled      | chr4:155142603-155150670  | 6.068   |
| <b>Idi1</b>          | 103 | 0  | 1.716749 | 125  | 2.083333 | 28.2259  | 23.20169 | Stalled      | chr13:8883219-8891641     | 6.243   |
| <b>Ndufb2</b>        | 103 | 0  | 1.716749 | 102  | 1.7      | 35.3946  | 13.48438 | Stalled      | chr6:39540581-39549470    | 6.89    |
| <b>Ndufa4</b>        | 103 | 0  | 1.716749 | 67   | 1.116667 | 97.3956  | 24.857   | Stalled      | chr6:11850372-11859446    | 7.075   |
| <b>Nr2f6</b>         | 103 | 0  | 1.716749 | 130  | 2.166667 | 4.70259  | 1.248767 | Elongating   | chr8:73898017-73907851    | 7.835   |
| <b>Zfp146</b>        | 103 | 0  | 1.716749 | 153  | 2.55     | 10.6294  | 11.11285 | Stalled      | chr7:30946286-30956746    | 8.461   |

|               |     |    |          |      |          |          |          |              |                           |         |
|---------------|-----|----|----------|------|----------|----------|----------|--------------|---------------------------|---------|
| Ranbp1        | 103 | 0  | 1.716749 | 402  | 6.7      | 166.775  | 10.43456 | Stalled      | chr16:18240071-18250787   | 8.717   |
| Retsat        | 103 | 0  | 1.716749 | 244  | 4.066667 | 4.03501  | 4.182878 | Stalled      | chr6:72546621-72557482    | 8.862   |
| Pomgnt1       | 103 | 0  | 1.716749 | 126  | 2.1      | 5.75871  | 9.733607 | Stalled      | chr4:115821122-115832449  | 9.328   |
| Khk           | 103 | 0  | 1.716749 | 26   | 0.433333 | 5.32292  | 21.88368 | Stalled      | chr5:31222267-31233619    | 9.353   |
| Cacybp        | 103 | 0  | 1.716749 | 175  | 2.916667 | 41.0956  | 16.5734  | Stalled      | chr1:162133051-162144908  | 9.858   |
| Gm5113        | 103 | 0  | 1.716749 | 34   | 0.566667 | 2.73579  | 51.07029 | Stalled      | chr7:30952940-30965228    | 10.289  |
| Alg1          | 103 | 0  | 1.716749 | 203  | 3.383333 | 13.8281  | 12.49409 | Stalled      | chr16:5231713-5245001     | 11.289  |
| Kdelr3        | 103 | 0  | 1.716749 | 267  | 4.45     | 1.161    | 0.335295 | Stalled      | chr15:79344837-79358168   | 11.332  |
| Rpp14         | 103 | 0  | 1.716749 | 228  | 3.8      | 10.9544  | 9.450544 | Stalled      | chr14:8910826-8924359     | 11.534  |
| 4930444A02Rik | 103 | 0  | 1.716749 | 80   | 1.333333 | 1.25626  | 13.93721 | Stalled      | chr8:27091075-27106593    | 13.519  |
| Poir3f        | 103 | 0  | 1.716749 | 156  | 2.6      | 3.05276  | 11.87643 | Stalled      | chr2:144351480-144367515  | 14.036  |
| Tox4          | 103 | 0  | 1.716749 | 351  | 5.85     | 9.75588  | 9.939555 | Stalled      | chr14:52896820-52915184   | 16.365  |
| Hpn           | 103 | 0  | 1.716749 | 122  | 2.033333 | 1.20459  | 0.339478 | Stalled      | chr7:31883743-31902309    | 16.567  |
| Rab2b         | 103 | 0  | 1.716749 | 73   | 1.216667 | 14.7577  | 62.17739 | Stalled      | chr14:52881434-52901070   | 17.637  |
| Coil          | 103 | 0  | 1.716749 | 184  | 3.066667 | 6.02075  | 10.05721 | Stalled      | chr11:88833248-88852927   | 17.68   |
| Lias          | 103 | 0  | 1.716749 | 161  | 2.683333 | 8.84388  | 49.27685 | Stalled      | chr5:65780735-65800446    | 17.712  |
| Hdac3         | 103 | 0  | 1.716749 | 123  | 2.05     | 19.447   | 14.46419 | Stalled      | chr18:38096624-38116642   | 18.019  |
| Bnip3         | 103 | 0  | 1.716749 | 60   | 1        | 6.58643  | 22.29704 | Stalled      | chr7:146082518-146103189  | 18.672  |
| Mcee          | 103 | 0  | 1.716749 | 51   | 0.85     | 6.75701  | 29.63518 | Stalled      | chr7:71535656-71557005    | 19.35   |
| Aph1b         | 103 | 0  | 1.716749 | 9    | 0.15     | 0.989455 | 23.04718 | Stalled      | chr9:66623293-66645230    | 19.938  |
| Zfp444        | 103 | 0  | 1.716749 | 231  | 3.85     | 3.37345  | 13.3699  | Stalled      | chr7:6122114-6144706      | 20.593  |
| Rnpep         | 103 | 0  | 1.716749 | 284  | 4.733333 | 24.9837  | 10.381   | Stalled      | chr1:137159276-137182661  | 21.386  |
| Aldh3a2       | 103 | 0  | 1.716749 | 221  | 3.683333 | 8.87601  | 28.21953 | Stalled      | chr11:61058256-61082629   | 22.374  |
| Usp30         | 103 | 0  | 1.716749 | 290  | 4.833333 | 5.04308  | 3.534235 | Stalled      | chr5:114548341-114572933  | 22.593  |
| Rab23         | 103 | 0  | 1.716749 | 205  | 3.416667 | 2.39977  | 11.47123 | Stalled      | chr1:33774740-33799407    | 22.668  |
| Fam134c       | 103 | 0  | 1.716749 | 188  | 3.133333 | 13.6422  | 35.17185 | Stalled      | chr11:100957635-100983138 | 23.504  |
| Zfp426        | 103 | 0  | 1.716749 | 195  | 3.25     | 7.41636  | 25.19793 | Stalled      | chr9:20272992-20299190    | 24.199  |
| Wdr3          | 103 | 0  | 1.716749 | 283  | 4.716667 | 10.4677  | 24.41948 | Stalled      | chr3:99942104-99968326    | 24.223  |
| Ccnt1         | 103 | 0  | 1.716749 | 534  | 8.9      | 13.5997  | 22.02216 | Stalled      | chr15:98373641-98400067   | 24.427  |
| Rpia          | 103 | 0  | 1.716749 | 206  | 3.433333 | 30.1483  | 15.83797 | Stalled      | chr6:70715713-70744169    | 26.457  |
| BC060267      | 103 | 0  | 1.716749 | 297  | 4.95     | 0.296418 | 1.566384 | Elongating   | chr6:115760746-115790430  | 27.685  |
| Stab1         | 103 | 0  | 1.716749 | 86   | 1.433333 | 0.096658 | 2.247605 | Unclassified | chr14:31952202-31983827   | 29.626  |
| Fam65c        | 103 | 0  | 1.716749 | 196  | 3.266667 | 0.065501 | 0.384446 | Stalled      | chr2:167806285-167838093  | 29.809  |
| Pi4kb         | 103 | 0  | 1.716749 | 927  | 15.45    | 13.7119  | 8.215976 | Stalled      | chr3:94776652-94810765    | 32.114  |
| Stk30         | 103 | 0  | 1.716749 | 155  | 2.583333 | 1.52897  | 1.88932  | Unclassified | chr12:112046007-112081149 | 33.143  |
| Cog4          | 103 | 0  | 1.716749 | 491  | 8.183333 | 11.9774  | 23.12449 | Stalled      | chr8:113368923-113406134  | 35.212  |
| Myb           | 103 | 0  | 1.716749 | 350  | 5.833333 | 3.24874  | 10.56079 | Stalled      | chr10:20844735-20882790   | 36.056  |
| Sf3b3         | 103 | 0  | 1.716749 | 1381 | 23.01667 | 35.9318  | 9.449625 | Stalled      | chr8:113334391-113372703  | 36.313  |
| Nktr          | 103 | 0  | 1.716749 | 854  | 14.23333 | 16.2319  | 13.46018 | Stalled      | chr9:121626298-121665959  | 37.662  |
| Ift172        | 103 | 0  | 1.716749 | 175  | 2.916667 | 1.93343  | 14.95447 | Stalled      | chr5:31555652-31595487    | 37.836  |
| Smyd2         | 103 | 0  | 1.716749 | 748  | 12.46667 | 11.9446  | 4.396347 | Stalled      | chr1:191704370-191748167  | 41.798  |
| Gdap2         | 103 | 0  | 1.716749 | 295  | 4.916667 | 4.73532  | 41.73585 | Stalled      | chr3:99964440-100010904   | 44.465  |
| Gopc          | 103 | 0  | 1.716749 | 169  | 2.816667 | 7.27811  | 55.56306 | Stalled      | chr10:52056887-52103881   | 44.995  |
| Gnaz          | 103 | 0  | 1.716749 | 395  | 6.583333 | 7.66224  | 4.628653 | Stalled      | chr10:74427975-74478622   | 48.648  |
| Fam3c         | 103 | 0  | 1.716749 | 974  | 16.23333 | 10.3029  | 10.21026 | Stalled      | chr6:22256521-22308081    | 49.561  |
| 6330439K17Rik | 103 | 0  | 1.716749 | 55   | 0.916667 | 0.138787 | 70.02857 | Stalled      | chr2:144296292-144355134  | 56.843  |
| Rad50         | 103 | 0  | 1.716749 | 519  | 8.65     | 7.77838  | 46.1675  | Stalled      | chr11:53463020-53522821   | 57.802  |
| Irak3         | 103 | 0  | 1.716749 | 272  | 4.533333 | 4.02725  | 23.84693 | Stalled      | chr10:119578709-119640593 | 59.885  |
| Usp40         | 103 | 0  | 1.716749 | 670  | 11.16667 | 1.61674  | 7.842017 | Stalled      | chr1:89841695-89907126    | 63.432  |
| Pik3r1        | 103 | 0  | 1.716749 | 701  | 11.68333 | 4.22338  | 31.72975 | Stalled      | chr13:102450717-102540172 | 67.456  |
| Slc24a4       | 103 | 0  | 1.716749 | 242  | 4.033333 | 0.055137 | 1.441401 | Unclassified | chr12:103365628-103504959 | 137.332 |
| Ica1          | 103 | 0  | 1.716749 | 319  | 5.316667 | 1.01261  | 1.576952 | Unclassified | chr6:8580526-8730484      | 147.959 |
| Sorbs1        | 103 | 0  | 1.716749 | 543  | 9.05     | 1.00975  | 38.14615 | Stalled      | chr19:40366529-40590226   | 221.698 |
| Baz2b         | 103 | 0  | 1.716749 | 1509 | 25.15    | 5.00277  | 10.91563 | Stalled      | chr2:59737419-59965797    | 226.379 |
| Gm10941       | 102 | 0  | 1.700081 | 2    | 0.033333 | 6.99465  | 39.12245 | Unclassified | chr10:76720519-76723968   | 1.45    |
| Rag1ap1       | 102 | 0  | 1.700081 | 62   | 1.033333 | 22.0405  | 4.460064 | Stalled      | chr3:89072167-89076492    | 2.326   |
| Haghl         | 102 | 0  | 1.700081 | 50   | 0.833333 | 12.7914  | 5.74568  | Stalled      | chr17:25919769-25924278   | 2.51    |
| Ubxn1         | 102 | 0  | 1.700081 | 80   | 1.333333 | 85.9316  | 7.011059 | Stalled      | chr19:8944048-8950146     | 4.099   |
| Zbtb45        | 102 | 0  | 1.700081 | 66   | 1.1      | 5.49036  | 9.253414 | Stalled      | chr7:13591014-13597149    | 4.136   |
| Alg2          | 102 | 0  | 1.700081 | 50   | 0.833333 | 10.0872  | 23.7116  | Stalled      | chr4:47482704-47489239    | 4.536   |
| Rpl23         | 102 | 0  | 1.700081 | 441  | 7.35     | 421.712  | 4.373318 | Stalled      | chr11:97638839-97645753   | 4.915   |
| Slc32a1       | 102 | 0  | 1.700081 | 17   | 0.283333 | 0.292422 | 0.950646 | Unclassified | chr2:158434493-158441483  | 4.991   |
| Il27          | 102 | 0  | 1.700081 | 16   | 0.266667 | 0.290867 | 1.56759  | Unclassified | chr7:133732808-133740424  | 5.617   |
| Mrps14        | 102 | 0  | 1.700081 | 96   | 1.6      | 13.1906  | 9.765377 | Stalled      | chr1:162123390-162131317  | 5.928   |
| Mad211bp      | 102 | 0  | 1.700081 | 36   | 0.6      | 16.021   | 30.75072 | Stalled      | chr17:46284334-46292500   | 6.167   |
| Plekhhf1      | 102 | 0  | 1.700081 | 31   | 0.516667 | 1.923    | 11.88849 | Stalled      | chr7:39005672-39015013    | 7.342   |
| Pofut2        | 102 | 0  | 1.700081 | 189  | 3.15     | 8.04414  | 9.883442 | Stalled      | chr10:76720044-76732331   | 10.288  |
| Prkrir        | 102 | 0  | 1.700081 | 145  | 2.416667 | 9.27096  | 22.35854 | Stalled      | chr7:105849872-105866571  | 14.7    |
| Metrn1        | 102 | 0  | 1.700081 | 42   | 0.7      | 1.568    | 10.97877 | Stalled      | chr11:121561740-121578703 | 14.964  |
| Nfyb          | 102 | 0  | 1.700081 | 306  | 5.1      | 7.41146  | 15.14418 | Stalled      | chr10:82211444-82228886   | 15.443  |
| Dusp11        | 102 | 0  | 1.700081 | 314  | 5.233333 | 7.36349  | 18.67953 | Stalled      | chr6:85892264-85913689    | 19.426  |
| Tmem143       | 102 | 0  | 1.700081 | 182  | 3.033333 | 6.39191  | 24.69342 | Stalled      | chr7:53150438-53172783    | 20.346  |
| Rsrc2         | 102 | 0  | 1.700081 | 465  | 7.75     | 15.8601  | 13.02093 | Stalled      | chr5:124178438-124201421  | 20.984  |
| Mfsd1         | 102 | 0  | 1.700081 | 130  | 2.166667 | 12.4441  | 17.13747 | Stalled      | chr3:67384689-67408153    | 21.465  |
| Lgals8        | 102 | 59 | 1.700081 | 395  | 6.583333 | 4.17177  | 9.471057 | Stalled      | chr13:12531685-12555757   | 22.073  |
| 4931414P19Rik | 102 | 0  | 1.700081 | 413  | 6.883333 | 2.24084  | 5.333193 | Stalled      | chr14:55202499-55226745   | 22.247  |
| Azi2          | 102 | 0  | 1.700081 | 161  | 2.683333 | 5.7679   | 31.5238  | Stalled      | chr9:117947616-117973025  | 23.41   |
| Pdia3         | 102 | 0  | 1.700081 | 593  | 9.883333 | 140.549  | 20.7091  | Stalled      | chr2:121237637-121264422  | 24.786  |
| Aldh4a1       | 102 | 0  | 1.700081 | 104  | 1.733333 | 6.26954  | 31.40329 | Stalled      | chr4:139176808-139205605  | 26.798  |
| 2810403A07Rik | 102 | 0  | 1.700081 | 549  | 9.15     | 13.9388  | 15.58871 | Stalled      | chr3:88487715-88516853    | 27.139  |
| Pcx           | 102 | 0  | 1.700081 | 231  | 3.85     | 2.04508  | 0.308058 | Stalled      | chr19:4592318-4621752     | 27.435  |
| Zfp1          | 102 | 0  | 1.700081 | 326  | 5.433333 | 6.17101  | 16.73012 | Stalled      | chr8:114165342-114194911  | 27.57   |
| Zfp346        | 102 | 0  | 1.700081 | 443  | 7.383333 | 5.38655  | 15.48668 | Stalled      | chr13:55204669-55236432   | 29.764  |
| Ctsp          | 102 | 0  | 1.700081 | 688  | 11.46667 | 13.2039  | 16.76683 | Stalled      | chr4:120212472-120244801  | 30.41   |
| Polh          | 102 | 0  | 1.700081 | 220  | 3.666667 | 10.0487  | 37.51229 | Stalled      | chr17:46308941-46341574   | 30.634  |
| Cand2         | 102 | 0  | 1.700081 | 1001 | 16.68333 | 3.1888   | 0.960233 | Stalled      | chr6:115722574-115755573  | 31      |

|                      |     |    |          |      |          |          |          |              |                           |         |
|----------------------|-----|----|----------|------|----------|----------|----------|--------------|---------------------------|---------|
| <b>Heatr2</b>        | 102 | 0  | 1.700081 | 414  | 6.9      | 6.45765  | 6.989512 | Stalled      | chr5:139624176-139662459  | 36.284  |
| <b>Baz2a</b>         | 102 | 0  | 1.700081 | 638  | 10.63333 | 16.6219  | 6.170658 | Stalled      | chr10:127527838-127566359 | 36.522  |
| <b>Ptgis</b>         | 102 | 0  | 1.700081 | 99   | 1.65     | 0.212264 | 0.805575 | Unclassified | chr2:167028695-167068037  | 37.343  |
| <b>Npat</b>          | 102 | 0  | 1.700081 | 328  | 5.466667 | 3.30966  | 30.63454 | Stalled      | chr9:53343151-53383732    | 38.582  |
| <b>Aspm</b>          | 102 | 0  | 1.700081 | 331  | 5.516667 | 4.70519  | 13.79888 | Stalled      | chr1:141349349-141390665  | 39.317  |
| <b>Xpo5</b>          | 102 | 0  | 1.700081 | 653  | 10.88333 | 9.83061  | 19.294   | Stalled      | chr17:46337803-46379248   | 39.446  |
| <b>Srl</b>           | 102 | 0  | 1.700081 | 305  | 5.083333 | 0.774881 | 1.085391 | Stalled      | chr16:4480227-4525053     | 42.827  |
| <b>Gmps</b>          | 102 | 0  | 1.700081 | 293  | 4.883333 | 7.72546  | 29.67444 | Stalled      | chr3:63778064-63823000    | 42.937  |
| <b>Mtf2</b>          | 102 | 0  | 1.700081 | 401  | 6.683333 | 9.01201  | 36.80246 | Stalled      | chr5:108492760-108538021  | 43.262  |
| <b>Apf</b>           | 102 | 0  | 1.700081 | 58   | 0.966667 | 3.68817  | 53.88181 | Stalled      | chr6:87578422-87624162    | 43.741  |
| <b>Setd7</b>         | 102 | 0  | 1.700081 | 716  | 11.93333 | 4.31562  | 11.2949  | Stalled      | chr3:51319239-51366745    | 45.507  |
| <b>Elfn2</b>         | 102 | 0  | 1.700081 | 128  | 2.133333 | 0.121282 | 0.807068 | Unclassified | chr15:78500436-78550543   | 48.108  |
| <b>Csnk2a1</b>       | 102 | 0  | 1.700081 | 657  | 10.95    | 11.8639  | 34.33675 | Stalled      | chr2:152050575-152107587  | 55.013  |
| <b>Orc5l</b>         | 102 | 0  | 1.700081 | 308  | 5.133333 | 4.64869  | 55.92249 | Stalled      | chr5:21992306-22058149    | 63.844  |
| <b>Kntc1</b>         | 102 | 0  | 1.700081 | 495  | 8.25     | 4.1623   | 34.56603 | Stalled      | chr5:124197734-124271602  | 71.869  |
| <b>Stam</b>          | 102 | 0  | 1.700081 | 214  | 3.566667 | 3.37567  | 43.08258 | Stalled      | chr2:13993738-14069957    | 74.22   |
| <b>Atm</b>           | 102 | 0  | 1.700081 | 745  | 12.41667 | 6.32482  | 34.23082 | Stalled      | chr9:53245226-53346776    | 99.551  |
| <b>Eftud1</b>        | 102 | 48 | 1.700081 | 2244 | 37.4     | 14.4887  | 13.35248 | Stalled      | chr7:89795123-89926362    | 129.24  |
| <b>Ccdc91</b>        | 102 | 0  | 1.700081 | 298  | 4.966667 | 3.51724  | 53.20229 | Stalled      | chr6:147422392-147581134  | 156.743 |
| <b>Tns3</b>          | 102 | 0  | 1.700081 | 1026 | 17.1     | 2.3733   | 3.686903 | Stalled      | chr11:8331654-8566538     | 232.885 |
| <b>Col23a1</b>       | 102 | 0  | 1.700081 | 500  | 8.333333 | 0.253385 | 4.064374 | Unclassified | chr11:51101421-51397427   | 294.007 |
| <b>Kirrel3</b>       | 102 | 0  | 1.700081 | 544  | 9.066667 | 0.173287 | 2.004722 | Unclassified | chr9:34294315-34843889    | 547.575 |
| <b>Sf3b5</b>         | 101 | 0  | 1.683414 | 0    | 0        | 104.94   | 200      | Unclassified | chr10:12726255-12728988   | 0.734   |
| <b>Rfp136al</b>      | 101 | 0  | 1.683414 | 8    | 0.133333 | 244.405  | 22.25861 | Unclassified | chr12:70283722-70287054   | 1.333   |
| <b>Tbcc</b>          | 101 | 0  | 1.683414 | 21   | 0.35     | 15.8236  | 10.74126 | Unclassified | chr17:47025569-47029412   | 1.844   |
| <b>Mgat2</b>         | 101 | 0  | 1.683414 | 55   | 0.916667 | 47.9348  | 15.4797  | Stalled      | chr12:70283144-70287760   | 2.617   |
| <b>Socs3</b>         | 101 | 0  | 1.683414 | 544  | 9.066667 | 30.8679  | 1.731322 | Elongating   | chr11:117827402-117832680 | 3.279   |
| <b>Tmem101</b>       | 101 | 0  | 1.683414 | 17   | 0.283333 | 11.3928  | 8.069278 | Stalled      | chr11:102013860-102019721 | 3.862   |
| <b>Hspa8</b>         | 101 | 0  | 1.683414 | 255  | 4.25     | 169.441  | 6.209547 | Stalled      | chr9:40607355-40613282    | 3.928   |
| <b>Hspb7</b>         | 101 | 0  | 1.683414 | 34   | 0.566667 | 0.106494 | 0.753044 | Unclassified | chr4:140974693-140981225  | 4.533   |
| <b>Slc2a4</b>        | 101 | 0  | 1.683414 | 10   | 0.166667 | 0.48557  | 2.962163 | Unclassified | chr11:69755787-69763692   | 5.906   |
| <b>Fbxo5</b>         | 101 | 0  | 1.683414 | 130  | 2.166667 | 10.2884  | 15.81216 | Stalled      | chr10:4539075-4547383     | 6.309   |
| <b>Sfrs7</b>         | 101 | 0  | 1.683414 | 296  | 4.933333 | 42.9994  | 12.07687 | Stalled      | chr17:80599419-80608625   | 7.207   |
| <b>Mrpl23</b>        | 101 | 0  | 1.683414 | 144  | 2.4      | 17.0688  | 9.283176 | Stalled      | chr7:149717021-149726647  | 7.627   |
| <b>Rccd1</b>         | 101 | 0  | 1.683414 | 270  | 4.5      | 11.8107  | 7.087489 | Stalled      | chr7:87461523-87471310    | 7.788   |
| <b>Dnase1l1</b>      | 101 | 0  | 1.683414 | 570  | 9.5      | 1.72809  | 0.87242  | Stalled      | chrX:71518556-71529075    | 8.52    |
| <b>Abcb6</b>         | 101 | 0  | 1.683414 | 149  | 2.483333 | 10.2284  | 6.782998 | Stalled      | chr1:75168214-75178857    | 8.644   |
| <b>Timm22</b>        | 101 | 0  | 1.683414 | 99   | 1.65     | 7.67463  | 9.609426 | Stalled      | chr11:76218691-76229794   | 9.104   |
| <b>Nolc1</b>         | 101 | 0  | 1.683414 | 505  | 8.416667 | 44.3112  | 6.598761 | Stalled      | chr19:46148352-46160020   | 9.669   |
| <b>Rmnd5b</b>        | 101 | 0  | 1.683414 | 768  | 12.8     | 10.5626  | 2.405692 | Elongating   | chr11:51437174-51451398   | 12.225  |
| <b>Zfp12</b>         | 101 | 0  | 1.683414 | 101  | 1.683333 | 3.1366   | 19.82157 | Stalled      | chr5:143994886-144009649  | 12.764  |
| <b>1190002H23Rik</b> | 101 | 0  | 1.683414 | 125  | 2.083333 | 5.88817  | 11.72314 | Stalled      | chr14:79688556-79703442   | 12.887  |
| <b>Mmab</b>          | 101 | 0  | 1.683414 | 108  | 1.8      | 8.71727  | 24.09096 | Stalled      | chr5:114881042-114896036  | 12.995  |
| <b>Zfp622</b>        | 101 | 0  | 1.683414 | 218  | 3.633333 | 31.4223  | 16.85739 | Stalled      | chr15:25912120-25928237   | 14.118  |
| <b>Zfp110</b>        | 101 | 0  | 1.683414 | 190  | 3.166667 | 5.63841  | 16.2353  | Stalled      | chr7:13418158-13435933    | 15.776  |
| <b>Mvk</b>           | 101 | 0  | 1.683414 | 300  | 5        | 21.458   | 10.90867 | Stalled      | chr5:114892314-114910599  | 16.286  |
| <b>Ccdc47</b>        | 101 | 0  | 1.683414 | 126  | 2.1      | 14.6194  | 36.4206  | Stalled      | chr11:106060669-106079681 | 17.013  |
| <b>Snrpd3</b>        | 101 | 0  | 1.683414 | 371  | 6.183333 | 105.591  | 11.43005 | Stalled      | chr10:74978786-74998185   | 17.4    |
| <b>Brpf1</b>         | 101 | 0  | 1.683414 | 417  | 6.95     | 16.1127  | 8.873165 | Stalled      | chr6:113255190-113274698  | 17.509  |
| <b>Ttc1</b>          | 101 | 0  | 1.683414 | 209  | 3.483333 | 13.6198  | 17.49699 | Stalled      | chr11:43543507-43563475   | 17.969  |
| <b>2410066E13Rik</b> | 101 | 0  | 1.683414 | 52   | 0.866667 | 9.98824  | 4.558677 | Stalled      | chr6:54629765-54650400    | 18.636  |
| <b>mmu-mir-99b,r</b> | 101 | 0  | 1.683414 | 234  | 3.9      | ND       | ND       | Stalled      | chr17:17957681-17978695   | 21.015  |
| <b>Slc30a4</b>       | 101 | 59 | 1.683414 | 106  | 1.766667 | 6.78934  | 14.7024  | Stalled      | chr2:122506974-122530399  | 21.426  |
| <b>Haus8</b>         | 101 | 0  | 1.683414 | 114  | 1.9      | 6.95625  | 47.03238 | Stalled      | chr8:73775023-73798489    | 21.467  |
| <b>Sfxn2</b>         | 101 | 0  | 1.683414 | 98   | 1.633333 | 2.6329   | 25.0542  | Stalled      | chr19:46645854-46671390   | 23.537  |
| <b>Ube2v1</b>        | 101 | 0  | 1.683414 | 1009 | 16.81667 | 21.1094  | 4.36862  | Stalled      | chr2:167433138-167459505  | 24.368  |
| <b>B230208H17Rik</b> | 101 | 0  | 1.683414 | 547  | 9.116667 | 23.8914  | 8.464974 | Stalled      | chr2:25438537-25465966    | 25.43   |
| <b>Rangap1</b>       | 101 | 0  | 1.683414 | 1582 | 26.36667 | 68.1381  | 3.731649 | Stalled      | chr15:81534677-81562349   | 25.673  |
| <b>Prcd</b>          | 101 | 58 | 1.683414 | 269  | 4.483333 | 26.4706  | 10.53709 | Stalled      | chr3:87662825-87691484    | 26.66   |
| <b>Card10</b>        | 101 | 0  | 1.683414 | 72   | 1.2      | 0.246601 | 2.448457 | Unclassified | chr15:78605565-78635472   | 27.908  |
| <b>C77080</b>        | 101 | 0  | 1.683414 | 411  | 6.85     | 0.844889 | 0.063498 | Stalled      | chr4:128896821-128927687  | 28.867  |
| <b>Ddx42</b>         | 101 | 0  | 1.683414 | 462  | 7.7      | 20.7108  | 28.6707  | Stalled      | chr11:106076239-106110454 | 32.216  |
| <b>Brms11</b>        | 101 | 0  | 1.683414 | 319  | 5.316667 | 7.29133  | 27.36193 | Stalled      | chr12:56935352-56970722   | 33.371  |
| <b>Vapa</b>          | 101 | 0  | 1.683414 | 386  | 6.433333 | 30.2421  | 41.62839 | Stalled      | chr17:65929393-65964895   | 33.503  |
| <b>Hcd4</b>          | 101 | 0  | 1.683414 | 986  | 16.43333 | 81.3922  | 6.737732 | Stalled      | chr6:125044180-125080519  | 34.34   |
| <b>Hadh</b>          | 101 | 0  | 1.683414 | 227  | 3.783333 | 8.06195  | 12.36704 | Stalled      | chr3:130936341-130976955  | 38.615  |
| <b>Gnai3</b>         | 101 | 0  | 1.683414 | 374  | 6.233333 | 21.068   | 37.37466 | Stalled      | chr3:107910216-107951032  | 38.817  |
| <b>Pitpna</b>        | 101 | 0  | 1.683414 | 1032 | 17.2     | 61.9887  | 11.14266 | Stalled      | chr11:75399609-75442280   | 40.672  |
| <b>Arl3</b>          | 101 | 0  | 1.683414 | 153  | 2.55     | 23.1808  | 27.25135 | Stalled      | chr19:46605598-46649575   | 41.978  |
| <b>Dcp1a</b>         | 101 | 0  | 1.683414 | 530  | 8.833333 | 8.03208  | 22.74273 | Stalled      | chr14:31290750-31340242   | 47.493  |
| <b>Itk</b>           | 101 | 0  | 1.683414 | 238  | 3.966667 | 0.434844 | 0.210265 | Unclassified | chr11:46138651-46205017   | 64.367  |
| <b>Ppa2</b>          | 101 | 0  | 1.683414 | 366  | 6.1      | 5.99983  | 26.9085  | Stalled      | chr3:132971079-133041033  | 67.955  |
| <b>Ap1g1</b>         | 101 | 0  | 1.683414 | 786  | 13.1     | 10.1249  | 29.43312 | Stalled      | chr8:112300539-112384835  | 82.297  |
| <b>Bcat1</b>         | 101 | 0  | 1.683414 | 1461 | 24.35    | 2.92833  | 8.489145 | Stalled      | chr6:144942355-145026677  | 82.323  |
| <b>Fbrs11</b>        | 101 | 0  | 1.683414 | 1148 | 19.13333 | 6.9973   | 14.45721 | Stalled      | chr5:110790770-110879522  | 86.753  |
| <b>Nup93</b>         | 101 | 0  | 1.683414 | 936  | 15.6     | 14.4467  | 23.43865 | Stalled      | chr8:96736500-96838966    | 100.467 |
| <b>Gtf2f2</b>        | 101 | 0  | 1.683414 | 948  | 15.8     | 17.2605  | 16.17954 | Stalled      | chr14:76296743-76412672   | 113.93  |
| <b>Cacna2d4</b>      | 101 | 0  | 1.683414 | 408  | 6.8      | 0.359935 | 0.439421 | Unclassified | chr6:119184543-119302425  | 115.883 |
| <b>493045I11Rik</b>  | 100 | 0  | 1.666747 | 0    | 0        | 0        | 5        | Unclassified | chr7:133973987-133977010  | 1.024   |
| <b>Hes5</b>          | 100 | 0  | 1.666747 | 72   | 1.2      | 11.3531  | 0.329193 | Elongating   | chr4:154333031-154336480  | 1.45    |
| <b>Tmem141</b>       | 100 | 0  | 1.666747 | 1    | 0.016667 | 1.61571  | 5.81762  | Unclassified | chr2:25475585-25479525    | 1.941   |
| <b>Gng3</b>          | 100 | 0  | 1.666747 | 244  | 4.066667 | 5.01259  | 0.166677 | Stalled      | chr19:8911418-8915736     | 2.319   |
| <b>Nrarp</b>         | 100 | 0  | 1.666747 | 10   | 0.166667 | 4.53314  | 19.6047  | Stalled      | chr2:25034277-25038852    | 2.576   |
| <b>Nrpl52</b>        | 100 | 0  | 1.666747 | 55   | 0.916667 | 50.727   | 8.202927 | Stalled      | chr14:55043745-55048587   | 2.843   |
| <b>Stoml2</b>        | 100 | 0  | 1.666747 | 52   | 0.866667 | 29.6056  | 10.35103 | Stalled      | chr4:43040561-43046256    | 3.696   |
| <b>Fdxacb1</b>       | 100 | 0  | 1.666747 | 59   | 0.983333 | 3.82755  | 10.17539 | Stalled      | chr9:50574342-50580775    | 4.434   |

|                      |     |    |          |      |          |          |          |              |                           |         |
|----------------------|-----|----|----------|------|----------|----------|----------|--------------|---------------------------|---------|
| <b>Snai1</b>         | 100 | 0  | 1.666747 | 47   | 0.783333 | 3.76524  | 11.83849 | Stalled      | chr2:167361726-167368311  | 4.586   |
| <b>A430005L14Rik</b> | 100 | 0  | 1.666747 | 75   | 1.25     | 4.68771  | 7.497045 | Stalled      | chr4:153329345-153336031  | 4.687   |
| <b>1110032A03Rik</b> | 100 | 0  | 1.666747 | 21   | 0.35     | 5.87415  | 30.91708 | Stalled      | chr9:50570932-50578257    | 5.326   |
| <b>Orai3</b>         | 100 | 0  | 1.666747 | 172  | 2.866667 | 13.5248  | 6.714422 | Stalled      | chr7:134911328-134918664  | 5.337   |
| <b>Cks2</b>          | 100 | 0  | 1.666747 | 113  | 1.883333 | 23.2589  | 13.66224 | Stalled      | chr13:51738600-51746031   | 5.432   |
| <b>Mmachc</b>        | 100 | 0  | 1.666747 | 94   | 1.566667 | 4.19648  | 6.657191 | Stalled      | chr4:116375038-116382990  | 5.953   |
| <b>6330545A04Rik</b> | 100 | 0  | 1.666747 | 28   | 0.466667 | 1.95374  | 5.290712 | Stalled      | chr4:140767870-140776029  | 6.16    |
| <b>Ccdc163</b>       | 100 | 0  | 1.666747 | 22   | 0.366667 | 4.99263  | 14.0942  | Stalled      | chr4:116379534-116387709  | 6.176   |
| <b>Ccng1</b>         | 100 | 0  | 1.666747 | 80   | 1.333333 | 27.9473  | 17.5286  | Stalled      | chr11:40562053-40570788   | 6.736   |
| <b>Lrrc46</b>        | 100 | 0  | 1.666747 | 29   | 0.483333 | 3.21862  | 27.87518 | Stalled      | chr11:96895915-96904683   | 6.769   |
| <b>Mapk11</b>        | 100 | 0  | 1.666747 | 74   | 1.233333 | 9.40085  | 3.668713 | Stalled      | chr15:88972913-88982036   | 7.124   |
| <b>Mrpl10</b>        | 100 | 0  | 1.666747 | 171  | 2.85     | 16.3931  | 6.568207 | Stalled      | chr11:96900899-96910527   | 7.629   |
| <b>Ing2</b>          | 100 | 0  | 1.666747 | 226  | 3.766667 | 6.73936  | 12.01716 | Stalled      | chr8:48752531-48762512    | 7.982   |
| <b>5730577I03Rik</b> | 100 | 0  | 1.666747 | 23   | 0.383333 | 3.91003  | 67.90603 | Stalled      | chr9:20409918-20420351    | 8.434   |
| <b>Decr2</b>         | 100 | 0  | 1.666747 | 26   | 0.433333 | 3.28305  | 10.30835 | Stalled      | chr17:26218155-26229109   | 8.955   |
| <b>Ncbp2</b>         | 100 | 0  | 1.666747 | 190  | 3.166667 | 20.7591  | 14.04762 | Stalled      | chr16:31946631-31958558   | 9.928   |
| <b>Bscl2</b>         | 100 | 0  | 1.666747 | 240  | 4        | 10.6391  | 9.146493 | Stalled      | chr19:8909956-8923172     | 11.217  |
| <b>Gpatch4</b>       | 100 | 0  | 1.666747 | 280  | 4.666667 | 27.5441  | 8.87726  | Stalled      | chr3:87845029-87859914    | 12.886  |
| <b>Atf3</b>          | 100 | 0  | 1.666747 | 223  | 3.716667 | 4.48146  | 11.37023 | Stalled      | chr1:192994175-193009212  | 13.038  |
| <b>3230401D17Rik</b> | 100 | 0  | 1.666747 | 131  | 2.183333 | 4.652    | 21.31082 | Stalled      | chr2:163231557-163247206  | 13.65   |
| <b>Drg2</b>          | 100 | 0  | 1.666747 | 406  | 6.766667 | 17.2605  | 4.778854 | Stalled      | chr11:60266118-60282207   | 14.09   |
| <b>Pdc1</b>          | 100 | 0  | 1.666747 | 127  | 2.116667 | 2.63905  | 3.306143 | Stalled      | chr1:95934883-95951130    | 14.248  |
| <b>Bud13</b>         | 100 | 0  | 1.666747 | 167  | 2.783333 | 9.80343  | 20.64301 | Stalled      | chr9:46089094-46106866    | 15.773  |
| <b>Ctns</b>          | 100 | 0  | 1.666747 | 67   | 1.116667 | 2.57083  | 20.54445 | Stalled      | chr11:72996634-73014521   | 15.888  |
| <b>Ntan1</b>         | 100 | 0  | 1.666747 | 461  | 7.683333 | 14.5539  | 8.222082 | Stalled      | chr16:13817369-13835543   | 16.175  |
| <b>Rg9mtd2</b>       | 100 | 0  | 1.666747 | 110  | 1.833333 | 6.24866  | 63.07133 | Stalled      | chr3:137804501-137822784  | 16.284  |
| <b>1700030K09Rik</b> | 100 | 0  | 1.666747 | 495  | 8.25     | 9.19466  | 3.680399 | Stalled      | chr8:74965778-74984439    | 16.662  |
| <b>Ints12</b>        | 100 | 0  | 1.666747 | 112  | 1.866667 | 2.55027  | 64.76674 | Stalled      | chr3:132752916-132773949  | 19.034  |
| <b>Calr3</b>         | 100 | 0  | 1.666747 | 57   | 0.95     | 1.16278  | 30.50423 | Stalled      | chr8:74948081-74969677    | 19.597  |
| <b>Wee1</b>          | 100 | 0  | 1.666747 | 284  | 4.733333 | 10.3781  | 16.50008 | Stalled      | chr7:117263572-117286813  | 21.242  |
| <b>Stradb</b>        | 100 | 0  | 1.666747 | 50   | 0.833333 | 4.53439  | 81.85611 | Stalled      | chr1:59028414-59051965    | 21.552  |
| <b>Sic12a4</b>       | 100 | 0  | 1.666747 | 171  | 2.85     | 5.09206  | 10.36469 | Stalled      | chr8:108467492-108491939  | 22.448  |
| <b>Gtf2h2</b>        | 100 | 0  | 1.666747 | 137  | 2.283333 | 8.39301  | 19.8626  | Stalled      | chr13:101238531-101264564 | 24.034  |
| <b>Tmem72</b>        | 100 | 0  | 1.666747 | 49   | 0.816667 | 0.115076 | 0.63955  | Unclassified | chr6:116642742-116668776  | 24.035  |
| <b>Shpk</b>          | 100 | 0  | 1.666747 | 57   | 0.95     | 2.60318  | 38.8444  | Stalled      | chr11:73010983-73038008   | 25.026  |
| <b>Fxyd6</b>         | 100 | 0  | 1.666747 | 38   | 0.633333 | 0.47203  | 2.776169 | Unclassified | chr9:45176267-45204242    | 25.976  |
| <b>Incenp</b>        | 100 | 0  | 1.666747 | 963  | 16.05    | 59.0684  | 8.964925 | Stalled      | chr19:9946786-9976023     | 27.238  |
| <b>Zdhhc5</b>        | 100 | 0  | 1.666747 | 294  | 4.9      | 9.25191  | 28.5206  | Stalled      | chr2:84528076-84557321    | 27.246  |
| <b>Rnf141</b>        | 100 | 0  | 1.666747 | 141  | 2.35     | 2.95023  | 19.03456 | Stalled      | chr7:117960048-117989895  | 27.848  |
| <b>D230025D16Rik</b> | 100 | 0  | 1.666747 | 173  | 2.883333 | 5.18324  | 45.43252 | Stalled      | chr8:107747087-107776951  | 27.865  |
| <b>Gm572</b>         | 100 | 0  | 1.666747 | 64   | 1.066667 | 0.111044 | 1.194736 | Unclassified | chr4:148015425-148045681  | 28.257  |
| <b>Suclg1</b>        | 100 | 0  | 1.666747 | 335  | 5.583333 | 40.3036  | 12.92968 | Stalled      | chr6:73196498-73226899    | 28.402  |
| <b>Btla</b>          | 100 | 58 | 1.666747 | 456  | 7.6      | 8.77014  | 5.300438 | Stalled      | chr16:45222449-45253008   | 28.56   |
| <b>Wdr91</b>         | 100 | 0  | 1.666747 | 326  | 5.433333 | 9.52355  | 11.91481 | Stalled      | chr6:34830425-34862831    | 30.407  |
| <b>Cat</b>           | 100 | 0  | 1.666747 | 179  | 2.983333 | 15.5469  | 35.99743 | Stalled      | chr2:103294060-103327310  | 31.251  |
| <b>Rnf185</b>        | 100 | 0  | 1.666747 | 212  | 3.533333 | 5.13822  | 36.438   | Stalled      | chr11:3315985-3354328     | 36.344  |
| <b>Sic6a3</b>        | 100 | 0  | 1.666747 | 51   | 0.85     | 0.163171 | 1.780848 | Unclassified | chr13:73672194-73716120   | 41.927  |
| <b>Sic39a10</b>      | 100 | 0  | 1.666747 | 157  | 2.616667 | 2.15316  | 95.96012 | Stalled      | chr1:46864388-46912354    | 45.967  |
| <b>Phf17</b>         | 100 | 0  | 1.666747 | 1623 | 27.05    | 4.40351  | 11.02574 | Stalled      | chr3:41366801-41420786    | 51.986  |
| <b>Rnf182</b>        | 100 | 0  | 1.666747 | 52   | 0.866667 | 0.197847 | 0.999249 | Unclassified | chr13:43709351-43764272   | 52.922  |
| <b>Vps45</b>         | 100 | 0  | 1.666747 | 271  | 4.516667 | 11.0165  | 24.02286 | Stalled      | chr3:95803755-95864378    | 58.624  |
| <b>Tmem26</b>        | 100 | 0  | 1.666747 | 176  | 2.933333 | 3.40304  | 18.07289 | Stalled      | chr10:68184493-68245402   | 58.91   |
| <b>Stxbp1</b>        | 100 | 0  | 1.666747 | 231  | 3.85     | 2.45769  | 8.096897 | Stalled      | chr2:32643126-32704752    | 59.627  |
| <b>Abhd12</b>        | 100 | 0  | 1.666747 | 449  | 7.483333 | 12.4236  | 36.14168 | Stalled      | chr2:150658250-150732467  | 72.218  |
| <b>Trak2</b>         | 100 | 0  | 1.666747 | 594  | 9.9      | 6.57453  | 30.39117 | Stalled      | chr1:58957293-59032326    | 73.034  |
| <b>Nfat5</b>         | 100 | 0  | 1.666747 | 316  | 5.266667 | 3.8512   | 57.46998 | Stalled      | chr8:109815369-109903417  | 86.049  |
| <b>Shoc2</b>         | 100 | 0  | 1.666747 | 293  | 4.883333 | 9.56133  | 35.384   | Stalled      | chr19:54017365-54107768   | 88.404  |
| <b>Kctd1</b>         | 100 | 0  | 1.666747 | 734  | 12.23333 | 9.28379  | 14.06375 | Stalled      | chr18:15127194-15224091   | 94.898  |
| <b>Gstcd</b>         | 100 | 0  | 1.666747 | 473  | 7.883333 | 5.10293  | 100.337  | Stalled      | chr3:132645514-132756704  | 109.191 |
| <b>Grb11</b>         | 100 | 55 | 1.666747 | 301  | 5.016667 | 0.645221 | 0.440275 | Unclassified | chr18:10323176-10562939   | 237.764 |
| <b>Scfd2</b>         | 100 | 0  | 1.666747 | 1250 | 20.83333 | 7.79977  | 33.29803 | Stalled      | chr5:74600840-74929774    | 326.935 |
| <b>Rps15</b>         | 99  | 0  | 1.650079 | 153  | 2.55     | 920.495  | 1.860389 | Unclassified | chr10:79753175-79756858   | 1.684   |
| <b>2210404O07Rik</b> | 99  | 0  | 1.650079 | 7    | 0.116667 | 2.22769  | 3.171386 | Stalled      | chr10:80853808-80857824   | 2.017   |
| <b>1700037C18Rik</b> | 99  | 0  | 1.650079 | 53   | 0.883333 | 10.875   | 6.793598 | Stalled      | chr16:3905797-3910689     | 2.893   |
| <b>Timm10</b>        | 99  | 0  | 1.650079 | 37   | 0.616667 | 24.2626  | 6.381487 | Stalled      | chr2:84665177-84670370    | 3.194   |
| <b>Ppp1r11</b>       | 99  | 0  | 1.650079 | 141  | 2.35     | 53.1545  | 3.719317 | Stalled      | chr17:37085299-37090734   | 3.436   |
| <b>Tubb2a</b>        | 99  | 0  | 1.650079 | 30   | 0.5      | 9.22501  | 21.53416 | Stalled      | chr13:34166146-34171877   | 3.732   |
| <b>2310033E01Rik</b> | 99  | 0  | 1.650079 | 8    | 0.133333 | 3.07143  | 3.836197 | Unclassified | chr7:25326676-25333024    | 4.349   |
| <b>Lypla2</b>        | 99  | 0  | 1.650079 | 129  | 2.15     | 45.4087  | 5.118727 | Stalled      | chr4:135524139-135530509  | 4.371   |
| <b>Brf2</b>          | 99  | 0  | 1.650079 | 57   | 0.95     | 10.9511  | 6.190553 | Stalled      | chr8:28234303-28241104    | 4.802   |
| <b>Camk2n1</b>       | 99  | 0  | 1.650079 | 9    | 0.15     | 0.296145 | 2.453005 | Unclassified | chr4:138009062-138016041  | 4.98    |
| <b>1110002N22Rik</b> | 99  | 0  | 1.650079 | 103  | 1.716667 | 3.70393  | 11.37193 | Stalled      | chr11:79950179-79957655   | 5.477   |
| <b>Ftsjd1</b>        | 99  | 0  | 1.650079 | 47   | 0.783333 | 1.90207  | 12.31895 | Stalled      | chr8:112739859-112748389  | 6.531   |
| <b>5133401N09Rik</b> | 99  | 0  | 1.650079 | 99   | 1.65     | 8.42186  | 5.921772 | Stalled      | chr13:58257014-58266052   | 7.039   |
| <b>Cdk10</b>         | 99  | 0  | 1.650079 | 70   | 1.166667 | 7.80312  | 21.15829 | Stalled      | chr8:125746740-125756155  | 7.416   |
| <b>Abhd14a</b>       | 99  | 0  | 1.650079 | 34   | 0.566667 | 7.12636  | 15.66329 | Stalled      | chr9:106342381-106352009  | 7.629   |
| <b>Zfp646</b>        | 99  | 0  | 1.650079 | 462  | 7.7      | 8.82719  | 0.761788 | Stalled      | chr7:135019214-135029509  | 8.296   |
| <b>Ufm1</b>          | 99  | 0  | 1.650079 | 154  | 2.566667 | 7.38596  | 7.007426 | Stalled      | chr3:53659130-53669729    | 8.6     |
| <b>Gpr83</b>         | 99  | 0  | 1.650079 | 17   | 0.283333 | 0.244717 | 2.613221 | Unclassified | chr9:14662697-14673943    | 9.247   |
| <b>1110038D17Rik</b> | 99  | 0  | 1.650079 | 173  | 2.883333 | 7.4998   | 10.94241 | Stalled      | chr10:74969558-74982067   | 10.51   |
| <b>Psm2</b>          | 99  | 0  | 1.650079 | 102  | 1.7      | 48.2878  | 29.10919 | Stalled      | chr16:20649724-20663485   | 11.762  |
| <b>Mtrf11</b>        | 99  | 0  | 1.650079 | 162  | 2.7      | 4.09675  | 10.47922 | Stalled      | chr10:4520597-4534654     | 12.058  |
| <b>Uqcrc1</b>        | 99  | 0  | 1.650079 | 323  | 5.383333 | 76.0077  | 7.610503 | Stalled      | chr9:108836660-108851686  | 13.027  |
| <b>Tbkbp1</b>        | 99  | 0  | 1.650079 | 131  | 2.183333 | 0.257479 | 0.61167  | Stalled      | chr11:96997484-97013026   | 13.543  |
| <b>Prpf38a</b>       | 99  | 0  | 1.650079 | 218  | 3.633333 | 23.9843  | 18.50676 | Stalled      | chr4:108237471-108253941  | 14.471  |
| <b>Zfp94</b>         | 99  | 0  | 1.650079 | 129  | 2.15     | 2.03853  | 19.63049 | Stalled      | chr7:25086814-25103623    | 14.81   |



|               |    |   |          |      |          |          |          |              |                           |         |
|---------------|----|---|----------|------|----------|----------|----------|--------------|---------------------------|---------|
| Gm9705        | 99 | 0 | 1.650079 | 43   | 0.716667 | 0.694502 | 0.24385  | Unclassified | chr17:32756263-32773129   | 14.867  |
| H2-T24        | 99 | 0 | 1.650079 | 290  | 4.833333 | 0        | 5.111131 | Stalled      | chr17:36142639-36159505   | 14.867  |
| Cinp          | 99 | 0 | 1.650079 | 367  | 6.116667 | 9.19493  | 12.88149 | Stalled      | chr12:112110831-112129324 | 16.494  |
| Dctn6         | 99 | 0 | 1.650079 | 176  | 2.933333 | 14.1189  | 19.20623 | Stalled      | chr8:35153476-35173565    | 18.09   |
| Mctn2         | 99 | 0 | 1.650079 | 179  | 2.983333 | 18.5385  | 36.21689 | Stalled      | chr2:90685311-90706791    | 19.481  |
| 1500035H01Rik | 99 | 0 | 1.650079 | 215  | 3.583333 | 4.80788  | 7.684288 | Stalled      | chr9:44579091-44600797    | 19.707  |
| Acadm         | 99 | 0 | 1.650079 | 177  | 2.95     | 9.65784  | 30.11094 | Stalled      | chr3:153585322-153609396  | 22.075  |
| Mrpl13        | 99 | 0 | 1.650079 | 179  | 2.983333 | 27.6016  | 26.6117  | Stalled      | chr15:55365649-55390867   | 23.219  |
| Col8a2        | 99 | 0 | 1.650079 | 97   | 1.616667 | 0.050307 | 0.644449 | Unclassified | chr4:125962037-125991574  | 27.538  |
| Mphosph8      | 99 | 0 | 1.650079 | 204  | 3.4      | 8.9691   | 37.74767 | Stalled      | chr14:57285084-57316264   | 29.181  |
| Cuap1         | 99 | 0 | 1.650079 | 397  | 6.616667 | 9.1424   | 14.76484 | Stalled      | chr16:3907008-3941147     | 32.14   |
| Rint1         | 99 | 0 | 1.650079 | 253  | 4.216667 | 3.53992  | 29.55722 | Stalled      | chr5:23291561-23326187    | 32.627  |
| Tesc          | 99 | 0 | 1.650079 | 211  | 3.516667 | 0.965986 | 0.270832 | Stalled      | chr5:118475832-118511879  | 34.048  |
| Cspg4         | 99 | 0 | 1.650079 | 90   | 1.5      | 0.122591 | 0.272833 | Unclassified | chr9:56710910-56747677    | 34.768  |
| Orc11         | 99 | 0 | 1.650079 | 446  | 7.433333 | 4.70532  | 22.47185 | Stalled      | chr4:108250058-108287436  | 35.379  |
| Tbce          | 99 | 0 | 1.650079 | 530  | 8.833333 | 9.41272  | 22.4394  | Stalled      | chr13:14090217-14133867   | 41.651  |
| Sugt1         | 99 | 0 | 1.650079 | 280  | 4.666667 | 19.7578  | 37.85993 | Stalled      | chr14:79985497-80029562   | 42.066  |
| Traf3ip2      | 99 | 0 | 1.650079 | 1144 | 19.06667 | 9.83725  | 7.679005 | Stalled      | chr10:39330739-39375113   | 42.375  |
| Mtf1          | 99 | 0 | 1.650079 | 725  | 12.08333 | 3.31521  | 24.16841 | Stalled      | chr4:124477792-124527044  | 47.253  |
| App12         | 99 | 0 | 1.650079 | 325  | 5.416667 | 1.27946  | 6.77477  | Stalled      | chr10:83062778-83113409   | 48.632  |
| Chd11         | 99 | 0 | 1.650079 | 443  | 7.383333 | 7.19796  | 29.96674 | Stalled      | chr3:97364670-97416113    | 49.444  |
| Suv420h1      | 99 | 0 | 1.650079 | 666  | 11.1     | 8.55179  | 9.476532 | Stalled      | chr19:3765420-3818302     | 50.883  |
| Casc5         | 99 | 0 | 1.650079 | 563  | 9.383333 | 2.04428  | 23.79476 | Stalled      | chr2:118870854-118929857  | 57.004  |
| Spsb1         | 99 | 0 | 1.650079 | 1117 | 18.61667 | 9.79351  | 9.925947 | Stalled      | chr4:149270392-149331115  | 58.724  |
| Mtbp          | 99 | 0 | 1.650079 | 701  | 11.68333 | 6.92192  | 21.49226 | Stalled      | chr15:55386962-55457977   | 69.016  |
| Bai1          | 99 | 0 | 1.650079 | 153  | 2.55     | 0.082327 | 0.64163  | Unclassified | chr15:74344625-74419894   | 73.27   |
| Olf56         | 99 | 0 | 1.650079 | 784  | 13.06667 | 14.9984  | 0        | Stalled      | chr11:48862234-48948889   | 84.656  |
| Lmtk2         | 99 | 0 | 1.650079 | 688  | 11.46667 | 3.23804  | 18.14311 | Stalled      | chr5:144859304-144949073  | 87.77   |
| Eif2c3        | 99 | 0 | 1.650079 | 203  | 3.383333 | 1.67607  | 91.53149 | Stalled      | chr4:126017921-126108786  | 88.866  |
| 2310035C23Rik | 99 | 0 | 1.650079 | 401  | 6.683333 | 6.04409  | 53.28795 | Stalled      | chr1:107558437-107651708  | 91.272  |
| Itfg1         | 99 | 0 | 1.650079 | 351  | 5.85     | 7.05078  | 73.16844 | Stalled      | chr8:88241455-88366848    | 123.394 |
| Pign          | 99 | 0 | 1.650079 | 361  | 6.016667 | 3.04024  | 81.11415 | Stalled      | chr1:107417716-107562253  | 142.538 |
| Phkb          | 99 | 0 | 1.650079 | 588  | 9.8      | 3.09065  | 76.70774 | Stalled      | chr8:88362900-88584541    | 219.642 |
| Ppm1h         | 99 | 0 | 1.650079 | 437  | 7.283333 | 6.624505 | 4.919298 | Unclassified | chr10:122113817-122382849 | 267.033 |
| Nfia          | 99 | 0 | 1.650079 | 891  | 14.85    | 0.494871 | 0        | Unclassified | chr4:97246633-97785567    | 536.935 |
| Pole3         | 98 | 0 | 1.633412 | 6    | 0.1      | 55.9206  | 6.711183 | Unclassified | chr4:62184834-62188048    | 1.215   |
| Cd14          | 98 | 0 | 1.633412 | 2    | 0.033333 | 4.29732  | 1.365006 | Unclassified | chr18:36884720-36888308   | 1.589   |
| Ccr10         | 98 | 0 | 1.633412 | 18   | 0.3      | 1.43374  | 0.744074 | Unclassified | chr11:101034311-101038757 | 2.447   |
| Mrpl32        | 98 | 0 | 1.633412 | 11   | 0.183333 | 16.4827  | 44.61658 | Stalled      | chr13:14702567-14707304   | 2.738   |
| Atf5          | 98 | 0 | 1.633412 | 42   | 0.7      | 55.8393  | 7.254662 | Stalled      | chr7:52067625-52073028    | 3.404   |
| Trhr2         | 98 | 0 | 1.633412 | 23   | 0.383333 | 0.210417 | 0.21574  | Unclassified | chr8:124880866-124886646  | 3.781   |
| H2-K1         | 98 | 0 | 1.633412 | 370  | 6.166667 | 827.597  | 4.290349 | Stalled      | chr17:34132956-34139278   | 4.323   |
| Creb3         | 98 | 0 | 1.633412 | 56   | 0.933333 | 28.3106  | 11.7097  | Stalled      | chr4:43573505-43579932    | 4.428   |
| Tmub2         | 98 | 0 | 1.633412 | 194  | 3.233333 | 14.5792  | 1.403793 | Elongating   | chr11:102144274-102150738 | 4.465   |
| Rogdi         | 98 | 0 | 1.633412 | 36   | 0.6      | 9.37976  | 16.71581 | Stalled      | chr16:5008821-5015664     | 4.826   |
| Rps7          | 98 | 0 | 1.633412 | 500  | 8.333333 | 172.808  | 3.390004 | Stalled      | chr12:29315711-29322818   | 5.108   |
| Chmp6         | 98 | 0 | 1.633412 | 170  | 2.833333 | 17.4534  | 4.642357 | Stalled      | chr11:119773123-119780866 | 5.744   |
| Foxr1         | 98 | 0 | 1.633412 | 22   | 0.366667 | 0.207708 | 1.019684 | Unclassified | chr9:44242316-44250951    | 6.636   |
| Gpn2          | 98 | 0 | 1.633412 | 223  | 3.716667 | 19.9208  | 9.267261 | Stalled      | chr4:133138287-133147650  | 7.364   |
| Arfrp1        | 98 | 0 | 1.633412 | 278  | 4.633333 | 8.64097  | 7.170879 | Stalled      | chr2:181092394-181102109  | 7.716   |
| Gins2         | 98 | 0 | 1.633412 | 235  | 3.916667 | 34.8213  | 3.098329 | Stalled      | chr8:123105165-123114975  | 7.811   |
| Cby1          | 98 | 0 | 1.633412 | 38   | 0.633333 | 9.43503  | 10.63662 | Stalled      | chr15:79487656-79498090   | 8.435   |
| 1110004E09Rik | 98 | 0 | 1.633412 | 94   | 1.566667 | 12.3621  | 12.8432  | Stalled      | chr16:90926055-90937094   | 9.04    |
| Acp2          | 98 | 0 | 1.633412 | 103  | 1.716667 | 2.75771  | 14.92092 | Stalled      | chr2:91041086-91052300    | 9.215   |
| Srf           | 98 | 0 | 1.633412 | 414  | 6.9      | 26.1146  | 4.770378 | Stalled      | chr17:46683787-46695111   | 9.325   |
| Ncdn          | 98 | 0 | 1.633412 | 338  | 5.633333 | 14.2961  | 10.24149 | Stalled      | chr4:126420993-126432673  | 9.681   |
| B4galt7       | 98 | 0 | 1.633412 | 116  | 1.933333 | 6.87258  | 9.068525 | Stalled      | chr13:55699471-55711315   | 9.845   |
| 33gnt3        | 98 | 0 | 1.633412 | 91   | 1.516667 | 2.36408  | 1.179811 | Stalled      | chr8:74215617-74227699    | 10.083  |
| Acin1         | 98 | 0 | 1.633412 | 769  | 12.81667 | 113.438  | 2.660106 | Elongating   | chr14:55260997-55274522   | 11.526  |
| Zfp128        | 98 | 0 | 1.633412 | 34   | 0.566667 | 1.80262  | 18.39165 | Stalled      | chr7:13464526-13478770    | 12.245  |
| Psm2          | 98 | 0 | 1.633412 | 156  | 2.6      | 56.4576  | 22.80687 | Stalled      | chr13:14703508-14717940   | 12.433  |
| Zfp260        | 98 | 0 | 1.633412 | 73   | 1.216667 | 1.88779  | 18.70097 | Stalled      | chr7:30878094-30892633    | 12.54   |
| Ldb1          | 98 | 0 | 1.633412 | 547  | 9.116667 | 63.7841  | 4.573192 | Stalled      | chr19:46107090-46121701   | 12.612  |
| Ticam2        | 98 | 0 | 1.633412 | 245  | 4.083333 | 16.0686  | 14.81487 | Stalled      | chr18:46717884-46736186   | 16.303  |
| Pgd           | 98 | 0 | 1.633412 | 453  | 7.55     | 66.7077  | 9.426537 | Stalled      | chr4:148524093-148542816  | 16.724  |
| AI597479      | 98 | 0 | 1.633412 | 56   | 0.933333 | 3.55834  | 69.45848 | Stalled      | chr1:43153554-43172791    | 17.238  |
| Casp2         | 98 | 0 | 1.633412 | 252  | 4.2      | 9.62818  | 9.196376 | Stalled      | chr6:42213037-42232495    | 17.459  |
| Churc1        | 98 | 0 | 1.633412 | 120  | 2        | 18.9498  | 24.67824 | Stalled      | chr12:77864559-77884165   | 17.607  |
| P4htm         | 98 | 0 | 1.633412 | 231  | 3.85     | 5.72053  | 6.216484 | Stalled      | chr9:108481156-108501931  | 18.776  |
| Cdh15         | 98 | 0 | 1.633412 | 44   | 0.733333 | 0.360267 | 1.162435 | Unclassified | chr8:125370273-125391297  | 19.025  |
| Sft2d2        | 98 | 0 | 1.633412 | 550  | 9.166667 | 17.3308  | 7.950918 | Stalled      | chr1:167104473-167126564  | 20.092  |
| Ufsp2         | 98 | 0 | 1.633412 | 92   | 1.533333 | 12.5543  | 29.49098 | Stalled      | chr8:47058892-47082213    | 21.322  |
| 1700029J07Rik | 98 | 0 | 1.633412 | 23   | 0.383333 | 2.28236  | 73.79692 | Stalled      | chr8:47038959-47062606    | 21.648  |
| Wfdc1         | 98 | 0 | 1.633412 | 45   | 0.75     | 0.032891 | 0.62924  | Unclassified | chr8:122188264-122211920  | 21.657  |
| Csrp1         | 98 | 0 | 1.633412 | 309  | 5.15     | 35.497   | 19.10305 | Stalled      | chr1:137623773-137648806  | 23.034  |
| Pfkfb2        | 98 | 0 | 1.633412 | 95   | 1.583333 | 1.53511  | 40.69343 | Stalled      | chr1:132588832-132614398  | 23.567  |
| Pola2         | 98 | 0 | 1.633412 | 609  | 10.15    | 19.9355  | 9.006222 | Stalled      | chr19:5940542-5966206     | 23.665  |
| Celsr2        | 98 | 0 | 1.633412 | 87   | 1.45     | 0.515245 | 1.282337 | Unclassified | chr3:108193765-108220412  | 24.648  |
| Utp18         | 98 | 0 | 1.633412 | 299  | 4.983333 | 12.8839  | 29.96695 | Stalled      | chr11:93720556-93749080   | 26.525  |
| Ywhaq         | 98 | 0 | 1.633412 | 421  | 7.016667 | 13.4823  | 25.3435  | Stalled      | chr12:21396189-21425297   | 27.109  |
| Txndc12       | 98 | 0 | 1.633412 | 400  | 6.666667 | 13.7994  | 5.766771 | Stalled      | chr4:108505282-108534724  | 27.443  |
| Tmem209       | 98 | 0 | 1.633412 | 417  | 6.95     | 4.36846  | 23.61314 | Stalled      | chr6:30431232-30461706    | 28.475  |
| Rbm5          | 98 | 0 | 1.633412 | 816  | 13.6     | 29.5688  | 12.66902 | Stalled      | chr9:107642825-107675333  | 30.509  |
| Trpc2         | 98 | 0 | 1.633412 | 278  | 4.633333 | 2.50733  | 13.03253 | Stalled      | chr7:109212226-109244930  | 30.705  |
| Pitrm1        | 98 | 0 | 1.633412 | 372  | 6.2      | 9.88453  | 20.30406 | Stalled      | chr13:6545402-6579395     | 31.994  |
| Samd4b        | 98 | 0 | 1.633412 | 379  | 6.316667 | 9.27262  | 4.214882 | Stalled      | chr7:29184542-29223210    | 36.669  |



|                      |    |     |          |      |          |          |          |              |                           |          |
|----------------------|----|-----|----------|------|----------|----------|----------|--------------|---------------------------|----------|
| <b>Pla1a</b>         | 98 | 0   | 1.633412 | 234  | 3.9      | 0.571165 | 0.933873 | Stalled      | chr16:38396202-38435225   | 37.024   |
| <b>Hs3st3b1</b>      | 98 | 0   | 1.633412 | 70   | 1.166667 | 0.923446 | 14.41845 | Stalled      | chr11:63698194-63737786   | 37.593   |
| <b>Hnrrnpm</b>       | 98 | 0   | 1.633412 | 932  | 15.53333 | 118.838  | 15.12962 | Stalled      | chr17:33783177-33824403   | 39.227   |
| <b>Eiv5l</b>         | 98 | 0   | 1.633412 | 151  | 2.516667 | 3.07889  | 4.43961  | Stalled      | chr8:4164566-4208046      | 41.481   |
| <b>4933429F08Rik</b> | 98 | 0   | 1.633412 | 46   | 0.766667 | 0.190224 | 3.330233 | Unclassified | chr18:61653447-61698190   | 42.744   |
| <b>Uhrf1bp1</b>      | 98 | 0   | 1.633412 | 337  | 5.616667 | 2.4617   | 10.19849 | Stalled      | chr17:27991451-28036985   | 43.535   |
| <b>Mtap</b>          | 98 | 0   | 1.633412 | 1041 | 17.35    | 11.6873  | 12.53605 | Stalled      | chr4:88781273-88826994    | 43.722   |
| <b>Iqcb1</b>         | 98 | 0   | 1.633412 | 254  | 4.233333 | 3.91531  | 22.14446 | Stalled      | chr16:36826485-36872799   | 44.315   |
| <b>Lcp2</b>          | 98 | 0   | 1.633412 | 1177 | 19.61667 | 11.5241  | 3.682198 | Stalled      | chr11:33945200-33992280   | 45.081   |
| <b>Cdc40</b>         | 98 | 0   | 1.633412 | 295  | 4.916667 | 12.0557  | 14.16389 | Stalled      | chr10:40552698-40604949   | 50.252   |
| <b>Tgfbra1</b>       | 98 | 0   | 1.633412 | 264  | 4.4      | 5.61     | 49.33702 | Stalled      | chr1:43104113-43157467    | 51.355   |
| <b>Wasf1</b>         | 98 | 0   | 1.633412 | 42   | 0.7      | 0.22617  | 35.44812 | Stalled      | chr10:40601339-40658375   | 55.037   |
| <b>Eif5b</b>         | 98 | 0   | 1.633412 | 819  | 13.65    | 14.5891  | 14.925   | Stalled      | chr1:38052854-38112424    | 57.571   |
| <b>Eif2ak3</b>       | 98 | 0   | 1.633412 | 811  | 13.51667 | 9.31974  | 19.06568 | Stalled      | chr6:70792520-70855234    | 60.715   |
| <b>Lmin</b>          | 98 | 0   | 1.633412 | 113  | 1.883333 | 0.829741 | 136.9535 | Stalled      | chr16:33060606-33125745   | 63.14    |
| <b>D17Wsu92e</b>     | 98 | 0   | 1.633412 | 1136 | 18.93333 | 32.0966  | 15.82502 | Stalled      | chr17:27888179-27959487   | 69.309   |
| <b>Xrcc5</b>         | 98 | 0   | 1.633412 | 433  | 7.216667 | 4.47672  | 23.31851 | Stalled      | chr1:72351994-72441527    | 87.534   |
| <b>AU040320</b>      | 98 | 0   | 1.633412 | 743  | 12.38333 | 8.88165  | 55.41424 | Stalled      | chr4:126428798-126546938  | 116.141  |
| <b>Emi6</b>          | 98 | 0   | 1.633412 | 371  | 6.183333 | 0.352088 | 6.045747 | Unclassified | chr11:29643050-29928033   | 282.984  |
| <b>Sdhaf1</b>        | 97 | 0   | 1.616744 | 0    | 0        | 29.8233  | 213      | Unclassified | chr7:31106427-31109394    | 0.968    |
| <b>Atp5k</b>         | 97 | 0   | 1.616744 | 0    | 0        | 115.962  | 212      | Unclassified | chr5:108862271-108865397  | 1.127    |
| <b>Mab21l2</b>       | 97 | 0   | 1.616744 | 14   | 0.233333 | 6.95818  | 0.759552 | Unclassified | chr3:86349502-86354205    | 2.704    |
| <b>Cks1b</b>         | 97 | 0   | 1.616744 | 36   | 0.6      | 54.8729  | 12.71103 | Stalled      | chr3:89219393-89224213    | 2.821    |
| <b>Zrsr1</b>         | 97 | 0   | 1.616744 | 36   | 0.6      | 13.1138  | 2.532431 | Stalled      | chr11:22870028-22874908   | 2.881    |
| <b>Fbxo48</b>        | 97 | 0   | 1.616744 | 23   | 0.383333 | 13.0193  | 42.96657 | Stalled      | chr11:16849412-16854775   | 3.364    |
| <b>1700034H14Rik</b> | 97 | 0   | 1.616744 | 19   | 0.316667 | 14.0603  | 33.00036 | Stalled      | chr18:85116685-85122916   | 4.232    |
| <b>Cox7a2</b>        | 97 | 0   | 1.616744 | 42   | 0.7      | 29.7859  | 23.21441 | Stalled      | chr9:79603047-79609660    | 4.614    |
| <b>2010317E24Rik</b> | 97 | 0   | 1.616744 | 101  | 1.683333 | 10.0303  | 13.49508 | Stalled      | chr2:25225840-25233733    | 5.894    |
| <b>Gpc2</b>          | 97 | 0   | 1.616744 | 20   | 0.333333 | 1.29526  | 5.011907 | Stalled      | chr5:138714887-138723165  | 6.279    |
| <b>1500011H22Rik</b> | 97 | 0   | 1.616744 | 85   | 1.416667 | 7.59325  | 6.913023 | Stalled      | chr5:122814592-122823972  | 7.381    |
| <b>Mobkl2c</b>       | 97 | 0   | 1.616744 | 100  | 1.666667 | 2.42781  | 8.146555 | Stalled      | chr4:115498696-115508788  | 8.093    |
| <b>Bola3</b>         | 97 | 0   | 1.616744 | 268  | 4.466667 | 20.7585  | 5.791091 | Stalled      | chr6:83297477-83308386    | 8.91     |
| <b>1200011M11Rik</b> | 97 | 0   | 1.616744 | 76   | 1.266667 | 9.16549  | 13.97863 | Stalled      | chr11:86891233-86902279   | 9.047    |
| <b>Ankrd2</b>        | 97 | 0   | 1.616744 | 14   | 0.233333 | 0.09321  | 2.194618 | Unclassified | chr19:42108527-42119600   | 9.074    |
| <b>Yeats4</b>        | 97 | 0   | 1.616744 | 315  | 5.25     | 38.8687  | 11.43658 | Stalled      | chr10:116652197-116663563 | 9.367    |
| <b>Gpn3</b>          | 97 | 0   | 1.616744 | 115  | 1.916667 | 18.2065  | 16.77229 | Stalled      | chr5:122820516-122832778  | 10.263   |
| <b>Ddrgk1</b>        | 97 | 0   | 1.616744 | 170  | 2.833333 | 39.6784  | 19.49402 | Stalled      | chr2:130479818-130492381  | 10.564   |
| <b>Tada3</b>         | 97 | 0   | 1.616744 | 86   | 1.433333 | 11.219   | 24.07104 | Stalled      | chr6:113316654-113329514  | 10.861   |
| <b>Maff</b>          | 97 | 0   | 1.616744 | 355  | 5.916667 | 3.09649  | 1.935413 | Elongating   | chr15:79176107-79189506   | 11.4     |
| <b>Cicnkb</b>        | 97 | 0   | 1.616744 | 41   | 0.683333 | 0.076679 | 0.823737 | Unclassified | chr4:140960271-140973903  | 11.633   |
| <b>Zfp174</b>        | 97 | 0   | 1.616744 | 30   | 0.5      | 2.74945  | 13.1078  | Stalled      | chr16:3845222-3858880     | 11.659   |
| <b>U2af1</b>         | 97 | 0   | 1.616744 | 980  | 16.33333 | 35.2166  | 3.868039 | Stalled      | chr17:31784026-31797699   | 11.674   |
| <b>Dhx16</b>         | 97 | 0   | 1.616744 | 313  | 5.216667 | 26.0829  | 6.880236 | Stalled      | chr17:36014722-36029611   | 12.89    |
| <b>Smagp</b>         | 97 | 0   | 1.616744 | 208  | 3.466667 | 5.75395  | 1.501485 | Elongating   | chr15:100451770-100469296 | 15.527   |
| <b>Col9a2</b>        | 97 | 0   | 1.616744 | 47   | 0.783333 | 0.135221 | 0.956008 | Unclassified | chr4:120710170-120727930  | 15.761   |
| <b>Cyb5d2</b>        | 97 | 0   | 1.616744 | 92   | 1.533333 | 4.42269  | 42.73366 | Stalled      | chr11:72590733-72611341   | 18.609   |
| <b>Coq10b</b>        | 97 | 0   | 1.616744 | 138  | 2.3      | 2.52467  | 12.66819 | Stalled      | chr1:55107613-55129546    | 19.934   |
| <b>Mns1</b>          | 97 | 0   | 1.616744 | 171  | 2.85     | 9.7666   | 19.33747 | Stalled      | chr9:72284341-72306381    | 20.041   |
| <b>Seh1l</b>         | 97 | 0   | 1.616744 | 350  | 5.833333 | 12.7481  | 29.60949 | Stalled      | chr18:67932529-67955141   | 20.613   |
| <b>Dpp3</b>          | 97 | 0   | 1.616744 | 442  | 7.366667 | 36.4599  | 11.2443  | Stalled      | chr19:4907228-4930287     | 21.06    |
| <b>4930402F06Rik</b> | 97 | 0   | 1.616744 | 30   | 0.5      | 0.130779 | 2.443742 | Unclassified | chr2:35231081-35254695    | 21.615   |
| <b>Ndufa12</b>       | 97 | 0   | 1.616744 | 317  | 5.283333 | 42.3547  | 17.28864 | Stalled      | chr10:93659753-93683693   | 21.941   |
| <b>4933430I17Rik</b> | 97 | 0   | 1.616744 | 26   | 0.433333 | 0.129385 | 70.83643 | Stalled      | chr4:62184402-62209027    | 22.626   |
| <b>Ammecr1l</b>      | 97 | 0   | 1.616744 | 232  | 3.866667 | 7.65331  | 14.80543 | Stalled      | chr18:31917533-31942383   | 22.851   |
| <b>Trove2</b>        | 97 | 0   | 1.616744 | 33   | 0.55     | 0.333595 | 120.9725 | Stalled      | chr1:145597920-145626181  | 26.262   |
| <b>Tecpr1</b>        | 97 | 0   | 1.616744 | 224  | 3.733333 | 5.11389  | 19.18508 | Stalled      | chr5:144956217-144986447  | 28.231   |
| <b>Wdr36</b>         | 97 | 41  | 1.616744 | 261  | 4.35     | 14.0086  | 21.84023 | Stalled      | chr18:32994878-33026074   | 29.197   |
| <b>Bclaf1</b>        | 97 | 0   | 1.616744 | 606  | 10.1     | 19.7007  | 34.42745 | Stalled      | chr10:20030274-20062307   | 30.034   |
| <b>Pdcd4</b>         | 97 | 0   | 1.616744 | 464  | 7.733333 | 7.94558  | 0.292686 | Stalled      | chr19:53964720-54004351   | 37.632   |
| <b>Acad10</b>        | 97 | 0   | 1.616744 | 93   | 1.55     | 2.5774   | 51.80511 | Stalled      | chr5:122071037-122112519  | 39.483   |
| <b>Sptlc1</b>        | 97 | 0   | 1.616744 | 664  | 11.06667 | 8.44315  | 12.20353 | Stalled      | chr13:53428118-53474730   | 44.613   |
| <b>Ap3s2</b>         | 97 | 0   | 1.616744 | 359  | 5.983333 | 5.64315  | 18.2403  | Stalled      | chr7:87020210-87067526    | 45.317   |
| <b>Notch3</b>        | 97 | 0   | 1.616744 | 127  | 2.116667 | 0.241982 | 1.045842 | Unclassified | chr17:32257837-32305797   | 45.961   |
| <b>Dcp1b</b>         | 97 | 0   | 1.616744 | 373  | 6.216667 | 3.83901  | 22.87868 | Stalled      | chr6:119123270-119171632  | 46.363   |
| <b>Fbxo15</b>        | 97 | 0   | 1.616744 | 396  | 6.6      | 0.113133 | 0        | Stalled      | chr18:85102416-85150784   | 46.369   |
| <b>Bahcc1</b>        | 97 | 0   | 1.616744 | 134  | 2.233333 | 0.098461 | 1.213442 | Unclassified | chr11:120092260-120153611 | 59.352   |
| <b>Erich1</b>        | 97 | 0   | 1.616744 | 195  | 3.25     | 3.48975  | 10.34355 | Stalled      | chr8:14027564-14092327    | 62.764   |
| <b>Stk4</b>          | 97 | 51  | 1.616744 | 1483 | 24.71667 | 20.7357  | 13.31079 | Stalled      | chr2:163897913-163981257  | 81.345   |
| <b>Mgat4a</b>        | 97 | 0   | 1.616744 | 1134 | 18.9     | 3.24077  | 0.935875 | Stalled      | chr1:37496184-37595104    | 96.921   |
| <b>Mipep</b>         | 97 | 0   | 1.616744 | 460  | 7.666667 | 6.08781  | 22.66839 | Stalled      | chr14:61401402-61522450   | 119.049  |
| <b>Zzef1</b>         | 97 | 0   | 1.616744 | 797  | 13.28333 | 5.23036  | 29.70986 | Stalled      | chr11:72607727-72740622   | 130.896  |
| <b>Ctnna3</b>        | 97 | 0   | 1.616744 | 739  | 12.31667 | 0.072258 | 145.5851 | Stalled      | chr10:62890845-64466415   | 1573.571 |
| <b>AI462493</b>      | 96 | 0   | 1.600077 | 0    | 0        | 43.3081  | 182      | Unclassified | chr19:8954505-8957423     | 0.919    |
| <b>Fau</b>           | 96 | 0   | 1.600077 | 71   | 1.183333 | 769.403  | 4.744496 | Unclassified | chr19:6055892-6059518     | 1.627    |
| <b>Sephs2</b>        | 96 | 0   | 1.600077 | 55   | 0.916667 | 30.5459  | 5.629049 | Stalled      | chr7:134415394-134419573  | 2.18     |
| <b>Egr1</b>          | 96 | 111 | 1.600077 | 279  | 4.65     | 7.43308  | 3.202572 | Stalled      | chr18:35018860-35024610   | 3.751    |
| <b>Hsbp1</b>         | 96 | 0   | 1.600077 | 33   | 0.55     | 20.0814  | 11.84049 | Stalled      | chr8:121866437-121872829  | 4.393    |
| <b>Chpf</b>          | 96 | 0   | 1.600077 | 45   | 0.75     | 6.61488  | 5.026911 | Stalled      | chr1:75471145-75478046    | 4.902    |
| <b>Sap30</b>         | 96 | 0   | 1.600077 | 12   | 0.2      | 21.6633  | 26.25743 | Stalled      | chr8:59961498-59968657    | 5.16     |
| <b>Mrp120</b>        | 96 | 0   | 1.600077 | 67   | 1.116667 | 52.3122  | 17.57068 | Stalled      | chr4:155175726-155182938  | 5.213    |
| <b>Acadvl</b>        | 96 | 0   | 1.600077 | 80   | 1.333333 | 15.0882  | 3.004382 | Stalled      | chr11:69823693-69830909   | 5.217    |
| <b>Psmc3</b>         | 96 | 0   | 1.600077 | 156  | 2.6      | 82.5252  | 5.76231  | Stalled      | chr2:90892172-90899594    | 5.423    |
| <b>Plscr3</b>        | 96 | 0   | 1.600077 | 44   | 0.733333 | 6.34786  | 18.06806 | Stalled      | chr11:69658118-69665560   | 5.443    |
| <b>Temem134</b>      | 96 | 0   | 1.600077 | 139  | 2.316667 | 36.4616  | 4.965507 | Stalled      | chr19:4123959-4132307     | 6.349    |
| <b>Mrp130</b>        | 96 | 0   | 1.600077 | 90   | 1.5      | 25.783   | 16.32748 | Stalled      | chr1:37945397-37955178    | 7.782    |
| <b>Med4</b>          | 96 | 0   | 1.600077 | 149  | 2.483333 | 16.5963  | 8.480275 | Stalled      | chr14:73907855-73918352   | 8.498    |

|                      |    |    |          |      |          |          |          |              |                           |         |
|----------------------|----|----|----------|------|----------|----------|----------|--------------|---------------------------|---------|
| <b>Rgp1</b>          | 96 | 0  | 1.600077 | 193  | 3.216667 | 0        | 10.62171 | Stalled      | chr4:43589606-43600359    | 8.754   |
| <b>Mitd1</b>         | 96 | 0  | 1.600077 | 93   | 1.55     | 12.2923  | 23.98914 | Stalled      | chr1:37935734-37949256    | 11.523  |
| <b>Gba2</b>          | 96 | 0  | 1.600077 | 241  | 4.016667 | 8.18513  | 11.98057 | Stalled      | chr4:43579801-43593736    | 11.936  |
| <b>2900064A13Rik</b> | 96 | 0  | 1.600077 | 88   | 1.466667 | 27.9354  | 40.64058 | Stalled      | chr2:112293181-112307593  | 12.413  |
| <b>BC053749</b>      | 96 | 0  | 1.600077 | 62   | 1.033333 | 3.31689  | 33.73132 | Stalled      | chr7:31324152-31339291    | 13.14   |
| <b>Polr3c</b>        | 96 | 0  | 1.600077 | 278  | 4.633333 | 26.1351  | 14.81718 | Stalled      | chr3:96515817-96533362    | 15.546  |
| <b>Zfp655</b>        | 96 | 0  | 1.600077 | 165  | 2.75     | 2.99777  | 28.60209 | Stalled      | chr5:145990583-146008175  | 15.593  |
| <b>Pstk</b>          | 96 | 0  | 1.600077 | 90   | 1.5      | 7.28605  | 20.49096 | Stalled      | chr7:138512659-138531352  | 16.694  |
| <b>Rab11b</b>        | 96 | 0  | 1.600077 | 428  | 7.133333 | 6.48477  | 8.100709 | Stalled      | chr17:33879428-33899431   | 18.004  |
| <b>Gbp6</b>          | 96 | 0  | 1.600077 | 149  | 2.483333 | 9.17128  | 10.95224 | Stalled      | chr3:142191301-142213047  | 19.747  |
| <b>rp9</b>           | 96 | 0  | 1.600077 | 193  | 3.216667 | 46.6563  | 9.699647 | Stalled      | chr9:22252757-22274800    | 20.044  |
| <b>Zfp518</b>        | 96 | 0  | 1.600077 | 255  | 4.25     | 1.21293  | 33.21629 | Stalled      | chr19:40967194-40992437   | 23.244  |
| <b>Adpgk</b>         | 96 | 0  | 1.600077 | 455  | 7.583333 | 9.60907  | 25.27748 | Stalled      | chr9:59137378-59164007    | 24.63   |
| <b>Ndufa9</b>        | 96 | 0  | 1.600077 | 397  | 6.616667 | 29.4593  | 9.624447 | Stalled      | chr6:126771880-126801162  | 27.283  |
| <b>Tmem168</b>       | 96 | 0  | 1.600077 | 251  | 4.183333 | 8.22105  | 24.05806 | Stalled      | chr6:13530688-13560063    | 27.376  |
| <b>Dstn</b>          | 96 | 0  | 1.600077 | 174  | 2.9      | 14.2013  | 17.99654 | Stalled      | chr2:143739066-143769059  | 27.994  |
| <b>Dhcr24</b>        | 96 | 0  | 1.600077 | 575  | 9.583333 | 50.275   | 16.32507 | Stalled      | chr4:106231642-106261718  | 28.077  |
| <b>Gabpa</b>         | 96 | 0  | 1.600077 | 320  | 5.333333 | 9.02037  | 30.46761 | Stalled      | chr16:84833368-84864023   | 28.656  |
| <b>Ap2a1</b>         | 96 | 0  | 1.600077 | 537  | 8.95     | 23.002   | 6.568011 | Stalled      | chr7:52155742-52186860    | 29.119  |
| <b>Slc25a46</b>      | 96 | 0  | 1.600077 | 217  | 3.616667 | 5.33895  | 34.84767 | Stalled      | chr18:31739821-31771556   | 29.736  |
| <b>Ercc3</b>         | 96 | 0  | 1.600077 | 344  | 5.733333 | 14.035   | 15.38226 | Stalled      | chr18:32397984-32429801   | 29.818  |
| <b>Stag3</b>         | 96 | 0  | 1.600077 | 24   | 0.4      | 0.430444 | 12.38006 | Stalled      | chr5:138719736-138753621  | 31.886  |
| <b>Zfp398</b>        | 96 | 0  | 1.600077 | 246  | 4.1      | 3.13193  | 21.62703 | Stalled      | chr6:47783659-47818256    | 32.598  |
| <b>Ccdc76</b>        | 96 | 0  | 1.600077 | 521  | 8.683333 | 8.76227  | 0.874455 | Stalled      | chr3:116284253-116319505  | 33.253  |
| <b>Rrn3</b>          | 96 | 0  | 1.600077 | 481  | 8.016667 | 13.0335  | 23.33612 | Stalled      | chr16:13778791-13814934   | 34.144  |
| <b>Snapc3</b>        | 96 | 0  | 1.600077 | 419  | 6.983333 | 11.7419  | 16.62786 | Stalled      | chr4:83061647-83099244    | 35.598  |
| <b>Sass6</b>         | 96 | 0  | 1.600077 | 397  | 6.616667 | 0        | 19.7571  | Stalled      | chr3:116295925-116333902  | 35.978  |
| <b>Samhd1</b>        | 96 | 0  | 1.600077 | 731  | 12.18333 | 46.6672  | 14.43528 | Stalled      | chr2:156923264-156962958  | 37.695  |
| <b>Kif17</b>         | 96 | 0  | 1.600077 | 102  | 1.7      | 1.62319  | 6.271892 | Stalled      | chr4:137816165-137857407  | 39.243  |
| <b>Xpnp1</b>         | 96 | 0  | 1.600077 | 800  | 13.33333 | 24.5694  | 10.02417 | Stalled      | chr19:53065672-53115032   | 47.361  |
| <b>Pcbd2</b>         | 96 | 0  | 1.600077 | 151  | 2.516667 | 29.1491  | 55.39743 | Stalled      | chr13:55826728-55878191   | 49.464  |
| <b>Tmx4</b>          | 96 | 0  | 1.600077 | 79   | 1.316667 | 1.60713  | 64.76324 | Stalled      | chr2:134420241-134471857  | 49.617  |
| <b>Agap3</b>         | 96 | 0  | 1.600077 | 592  | 9.866667 | 12.2706  | 10.52369 | Stalled      | chr5:23955994-24007865    | 49.872  |
| <b>Trim30</b>        | 96 | 0  | 1.600077 | 695  | 11.58333 | 16.753   | 5.662741 | Stalled      | chr7:111557539-111615707  | 56.169  |
| <b>Wdr20a</b>        | 96 | 0  | 1.600077 | 543  | 9.05     | 8.34433  | 15.63316 | Stalled      | chr12:111974158-112033238 | 57.081  |
| <b>Lrig2</b>         | 96 | 0  | 1.600077 | 215  | 3.583333 | 1.9133   | 32.0069  | Stalled      | chr3:104257905-104317779  | 57.875  |
| <b>Sae1</b>          | 96 | 0  | 1.600077 | 1304 | 21.73333 | 60.7677  | 8.979225 | Stalled      | chr7:16912402-16975134    | 60.733  |
| <b>Rnf115</b>        | 96 | 0  | 1.600077 | 536  | 8.933333 | 11.3887  | 32.91642 | Stalled      | chr3:96529533-96595078    | 63.546  |
| <b>Zfyve26</b>       | 96 | 0  | 1.600077 | 1063 | 17.71667 | 6.22252  | 11.96205 | Stalled      | chr12:80333333-80399269   | 63.937  |
| <b>Tnfrsf21</b>      | 96 | 0  | 1.600077 | 163  | 2.716667 | 1.83768  | 10.07503 | Stalled      | chr17:43151503-43226137   | 72.635  |
| <b>Dpp4</b>          | 96 | 0  | 1.600077 | 583  | 9.716667 | 7.12043  | 9.286959 | Stalled      | chr2:62168131-62252288    | 82.158  |
| <b>Cnot4</b>         | 96 | 0  | 1.600077 | 525  | 8.75     | 5.18425  | 33.8145  | Stalled      | chr6:34992708-35085737    | 91.03   |
| <b>Abcg2</b>         | 96 | 57 | 1.600077 | 110  | 1.833333 | 0.384504 | 2.314204 | Unclassified | chr6:58544665-58642445    | 95.781  |
| <b>Plekhh2</b>       | 96 | 0  | 1.600077 | 110  | 1.833333 | 0.027587 | 2.491437 | Unclassified | chr17:84909234-85021482   | 110.249 |
| <b>Rhbdd1</b>        | 96 | 0  | 1.600077 | 660  | 11       | 2.37732  | 51.90791 | Stalled      | chr1:82311153-82441941    | 128.789 |
| <b>Spnb1</b>         | 96 | 0  | 1.600077 | 263  | 4.383333 | 0.398241 | 1.975116 | Unclassified | chr12:77681474-77813534   | 130.061 |
| <b>Tshz2</b>         | 96 | 0  | 1.600077 | 340  | 5.666667 | 0.010027 | 0.854949 | Unclassified | chr2:169457145-169714004  | 254.86  |
| <b>2010111I01Rik</b> | 96 | 0  | 1.600077 | 1299 | 21.65    | 1.80734  | 0.537708 | Stalled      | chr13:63114293-63400964   | 284.672 |
| <b>Grid1</b>         | 96 | 0  | 1.600077 | 529  | 8.816667 | 0.033649 | 1.768795 | Unclassified | chr14:35631321-36394301   | 760.981 |
| <b>Mos</b>           | 95 | 0  | 1.583409 | 0    | 0        | 0.743488 | 2        | Unclassified | chr4:3797804-3801252      | 1.449   |
| <b>S100a6</b>        | 95 | 0  | 1.583409 | 11   | 0.183333 | 12.7619  | 1.812185 | Unclassified | chr3:90414815-90418336    | 1.522   |
| <b>mmu-mir-210</b>   | 95 | 0  | 1.583409 | 44   | 0.733333 | ND       | ND       | Stalled      | chr7:148407055-148409329  | 2.275   |
| <b>Rps25</b>         | 95 | 0  | 1.583409 | 142  | 2.366667 | 102.564  | 4.23223  | Stalled      | chr9:44213796-44218489    | 2.694   |
| <b>Jmj3d8</b>        | 95 | 0  | 1.583409 | 107  | 1.783333 | 12.7834  | 2.582292 | Stalled      | chr17:25963987-25968787   | 2.801   |
| <b>Trappc4</b>       | 95 | 0  | 1.583409 | 46   | 0.766667 | 31.2236  | 23.3961  | Stalled      | chr9:44211841-44217631    | 3.791   |
| <b>Tor2a</b>         | 95 | 0  | 1.583409 | 52   | 0.866667 | 24.6668  | 9.444841 | Stalled      | chr2:32610790-32617764    | 4.975   |
| <b>BC011248</b>      | 95 | 0  | 1.583409 | 132  | 2.2      | 13.3282  | 12.50279 | Stalled      | chr17:46804404-46813204   | 6.801   |
| <b>Tagln2</b>        | 95 | 0  | 1.583409 | 458  | 7.633333 | 102.301  | 4.596952 | Stalled      | chr1:174428376-174437506  | 7.131   |
| <b>Ndufaf1</b>       | 95 | 0  | 1.583409 | 74   | 1.233333 | 10.5365  | 14.30222 | Stalled      | chr2:119481186-119490534  | 7.349   |
| <b>Zfp324</b>        | 95 | 0  | 1.583409 | 101  | 1.683333 | 5.14756  | 15.08559 | Stalled      | chr7:13549212-13559171    | 7.96    |
| <b>Oip5</b>          | 95 | 0  | 1.583409 | 74   | 1.233333 | 8.59354  | 29.28301 | Stalled      | chr2:119435267-119446241  | 8.975   |
| <b>Hyls1</b>         | 95 | 0  | 1.583409 | 193  | 3.216667 | 8.57954  | 12.91304 | Stalled      | chr9:35368405-35379654    | 9.25    |
| <b>Zscan22</b>       | 95 | 0  | 1.583409 | 167  | 2.783333 | 4.53318  | 6.357872 | Stalled      | chr7:13481163-13493588    | 10.426  |
| <b>Exosc2</b>        | 95 | 0  | 1.583409 | 395  | 6.583333 | 24.3019  | 4.708255 | Stalled      | chr2:31524256-31536827    | 10.572  |
| <b>Bccip</b>         | 95 | 0  | 1.583409 | 128  | 2.133333 | 50.7247  | 25.55212 | Stalled      | chr7:140899015-140912828  | 11.814  |
| <b>Adam33</b>        | 95 | 0  | 1.583409 | 61   | 1.016667 | 0.548094 | 0.493116 | Unclassified | chr2:130876552-130891550  | 12.999  |
| <b>Adcy4</b>         | 95 | 0  | 1.583409 | 35   | 0.583333 | 0.060401 | 2.846778 | Unclassified | chr14:56387928-56404856   | 14.929  |
| <b>Tmem50a</b>       | 95 | 0  | 1.583409 | 210  | 3.5      | 40.9821  | 11.01741 | Stalled      | chr4:134453763-134472831  | 17.069  |
| <b>Lztf11</b>        | 95 | 0  | 1.583409 | 43   | 0.716667 | 0.840345 | 13.16106 | Stalled      | chr9:123606710-123628675  | 19.966  |
| <b>A530082C11Rik</b> | 95 | 0  | 1.583409 | 348  | 5.8      | 2.30862  | 28.07836 | Stalled      | chr4:154973524-154997450  | 21.927  |
| <b>Uros</b>          | 95 | 0  | 1.583409 | 90   | 1.5      | 6.02856  | 65.52804 | Stalled      | chr7:140878012-140902978  | 22.967  |
| <b>1200011I18Rik</b> | 95 | 0  | 1.583409 | 165  | 2.75     | 4.92266  | 36.26826 | Stalled      | chr14:76486038-76512622   | 24.585  |
| <b>Tmco1</b>         | 95 | 0  | 1.583409 | 202  | 3.366667 | 4.83174  | 54.03177 | Stalled      | chr1:169236800-169264109  | 25.31   |
| <b>AA408296</b>      | 95 | 0  | 1.583409 | 449  | 7.483333 | 4.54168  | 9.911681 | Stalled      | chr1:194930596-194958445  | 25.85   |
| <b>A430033K04Rik</b> | 95 | 0  | 1.583409 | 129  | 2.15     | 2.85956  | 14.75738 | Stalled      | chr5:139062086-139090054  | 25.969  |
| <b>Nufip1</b>        | 95 | 0  | 1.583409 | 389  | 6.483333 | 6.68749  | 17.8957  | Stalled      | chr14:76508697-76537186   | 26.49   |
| <b>Ptcd3</b>         | 95 | 0  | 1.583409 | 411  | 6.85     | 9.78803  | 17.39775 | Stalled      | chr6:71830631-71860756    | 28.126  |
| <b>Ctss</b>          | 95 | 0  | 1.583409 | 484  | 8.066667 | 82.0211  | 6.420334 | Stalled      | chr3:95328707-95360325    | 29.619  |
| <b>Nusap1</b>        | 95 | 0  | 1.583409 | 433  | 7.216667 | 15.3404  | 17.16648 | Stalled      | chr2:119442033-119475896  | 31.864  |
| <b>Dnajc18</b>       | 95 | 0  | 1.583409 | 152  | 2.533333 | 2.67654  | 27.47276 | Stalled      | chr18:35830758-35864798   | 32.041  |
| <b>2010107G12Rik</b> | 95 | 0  | 1.583409 | 72   | 1.2      | 0.154414 | 0.305663 | Unclassified | chr6:34895304-34929999    | 32.696  |
| <b>1810074P20Rik</b> | 95 | 0  | 1.583409 | 165  | 2.75     | 4.87413  | 39.87905 | Stalled      | chr4:25175733-25210968    | 33.236  |
| <b>Hpse</b>          | 95 | 0  | 1.583409 | 332  | 5.533333 | 11.2921  | 13.62253 | Stalled      | chr5:101108504-1011150702 | 40.199  |
| <b>Gdgd1</b>         | 95 | 0  | 1.583409 | 61   | 1.016667 | 1.93469  | 26.27052 | Stalled      | chr11:86847295-86889639   | 40.345  |
| <b>Cnga3</b>         | 95 | 0  | 1.583409 | 66   | 1.1      | 0.037291 | 0.790378 | Unclassified | chr1:37274105-37320229    | 44.125  |
| <b>Rmnd5a</b>        | 95 | 0  | 1.583409 | 247  | 4.116667 | 6.5225   | 27.38478 | Stalled      | chr6:71338627-71392631    | 52.005  |

|               |    |     |          |      |          |          |          |              |                           |         |
|---------------|----|-----|----------|------|----------|----------|----------|--------------|---------------------------|---------|
| Gm608         | 95 | 0   | 1.583409 | 445  | 7.416667 | 1.92905  | 10.86823 | Stalled      | chr16:44171509-44227578   | 54.07   |
| Mtdh          | 95 | 37  | 1.583409 | 1497 | 24.95    | 52.5891  | 23.34399 | Stalled      | chr15:34010473-34072140   | 59.668  |
| Polr1a        | 95 | 0   | 1.583409 | 997  | 16.61667 | 12.1732  | 18.91419 | Stalled      | chr6:71857046-71929352    | 70.307  |
| Mdfic         | 95 | 0   | 1.583409 | 549  | 9.15     | 4.96537  | 20.97447 | Stalled      | chr6:15668660-15752169    | 81.51   |
| Manba         | 95 | 0   | 1.583409 | 307  | 5.116667 | 5.24537  | 19.69467 | Stalled      | chr3:135146574-135234367  | 85.794  |
| Xrn1          | 95 | 0   | 1.583409 | 598  | 9.966667 | 2.90457  | 20.56585 | Stalled      | chr9:95853178-95953448    | 98.271  |
| Prkc2         | 95 | 0   | 1.583409 | 192  | 3.2      | 0.626    | 4.460039 | Unclassified | chr4:154634228-154737500  | 101.273 |
| Tnrc6c        | 95 | 0   | 1.583409 | 1495 | 24.91667 | 6.83447  | 19.90132 | Stalled      | chr11:117513602-117624753 | 109.152 |
| Mrip          | 95 | 0   | 1.583409 | 540  | 9        | 4.76144  | 7.677266 | Stalled      | chr11:59473996-59594362   | 118.367 |
| Mrps28        | 95 | 0   | 1.583409 | 691  | 11.51667 | 34.9816  | 50.41401 | Stalled      | chr3:8802145-8925857      | 121.713 |
| Hivep1        | 95 | 0   | 1.583409 | 2892 | 48.2     | 6.0397   | 12.3538  | Stalled      | chr13:42145389-42280395   | 133.007 |
| 4930534B04Rik | 95 | 0   | 1.583409 | 1142 | 19.03333 | 3.48699  | 25.46096 | Stalled      | chr12:92236931-92624849   | 385.919 |
| Bcas3         | 95 | 0   | 1.583409 | 963  | 16.05    | 1.82187  | 39.13562 | Stalled      | chr11:85164665-85639559   | 472.895 |
| Scand1        | 94 | 0   | 1.566742 | 0    | 0        | 65.6713  | 377      | Unclassified | chr2:156137581-156140440  | 0.86    |
| Cldn23        | 94 | 0   | 1.566742 | 0    | 0        | 2.39882  | 7        | Unclassified | chr8:36887765-36891613    | 1.849   |
| Ndufa2        | 94 | 0   | 1.566742 | 19   | 0.316667 | 119.27   | 22.87753 | Stalled      | chr18:36902019-36906202   | 2.184   |
| Pim3          | 94 | 0   | 1.566742 | 172  | 2.866667 | 13.4069  | 7.259331 | Stalled      | chr15:88690623-88696156   | 3.534   |
| Ppm1m         | 94 | 0   | 1.566742 | 129  | 2.15     | 47.42    | 4.912505 | Stalled      | chr9:106097283-106103564  | 4.282   |
| Picxd1        | 94 | 0   | 1.566742 | 399  | 6.65     | 3.0227   | 0.061673 | Stalled      | chr5:110526987-110534969  | 5.983   |
| Usf1          | 94 | 0   | 1.566742 | 98   | 1.633333 | 23.0691  | 15.73095 | Stalled      | chr1:173339811-173348873  | 7.063   |
| 4833442J19Rik | 94 | 0   | 1.566742 | 60   | 1        | 3.22674  | 7.752825 | Stalled      | chr6:149088118-149099692  | 9.575   |
| Gcsh          | 94 | 0   | 1.566742 | 55   | 0.916667 | 12.8854  | 15.21665 | Stalled      | chr8:119505727-119519349  | 11.623  |
| Mdh2          | 94 | 0   | 1.566742 | 333  | 5.55     | 121.351  | 12.40297 | Stalled      | chr5:136252518-136266256  | 11.739  |
| Farsa         | 94 | 0   | 1.566742 | 394  | 6.566667 | 35.1764  | 7.426823 | Stalled      | chr8:87378884-87393156    | 12.273  |
| Zfp84         | 94 | 0   | 1.566742 | 201  | 3.35     | 2.83922  | 8.642381 | Stalled      | chr7:30551570-30566438    | 12.869  |
| Ik            | 94 | 0   | 1.566742 | 144  | 2.4      | 46.9848  | 30.11905 | Stalled      | chr18:36902309-36917293   | 12.985  |
| Rai12         | 94 | 0   | 1.566742 | 261  | 4.35     | 36.2704  | 12.27546 | Stalled      | chr11:69781726-69796737   | 13.012  |
| Zfp472        | 94 | 0   | 1.566742 | 125  | 2.083333 | 5.07844  | 21.81104 | Stalled      | chr17:33100775-33116156   | 13.382  |
| Sip1          | 94 | 0   | 1.566742 | 74   | 1.233333 | 12.4438  | 38.33989 | Stalled      | chr12:60112379-60128975   | 14.597  |
| Rae1          | 94 | 0   | 1.566742 | 538  | 8.966667 | 20.2098  | 4.807579 | Stalled      | chr2:172823637-172841233  | 15.597  |
| Adam11        | 94 | 0   | 1.566742 | 50   | 0.833333 | 0.18507  | 0.788426 | Unclassified | chr11:102620752-102641576 | 18.825  |
| E130309D14Rik | 94 | 0   | 1.566742 | 28   | 0.466667 | 0.467473 | 2.137775 | Unclassified | chr11:74431106-74455018   | 21.913  |
| 1700012A16Rik | 94 | 0   | 1.566742 | 516  | 8.6      | 1.30966  | 8.361726 | Stalled      | chr1:155270338-155299704  | 27.367  |
| Abce1         | 94 | 0   | 1.566742 | 435  | 7.25     | 19.9714  | 20.6684  | Stalled      | chr8:82207340-82237639    | 28.3    |
| Vrk3          | 94 | 0   | 1.566742 | 230  | 3.833333 | 11.8818  | 9.948559 | Stalled      | chr7:52001998-52032884    | 28.887  |
| Nde1          | 94 | 0   | 1.566742 | 485  | 8.083333 | 30.3624  | 17.96028 | Stalled      | chr16:14161367-14193016   | 29.65   |
| Tln1          | 94 | 0   | 1.566742 | 676  | 11.26667 | 40.0382  | 9.029198 | Stalled      | chr4:43544384-43577455    | 31.072  |
| Top2a         | 94 | 0   | 1.566742 | 897  | 14.95    | 67.3156  | 9.458956 | Stalled      | chr11:98854260-98887503   | 31.244  |
| Sfxn1         | 94 | 0   | 1.566742 | 947  | 15.78333 | 16.1917  | 6.756743 | Stalled      | chr13:54165213-54203712   | 36.5    |
| Dbt           | 94 | 0   | 1.566742 | 322  | 5.366667 | 3.74091  | 12.53968 | Stalled      | chr3:116213996-116252899  | 36.904  |
| Mtmr6         | 94 | 0   | 1.566742 | 154  | 2.566667 | 5.90118  | 19.57901 | Stalled      | chr14:60882064-60921207   | 37.144  |
| Agpat5        | 94 | 0   | 1.566742 | 333  | 5.55     | 6.8605   | 44.34616 | Stalled      | chr8:18844278-18884413    | 38.136  |
| Asb7          | 94 | 0   | 1.566742 | 224  | 3.733333 | 3.0434   | 22.32496 | Stalled      | chr7:73789456-73836447    | 44.992  |
| Stambp1       | 94 | 0   | 1.566742 | 497  | 8.283333 | 7.36584  | 21.62445 | Stalled      | chr19:34264759-34314818   | 48.06   |
| Dnajb6        | 94 | 0   | 1.566742 | 871  | 14.51667 | 12.7243  | 19.60482 | Stalled      | chr5:30060437-30113018    | 50.582  |
| BC061194      | 94 | 0   | 1.566742 | 36   | 0.6      | 0.228992 | 1.738097 | Unclassified | chr2:18618648-18671232    | 50.585  |
| Hspbp1        | 94 | 0   | 1.566742 | 307  | 5.116667 | 2.06648  | 17.71547 | Stalled      | chr16:35768471-35828548   | 58.078  |
| Tcerg1        | 94 | 0   | 1.566742 | 933  | 15.55    | 19.6295  | 14.23186 | Stalled      | chr18:42669140-42735439   | 64.3    |
| Anapc10       | 94 | 0   | 1.566742 | 142  | 2.366667 | 0.679037 | 104.9525 | Stalled      | chr8:82233718-82301220    | 65.503  |
| Acpl2         | 94 | 0   | 1.566742 | 216  | 3.6      | 0.81323  | 31.4892  | Stalled      | chr9:96723761-96791841    | 66.081  |
| Cicn3         | 94 | 0   | 1.566742 | 640  | 10.66667 | 12.1831  | 44.04805 | Stalled      | chr8:63389185-63464108    | 72.924  |
| 38969         | 94 | 0   | 1.566742 | 162  | 2.7      | 3.76517  | 170.7781 | Stalled      | chr10:58604374-58686595   | 80.222  |
| Sulf2         | 94 | 0   | 1.566742 | 395  | 6.583333 | 0.233255 | 0.855794 | Unclassified | chr2:165898588-165983156  | 82.569  |
| Glccl1        | 94 | 195 | 1.566742 | 373  | 6.216667 | 4.63033  | 94.52467 | Stalled      | chr6:8457595-8547548      | 87.954  |
| Prep          | 94 | 0   | 1.566742 | 1096 | 18.26667 | 17.0732  | 14.91653 | Stalled      | chr10:44785019-44878801   | 91.783  |
| Apc           | 94 | 0   | 1.566742 | 749  | 12.48333 | 2.76854  | 35.51852 | Stalled      | chr18:34378637-34481844   | 101.208 |
| Mcf2l         | 94 | 0   | 1.566742 | 186  | 3.1      | 0.074426 | 1.073318 | Unclassified | chr8:12913892-13020508    | 104.617 |
| Fam134b       | 94 | 0   | 1.566742 | 812  | 13.53333 | 6.23297  | 9.898399 | Stalled      | chr15:25771018-25903442   | 130.425 |
| Xpr1          | 94 | 0   | 1.566742 | 429  | 7.15     | 2.44362  | 19.76718 | Stalled      | chr1:157122786-157266574  | 141.789 |
| Ahrgap10      | 94 | 0   | 1.566742 | 964  | 16.06667 | 1.85165  | 16.24545 | Stalled      | chr8:79774264-80043806    | 267.543 |
| Hist1h4d      | 93 | 20  | 1.550074 | 0    | 0        | 11.6768  | 420      | Unclassified | chr13:23671470-23673782   | 0.313   |
| Mrp136        | 93 | 0   | 1.550074 | 2    | 0.033333 | 38.6072  | 17.09212 | Unclassified | chr13:73466456-73469626   | 1.171   |
| Apoa1b        | 93 | 0   | 1.550074 | 130  | 2.166667 | 35.1438  | 0.795715 | Elongating   | chr3:87860444-87864417    | 1.974   |
| Polr3d        | 93 | 0   | 1.550074 | 127  | 2.116667 | 11.2521  | 9.369943 | Stalled      | chr14:70838556-70845278   | 4.723   |
| Gtppb3        | 93 | 0   | 1.550074 | 48   | 0.8      | 12.6351  | 5.918431 | Stalled      | chr8:74010001-74017299    | 5.299   |
| Gar1          | 93 | 0   | 1.550074 | 147  | 2.45     | 64.7764  | 8.704883 | Stalled      | chr3:129527837-129536074  | 6.238   |
| Wnt10b        | 93 | 0   | 1.550074 | 542  | 9.033333 | 20.1721  | 0.877808 | Elongating   | chr15:98602183-98610581   | 6.399   |
| Sstr3         | 93 | 0   | 1.550074 | 19   | 0.316667 | 0.088096 | 1.499763 | Unclassified | chr15:78367444-78376775   | 7.332   |
| Med29         | 93 | 0   | 1.550074 | 216  | 3.6      | 5.95103  | 8.373328 | Stalled      | chr7:29170265-29179709    | 7.445   |
| Map1lc3b      | 93 | 0   | 1.550074 | 92   | 1.533333 | 10.6757  | 16.62256 | Stalled      | chr8:124112367-124121947  | 7.581   |
| Prrt3         | 93 | 0   | 1.550074 | 227  | 3.783333 | 1.20606  | 0.086319 | Stalled      | chr6:113444088-113453812  | 7.725   |
| 2900010J23Rik | 93 | 0   | 1.550074 | 150  | 2.5      | 108.705  | 14.55171 | Stalled      | chr2:32134335-32145588    | 9.254   |
| Naca          | 93 | 0   | 1.550074 | 1020 | 17       | 209.927  | 4.20368  | Stalled      | chr10:127470401-127485693 | 13.293  |
| Zfp759        | 93 | 0   | 1.550074 | 16   | 0.266667 | 0.80659  | 21.54998 | Stalled      | chr13:67227163-67242723   | 13.561  |
| Sfrs13a       | 93 | 0   | 1.550074 | 338  | 5.633333 | 15.5802  | 17.85473 | Stalled      | chr4:135410006-135425814  | 13.809  |
| Syce2         | 93 | 0   | 1.550074 | 110  | 1.833333 | 12.8341  | 9.224607 | Stalled      | chr8:87394009-87411345    | 15.337  |
| Ubqln4        | 93 | 0   | 1.550074 | 177  | 2.95     | 13.6393  | 16.18281 | Stalled      | chr3:88355637-88373647    | 16.011  |
| Mrps5         | 93 | 0   | 1.550074 | 160  | 2.666667 | 14.722   | 16.04403 | Stalled      | chr2:127411161-127429722  | 16.562  |
| Hn1l          | 93 | 0   | 1.550074 | 257  | 4.283333 | 7.55747  | 18.8348  | Stalled      | chr17:25079414-25099568   | 18.155  |
| Taf12         | 93 | 0   | 1.550074 | 114  | 1.9      | 13.3849  | 73.88197 | Stalled      | chr4:131828289-131849242  | 18.954  |
| Rwdd4a        | 93 | 0   | 1.550074 | 256  | 4.266667 | 9.51492  | 20.30447 | Stalled      | chr8:48616998-48638191    | 19.194  |
| Pex13         | 93 | 0   | 1.550074 | 74   | 1.233333 | 1.98378  | 45.11787 | Stalled      | chr11:23546478-23567935   | 19.458  |
| Rsph6a        | 93 | 0   | 1.550074 | 54   | 0.9      | 0.081598 | 6.18826  | Stalled      | chr7:19638035-19659795    | 19.761  |
| Actr6         | 93 | 0   | 1.550074 | 90   | 1.5      | 5.59016  | 20.85756 | Stalled      | chr10:89174717-89197040   | 20.324  |
| Cd5           | 93 | 0   | 1.550074 | 77   | 1.283333 | 0.563695 | 8.602295 | Stalled      | chr19:10792632-10815464   | 20.833  |
| Gtppb4        | 93 | 0   | 1.550074 | 444  | 7.4      | 23.1843  | 14.82962 | Stalled      | chr13:8971723-8997258     | 23.536  |

|                      |    |    |          |      |          |          |          |              |                           |         |
|----------------------|----|----|----------|------|----------|----------|----------|--------------|---------------------------|---------|
| <b>6330503K22Rik</b> | 93 | 0  | 1.550074 | 95   | 1.583333 | 3.55945  | 13.64103 | Stalled      | chr7:125854124-125880532  | 24.409  |
| <b>Mxra7</b>         | 93 | 0  | 1.550074 | 46   | 0.766667 | 0.252612 | 1.69768  | Unclassified | chr11:116664713-116691360 | 24.648  |
| <b>Ppil2</b>         | 93 | 0  | 1.550074 | 414  | 6.9      | 17.0465  | 9.352046 | Stalled      | chr16:17086648-17113306   | 24.659  |
| <b>Dnajb4</b>        | 93 | 0  | 1.550074 | 285  | 4.75     | 7.57633  | 57.33244 | Stalled      | chr3:151846918-151875263  | 26.346  |
| <b>Fubp1</b>         | 93 | 0  | 1.550074 | 820  | 13.66667 | 17.0231  | 21.97107 | Stalled      | chr3:151871421-151899794  | 26.374  |
| <b>Idh1</b>          | 93 | 0  | 1.550074 | 127  | 2.116667 | 6.96891  | 35.09482 | Stalled      | chr1:65205189-65235053    | 27.865  |
| <b>Osbp</b>          | 93 | 45 | 1.550074 | 264  | 4.4      | 15.1556  | 15.5427  | Stalled      | chr19:12038333-12068604   | 28.272  |
| <b>Enoph1</b>        | 93 | 0  | 1.550074 | 330  | 5.5      | 13.6641  | 26.15958 | Stalled      | chr5:100467012-100497783  | 28.772  |
| <b>Gtf2e1</b>        | 93 | 0  | 1.550074 | 214  | 3.566667 | 6.40595  | 39.82982 | Stalled      | chr16:37509881-37541855   | 29.975  |
| <b>Golp31</b>        | 93 | 0  | 1.550074 | 100  | 1.666667 | 7.1293   | 8.834087 | Stalled      | chr3:95390880-95423164    | 30.285  |
| <b>Rabl3</b>         | 93 | 0  | 1.550074 | 176  | 2.933333 | 2.95988  | 49.17627 | Stalled      | chr16:37537979-37572471   | 32.493  |
| <b>Adss</b>          | 93 | 0  | 1.550074 | 317  | 5.283333 | 16.0785  | 30.45105 | Stalled      | chr1:179693308-179728640  | 33.333  |
| <b>D030016E14Rik</b> | 93 | 0  | 1.550074 | 203  | 3.383333 | 5.78782  | 50.05119 | Stalled      | chr8:48575481-48620824    | 43.344  |
| <b>Piwil2</b>        | 93 | 0  | 1.550074 | 175  | 2.916667 | 0.511224 | 0.964651 | Unclassified | chr14:70772286-70830901   | 56.616  |
| <b>Taf1b</b>         | 93 | 0  | 1.550074 | 490  | 8.166667 | 6.08725  | 17.40773 | Stalled      | chr12:25181445-25243436   | 59.992  |
| <b>Ift57</b>         | 93 | 0  | 1.550074 | 134  | 2.233333 | 2.77491  | 25.43354 | Stalled      | chr16:49697406-49765239   | 65.834  |
| <b>Pus10</b>         | 93 | 0  | 1.550074 | 585  | 9.75     | 8.35161  | 24.40057 | Stalled      | chr11:23563975-23632876   | 66.902  |
| <b>Rcor1</b>         | 93 | 0  | 1.550074 | 812  | 13.53333 | 6.63796  | 13.9503  | Stalled      | chr12:112276008-112351597 | 73.59   |
| <b>Wars2</b>         | 93 | 0  | 1.550074 | 255  | 4.25     | 1.71124  | 45.02373 | Stalled      | chr3:98943012-99024126    | 79.115  |
| <b>E2f3</b>          | 93 | 0  | 1.550074 | 2638 | 43.96667 | 5.85044  | 11.8465  | Stalled      | chr13:29998443-30079932   | 79.49   |
| <b>Lrpprc</b>        | 93 | 0  | 1.550074 | 1161 | 19.35    | 9.58773  | 16.83298 | Stalled      | chr17:85104586-85192126   | 85.541  |
| <b>1700040L02Rik</b> | 93 | 0  | 1.550074 | 360  | 6        | 2.42247  | 25.73052 | Stalled      | chr10:67893703-68006623   | 110.921 |
| <b>Ahi1</b>          | 93 | 0  | 1.550074 | 452  | 7.533333 | 1.3764   | 39.22534 | Stalled      | chr10:20670390-20800235   | 127.846 |
| <b>Atbpd4</b>        | 93 | 0  | 1.550074 | 340  | 5.666667 | 4.10571  | 85.81685 | Stalled      | chr2:114342153-114482664  | 138.512 |
| <b>Atp8b4</b>        | 93 | 0  | 1.550074 | 226  | 3.766667 | 0.271208 | 3.858209 | Unclassified | chr2:126146708-126319289  | 170.582 |
| <b>Pds2</b>          | 93 | 0  | 1.550074 | 892  | 14.86667 | 11.378   | 80.84491 | Stalled      | chr10:42939291-43160054   | 218.764 |
| <b>Ldlrad3</b>       | 93 | 0  | 1.550074 | 543  | 9.05     | 0.167446 | 15.41303 | Stalled      | chr2:101790357-102028534  | 236.178 |
| <b>Iggap2</b>        | 93 | 0  | 1.550074 | 434  | 7.233333 | 0.502889 | 13.98593 | Stalled      | chr13:96397131-96663877   | 264.747 |
| <b>Lsm4d1</b>        | 92 | 0  | 1.533407 | 0    | 0        | 66.9317  | 234      | Unclassified | chr11:69207292-69210173   | 0.882   |
| <b>Banf1</b>         | 92 | 0  | 1.533407 | 52   | 0.866667 | 128.706  | 10.27764 | Stalled      | chr19:5364639-5368645     | 2.007   |
| <b>Dusp23</b>        | 92 | 0  | 1.533407 | 3    | 0.05     | 6.49333  | 29.83789 | Stalled      | chr1:174560899-174565105  | 2.207   |
| <b>AA467197</b>      | 92 | 0  | 1.533407 | 7    | 0.116667 | 1.24158  | 4.529322 | Stalled      | chr2:122461622-122466812  | 3.191   |
| <b>1700020C11Rik</b> | 92 | 0  | 1.533407 | 10   | 0.166667 | 6.63717  | 10.94009 | Stalled      | chr11:3991483-3997434     | 3.952   |
| <b>Eif5a</b>         | 92 | 0  | 1.533407 | 605  | 10.08333 | 402.702  | 3.212928 | Stalled      | chr11:69730213-69736888   | 4.676   |
| <b>Rabggtb</b>       | 92 | 0  | 1.533407 | 405  | 6.75     | 30.6127  | 1.235374 | Elongating   | chr3:153570252-153577167  | 4.916   |
| <b>Gnb2</b>          | 92 | 0  | 1.533407 | 226  | 3.766667 | 115.818  | 3.262318 | Stalled      | chr5:137969356-137976457  | 5.102   |
| <b>Fstl3</b>         | 92 | 0  | 1.533407 | 43   | 0.716667 | 1.71901  | 0.73618  | Unclassified | chr10:79238018-79245375   | 5.358   |
| <b>Tmem216</b>       | 92 | 0  | 1.533407 | 54   | 0.9      | 3.41424  | 8.528771 | Stalled      | chr19:10624955-10632728   | 5.774   |
| <b>Ccdc59</b>        | 92 | 0  | 1.533407 | 82   | 1.366667 | 21.7076  | 22.26403 | Stalled      | chr10:105276534-105284566 | 6.033   |
| <b>Trmt5</b>         | 92 | 0  | 1.533407 | 53   | 0.883333 | 3.39371  | 20.1922  | Stalled      | chr12:74381396-74389698   | 6.303   |
| <b>Fem1a</b>         | 92 | 57 | 1.533407 | 264  | 4.4      | 10.5577  | 4.33337  | Stalled      | chr17:56394215-56403031   | 6.817   |
| <b>Fbxl12</b>        | 92 | 0  | 1.533407 | 243  | 4.05     | 7.28989  | 5.934381 | Stalled      | chr9:20442230-20451211    | 6.982   |
| <b>Ccdc97</b>        | 92 | 0  | 1.533407 | 456  | 7.6      | 19.0291  | 4.031473 | Stalled      | chr7:26496135-26506072    | 7.938   |
| <b>Car3</b>          | 92 | 0  | 1.533407 | 32   | 0.533333 | 0.62028  | 0.196727 | Unclassified | chr3:14861537-14872373    | 8.837   |
| <b>Flot1</b>         | 92 | 0  | 1.533407 | 386  | 6.433333 | 16.2032  | 2.800462 | Stalled      | chr17:35958301-35969732   | 9.432   |
| <b>Hinfp</b>         | 92 | 0  | 1.533407 | 112  | 1.866667 | 5.70393  | 22.01653 | Stalled      | chr9:44103755-44115754    | 10      |
| <b>R3hcc1</b>        | 92 | 0  | 1.533407 | 101  | 1.683333 | 18.6048  | 7.318833 | Stalled      | chr14:70097111-70109387   | 10.277  |
| <b>Psmg1</b>         | 92 | 0  | 1.533407 | 80   | 1.333333 | 28.5039  | 41.88796 | Stalled      | chr16:96201541-96214510   | 10.97   |
| <b>Tmem170</b>       | 92 | 0  | 1.533407 | 35   | 0.583333 | 2.59852  | 28.25488 | Stalled      | chr8:114388797-114402575  | 11.779  |
| <b>Cdc6</b>          | 92 | 0  | 1.533407 | 573  | 9.55     | 10.7474  | 5.299479 | Stalled      | chr11:98767202-98785256   | 16.055  |
| <b>Ak2</b>           | 92 | 0  | 1.533407 | 1102 | 18.36667 | 280.893  | 3.748562 | Stalled      | chr4:128668508-128688773  | 18.266  |
| <b>D10Wsu52e</b>     | 92 | 0  | 1.533407 | 362  | 6.033333 | 68.3277  | 7.02136  | Stalled      | chr10:85401381-85422538   | 19.158  |
| <b>Ccdc157</b>       | 92 | 0  | 1.533407 | 142  | 2.366667 | 1.32933  | 22.80295 | Stalled      | chr11:4041126-4062296     | 19.171  |
| <b>Cops7b</b>        | 92 | 0  | 1.533407 | 183  | 3.05     | 9.30411  | 10.23338 | Stalled      | chr1:88481674-88503075    | 19.402  |
| <b>Ebp1</b>          | 92 | 0  | 1.533407 | 93   | 1.55     | 5.22615  | 28.47336 | Stalled      | chr14:61958599-61981282   | 20.684  |
| <b>Itgax</b>         | 92 | 0  | 1.533407 | 43   | 0.716667 | 0.06686  | 0.318445 | Unclassified | chr7:135271081-135294171  | 21.091  |
| <b>St6galnac6</b>    | 92 | 0  | 1.533407 | 481  | 8.016667 | 0        | 6.657597 | Stalled      | chr2:32453228-32476324    | 21.097  |
| <b>Ccdc28a</b>       | 92 | 0  | 1.533407 | 37   | 0.616667 | 5.2635   | 36.84233 | Stalled      | chr10:17933490-17956787   | 21.298  |
| <b>Mapk6</b>         | 92 | 62 | 1.533407 | 797  | 13.28333 | 15.8779  | 14.49828 | Stalled      | chr9:75234707-75259821    | 23.115  |
| <b>Naa50</b>         | 92 | 0  | 1.533407 | 238  | 3.966667 | 12.5259  | 28.30912 | Stalled      | chr16:44137921-44163477   | 23.557  |
| <b>Ccdc99</b>        | 92 | 0  | 1.533407 | 286  | 4.766667 | 11.3141  | 19.4815  | Stalled      | chr11:34622686-34649143   | 24.458  |
| <b>2310030N02Rik</b> | 92 | 0  | 1.533407 | 220  | 3.666667 | 8.91804  | 12.66485 | Stalled      | chr4:10978194-11005351    | 25.158  |
| <b>Ing3</b>          | 92 | 0  | 1.533407 | 185  | 3.083333 | 3.09875  | 27.42676 | Stalled      | chr6:21897614-21926037    | 26.424  |
| <b>Nop58</b>         | 92 | 0  | 1.533407 | 799  | 13.31667 | 44.8559  | 9.404206 | Stalled      | chr1:59739849-59768354    | 26.506  |
| <b>Tfg</b>           | 92 | 0  | 1.533407 | 146  | 2.433333 | 15.7872  | 41.45105 | Stalled      | chr16:56690444-56719467   | 27.024  |
| <b>Cyb5</b>          | 92 | 0  | 1.533407 | 248  | 4.133333 | 22.2741  | 13.25456 | Stalled      | chr18:85018805-85049255   | 28.451  |
| <b>Znhit6</b>        | 92 | 0  | 1.533407 | 217  | 3.616667 | 13.8517  | 16.24859 | Stalled      | chr3:145237171-145268209  | 29.039  |
| <b>Sh3glb1</b>       | 92 | 0  | 1.533407 | 437  | 7.283333 | 8.46605  | 8.215534 | Stalled      | chr3:144351807-144385287  | 31.481  |
| <b>Nufip2</b>        | 92 | 0  | 1.533407 | 802  | 13.36667 | 2.53122  | 19.65613 | Stalled      | chr11:77497640-77531468   | 31.829  |
| <b>Snupn</b>         | 92 | 0  | 1.533407 | 133  | 2.216667 | 3.48665  | 68.73145 | Stalled      | chr9:56796730-56831006    | 32.277  |
| <b>Zmpste24</b>      | 92 | 0  | 1.533407 | 286  | 4.766667 | 12.9881  | 19.70691 | Stalled      | chr4:120731842-120772848  | 39.007  |
| <b>Zfp395</b>        | 92 | 0  | 1.533407 | 281  | 4.683333 | 2.87656  | 10.41904 | Stalled      | chr14:65975512-66017767   | 40.256  |
| <b>Heatr1</b>        | 92 | 0  | 1.533407 | 762  | 12.7     | 12.6366  | 7.6106   | Stalled      | chr13:12485641-12531160   | 43.52   |
| <b>Zc3hav1</b>       | 92 | 0  | 1.533407 | 1777 | 29.61667 | 27.5434  | 15.18164 | Stalled      | chr6:38260496-38306603    | 44.108  |
| <b>Gm1060</b>        | 92 | 0  | 1.533407 | 55   | 0.916667 | 0.123586 | 1.044152 | Unclassified | chr5:30605913-30668993    | 61.081  |
| <b>Itgb3bp</b>       | 92 | 0  | 1.533407 | 91   | 1.516667 | 0.460986 | 42.84072 | Stalled      | chr4:99432092-99497809    | 63.718  |
| <b>BC067068</b>      | 92 | 0  | 1.533407 | 308  | 5.133333 | 4.24763  | 77.55753 | Stalled      | chr10:105200241-105280436 | 78.196  |
| <b>Rasgef1c</b>      | 92 | 0  | 1.533407 | 115  | 1.916667 | 0.148496 | 2.413535 | Unclassified | chr11:49713336-49793725   | 78.39   |
| <b>Mrpl11</b>        | 91 | 0  | 1.516739 | 29   | 0.483333 | 37.5189  | 3.67189  | Stalled      | chr19:4960314-4964943     | 2.63    |
| <b>2310016C08Rik</b> | 91 | 0  | 1.516739 | 36   | 0.6      | 9.48686  | 15.48131 | Stalled      | chr6:29220671-29225442    | 2.772   |
| <b>Vmac</b>          | 91 | 0  | 1.516739 | 22   | 0.366667 | 4.21849  | 6.971114 | Stalled      | chr17:56853354-56858344   | 2.991   |
| <b>Wdr55</b>         | 91 | 0  | 1.516739 | 91   | 1.516667 | 30.718   | 4.890661 | Stalled      | chr18:36917892-36923362   | 3.471   |
| <b>Rplp0</b>         | 91 | 0  | 1.516739 | 380  | 6.333333 | 940.176  | 4.459842 | Stalled      | chr5:116007475-116013736  | 4.262   |
| <b>Ppapdc1b</b>      | 91 | 0  | 1.516739 | 128  | 2.133333 | 16.0956  | 5.681048 | Stalled      | chr8:26828519-26835359    | 4.841   |
| <b>Sepx1</b>         | 91 | 0  | 1.516739 | 52   | 0.866667 | 31.86    | 14.47755 | Stalled      | chr17:24871586-24879723   | 6.138   |
| <b>6430531B16Rik</b> | 91 | 0  | 1.516739 | 34   | 0.566667 | 1.0484   | 1.935317 | Unclassified | chr7:147158201-147166654  | 6.454   |



|                      |    |    |          |      |          |          |          |              |                           |         |
|----------------------|----|----|----------|------|----------|----------|----------|--------------|---------------------------|---------|
| <b>Abhd8</b>         | 91 | 0  | 1.516739 | 31   | 0.516667 | 11.2784  | 4.353283 | Stalled      | chr8:73980598-73989556    | 6.959   |
| <b>Rwdd2b</b>        | 91 | 0  | 1.516739 | 45   | 0.75     | 6.43488  | 31.52086 | Stalled      | chr16:87433575-87442837   | 7.263   |
| <b>Cox19</b>         | 91 | 0  | 1.516739 | 120  | 2        | 21.6534  | 6.278394 | Stalled      | chr5:139813775-139823120  | 7.346   |
| <b>Suv420h2</b>      | 91 | 0  | 1.516739 | 189  | 3.15     | 22.2454  | 5.493411 | Stalled      | chr7:4689728-4699116      | 7.389   |
| <b>Nsa2</b>          | 91 | 0  | 1.516739 | 62   | 1.033333 | 10.0174  | 32.91758 | Stalled      | chr13:97899381-97909881   | 8.501   |
| <b>Rmi1</b>          | 91 | 0  | 1.516739 | 123  | 2.05     | 4.7565   | 38.94053 | Stalled      | chr13:58501957-58512510   | 8.554   |
| <b>Zfp239</b>        | 91 | 0  | 1.516739 | 59   | 0.983333 | 2.55029  | 9.501027 | Stalled      | chr6:117811094-117822784  | 9.691   |
| <b>Prdx6</b>         | 91 | 0  | 1.516739 | 236  | 3.933333 | 15.3349  | 10.09458 | Stalled      | chr1:163170242-163183297  | 11.056  |
| <b>Usf2</b>          | 91 | 0  | 1.516739 | 232  | 3.866667 | 29.1067  | 5.221908 | Stalled      | chr7:31730268-31743822    | 11.555  |
| <b>Taf6l</b>         | 91 | 0  | 1.516739 | 588  | 9.8      | 13.3592  | 2.30295  | Elongating   | chr19:8848981-8862753     | 11.773  |
| <b>1110004F10Rik</b> | 91 | 0  | 1.516739 | 98   | 1.633333 | 36.7243  | 26.57439 | Stalled      | chr7:123234893-123248724  | 11.832  |
| <b>Phb</b>           | 91 | 0  | 1.516739 | 159  | 2.65     | 26.0015  | 11.53579 | Stalled      | chr11:95526303-95542087   | 13.785  |
| <b>Alas1</b>         | 91 | 0  | 1.516739 | 200  | 3.333333 | 8.99733  | 15.99877 | Stalled      | chr9:106135785-106152285  | 14.501  |
| <b>1700025K23Rik</b> | 91 | 0  | 1.516739 | 18   | 0.3      | 1.43867  | 73.7621  | Stalled      | chr10:38838613-38855701   | 15.089  |
| <b>Gdx55</b>         | 91 | 0  | 1.516739 | 281  | 4.683333 | 8.38481  | 17.26166 | Stalled      | chr5:125000872-125018947  | 16.076  |
| <b>Gcxc</b>          | 91 | 0  | 1.516739 | 267  | 4.45     | 3.70377  | 8.33119  | Stalled      | chr6:72362326-72380701    | 16.376  |
| <b>Tube1</b>         | 91 | 0  | 1.516739 | 76   | 1.266667 | 4.37482  | 29.62167 | Stalled      | chr10:38851828-38870664   | 17.037  |
| <b>Adprhl1</b>       | 91 | 0  | 1.516739 | 38   | 0.633333 | 0.018779 | 5.04544  | Unclassified | chr8:13235661-13256162    | 18.502  |
| <b>Mtl5</b>          | 91 | 0  | 1.516739 | 48   | 0.8      | 1.30517  | 33.706   | Stalled      | chr19:3386868-3407785     | 18.918  |
| <b>Insrr</b>         | 91 | 0  | 1.516739 | 94   | 1.566667 | 1.12504  | 0.323704 | Unclassified | chr3:87598872-87620023    | 19.152  |
| <b>Det1</b>          | 91 | 0  | 1.516739 | 169  | 2.816667 | 4.31771  | 21.9591  | Stalled      | chr7:85972359-85994097    | 19.739  |
| <b>Rnf14</b>         | 91 | 0  | 1.516739 | 135  | 2.25     | 9.12065  | 24.74429 | Stalled      | chr18:38454288-38477501   | 21.214  |
| <b>Trim7</b>         | 91 | 0  | 1.516739 | 263  | 4.383333 | 6.59724  | 0.806092 | Stalled      | chr11:48637639-48663697   | 24.059  |
| <b>Scrn3</b>         | 91 | 0  | 1.516739 | 40   | 0.666667 | 0.307876 | 68.52836 | Stalled      | chr2:73148708-73175864    | 25.157  |
| <b>Dnajc27</b>       | 91 | 0  | 1.516739 | 334  | 5.566667 | 3.81371  | 22.43152 | Stalled      | chr12:4080611-4110602     | 27.992  |
| <b>Cir1</b>          | 91 | 0  | 1.516739 | 147  | 2.45     | 3.63479  | 29.19408 | Stalled      | chr2:73121928-73152649    | 28.722  |
| <b>Ewsr1</b>         | 91 | 0  | 1.516739 | 1016 | 16.93333 | 95.8418  | 12.99408 | Stalled      | chr11:4969690-5001080     | 29.391  |
| <b>Brd3</b>          | 91 | 0  | 1.516739 | 469  | 7.816667 | 9.51488  | 8.82001  | Stalled      | chr2:27301100-27333193    | 30.094  |
| <b>Heatr6</b>        | 91 | 0  | 1.516739 | 348  | 5.8      | 4.15312  | 16.60109 | Stalled      | chr11:83565138-83597256   | 30.119  |
| <b>Taf15</b>         | 91 | 0  | 1.516739 | 529  | 8.816667 | 80.4096  | 16.26953 | Stalled      | chr11:83284609-83320242   | 33.634  |
| <b>Fbxo32</b>        | 91 | 0  | 1.516739 | 98   | 1.633333 | 3.19139  | 17.18247 | Stalled      | chr15:58011633-58048433   | 34.801  |
| <b>Atp1a4</b>        | 91 | 0  | 1.516739 | 65   | 1.083333 | 0.105516 | 0.685767 | Unclassified | chr1:174153639-174190555  | 34.917  |
| <b>Fnbp4</b>         | 91 | 0  | 1.516739 | 921  | 15.35    | 23.5434  | 9.862737 | Stalled      | chr2:90583526-90621177    | 35.652  |
| <b>Thoc1</b>         | 91 | 0  | 1.516739 | 424  | 7.066667 | 5.86418  | 27.92126 | Stalled      | chr18:9956177-9995482     | 37.306  |
| <b>Klh120</b>        | 91 | 0  | 1.516739 | 189  | 3.15     | 6.06618  | 37.71185 | Stalled      | chr1:163018508-163063610  | 43.103  |
| <b>Sei1</b>          | 91 | 0  | 1.516739 | 702  | 11.7     | 18.1821  | 13.41389 | Stalled      | chr12:93044482-93089597   | 43.116  |
| <b>Gfm2</b>          | 91 | 0  | 1.516739 | 450  | 7.5      | 10.4331  | 26.26978 | Stalled      | chr13:97905891-97951150   | 43.26   |
| <b>Msh4</b>          | 91 | 0  | 1.516739 | 291  | 4.85     | 0.073085 | 43.18043 | Stalled      | chr3:153520110-153571102  | 48.993  |
| <b>Zc3h6</b>         | 91 | 0  | 1.516739 | 250  | 4.166667 | 1.77527  | 92.08268 | Stalled      | chr2:128791137-128844299  | 51.163  |
| <b>Trappc10</b>      | 91 | 0  | 1.516739 | 709  | 11.81667 | 6.91393  | 8.546045 | Stalled      | chr10:77649470-77709387   | 57.918  |
| <b>LOC547349</b>     | 91 | 0  | 1.516739 | 597  | 9.95     | 0        | 10.4631  | Stalled      | chr17:35400723-35462354   | 59.632  |
| <b>Atf7ip</b>        | 91 | 0  | 1.516739 | 1290 | 21.5     | 11.2801  | 12.26346 | Stalled      | chr6:136465371-136555900  | 88.53   |
| <b>Sap130</b>        | 91 | 0  | 1.516739 | 672  | 11.2     | 9.96444  | 28.85425 | Stalled      | chr18:31792036-31882715   | 88.68   |
| <b>Rbpms</b>         | 91 | 0  | 1.516739 | 322  | 5.366667 | 1.16815  | 5.30839  | Stalled      | chr8:34893115-35042313    | 147.199 |
| <b>Asp1</b>          | 91 | 0  | 1.516739 | 2862 | 47.7     | 9.3912   | 1.115739 | Stalled      | chr15:63920100-64216481   | 294.382 |
| <b>Fars2</b>         | 91 | 0  | 1.516739 | 1424 | 23.73333 | 10.8853  | 32.74903 | Stalled      | chr13:36207279-36629462   | 420.184 |
| <b>Dpm2</b>          | 90 | 0  | 1.500072 | 66   | 1.1      | 19.0078  | 4.356199 | Stalled      | chr2:32424377-32429091    | 2.715   |
| <b>Lsm3</b>          | 90 | 0  | 1.500072 | 121  | 2.016667 | 32.7892  | 9.356759 | Stalled      | chr6:91464028-91472614    | 6.587   |
| <b>Tsfm</b>          | 90 | 0  | 1.500072 | 90   | 1.5      | 18.0913  | 15.89172 | Stalled      | chr10:126459387-126469870 | 8.484   |
| <b>Mapk8ip2</b>      | 90 | 0  | 1.500072 | 18   | 0.3      | 0.163011 | 2.656263 | Unclassified | chr15:89282341-89292877   | 8.537   |
| <b>Irg1</b>          | 90 | 0  | 1.500072 | 121  | 2.016667 | 1.55486  | 1.454011 | Elongating   | chr14:103444228-103455790 | 9.563   |
| <b>Zbtb8os</b>       | 90 | 0  | 1.500072 | 99   | 1.65     | 18.3884  | 24.23118 | Stalled      | chr4:129011269-129024273  | 11.005  |
| <b>Gins4</b>         | 90 | 0  | 1.500072 | 116  | 1.933333 | 18.781   | 11.97049 | Stalled      | chr8:24337081-24350140    | 11.06   |
| <b>Fpgs</b>          | 90 | 0  | 1.500072 | 211  | 3.516667 | 12.1382  | 11.11327 | Stalled      | chr2:32538128-32551695    | 11.568  |
| <b>2610318N02Rik</b> | 90 | 0  | 1.500072 | 290  | 4.833333 | 7.89968  | 7.05191  | Stalled      | chr16:17113490-17127199   | 11.71   |
| <b>Cpsf1</b>         | 90 | 0  | 1.500072 | 316  | 5.266667 | 20.4682  | 4.818057 | Stalled      | chr15:76426238-76440021   | 11.784  |
| <b>Sic20a1</b>       | 90 | 0  | 1.500072 | 283  | 4.716667 | 14.9168  | 21.20137 | Stalled      | chr2:129022508-129037346  | 12.839  |
| <b>Ddx18</b>         | 90 | 0  | 1.500072 | 288  | 4.8      | 15.0887  | 6.809411 | Stalled      | chr1:123450413-123466557  | 14.145  |
| <b>Serinc1</b>       | 90 | 0  | 1.500072 | 127  | 2.116667 | 13.4028  | 22.9531  | Stalled      | chr10:57235583-57254335   | 16.753  |
| <b>Tbp</b>           | 90 | 0  | 1.500072 | 150  | 2.5      | 6.76569  | 24.33362 | Stalled      | chr17:15634851-15654391   | 17.541  |
| <b>Dpcd</b>          | 90 | 0  | 1.500072 | 260  | 4.333333 | 9.95483  | 5.182865 | Stalled      | chr19:45633104-45652777   | 17.674  |
| <b>Abca7</b>         | 90 | 0  | 1.500072 | 244  | 4.066667 | 10.719   | 1.429719 | Elongating   | chr10:79458359-79478317   | 17.959  |
| <b>Ets2</b>          | 90 | 0  | 1.500072 | 162  | 2.7      | 1.79156  | 16.40047 | Stalled      | chr16:95922013-95942654   | 18.642  |
| <b>Ctdsp2</b>        | 90 | 0  | 1.500072 | 248  | 4.133333 | 10.5351  | 2.492284 | Elongating   | chr10:126413772-126437031 | 21.26   |
| <b>E130120F12Rik</b> | 90 | 46 | 1.500072 | 55   | 0.916667 | 1.27155  | 21.53989 | Stalled      | chr13:67440244-67463508   | 21.265  |
| <b>Ociad1</b>        | 90 | 0  | 1.500072 | 371  | 6.183333 | 61.3774  | 17.83365 | Stalled      | chr5:73682032-73705316    | 21.285  |
| <b>Fam76a</b>        | 90 | 0  | 1.500072 | 125  | 2.083333 | 4.02836  | 27.44256 | Stalled      | chr4:132455128-132480466  | 23.339  |
| <b>Aimp1</b>         | 90 | 0  | 1.500072 | 203  | 3.383333 | 33.99    | 25.22498 | Stalled      | chr3:132323461-132348843  | 23.383  |
| <b>Chmp2b</b>        | 90 | 0  | 1.500072 | 80   | 1.333333 | 6.78373  | 26.40173 | Stalled      | chr16:65539377-65564942   | 23.566  |
| <b>Ddx19b</b>        | 90 | 0  | 1.500072 | 146  | 2.433333 | 6.73654  | 22.52436 | Stalled      | chr8:113527087-113553664  | 24.578  |
| <b>Klf3</b>          | 90 | 0  | 1.500072 | 531  | 8.85     | 8.84653  | 10.44364 | Stalled      | chr5:65192761-65221368    | 26.608  |
| <b>Capn1</b>         | 90 | 0  | 1.500072 | 242  | 4.033333 | 20.8985  | 7.297254 | Stalled      | chr19:5988544-6017247     | 26.704  |
| <b>Tmem39a</b>       | 90 | 0  | 1.500072 | 386  | 6.433333 | 16.5835  | 19.30425 | Stalled      | chr16:38560971-38591497   | 28.527  |
| <b>Tsen2</b>         | 90 | 0  | 1.500072 | 151  | 2.516667 | 3.20622  | 43.53949 | Stalled      | chr6:115492721-115528354  | 33.634  |
| <b>Mrp148</b>        | 90 | 0  | 1.500072 | 197  | 3.283333 | 13.1754  | 16.64996 | Stalled      | chr7:107697630-107733644  | 34.015  |
| <b>Rab40c</b>        | 90 | 0  | 1.500072 | 371  | 6.183333 | 6.03006  | 6.016342 | Stalled      | chr17:26019059-26058659   | 37.601  |
| <b>Cep63</b>         | 90 | 0  | 1.500072 | 373  | 6.216667 | 6.85832  | 54.0452  | Stalled      | chr9:102488907-102530454  | 39.548  |
| <b>Ccdc111</b>       | 90 | 0  | 1.500072 | 365  | 6.083333 | 2.29091  | 34.74038 | Stalled      | chr8:47660947-47704554    | 41.608  |
| <b>Tmem48</b>        | 90 | 0  | 1.500072 | 471  | 7.85     | 7.67603  | 12.25866 | Stalled      | chr4:107038388-107086943  | 46.556  |
| <b>4933421E11Rik</b> | 90 | 0  | 1.500072 | 470  | 7.833333 | 7.18134  | 3.887197 | Stalled      | chr3:106485904-106539494  | 51.591  |
| <b>Dnaic1</b>        | 90 | 0  | 1.500072 | 77   | 1.283333 | 0.437362 | 37.33038 | Stalled      | chr4:41514826-41585190    | 68.365  |
| <b>Tbck</b>          | 90 | 0  | 1.500072 | 259  | 4.316667 | 2.51625  | 78.94237 | Stalled      | chr3:132345107-132459798  | 112.692 |
| <b>Pf20</b>          | 90 | 0  | 1.500072 | 1149 | 19.15    | 4.06283  | 28.49309 | Stalled      | chr2:156020382-156135689  | 113.308 |
| <b>Jmjd1c</b>        | 90 | 0  | 1.500072 | 1452 | 24.2     | 6.71864  | 2.836848 | Elongating   | chr10:66588005-66719073   | 129.069 |
| <b>Ufsp1</b>         | 89 | 0  | 1.483404 | 0    | 0        | 5.22361  | 430      | Unclassified | chr5:137733896-137736892  | 0.997   |
| <b>Rps2</b>          | 89 | 0  | 1.483404 | 140  | 2.333333 | 127.896  | 4.494942 | Unclassified | chr17:24855007-24858871   | 1.865   |



|                      |    |    |          |      |          |          |          |              |                           |         |
|----------------------|----|----|----------|------|----------|----------|----------|--------------|---------------------------|---------|
| <b>Zbtb9</b>         | 89 | 0  | 1.483404 | 53   | 0.883333 | 7.11301  | 14.87486 | Stalled      | chr17:27108123-27113148   | 3.026   |
| <b>Bat4</b>          | 89 | 0  | 1.483404 | 32   | 0.533333 | 15.5351  | 21.30226 | Stalled      | chr17:35256440-35261760   | 3.321   |
| <b>Pex12</b>         | 89 | 0  | 1.483404 | 154  | 2.566667 | 3.54549  | 10.91315 | Stalled      | chr11:83108146-83114479   | 4.334   |
| <b>Csnk2b</b>        | 89 | 0  | 1.483404 | 76   | 1.266667 | 59.3355  | 15.849   | Stalled      | chr17:35253139-35260392   | 5.254   |
| <b>2010107E04Rik</b> | 89 | 0  | 1.483404 | 112  | 1.866667 | 29.2083  | 8.210972 | Stalled      | chr12:113199586-113207188 | 5.603   |
| <b>Rhbdd3</b>        | 89 | 0  | 1.483404 | 140  | 2.333333 | 5.83319  | 17.9758  | Stalled      | chr11:4997440-5006094     | 6.655   |
| <b>B3gnt6</b>        | 89 | 0  | 1.483404 | 22   | 0.366667 | 1.08277  | 1.080108 | Unclassified | chr7:105340924-105349985  | 7.062   |
| <b>Ankzf1</b>        | 89 | 0  | 1.483404 | 49   | 0.816667 | 15.1096  | 17.65457 | Stalled      | chr1:75186708-75195960    | 7.253   |
| <b>Cdh24</b>         | 89 | 0  | 1.483404 | 74   | 1.233333 | 1.75682  | 28.261   | Stalled      | chr14:55250828-55262201   | 9.374   |
| <b>Psmd4</b>         | 89 | 0  | 1.483404 | 230  | 3.833333 | 76.7015  | 7.996383 | Stalled      | chr3:94836626-94848467    | 9.842   |
| <b>2500003M10Rik</b> | 89 | 0  | 1.483404 | 278  | 4.633333 | 37.9378  | 13.0349  | Stalled      | chr3:90302879-90315365    | 10.487  |
| <b>Atg9a</b>         | 89 | 0  | 1.483404 | 121  | 2.016667 | 7.43174  | 9.747465 | Stalled      | chr1:75177439-75190497    | 11.059  |
| <b>Dhrs4</b>         | 89 | 0  | 1.483404 | 61   | 1.016667 | 22.309   | 36.21846 | Stalled      | chr14:56095594-56109175   | 11.582  |
| <b>Parp2</b>         | 89 | 0  | 1.483404 | 165  | 2.75     | 14.3186  | 16.92927 | Stalled      | chr14:51425620-51440975   | 13.356  |
| <b>Pprc1</b>         | 89 | 0  | 1.483404 | 845  | 14.08333 | 12.951   | 5.39574  | Stalled      | chr19:46129028-46147399   | 16.372  |
| <b>Oit3</b>          | 89 | 0  | 1.483404 | 123  | 2.05     | 2.51448  | 0.253101 | Stalled      | chr10:58885707-58906527   | 18.821  |
| <b>3830406C13Rik</b> | 89 | 0  | 1.483404 | 97   | 1.616667 | 1.9446   | 32.12304 | Stalled      | chr14:13114722-13135745   | 19.024  |
| <b>Phyh</b>          | 89 | 0  | 1.483404 | 69   | 1.15     | 7.22428  | 42.30592 | Stalled      | chr2:4838041-4859789      | 19.749  |
| <b>Itpkc</b>         | 89 | 0  | 1.483404 | 196  | 3.266667 | 5.12839  | 27.56224 | Stalled      | chr7:27992188-28015616    | 21.429  |
| <b>Kif2c</b>         | 89 | 0  | 1.483404 | 261  | 4.35     | 13.8548  | 9.552216 | Stalled      | chr4:116832254-116857229  | 22.976  |
| <b>Mx2</b>           | 89 | 0  | 1.483404 | 604  | 10.06667 | 2.28691  | 7.133449 | Stalled      | chr16:97755687-97782508   | 24.822  |
| <b>Hnrnp1</b>        | 89 | 0  | 1.483404 | 500  | 8.333333 | 27.8807  | 23.18236 | Stalled      | chr4:135864890-135896593  | 29.704  |
| <b>Ptgr2</b>         | 89 | 0  | 1.483404 | 134  | 2.233333 | 6.58415  | 65.89286 | Stalled      | chr12:85624263-85656782   | 30.52   |
| <b>Dhx30</b>         | 89 | 0  | 1.483404 | 845  | 14.08333 | 15.3391  | 0.069154 | Stalled      | chr9:109986823-110020086  | 31.264  |
| <b>Slc25a36</b>      | 89 | 0  | 1.483404 | 145  | 2.416667 | 2.38683  | 35.067   | Stalled      | chr9:96977429-97013460    | 34.032  |
| <b>Gtf2a1</b>        | 89 | 0  | 1.483404 | 993  | 16.55    | 1.81092  | 12.92772 | Stalled      | chr12:92793702-92830927   | 35.226  |
| <b>Rcbtb1</b>        | 89 | 0  | 1.483404 | 246  | 4.1      | 6.65861  | 27.05483 | Stalled      | chr14:59818064-59856102   | 36.039  |
| <b>Lanc12</b>        | 89 | 0  | 1.483404 | 172  | 2.866667 | 6.81139  | 9.172234 | Stalled      | chr6:57650448-57689443    | 36.996  |
| <b>Cdk5rap1</b>      | 89 | 0  | 1.483404 | 278  | 4.633333 | 4.96967  | 31.55695 | Stalled      | chr2:154161121-154200455  | 37.335  |
| <b>Ifi3</b>          | 89 | 0  | 1.483404 | 1294 | 21.56667 | 30.5218  | 8.390601 | Stalled      | chr9:21170446-21209805    | 37.36   |
| <b>Tfb1m</b>         | 89 | 0  | 1.483404 | 102  | 1.7      | 7.23285  | 75.74583 | Stalled      | chr17:3519255-3559713     | 38.459  |
| <b>Soat1</b>         | 89 | 0  | 1.483404 | 258  | 4.3      | 2.78773  | 13.86986 | Stalled      | chr1:158358238-158406459  | 46.222  |
| <b>Alg6</b>          | 89 | 0  | 1.483404 | 144  | 2.4      | 1.12356  | 34.35734 | Stalled      | chr4:99380320-99430151    | 47.832  |
| <b>Iars</b>          | 89 | 0  | 1.483404 | 716  | 11.93333 | 19.1641  | 17.99873 | Stalled      | chr13:49775498-49829636   | 52.139  |
| <b>Smarcal1</b>      | 89 | 0  | 1.483404 | 374  | 6.233333 | 4.67218  | 15.52033 | Stalled      | chr1:72627824-72683363    | 53.54   |
| <b>Map3k3</b>        | 89 | 0  | 1.483404 | 930  | 15.5     | 9.01515  | 11.26976 | Stalled      | chr11:105944215-106016748 | 70.534  |
| <b>Ccdc15</b>        | 89 | 0  | 1.483404 | 119  | 1.983333 | 2.63929  | 152.0862 | Stalled      | chr9:37083419-37157977    | 72.559  |
| <b>Arntl</b>         | 89 | 0  | 1.483404 | 592  | 9.866667 | 2.71359  | 29.53234 | Stalled      | chr7:120348978-120457636  | 106.659 |
| <b>Arhgap12</b>      | 89 | 0  | 1.483404 | 343  | 5.716667 | 2.78603  | 63.17282 | Stalled      | chr18:6024447-6138096     | 111.65  |
| <b>Pou2f1</b>        | 89 | 0  | 1.483404 | 1045 | 17.41667 | 3.22732  | 18.85166 | Stalled      | chr1:167805604-167934765  | 127.162 |
| <b>Hdac4</b>         | 89 | 0  | 1.483404 | 1775 | 29.58333 | 1.71145  | 2.265455 | Elongating   | chr1:93829331-94046970    | 215.64  |
| <b>Tasp1</b>         | 89 | 0  | 1.483404 | 565  | 9.416667 | 3.32221  | 81.57585 | Stalled      | chr2:139659215-139894496  | 233.282 |
| <b>Tomm6</b>         | 88 | 0  | 1.466737 | 19   | 0.316667 | 74.5311  | 10.56134 | Unclassified | chr17:47823594-47827335   | 1.742   |
| <b>Ftl1</b>          | 88 | 0  | 1.466737 | 99   | 1.65     | 147.122  | 2.975266 | Unclassified | chr7:52713313-52717256    | 1.944   |
| <b>1700066B19Rik</b> | 88 | 0  | 1.466737 | 242  | 4.033333 | 7.29124  | 0.058845 | Stalled      | chr18:35884642-35890523   | 3.882   |
| <b>Tob1</b>          | 88 | 0  | 1.466737 | 8    | 0.133333 | 3.54254  | 101.3333 | Stalled      | chr11:94070767-94076806   | 4.04    |
| <b>Mrto4</b>         | 88 | 0  | 1.466737 | 173  | 2.883333 | 23.0097  | 9.198552 | Stalled      | chr4:138903359-138910213  | 4.855   |
| <b>Snrpe</b>         | 88 | 0  | 1.466737 | 184  | 3.066667 | 73.5699  | 7.284714 | Stalled      | chr1:135500447-135508857  | 6.411   |
| <b>Med8</b>          | 88 | 0  | 1.466737 | 122  | 2.033333 | 12.6533  | 12.99276 | Stalled      | chr4:118079941-118088387  | 6.447   |
| <b>Gstt3</b>         | 88 | 0  | 1.466737 | 38   | 0.633333 | 8.29199  | 4.547072 | Stalled      | chr10:75236866-75246159   | 7.294   |
| <b>Asna1</b>         | 88 | 0  | 1.466737 | 114  | 1.9      | 51.9128  | 4.800696 | Stalled      | chr8:87541829-87551177    | 7.349   |
| <b>Pih1d2</b>        | 88 | 0  | 1.466737 | 16   | 0.266667 | 0        | 65.92652 | Stalled      | chr9:50423425-50433097    | 7.673   |
| <b>Lass2</b>         | 88 | 0  | 1.466737 | 296  | 4.933333 | 27.6071  | 7.044936 | Stalled      | chr3:95117173-95127490    | 8.318   |
| <b>Fahd2a</b>        | 88 | 0  | 1.466737 | 76   | 1.266667 | 4.12186  | 13.84635 | Stalled      | chr2:127261951-127272301  | 8.351   |
| <b>H47</b>           | 88 | 0  | 1.466737 | 295  | 4.916667 | 46.1383  | 11.33104 | Stalled      | chr7:73222534-7324291     | 9.758   |
| <b>Dyrk3</b>         | 88 | 0  | 1.466737 | 78   | 1.3      | 2.45529  | 13.07166 | Stalled      | chr1:133025017-133036811  | 9.795   |
| <b>Taf13</b>         | 88 | 0  | 1.466737 | 29   | 0.483333 | 2.22602  | 77.41802 | Stalled      | chr3:108372616-108384986  | 10.371  |
| <b>Ube216</b>        | 88 | 0  | 1.466737 | 27   | 0.45     | 5.80292  | 5.200403 | Stalled      | chr2:84636984-84650158    | 11.175  |
| <b>Nhlrc3</b>        | 88 | 0  | 1.466737 | 97   | 1.616667 | 4.55851  | 27.08003 | Stalled      | chr3:53255917-53269180    | 11.264  |
| <b>Em13</b>          | 88 | 0  | 1.466737 | 326  | 5.433333 | 14.7327  | 7.04687  | Stalled      | chr19:9002183-9016072     | 11.89   |
| <b>AU019823</b>      | 88 | 0  | 1.466737 | 212  | 3.533333 | 3.3619   | 9.655649 | Stalled      | chr9:50413344-50427569    | 12.226  |
| <b>Sh3bp1</b>        | 88 | 0  | 1.466737 | 166  | 2.766667 | 16.3138  | 4.640228 | Stalled      | chr15:78728215-78742482   | 12.268  |
| <b>Zfp825</b>        | 88 | 0  | 1.466737 | 17   | 0.283333 | 2.46786  | 87.13129 | Stalled      | chr13:74617504-74633398   | 13.895  |
| <b>BC019943</b>      | 88 | 46 | 1.466737 | 506  | 8.433333 | 15.2282  | 11.70338 | Stalled      | chr8:32258787-32275175    | 14.389  |
| <b>Prom2</b>         | 88 | 0  | 1.466737 | 22   | 0.366667 | 0.018205 | 1.139063 | Unclassified | chr2:127352688-127369153  | 14.466  |
| <b>Utp11l</b>        | 88 | 0  | 1.466737 | 147  | 2.45     | 38.9726  | 11.66546 | Stalled      | chr4:124356007-124372798  | 14.792  |
| <b>Mrps31</b>        | 88 | 0  | 1.466737 | 162  | 2.7      | 8.13235  | 12.75415 | Stalled      | chr8:23519811-23540137    | 18.327  |
| <b>Npc2</b>          | 88 | 0  | 1.466737 | 382  | 6.366667 | 47.0861  | 13.92783 | Stalled      | chr12:86095508-86116062   | 18.555  |
| <b>Prkrip1</b>       | 88 | 0  | 1.466737 | 376  | 6.266667 | 13.6501  | 6.751666 | Stalled      | chr5:136656226-136676824  | 18.599  |
| <b>Sfrs12ip1</b>     | 88 | 0  | 1.466737 | 106  | 1.766667 | 7.39351  | 20.35383 | Stalled      | chr13:105605318-105628739 | 21.422  |
| <b>Tk2</b>           | 88 | 0  | 1.466737 | 378  | 6.3      | 3.69478  | 10.83033 | Stalled      | chr8:106750590-106774458  | 21.869  |
| <b>I7Rn6</b>         | 88 | 0  | 1.466737 | 72   | 1.2      | 15.9885  | 35.40923 | Stalled      | chr7:97067198-97091695    | 22.498  |
| <b>Rnpc3</b>         | 88 | 0  | 1.466737 | 172  | 2.866667 | 3.92905  | 56.25381 | Stalled      | chr3:113307984-113335067  | 25.084  |
| <b>Vps26b</b>        | 88 | 0  | 1.466737 | 120  | 2        | 3.56645  | 27.55366 | Stalled      | chr9:26812087-26839679    | 25.593  |
| <b>C230096C10Rik</b> | 88 | 0  | 1.466737 | 346  | 5.766667 | 4.81491  | 26.82295 | Stalled      | chr4:138906507-138934645  | 26.139  |
| <b>Anxa5</b>         | 88 | 0  | 1.466737 | 91   | 1.516667 | 13.7598  | 39.95571 | Stalled      | chr3:36347847-36376809    | 26.963  |
| <b>Hpgds</b>         | 88 | 0  | 1.466737 | 513  | 8.55     | 3.35461  | 5.195088 | Stalled      | chr6:65067287-65096724    | 27.438  |
| <b>Dntt</b>          | 88 | 0  | 1.466737 | 94   | 1.566667 | 0.191935 | 2.136014 | Unclassified | chr19:41101764-41134015   | 30.252  |
| <b>Nbn</b>           | 88 | 0  | 1.466737 | 398  | 6.633333 | 5.42217  | 27.3433  | Stalled      | chr4:15883113-15919736    | 34.624  |
| <b>Trap1</b>         | 88 | 0  | 1.466737 | 576  | 9.6      | 30.3272  | 21.51791 | Stalled      | chr16:4039976-4079810     | 37.835  |
| <b>Rad23b</b>        | 88 | 0  | 1.466737 | 726  | 12.1     | 34.4989  | 19.33131 | Stalled      | chr4:55360913-55405109    | 42.197  |
| <b>Rftn2</b>         | 88 | 0  | 1.466737 | 242  | 4.033333 | 1.88306  | 1.682042 | Unclassified | chr1:55227003-55285626    | 56.624  |
| <b>Ncapd3</b>        | 88 | 0  | 1.466737 | 515  | 8.583333 | 5.95666  | 20.26789 | Stalled      | chr9:26835759-26902900    | 65.142  |
| <b>Eif2b3</b>        | 88 | 0  | 1.466737 | 400  | 6.666667 | 10.6158  | 31.48181 | Stalled      | chr4:116690012-116759457  | 67.446  |
| <b>Rev1</b>          | 88 | 0  | 1.466737 | 709  | 11.81667 | 3.06568  | 17.49816 | Stalled      | chr1:38109630-38188507    | 76.878  |
| <b>Whrn</b>          | 88 | 0  | 1.466737 | 418  | 6.966667 | 3.56774  | 8.517897 | Stalled      | chr4:63075943-63158985    | 81.043  |

|                      |    |    |          |      |          |          |          |              |                           |         |
|----------------------|----|----|----------|------|----------|----------|----------|--------------|---------------------------|---------|
| <b>Nln</b>           | 88 | 0  | 1.466737 | 307  | 5.116667 | 2.70501  | 23.67373 | Stalled      | chr13:104813518-104901694 | 86.177  |
| <b>Sdcccag10</b>     | 88 | 0  | 1.466737 | 628  | 10.46667 | 12.2765  | 30.89902 | Stalled      | chr13:105421406-105609033 | 185.628 |
| <b>Fhit</b>          | 88 | 0  | 1.466737 | 1260 | 21       | 0.973524 | 10.10015 | Stalled      | chr14:10382607-11996546   | 1611.94 |
| <b>Ctxn1</b>         | 87 | 0  | 1.450069 | 17   | 0.283333 | 0.899024 | 4.788429 | Unclassified | chr8:4257645-4261274      | 1.63    |
| <b>Mrp63</b>         | 87 | 0  | 1.450069 | 49   | 0.816667 | 23.2472  | 14.27148 | Stalled      | chr14:58443075-58447582   | 2.508   |
| <b>Tuba1a</b>        | 87 | 0  | 1.450069 | 16   | 0.266667 | 0        | 37.72727 | Stalled      | chr15:98780277-98785932   | 3.656   |
| <b>BC031181</b>      | 87 | 0  | 1.450069 | 31   | 0.516667 | 47.3815  | 43.87307 | Stalled      | chr18:75163553-75169587   | 4.035   |
| <b>Pigc</b>          | 87 | 0  | 1.450069 | 31   | 0.516667 | 1.98772  | 18.2139  | Stalled      | chr1:163897318-163903566  | 4.249   |
| <b>Sic34a3</b>       | 87 | 0  | 1.450069 | 14   | 0.233333 | 0.088563 | 0        | Unclassified | chr2:25084417-25091727    | 5.311   |
| <b>Nxn11</b>         | 87 | 0  | 1.450069 | 22   | 0.366667 | 0.32235  | 0.188072 | Unclassified | chr8:74084453-74092548    | 6.096   |
| <b>Lig4</b>          | 87 | 0  | 1.450069 | 19   | 0.316667 | 3.86829  | 21.39025 | Stalled      | chr8:9970019-9978323      | 6.305   |
| <b>Tmem171</b>       | 87 | 0  | 1.450069 | 22   | 0.366667 | 0.443547 | 1.026525 | Unclassified | chr13:99456192-99466786   | 8.595   |
| <b>Narfl</b>         | 87 | 0  | 1.450069 | 225  | 3.75     | 8.14007  | 4.14053  | Stalled      | chr17:25908720-25920277   | 9.558   |
| <b>Rasip1</b>        | 87 | 0  | 1.450069 | 134  | 2.233333 | 1.736    | 1.16848  | Stalled      | chr7:52880906-52894462    | 11.557  |
| <b>Tfip11</b>        | 87 | 0  | 1.450069 | 479  | 7.983333 | 16.166   | 4.328695 | Stalled      | chr5:112753388-112767093  | 11.706  |
| <b>Dact3</b>         | 87 | 0  | 1.450069 | 72   | 1.2      | 2.11629  | 4.501048 | Stalled      | chr7:17458665-17472650    | 11.986  |
| <b>Ctbs</b>          | 87 | 0  | 1.450069 | 42   | 0.7      | 2.80603  | 44.40299 | Stalled      | chr3:146111456-146128735  | 15.28   |
| <b>Wsb1</b>          | 87 | 0  | 1.450069 | 363  | 6.05     | 20.7576  | 14.72038 | Stalled      | chr11:79052883-79070197   | 15.315  |
| <b>Nosip</b>         | 87 | 0  | 1.450069 | 289  | 4.816667 | 19.4021  | 9.370565 | Stalled      | chr7:52315798-52333873    | 16.076  |
| <b>Atpaf2</b>        | 87 | 0  | 1.450069 | 186  | 3.1      | 14.4531  | 17.28192 | Stalled      | chr11:60214127-60232601   | 16.475  |
| <b>Man1b1</b>        | 87 | 0  | 1.450069 | 456  | 7.6      | 18.0967  | 11.20416 | Stalled      | chr2:25186275-25207732    | 19.458  |
| <b>F630043A04Rik</b> | 87 | 0  | 1.450069 | 185  | 3.083333 | 5.46094  | 42.6714  | Stalled      | chr14:58425397-58447000   | 19.604  |
| <b>Pef1</b>          | 87 | 0  | 1.450069 | 232  | 3.866667 | 9.9554   | 7.627156 | Stalled      | chr4:129782799-129805378  | 20.58   |
| <b>Bco2</b>          | 87 | 0  | 1.450069 | 119  | 1.983333 | 1.18555  | 1.80386  | Unclassified | chr9:50341191-50365243    | 22.053  |
| <b>Mxd1</b>          | 87 | 0  | 1.450069 | 176  | 2.933333 | 1.90806  | 15.31884 | Stalled      | chr6:86597038-86621153    | 22.116  |
| <b>Them4</b>         | 87 | 0  | 1.450069 | 57   | 0.95     | 1.5187   | 47.7711  | Stalled      | chr3:94112053-94136454    | 22.402  |
| <b>4933439F18Rik</b> | 87 | 0  | 1.450069 | 207  | 3.45     | 4.20545  | 27.81382 | Stalled      | chr11:60228646-60258779   | 28.134  |
| <b>Vdac1</b>         | 87 | 0  | 1.450069 | 327  | 5.45     | 36.5613  | 28.0313  | Stalled      | chr11:52172616-52202898   | 28.283  |
| <b>Pagr3</b>         | 87 | 0  | 1.450069 | 647  | 10.78333 | 3.66262  | 2.386209 | Elongating   | chr5:97511347-97542615    | 29.269  |
| <b>Vps26a</b>        | 87 | 0  | 1.450069 | 156  | 2.6      | 10.9066  | 26.82959 | Stalled      | chr10:61917590-61951553   | 31.964  |
| <b>Anapc4</b>        | 87 | 0  | 1.450069 | 180  | 3        | 12.6555  | 30.91388 | Stalled      | chr5:53223373-53257973    | 32.601  |
| <b>Ugcg</b>          | 87 | 0  | 1.450069 | 666  | 11.1     | 9.28897  | 7.212614 | Stalled      | chr4:59200421-59235705    | 33.285  |
| <b>Aatk</b>          | 87 | 0  | 1.450069 | 92   | 1.533333 | 0.073111 | 0.294473 | Unclassified | chr11:119868631-119910029 | 39.399  |
| <b>Asb15</b>         | 87 | 0  | 1.450069 | 41   | 0.683333 | 0.117029 | 52.29496 | Stalled      | chr6:24476143-24523164    | 45.022  |
| <b>Acer2</b>         | 87 | 0  | 1.450069 | 102  | 1.7      | 0.694997 | 13.56649 | Stalled      | chr4:86518317-86566785    | 46.469  |
| <b>Spg11</b>         | 87 | 0  | 1.450069 | 1057 | 17.61667 | 3.55234  | 17.89013 | Stalled      | chr2:121879262-121946122  | 64.861  |
| <b>Polq</b>          | 87 | 0  | 1.450069 | 497  | 8.283333 | 4.60798  | 22.38183 | Stalled      | chr16:37009871-370995502  | 83.632  |
| <b>Inpp5f</b>        | 87 | 0  | 1.450069 | 499  | 8.316667 | 2.99543  | 16.29341 | Stalled      | chr7:135752878-135839950  | 85.073  |
| <b>Bmp2k</b>         | 87 | 0  | 1.450069 | 2594 | 43.23333 | 5.50779  | 8.423456 | Stalled      | chr5:97424707-97520067    | 93.361  |
| <b>Lims1</b>         | 87 | 0  | 1.450069 | 843  | 14.05    | 5.4866   | 17.51987 | Stalled      | chr10:57784294-57887437   | 101.144 |
| <b>Fancg</b>         | 87 | 0  | 1.450069 | 669  | 11.15    | 3.43885  | 47.8763  | Stalled      | chr13:63406016-63535053   | 127.038 |
| <b>Herc2</b>         | 87 | 0  | 1.450069 | 572  | 9.533333 | 5.50253  | 67.44381 | Stalled      | chr7:63303524-63487168    | 181.645 |
| <b>Rnu12</b>         | 86 | 17 | 1.433402 | 0    | 0        | 1.58743  | 431      | Unclassified | chr15:82978074-82980224   | 0.151   |
| <b>Nop10</b>         | 86 | 0  | 1.433402 | 0    | 0        | 40.1476  | 203      | Unclassified | chr2:112100125-112103055  | 0.931   |
| <b>Rps27</b>         | 86 | 0  | 1.433402 | 0    | 0        | 24.8228  | 361      | Unclassified | chr3:90016592-90019569    | 0.978   |
| <b>Tmub1</b>         | 86 | 0  | 1.433402 | 35   | 0.583333 | 5.69938  | 3.463927 | Stalled      | chr5:23951280-23955664    | 2.385   |
| <b>Tnfaip8l2</b>     | 86 | 0  | 1.433402 | 76   | 1.266667 | 20.5933  | 2.483331 | Stalled      | chr3:94943442-94948282    | 2.841   |
| <b>Rel2</b>          | 86 | 0  | 1.433402 | 30   | 0.5      | 1.98627  | 2.965119 | Stalled      | chr18:38113279-38118817   | 3.539   |
| <b>Aamp</b>          | 86 | 0  | 1.433402 | 83   | 1.383333 | 60.5004  | 6.865574 | Stalled      | chr1:74326420-74333240    | 4.821   |
| <b>Tifaf</b>         | 86 | 0  | 1.433402 | 22   | 0.366667 | 0.817329 | 3.355637 | Stalled      | chr13:56275063-56282246   | 5.184   |
| <b>Pdhh</b>          | 86 | 0  | 1.433402 | 336  | 5.6      | 17.5072  | 3.194551 | Stalled      | chr14:8998504-9007506     | 7.003   |
| <b>1110008F13Rik</b> | 86 | 0  | 1.433402 | 196  | 3.266667 | 49.1241  | 16.17445 | Stalled      | chr2:156686857-156699296  | 10.44   |
| <b>1110049F12Rik</b> | 86 | 0  | 1.433402 | 208  | 3.466667 | 24.4693  | 17.81757 | Stalled      | chr4:135531516-135545159  | 11.644  |
| <b>Flii</b>          | 86 | 0  | 1.433402 | 298  | 4.966667 | 22.413   | 6.931158 | Stalled      | chr11:60527650-60542723   | 13.074  |
| <b>Ttc16</b>         | 86 | 0  | 1.433402 | 91   | 1.516667 | 0.038405 | 7.687996 | Stalled      | chr2:32617697-32632903    | 13.207  |
| <b>Zfp873</b>        | 86 | 0  | 1.433402 | 53   | 0.883333 | 1.36749  | 38.6426  | Stalled      | chr10:81508871-81524331   | 13.461  |
| <b>AA881470</b>      | 86 | 0  | 1.433402 | 161  | 2.683333 | 4.74258  | 17.48967 | Stalled      | chr5:141178976-141195288  | 14.313  |
| <b>Mkks</b>          | 86 | 0  | 1.433402 | 78   | 1.3      | 6.06754  | 65.70938 | Stalled      | chr2:136699518-136719142  | 17.625  |
| <b>Ccbl1</b>         | 86 | 0  | 1.433402 | 54   | 0.9      | 2.09091  | 23.14245 | Stalled      | chr2:30040650-30063219    | 20.57   |
| <b>Napg</b>          | 86 | 0  | 1.433402 | 163  | 2.716667 | 5.06715  | 17.34308 | Stalled      | chr18:63135569-63159104   | 21.536  |
| <b>Chordc1</b>       | 86 | 0  | 1.433402 | 195  | 3.25     | 18.7543  | 21.43326 | Stalled      | chr9:18094710-18118444    | 21.735  |
| <b>Relb</b>          | 86 | 0  | 1.433402 | 770  | 12.83333 | 24.2021  | 8.946454 | Stalled      | chr7:20191570-20216787    | 23.218  |
| <b>Rab1</b>          | 86 | 0  | 1.433402 | 474  | 7.9      | 17.7796  | 10.02845 | Stalled      | chr11:20099604-20126859   | 25.256  |
| <b>Sfrs11</b>        | 86 | 0  | 1.433402 | 785  | 13.08333 | 42.9592  | 8.443218 | Stalled      | chr3:157673456-157701603  | 26.148  |
| <b>Mapre1</b>        | 86 | 0  | 1.433402 | 454  | 7.566667 | 10.6258  | 13.05059 | Stalled      | chr2:153565022-153599050  | 32.029  |
| <b>Ercc8</b>         | 86 | 0  | 1.433402 | 270  | 4.5      | 5.21155  | 24.82489 | Stalled      | chr13:108946931-108985175 | 36.245  |
| <b>Arsk</b>          | 86 | 0  | 1.433402 | 41   | 0.683333 | 2.45312  | 63.30419 | Stalled      | chr13:76197869-76238108   | 38.24   |
| <b>B4galnt2</b>      | 86 | 0  | 1.433402 | 215  | 3.583333 | 0.414037 | 0.568918 | Unclassified | chr11:95724872-95778185   | 51.314  |
| <b>Map3k7</b>        | 86 | 0  | 1.433402 | 505  | 8.416667 | 6.44091  | 43.50828 | Stalled      | chr4:32049081-32110439    | 59.359  |
| <b>Ttc37</b>         | 86 | 0  | 1.433402 | 460  | 7.666667 | 3.22922  | 20.92587 | Stalled      | chr13:76234181-76325431   | 89.251  |
| <b>Sic20a2</b>       | 86 | 0  | 1.433402 | 1085 | 18.08333 | 5.79423  | 17.41643 | Stalled      | chr8:23585171-23680088    | 92.918  |
| <b>Sos2</b>          | 86 | 0  | 1.433402 | 425  | 7.083333 | 2.34514  | 16.17928 | Stalled      | chr12:70684747-70784839   | 98.093  |
| <b>Ndufaf2</b>       | 86 | 0  | 1.433402 | 360  | 6        | 21.3697  | 48.11025 | Stalled      | chr13:108842782-108950819 | 106.038 |
| <b>Cacng2</b>        | 86 | 0  | 1.433402 | 177  | 2.95     | 0.044393 | 0.413245 | Unclassified | chr15:77824052-77951710   | 125.659 |
| <b>Cdk19</b>         | 86 | 0  | 1.433402 | 825  | 13.75    | 5.61925  | 26.32598 | Stalled      | chr10:40067113-40203624   | 134.512 |
| <b>Arhgef10l</b>     | 86 | 0  | 1.433402 | 297  | 4.95     | 0.384456 | 1.344789 | Unclassified | chr4:140070399-140223820  | 151.422 |
| <b>2210009G21Rik</b> | 86 | 0  | 1.433402 | 654  | 10.9     | 4.19882  | 80.50016 | Stalled      | chr2:136714953-136895514  | 178.562 |
| <b>Rac3</b>          | 85 | 0  | 1.416735 | 12   | 0.2      | 1.17602  | 2.226172 | Stalled      | chr11:120580781-120585283 | 2.503   |
| <b>Cd3eap</b>        | 85 | 0  | 1.416735 | 74   | 1.233333 | 8.40906  | 2.510886 | Stalled      | chr7:19942214-19946768    | 2.555   |
| <b>1190007I07Rik</b> | 85 | 0  | 1.416735 | 13   | 0.216667 | 17.3773  | 26.90675 | Stalled      | chr10:82082596-82087973   | 3.378   |
| <b>Bcl7c</b>         | 85 | 0  | 1.416735 | 57   | 0.95     | 24.7545  | 11.05921 | Stalled      | chr7:134848491-134854280  | 3.79    |
| <b>Dem1</b>          | 85 | 0  | 1.416735 | 30   | 0.5      | 17.2094  | 31.20942 | Stalled      | chr4:120593806-120599610  | 3.805   |
| <b>AA388235</b>      | 85 | 0  | 1.416735 | 18   | 0.3      | 0.906951 | 10.58252 | Stalled      | chr17:34116436-34122303   | 3.868   |
| <b>Fibp</b>          | 85 | 0  | 1.416735 | 42   | 0.7      | 18.779   | 13.04706 | Stalled      | chr19:5458693-5464994     | 4.302   |
| <b>Ndufb7</b>        | 85 | 0  | 1.416735 | 191  | 3.183333 | 168.575  | 4.345903 | Stalled      | chr8:86088656-86095522    | 4.867   |
| <b>Zbtb6</b>         | 85 | 0  | 1.416735 | 45   | 0.75     | 1.22932  | 16.45311 | Stalled      | chr2:37281021-37288439    | 5.419   |

|                      |    |    |          |      |          |          |          |              |                           |         |
|----------------------|----|----|----------|------|----------|----------|----------|--------------|---------------------------|---------|
| <b>Thumpd1</b>       | 85 | 0  | 1.416735 | 107  | 1.783333 | 16.7763  | 8.829377 | Stalled      | chr7:126858607-126866279  | 5.673   |
| <b>Vps25</b>         | 85 | 0  | 1.416735 | 105  | 1.75     | 29.6532  | 12.8215  | Stalled      | chr11:101113056-101120860 | 5.805   |
| <b>Gmfj</b>          | 85 | 0  | 1.416735 | 196  | 3.266667 | 30.6891  | 2.665605 | Stalled      | chr7:29223955-29231914    | 5.96    |
| <b>Sirt7</b>         | 85 | 0  | 1.416735 | 224  | 3.733333 | 37.4328  | 5.959866 | Stalled      | chr11:120479685-120488316 | 6.632   |
| <b>Vamp1</b>         | 85 | 0  | 1.416735 | 97   | 1.616667 | 4.33521  | 11.37294 | Stalled      | chr6:125163598-125172324  | 6.27    |
| <b>Nol12</b>         | 85 | 0  | 1.416735 | 252  | 4.2      | 16.46    | 5.492784 | Stalled      | chr15:78763362-78772340   | 6.979   |
| <b>Amdhd2</b>        | 85 | 0  | 1.416735 | 68   | 1.133333 | 9.79207  | 27.45983 | Stalled      | chr17:24292799-24302700   | 7.902   |
| <b>Zfp687</b>        | 85 | 0  | 1.416735 | 417  | 6.95     | 6.79825  | 3.426864 | Stalled      | chr3:94810623-94821160    | 8.538   |
| <b>Eme1</b>          | 85 | 0  | 1.416735 | 573  | 9.55     | 7.84795  | 2.309828 | Elongating   | chr11:94506315-94517068   | 8.754   |
| <b>Gmn</b>           | 85 | 0  | 1.416735 | 220  | 3.666667 | 26.1001  | 16.27515 | Stalled      | chr13:24843713-24855806   | 10.094  |
| <b>Khsrp</b>         | 85 | 0  | 1.416735 | 507  | 8.45     | 32.3089  | 3.883205 | Stalled      | chr17:57160471-57172930   | 10.46   |
| <b>Rbm43</b>         | 85 | 0  | 1.416735 | 86   | 1.433333 | 8.53672  | 15.50503 | Stalled      | chr2:51779971-51792529    | 10.559  |
| <b>Tspo</b>          | 85 | 0  | 1.416735 | 114  | 1.9      | 40.6757  | 6.85596  | Stalled      | chr15:83392002-83404633   | 10.632  |
| <b>Pigz</b>          | 85 | 0  | 1.416735 | 166  | 2.766667 | 0.340197 | 0.252758 | Stalled      | chr16:31931936-31946132   | 12.197  |
| <b>Rnf6</b>          | 85 | 0  | 1.416735 | 165  | 2.75     | 9.73909  | 17.40378 | Stalled      | chr5:147020779-147035013  | 12.235  |
| <b>Ropn11</b>        | 85 | 0  | 1.416735 | 23   | 0.383333 | 3.60508  | 25.63838 | Stalled      | chr15:31370964-31385444   | 12.481  |
| <b>6330578E17Rik</b> | 85 | 0  | 1.416735 | 122  | 2.033333 | 13.2086  | 23.67011 | Stalled      | chr1:37473930-37488895    | 12.966  |
| <b>2310004I24Rik</b> | 85 | 0  | 1.416735 | 266  | 4.433333 | 6.17528  | 16.06127 | Stalled      | chr11:66851381-66868120   | 14.74   |
| <b>Sco1</b>          | 85 | 0  | 1.416735 | 496  | 8.266667 | 3.90643  | 8.7802   | Stalled      | chr11:66864171-66880942   | 14.772  |
| <b>Fam128b</b>       | 85 | 0  | 1.416735 | 54   | 0.9      | 24.8776  | 36.19892 | Stalled      | chr16:15848533-15865415   | 14.883  |
| <b>Fam173b</b>       | 85 | 0  | 1.416735 | 102  | 1.7      | 4.60491  | 54.13093 | Stalled      | chr15:31529870-31547290   | 15.421  |
| <b>Rrm1</b>          | 85 | 0  | 1.416735 | 548  | 9.133333 | 38.0719  | 10.31179 | Stalled      | chr7:109588208-109618285  | 28.078  |
| <b>Rab5a</b>         | 85 | 0  | 1.416735 | 262  | 4.366667 | 9.47073  | 31.67072 | Stalled      | chr17:53616558-53647003   | 28.446  |
| <b>Sympk</b>         | 85 | 0  | 1.416735 | 596  | 9.933333 | 31.5483  | 4.350234 | Stalled      | chr7:19607725-19639971    | 30.247  |
| <b>Uap1</b>          | 85 | 0  | 1.416735 | 278  | 4.633333 | 11.1531  | 21.3348  | Stalled      | chr1:172072133-172107077  | 32.945  |
| <b>Napepld</b>       | 85 | 0  | 1.416735 | 159  | 2.65     | 1.91012  | 71.28778 | Stalled      | chr5:21168720-21209163    | 38.444  |
| <b>Brwd2</b>         | 85 | 0  | 1.416735 | 373  | 6.216667 | 6.79665  | 19.89792 | Stalled      | chr7:136733376-136779251  | 43.876  |
| <b>Stau1</b>         | 85 | 0  | 1.416735 | 805  | 13.41667 | 12.4257  | 11.1741  | Stalled      | chr2:166773641-166823778  | 48.138  |
| <b>Usp8</b>          | 85 | 0  | 1.416735 | 324  | 5.4      | 12.3757  | 43.46912 | Stalled      | chr2:126531098-126585028  | 51.931  |
| <b>Crem</b>          | 85 | 0  | 1.416735 | 290  | 4.833333 | 4.14485  | 83.64403 | Stalled      | chr18:3266351-3339587     | 71.237  |
| <b>Zfml</b>          | 85 | 0  | 1.416735 | 360  | 6        | 5.94689  | 48.39487 | Stalled      | chr6:83862346-83936863    | 72.518  |
| <b>Trip4</b>         | 85 | 50 | 1.416735 | 1221 | 20.35    | 3.57299  | 10.19333 | Stalled      | chr9:65676733-65758601    | 79.869  |
| <b>Trak1</b>         | 85 | 0  | 1.416735 | 1984 | 33.06667 | 11.0814  | 1.176552 | Elongating   | chr9:121274075-121384036  | 107.962 |
| <b>Chd2</b>          | 85 | 68 | 1.416735 | 4497 | 74.95    | 11.3363  | 5.567353 | Stalled      | chr7:80571537-80688632    | 115.096 |
| <b>Clpb</b>          | 85 | 0  | 1.416735 | 620  | 10.33333 | 6.23516  | 14.8046  | Stalled      | chr7:108810281-108938682  | 126.402 |
| <b>Eufsec</b>        | 85 | 0  | 1.416735 | 1510 | 25.16667 | 11.4512  | 31.14236 | Stalled      | chr6:88207327-88398533    | 189.207 |
| <b>Cubn</b>          | 85 | 0  | 1.416735 | 251  | 4.183333 | 0.045267 | 0        | Unclassified | chr2:13197964-13415503    | 215.54  |
| <b>CommD5</b>        | 84 | 0  | 1.400067 | 8    | 0.133333 | 16.6786  | 10.62264 | Unclassified | chr15:76728370-76731727   | 1.358   |
| <b>Rpl28</b>         | 84 | 0  | 1.400067 | 104  | 1.733333 | 333.412  | 3.210816 | Unclassified | chr7:4742566-4746149      | 1.584   |
| <b>Mocs3</b>         | 84 | 0  | 1.400067 | 16   | 0.266667 | 10.4439  | 14.79942 | Unclassified | chr2:168054121-168057802  | 1.682   |
| <b>Gmppb</b>         | 84 | 0  | 1.400067 | 159  | 2.65     | 39.1833  | 2.492804 | Stalled      | chr9:107949620-107954267  | 2.648   |
| <b>Rpp38</b>         | 84 | 0  | 1.400067 | 98   | 1.633333 | 3.88348  | 8.544696 | Stalled      | chr2:3246221-3251900      | 3.68    |
| <b>Hint1</b>         | 84 | 0  | 1.400067 | 123  | 2.05     | 213.351  | 8.253213 | Stalled      | chr11:54677939-54683998   | 4.06    |
| <b>Bcl6b</b>         | 84 | 0  | 1.400067 | 19   | 0.316667 | 0.684903 | 2.53168  | Unclassified | chr11:70037629-70045223   | 5.595   |
| <b>Dhrs1</b>         | 84 | 0  | 1.400067 | 61   | 1.016667 | 14.3596  | 15.03852 | Stalled      | chr14:56357858-56366521   | 6.664   |
| <b>Mett11d1</b>      | 84 | 0  | 1.400067 | 59   | 0.983333 | 11.0608  | 10.38224 | Stalled      | chr14:52502516-52511543   | 7.028   |
| <b>Usmg5</b>         | 84 | 0  | 1.400067 | 94   | 1.566667 | 32.4606  | 21.7583  | Stalled      | chr19:47157960-47167115   | 7.156   |
| <b>BC027344</b>      | 84 | 0  | 1.400067 | 55   | 0.916667 | 3.40549  | 13.95028 | Stalled      | chr7:30628954-30640667    | 9.714   |
| <b>Mgat4b</b>        | 84 | 0  | 1.400067 | 54   | 0.9      | 2.84368  | 9.221284 | Stalled      | chr11:50036836-50048605   | 9.77    |
| <b>Zcchc9</b>        | 84 | 0  | 1.400067 | 182  | 3.033333 | 12.2076  | 22.11105 | Stalled      | chr13:91936137-91949301   | 11.165  |
| <b>Gm5081</b>        | 84 | 0  | 1.400067 | 126  | 2.1      | 9.70712  | 26.34809 | Stalled      | chr12:58329398-58343153   | 11.756  |
| <b>Mrpl14</b>        | 84 | 0  | 1.400067 | 88   | 1.466667 | 58.4716  | 20.20177 | Stalled      | chr17:45821320-45835444   | 12.125  |
| <b>Sec13</b>         | 84 | 0  | 1.400067 | 432  | 7.2      | 67.4623  | 4.457015 | Stalled      | chr6:113678045-113692675  | 12.631  |
| <b>Cct4</b>          | 84 | 0  | 1.400067 | 317  | 5.283333 | 72.8338  | 13.68336 | Stalled      | chr11:22888592-22903336   | 12.745  |
| <b>Camkv</b>         | 84 | 0  | 1.400067 | 31   | 0.516667 | 0.126735 | 1.459004 | Unclassified | chr9:107836250-107852022  | 13.773  |
| <b>Thap2</b>         | 84 | 0  | 1.400067 | 84   | 1.4      | 2.24213  | 43.53464 | Stalled      | chr10:114807021-114823491 | 14.471  |
| <b>Taf9</b>          | 84 | 0  | 1.400067 | 174  | 2.9      | 35.6495  | 24.39211 | Stalled      | chr13:101419297-101436368 | 15.072  |
| <b>PsmD13</b>        | 84 | 0  | 1.400067 | 232  | 3.866667 | 50.3452  | 10.17695 | Stalled      | chr7:148066292-148084541  | 16.25   |
| <b>Sirt3</b>         | 84 | 0  | 1.400067 | 189  | 3.15     | 9.28646  | 16.31164 | Stalled      | chr7:148049561-148070208  | 18.648  |
| <b>Mpz13</b>         | 84 | 0  | 1.400067 | 72   | 1.2      | 4.95961  | 28.45446 | Stalled      | chr9:44861270-44882971    | 19.702  |
| <b>Rabepk</b>        | 84 | 31 | 1.400067 | 716  | 11.93333 | 9.95083  | 4.730123 | Stalled      | chr2:34634185-34657311    | 21.127  |
| <b>Dpm1</b>          | 84 | 0  | 1.400067 | 320  | 5.333333 | 10.9703  | 20.79106 | Stalled      | chr2:168034547-168057879  | 21.333  |
| <b>Rap2a</b>         | 84 | 32 | 1.400067 | 66   | 1.1      | 2.40553  | 47.33957 | Stalled      | chr14:120875682-120906414 | 28.733  |
| <b>N4bp212</b>       | 84 | 0  | 1.400067 | 339  | 5.65     | 3.09302  | 14.25658 | Stalled      | chr5:151438547-151470187  | 29.641  |
| <b>Rad17</b>         | 84 | 0  | 1.400067 | 194  | 3.233333 | 5.97275  | 44.94581 | Stalled      | chr13:101387118-101423014 | 33.897  |
| <b>Ubqln1</b>        | 84 | 0  | 1.400067 | 542  | 9.033333 | 44.1246  | 21.85021 | Stalled      | chr13:58277522-58318953   | 39.432  |
| <b>Nvl</b>           | 84 | 0  | 1.400067 | 647  | 10.78333 | 10.2119  | 15.27624 | Stalled      | chr1:183023553-183076288  | 50.736  |
| <b>Smyd4</b>         | 84 | 0  | 1.400067 | 187  | 3.116667 | 3.52345  | 69.16451 | Stalled      | chr11:75159934-75219207   | 57.274  |
| <b>Wwp2</b>          | 84 | 0  | 1.400067 | 1316 | 21.93333 | 8.45016  | 18.5526  | Stalled      | chr8:109958297-110082495  | 122.199 |
| <b>Tcf712</b>        | 84 | 0  | 1.400067 | 666  | 11.1     | 1.62251  | 8.909232 | Stalled      | chr19:55814299-56008144   | 191.846 |
| <b>Alkbh7</b>        | 83 | 0  | 1.3834   | 12   | 0.2      | 20.5268  | 12.65122 | Unclassified | chr17:57134775-57138745   | 1.971   |
| <b>Polr2d</b>        | 83 | 0  | 1.3834   | 67   | 1.116667 | 23.844   | 23.04601 | Stalled      | chr18:31946812-31956355   | 7.544   |
| <b>Smarcd2</b>       | 83 | 0  | 1.3834   | 407  | 6.783333 | 51.8491  | 5.970246 | Stalled      | chr11:106124484-106136286 | 9.803   |
| <b>Slc5a5</b>        | 83 | 0  | 1.3834   | 38   | 0.633333 | 0.140069 | 13.05803 | Stalled      | chr8:73406787-73418656    | 9.87    |
| <b>Topors</b>        | 83 | 0  | 1.3834   | 317  | 5.283333 | 9.37846  | 13.05265 | Stalled      | chr4:40206638-40218874    | 10.237  |
| <b>Krt222</b>        | 83 | 0  | 1.3834   | 66   | 1.1      | 2.78877  | 6.824867 | Stalled      | chr11:99094411-99107381   | 10.971  |
| <b>Wdr85</b>         | 83 | 0  | 1.3834   | 239  | 3.983333 | 7.35851  | 9.726084 | Stalled      | chr2:24815941-24828991    | 11.051  |
| <b>Trim45</b>        | 83 | 0  | 1.3834   | 51   | 0.85     | 1.96973  | 16.24384 | Stalled      | chr3:100724415-100737933  | 11.519  |
| <b>2610110G12Rik</b> | 83 | 0  | 1.3834   | 183  | 3.05     | 8.61892  | 13.51104 | Stalled      | chr17:36034540-36049013   | 12.474  |
| <b>Alg12</b>         | 83 | 0  | 1.3834   | 159  | 2.65     | 4.64732  | 29.484   | Stalled      | chr15:88635673-88651748   | 14.076  |
| <b>2310037I24Rik</b> | 83 | 0  | 1.3834   | 373  | 6.216667 | 20.1671  | 18.23973 | Stalled      | chr15:98349531-98366652   | 15.122  |
| <b>Gtf3c5</b>        | 83 | 0  | 1.3834   | 267  | 4.45     | 10.9161  | 7.923595 | Stalled      | chr2:28421782-28440799    | 17.018  |
| <b>BC089883</b>      | 83 | 0  | 1.3834   | 96   | 1.6      | 4.067    | 8.702892 | Stalled      | chr8:59010318-59031363    | 19.046  |
| <b>Ccdc126</b>       | 83 | 0  | 1.3834   | 77   | 1.283333 | 1.21883  | 17.29003 | Stalled      | chr6:49267351-49291580    | 22.23   |
| <b>Rpap1</b>         | 83 | 0  | 1.3834   | 238  | 3.966667 | 11.734   | 19.58275 | Stalled      | chr2:119589695-119615273  | 23.579  |
| <b>Mrpl3</b>         | 83 | 0  | 1.3834   | 456  | 7.6      | 20.5569  | 4.794954 | Stalled      | chr9:104953597-104979806  | 24.21   |

|                      |    |   |          |      |          |          |          |              |                           |         |
|----------------------|----|---|----------|------|----------|----------|----------|--------------|---------------------------|---------|
| <b>Bbs2</b>          | 83 | 0 | 1.3834   | 71   | 1.183333 | 2.67411  | 49.14379 | Stalled      | chr8:96591853-96624711    | 30.859  |
| <b>Dhx9</b>          | 83 | 0 | 1.3834   | 1039 | 17.31667 | 59.614   | 13.28702 | Stalled      | chr1:155302887-155336790  | 31.904  |
| <b>Mgea5</b>         | 83 | 0 | 1.3834   | 817  | 13.61667 | 18.729   | 13.01683 | Stalled      | chr19:45824748-45859781   | 33.034  |
| <b>Carm1</b>         | 83 | 0 | 1.3834   | 917  | 15.28333 | 36.1487  | 4.857404 | Stalled      | chr9:21349337-21393909    | 42.573  |
| <b>Esco1</b>         | 83 | 0 | 1.3834   | 211  | 3.516667 | 3.46988  | 60.92751 | Stalled      | chr18:10566509-10612350   | 43.842  |
| <b>Lsm14a</b>        | 83 | 0 | 1.3834   | 658  | 10.96667 | 31.7088  | 31.03285 | Stalled      | chr7:35129738-35176559    | 44.822  |
| <b>Pacs2</b>         | 83 | 0 | 1.3834   | 427  | 7.116667 | 4.38682  | 15.636   | Stalled      | chr12:114250718-114312612 | 59.895  |
| <b>Cd247</b>         | 83 | 0 | 1.3834   | 466  | 7.766667 | 3.29283  | 0.765938 | Stalled      | chr1:167716819-167804117  | 85.299  |
| <b>Calcr1</b>        | 83 | 0 | 1.3834   | 123  | 2.05     | 0.910311 | 45.38332 | Stalled      | chr2:84170790-84267423    | 94.634  |
| <b>Nars2</b>         | 83 | 0 | 1.3834   | 269  | 4.483333 | 4.33061  | 85.96273 | Stalled      | chr7:104098036-104213267  | 113.232 |
| <b>Spag9</b>         | 83 | 0 | 1.3834   | 770  | 12.83333 | 6.38903  | 31.9974  | Stalled      | chr11:93855404-93987396   | 129.993 |
| <b>Gnal</b>          | 83 | 0 | 1.3834   | 415  | 6.916667 | 0.405333 | 0.497621 | Unclassified | chr18:67245989-67386445   | 138.457 |
| <b>Pgp</b>           | 82 | 0 | 1.366732 | 3    | 0.05     | 60.4098  | 14.52    | Unclassified | chr17:24605417-24608541   | 1.125   |
| <b>Clpp</b>          | 82 | 0 | 1.366732 | 105  | 1.75     | 33.9671  | 10.85342 | Stalled      | chr17:57127686-57135792   | 6.107   |
| <b>Sap30l</b>        | 82 | 0 | 1.366732 | 43   | 0.716667 | 10.5642  | 27.70616 | Stalled      | chr11:57613138-57624117   | 8.98    |
| <b>Acaa1a</b>        | 82 | 0 | 1.366732 | 87   | 1.45     | 19.5086  | 11.45656 | Stalled      | chr9:119248411-119259413  | 9.003   |
| <b>Dullard</b>       | 82 | 0 | 1.366732 | 172  | 2.866667 | 41.2187  | 13.46194 | Stalled      | chr11:69792669-69804102   | 9.434   |
| <b>Syng4</b>         | 82 | 0 | 1.366732 | 49   | 0.816667 | 0.611567 | 34.17371 | Stalled      | chr7:53142214-53154081    | 9.868   |
| <b>Nubp1</b>         | 82 | 0 | 1.366732 | 810  | 13.5     | 43.5726  | 6.83484  | Stalled      | chr16:10410030-10424511   | 12.482  |
| <b>Mcart1</b>        | 82 | 0 | 1.366732 | 163  | 2.716667 | 4.51602  | 14.69388 | Stalled      | chr4:45408795-45423633    | 12.839  |
| <b>1110054O05Rik</b> | 82 | 0 | 1.366732 | 485  | 8.083333 | 9.41341  | 7.795387 | Stalled      | chr4:59782518-59798727    | 14.21   |
| <b>Ppp1cc</b>        | 82 | 0 | 1.366732 | 898  | 14.96667 | 30.9809  | 4.811639 | Stalled      | chr5:122606287-122625278  | 16.992  |
| <b>Nsfl1c</b>        | 82 | 0 | 1.366732 | 235  | 3.916667 | 34.2049  | 11.28155 | Stalled      | chr2:151318043-151337040  | 16.998  |
| <b>Cisd2</b>         | 82 | 0 | 1.366732 | 246  | 4.1      | 11.1923  | 30.87951 | Stalled      | chr3:135069376-135088397  | 17.022  |
| <b>9430015G10Rik</b> | 82 | 0 | 1.366732 | 121  | 2.016667 | 8.01475  | 36.37748 | Stalled      | chr4:155482106-155501370  | 17.265  |
| <b>Trim69</b>        | 82 | 0 | 1.366732 | 126  | 2.1      | 0.072903 | 0.967229 | Stalled      | chr2:121984435-122004763  | 18.329  |
| <b>Wbp7</b>          | 82 | 0 | 1.366732 | 769  | 12.81667 | 19.5242  | 6.395816 | Stalled      | chr7:31353873-31375745    | 19.873  |
| <b>Mina</b>          | 82 | 0 | 1.366732 | 418  | 6.966667 | 23.9795  | 10.56457 | Stalled      | chr16:59469600-59492275   | 20.676  |
| <b>2810002N01Rik</b> | 82 | 0 | 1.366732 | 278  | 4.633333 | 20.2747  | 21.29947 | Stalled      | chr12:112949479-112972435 | 20.957  |
| <b>Wdr5</b>          | 82 | 0 | 1.366732 | 454  | 7.566667 | 14.1963  | 9.412068 | Stalled      | chr2:27368666-27392053    | 21.388  |
| <b>Morn5</b>         | 82 | 0 | 1.366732 | 52   | 0.866667 | 0.854422 | 45.34809 | Stalled      | chr2:35902992-35935229    | 30.238  |
| <b>Fam82b</b>        | 82 | 0 | 1.366732 | 100  | 1.666667 | 3.16533  | 37.97433 | Stalled      | chr4:19500213-19534079    | 31.867  |
| <b>Flh2</b>          | 82 | 0 | 1.366732 | 51   | 0.85     | 0.45099  | 1.755504 | Unclassified | chr1:43179918-43222806    | 40.889  |
| <b>2010106G01Rik</b> | 82 | 0 | 1.366732 | 348  | 5.8      | 6.43229  | 30.15541 | Stalled      | chr2:126716137-126760971  | 42.835  |
| <b>Ppp2r5a</b>       | 82 | 0 | 1.366732 | 562  | 9.366667 | 20.7047  | 28.13573 | Stalled      | chr1:193175859-19322920   | 45.062  |
| <b>Sesn3</b>         | 82 | 0 | 1.366732 | 265  | 4.416667 | 8.74631  | 35.32284 | Stalled      | chr9:14078744-14130578    | 49.835  |
| <b>Rnmt1</b>         | 81 | 0 | 1.350065 | 114  | 1.9      | 18.9613  | 12.76925 | Stalled      | chr11:76055237-76064124   | 6.888   |
| <b>Hmga1</b>         | 81 | 0 | 1.350065 | 700  | 11.66667 | 62.1066  | 6.012746 | Stalled      | chr17:27691518-27700617   | 7.1     |
| <b>Zfp770</b>        | 81 | 0 | 1.350065 | 42   | 0.7      | 1.95759  | 22.91828 | Stalled      | chr2:114019198-114029168  | 7.971   |
| <b>Fkbp7</b>         | 81 | 0 | 1.350065 | 36   | 0.6      | 6.36455  | 21.72653 | Stalled      | chr2:76501090-76513155    | 10.066  |
| <b>Snrpd1</b>        | 81 | 0 | 1.350065 | 250  | 4.166667 | 62.6631  | 7.056014 | Stalled      | chr18:10615793-10628228   | 10.436  |
| <b>Zfp709</b>        | 81 | 0 | 1.350065 | 45   | 0.75     | 0.857306 | 22.65858 | Stalled      | chr8:74403966-74416464    | 10.499  |
| <b>Timm17a</b>       | 81 | 0 | 1.350065 | 179  | 2.983333 | 26.6496  | 19.85104 | Stalled      | chr1:137198111-137212314  | 12.204  |
| <b>Zdhhc8</b>        | 81 | 0 | 1.350065 | 146  | 2.433333 | 6.17567  | 8.145967 | Stalled      | chr16:18220845-18237229   | 14.385  |
| <b>Ttc4</b>          | 81 | 0 | 1.350065 | 254  | 4.233333 | 11.2329  | 9.853428 | Stalled      | chr4:106334860-106353487  | 16.628  |
| <b>Epn1</b>          | 81 | 0 | 1.350065 | 578  | 9.633333 | 66.5177  | 13.55801 | Stalled      | chr7:5029906-5049778      | 17.873  |
| <b>AB124611</b>      | 81 | 0 | 1.350065 | 161  | 2.683333 | 31.4038  | 11.48123 | Stalled      | chr9:21328720-21349237    | 18.518  |
| <b>Gorab</b>         | 81 | 0 | 1.350065 | 98   | 1.633333 | 1.80275  | 18.84737 | Stalled      | chr1:165315039-165335772  | 18.734  |
| <b>Nos3</b>          | 81 | 0 | 1.350065 | 84   | 1.4      | 1.20913  | 0.363482 | Unclassified | chr5:23868636-23890292    | 19.657  |
| <b>Wdr12</b>         | 81 | 0 | 1.350065 | 225  | 3.75     | 8.28576  | 20.33773 | Stalled      | chr1:60133711-60156722    | 21.012  |
| <b>Glod4</b>         | 81 | 0 | 1.350065 | 107  | 1.783333 | 9.50059  | 44.85144 | Stalled      | chr11:76033896-76059201   | 23.306  |
| <b>Saal1</b>         | 81 | 0 | 1.350065 | 321  | 5.35     | 4.08725  | 13.59896 | Stalled      | chr7:53941477-53968021    | 24.545  |
| <b>Rad54l</b>        | 81 | 0 | 1.350065 | 322  | 5.366667 | 13.6923  | 17.54041 | Stalled      | chr4:115769559-115798294  | 26.736  |
| <b>Cr1l</b>          | 81 | 0 | 1.350065 | 157  | 2.616667 | 17.7301  | 35.55966 | Stalled      | chr1:196929981-196959764  | 27.784  |
| <b>Yars</b>          | 81 | 0 | 1.350065 | 1034 | 17.23333 | 30.9743  | 8.29598  | Stalled      | chr4:128865038-128896851  | 29.814  |
| <b>Psqh1</b>         | 81 | 0 | 1.350065 | 328  | 5.466667 | 4.6699   | 12.35783 | Stalled      | chr8:108422373-108455702  | 31.33   |
| <b>Wipi1</b>         | 81 | 0 | 1.350065 | 112  | 1.866667 | 2.27121  | 8.668301 | Stalled      | chr11:109434834-109474703 | 37.87   |
| <b>S100pbp</b>       | 81 | 0 | 1.350065 | 226  | 3.766667 | 6.82082  | 38.1362  | Stalled      | chr4:128828068-128868726  | 38.659  |
| <b>Ctnnbip1</b>      | 81 | 0 | 1.350065 | 137  | 2.283333 | 1.43097  | 6.405878 | Stalled      | chr4:148890349-148940546  | 48.198  |
| <b>Carf</b>          | 81 | 0 | 1.350065 | 77   | 1.283333 | 0.339466 | 90.84408 | Stalled      | chr1:60153124-60207878    | 52.755  |
| <b>Cep70</b>         | 81 | 0 | 1.350065 | 92   | 1.533333 | 0.591232 | 32.51777 | Stalled      | chr9:99141886-99200822    | 56.937  |
| <b>Trpc4ap</b>       | 81 | 0 | 1.350065 | 577  | 9.616667 | 23.7526  | 11.25755 | Stalled      | chr2:155460013-155520120  | 58.108  |
| <b>Ints4</b>         | 81 | 0 | 1.350065 | 426  | 7.1      | 14.4421  | 18.85746 | Stalled      | chr7:104627465-104689907  | 60.443  |
| <b>Mbtd1</b>         | 81 | 0 | 1.350065 | 348  | 5.8      | 2.55008  | 26.82258 | Stalled      | chr11:93745532-93808298   | 60.767  |
| <b>Arrhgef17</b>     | 81 | 0 | 1.350065 | 135  | 2.25     | 0.217495 | 3.439555 | Unclassified | chr7:108018259-108082675  | 62.417  |
| <b>Foxo1</b>         | 81 | 0 | 1.350065 | 2107 | 35.11667 | 11.8159  | 9.267079 | Stalled      | chr3:52070258-52154031    | 81.774  |
| <b>Garni3</b>        | 81 | 0 | 1.350065 | 148  | 2.466667 | 0.026488 | 4.02841  | Unclassified | chr2:32841885-32944724    | 100.84  |
| <b>Pde3b</b>         | 81 | 0 | 1.350065 | 390  | 6.5      | 10.0798  | 22.35436 | Stalled      | chr7:121556767-121681451  | 122.685 |
| <b>Skap2</b>         | 81 | 0 | 1.350065 | 367  | 6.116667 | 16.1875  | 36.38116 | Stalled      | chr6:51809163-51964548    | 153.386 |
| <b>Hcfc1r1</b>       | 80 | 0 | 1.333397 | 7    | 0.116667 | 11.1989  | 26.8977  | Unclassified | chr17:23808574-23812491   | 1.918   |
| <b>Cbr1</b>          | 80 | 0 | 1.333397 | 3    | 0.05     | 16.7596  | 19.45326 | Stalled      | chr16:93606081-93610594   | 2.514   |
| <b>Hras1</b>         | 80 | 0 | 1.333397 | 66   | 1.1      | 16.863   | 6.226546 | Stalled      | chr7:148375832-148381903  | 4.072   |
| <b>Cdipt</b>         | 80 | 0 | 1.333397 | 66   | 1.1      | 36.0028  | 5.016919 | Stalled      | chr7:134117862-134124015  | 4.154   |
| <b>Thoc6</b>         | 80 | 0 | 1.333397 | 42   | 0.7      | 21.6793  | 21.41603 | Stalled      | chr17:23805585-23812737   | 5.153   |
| <b>Tsen34</b>        | 80 | 0 | 1.333397 | 51   | 0.85     | 15.7171  | 15.94274 | Stalled      | chr7:3644109-3652637      | 6.529   |
| <b>Prhoxnb</b>       | 80 | 0 | 1.333397 | 10   | 0.166667 | 0.486484 | 1.569276 | Unclassified | chr5:148126561-148136016  | 7.456   |
| <b>Cdca4</b>         | 80 | 0 | 1.333397 | 499  | 8.316667 | 28.4682  | 8.346473 | Stalled      | chr12:114058445-114069600 | 9.156   |
| <b>Clec2i</b>        | 80 | 0 | 1.333397 | 308  | 5.133333 | 5.77761  | 2.03142  | Elongating   | chr6:128835631-128846866  | 9.236   |
| <b>Ssbp1</b>         | 80 | 0 | 1.333397 | 109  | 1.816667 | 15.3897  | 24.39718 | Stalled      | chr6:40419413-40431822    | 10.41   |
| <b>P2ry14</b>        | 80 | 0 | 1.333397 | 63   | 1.05     | 0.766314 | 0.576954 | Unclassified | chr3:58918546-58936546    | 16.001  |
| <b>Tafr</b>          | 80 | 0 | 1.333397 | 72   | 1.2      | 0.176048 | 3.419312 | Stalled      | chr4:132117981-132136781  | 16.801  |
| <b>Zc3h8</b>         | 80 | 0 | 1.333397 | 117  | 1.95     | 3.83431  | 34.32119 | Stalled      | chr2:128752003-128771756  | 17.754  |
| <b>Ms4a6d</b>        | 80 | 0 | 1.333397 | 17   | 0.283333 | 0.304245 | 1.005848 | Unclassified | chr19:11661095-11681294   | 18.2    |
| <b>BC021785</b>      | 80 | 0 | 1.333397 | 48   | 0.8      | 1.62288  | 1.094911 | Unclassified | chr10:39677866-39708452   | 28.587  |
| <b>Mybl2</b>         | 80 | 0 | 1.333397 | 1069 | 17.81667 | 24.0096  | 7.170534 | Stalled      | chr2:162878370-162910423  | 30.054  |
| <b>Ctse</b>          | 80 | 0 | 1.333397 | 224  | 3.733333 | 7.52489  | 7.929111 | Stalled      | chr1:133532890-133572084  | 37.195  |



|                      |    |    |          |      |          |          |          |              |                           |         |
|----------------------|----|----|----------|------|----------|----------|----------|--------------|---------------------------|---------|
| <b>Sp3</b>           | 80 | 0  | 1.333397 | 1000 | 16.66667 | 7.87202  | 26.47673 | Stalled      | chr2:72774489-72820503    | 44.015  |
| <b>Prmt3</b>         | 80 | 0  | 1.333397 | 898  | 14.96667 | 7.06724  | 23.34373 | Stalled      | chr7:57031727-57113635    | 79.909  |
| <b>Ints6</b>         | 80 | 0  | 1.333397 | 699  | 11.65    | 6.18942  | 79.63452 | Stalled      | chr14:63295164-63381949   | 84.786  |
| <b>Atg10d</b>        | 80 | 0  | 1.333397 | 362  | 6.033333 | 2.39393  | 31.86454 | Stalled      | chr5:72592567-72690010    | 95.444  |
| <b>Sgk3</b>          | 80 | 0  | 1.333397 | 1000 | 16.66667 | 2.73354  | 14.34271 | Stalled      | chr1:9786210-9892649      | 104.44  |
| <b>Mdn1</b>          | 80 | 0  | 1.333397 | 1382 | 23.03333 | 7.47648  | 15.70082 | Stalled      | chr4:32742093-32862192    | 118.1   |
| <b>Mbnl1</b>         | 80 | 0  | 1.333397 | 2026 | 33.76667 | 12.6128  | 11.48578 | Stalled      | chr3:60303173-60433670    | 128.498 |
| <b>Exosc6</b>        | 79 | 0  | 1.31673  | 9    | 0.15     | 0        | 11.03217 | Unclassified | chr8:113578238-113581499  | 1.262   |
| <b>1700067K01Rik</b> | 79 | 0  | 1.31673  | 55   | 0.916667 | 1.95082  | 1.37574  | Elongating   | chr8:86523604-86528669    | 3.066   |
| <b>Clec4g</b>        | 79 | 0  | 1.31673  | 13   | 0.216667 | 0.228492 | 0.21597  | Unclassified | chr8:3716071-3722651      | 4.581   |
| <b>Stk16</b>         | 79 | 0  | 1.31673  | 220  | 3.666667 | 10.9291  | 3.326778 | Stalled      | chr1:75205403-75212181    | 4.779   |
| <b>Coq7</b>          | 79 | 0  | 1.31673  | 69   | 1.15     | 14.2567  | 23.01845 | Stalled      | chr7:125668575-125678827  | 8.253   |
| <b>Ap2m1</b>         | 79 | 0  | 1.31673  | 137  | 2.283333 | 35.5796  | 8.619207 | Stalled      | chr16:20533576-20544126   | 8.551   |
| <b>Zfp90</b>         | 79 | 0  | 1.31673  | 42   | 0.7      | 3.39791  | 12.22905 | Stalled      | chr8:108937238-108949789  | 10.552  |
| <b>Ppid</b>          | 79 | 0  | 1.31673  | 209  | 3.483333 | 22.5704  | 16.82319 | Stalled      | chr3:79393310-79407572    | 12.263  |
| <b>Tmem70</b>        | 79 | 0  | 1.31673  | 174  | 2.9      | 12.7109  | 14.22371 | Stalled      | chr1:16653271-16668356    | 13.086  |
| <b>Calcoco1</b>      | 79 | 0  | 1.31673  | 57   | 0.95     | 6.63649  | 5.613196 | Stalled      | chr15:102537209-102554500 | 15.292  |
| <b>Zfp809</b>        | 79 | 0  | 1.31673  | 227  | 3.783333 | 10.0573  | 25.21729 | Stalled      | chr9:22028146-22047796    | 17.651  |
| <b>Nat15</b>         | 79 | 0  | 1.31673  | 427  | 7.116667 | 12.0111  | 7.946271 | Stalled      | chr16:3882618-3904781     | 20.164  |
| <b>Ugdh</b>          | 79 | 0  | 1.31673  | 89   | 1.483333 | 7.5482   | 40.65535 | Stalled      | chr5:65804460-65829081    | 22.622  |
| <b>Hps1</b>          | 79 | 0  | 1.31673  | 307  | 5.116667 | 7.85896  | 15.24201 | Stalled      | chr19:42829685-42856466   | 24.782  |
| <b>Mogat1</b>        | 79 | 0  | 1.31673  | 99   | 1.65     | 0.531357 | 0.208728 | Unclassified | chr1:78505634-78534748    | 27.115  |
| <b>Styx11</b>        | 79 | 0  | 1.31673  | 87   | 1.45     | 0.505732 | 93.26968 | Stalled      | chr5:136223518-136256161  | 30.644  |
| <b>Ccdc77</b>        | 79 | 0  | 1.31673  | 138  | 2.3      | 4.11202  | 19.78253 | Stalled      | chr6:120274715-120309378  | 32.664  |
| <b>D16Erttd472e</b>  | 79 | 0  | 1.31673  | 1341 | 22.35    | 7.54225  | 10.26845 | Stalled      | chr16:78540582-78578913   | 36.332  |
| <b>Zmyem6</b>        | 79 | 0  | 1.31673  | 79   | 1.316667 | 2.4304   | 74.9822  | Stalled      | chr4:126752626-126801538  | 46.913  |
| <b>Gfpt1</b>         | 79 | 0  | 1.31673  | 364  | 6.066667 | 9.12216  | 53.71543 | Stalled      | chr6:86990839-87042201    | 49.363  |
| <b>Ugp2</b>          | 79 | 0  | 1.31673  | 350  | 5.833333 | 6.17183  | 29.82374 | Stalled      | chr11:21221146-21272882   | 49.737  |
| <b>Spnb4</b>         | 79 | 0  | 1.31673  | 326  | 5.433333 | 1.01351  | 0.644554 | Unclassified | chr7:28141401-28233608    | 90.208  |
| <b>9130011E15Rik</b> | 79 | 0  | 1.31673  | 626  | 10.43333 | 2.41609  | 37.41265 | Stalled      | chr19:45892633-46074978   | 180.346 |
| <b>Hist1h4f</b>      | 78 | 27 | 1.300062 | 0    | 0        | 0        | 334      | Unclassified | chr13:23643200-23645512   | 0.313   |
| <b>Cyb5d1</b>        | 78 | 0  | 1.300062 | 1    | 0.016667 | 10.855   | 45.78802 | Unclassified | chr11:69207113-69210848   | 1.736   |
| <b>E2f1</b>          | 78 | 0  | 1.300062 | 409  | 6.816667 | 15.2929  | 6.037349 | Stalled      | chr2:154385374-154397588  | 10.215  |
| <b>Sepp1</b>         | 78 | 0  | 1.300062 | 36   | 0.6      | 0.959829 | 1.885949 | Unclassified | chr4:134093806-134110081  | 14.276  |
| <b>Pcmt2</b>         | 78 | 0  | 1.300062 | 54   | 0.9      | 4.31614  | 25.31187 | Stalled      | chr2:181570607-181592155  | 19.549  |
| <b>Cenpk</b>         | 78 | 0  | 1.300062 | 74   | 1.233333 | 3.06325  | 56.26443 | Stalled      | chr13:105017034-105039697 | 20.664  |
| <b>Ppwd1</b>         | 78 | 0  | 1.300062 | 154  | 2.566667 | 8.76857  | 34.4607  | Stalled      | chr13:104995201-105020924 | 23.724  |
| <b>2310001A20Rik</b> | 78 | 0  | 1.300062 | 199  | 3.316667 | 11.1055  | 17.50345 | Stalled      | chr2:150408816-150436259  | 25.444  |
| <b>Tmem68</b>        | 78 | 0  | 1.300062 | 147  | 2.45     | 2.62176  | 40.89604 | Stalled      | chr4:3476187-3503915      | 25.729  |
| <b>Accn2</b>         | 78 | 0  | 1.300062 | 96   | 1.6      | 0.463077 | 0.469046 | Unclassified | chr15:99499148-99531559   | 30.412  |
| <b>Tex9</b>          | 78 | 0  | 1.300062 | 184  | 3.066667 | 3.85606  | 20.38041 | Stalled      | chr9:72308912-72341763    | 30.852  |
| <b>Gabbr2</b>        | 78 | 0  | 1.300062 | 95   | 1.583333 | 0.017597 | 0.250523 | Unclassified | chr4:33148086-33182840    | 32.755  |
| <b>Zbed4</b>         | 78 | 0  | 1.300062 | 228  | 3.8      | 1.44828  | 31.7082  | Stalled      | chr15:88580140-88614946   | 32.807  |
| <b>Gxyt1</b>         | 78 | 0  | 1.300062 | 334  | 5.566667 | 4.68775  | 23.77593 | Stalled      | chr15:93070172-93107515   | 35.344  |
| <b>Xpot</b>          | 78 | 0  | 1.300062 | 630  | 10.5     | 8.14122  | 16.13083 | Stalled      | chr10:121024435-121065372 | 38.938  |
| <b>Tgs1</b>          | 78 | 0  | 1.300062 | 357  | 5.95     | 5.93807  | 29.2972  | Stalled      | chr4:3500025-3543768      | 41.744  |
| <b>Rsbn1</b>         | 78 | 0  | 1.300062 | 563  | 9.383333 | 13.2675  | 22.12609 | Stalled      | chr3:103716042-103770543  | 52.502  |
| <b>Kif7</b>          | 78 | 0  | 1.300062 | 1117 | 18.61667 | 13.2254  | 20.02126 | Stalled      | chr1:64082246-64169963    | 85.718  |
| <b>Tox2</b>          | 78 | 0  | 1.300062 | 188  | 3.133333 | 0.367274 | 0.67908  | Unclassified | chr2:163049189-163148838  | 97.65   |
| <b>Ric8b</b>         | 78 | 0  | 1.300062 | 451  | 7.516667 | 2.99151  | 21.03426 | Stalled      | chr10:84378360-84479192   | 98.833  |
| <b>Kdm4c</b>         | 78 | 0  | 1.300062 | 493  | 8.216667 | 3.99853  | 69.83879 | Stalled      | chr4:73895851-74051765    | 153.915 |
| <b>Rttm</b>          | 78 | 0  | 1.300062 | 351  | 5.85     | 2.68092  | 39.15055 | Stalled      | chr18:89139181-89300406   | 159.226 |
| <b>Snord35a</b>      | 77 | 0  | 1.283395 | 0    | 0        | 0        | 254      | Unclassified | chr7:52381716-52383805    | 0.09    |
| <b>Hist1h2ak</b>     | 77 | 54 | 1.283395 | 0    | 0        | 0        | 488      | Unclassified | chr13:21845303-21847696   | 0.394   |
| <b>Zfand2b</b>       | 77 | 0  | 1.283395 | 74   | 1.233333 | 14.6292  | 5.188389 | Stalled      | chr1:75163219-75168199    | 2.981   |
| <b>Tmed9</b>         | 77 | 0  | 1.283395 | 152  | 2.533333 | 128.602  | 7.302338 | Stalled      | chr13:55692495-55699055   | 4.561   |
| <b>Mpst</b>          | 77 | 0  | 1.283395 | 31   | 0.516667 | 22.0453  | 13.44237 | Stalled      | chr15:78235533-78244438   | 6.906   |
| <b>ORF61</b>         | 77 | 0  | 1.283395 | 363  | 6.05     | 49.9868  | 2.490103 | Elongating   | chr10:79439864-79449075   | 7.212   |
| <b>Igtp</b>          | 77 | 0  | 1.283395 | 95   | 1.583333 | 15.5723  | 8.206856 | Stalled      | chr11:58011057-58021093   | 8.037   |
| <b>Trim58</b>        | 77 | 0  | 1.283395 | 9    | 0.15     | 0.479443 | 1.646006 | Unclassified | chr11:58451966-58465906   | 11.941  |
| <b>Mettl10</b>       | 77 | 0  | 1.283395 | 179  | 2.983333 | 8.2159   | 29.76062 | Stalled      | chr7:140019143-140046330  | 25.188  |
| <b>6820408C15Rik</b> | 77 | 0  | 1.283395 | 42   | 0.7      | 0.975321 | 5.569046 | Unclassified | chr2:152239322-152270064  | 28.743  |
| <b>Zbtb44</b>        | 77 | 0  | 1.283395 | 201  | 3.35     | 1.29255  | 66.38894 | Stalled      | chr9:30836228-30883470    | 45.243  |
| <b>Kif20b</b>        | 77 | 0  | 1.283395 | 373  | 6.216667 | 6.50979  | 20.3159  | Stalled      | chr19:34994847-35050221   | 53.375  |
| <b>Usp15</b>         | 77 | 0  | 1.283395 | 1067 | 17.78333 | 12.2405  | 16.10929 | Stalled      | chr10:122550299-122635979 | 83.681  |
| <b>Stag1</b>         | 77 | 0  | 1.283395 | 1603 | 26.71667 | 5.18097  | 49.29297 | Stalled      | chr9:100542041-100858963  | 314.923 |
| <b>Lsm7</b>          | 76 | 0  | 1.266727 | 42   | 0.7      | 20.4626  | 7.219748 | Stalled      | chr10:80315569-80319954   | 2.386   |
| <b>Ccdc124</b>       | 76 | 0  | 1.266727 | 154  | 2.566667 | 64.4537  | 4.473446 | Stalled      | chr8:73392125-73399389    | 5.265   |
| <b>3110056003Rik</b> | 76 | 0  | 1.266727 | 137  | 2.283333 | 4.24791  | 19.05588 | Stalled      | chr10:80316019-80331453   | 13.435  |
| <b>Sema6b</b>        | 76 | 0  | 1.266727 | 120  | 2        | 1.08443  | 1.551299 | Stalled      | chr17:56262507-56281766   | 17.26   |
| <b>Mtif2</b>         | 76 | 0  | 1.266727 | 349  | 5.816667 | 8.52815  | 13.15104 | Stalled      | chr11:29424456-29445255   | 18.8    |
| <b>Tnfsf10</b>       | 76 | 0  | 1.266727 | 36   | 0.6      | 1.82447  | 20.24414 | Stalled      | chr3:27213998-27238587    | 22.59   |
| <b>Cs</b>            | 76 | 0  | 1.266727 | 390  | 6.5      | 45.5527  | 15.95089 | Stalled      | chr10:127772887-127799535 | 24.649  |
| <b>Psmf1</b>         | 76 | 0  | 1.266727 | 309  | 5.15     | 8.96867  | 14.68962 | Stalled      | chr2:151541797-151569029  | 25.233  |
| <b>Prune</b>         | 76 | 0  | 1.266727 | 128  | 2.133333 | 3.55226  | 10.58042 | Stalled      | chr3:95057595-95087998    | 28.404  |
| <b>Etf1</b>          | 76 | 0  | 1.266727 | 974  | 16.23333 | 28.8871  | 15.14873 | Stalled      | chr18:35062438-35093657   | 29.22   |
| <b>Ppil4</b>         | 76 | 58 | 1.266727 | 373  | 6.216667 | 11.3627  | 22.05621 | Stalled      | chr10:7510691-7542361     | 29.671  |
| <b>Rars2</b>         | 76 | 0  | 1.266727 | 269  | 4.833333 | 7.28415  | 55.18909 | Stalled      | chr4:34560206-34607414    | 45.209  |
| <b>Orc3l</b>         | 76 | 0  | 1.266727 | 593  | 9.883333 | 3.7107   | 28.73264 | Stalled      | chr4:34514029-34564191    | 48.163  |
| <b>IL31ra</b>        | 76 | 0  | 1.266727 | 50   | 0.833333 | 0.066424 | 0        | Unclassified | chr13:113313016-113372870 | 57.855  |
| <b>Diap1</b>         | 76 | 0  | 1.266727 | 941  | 15.68333 | 19.4251  | 18.68974 | Stalled      | chr18:38004478-38097065   | 90.588  |
| <b>Nfix</b>          | 76 | 0  | 1.266727 | 451  | 7.516667 | 1.35108  | 2.873609 | Elongating   | chr8:87231497-87326239    | 92.743  |
| <b>Lmbrd1</b>        | 76 | 0  | 1.266727 | 967  | 16.11667 | 4.67909  | 22.30339 | Stalled      | chr1:24683382-24823146    | 137.765 |
| <b>Mef2a</b>         | 76 | 0  | 1.266727 | 1834 | 30.56667 | 9.47999  | 25.75757 | Stalled      | chr7:74378716-74519744    | 139.029 |
| <b>Tbc1d5</b>        | 76 | 0  | 1.266727 | 1005 | 16.75    | 3.06795  | 100.0832 | Stalled      | chr17:50872451-51320674   | 446.224 |
| <b>B930007M17Rik</b> | 76 | 0  | 1.266727 | 306  | 5.1      | 0.209083 | 180.3643 | Stalled      | chr3:138866856-139373263  | 504.408 |



|                      |    |    |          |      |          |          |          |              |                           |          |
|----------------------|----|----|----------|------|----------|----------|----------|--------------|---------------------------|----------|
| <b>Snora64</b>       | 75 | 0  | 1.25006  | 0    | 0        | 29.1349  | 121      | Unclassified | chr17:24855733-24857850   | 0.118    |
| <b>9930021D14Rik</b> | 75 | 0  | 1.25006  | 30   | 0.5      | 1.93681  | 3.032203 | Unclassified | chr17:24608828-24612414   | 1.587    |
| <b>Rpl7</b>          | 75 | 0  | 1.25006  | 137  | 2.283333 | 228.634  | 5.152365 | Stalled      | chr1:16091375-16096514    | 3.14     |
| <b>1110012D08Rik</b> | 75 | 0  | 1.25006  | 14   | 0.233333 | 2.8843   | 8.851869 | Stalled      | chr10:128237091-128243426 | 4.336    |
| <b>Tom7</b>          | 75 | 0  | 1.25006  | 30   | 0.5      | 35.7264  | 25.19121 | Stalled      | chr5:23344761-23351963    | 5.203    |
| <b>Dnttip2</b>       | 75 | 0  | 1.25006  | 227  | 3.783333 | 17.3427  | 9.739997 | Stalled      | chr3:121975331-121988189  | 10.859   |
| <b>Tmem14a</b>       | 75 | 0  | 1.25006  | 23   | 0.383333 | 6.87908  | 34.24897 | Stalled      | chr1:21206711-21220248    | 11.538   |
| <b>Pex5</b>          | 75 | 0  | 1.25006  | 170  | 2.833333 | 8.19891  | 7.186715 | Stalled      | chr6:124346833-124367085  | 18.253   |
| <b>Bcat2</b>         | 75 | 0  | 1.25006  | 263  | 4.383333 | 28.0948  | 13.3031  | Stalled      | chr7:52823732-52845078    | 19.347   |
| <b>Med17</b>         | 75 | 0  | 1.25006  | 335  | 5.583333 | 8.94386  | 17.33846 | Stalled      | chr9:15064794-15086311    | 19.518   |
| <b>Xkr7</b>          | 75 | 0  | 1.25006  | 38   | 0.633333 | 0.137098 | 0.376282 | Unclassified | chr2:152855587-152881511  | 23.925   |
| <b>Ddx59</b>         | 75 | 0  | 1.25006  | 103  | 1.716667 | 1.97138  | 62.30152 | Stalled      | chr1:138309847-138336728  | 24.882   |
| <b>Cdk11b</b>        | 75 | 0  | 1.25006  | 398  | 6.633333 | 32.269   | 21.0964  | Stalled      | chr4:154996977-155024041  | 25.065   |
| <b>Gsn</b>           | 75 | 0  | 1.25006  | 77   | 1.283333 | 15.611   | 1.446212 | Unclassified | chr2:35135959-35163412    | 25.454   |
| <b>Atp6v1e1</b>      | 75 | 0  | 1.25006  | 457  | 7.616667 | 18.8745  | 13.51022 | Stalled      | chr6:120745261-120774703  | 27.443   |
| <b>Gspt1</b>         | 75 | 0  | 1.25006  | 573  | 9.55     | 18.2469  | 24.49762 | Stalled      | chr16:11216333-11256418   | 38.086   |
| <b>Ccdc62</b>        | 75 | 0  | 1.25006  | 67   | 1.116667 | 0.944786 | 120.208  | Stalled      | chr5:124378697-124419904  | 39.208   |
| <b>Rfx2</b>          | 75 | 0  | 1.25006  | 163  | 2.716667 | 0.926797 | 8.474004 | Stalled      | chr17:56915320-56972431   | 55.112   |
| <b>Phip</b>          | 75 | 0  | 1.25006  | 2323 | 38.71667 | 10.3458  | 22.18921 | Stalled      | chr9:82759765-82871096    | 109.332  |
| <b>2310003F16Rik</b> | 74 | 0  | 1.233392 | 2    | 0.033333 | 176.454  | 31.20442 | Unclassified | chr2:121280823-121284175  | 1.353    |
| <b>Alg3</b>          | 74 | 0  | 1.233392 | 88   | 1.466667 | 13.7774  | 9.163436 | Stalled      | chr16:20605530-20612822   | 5.293    |
| <b>Serinc4</b>       | 74 | 0  | 1.233392 | 146  | 2.433333 | 0.681706 | 5.453635 | Stalled      | chr2:121276913-121284500  | 5.588    |
| <b>Pomc</b>          | 74 | 0  | 1.233392 | 215  | 3.583333 | 10.4592  | 0.021255 | Stalled      | chr12:3952950-3960618     | 5.669    |
| <b>Flad1</b>         | 74 | 0  | 1.233392 | 71   | 1.183333 | 13.6937  | 7.654915 | Stalled      | chr3:89206594-89217785    | 9.192    |
| <b>Fads1</b>         | 74 | 0  | 1.233392 | 203  | 3.383333 | 13.0589  | 8.716757 | Stalled      | chr19:10255377-10271360   | 13.984   |
| <b>Zfp113</b>        | 74 | 0  | 1.233392 | 109  | 1.816667 | 0.966678 | 16.0089  | Stalled      | chr5:138580929-138598972  | 16.044   |
| <b>BC024814</b>      | 74 | 0  | 1.233392 | 295  | 4.916667 | 6.80267  | 11.14708 | Stalled      | chr16:8468905-8490290     | 19.386   |
| <b>Sord</b>          | 74 | 0  | 1.233392 | 52   | 0.866667 | 3.29435  | 9.411043 | Stalled      | chr2:122058574-122091073  | 30.5     |
| <b>Cbw1</b>          | 74 | 0  | 1.233392 | 151  | 2.516667 | 6.48699  | 27.08561 | Stalled      | chr19:24994918-25038048   | 41.131   |
| <b>Acbd6</b>         | 74 | 0  | 1.233392 | 501  | 8.35     | 43.4673  | 45.41215 | Stalled      | chr1:157403249-157534362  | 129.114  |
| <b>Dclk2</b>         | 74 | 0  | 1.233392 | 426  | 7.1      | 3.93618  | 10.99039 | Stalled      | chr3:86590072-86726803    | 134.732  |
| <b>Ppp1r9a</b>       | 74 | 0  | 1.233392 | 204  | 3.4      | 0.0644   | 1.684841 | Unclassified | chr6:4851319-5115661      | 262.343  |
| <b>Cdh4</b>          | 74 | 0  | 1.233392 | 609  | 10.15    | 0.060019 | 0.85623  | Unclassified | chr2:179175182-179634080  | 456.899  |
| <b>Cryaa</b>         | 73 | 0  | 1.216725 | 14   | 0.233333 | 0.043593 | 0.828616 | Unclassified | chr17:31812889-31818669   | 3.781    |
| <b>Sbds</b>          | 73 | 0  | 1.216725 | 391  | 6.516667 | 35.1708  | 5.592227 | Stalled      | chr5:130721601-130733332  | 9.732    |
| <b>Zfp748</b>        | 73 | 0  | 1.216725 | 77   | 1.283333 | 3.29615  | 19.54144 | Stalled      | chr13:67639589-67656088   | 14.5     |
| <b>Ubxn4</b>         | 73 | 0  | 1.216725 | 315  | 5.25     | 19.6261  | 28.7923  | Stalled      | chr1:130138757-130175954  | 35.198   |
| <b>Tgm3</b>          | 73 | 0  | 1.216725 | 46   | 0.766667 | 0.015592 | 0.445963 | Unclassified | chr2:129836109-129876135  | 38.027   |
| <b>Anks6</b>         | 73 | 0  | 1.216725 | 62   | 1.033333 | 0.104638 | 1.18747  | Unclassified | chr4:47028560-47072178    | 41.619   |
| <b>Sic37a3</b>       | 73 | 0  | 1.216725 | 311  | 5.183333 | 1.98135  | 13.30789 | Stalled      | chr6:39284771-39329706    | 42.936   |
| <b>Pip5k1b</b>       | 73 | 0  | 1.216725 | 1461 | 24.35    | 0.821809 | 7.554562 | Stalled      | chr19:24369285-24632317   | 261.033  |
| <b>Hist1h4k</b>      | 72 | 0  | 1.200058 | 0    | 0        | 0        | 236      | Unclassified | chr13:21842062-21844374   | 0.313    |
| <b>Hist1h2ag</b>     | 72 | 0  | 1.200058 | 0    | 0        | 0        | 369      | Unclassified | chr13:22134345-22136818   | 0.474    |
| <b>Hmgb1</b>         | 72 | 0  | 1.200058 | 327  | 5.45     | 0        | 5.408208 | Stalled      | chr5:149858803-149866613  | 5.811    |
| <b>Magoos</b>        | 72 | 0  | 1.200058 | 109  | 1.816667 | 48.8136  | 12.70819 | Stalled      | chr4:107550417-107560003  | 7.587    |
| <b>Dtymk</b>         | 72 | 0  | 1.200058 | 262  | 4.366667 | 48.4975  | 6.889007 | Stalled      | chr1:95689152-95700511    | 9.36     |
| <b>C920016K16Rik</b> | 72 | 0  | 1.200058 | 85   | 1.416667 | 3.84046  | 10.22467 | Stalled      | chr17:33128083-33142402   | 12.32    |
| <b>Zc3h15</b>        | 72 | 0  | 1.200058 | 245  | 4.083333 | 25.0216  | 24.37328 | Stalled      | chr2:83482734-83504773    | 20.04    |
| <b>Fastkd1</b>       | 72 | 0  | 1.200058 | 75   | 1.25     | 1.5346   | 0.496753 | Unclassified | chr2:69524880-69552663    | 25.784   |
| <b>Sp4</b>           | 72 | 0  | 1.200058 | 212  | 3.533333 | 1.66572  | 93.24402 | Stalled      | chr12:119473405-119541913 | 66.509   |
| <b>Cox10</b>         | 72 | 0  | 1.200058 | 897  | 14.95    | 8.23615  | 27.96646 | Stalled      | chr11:63777387-63894916   | 115.53   |
| <b>Bank1</b>         | 72 | 57 | 1.200058 | 1671 | 27.85    | 13.4635  | 16.92183 | Stalled      | chr3:135716327-135991010  | 272.684  |
| <b>Hist1h2ae</b>     | 71 | 31 | 1.18339  | 0    | 0        | 0        | 285      | Unclassified | chr13:23662385-23665089   | 0.705    |
| <b>Nrp</b>           | 71 | 0  | 1.18339  | 16   | 0.266667 | 0        | 3.479006 | Unclassified | chr12:88783797-88786967   | 1.171    |
| <b>H2-Q7</b>         | 71 | 0  | 1.18339  | 127  | 2.116667 | 183.744  | 3.680623 | Stalled      | chr17:35574160-35580588   | 4.429    |
| <b>1810035L17Rik</b> | 71 | 0  | 1.18339  | 157  | 2.616667 | 19.2363  | 11.48393 | Stalled      | chr12:88782845-88790873   | 6.029    |
| <b>Alkbh1</b>        | 71 | 0  | 1.18339  | 873  | 14.55    | 53.0038  | 6.136263 | Stalled      | chr12:88769027-88786789   | 15.763   |
| <b>Dpy30</b>         | 71 | 0  | 1.18339  | 132  | 2.2      | 32.458   | 42.19402 | Stalled      | chr17:74698813-74717734   | 16.922   |
| <b>Glt28d2</b>       | 71 | 0  | 1.18339  | 28   | 0.466667 | 0.98059  | 11.94359 | Stalled      | chr3:85673767-85693440    | 17.674   |
| <b>Gsto2</b>         | 71 | 0  | 1.18339  | 123  | 2.05     | 0.127672 | 26.01496 | Stalled      | chr19:47938283-47960795   | 20.513   |
| <b>Sag</b>           | 71 | 0  | 1.18339  | 202  | 3.366667 | 0.179041 | 1.335505 | Unclassified | chr1:89698254-89741732    | 41.479   |
| <b>Mapk1</b>         | 71 | 0  | 1.18339  | 1048 | 17.46667 | 21.4474  | 20.37959 | Stalled      | chr16:16981474-17047546   | 64.073   |
| <b>Dlgap2</b>        | 71 | 0  | 1.18339  | 683  | 11.38333 | 0.05815  | 2.618236 | Unclassified | chr8:14093874-14847684    | 751.811  |
| <b>Ii1rap1</b>       | 71 | 34 | 1.18339  | 258  | 4.3      | 0.023405 | 0        | Unclassified | chrX:83992581-85362962    | 1368.382 |
| <b>Agpr</b>          | 70 | 0  | 1.166723 | 36   | 0.6      | 5.79686  | 0.082236 | Unclassified | chr8:108090597-108094198  | 1.602    |
| <b>Ctu1</b>          | 70 | 0  | 1.166723 | 61   | 1.016667 | 3.3429   | 7.472566 | Stalled      | chr7:50925400-50933667    | 6.268    |
| <b>Cdk9</b>          | 70 | 0  | 1.166723 | 271  | 4.516667 | 23.1943  | 3.793086 | Stalled      | chr2:32561301-32570304    | 7.004    |
| <b>Nfu1</b>          | 70 | 0  | 1.166723 | 163  | 2.716667 | 33.524   | 21.17114 | Stalled      | chr6:86957829-86978450    | 18.622   |
| <b>Nudt13</b>        | 70 | 0  | 1.166723 | 105  | 1.75     | 2.86486  | 3.277349 | Stalled      | chr14:21111911-21136797   | 22.887   |
| <b>Wars</b>          | 70 | 0  | 1.166723 | 665  | 11.08333 | 17.655   | 2.031105 | Elongating   | chr12:110098239-110133421 | 33.183   |
| <b>Nuf2</b>          | 70 | 0  | 1.166723 | 413  | 6.883333 | 9.83142  | 10.66068 | Stalled      | chr1:171428064-171463595  | 33.532   |
| <b>5730455O13Rik</b> | 70 | 0  | 1.166723 | 122  | 2.033333 | 9.34053  | 38.93447 | Stalled      | chr19:38262968-38300622   | 35.655   |
| <b>Bcno1</b>         | 70 | 0  | 1.166723 | 80   | 1.333333 | 0.228177 | 0.630805 | Unclassified | chr8:119617764-119657620  | 37.857   |
| <b>St7l</b>          | 70 | 0  | 1.166723 | 142  | 2.366667 | 2.75597  | 109.0779 | Stalled      | chr3:104665998-104729757  | 61.76    |
| <b>Dpysl2</b>        | 70 | 31 | 1.166723 | 559  | 9.316667 | 2.85932  | 30.203   | Stalled      | chr14:67421700-67489437   | 65.738   |
| <b>Cit</b>           | 70 | 0  | 1.166723 | 1969 | 32.81667 | 6.57822  | 7.351633 | Stalled      | chr5:116293664-116456350  | 160.687  |
| <b>Hecw2</b>         | 70 | 0  | 1.166723 | 554  | 9.233333 | 0.079106 | 1.645464 | Unclassified | chr1:53863717-54253878    | 388.162  |
| <b>Rgs9bp</b>        | 69 | 0  | 1.150055 | 4    | 0.066667 | 1.63951  | 3.497393 | Unclassified | chr7:36364012-36372601    | 6.59     |
| <b>B230219D22Rik</b> | 69 | 0  | 1.150055 | 374  | 6.233333 | 10.1977  | 11.61921 | Stalled      | chr13:55792484-55804861   | 10.378   |
| <b>Mfap3</b>         | 69 | 0  | 1.150055 | 254  | 4.233333 | 5.67741  | 12.03455 | Stalled      | chr11:57330166-57347319   | 15.154   |
| <b>Fam114a2</b>      | 69 | 0  | 1.150055 | 235  | 3.916667 | 8.10768  | 29.0439  | Stalled      | chr11:57296493-57334146   | 35.654   |
| <b>Rbm25</b>         | 69 | 0  | 1.150055 | 939  | 15.65    | 32.2802  | 19.0202  | Stalled      | chr12:84971183-85024073   | 50.891   |
| <b>Dync1i2</b>       | 69 | 0  | 1.150055 | 176  | 2.933333 | 11.2925  | 12.88835 | Stalled      | chr2:71048069-71101351    | 51.283   |
| <b>Vrk1</b>          | 69 | 0  | 1.150055 | 917  | 15.28333 | 12.4816  | 14.19667 | Stalled      | chr12:107246472-107315620 | 67.149   |
| <b>Papss1</b>        | 69 | 0  | 1.150055 | 230  | 3.833333 | 7.8537   | 46.30155 | Stalled      | chr3:131225731-131306634  | 78.904   |
| <b>Rpl13</b>         | 68 | 0  | 1.133388 | 322  | 5.366667 | 0        | 2.979141 | Stalled      | chr8:125624249-125629140  | 2.892    |

|                      |    |    |          |      |           |          |          |              |                           |         |
|----------------------|----|----|----------|------|-----------|----------|----------|--------------|---------------------------|---------|
| <b>Synpo2l</b>       | 68 | 0  | 1.133388 | 53   | 0.883333  | 1.44401  | 0.777468 | Unclassified | chr14:21478639-21489528   | 8.89    |
| <b>Cyp2r1</b>        | 68 | 0  | 1.133388 | 25   | 0.416667  | 0.575749 | 38.17079 | Stalled      | chr7:121693681-121708486  | 12.806  |
| <b>Zfp667</b>        | 68 | 0  | 1.133388 | 66   | 1.1       | 1.12408  | 20.23324 | Stalled      | chr7:6236181-6259485      | 21.305  |
| <b>Slc2a5</b>        | 68 | 0  | 1.133388 | 123  | 2.05      | 0.086932 | 0.649095 | Unclassified | chr4:149491452-149518277  | 24.826  |
| <b>Wtap</b>          | 68 | 0  | 1.133388 | 427  | 17.116667 | 10.5237  | 18.07417 | Stalled      | chr17:13159664-13187405   | 25.742  |
| <b>Jak2</b>          | 68 | 0  | 1.133388 | 267  | 4.45      | 4.53002  | 26.6974  | Stalled      | chr19:29324317-29387570   | 61.254  |
| <b>Spaca4</b>        | 67 | 0  | 1.11672  | 0    | 0         | 0.361532 | 110      | Unclassified | chr7:52980477-52983186    | 0.71    |
| <b>Pcbp1</b>         | 67 | 0  | 1.11672  | 52   | 0.866667  | 213.193  | 5.202772 | Unclassified | chr6:86474490-86478159    | 1.67    |
| <b>Nanos3</b>        | 67 | 0  | 1.11672  | 6    | 0.1       | 0.05267  | 0.931339 | Unclassified | chr8:86697631-86702451    | 2.821   |
| <b>H2-D1</b>         | 67 | 0  | 1.11672  | 394  | 6.566667  | 540.333  | 3.98416  | Stalled      | chr17:35398038-35404442   | 4.405   |
| <b>Ints5</b>         | 67 | 0  | 1.11672  | 174  | 2.9       | 13.5766  | 5.903049 | Stalled      | chr19:8965476-8972379     | 4.904   |
| <b>Hsp90ab1</b>      | 67 | 0  | 1.11672  | 809  | 13.48333  | 819.113  | 2.888978 | Stalled      | chr17:45704726-45712210   | 5.485   |
| <b>Cops8</b>         | 67 | 0  | 1.11672  | 210  | 3.5       | 16.7492  | 10.34713 | Stalled      | chr1:92497999-92509916    | 9.918   |
| <b>Tbc1d10b</b>      | 67 | 0  | 1.11672  | 212  | 3.533333  | 25.3696  | 3.426692 | Stalled      | chr7:134340973-134353982  | 11.01   |
| <b>Smarcd1</b>       | 67 | 0  | 1.11672  | 205  | 3.416667  | 9.43294  | 8.738399 | Stalled      | chr15:99530717-99544426   | 11.71   |
| <b>Trcg1</b>         | 67 | 0  | 1.11672  | 655  | 10.91667  | 0.071175 | 0.166025 | Stalled      | chr9:57082362-57097671    | 13.31   |
| <b>Ccrn4l</b>        | 67 | 0  | 1.11672  | 249  | 4.15      | 4.75966  | 20.95128 | Stalled      | chr3:51026368-51055676    | 27.209  |
| <b>Uggt2</b>         | 67 | 0  | 1.11672  | 178  | 2.966667  | 0.431179 | 0.778525 | Unclassified | chr14:119384206-119500656 | 114.451 |
| <b>Ccl17</b>         | 66 | 0  | 1.100053 | 4    | 0.066667  | 0.099932 | 0.382199 | Unclassified | chr8:97332352-97335935    | 1.584   |
| <b>Neil1</b>         | 66 | 0  | 1.100053 | 261  | 4.35      | 39.2331  | 1.085526 | Elongating   | chr9:56991062-56996841    | 3.78    |
| <b>Ccdc110</b>       | 66 | 0  | 1.100053 | 8    | 0.133333  | 0.078089 | 4.635835 | Unclassified | chr8:47018002-47029499    | 9.498   |
| <b>A130042E20Rik</b> | 66 | 0  | 1.100053 | 65   | 1.083333  | 1.50193  | 32.89463 | Stalled      | chr10:75922311-75933859   | 9.549   |
| <b>Cops2</b>         | 66 | 0  | 1.100053 | 328  | 5.466667  | 12.6687  | 11.84325 | Stalled      | chr2:125656039-125686754  | 28.716  |
| <b>Pkd2l2</b>        | 66 | 0  | 1.100053 | 190  | 3.166667  | 1.53892  | 20.37686 | Stalled      | chr18:34567076-34602440   | 33.365  |
| <b>Mcm3ap</b>        | 66 | 0  | 1.100053 | 589  | 9.816667  | 9.80447  | 20.45448 | Stalled      | chr10:75929715-75978602   | 46.888  |
| <b>Spred1</b>        | 66 | 0  | 1.100053 | 228  | 3.8       | 2.12453  | 31.15094 | Stalled      | chr2:116945185-117005072  | 57.888  |
| <b>Pten</b>          | 66 | 0  | 1.100053 | 591  | 9.85      | 8.90476  | 34.99394 | Stalled      | chr19:32830066-32900650   | 68.585  |
| <b>Galk2</b>         | 66 | 0  | 1.100053 | 1087 | 18.11667  | 16.2614  | 13.72904 | Stalled      | chr2:125682953-125810034  | 125.082 |
| <b>Nme3</b>          | 65 | 0  | 1.083385 | 2    | 0.033333  | 17.0118  | 3.05865  | Unclassified | chr17:25031444-25034472   | 1.029   |
| <b>Elov3</b>         | 65 | 0  | 1.083385 | 12   | 0.2       | 0.522034 | 1.134149 | Unclassified | chr19:46204388-46210184   | 3.797   |
| <b>Prrg2</b>         | 65 | 0  | 1.083385 | 298  | 4.966667  | 5.22958  | 0.254115 | Stalled      | chr7:52308976-52319022    | 8.047   |
| <b>Cabp1</b>         | 65 | 0  | 1.083385 | 45   | 0.75      | 0.249598 | 1.069931 | Unclassified | chr5:115618699-115638130  | 17.432  |
| <b>Cacnb1</b>        | 65 | 0  | 1.083385 | 120  | 2         | 3.29137  | 11.06932 | Stalled      | chr11:97864215-97885941   | 19.727  |
| <b>Xpo1</b>          | 65 | 0  | 1.083385 | 1056 | 17.6      | 14.8142  | 11.20695 | Stalled      | chr11:23154040-23197597   | 41.558  |
| <b>Metap1l</b>       | 65 | 0  | 1.083385 | 346  | 5.766667  | 8.70059  | 36.20471 | Stalled      | chr2:71289394-71363248    | 71.855  |
| <b>Atp13a3</b>       | 65 | 0  | 1.083385 | 556  | 9.266667  | 4.83118  | 37.25005 | Stalled      | chr16:30312509-30390616   | 76.108  |
| <b>Cfdp1</b>         | 65 | 0  | 1.083385 | 562  | 9.366667  | 58.4417  | 14.82101 | Stalled      | chr8:114292372-114380210  | 85.839  |
| <b>Pde8a</b>         | 65 | 0  | 1.083385 | 931  | 15.51667  | 4.65174  | 9.620411 | Stalled      | chr7:88356689-88478508    | 119.82  |
| <b>Kcnj9</b>         | 64 | 0  | 1.066718 | 50   | 0.833333  | 0.634502 | 0        | Unclassified | chr1:174251163-174261394  | 8.232   |
| <b>Rbak</b>          | 64 | 0  | 1.066718 | 56   | 0.933333  | 2.06253  | 11.88873 | Stalled      | chr5:143933867-143944422  | 8.556   |
| <b>Gpr114</b>        | 64 | 0  | 1.066718 | 30   | 0.5       | 0.04102  | 0.382691 | Unclassified | chr8:97445593-97467190    | 19.598  |
| <b>Arpp19</b>        | 64 | 0  | 1.066718 | 365  | 6.083333  | 15.1428  | 12.90721 | Stalled      | chr9:74883420-74908120    | 22.701  |
| <b>4933411G11Rik</b> | 64 | 0  | 1.066718 | 20   | 0.333333  | 0.36524  | 49.79744 | Stalled      | chr5:143940695-143966747  | 24.053  |
| <b>Bzw2</b>          | 64 | 0  | 1.066718 | 667  | 11.11667  | 25.5574  | 25.99977 | Stalled      | chr12:36818421-36885412   | 64.992  |
| <b>Snord32a</b>      | 63 | 0  | 1.05005  | 0    | 0         | 0        | 150      | Unclassified | chr7:52382752-52384833    | 0.082   |
| <b>Fadd</b>          | 63 | 0  | 1.05005  | 67   | 1.116667  | 5.90955  | 15.68274 | Stalled      | chr7:151764227-151770341  | 4.115   |
| <b>Eno3</b>          | 63 | 0  | 1.05005  | 197  | 3.283333  | 3.45638  | 0.619755 | Stalled      | chr11:70468714-70476015   | 5.302   |
| <b>2310046O06Rik</b> | 63 | 0  | 1.05005  | 155  | 2.583333  | 5.85957  | 7.298276 | Stalled      | chr9:57383334-57390994    | 5.661   |
| <b>Rcn3</b>          | 63 | 0  | 1.05005  | 129  | 2.15      | 24.7293  | 1.874211 | Elongating   | chr7:52338283-52349583    | 9.301   |
| <b>Rhpn1</b>         | 63 | 0  | 1.05005  | 32   | 0.533333  | 0.37947  | 0.666051 | Unclassified | chr15:75532717-75544848   | 10.132  |
| <b>Zbtb37</b>        | 63 | 8  | 1.05005  | 87   | 1.45      | 1.05932  | 19.51266 | Stalled      | chr1:162947886-162966390  | 16.505  |
| <b>Btf3l4</b>        | 63 | 0  | 1.05005  | 144  | 2.4       | 3.74301  | 23.10452 | Stalled      | chr4:108486899-108508189  | 19.291  |
| <b>Snord34</b>       | 62 | 0  | 1.033383 | 0    | 0         | 0        | 246      | Unclassified | chr7:52381972-52384038    | 0.067   |
| <b>Car11</b>         | 62 | 0  | 1.033383 | 129  | 2.15      | 0.872222 | 0.250678 | Stalled      | chr7:52953336-52960031    | 4.696   |
| <b>Dnajb5</b>        | 62 | 0  | 1.033383 | 62   | 1.033333  | 5.68797  | 1.114046 | Stalled      | chr4:42963965-42971604    | 5.64    |
| <b>Ggnbp1</b>        | 62 | 0  | 1.033383 | 20   | 0.333333  | 0.714353 | 3.74932  | Unclassified | chr17:27164203-27173323   | 7.121   |
| <b>Sdad1</b>         | 62 | 0  | 1.033383 | 680  | 11.33333  | 12.4372  | 6.848196 | Stalled      | chr5:92713035-92741050    | 26.016  |
| <b>Mtvr2</b>         | 61 | 0  | 1.016715 | 8    | 0.133333  | 14.221   | 11.22145 | Unclassified | chr19:5728087-5731666     | 1.58    |
| <b>Gsx2</b>          | 61 | 0  | 1.016715 | 4    | 0.066667  | 0.731048 | 1.466566 | Unclassified | chr5:75469625-75473918    | 2.294   |
| <b>Sub1</b>          | 61 | 0  | 1.016715 | 930  | 15.5      | 64.7228  | 6.084118 | Stalled      | chr15:11911093-11927762   | 14.67   |
| <b>Hist1h3a</b>      | 60 | 4  | 1.000048 | 0    | 0         | 0        | 326      | Unclassified | chr13:23853721-23856255   | 0.535   |
| <b>Mbd6</b>          | 60 | 0  | 1.000048 | 222  | 3.7       | 8.97951  | 2.808702 | Stalled      | chr10:126719011-126727827 | 6.817   |
| <b>Snord33</b>       | 59 | 0  | 0.98338  | 0    | 0         | 0        | 245      | Unclassified | chr7:52382233-52384315    | 0.083   |
| <b>Hist1h2bh</b>     | 59 | 39 | 0.98338  | 0    | 0         | 0        | 274      | Unclassified | chr13:23634840-23637221   | 0.382   |
| <b>Ankdd1b</b>       | 59 | 0  | 0.98338  | 211  | 3.516667  | 0.245487 | 0.611573 | Unclassified | chr13:97186088-97243115   | 55.028  |
| <b>Hspb6</b>         | 58 | 0  | 0.966713 | 52   | 0.866667  | 2.95931  | 1.393233 | Elongating   | chr7:31336320-31340458    | 2.139   |
| <b>1700019N12Rik</b> | 58 | 0  | 0.966713 | 10   | 0.166667  | 2.50984  | 0.981599 | Unclassified | chr19:6996915-7001870     | 2.956   |
| <b>Kazald1</b>       | 58 | 0  | 0.966713 | 14   | 0.233333  | 1.24423  | 5.462605 | Stalled      | chr19:45148628-45153779   | 3.152   |
| <b>Six5</b>          | 58 | 0  | 0.966713 | 14   | 0.233333  | 0.893953 | 12.34434 | Stalled      | chr7:19677892-19683694    | 3.803   |
| <b>Myl6b</b>         | 58 | 0  | 0.966713 | 137  | 2.283333  | 7.36052  | 1.281079 | Elongating   | chr10:127931212-127937741 | 4.53    |
| <b>Lgi3</b>          | 58 | 0  | 0.966713 | 7    | 0.116667  | 0.072545 | 0.96327  | Unclassified | chr14:70928627-70938130   | 7.504   |
| <b>2210408I21Rik</b> | 58 | 36 | 0.966713 | 307  | 5.116667  | 0.893124 | 81.53776 | Stalled      | chr13:77272796-7752940    | 478.145 |
| <b>Hist1h4j</b>      | 57 | 0  | 0.950046 | 0    | 0         | 0        | 255      | Unclassified | chr13:21824964-21827276   | 0.313   |
| <b>Gjd3</b>          | 57 | 0  | 0.950046 | 0    | 0         | 5.11386  | 17       | Unclassified | chr11:98843493-98846330   | 0.838   |
| <b>Actg1</b>         | 57 | 0  | 0.950046 | 168  | 2.8       | 115.742  | 5.320432 | Stalled      | chr11:120207003-120211798 | 2.796   |
| <b>Aftph</b>         | 57 | 0  | 0.950046 | 586  | 9.766667  | 8.91944  | 19.08887 | Stalled      | chr11:20585087-20643487   | 56.401  |
| <b>B230120H23Rik</b> | 57 | 0  | 0.950046 | 1042 | 17.36667  | 3.57332  | 8.59303  | Stalled      | chr2:72121693-72280665    | 156.973 |
| <b>Dst</b>           | 57 | 0  | 0.950046 | 440  | 7.333333  | 0.343205 | 11.25698 | Stalled      | chr1:34066669-34365497    | 296.829 |
| <b>Galr3</b>         | 56 | 0  | 0.933378 | 9    | 0.15      | 0        | 0.55814  | Unclassified | chr15:78870314-78873988   | 1.675   |
| <b>Fcgr3</b>         | 56 | 0  | 0.933378 | 34   | 0.566667  | 2.6761   | 0.350955 | Unclassified | chr1:172981299-172991534  | 8.236   |
| <b>C1cn2</b>         | 56 | 0  | 0.933378 | 55   | 0.916667  | 1.12141  | 5.804941 | Stalled      | chr16:20703038-20718709   | 13.672  |
| <b>Map2k4</b>        | 56 | 0  | 0.933378 | 557  | 9.283333  | 4.58893  | 21.89294 | Stalled      | chr11:65501745-65603799   | 100.055 |
| <b>Hist1h4b</b>      | 55 | 0  | 0.916711 | 0    | 0         | 0        | 223      | Unclassified | chr13:23846889-23849201   | 0.313   |
| <b>Amn</b>           | 55 | 0  | 0.916711 | 43   | 0.716667  | 0.562853 | 0.912357 | Unclassified | chr12:112507321-112514637 | 5.317   |
| <b>Pacsin3</b>       | 55 | 0  | 0.916711 | 27   | 0.45      | 1.98526  | 2.433448 | Unclassified | chr2:91094969-91104836    | 7.868   |
| <b>Pcgf5</b>         | 55 | 0  | 0.916711 | 560  | 9.333333  | 9.61319  | 4.428502 | Stalled      | chr19:36451556-36530694   | 77.139  |

|                      |    |    |          |      |           |          |          |              |                           |         |
|----------------------|----|----|----------|------|-----------|----------|----------|--------------|---------------------------|---------|
| <b>Hist1h2bj</b>     | 54 | 0  | 0.900043 | 0    | 0         | 0        | 355      | Unclassified | chr13:22133098-22135479   | 0.382   |
| <b>Hrc</b>           | 54 | 0  | 0.900043 | 12   | 0.2       | 0.179323 | 1.655559 | Unclassified | chr7:52588638-52594342    | 3.705   |
| <b>Tas1r2</b>        | 54 | 0  | 0.900043 | 28   | 0.466667  | 0.046284 | 0.359898 | Unclassified | chr4:139207452-139226194  | 16.743  |
| <b>Eapp</b>          | 54 | 58 | 0.900043 | 166  | 2.766667  | 18.1469  | 27.63501 | Stalled      | chr12:55774453-55798852   | 22.4    |
| <b>Stim1</b>         | 54 | 0  | 0.900043 | 655  | 10.91667  | 12.2345  | 27.35786 | Stalled      | chr7:109414337-109585369  | 169.033 |
| <b>Kcna3</b>         | 53 | 0  | 0.883376 | 22   | 0.366667  | 16.628   | 3.079673 | Unclassified | chr3:106837079-106841047  | 1.969   |
| <b>Fut7</b>          | 53 | 0  | 0.883376 | 4    | 0.066667  | 0.328473 | 5.146165 | Unclassified | chr2:25276803-25281891    | 3.089   |
| <b>Hpd</b>           | 53 | 0  | 0.883376 | 19   | 0.316667  | 0.103433 | 0.684256 | Unclassified | chr5:123621815-123634695  | 10.881  |
| <b>Usp1</b>          | 53 | 0  | 0.883376 | 173  | 2.883333  | 19.5092  | 11.61668 | Stalled      | chr4:98588500-98602224    | 11.725  |
| <b>Kif22</b>         | 53 | 0  | 0.883376 | 230  | 3.833333  | 24.8736  | 7.247453 | Stalled      | chr7:134171244-134187934  | 14.691  |
| <b>Tcea1</b>         | 53 | 0  | 0.883376 | 228  | 3.8       | 10.3735  | 35.51381 | Stalled      | chr1:4845774-4887987      | 40.214  |
| <b>Mepce</b>         | 52 | 0  | 0.866708 | 278  | 4.633333  | 24.4102  | 5.187582 | Stalled      | chr5:138223133-138229929  | 4.797   |
| <b>2510012J08Rik</b> | 52 | 0  | 0.866708 | 237  | 3.95      | 25.4268  | 3.958117 | Stalled      | chr10:80781847-80788996   | 5.15    |
| <b>Flot2</b>         | 52 | 0  | 0.866708 | 135  | 2.25      | 7.42831  | 11.39935 | Stalled      | chr11:77849442-77873934   | 22.493  |
| <b>Csnk1e</b>        | 52 | 0  | 0.866708 | 336  | 5.6       | 0.68802  | 2.584248 | Elongating   | chr15:79248281-79274487   | 24.207  |
| <b>Epha2</b>         | 52 | 0  | 0.866708 | 191  | 3.183333  | 2.1582   | 4.105712 | Stalled      | chr4:140855154-140885293  | 28.14   |
| <b>Hist1h2bl</b>     | 51 | 0  | 0.850041 | 0    | 0         | 0        | 261      | Unclassified | chr13:21807631-21810012   | 0.382   |
| <b>Nrm</b>           | 51 | 0  | 0.850041 | 117  | 1.95      | 13.9702  | 6.317778 | Stalled      | chr17:35996262-36002345   | 4.084   |
| <b>Plcb2</b>         | 51 | 0  | 0.850041 | 202  | 3.366667  | 2.9392   | 7.900146 | Stalled      | chr2:118533252-118556174  | 20.923  |
| <b>Prkd2</b>         | 51 | 38 | 0.850041 | 1071 | 17.85     | 36.4475  | 6.567038 | Stalled      | chr7:17426413-17455810    | 27.398  |
| <b>St6galnac3</b>    | 51 | 0  | 0.850041 | 1039 | 17.31667  | 0.580519 | 8.021796 | Stalled      | chr3:152865472-153390097  | 522.626 |
| <b>Hist1h2ah</b>     | 50 | 0  | 0.833373 | 0    | 0         | 0        | 246      | Unclassified | chr13:22127034-22129421   | 0.388   |
| <b>Mtss1l</b>        | 50 | 0  | 0.833373 | 57   | 0.95      | 0.152413 | 5.232988 | Stalled      | chr8:113243383-113265300  | 19.918  |
| <b>Bivm</b>          | 50 | 0  | 0.833373 | 27   | 0.45      | 0.556096 | 21.55359 | Stalled      | chr1:44174812-44201616    | 24.805  |
| <b>Marcks</b>        | 49 | 0  | 0.816706 | 272  | 4.533333  | 6.5734   | 1.134485 | Elongating   | chr10:36853048-36860732   | 5.685   |
| <b>Nr1h3</b>         | 49 | 0  | 0.816706 | 48   | 0.8       | 0.694527 | 1.548512 | Unclassified | chr2:91024218-91037192    | 10.975  |
| <b>Snord35b</b>      | 48 | 0  | 0.800038 | 0    | 0         | 0        | 121      | Unclassified | chr7:52378395-52380481    | 0.087   |
| <b>Tnnt1</b>         | 48 | 0  | 0.800038 | 48   | 0.8       | 2.29081  | 0.53061  | Unclassified | chr7:4456264-4469577      | 11.314  |
| <b>Tuba8</b>         | 48 | 0  | 0.800038 | 43   | 0.716667  | 0.292428 | 1.49966  | Unclassified | chr6:121158787-121176115  | 15.329  |
| <b>Epha4</b>         | 48 | 0  | 0.800038 | 96   | 1.6       | 0.129621 | 0        | Unclassified | chr1:77363759-77513663    | 147.905 |
| <b>Ntn5</b>          | 47 | 0  | 0.783371 | 15   | 0.25      | 0.16285  | 3.029409 | Unclassified | chr7:52937783-52949924    | 10.142  |
| <b>Hist1h2bb</b>     | 46 | 0  | 0.766703 | 0    | 0         | 0        | 345      | Unclassified | chr13:23836602-23839070   | 0.469   |
| <b>Foxj1</b>         | 46 | 0  | 0.766703 | 13   | 0.216667  | 0.547281 | 5.261261 | Stalled      | chr11:116192019-116198668 | 4.65    |
| <b>Rnase6</b>        | 45 | 0  | 0.750036 | 18   | 0.3       | 10.298   | 2.044875 | Stalled      | chr14:51746742-51750794   | 2.053   |
| <b>Ssbp4</b>         | 45 | 0  | 0.750036 | 349  | 5.816667  | 24.0642  | 5.257159 | Stalled      | chr8:73121389-73134213    | 10.825  |
| <b>Atoh8</b>         | 45 | 0  | 0.750036 | 108  | 1.8       | 2.59158  | 8.120461 | Stalled      | chr6:72156171-72187571    | 29.401  |
| <b>Rpph1</b>         | 44 | 0  | 0.733368 | 0    | 0         | 9.39827  | 68       | Unclassified | chr14:51425121-51427446   | 0.326   |
| <b>Gzmm</b>          | 44 | 0  | 0.733368 | 110  | 1.833333  | 0.189355 | 6.504625 | Stalled      | chr10:79149764-79158005   | 6.242   |
| <b>Igfbp4</b>        | 44 | 0  | 0.733368 | 23   | 0.383333  | 1.09801  | 5.599221 | Stalled      | chr11:98900573-98913957   | 11.385  |
| <b>Hnrnpa0</b>       | 43 | 0  | 0.716701 | 91   | 1.516667  | 139.293  | 9.451175 | Stalled      | chr13:58227240-58231917   | 2.678   |
| <b>1500031L02Rik</b> | 43 | 0  | 0.716701 | 45   | 0.75      | 8.61768  | 16.51981 | Stalled      | chr16:32097887-32108140   | 8.254   |
| <b>Dars2</b>         | 43 | 0  | 0.716701 | 403  | 6.716667  | 6.62658  | 9.673196 | Stalled      | chr1:162970743-163002763  | 30.021  |
| <b>Cry2</b>          | 43 | 0  | 0.716701 | 628  | 10.46667  | 4.62615  | 14.85916 | Stalled      | chr2:92243803-92276226    | 30.424  |
| <b>1110034G24Rik</b> | 43 | 0  | 0.716701 | 194  | 3.233333  | 1.14214  | 1.648761 | Unclassified | chr2:132514018-132576790  | 60.773  |
| <b>I134</b>          | 43 | 0  | 0.716701 | 125  | 2.083333  | 0.05219  | 4.35983  | Unclassified | chr8:113265729-113331803  | 64.075  |
| <b>Ints1</b>         | 42 | 0  | 0.700034 | 561  | 9.35      | 18.5766  | 5.284987 | Stalled      | chr5:140227235-140253632  | 24.398  |
| <b>MI13</b>          | 42 | 0  | 0.700034 | 972  | 16.2      | 2.82135  | 33.57821 | Stalled      | chr5:24777611-25006601    | 226.991 |
| <b>Slc37a4</b>       | 41 | 0  | 0.683366 | 147  | 2.45      | 3.99481  | 0.603378 | Stalled      | chr9:44204258-44211048    | 4.791   |
| <b>Tmem38a</b>       | 41 | 0  | 0.683366 | 59   | 0.983333  | 1.46735  | 7.170668 | Stalled      | chr8:75094001-75111183    | 15.183  |
| <b>Zfp384</b>        | 41 | 0  | 0.683366 | 517  | 8.616667  | 8.50609  | 9.601295 | Stalled      | chr6:124957822-124987887  | 28.066  |
| <b>Fgf18</b>         | 41 | 0  | 0.683366 | 70   | 1.166667  | 0.203238 | 7.610775 | Stalled      | chr11:33017430-33049400   | 29.971  |
| <b>Zmynd10</b>       | 40 | 0  | 0.666699 | 64   | 1.066667  | 0.606617 | 0.988524 | Elongating   | chr9:107447640-107453650  | 4.011   |
| <b>Cnn2</b>          | 40 | 0  | 0.666699 | 169  | 2.816667  | 117.296  | 5.144735 | Stalled      | chr10:79449344-79458145   | 6.802   |
| <b>Ng23</b>          | 39 | 0  | 0.650031 | 8    | 0.133333  | 3.61439  | 2.072558 | Stalled      | chr17:35162921-35166961   | 2.041   |
| <b>6530418L21Rik</b> | 39 | 0  | 0.650031 | 103  | 1.716667  | 1.99422  | 4.512195 | Stalled      | chr3:105505516-105523759  | 16.244  |
| <b>S100a5</b>        | 38 | 0  | 0.633364 | 13   | 0.216667  | 0.237339 | 1.332896 | Unclassified | chr3:90410443-90415702    | 3.26    |
| <b>Emilin1</b>       | 38 | 0  | 0.633364 | 56   | 0.933333  | 1.03216  | 0.311527 | Unclassified | chr5:31214158-31223646    | 7.489   |
| <b>Ubpap2l</b>       | 38 | 0  | 0.633364 | 749  | 12.483333 | 36.034   | 19.88994 | Stalled      | chr3:89803510-89858397    | 52.888  |
| <b>Tir6</b>          | 37 | 0  | 0.616696 | 24   | 0.4       | 2.22381  | 4.166895 | Stalled      | chr5:65344333-65353273    | 6.941   |
| <b>Kctd17</b>        | 37 | 0  | 0.616696 | 87   | 1.45      | 5.55998  | 1.101058 | Stalled      | chr15:78257057-78269733   | 10.677  |
| <b>Ppp1r13l</b>      | 37 | 0  | 0.616696 | 55   | 0.916667  | 0.724757 | 2.974621 | Unclassified | chr7:19944564-19963882    | 17.319  |
| <b>Gm5774</b>        | 35 | 0  | 0.583361 | 0    | 0         | 33.246   | 108      | Unclassified | chr7:106631294-106633442  | 0.149   |
| <b>Tmc4</b>          | 35 | 0  | 0.583361 | 115  | 1.916667  | 0        | 2.489877 | Elongating   | chr7:3617355-3631155      | 11.801  |
| <b>Snf8</b>          | 35 | 0  | 0.583361 | 334  | 5.566667  | 45.8709  | 6.21908  | Stalled      | chr11:95894230-95908719   | 12.49   |
| <b>Ankrd13b</b>      | 35 | 0  | 0.583361 | 63   | 1.05      | 1.2869   | 2.912924 | Unclassified | chr11:77283988-77305180   | 19.193  |
| <b>Ccdc96</b>        | 34 | 0  | 0.566694 | 30   | 0.5       | 2.03085  | 6.346478 | Stalled      | chr5:36825236-36830820    | 3.585   |
| <b>Faim3</b>         | 34 | 0  | 0.566694 | 83   | 1.383333  | 6.90147  | 4.62279  | Stalled      | chr1:132760353-132777367  | 15.015  |
| <b>BC055111</b>      | 34 | 0  | 0.566694 | 75   | 1.25      | 0.078069 | 0.252474 | Unclassified | chr4:106263513-106291843  | 26.331  |
| <b>Cramp1l</b>       | 34 | 0  | 0.566694 | 765  | 12.75     | 3.4147   | 6.479904 | Stalled      | chr17:25098170-25154175   | 54.006  |
| <b>Ino80b</b>        | 33 | 0  | 0.550026 | 58   | 0.966667  | 22.0098  | 2.671279 | Stalled      | chr6:83071821-83077023    | 3.203   |
| <b>Aanat</b>         | 33 | 0  | 0.550026 | 54   | 0.9       | 0.063187 | 0.682914 | Stalled      | chr11:116453000-116458993 | 3.994   |
| <b>Mcoln1</b>        | 33 | 0  | 0.550026 | 80   | 1.333333  | 6.18979  | 26.48733 | Stalled      | chr8:3498518-3515231      | 14.714  |
| <b>Acvrl1</b>        | 33 | 0  | 0.550026 | 75   | 1.25      | 0.787934 | 0.522054 | Unclassified | chr15:100956967-100975767 | 16.801  |
| <b>Rln3</b>          | 32 | 0  | 0.533359 | 4    | 0.066667  | 0.404726 | 0.371998 | Unclassified | chr8:86566965-86570878    | 1.914   |
| <b>Oscar</b>         | 32 | 0  | 0.533359 | 11   | 0.183333  | 0.098533 | 0        | Unclassified | chr7:3561416-3569735      | 6.32    |
| <b>Adamts15</b>      | 32 | 0  | 0.533359 | 29   | 0.483333  | 1.02519  | 1.695623 | Unclassified | chr10:79803460-79813191   | 7.732   |
| <b>Neur13</b>        | 32 | 0  | 0.533359 | 231  | 3.85      | 17.7781  | 2.948812 | Stalled      | chr1:36321446-36332270    | 8.825   |
| <b>Ppp3ca</b>        | 31 | 0  | 0.516691 | 1607 | 26.78333  | 9.49071  | 9.595212 | Stalled      | chr3:136331733-136598743  | 265.011 |
| <b>Tigd5</b>         | 30 | 0  | 0.500024 | 62   | 1.033333  | 1.01181  | 10.62877 | Stalled      | chr15:75738164-75744964   | 4.801   |
| <b>4933400C05Rik</b> | 30 | 0  | 0.500024 | 16   | 0.266667  | 0.149831 | 27.58229 | Stalled      | chr11:103069440-103081746 | 10.307  |
| <b>Nxf1</b>          | 30 | 0  | 0.500024 | 230  | 3.833333  | 31.9292  | 21.15411 | Stalled      | chr19:8829592-8845400     | 13.809  |
| <b>Sec14l2</b>       | 30 | 0  | 0.500024 | 122  | 2.033333  | 1.67766  | 0.725028 | Unclassified | chr11:3997042-4020732     | 21.691  |
| <b>1700001P01Rik</b> | 29 | 0  | 0.483356 | 35   | 0.583333  | 0.102695 | 21.82981 | Stalled      | chr11:97632794-97639232   | 4.439   |
| <b>Scarf1</b>        | 29 | 0  | 0.483356 | 56   | 0.933333  | 0.182202 | 2.654502 | Unclassified | chr11:75325042-75340082   | 13.041  |
| <b>Tekt2</b>         | 28 | 0  | 0.466689 | 5    | 0.083333  | 0.145835 | 0.587571 | Unclassified | chr4:125999364-126004443  | 3.08    |
| <b>Madcam1</b>       | 28 | 0  | 0.466689 | 14   | 0.233333  | 0.71252  | 2.096675 | Unclassified | chr10:79125318-79131281   | 3.964   |

|                      |    |    |          |      |          |          |          |              |                           |         |
|----------------------|----|----|----------|------|----------|----------|----------|--------------|---------------------------|---------|
| <b>Ccdc9</b>         | 28 | 0  | 0.466689 | 488  | 8.133333 | 22.3792  | 6.185133 | Stalled      | chr7:16859392-16874144    | 12.753  |
| <b>Ii12rb1</b>       | 28 | 0  | 0.466689 | 214  | 3.566667 | 6.59832  | 2.384855 | Elongating   | chr8:73330347-73345322    | 12.976  |
| <b>1600016N20Rik</b> | 27 | 0  | 0.450022 | 14   | 0.233333 | 1.96819  | 1.070133 | Unclassified | chr7:148395941-148401979  | 4.039   |
| <b>Zscan2</b>        | 26 | 0  | 0.433354 | 121  | 2.016667 | 0.975054 | 0.299248 | Stalled      | chr7:88004993-88021399    | 14.407  |
| <b>P2rx3</b>         | 26 | 0  | 0.433354 | 187  | 3.116667 | 0.553471 | 4.928162 | Stalled      | chr2:84836708-84877991    | 39.284  |
| <b>Tmem88</b>        | 25 | 0  | 0.416687 | 63   | 1.05     | 0.795382 | 1.412429 | Unclassified | chr11:69210017-69213736   | 1.72    |
| <b>Cidnd2</b>        | 24 | 0  | 0.400019 | 17   | 0.283333 | 0.249669 | 0.162758 | Unclassified | chr7:50694185-50698690    | 2.506   |
| <b>Cenpc1</b>        | 24 | 0  | 0.400019 | 296  | 4.933333 | 6.97924  | 26.53936 | Stalled      | chr5:86441049-86496608    | 53.56   |
| <b>Aspdh</b>         | 23 | 0  | 0.383352 | 16   | 0.266667 | 0.225546 | 0.076106 | Unclassified | chr7:51718804-51723121    | 2.318   |
| <b>Aldoc</b>         | 23 | 0  | 0.383352 | 14   | 0.233333 | 36.4263  | 1.306348 | Unclassified | chr11:78135699-78140262   | 2.564   |
| <b>Cisd3</b>         | 23 | 0  | 0.383352 | 31   | 0.516667 | 11.6586  | 8.099464 | Stalled      | chr11:97545265-97549939   | 2.675   |
| <b>Zbtb22</b>        | 23 | 0  | 0.383352 | 121  | 2.016667 | 13.9401  | 3.336075 | Stalled      | chr17:34051120-34056270   | 3.151   |
| <b>Zfp238</b>        | 23 | 0  | 0.383352 | 239  | 3.983333 | 10.5622  | 1.799219 | Elongating   | chr1:179372791-179380897  | 6.107   |
| <b>Cyb5r2</b>        | 23 | 0  | 0.383352 | 18   | 0.3      | 0.100128 | 1.931131 | Unclassified | chr7:114891968-114903510  | 9.543   |
| <b>Hist1h3i</b>      | 22 | 0  | 0.366684 | 0    | 0        | 0        | 231      | Unclassified | chr13:21874783-21877266   | 0.484   |
| <b>Fam134a</b>       | 22 | 0  | 0.366684 | 50   | 0.833333 | 16.7489  | 18.21478 | Stalled      | chr1:75137359-75144483    | 5.125   |
| <b>Ufc1</b>          | 22 | 0  | 0.366684 | 72   | 1.2      | 35.3629  | 11.69129 | Stalled      | chr1:173218694-173227113  | 6.42    |
| <b>Atp9b</b>         | 22 | 0  | 0.366684 | 1310 | 21.83333 | 10.4682  | 25.60154 | Stalled      | chr18:80931815-81132797   | 198.983 |
| <b>Gm15698</b>       | 21 | 1  | 0.350017 | 2    | 0.033333 | 0.06041  | 0.769988 | Unclassified | chr11:88825980-88830231   | 2.252   |
| <b>Nudt22</b>        | 21 | 0  | 0.350017 | 33   | 0.55     | 8.24126  | 2.941748 | Stalled      | chr19:7067508-7072527     | 3.02    |
| <b>Scn4b</b>         | 21 | 0  | 0.350017 | 30   | 0.5      | 0.096636 | 0.637014 | Unclassified | chr9:44945124-44962144    | 15.021  |
| <b>Mrps18a</b>       | 21 | 0  | 0.350017 | 365  | 6.083333 | 27.8388  | 11.5538  | Stalled      | chr17:46245952-46265857   | 17.906  |
| <b>Sec23a</b>        | 21 | 0  | 0.350017 | 188  | 3.133333 | 3.33468  | 36.74727 | Stalled      | chr12:60059370-60115004   | 53.635  |
| <b>Ffar1</b>         | 20 | 0  | 0.333349 | 0    | 0        | 11.8078  | 57       | Unclassified | chr7:31645586-31648489    | 0.904   |
| <b>Grifin</b>        | 20 | 0  | 0.333349 | 2    | 0.033333 | 0.214002 | 0.916667 | Unclassified | chr5:141039142-141043021  | 1.88    |
| <b>Pfdn5</b>         | 20 | 0  | 0.333349 | 66   | 1.1      | 67.3217  | 7.646536 | Stalled      | chr15:102154546-102161920 | 5.375   |
| <b>Eps8l1</b>        | 20 | 0  | 0.333349 | 86   | 1.433333 | 2.67103  | 0.94987  | Unclassified | chr7:4414343-4430844      | 14.502  |
| <b>Degs2</b>         | 19 | 0  | 0.316682 | 49   | 0.816667 | 0.071543 | 0.553507 | Unclassified | chr12:109928431-109942516 | 12.086  |
| <b>Hgs</b>           | 19 | 0  | 0.316682 | 292  | 4.866667 | 13.5552  | 16.03272 | Stalled      | chr11:120326948-120345298 | 16.351  |
| <b>Traip</b>         | 19 | 0  | 0.316682 | 359  | 5.983333 | 7.85741  | 6.370916 | Stalled      | chr9:107851293-107874599  | 21.307  |
| <b>Chaf1b</b>        | 19 | 0  | 0.316682 | 268  | 4.466667 | 12.7063  | 10.7059  | Stalled      | chr16:93882145-93906351   | 22.207  |
| <b>B3gnt1</b>        | 18 | 0  | 0.300014 | 14   | 0.233333 | 9.11698  | 9.754409 | Stalled      | chr19:5036825-5041134     | 2.31    |
| <b>38777</b>         | 18 | 0  | 0.300014 | 193  | 3.216667 | 3.71881  | 14.63318 | Stalled      | chr17:33822656-33857615   | 32.96   |
| <b>Ii18bp</b>        | 17 | 0  | 0.283347 | 67   | 1.116667 | 0.850156 | 0.81297  | Elongating   | chr7:109163590-109168669  | 3.08    |
| <b>Tmem69</b>        | 17 | 44 | 0.283347 | 55   | 0.916667 | 2.01056  | 5.205899 | Stalled      | chr4:116224132-116230548  | 4.417   |
| <b>Gapdh</b>         | 17 | 0  | 0.283347 | 118  | 1.966667 | 2.94013  | 0.267919 | Stalled      | chr7:31514905-31526375    | 9.471   |
| <b>Secm1a</b>        | 17 | 0  | 0.283347 | 11   | 0.183333 | 0.039679 | 1.073216 | Unclassified | chr11:120928716-120944453 | 13.738  |
| <b>Chchd6</b>        | 17 | 0  | 0.283347 | 449  | 7.483333 | 6.7373   | 12.80881 | Stalled      | chr6:89333139-89547646    | 212.508 |
| <b>Slc4a2</b>        | 16 | 0  | 0.266679 | 221  | 3.683333 | 8.95138  | 6.805419 | Stalled      | chr5:23929049-23946765    | 15.717  |
| <b>Eif6</b>          | 15 | 0  | 0.250012 | 242  | 4.033333 | 83.5801  | 5.719578 | Stalled      | chr2:155645572-155654661  | 7.09    |
| <b>Kif23</b>         | 15 | 0  | 0.250012 | 302  | 5.033333 | 11.7531  | 16.82675 | Stalled      | chr9:61765086-61796606    | 29.521  |
| <b>Slc9a3</b>        | 15 | 0  | 0.250012 | 64   | 1.066667 | 0.066913 | 3.644401 | Unclassified | chr13:74256962-74303512   | 44.551  |
| <b>H2-Ea</b>         | 14 | 85 | 0.233345 | 60   | 1        | 1.20989  | 0.186864 | Stalled      | chr17:34479156-34483590   | 2.435   |
| <b>Slc25a34</b>      | 14 | 0  | 0.233345 | 41   | 0.683333 | 0.656925 | 4.722912 | Stalled      | chr4:141174739-141181749  | 5.011   |
| <b>Tbx10</b>         | 14 | 0  | 0.233345 | 38   | 0.633333 | 0.064875 | 0.395    | Unclassified | chr19:3990751-3999512     | 6.762   |
| <b>Sec16a</b>        | 14 | 0  | 0.233345 | 616  | 10.26667 | 9.69368  | 13.04271 | Stalled      | chr2:26264950-26302736    | 35.787  |
| <b>Rnu73b</b>        | 13 | 0  | 0.216677 | 0    | 0        | 0        | 77       | Unclassified | chr3:85944538-85946609    | 0.072   |
| <b>Eif3g</b>         | 13 | 0  | 0.216677 | 294  | 4.9      | 97.4645  | 2.422079 | Stalled      | chr9:20698792-20705034    | 4.243   |
| <b>Klhdc3</b>        | 12 | 0  | 0.20001  | 163  | 2.716667 | 31.3742  | 7.187803 | Stalled      | chr17:46811501-46819879   | 6.379   |
| <b>Hk3</b>           | 12 | 0  | 0.20001  | 88   | 1.466667 | 0.248876 | 0.420616 | Unclassified | chr13:55107346-55124695   | 15.35   |
| <b>Gh</b>            | 11 | 0  | 0.183342 | 5    | 0.083333 | 8.74771  | 1.079365 | Unclassified | chr11:106161581-106165124 | 1.544   |
| <b>Jsrp1</b>         | 11 | 0  | 0.183342 | 31   | 0.516667 | 0.328872 | 0.570922 | Unclassified | chr10:80271245-80278240   | 4.996   |
| <b>Hsd17b14</b>      | 11 | 0  | 0.183342 | 13   | 0.216667 | 0.122805 | 1.445521 | Unclassified | chr7:52815566-52822691    | 5.126   |
| <b>Rpl3l</b>         | 10 | 0  | 0.166675 | 21   | 0.35     | 0.172614 | 0.420353 | Unclassified | chr17:24867629-24873094   | 3.466   |
| <b>Fhl3</b>          | 10 | 0  | 0.166675 | 259  | 4.316667 | 12.491   | 4.984434 | Stalled      | chr4:124375953-124385855  | 7.903   |
| <b>Ndufab1</b>       | 10 | 0  | 0.166675 | 316  | 5.266667 | 15.4164  | 5.141001 | Stalled      | chr7:129231557-129247362  | 13.806  |
| <b>Atp6v0c</b>       | 9  | 0  | 0.150007 | 218  | 3.633333 | 44.1652  | 6.062968 | Stalled      | chr17:24300832-24308374   | 5.543   |
| <b>Fam46a</b>        | 9  | 0  | 0.150007 | 18   | 0.3      | 1.74034  | 29.87045 | Stalled      | chr9:85214046-85222757    | 6.712   |
| <b>Xpa</b>           | 9  | 0  | 0.150007 | 353  | 5.883333 | 17.9932  | 11.52393 | Stalled      | chr4:46188093-46211183    | 21.091  |
| <b>Cyhr1</b>         | 8  | 0  | 0.13334  | 213  | 3.55     | 14.7485  | 2.358014 | Elongating   | chr15:76476196-76492538   | 14.343  |
| <b>Leprel2</b>       | 8  | 0  | 0.13334  | 31   | 0.516667 | 0.444739 | 2.677426 | Unclassified | chr6:124791112-124809705  | 16.594  |
| <b>Hist1h2bk</b>     | 7  | 0  | 0.116672 | 0    | 0        | 0        | 262      | Unclassified | chr13:22125755-22128136   | 0.382   |
| <b>Hist1h2ai</b>     | 7  | 0  | 0.116672 | 0    | 0        | 0        | 262      | Unclassified | chr13:21806290-21808683   | 0.394   |
| <b>Rpl36</b>         | 7  | 0  | 0.116672 | 0    | 0        | 143.478  | 380      | Unclassified | chr17:56750817-56753669   | 0.853   |
| <b>Trim56</b>        | 7  | 0  | 0.116672 | 212  | 3.533333 | 8.86704  | 2.289233 | Elongating   | chr5:137587155-137594077  | 4.923   |
| <b>Sec1</b>          | 6  | 0  | 0.100005 | 3    | 0.05     | 0.236109 | 3.831913 | Unclassified | chr7:52933056-52936928    | 1.873   |
| <b>Gal</b>           | 6  | 0  | 0.100005 | 7    | 0.116667 | 0.366705 | 1.007968 | Unclassified | chr19:3409916-3416457     | 4.542   |
| <b>170001O22Rik</b>  | 6  | 0  | 0.100005 | 13   | 0.216667 | 1.17011  | 2.832727 | Unclassified | chr2:30651090-30659227    | 6.138   |
| <b>Slc4a3</b>        | 6  | 0  | 0.100005 | 32   | 0.533333 | 0.178846 | 1.377386 | Unclassified | chr1:75540840-75556006    | 13.167  |
| <b>Olfir523</b>      | 5  | 0  | 0.083337 | 0    | 0        | 0.080606 | 0        | Unclassified | chr7:147360002-147362956  | 0.955   |
| <b>Slc39a7</b>       | 5  | 0  | 0.083337 | 167  | 2.783333 | 78.0435  | 6.830132 | Stalled      | chr17:34165210-34170635   | 3.426   |
| <b>2310036O22Rik</b> | 5  | 0  | 0.083337 | 109  | 1.816667 | 112.295  | 7.577228 | Stalled      | chr8:87548731-87554185    | 3.455   |
| <b>Spata24</b>       | 5  | 0  | 0.083337 | 81   | 1.35     | 23.3053  | 4.735845 | Stalled      | chr18:35816342-35823840   | 5.499   |
| <b>Rela</b>          | 5  | 0  | 0.083337 | 422  | 7.033333 | 26.1021  | 10.90092 | Stalled      | chr19:5635489-5648130     | 10.642  |
| <b>Pitx3</b>         | 5  | 0  | 0.083337 | 40   | 0.666667 | 2.59843  | 0.450843 | Unclassified | chr19:46210175-46224815   | 12.641  |
| <b>Kif16b</b>        | 5  | 0  | 0.083337 | 884  | 14.73333 | 2.65003  | 22.98346 | Stalled      | chr2:142444080-142729200  | 283.121 |
| <b>Muc1</b>          | 4  | 0  | 0.06667  | 122  | 2.033333 | 0.665028 | 0.715079 | Stalled      | chr3:89030973-89037291    | 4.319   |
| <b>Samd10</b>        | 2  | 0  | 0.033335 | 35   | 0.583333 | 3.45692  | 4.789349 | Stalled      | chr2:181329923-181335852  | 3.93    |
| <b>Birc2</b>         | 2  | 0  | 0.033335 | 327  | 5.45     | 38.3439  | 0.2804   | Stalled      | chr9:7818225-7837255      | 17.031  |
| <b>Mmp28</b>         | 2  | 0  | 0.033335 | 36   | 0.6      | 0.654906 | 1.7907   | Unclassified | chr11:83255377-83278463   | 21.087  |
| <b>Dock3</b>         | 2  | 0  | 0.033335 | 355  | 5.916667 | 0.486345 | 6.341375 | Unclassified | chr9:106795155-107136240  | 339.086 |
| <b>Doc2g</b>         | 1  | 0  | 0.016667 | 97   | 1.166667 | 3.28359  | 0.973821 | Elongating   | chr19:4001384-4007005     | 3.622   |
| <b>Tsku</b>          | 1  | 0  | 0.016667 | 24   | 0.4      | 0.244614 | 3.43367  | Unclassified | chr7:105499179-105511798  | 10.62   |
| <b>Fam65a</b>        | 1  | 0  | 0.016667 | 412  | 6.866667 | 4.75345  | 3.287938 | Stalled      | chr8:108127128-108146118  | 16.991  |
| <b>Mapk8ip1</b>      | 1  | 0  | 0.016667 | 162  | 2.7      | 0.743609 | 0.83582  | Stalled      | chr2:92223836-92243420    | 17.585  |
| <b>Vstm2l</b>        | 1  | 0  | 0.016667 | 42   | 0.7      | 0.272688 | 1.636067 | Unclassified | chr2:157738388-157770455  | 30.068  |



|           |   |          |   |      |          |          |          |              |                           |          |
|-----------|---|----------|---|------|----------|----------|----------|--------------|---------------------------|----------|
| Rnf38     | 0 | 0        | 0 | 535  | 8.916667 | 3.29263  | 51.87833 | Stalled      | chr4:44139083-44182410    | 41.328   |
| H2-Q6     | 0 | 0        | 0 | 413  | 6.883333 | 202.449  | 3.641012 | Unclassified | chr17:35559821-35565306   | 3.486    |
| Nipsnap3a | 0 | 0        | 0 | 9    | 0.15     | 0.069971 | 0.569244 | Unclassified | chr4:53000155-53013726    | 11.572   |
| Morn2     | 0 | 0        | 0 | 109  | 1.816667 | 2.77091  | 41.27987 | Stalled      | chr17:80687551-80696814   | 7.264    |
| Pram1     | 0 | 0        | 0 | 501  | 8.35     | 0.186481 | 0.459217 | Unclassified | chr17:33773000-33782645   | 7.646    |
| Cog3      | 0 | 0        | 0 | 769  | 12.81667 | 5.82465  | 15.79689 | Unclassified | chr14:76102157-76156300   | 52.144   |
| Als2cr11  | 0 | 0        | 0 | 40   | 0.666667 | 0        | 1.066293 | Unclassified | chr1:59107349-59153744    | 44.396   |
| Svopl     | 0 | 0        | 0 | 110  | 1.833333 | 0.150072 | 0.731345 | Unclassified | chr6:37933738-37998996    | 63.259   |
| Ms4a13    | 0 | 0        | 0 | 31   | 0.516667 | 0.055926 | 1.453238 | Unclassified | chr19:11243907-11273213   | 27.307   |
| Adora2b   | 0 | 0        | 0 | 66   | 1.1      | 1.40376  | 2.645976 | Unclassified | chr11:62060485-62079954   | 17.47    |
| Yrdc      | 0 | 0        | 0 | 669  | 11.15    | 13.1357  | 11.43942 | Unclassified | chr4:124526002-124532485  | 4.484    |
| Gbx2      | 0 | 0        | 0 | 7    | 0.116667 | 0.18688  | 0.849693 | Unclassified | chr1:91824536-91829751    | 3.216    |
| Olfr1288  | 0 | 0        | 0 | 0    | 0        | 0        | 0        | Unclassified | chr2:111316942-111319881  | 0.94     |
| Adra1b    | 0 | 0        | 0 | 64   | 1.066667 | 0.193369 | 1.496648 | Unclassified | chr11:43588107-43651834   | 61.728   |
| Adra1a    | 0 | 0        | 0 | 100  | 1.666667 | 0.049568 | 1.524124 | Unclassified | chr14:67252094-67352166   | 98.073   |
| Olfr1277  | 0 | 0        | 0 | 0    | 0        | 0        | 0        | Unclassified | chr2:111109610-111112522  | 0.913    |
| Olfr1276  | 0 | 0        | 0 | 1    | 0.016667 | 0        | 1        | Unclassified | chr2:111095273-111098212  | 0.94     |
| Olfr1325  | 0 | 0        | 0 | 0    | 0        | 0        | 0        | Unclassified | chrX:71837666-71840614    | 0.949    |
| Olfr190   | 0 | 0        | 0 | 1    | 0.016667 | 0.023642 | 0        | Unclassified | chr16:59073980-59076904   | 0.925    |
| Pcyt1b    | 0 | 0        | 0 | 91   | 1.516667 | 0.62833  | 1.033429 | Unclassified | chrX:90898201-90995287    | 95.087   |
| Defb8     | 0 | 0        | 0 | 1    | 0.016667 | 0        | 0        | Unclassified | chr8:19445769-19449606    | 1.838    |
| Olfr39    | 0 | 0        | 0 | 1    | 0.016667 | 0        | 0        | Unclassified | chr9:20084794-20091092    | 4.299    |
| Awat1     | 0 | 0        | 0 | 3    | 0.05     | 0.055124 | 2        | Unclassified | chrX:97765585-97773545    | 5.961    |
| Awat2     | 0 | 0        | 0 | 7    | 0.116667 | 0.096545 | 0.651374 | Unclassified | chrX:97597560-97609901    | 10.342   |
| Nlgn3     | 0 | 0        | 0 | 79   | 1.316667 | 0.175113 | 11.84922 | Stalled      | chrX:98492519-98516687    | 22.169   |
| Dync21i1  | 0 | 0        | 0 | 57   | 0.95     | 0.888279 | 6.095603 | Unclassified | chr17:85023838-85054904   | 29.067   |
| Rest      | 0 | 0        | 0 | 516  | 8.6      | 3.23842  | 5.424924 | Unclassified | chr5:77692518-77712722    | 18.205   |
| Tet2      | 0 | 0        | 0 | 837  | 13.95    | 2.67782  | 17.317   | Unclassified | chr3:133126640-133209354  | 80.715   |
| Upk1b     | 0 | 0        | 0 | 42   | 0.7      | 0        | 0.800388 | Unclassified | chr16:38773296-38802316   | 27.021   |
| Cd244     | 0 | 0        | 0 | 60   | 1        | 0.361393 | 0.302256 | Unclassified | chr1:173487323-173515447  | 26.125   |
| Slc2a10   | 0 | 0        | 0 | 23   | 0.383333 | 0.04595  | 1.760424 | Unclassified | chr2:165327477-165345411  | 15.935   |
| Wdr17     | 0 | 0        | 0 | 41   | 0.683333 | 0.021712 | 0        | Unclassified | chr8:55714995-55806032    | 89.038   |
| Adam29    | 0 | 0        | 0 | 9    | 0.15     | 0.028209 | 0.814187 | Unclassified | chr8:58349708-58387761    | 36.054   |
| Klrc1     | 0 | 0        | 0 | 1    | 0.016667 | 0.020908 | 1        | Unclassified | chr6:129624876-129630928  | 4.053    |
| Camk1g    | 0 | 0        | 0 | 77   | 1.283333 | 0.088821 | 0.724831 | Unclassified | chr1:195172539-195198476  | 23.938   |
| Kif19a    | 0 | 0        | 0 | 105  | 1.75     | 1.5716   | 4.738851 | Unclassified | chr11:114624702-114651889 | 25.188   |
| Als2      | 0 | 0        | 0 | 401  | 6.683333 | 2.90172  | 25.69654 | Stalled      | chr1:59219599-59295937    | 74.339   |
| Gm428     | 0 | 0        | 0 | 0    | 0        | 0        | 0        | Unclassified | chr4:73327417-73333463    | 4.047    |
| Slc25a27  | 0 | 0        | 0 | 43   | 0.716667 | 0.58668  | 3.377909 | Unclassified | chr17:43778848-43805964   | 25.117   |
| Pri3c1    | 0 | 0        | 0 | 1    | 0.016667 | 0        | 0        | Unclassified | chr13:27286528-27295616   | 7.089    |
| Tcl1b3    | 0 | 0        | 0 | 4    | 0.066667 | 0.029495 | 0.528005 | Unclassified | chr12:106427254-106433609 | 4.356    |
| Tcl1b1    | 0 | 0        | 0 | 3    | 0.05     | 0.03526  | 0        | Unclassified | chr12:106395913-106404835 | 6.923    |
| Adam39    | 0 | 0        | 0 | 0    | 0        | 0.022082 | 0        | Unclassified | chr8:41906362-41912215    | 3.854    |
| Chrna10   | 0 | 0        | 0 | 53   | 0.883333 | 0.0459   | 4.926569 | Unclassified | chr7:109259779-109267227  | 5.449    |
| Cyp26b1   | 0 | 0        | 0 | 37   | 0.616667 | 0.101741 | 0        | Unclassified | chr6:84521937-84545740    | 21.804   |
| Dyrk1b    | 0 | 0        | 0 | 564  | 9.4      | 2.25602  | 7.113288 | Unclassified | chr7:28962501-28972313    | 7.813    |
| Zdhhc7    | 0 | 0        | 0 | 517  | 8.616667 | 13.0782  | 11.29631 | Unclassified | chr8:122604994-122627372  | 20.379   |
| Epha10    | 0 | 0        | 0 | 16   | 0.266667 | 0.093323 | 0.635394 | Unclassified | chr4:124557028-124563752  | 4.725    |
| Olfr1295  | 0 | 0        | 0 | 1    | 0.016667 | 0        | 0        | Unclassified | chr2:111404660-111407599  | 0.94     |
| Ifit3     | 0 | 65.86076 | 0 | 10   | 0.166667 | 0.730248 | 1.884717 | Unclassified | chr19:34656018-34663472   | 5.455    |
| Fev       | 0 | 0        | 0 | 13   | 0.216667 | 0.337956 | 2.101869 | Unclassified | chr1:74928082-74933982    | 3.901    |
| Adprh     | 0 | 0        | 0 | 544  | 9.066667 | 73.8693  | 19.54037 | Unclassified | chr16:38445478-38454769   | 7.292    |
| Psmc8     | 0 | 0        | 0 | 674  | 11.23333 | 82.755   | 3.750858 | Unclassified | chr7:29959205-29967692    | 6.488    |
| Clec7a    | 0 | 0        | 0 | 6    | 0.1      | 0.073172 | 0        | Unclassified | chr6:129411608-129424795  | 11.188   |
| Npy5r     | 0 | 0        | 0 | 9    | 0.15     | 0        | 1.175666 | Unclassified | chr8:69203863-69213993    | 8.131    |
| Prrt1     | 0 | 0        | 0 | 16   | 0.266667 | 0.473133 | 0.183769 | Unclassified | chr17:34764630-34769205   | 2.576    |
| Trim61    | 0 | 0        | 0 | 8    | 0.133333 | 0        | 0.395405 | Unclassified | chr8:67536888-67544465    | 5.578    |
| Trnc6a    | 0 | 0        | 0 | 1175 | 19.58333 | 11.3293  | 15.53932 | Unclassified | chr7:130265398-130338810  | 71.413   |
| Ktn1      | 0 | 0        | 0 | 586  | 9.766667 | 8.33007  | 1.798594 | Unclassified | chr14:48281430-48356239   | 72.81    |
| Slc5a11   | 0 | 0        | 0 | 100  | 1.666667 | 0.076646 | 1.122396 | Unclassified | chr7:130356379-130416765  | 58.387   |
| Krtap9-1  | 0 | 0        | 0 | 1    | 0.016667 | 0.030199 | 1        | Unclassified | chr11:99732702-99735313   | 0.612    |
| Krtap8-2  | 0 | 0        | 0 | 2    | 0.033333 | 0        | 1        | Unclassified | chr16:88896212-88898694   | 0.483    |
| Krtap6-1  | 0 | 0        | 0 | 0    | 0        | 0        | 0        | Unclassified | chr16:89029943-89032537   | 0.595    |
| Usp32     | 0 | 0        | 0 | 630  | 10.5     | 2.29956  | 55.66258 | Stalled      | chr11:84797989-84955457   | 155.469  |
| Dnalc1    | 0 | 0        | 0 | 101  | 1.683333 | 0.2671   | 3.802346 | Unclassified | chr12:85453277-85484460   | 29.184   |
| Olfr618   | 0 | 0        | 0 | 0    | 0        | 0.026812 | 0        | Unclassified | chr7:110743831-110746787  | 0.957    |
| Fam84a    | 0 | 0        | 0 | 5    | 0.083333 | 0.060669 | 0.534306 | Unclassified | chr12:14154403-14160844   | 4.442    |
| Olfr1351  | 0 | 0        | 0 | 3    | 0.05     | 0.02001  | 0        | Unclassified | chr10:78478068-78481028   | 0.961    |
| Bag1      | 0 | 0        | 0 | 368  | 6.133333 | 64.9255  | 23.41682 | Unclassified | chr4:40883430-40897314    | 11.885   |
| Olfr1414  | 0 | 0        | 0 | 2    | 0.033333 | 0.053724 | 1        | Unclassified | chr1:94407664-94410603    | 0.94     |
| Olfr679   | 0 | 0        | 0 | 0    | 0        | 0.020231 | 0        | Unclassified | chr7:112232231-112235179  | 0.949    |
| Olfr1353  | 0 | 0        | 0 | 1    | 0.016667 | 0        | 0        | Unclassified | chr10:78430395-78433325   | 0.931    |
| Olfr669   | 0 | 0        | 0 | 2    | 0.033333 | 0.026869 | 1        | Unclassified | chr7:112085041-112087995  | 0.955    |
| Rbm24     | 0 | 0        | 0 | 15   | 0.25     | 0.512812 | 0        | Unclassified | chr13:46511668-46526468   | 12.801   |
| Mapkbp1   | 0 | 0        | 0 | 411  | 6.85     | 3.21819  | 17.50383 | Unclassified | chr2:119796434-119853138  | 54.705   |
| Ifi203    | 0 | 0        | 0 | 130  | 2.166667 | 9.65576  | 3.569244 | Unclassified | chr1:175850533-175874623  | 22.091   |
| Slc46a1   | 0 | 0        | 0 | 97   | 1.616667 | 2.87081  | 22.20267 | Stalled      | chr11:78277202-78285446   | 6.245    |
| Mecp2     | 0 | 0        | 0 | 683  | 11.38333 | 3.27768  | 19.8262  | Unclassified | chrX:71272160-71332932    | 58.773   |
| Gm6460    | 0 | 0        | 0 | 0    | 0        | 0        | 0        | Unclassified | chr5:11592955-11599480    | 4.526    |
| Nrp1      | 0 | 0        | 0 | 139  | 2.316667 | 0.196954 | 1.578158 | Unclassified | chr8:130880972-131029373  | 146.402  |
| Gm10922   | 0 | 0        | 0 | 0    | 0        | 0        | 0        | Unclassified | chrX:3993613-3997573      | 1.961    |
| Hyal5     | 0 | 0        | 0 | 9    | 0.15     | 0        | 0        | Unclassified | chr6:24805996-24841958    | 33.963   |
| Map3k6    | 0 | 0        | 0 | 125  | 2.083333 | 0.632814 | 9.794396 | Unclassified | chr4:132794732-132808843  | 12.112   |
| Ldhc      | 0 | 0        | 0 | 37   | 0.616667 | 0.088051 | 0.636755 | Unclassified | chr7:54114632-54133512    | 16.881   |
| Nrg3      | 0 | 0        | 0 | 412  | 6.866667 | 0.060645 | 0.728794 | Unclassified | chr14:39183612-40288376   | 1102.765 |
| Prss1     | 0 | 0        | 0 | 0    | 0        | 0.022414 | 0        | Unclassified | chr6:41406928-41413785    | 4.858    |



|               |   |   |   |      |           |          |          |              |                           |         |
|---------------|---|---|---|------|-----------|----------|----------|--------------|---------------------------|---------|
| Efemp2        | 0 | 0 | 0 | 90   | 1.5       | 0.306679 | 0.286238 | Unclassified | chr19:5472689-5481854     | 7.166   |
| C330021F23Rik | 0 | 0 | 0 | 17   | 0.283333  | 34.1561  | 0.568035 | Unclassified | chr8:3565997-3584776      | 16.78   |
| Gpr85         | 0 | 0 | 0 | 10   | 0.166667  | 1.00735  | 0        | Unclassified | chr6:13785073-13791848    | 4.776   |
| Dip2a         | 0 | 0 | 0 | 340  | 5.666667  | 1.39917  | 24.3737  | Stalled      | chr10:75725793-75810007   | 82.215  |
| Slc5a4a       | 0 | 0 | 0 | 42   | 0.7       | 0.049878 | 0.498876 | Unclassified | chr10:75608195-75652010   | 41.816  |
| Zfp280b       | 0 | 0 | 0 | 1298 | 21.633333 | 25.256   | 4.1825   | Unclassified | chr10:75493356-75505714   | 10.359  |
| Slc5a4b       | 0 | 0 | 0 | 40   | 0.666667  | 0.039053 | 0        | Unclassified | chr10:75521365-75575763   | 52.399  |
| Slc35e1       | 0 | 0 | 0 | 816  | 13.6      | 8.19414  | 6.364693 | Unclassified | chr8:75001893-75018513    | 14.621  |
| Olfir959      | 0 | 0 | 0 | 1    | 0.016667  | 0        | 1        | Unclassified | chr9:39379906-39382842    | 0.937   |
| Sh3bgrl2      | 0 | 0 | 0 | 154  | 2.566667  | 0.582015 | 11.9746  | Stalled      | chr9:83439944-83493898    | 51.955  |
| BC066135      | 0 | 0 | 0 | 21   | 0.35      | 0        | 1.193731 | Unclassified | chr2:180012350-180026584  | 12.235  |
| Rhod1         | 0 | 0 | 0 | 379  | 6.316667  | 5.39679  | 2.924104 | Elongating   | chr8:107853061-107873870  | 18.81   |
| Tlr2          | 0 | 0 | 0 | 57   | 0.95      | 2.57611  | 5.881913 | Unclassified | chr3:83640193-83647530    | 5.338   |
| Gm16515       | 0 | 0 | 0 | 173  | 2.883333  | 3.71896  | 9.908769 | Unclassified | chr11:60715747-60729294   | 11.548  |
| Ssxb5         | 0 | 0 | 0 | 0    | 0         | 0.01062  | 0        | Unclassified | chrX:8378816-8386512      | 5.697   |
| Tlk2          | 0 | 0 | 0 | 1382 | 23.033333 | 3.90252  | 28.95426 | Unclassified | chr11:105040843-105145270 | 102.428 |
| AY026312      | 0 | 0 | 0 | 3    | 0.05      | 0        | 3        | Unclassified | chr16:88932048-88934509   | 0.462   |
| Nr1h2         | 0 | 0 | 0 | 225  | 3.75      | 22.7104  | 4.208989 | Unclassified | chr7:51805002-51811293    | 4.292   |
| Rpl39l        | 0 | 0 | 0 | 4    | 0.066667  | 0        | 0        | Unclassified | chr16:10168320-10175004   | 4.685   |
| Kif27         | 0 | 0 | 0 | 89   | 1.483333  | 0.014362 | 0        | Unclassified | chr13:58388876-58458223   | 67.348  |
| 4930578N16Rik | 0 | 0 | 0 | 264  | 4.4       | 1.31791  | 41.98058 | Stalled      | chr2:69596113-69629543    | 31.431  |
| Ptplad2       | 0 | 0 | 0 | 176  | 2.933333  | 0.036641 | 1.336806 | Unclassified | chr4:88058833-88086830    | 25.998  |
| Grid2ip       | 0 | 0 | 0 | 76   | 1.266667  | 0.202761 | 0.308514 | Unclassified | chr5:144117016-144153477  | 34.462  |
| Tmem215       | 0 | 0 | 0 | 5    | 0.083333  | 0.062507 | 0        | Unclassified | chr4:40417212-40422686    | 3.475   |
| Lmod3         | 0 | 0 | 0 | 27   | 0.45      | 0.100031 | 0.731174 | Unclassified | chr6:97188521-97204774    | 14.254  |
| Uox           | 0 | 0 | 0 | 36   | 0.6       | 0.076495 | 1.020448 | Unclassified | chr3:146258112-146294447  | 34.336  |
| Lmbrd2        | 0 | 0 | 0 | 296  | 4.933333  | 2.04898  | 34.38779 | Stalled      | chr15:9068325-9127206     | 56.882  |
| Cachd1        | 0 | 0 | 0 | 191  | 3.183333  | 0.139249 | 1.094587 | Unclassified | chr4:100447283-100676353  | 227.071 |
| Prap1         | 0 | 0 | 0 | 20   | 0.333333  | 0.20605  | 0.149343 | Unclassified | chr7:147277294-147283102  | 3.809   |
| Gyk1l         | 0 | 0 | 0 | 2    | 0.033333  | 0.03364  | 1        | Unclassified | chr18:52851343-52855247   | 1.905   |
| Gk2           | 0 | 0 | 0 | 2    | 0.033333  | 0.093425 | 0.459167 | Unclassified | chr5:97884179-97888027    | 1.849   |
| Gjb3          | 0 | 0 | 0 | 13   | 0.216667  | 0.054829 | 0.945346 | Unclassified | chr4:127002480-127010080  | 5.601   |
| Gjb4          | 0 | 0 | 0 | 4    | 0.066667  | 0        | 0        | Unclassified | chr4:127028329-127033325  | 2.997   |
| Gjb5          | 0 | 0 | 0 | 8    | 0.133333  | 0.015043 | 1.319955 | Unclassified | chr4:127032052-127037408  | 3.357   |
| Lrrc34        | 0 | 0 | 0 | 30   | 0.5       | 0.125377 | 0        | Unclassified | chr3:30523188-30548740    | 23.553  |
| 1700001F09Rik | 0 | 0 | 0 | 1    | 0.016667  | 0        | 0        | Unclassified | chr14:44020916-44028344   | 5.429   |
| 1700006A11Rik | 0 | 0 | 0 | 12   | 0.2       | 0.025852 | 0        | Unclassified | chr3:124104072-124130946  | 24.875  |
| Ostm1         | 0 | 0 | 0 | 362  | 6.033333  | 7.9379   | 20.31042 | Unclassified | chr10:42396722-42422261   | 23.54   |
| Gclc          | 0 | 0 | 0 | 782  | 13.033333 | 12.0123  | 15.85482 | Unclassified | chr9:77600616-77641458    | 38.843  |
| Fam98b        | 0 | 0 | 0 | 307  | 5.116667  | 19.4556  | 12.21812 | Unclassified | chr2:117073474-117097276  | 21.803  |
| Wdr34         | 0 | 0 | 0 | 360  | 6         | 3.87318  | 10.63938 | Unclassified | chr2:29887077-29906399    | 17.323  |
| Shroom4       | 0 | 0 | 0 | 51   | 0.85      | 0.037627 | 2.486766 | Unclassified | chrX:5975262-6210835      | 233.574 |
| Trem3         | 0 | 0 | 0 | 13   | 0.216667  | 0.180512 | 0.461038 | Unclassified | chr17:48384943-48398207   | 11.265  |
| 9530077C05Rik | 0 | 0 | 0 | 156  | 2.6       | 3.58798  | 10.23841 | Stalled      | chr9:22214020-22249123    | 33.104  |
| Stard8        | 0 | 0 | 0 | 45   | 0.75      | 0.480418 | 9.106349 | Unclassified | chrX:96235919-96270066    | 32.148  |
| Srrm3         | 0 | 0 | 0 | 105  | 1.75      | 0.459588 | 0.350846 | Unclassified | chr5:136291975-136350642  | 56.668  |
| Cst10         | 0 | 0 | 0 | 5    | 0.083333  | 0        | 2.00514  | Unclassified | chr2:149228984-149236014  | 5.031   |
| Trem1         | 0 | 0 | 0 | 23   | 0.383333  | 0.115155 | 0.385444 | Unclassified | chr17:48369921-48386091   | 14.171  |
| Gnas          | 0 | 0 | 0 | 1690 | 28.16667  | 266.506  | 3.971804 | Unclassified | chr2:174151414-174172243  | 18.83   |
| Wbscr28       | 0 | 0 | 0 | 18   | 0.3       | 0        | 0.37169  | Unclassified | chr5:135377463-135384603  | 5.141   |
| 4930529F22Rik | 0 | 0 | 0 | 2    | 0.033333  | 0.003054 | 0        | Unclassified | chr8:41876626-41882657    | 4.032   |
| Nox1          | 0 | 0 | 0 | 49   | 0.816667  | 0.045448 | 0        | Unclassified | chrX:130621684-130648247  | 24.564  |
| Acadl         | 0 | 0 | 0 | 362  | 6.033333  | 17.4535  | 28.77689 | Stalled      | chr1:66877426-66911841    | 32.416  |
| Cybb          | 0 | 0 | 0 | 828  | 13.8      | 25.747   | 1.298493 | Elongating   | chrX:9012377-9048450      | 34.074  |
| Cxadr         | 0 | 0 | 0 | 229  | 3.816667  | 0.788868 | 1.861179 | Unclassified | chr16:78299935-78360030   | 58.096  |
| Slc35d2       | 0 | 0 | 0 | 366  | 6.1       | 3.49627  | 26.73543 | Stalled      | chr13:64197617-64232638   | 33.022  |
| Col25a1       | 0 | 0 | 0 | 266  | 4.433333  | 0.675432 | 0.613643 | Unclassified | chr3:129881795-130299335  | 415.541 |
| Cyb561        | 0 | 0 | 0 | 26   | 0.433333  | 0.202036 | 3.340735 | Unclassified | chr11:105795017-105807461 | 10.445  |
| Pnma1         | 0 | 0 | 0 | 130  | 2.166667  | 2.33043  | 4.122616 | Unclassified | chr12:85487080-85491439   | 2.36    |
| Rragc         | 0 | 0 | 0 | 375  | 6.25      | 14.6558  | 27.19378 | Unclassified | chr4:123592675-123614240  | 19.566  |
| Olfir338      | 0 | 0 | 0 | 3    | 0.05      | 0.008586 | 0        | Unclassified | chr2:36230297-36233218    | 0.922   |
| Piga          | 0 | 0 | 0 | 204  | 3.4       | 3.11362  | 14.42425 | Stalled      | chrX:160855718-160871847  | 14.13   |
| Pik3ca        | 0 | 0 | 0 | 265  | 4.416667  | 3.39087  | 1.581895 | Unclassified | chr3:32333072-32367408    | 32.337  |
| Map3k13       | 0 | 0 | 0 | 82   | 1.366667  | 0.223454 | 0.327222 | Unclassified | chr16:21890041-21931950   | 39.91   |
| R3hdm2        | 0 | 0 | 0 | 586  | 9.766667  | 8.026    | 1.070825 | Unclassified | chr10:126855922-126936439 | 78.518  |
| Dhdh          | 0 | 0 | 0 | 228  | 3.8       | 2.70764  | 21.45243 | Stalled      | chr7:52728932-52746166    | 15.235  |
| Cyp2d40       | 0 | 0 | 0 | 4    | 0.066667  | 0.048912 | 0        | Unclassified | chr15:82590262-82596552   | 4.291   |
| Olfir348      | 0 | 0 | 0 | 3    | 0.05      | 0.073624 | 1        | Unclassified | chr2:36640046-36642988    | 0.943   |
| Cpn2          | 0 | 0 | 0 | 22   | 0.366667  | 0.061536 | 1.082046 | Unclassified | chr16:30256464-30269618   | 11.155  |
| AU023871      | 0 | 0 | 0 | 41   | 0.683333  | 0.264932 | 0.132985 | Unclassified | chr17:35199637-35205129   | 3.493   |
| Ppm1j         | 0 | 0 | 0 | 39   | 0.65      | 0.975713 | 1.32304  | Unclassified | chr3:104581973-104588935  | 4.963   |
| Muted         | 0 | 0 | 0 | 208  | 3.466667  | 6.07811  | 26.58388 | Stalled      | chr13:38694574-38728978   | 32.405  |
| Scin          | 0 | 0 | 0 | 71   | 1.183333  | 0.333837 | 3.183241 | Unclassified | chr12:40786359-40862815   | 74.457  |
| Tgds          | 0 | 0 | 0 | 358  | 5.966667  | 4.68439  | 33.46944 | Stalled      | chr14:118511132-118533987 | 20.856  |
| Clec1a        | 0 | 0 | 0 | 24   | 0.4       | 0.082357 | 0        | Unclassified | chr6:129376701-129404018  | 25.318  |
| Stmn2         | 0 | 0 | 0 | 33   | 0.55      | 0.708481 | 0        | Unclassified | chr3:8507526-8561604      | 52.079  |
| Scg2          | 0 | 0 | 0 | 6    | 0.1       | 0        | 1.05022  | Unclassified | chr1:79431243-79438665    | 5.423   |
| Scg3          | 0 | 0 | 0 | 43   | 0.716667  | 0.040947 | 0.485867 | Unclassified | chr9:754911173-75533863   | 40.691  |
| Zfp787        | 0 | 0 | 0 | 792  | 13.2      | 7.76978  | 16.90056 | Unclassified | chr7:6083090-6109573      | 24.484  |
| Lrrtm3        | 0 | 0 | 0 | 87   | 1.45      | 0.069871 | 0.654134 | Unclassified | chr10:63391244-63555003   | 161.76  |
| Nlrp3         | 0 | 0 | 0 | 23   | 0.383333  | 0.121119 | 0.55053  | Unclassified | chr11:59354187-59380458   | 24.272  |
| Prss38        | 0 | 0 | 0 | 6    | 0.1       | 0.031032 | 0.331774 | Unclassified | chr11:59186170-59191155   | 2.986   |
| Pramel6       | 0 | 0 | 0 | 2    | 0.033333  | 0        | 2        | Unclassified | chr2:87346614-87351022    | 2.409   |
| Stox1         | 0 | 0 | 0 | 159  | 2.65      | 3.76266  | 4.406318 | Unclassified | chr10:62122169-62190847   | 66.679  |
| A230051G13Rik | 0 | 0 | 0 | 537  | 8.95      | 4.51257  | 22.59196 | Unclassified | chr11:58968870-58979244   | 8.375   |
| Ndrgr2        | 0 | 0 | 0 | 34   | 0.566667  | 0.581734 | 6.385504 | Unclassified | chr14:52524945-52535163   | 8.219   |

|               |   |   |   |      |          |          |          |              |                           |          |
|---------------|---|---|---|------|----------|----------|----------|--------------|---------------------------|----------|
| Bag3          | 0 | 0 | 0 | 206  | 3.433333 | 2.41882  | 12.38825 | Stalled      | chr7:135665096-135690491  | 23.396   |
| Dcaf10        | 0 | 0 | 0 | 461  | 7.683333 | 2.80079  | 33.14325 | Unclassified | chr4:45352972-45392594    | 37.623   |
| Ankrd13c      | 0 | 0 | 0 | 712  | 11.86667 | 10.3756  | 40.38476 | Unclassified | chr3:157608429-157669801  | 59.373   |
| Abca9         | 0 | 0 | 0 | 38   | 0.633333 | 0.026581 | 0        | Unclassified | chr11:109962135-110031467 | 67.333   |
| Abca5         | 0 | 0 | 0 | 155  | 2.583333 | 1.02911  | 16.42202 | Stalled      | chr11:110130682-110201030 | 68.349   |
| Rsl1          | 0 | 0 | 0 | 146  | 2.433333 | 2.01852  | 19.86328 | Stalled      | chr13:67272117-67284434   | 10.318   |
| Dock8         | 0 | 0 | 0 | 4183 | 69.71667 | 16.7587  | 4.475362 | Unclassified | chr19:25072018-25276922   | 202.905  |
| Rapgef2       | 0 | 0 | 0 | 361  | 6.016667 | 0.855119 | 1.142802 | Unclassified | chr3:78866450-78951797    | 83.348   |
| Pbx4          | 0 | 0 | 0 | 198  | 3.3      | 2.6065   | 11.14497 | Stalled      | chr8:72354602-72396191    | 39.59    |
| Rwdd2a        | 0 | 0 | 0 | 205  | 3.416667 | 3.68207  | 40.11939 | Stalled      | chr9:86463594-86468505    | 2.912    |
| Nhirc4        | 0 | 0 | 0 | 16   | 0.266667 | 1.19231  | 0.10828  | Unclassified | chr17:26079177-26083876   | 2.7      |
| Dact1         | 0 | 0 | 0 | 12   | 0.2      | 0.246784 | 0.88343  | Unclassified | chr12:72408970-72419881   | 8.912    |
| Gapt          | 0 | 0 | 0 | 25   | 0.416667 | 0.754462 | 4.250737 | Unclassified | chr13:111142822-111149380 | 4.559    |
| Pde4d         | 0 | 0 | 0 | 1072 | 17.86667 | 0.757739 | 0.547588 | Unclassified | chr13:109442370-110741682 | 1297.313 |
| Act16b        | 0 | 0 | 0 | 24   | 0.4      | 0.190423 | 2.274379 | Unclassified | chr5:137992782-138010801  | 16.02    |
| Rdh12         | 0 | 0 | 0 | 181  | 3.016667 | 10.5631  | 7.76293  | Unclassified | chr12:80307900-80323648   | 13.749   |
| Fam81a        | 0 | 0 | 0 | 78   | 1.3      | 0.22672  | 1.676873 | Unclassified | chr9:69937116-69991364    | 52.249   |
| 1700022A21Rik | 0 | 0 | 0 | 1    | 0.016667 | 0.044255 | 0        | Unclassified | chr5:24149270-24154678    | 3.409    |
| Oaf           | 0 | 0 | 0 | 156  | 2.6      | 2.93529  | 6.362578 | Unclassified | chr9:43029360-43049899    | 18.54    |
| Kcnnk10       | 0 | 0 | 0 | 308  | 5.133333 | 0.141392 | 3.256604 | Unclassified | chr12:99672203-99818150   | 143.948  |
| C1qtnf6       | 0 | 0 | 0 | 95   | 1.583333 | 0.805433 | 3.269013 | Unclassified | chr15:78354515-78362047   | 5.533    |
| Olfr1213      | 0 | 0 | 0 | 0    | 0        | 0.027385 | 0        | Unclassified | chr2:88813110-88816046    | 0.937    |
| Col6a1        | 0 | 0 | 0 | 23   | 0.383333 | 0.025787 | 0        | Unclassified | chr10:76171536-76190789   | 17.254   |
| Col5a2        | 0 | 0 | 0 | 44   | 0.733333 | 0.027125 | 0.748469 | Unclassified | chr1:45431175-45562127    | 128.953  |
| Col5a1        | 0 | 0 | 0 | 241  | 4.016667 | 0.083896 | 0.388883 | Unclassified | chr2:27739944-27895030    | 153.087  |
| Col4a5        | 0 | 0 | 0 | 27   | 0.45     | 0.193389 | 0        | Unclassified | chrX:137907961-138123778  | 213.818  |
| Col8a1        | 0 | 0 | 0 | 84   | 1.4      | 0.022573 | 0        | Unclassified | chr16:57624368-57756850   | 130.483  |
| Col6a2        | 0 | 0 | 0 | 48   | 0.8      | 0.034369 | 1.131635 | Unclassified | chr10:76058500-76088149   | 27.65    |
| Mnx1          | 0 | 0 | 0 | 15   | 0.25     | 0.316887 | 1.153925 | Unclassified | chr5:29800362-29807010    | 4.649    |
| Hoxc11        | 0 | 0 | 0 | 5    | 0.083333 | 0.168083 | 0.370475 | Unclassified | chr15:102782956-102787132 | 2.177    |
| Col9a1        | 0 | 0 | 0 | 45   | 0.75     | 0.029667 | 0        | Unclassified | chr1:24182448-24259577    | 75.13    |
| BC018473      | 0 | 0 | 0 | 11   | 0.183333 | 0.437942 | 0        | Unclassified | chr11:116611480-116619197 | 5.718    |
| Cldnd1        | 0 | 0 | 0 | 581  | 9.683333 | 23.4175  | 5.984953 | Unclassified | chr16:58726156-58734350   | 6.195    |
| Wnt2b         | 0 | 0 | 0 | 83   | 1.383333 | 0.182837 | 1.830253 | Unclassified | chr3:104747722-104766627  | 16.906   |
| Ctxn3         | 0 | 0 | 0 | 12   | 0.2      | 0        | 1.039039 | Unclassified | chr18:57626139-57637788   | 9.65     |
| Olfr484       | 0 | 0 | 0 | 0    | 0        | 0        | 0        | Unclassified | chr7:115267809-115270775  | 0.967    |
| Zmynd11       | 0 | 0 | 0 | 1030 | 17.16667 | 11.638   | 7.791835 | Unclassified | chr13:9684081-9766454     | 80.374   |
| Prps2         | 0 | 0 | 0 | 305  | 5.083333 | 8.70182  | 20.75587 | Stalled      | chrX:163784264-163822631  | 36.368   |
| Olfr490       | 0 | 0 | 0 | 1    | 0.016667 | 0.040687 | 0        | Unclassified | chr7:115429693-115432638  | 0.946    |
| Olfr961       | 0 | 0 | 0 | 0    | 0        | 0        | 0        | Unclassified | chr9:39452312-39455257    | 0.946    |
| Olfr318       | 0 | 0 | 0 | 1    | 0.016667 | 0.035562 | 0        | Unclassified | chr11:58533627-58536548   | 0.922    |
| Olfr328       | 0 | 0 | 0 | 0    | 0        | 0.037085 | 0        | Unclassified | chr11:58364806-58367739   | 0.934    |
| Ccl26         | 0 | 0 | 0 | 9    | 0.15     | 0        | 4.758565 | Unclassified | chr5:136036317-136041439  | 3.123    |
| Olfr945       | 0 | 0 | 0 | 0    | 0        | 0        | 0        | Unclassified | chr9:39065304-39068264    | 0.961    |
| Gpha2         | 0 | 0 | 0 | 10   | 0.166667 | 0        | 0.327791 | Unclassified | chr19:6224400-6227767     | 1.368    |
| Mtap2         | 0 | 0 | 0 | 173  | 2.883333 | 0.276174 | 2.452526 | Unclassified | chr1:66219902-66489157    | 267.256  |
| 1700025G04Rik | 0 | 0 | 0 | 327  | 5.45     | 0.360024 | 11.51942 | Stalled      | chr1:153731653-153939450  | 205.798  |
| Gpc5          | 0 | 0 | 0 | 633  | 10.55    | 1.35024  | 2.083405 | Unclassified | chr14:115489436-116924414 | 1432.979 |
| Cts3          | 0 | 0 | 0 | 2    | 0.033333 | 0.040939 | 0        | Unclassified | chr13:61665989-61673426   | 5.438    |
| Fgf20         | 0 | 0 | 0 | 5    | 0.083333 | 0.121564 | 0        | Unclassified | chr8:41364519-41374307    | 7.789    |
| Zfp2          | 0 | 0 | 0 | 34   | 0.566667 | 0.205705 | 3.100233 | Unclassified | chr11:50712213-50731663   | 17.451   |
| Sertad4       | 0 | 0 | 0 | 13   | 0.216667 | 0.193308 | 1.596309 | Unclassified | chr1:194670681-194683915  | 11.235   |
| Zfp185        | 0 | 0 | 0 | 73   | 1.216667 | 0.086548 | 0.756633 | Unclassified | chrX:70230677-70276882    | 44.206   |
| Trim26        | 0 | 0 | 0 | 833  | 13.88333 | 24.7017  | 9.79653  | Unclassified | chr17:36972085-36996325   | 22.241   |
| Rnf112        | 0 | 0 | 0 | 12   | 0.2      | 0.021598 | 1.276852 | Unclassified | chr11:61261943-61269388   | 5.446    |
| Sfrs15        | 0 | 0 | 0 | 1456 | 24.26667 | 15.7392  | 19.45144 | Unclassified | chr16:90229384-90286670   | 55.287   |
| Fbxl13        | 0 | 0 | 0 | 368  | 6.133333 | 0.637147 | 55.24247 | Stalled      | chr5:20989664-21153423    | 161.76   |
| Bsx           | 0 | 0 | 0 | 12   | 0.2      | 0.439417 | 1.156494 | Unclassified | chr9:40680209-40686055    | 3.847    |
| Lcorl         | 0 | 0 | 0 | 924  | 15.4     | 2.19543  | 31.32214 | Unclassified | chr5:46091683-46250779    | 157.097  |
| 1700025F22Rik | 0 | 0 | 0 | 16   | 0.266667 | 0        | 2.689921 | Unclassified | chr19:11214172-11241810   | 25.639   |
| Ror2          | 0 | 0 | 0 | 247  | 4.116667 | 0.083846 | 0.839525 | Unclassified | chr13:53204685-53383478   | 176.794  |
| Pla2g10       | 0 | 0 | 0 | 26   | 0.433333 | 0.087783 | 0.397673 | Unclassified | chr16:13715154-13732678   | 15.525   |
| Ror1          | 0 | 0 | 0 | 292  | 4.866667 | 0.325554 | 1.091133 | Unclassified | chr4:99766395-100115150   | 346.756  |
| Nkrf          | 0 | 0 | 0 | 410  | 6.833333 | 2.49501  | 19.91987 | Stalled      | chrX:34427536-34444894    | 15.359   |
| 4930503E14Rik | 0 | 0 | 0 | 3    | 0.05     | 0        | 0        | Unclassified | chr14:44740831-44751036   | 8.206    |
| Phactr2       | 0 | 0 | 0 | 196  | 3.266667 | 0.997946 | 2.597886 | Unclassified | chr10:12933200-13045966   | 110.767  |
| 4933425L06Rik | 0 | 0 | 0 | 26   | 0.433333 | 0.011884 | 0.607301 | Unclassified | chr13:105870201-105911862 | 39.662   |
| Mapk1ip1l     | 0 | 0 | 0 | 872  | 14.53333 | 17.2878  | 11.5648  | Unclassified | chr14:47915988-47942766   | 24.779   |
| Pacrgl        | 0 | 0 | 0 | 267  | 4.45     | 5.32214  | 20.25156 | Unclassified | chr5:48761630-48779995    | 16.366   |
| D14Ert436e    | 0 | 0 | 0 | 227  | 3.783333 | 3.65121  | 9.24848  | Unclassified | chr14:48160568-48190109   | 27.542   |
| Zfp273        | 0 | 0 | 0 | 63   | 1.05     | 1.02777  | 15.56432 | Stalled      | chr13:67912752-67927937   | 13.186   |
| Lym7          | 0 | 0 | 0 | 442  | 7.366667 | 0.335106 | 52.17621 | Stalled      | chr11:54652790-54676093   | 21.304   |
| Nme5          | 0 | 0 | 0 | 28   | 0.466667 | 0.24736  | 2.772941 | Unclassified | chr18:34722294-34740760   | 16.467   |
| Edar          | 0 | 0 | 0 | 94   | 1.566667 | 0.100998 | 0.896368 | Unclassified | chr10:58063535-58140444   | 74.91    |
| Lass6         | 0 | 0 | 0 | 725  | 12.08333 | 2.23008  | 23.96799 | Stalled      | chr2:68697613-68949347    | 249.735  |
| Pnmal1        | 0 | 0 | 0 | 6    | 0.1      | 0.045583 | 1.812822 | Unclassified | chr7:17543143-17547669    | 2.527    |
| Htr1d         | 0 | 0 | 0 | 33   | 0.55     | 0.110182 | 0.848123 | Unclassified | chr4:135977438-136000317  | 20.88    |
| Ernm          | 0 | 0 | 0 | 5    | 0.083333 | 0.04732  | 0        | Unclassified | chr2:57897525-57907163    | 7.639    |
| Tcfe3         | 0 | 0 | 0 | 262  | 4.366667 | 11.158   | 9.773642 | Unclassified | chrX:7337786-7352328      | 12.543   |
| Tpo           | 0 | 0 | 0 | 61   | 1.016667 | 0.01562  | 0        | Unclassified | chr12:30739525-30819474   | 77.95    |
| Ppil6         | 0 | 0 | 0 | 81   | 1.35     | 1.68855  | 13.89438 | Stalled      | chr10:41208244-41234094   | 23.851   |
| Trp53bp2      | 0 | 0 | 0 | 535  | 8.916667 | 3.6097   | 43.01919 | Stalled      | chr1:184337297-184392567  | 53.271   |
| Ankrd34a      | 0 | 0 | 0 | 12   | 0.2      | 1.89266  | 1.200448 | Unclassified | chr3:96398558-96403701    | 3.144    |
| Tpmt          | 0 | 0 | 0 | 202  | 3.366667 | 0.372793 | 61.89294 | Stalled      | chr13:47118911-47140586   | 19.676   |
| Pmpcb         | 0 | 0 | 0 | 311  | 5.183333 | 15.5364  | 10.74814 | Unclassified | chr5:21240977-21262970    | 19.994   |
| Hoxc10        | 0 | 0 | 0 | 8    | 0.133333 | 0.284295 | 0.490965 | Unclassified | chr15:102795295-102802152 | 4.858    |

|                      |   |         |   |      |          |          |          |              |                           |          |
|----------------------|---|---------|---|------|----------|----------|----------|--------------|---------------------------|----------|
| <b>Olf391</b>        | 0 | 0       | 0 | 4    | 0.066667 | 0.022886 | 0.61781  | Unclassified | chr11:73612254-73618486   | 4.233    |
| <b>Olf1084</b>       | 0 | 0       | 0 | 0    | 0        | 0        | 0        | Unclassified | chr2:86478921-86481875    | 0.955    |
| <b>Olf774</b>        | 0 | 0       | 0 | 1    | 0.016667 | 0.016456 | 1        | Unclassified | chr10:128673206-128676145 | 0.94     |
| <b>Erap1</b>         | 0 | 0       | 0 | 512  | 8.533333 | 7.82085  | 23.44208 | Unclassified | chr13:74775319-74829323   | 52.005   |
| <b>Olf1471</b>       | 0 | 0       | 0 | 0    | 0        | 0        | 0        | Unclassified | chr19:13517503-13520448   | 0.946    |
| <b>Edn1</b>          | 0 | 0       | 0 | 18   | 0.3      | 1.42403  | 0.870291 | Unclassified | chr13:42394638-42403358   | 6.721    |
| <b>Olf1447</b>       | 0 | 0       | 0 | 0    | 0        | 0        | 0        | Unclassified | chr19:12975338-12978268   | 0.931    |
| <b>Edil3</b>         | 0 | 0       | 0 | 206  | 3.433333 | 0.325938 | 0.709531 | Unclassified | chr13:88959076-89462830   | 501.755  |
| <b>Dna2</b>          | 0 | 0       | 0 | 535  | 8.916667 | 4.89719  | 11.03526 | Unclassified | chr10:62407776-62436936   | 27.161   |
| <b>Ifitm7</b>        | 0 | 0       | 0 | 0    | 0        | 0.122889 | 0        | Unclassified | chr16:13982891-13986714   | 1.824    |
| <b>Aldob</b>         | 0 | 0       | 0 | 7    | 0.116667 | 0.052499 | 0        | Unclassified | chr4:49548866-49564355    | 13.49    |
| <b>Zfp192</b>        | 0 | 0       | 0 | 272  | 4.533333 | 1.29974  | 19.09885 | Unclassified | chr13:21605090-21624980   | 17.891   |
| <b>Reps1</b>         | 0 | 0       | 0 | 835  | 13.91667 | 10.8518  | 15.4299  | Unclassified | chr10:17773745-17844961   | 69.217   |
| <b>Csnk1a1</b>       | 0 | 0       | 0 | 1221 | 20.35    | 36.2041  | 12.68405 | Unclassified | chr18:61713235-61747953   | 32.719   |
| <b>Rbm9</b>          | 0 | 0       | 0 | 221  | 3.683333 | 0.286633 | 2.562434 | Unclassified | chr15:76909419-77139483   | 228.065  |
| <b>Renbp</b>         | 0 | 0       | 0 | 142  | 2.366667 | 8.07685  | 1.651031 | Elongating   | chrX:71167460-71178189    | 8.73     |
| <b>Lrrc15</b>        | 0 | 0       | 0 | 26   | 0.433333 | 0.050705 | 1.255476 | Unclassified | chr16:30269387-30285340   | 13.954   |
| <b>Khlh1</b>         | 0 | 0       | 0 | 123  | 2.05     | 0.031661 | 0.773311 | Unclassified | chr14:96504483-96920253   | 413.771  |
| <b>Dpf2</b>          | 0 | 0       | 0 | 506  | 8.433333 | 13.678   | 9.486673 | Unclassified | chr19:5897134-5914866     | 15.733   |
| <b>Igj</b>           | 0 | 136.711 | 0 | 69   | 1.15     | 190.74   | 1.508569 | Unclassified | chr5:88948834-88958922    | 8.089    |
| <b>Pzp</b>           | 0 | 0       | 0 | 27   | 0.45     | 0.054759 | 0        | Unclassified | chr6:128433584-128478738  | 43.155   |
| <b>Tex15</b>         | 0 | 0       | 0 | 18   | 0.3      | 0.150906 | 0        | Unclassified | chr8:34679015-34696057    | 15.043   |
| <b>Slc35f4</b>       | 0 | 0       | 0 | 122  | 2.033333 | 0.013627 | 1.310782 | Unclassified | chr14:49918194-50147512   | 227.319  |
| <b>Bcdin3d</b>       | 0 | 0       | 0 | 184  | 3.066667 | 5.55553  | 9.989485 | Unclassified | chr15:99300514-99307161   | 4.648    |
| <b>Cobll1</b>        | 0 | 0       | 0 | 724  | 12.06667 | 1.76393  | 23.6067  | Stalled      | chr2:64926395-65078683    | 150.289  |
| <b>Tmprss5</b>       | 0 | 0       | 0 | 15   | 0.25     | 0.012522 | 0        | Unclassified | chr9:48908883-48925690    | 14.808   |
| <b>Dub1</b>          | 0 | 0       | 0 | 6    | 0.1      | 0.033421 | 3.292411 | Unclassified | chr7:112003529-112011181  | 5.653    |
| <b>Skint9</b>        | 0 | 0       | 0 | 16   | 0.266667 | 0        | 0.758135 | Unclassified | chr4:112058573-112108590  | 48.018   |
| <b>Usp1715</b>       | 0 | 0       | 0 | 0    | 0        | 0.024175 | 0        | Unclassified | chr7:110563209-110567688  | 2.48     |
| <b>Tm4sf20</b>       | 0 | 0       | 0 | 56   | 0.933333 | 0.034109 | 0        | Unclassified | chr1:82753223-82767031    | 11.809   |
| <b>Skint2</b>        | 0 | 0       | 0 | 14   | 0.233333 | 0.045827 | 0        | Unclassified | chr4:112284356-112320445  | 34.09    |
| <b>Pdnp</b>          | 0 | 0       | 0 | 30   | 0.5      | 0.086738 | 0.517366 | Unclassified | chr4:142857324-142891410  | 32.087   |
| <b>Ddx60</b>         | 0 | 0       | 0 | 209  | 3.483333 | 1.31044  | 29.34034 | Stalled      | chr8:64404885-64516492    | 109.608  |
| <b>Aoc3</b>          | 0 | 0       | 0 | 73   | 1.216667 | 0.427256 | 3.540689 | Unclassified | chr11:101189919-101200742 | 8.824    |
| <b>Anxa8</b>         | 0 | 0       | 0 | 12   | 0.2      | 0        | 0        | Unclassified | chr14:34897175-34913754   | 14.58    |
| <b>Pnrc2</b>         | 0 | 0       | 0 | 585  | 9.75     | 23.4313  | 4.348084 | Unclassified | chr4:135426840-135431761  | 2.922    |
| <b>Asphd2</b>        | 0 | 0       | 0 | 14   | 0.233333 | 0.129295 | 1.032083 | Unclassified | chr5:112814465-112823233  | 6.769    |
| <b>V1rd22</b>        | 0 | 0       | 0 | 1    | 0.016667 | 0.068027 | 1        | Unclassified | chr7:24536929-24539871    | 0.943    |
| <b>Isl1</b>          | 0 | 0       | 0 | 14   | 0.233333 | 0.147139 | 5.076736 | Unclassified | chr13:117088477-117101896 | 11.42    |
| <b>Tppp2</b>         | 0 | 0       | 0 | 0    | 0        | 0        | 0        | Unclassified | chr14:52536435-52540375   | 1.941    |
| <b>Myh13</b>         | 0 | 0       | 0 | 41   | 0.683333 | 0.062915 | 0        | Unclassified | chr11:67138604-67185004   | 44.401   |
| <b>Acp5</b>          | 0 | 0       | 0 | 51   | 0.85     | 6.64765  | 0.145781 | Unclassified | chr9:21931170-21942190    | 9.021    |
| <b>Klk9</b>          | 0 | 0       | 0 | 12   | 0.2      | 0.104268 | 1.56765  | Unclassified | chr7:51045260-51052126    | 4.867    |
| <b>Itga2</b>         | 0 | 0       | 0 | 123  | 2.05     | 0.133693 | 5.10133  | Unclassified | chr13:115626119-115724249 | 96.131   |
| <b>Itga2b</b>        | 0 | 0       | 0 | 134  | 2.233333 | 1.0441   | 3.34254  | Unclassified | chr11:102314610-102333197 | 16.588   |
| <b>Zbtb3</b>         | 0 | 0       | 0 | 241  | 4.016667 | 3.27714  | 5.68272  | Unclassified | chr19:8874985-8879344     | 2.36     |
| <b>Sult1a1</b>       | 0 | 0       | 0 | 64   | 1.066667 | 0.116882 | 2.779841 | Unclassified | chr7:133816383-133821871  | 3.489    |
| <b>Dph3</b>          | 0 | 0       | 0 | 296  | 4.933333 | 6.41071  | 16.24294 | Unclassified | chr14:32893747-32900851   | 5.105    |
| <b>Spint2</b>        | 0 | 0       | 0 | 182  | 3.033333 | 13.8708  | 10.72099 | Stalled      | chr7:30041348-30068996    | 25.649   |
| <b>Spint1</b>        | 0 | 0       | 0 | 45   | 0.75     | 0.777772 | 2.500187 | Unclassified | chr2:119061095-119075249  | 12.155   |
| <b>4932414N04Rik</b> | 0 | 0       | 0 | 37   | 0.616667 | 0.010554 | 0        | Unclassified | chr2:68493940-68586522    | 90.583   |
| <b>Spna1</b>         | 0 | 0       | 0 | 49   | 0.816667 | 0.103333 | 0        | Unclassified | chr1:176100998-176178198  | 75.201   |
| <b>Clec4a4</b>       | 0 | 0       | 0 | 16   | 0.266667 | 0.032953 | 1.43157  | Unclassified | chr6:122938384-122974123  | 33.74    |
| <b>Elmod2</b>        | 0 | 0       | 0 | 239  | 3.983333 | 1.59158  | 38.01237 | Stalled      | chr8:85836530-85858385    | 19.856   |
| <b>Ang4</b>          | 0 | 0       | 0 | 6    | 0.1      | 0        | 0.635036 | Unclassified | chr14:52383566-52395265   | 9.7      |
| <b>B630019K06Rik</b> | 0 | 0       | 0 | 37   | 0.616667 | 1.06452  | 2.363636 | Unclassified | chrX:8467478-8472102      | 2.625    |
| <b>Rnf183</b>        | 0 | 0       | 0 | 123  | 2.05     | 2.93936  | 1.071049 | Elongating   | chr4:62088575-62097760    | 7.186    |
| <b>Atrn</b>          | 0 | 0       | 0 | 585  | 9.75     | 1.75659  | 50.08697 | Stalled      | chr2:130730231-130856062  | 123.832  |
| <b>Fbl1</b>          | 0 | 0       | 0 | 9    | 0.15     | 0.999619 | 0.0919   | Unclassified | chr11:35610881-35614386   | 1.506    |
| <b>Fga</b>           | 0 | 0       | 0 | 15   | 0.25     | 0.12097  | 0.350157 | Unclassified | chr3:82828074-82837539    | 7.466    |
| <b>Phf14</b>         | 0 | 0       | 0 | 562  | 9.366667 | 8.9049   | 36.61836 | Stalled      | chr6:11873880-11962096    | 86.217   |
| <b>Ghrhr</b>         | 0 | 0       | 0 | 26   | 0.433333 | 0.024061 | 2.306051 | Unclassified | chr6:55324288-55338524    | 12.237   |
| <b>Opcml</b>         | 0 | 0       | 0 | 692  | 11.53333 | 0.042778 | 1.865396 | Unclassified | chr9:27596853-28732633    | 1133.781 |
| <b>Myh6</b>          | 0 | 0       | 0 | 30   | 0.5      | 0.019605 | 0.44959  | Unclassified | chr14:55560757-55587444   | 24.688   |
| <b>Lpcat4</b>        | 0 | 0       | 0 | 238  | 3.966667 | 7.05512  | 12.67036 | Unclassified | chr2:112077997-112087268  | 7.272    |
| <b>Lrrc42</b>        | 0 | 0       | 0 | 284  | 4.733333 | 10.5234  | 29.39048 | Stalled      | chr4:106906118-106928138  | 20.021   |
| <b>Pcdh15</b>        | 0 | 0       | 0 | 387  | 6.45     | 0.063201 | 0        | Unclassified | chr10:73282614-74112475   | 827.862  |
| <b>Tnfaip6</b>       | 0 | 0       | 0 | 18   | 0.3      | 0.193771 | 2.376733 | Unclassified | chr2:51891632-51912201    | 18.57    |
| <b>Tnfrsf11a</b>     | 0 | 0       | 0 | 128  | 2.133333 | 0.144489 | 1.050301 | Unclassified | chr1:107675299-107744558  | 67.26    |
| <b>Tnfrsf18</b>      | 0 | 0       | 0 | 38   | 0.633333 | 7.12621  | 4.871741 | Unclassified | chr4:155398450-155403000  | 2.551    |
| <b>Tnfrsf1a</b>      | 0 | 0       | 0 | 33   | 0.55     | 0.475615 | 1.59975  | Unclassified | chr6:125297740-125312501  | 12.762   |
| <b>Otud7b</b>        | 0 | 0       | 0 | 772  | 12.86667 | 6.38404  | 15.55409 | Unclassified | chr3:95906449-95965052    | 56.604   |
| <b>Accs</b>          | 0 | 0       | 0 | 153  | 2.55     | 2.69377  | 6.459867 | Unclassified | chr2:93675609-93691933    | 14.325   |
| <b>Wdr67</b>         | 0 | 0       | 0 | 525  | 8.75     | 5.63971  | 10.5612  | Unclassified | chr15:57741753-57801623   | 57.871   |
| <b>Sik2</b>          | 0 | 0       | 0 | 550  | 9.166667 | 2.65073  | 32.33211 | Stalled      | chr9:50700905-50819178    | 116.274  |
| <b>Gtf2ird1</b>      | 0 | 0       | 0 | 384  | 6.4      | 0.85135  | 3.395358 | Unclassified | chr5:134833530-134934581  | 99.052   |
| <b>D19Erd737e</b>    | 0 | 0       | 0 | 413  | 6.883333 | 9.89514  | 24.17956 | Unclassified | chr19:60274488-60304600   | 28.113   |
| <b>Fam150b</b>       | 0 | 0       | 0 | 50   | 0.833333 | 0.09464  | 0.153641 | Unclassified | chr12:31567188-31578719   | 9.532    |
| <b>Olf894</b>        | 0 | 0       | 0 | 1    | 0.016667 | 0        | 1        | Unclassified | chr9:38024402-38027350    | 0.949    |
| <b>Scara3</b>        | 0 | 0       | 0 | 35   | 0.583333 | 0.097863 | 1.036534 | Unclassified | chr14:66538231-66574581   | 34.351   |
| <b>Adipor1</b>       | 0 | 0       | 0 | 548  | 9.133333 | 33.7387  | 19.02287 | Unclassified | chr1:136310043-136328918  | 16.876   |
| <b>Tmtc2</b>         | 0 | 0       | 0 | 555  | 9.25     | 1.05265  | 15.80467 | Stalled      | chr10:104624719-105013535 | 386.817  |
| <b>Olf26</b>         | 0 | 0       | 0 | 0    | 0        | 0        | 0        | Unclassified | chr9:38660644-38663573    | 0.93     |
| <b>38970</b>         | 0 | 0       | 0 | 1598 | 26.63333 | 14.0225  | 18.00363 | Unclassified | chr5:93520482-93603984    | 81.503   |
| <b>Klf5</b>          | 0 | 0       | 0 | 15   | 0.25     | 0.438149 | 1.600311 | Unclassified | chr14:99695909-99712628   | 14.72    |
| <b>Lrrc66</b>        | 0 | 0       | 0 | 41   | 0.683333 | 0.074586 | 2.529491 | Unclassified | chr5:73997880-74025660    | 25.781   |

|               |   |   |   |     |          |          |          |              |                           |         |
|---------------|---|---|---|-----|----------|----------|----------|--------------|---------------------------|---------|
| Slc10a4       | 0 | 0 | 0 | 7   | 0.116667 | 0.466616 | 2.149298 | Unclassified | chr5:73396142-73404194    | 6.053   |
| Cldn6         | 0 | 0 | 0 | 5   | 0.083333 | 0.119619 | 1.350016 | Unclassified | chr17:23814331-23819407   | 3.077   |
| Snora62       | 0 | 0 | 0 | 252 | 4.2      | 1.50191  | 139      | Unclassified | chr9:120037551-120039679  | 0.129   |
| Atp6ap1       | 0 | 0 | 0 | 222 | 3.7      | 23.1469  | 14.81815 | Unclassified | chrX:71540435-71550060    | 7.626   |
| Btk           | 0 | 0 | 0 | 527 | 8.783333 | 20.9423  | 7.619135 | Unclassified | chrX:131076879-131119679  | 40.801  |
| 13000181I7Rik | 0 | 0 | 0 | 281 | 4.683333 | 5.27911  | 7.498777 | Unclassified | chr8:125766257-125780075  | 11.819  |
| Prss22        | 0 | 0 | 0 | 13  | 0.216667 | 0.12584  | 0.489841 | Unclassified | chr17:24130500-24137067   | 4.568   |
| Krtap31-1     | 0 | 0 | 0 | 0   | 0        | 0        | 0        | Unclassified | chr11:99767233-99770204   | 0.972   |
| Fbxo43        | 0 | 0 | 0 | 41  | 0.683333 | 0.679365 | 6.382501 | Unclassified | chr15:36079814-36096639   | 14.826  |
| Iapp          | 0 | 0 | 0 | 0   | 0        | 0        | 0        | Unclassified | chr6:142244944-142252339  | 5.396   |
| Copb1         | 0 | 0 | 0 | 475 | 7.916667 | 19.6675  | 18.21645 | Unclassified | chr7:121359072-121400194  | 39.123  |
| P2ry12        | 0 | 0 | 0 | 225 | 3.75     | 0.25216  | 1.579808 | Unclassified | chr3:59020192-59068753    | 46.562  |
| Rnh1          | 0 | 0 | 0 | 274 | 4.566667 | 40.8824  | 4.680202 | Unclassified | chr7:148346224-148356588  | 8.365   |
| Sf3b4         | 0 | 0 | 0 | 504 | 8.4      | 25.8341  | 16.56299 | Unclassified | chr3:95974472-95981487    | 5.016   |
| Gm14458       | 0 | 0 | 0 | 0   | 0        | 0.007468 | 0        | Unclassified | chrX:8563025-8565881      | 0.857   |
| Ogdhl         | 0 | 0 | 0 | 47  | 0.783333 | 0.289844 | 1.113857 | Unclassified | chr14:33133204-33161006   | 25.803  |
| Creb31        | 0 | 0 | 0 | 233 | 3.883333 | 0.490982 | 0.921834 | Unclassified | chr2:91822484-91866327    | 41.844  |
| Vps39         | 0 | 0 | 0 | 619 | 10.31667 | 8.55146  | 10.74391 | Unclassified | chr2:120142201-120180869  | 36.669  |
| Tcfec         | 0 | 0 | 0 | 37  | 0.616667 | 0.057434 | 0.640223 | Unclassified | chr6:16783380-16850441    | 65.062  |
| Phox2b        | 0 | 0 | 0 | 15  | 0.25     | 0.063224 | 0        | Unclassified | chr5:67485637-67492365    | 4.729   |
| Olf1240       | 0 | 0 | 0 | 0   | 0        | 0.027125 | 0        | Unclassified | chr2:89279489-89282434    | 0.946   |
| Tcfcb         | 0 | 0 | 0 | 163 | 2.716667 | 34.1325  | 0.659301 | Unclassified | chr17:47920692-47929364   | 6.673   |
| Adm2          | 0 | 0 | 0 | 5   | 0.083333 | 0.196231 | 0.550725 | Unclassified | chr15:89151402-89155161   | 1.76    |
| Tcfap2c       | 0 | 0 | 0 | 17  | 0.283333 | 0.154286 | 0.33411  | Unclassified | chr2:172373092-172384119  | 9.028   |
| Tmsb15a       | 0 | 0 | 0 | 0   | 0        | 0.085728 | 0        | Unclassified | chrX:132253205-132257212  | 2.008   |
| Dolpp1        | 0 | 0 | 0 | 319 | 5.316667 | 10.0379  | 10.00422 | Unclassified | chr2:30245935-30256047    | 8.113   |
| Adamts20      | 0 | 0 | 0 | 91  | 1.516667 | 0.510791 | 1.814649 | Unclassified | chr15:94100594-94236781   | 134.188 |
| Rspo1         | 0 | 0 | 0 | 45  | 0.75     | 0.062894 | 1.071566 | Unclassified | chr4:124661673-124686343  | 22.671  |
| Skap1         | 0 | 0 | 0 | 443 | 7.383333 | 0.190136 | 2.008197 | Unclassified | chr11:96323937-96620936   | 295     |
| Pja2          | 0 | 0 | 0 | 228 | 3.8      | 3.5453   | 23.17186 | Stalled      | chr17:64630354-64683223   | 50.87   |
| Dll4          | 0 | 0 | 0 | 27  | 0.45     | 0.508754 | 0.575314 | Unclassified | chr2:119149519-119161402  | 9.884   |
| Tctn3         | 0 | 0 | 0 | 94  | 1.566667 | 4.20875  | 14.83634 | Stalled      | chr19:40670935-40688705   | 15.771  |
| Ubl4b         | 0 | 0 | 0 | 1   | 0.016667 | 0.046571 | 0        | Unclassified | chr3:107356615-107359991  | 1.377   |
| 4930524B15Rik | 0 | 0 | 0 | 16  | 0.266667 | 0.026169 | 2.168193 | Unclassified | chr11:31863632-31879651   | 14.02   |
| Rgag4         | 0 | 0 | 0 | 9   | 0.15     | 0.873085 | 2.612797 | Unclassified | chrX:99261880-99268646    | 4.767   |
| Zfand6        | 0 | 0 | 0 | 294 | 4.9      | 10.4029  | 1.470791 | Unclassified | chr7:91763563-91829861    | 64.299  |
| Fat2          | 0 | 0 | 0 | 93  | 1.55     | 0.04443  | 0        | Unclassified | chr11:55064111-55127759   | 61.649  |
| Krtap16-1     | 0 | 0 | 0 | 0   | 0        | 0        | 0        | Unclassified | chr16:88873909-88876514   | 0.606   |
| Gprc5a        | 0 | 0 | 0 | 49  | 0.816667 | 0.346717 | 8.412867 | Unclassified | chr6:135013679-135034724  | 19.046  |
| Grm2          | 0 | 0 | 0 | 46  | 0.766667 | 0.030883 | 3.364204 | Unclassified | chr9:106546867-106560440  | 11.574  |
| Plp2          | 0 | 0 | 0 | 193 | 3.216667 | 18.917   | 5.126827 | Unclassified | chrX:7245241-7250404      | 3.164   |
| Olf912        | 0 | 0 | 0 | 2   | 0.033333 | 0.032156 | 0.492128 | Unclassified | chr9:38385828-38389796    | 1.969   |
| Gm13547       | 0 | 0 | 0 | 45  | 0.75     | 0.118589 | 0.59261  | Unclassified | chr2:29615082-29624516    | 7.435   |
| Erc6          | 0 | 0 | 0 | 863 | 14.38333 | 2.12261  | 32.93962 | Unclassified | chr14:33324706-33394175   | 67.47   |
| Gm13034       | 0 | 0 | 0 | 0   | 0        | 1.31452  | 0        | Unclassified | chr4:146032924-146036119  | 1.196   |
| Tll1          | 0 | 0 | 0 | 86  | 1.433333 | 2.31952  | 9.785376 | Unclassified | chr15:83314198-83343337   | 27.14   |
| Saa1          | 0 | 0 | 0 | 4   | 0.066667 | 0.584354 | 0        | Unclassified | chr7:53995868-54000350    | 2.483   |
| Serpina1f     | 0 | 0 | 0 | 13  | 0.216667 | 0.012175 | 1.180385 | Unclassified | chr12:104926253-104935739 | 7.487   |
| Shprh         | 0 | 0 | 0 | 403 | 6.716667 | 2.64934  | 26.06775 | Stalled      | chr10:10867227-10935071   | 65.845  |
| 1110012L19Rik | 0 | 0 | 0 | 58  | 0.966667 | 5.6667   | 6.389866 | Unclassified | chrX:67637087-67642591    | 3.505   |
| Tmem174       | 0 | 0 | 0 | 5   | 0.083333 | 0.034147 | 0.417589 | Unclassified | chr13:99404932-99409365   | 2.434   |
| 1110012J17Rik | 0 | 0 | 0 | 117 | 1.95     | 0.204223 | 1.997944 | Unclassified | chr17:66686321-66801090   | 112.77  |
| Sirt5         | 0 | 0 | 0 | 56  | 0.933333 | 1.1569   | 0.933474 | Unclassified | chr13:43464084-43490572   | 24.489  |
| Samd3         | 0 | 0 | 0 | 39  | 0.65     | 0.056357 | 1.056928 | Unclassified | chr10:25947512-25991978   | 42.467  |
| Olf1416       | 0 | 0 | 0 | 2   | 0.033333 | 0.033299 | 1        | Unclassified | chr1:94376257-94379196    | 0.94    |
| Olf13         | 0 | 0 | 0 | 2   | 0.033333 | 0        | 0        | Unclassified | chr6:43121986-43124919    | 0.934   |
| C130060K24Rik | 0 | 0 | 0 | 49  | 0.816667 | 0.069442 | 0.612459 | Unclassified | chr6:65329287-65408144    | 76.858  |
| Jam2          | 0 | 0 | 0 | 121 | 2.016667 | 2.96647  | 0.885796 | Unclassified | chr16:84772367-84823129   | 48.763  |
| Zfp606        | 0 | 0 | 0 | 129 | 2.15     | 6.12686  | 8.204525 | Unclassified | chr7:13061653-13081584    | 17.932  |
| Olf1683       | 0 | 0 | 0 | 1   | 0.016667 | 0        | 1        | Unclassified | chr7:112291863-112294823  | 0.961   |
| Gm1027        | 0 | 0 | 0 | 81  | 1.35     | 0.082572 | 0.741186 | Unclassified | chr4:106353021-106402535  | 47.515  |
| Pfn2          | 0 | 0 | 0 | 96  | 1.6      | 2.54496  | 7.325864 | Unclassified | chr3:57645817-57653679    | 5.863   |
| Mup20         | 0 | 0 | 0 | 0   | 0        | 0.028862 | 0        | Unclassified | chr4:61711268-61717151    | 3.884   |
| Baat          | 0 | 0 | 0 | 17  | 0.283333 | 0.039353 | 1.661679 | Unclassified | chr4:49502290-49521430    | 17.141  |
| Ube2u         | 0 | 0 | 0 | 62  | 1.033333 | 0        | 0.539453 | Unclassified | chr4:100149471-100222750  | 71.28   |
| Gm12789       | 0 | 0 | 0 | 3   | 0.05     | 0.033375 | 0        | Unclassified | chr4:101657444-101662836  | 3.393   |
| Rcan1         | 0 | 0 | 0 | 328 | 5.466667 | 4.52505  | 9.170347 | Unclassified | chr16:92392197-92468391   | 74.195  |
| Nek2          | 0 | 0 | 0 | 683 | 11.38333 | 20.6168  | 7.041799 | Unclassified | chr1:193643351-193656928  | 11.578  |
| Gc            | 0 | 0 | 0 | 17  | 0.283333 | 0.049935 | 0        | Unclassified | chr5:89846546-89888790    | 40.245  |
| Olf12         | 0 | 0 | 0 | 2   | 0.033333 | 0.065124 | 1        | Unclassified | chr7:114144388-114147372  | 0.985   |
| Mrps2         | 0 | 0 | 0 | 241 | 4.016667 | 13.1358  | 5.108402 | Unclassified | chr2:28321585-28326697    | 3.113   |
| Syt11         | 0 | 0 | 0 | 115 | 1.916667 | 2.64005  | 1.302663 | Unclassified | chr3:88548622-88578521    | 27.9    |
| Cbr3          | 0 | 0 | 0 | 123 | 2.05     | 3.32373  | 16.28262 | Stalled      | chr16:93681463-93691235   | 7.773   |
| Snrnp35       | 0 | 0 | 0 | 519 | 8.65     | 12.9872  | 12.39667 | Unclassified | chr5:124931163-124941131  | 7.969   |
| Zfp652        | 0 | 0 | 0 | 129 | 2.15     | 2.43085  | 1.139942 | Unclassified | chr11:95608380-95626027   | 15.648  |
| Trub1         | 0 | 0 | 0 | 351 | 5.85     | 5.46792  | 11.43075 | Unclassified | chr19:57525395-57565493   | 38.099  |
| AU018778      | 0 | 0 | 0 | 14  | 0.233333 | 0        | 0.633524 | Unclassified | chr8:95780138-95805610    | 23.473  |
| Gdr156        | 0 | 0 | 0 | 106 | 1.766667 | 0.131435 | 1.413903 | Unclassified | chr16:37914581-38007615   | 91.035  |
| Wdsu1         | 0 | 0 | 0 | 168 | 2.8      | 3.09581  | 21.21969 | Stalled      | chr2:59690423-59722663    | 30.241  |
| Rhox1         | 0 | 0 | 0 | 2   | 0.033333 | 0.087186 | 0        | Unclassified | chrX:34753799-34764253    | 8.455   |
| Epha6         | 0 | 0 | 0 | 427 | 7.116667 | 0.027379 | 0        | Unclassified | chr16:59653308-60607357   | 952.05  |
| Tshz1         | 0 | 0 | 0 | 572 | 9.533333 | 4.39249  | 11.81984 | Unclassified | chr18:84181018-84257954   | 74.937  |
| Ephb3         | 0 | 0 | 0 | 31  | 0.516667 | 0.13914  | 2.659158 | Unclassified | chr16:21202867-21223377   | 18.511  |
| Hmgn5         | 0 | 0 | 0 | 133 | 2.216667 | 11.8058  | 32.20729 | Stalled      | chrX:106199875-106210719  | 8.845   |
| Ephb6         | 0 | 0 | 0 | 36  | 0.6      | 0.170611 | 7.941486 | Unclassified | chr6:41553480-41570506    | 15.027  |
| Thoc3         | 0 | 0 | 0 | 342 | 5.7      | 18.7044  | 9.89304  | Unclassified | chr13:54560198-54572201   | 10.004  |



|               |   |   |   |      |          |          |          |              |                           |         |
|---------------|---|---|---|------|----------|----------|----------|--------------|---------------------------|---------|
| Chml          | 0 | 0 | 0 | 26   | 0.433333 | 0.880011 | 1.27181  | Unclassified | chr1:177612368-177620484  | 6.117   |
| Cadm3         | 0 | 0 | 0 | 53   | 0.883333 | 0.110937 | 2.5802   | Unclassified | chr1:175264384-175299826  | 33.443  |
| Pole4         | 0 | 0 | 0 | 559  | 9.316667 | 17.3902  | 40.30778 | Unclassified | chr6:82596705-82604859    | 6.155   |
| Luc7l         | 0 | 0 | 0 | 1207 | 20.11667 | 18.7071  | 13.361   | Unclassified | chr17:26387854-26422449   | 32.596  |
| Olfr143       | 0 | 0 | 0 | 2    | 0.033333 | 0.020392 | 2        | Unclassified | chr9:38059003-38061945    | 0.943   |
| Ipo13         | 0 | 0 | 0 | 395  | 6.583333 | 12.0073  | 22.85905 | Unclassified | chr4:117567097-117589604  | 20.508  |
| 2410002022Rik | 0 | 0 | 0 | 553  | 9.216667 | 9.62077  | 42.15176 | Unclassified | chr13:104932232-104970546 | 36.315  |
| 4933411K20Rik | 0 | 0 | 0 | 124  | 2.066667 | 2.49321  | 0.176265 | Unclassified | chr8:47252909-47280944    | 26.036  |
| Tubal3        | 0 | 0 | 0 | 7    | 0.116667 | 0.099268 | 0.614965 | Unclassified | chr13:3921940-3934522     | 10.583  |
| Tmem125       | 0 | 0 | 0 | 15   | 0.25     | 0.158311 | 2.239816 | Unclassified | chr4:118213545-118218331  | 2.787   |
| Ssbp2         | 0 | 0 | 0 | 1260 | 21       | 1.18598  | 19.02276 | Unclassified | chr13:91598701-91845780   | 245.08  |
| Slc25a23      | 0 | 0 | 0 | 60   | 1        | 2.55805  | 2.428668 | Unclassified | chr17:57183134-57201286   | 16.153  |
| Neo1          | 0 | 0 | 0 | 103  | 1.716667 | 0.13246  | 3.786178 | Unclassified | chr9:58722486-58886248    | 161.763 |
| Ttll8         | 0 | 0 | 0 | 60   | 1        | 0.056136 | 0.845093 | Unclassified | chr15:88744327-88786840   | 40.514  |
| Faim2         | 0 | 0 | 0 | 60   | 1        | 0.065739 | 1.059143 | Unclassified | chr15:99327435-99360448   | 31.014  |
| Baiap212      | 0 | 0 | 0 | 105  | 1.75     | 0.395699 | 2.577335 | Unclassified | chr15:79088624-79117939   | 27.316  |
| Vmn2r39       | 0 | 0 | 0 | 1    | 0.016667 | 0        | 0        | Unclassified | chr7:9145158-9163091      | 15.934  |
| Mea1          | 0 | 0 | 0 | 294  | 4.9      | 46.7415  | 8.429716 | Unclassified | chr17:46816085-46820054   | 1.97    |
| Atp1b1        | 0 | 0 | 0 | 122  | 2.033333 | 1.98392  | 8.276857 | Unclassified | chr1:166367397-166390486  | 21.09   |
| Cplx4         | 0 | 0 | 0 | 36   | 0.6      | 0.058389 | 1.513563 | Unclassified | chr18:66115375-66131832   | 14.458  |
| Tbl3          | 0 | 0 | 0 | 430  | 7.166667 | 15.3918  | 6.755952 | Unclassified | chr17:24837597-24846598   | 7.002   |
| Catsper1      | 0 | 0 | 0 | 19   | 0.316667 | 0.018656 | 0        | Unclassified | chr19:5333740-5344153     | 8.414   |
| Kank4         | 0 | 0 | 0 | 85   | 1.416667 | 0.040043 | 0.870431 | Unclassified | chr4:98421582-98486228    | 62.647  |
| Sestd1        | 0 | 0 | 0 | 105  | 1.75     | 0.186175 | 2.945187 | Unclassified | chr2:77024131-77120649    | 94.519  |
| Aebp1         | 0 | 0 | 0 | 283  | 4.716667 | 0.467282 | 0.198214 | Unclassified | chr11:5759868-5772228     | 10.361  |
| Trim68        | 0 | 0 | 0 | 150  | 2.5      | 2.72513  | 26.41468 | Stalled      | chr7:109826093-109837840  | 9.748   |
| Nt5c1a        | 0 | 0 | 0 | 30   | 0.5      | 0.081337 | 1.914965 | Unclassified | chr4:122876795-122893450  | 14.656  |
| Numa1         | 0 | 0 | 0 | 920  | 15.33333 | 18.4262  | 5.423879 | Unclassified | chr7:109116356-109163472  | 45.117  |
| Avil          | 0 | 0 | 0 | 114  | 1.9      | 0.527851 | 3.29733  | Unclassified | chr10:126435764-126458050 | 20.287  |
| Kcnc1         | 0 | 0 | 0 | 636  | 10.6     | 1.64673  | 2.955907 | Elongating   | chr2:166928882-167016299  | 85.418  |
| Nell1         | 0 | 0 | 0 | 482  | 8.033333 | 0.05925  | 3.251391 | Unclassified | chr7:57228719-58118659    | 887.941 |
| Tmprs2        | 0 | 0 | 0 | 108  | 1.8      | 0.048654 | 0.925635 | Unclassified | chr16:97786288-97834802   | 46.515  |
| Unc13b        | 0 | 0 | 0 | 188  | 3.133333 | 0.377745 | 4.828653 | Unclassified | chr4:43069855-43277745    | 205.891 |
| Umps          | 0 | 0 | 0 | 495  | 8.25     | 19.3503  | 8.541252 | Unclassified | chr16:33955097-33969089   | 11.993  |
| Umod          | 0 | 0 | 0 | 17   | 0.283333 | 0.025934 | 0.506417 | Unclassified | chr7:126606380-126624769  | 16.39   |
| Ulk1          | 0 | 0 | 0 | 466  | 7.766667 | 5.08418  | 14.43377 | Unclassified | chr5:111213507-111241100  | 25.594  |
| Dpysl3        | 0 | 0 | 0 | 62   | 1.033333 | 0.136476 | 2.177545 | Unclassified | chr18:43483880-43554985   | 69.106  |
| Naglu         | 0 | 0 | 0 | 252  | 4.2      | 8.01445  | 20.99628 | Stalled      | chr11:100929407-100938983 | 7.577   |
| Frzb          | 0 | 0 | 0 | 29   | 0.483333 | 0.184344 | 0.599499 | Unclassified | chr2:80252126-80289553    | 35.428  |
| Olfr909       | 0 | 0 | 0 | 3    | 0.05     | 0.054771 | 2        | Unclassified | chr9:38329318-38332254    | 0.937   |
| Cwf1912       | 0 | 0 | 0 | 454  | 7.566667 | 3.23803  | 20.36601 | Stalled      | chr9:3402084-3479236      | 75.153  |
| Rxfp3         | 0 | 0 | 0 | 7    | 0.116667 | 0.141667 | 1.040461 | Unclassified | chr15:10963471-10969723   | 4.253   |
| Adamts12      | 0 | 0 | 0 | 184  | 3.066667 | 0.030838 | 0        | Unclassified | chr15:10992544-11276622   | 282.079 |
| Fgfr1         | 0 | 0 | 0 | 108  | 1.8      | 0.10777  | 1.434977 | Unclassified | chr8:26627243-26686186    | 56.944  |
| Sdr42e1       | 0 | 0 | 0 | 44   | 0.733333 | 0.66455  | 0.826692 | Unclassified | chr8:120185298-120197415  | 10.118  |
| Rin2          | 0 | 0 | 0 | 118  | 1.966667 | 0.099074 | 1.405609 | Unclassified | chr2:145609851-145713352  | 101.502 |
| C130074G19Rik | 0 | 0 | 0 | 13   | 0.216667 | 0.088829 | 0.957939 | Unclassified | chr1:186695804-186708915  | 11.112  |
| Atp1a2        | 0 | 0 | 0 | 92   | 1.533333 | 0.095057 | 0.219813 | Unclassified | chr1:174201839-174230195  | 26.357  |
| Mrpl2         | 0 | 0 | 0 | 334  | 5.566667 | 44.8121  | 12.03161 | Unclassified | chr17:46781196-46787081   | 3.886   |
| Hamp2         | 0 | 0 | 0 | 4    | 0.066667 | 0.046551 | 0.56425  | Unclassified | chr7:31707415-31711200    | 1.786   |
| Mrpl15        | 0 | 0 | 0 | 516  | 8.6      | 22.0794  | 19.37311 | Unclassified | chr1:4764014-4777768      | 11.755  |
| Tpm2          | 0 | 0 | 0 | 36   | 0.6      | 0.171033 | 2.845812 | Unclassified | chr4:43527583-43538260    | 8.678   |
| 2010012005Rik | 0 | 0 | 0 | 415  | 6.916667 | 5.9589   | 9.365904 | Unclassified | chr19:46762395-46777872   | 13.478  |
| Wdr13         | 0 | 0 | 0 | 262  | 4.366667 | 4.91043  | 12.46357 | Stalled      | chrX:7700427-7711984      | 9.558   |
| Arhgap18      | 0 | 0 | 0 | 273  | 4.55     | 1.81057  | 14.31501 | Stalled      | chr10:26490317-26638454   | 146.138 |
| Dynll1        | 0 | 0 | 0 | 360  | 6        | 36.3618  | 7.243925 | Unclassified | chr5:115747118-115752999  | 3.882   |
| Actl6a        | 0 | 0 | 0 | 657  | 10.95    | 30.6201  | 12.82204 | Unclassified | chr3:32605467-32625893    | 18.427  |
| Il7r          | 0 | 0 | 0 | 24   | 0.4      | 0.115675 | 0.496927 | Unclassified | chr15:9435913-9461631     | 23.719  |
| Olfr1219      | 0 | 0 | 0 | 0    | 0        | 0.043862 | 0        | Unclassified | chr2:88914310-88917246    | 0.937   |
| Orc6l         | 0 | 0 | 0 | 658  | 10.96667 | 24.6589  | 23.98996 | Unclassified | chr8:87821530-87832177    | 8.648   |
| Bcam          | 0 | 0 | 0 | 37   | 0.616667 | 0.505838 | 2.442234 | Unclassified | chr7:20341486-20357881    | 14.396  |
| Slc25a20      | 0 | 0 | 0 | 106  | 1.766667 | 10.1186  | 8.814951 | Unclassified | chr9:108562428-108586972  | 22.545  |
| Vsig2         | 0 | 0 | 0 | 14   | 0.233333 | 0.032862 | 1.985531 | Unclassified | chr9:37344839-37351790    | 4.952   |
| Slurp1        | 0 | 0 | 0 | 50   | 0.833333 | 0        | 0.265071 | Unclassified | chr15:74557073-74560456   | 1.384   |
| Lenep         | 0 | 0 | 0 | 20   | 0.333333 | 2.59348  | 13       | Unclassified | chr3:89205818-89208572    | 0.755   |
| Olfr202       | 0 | 0 | 0 | 1    | 0.016667 | 0.041611 | 0        | Unclassified | chr16:59283397-59286321   | 0.925   |
| Mtmr11        | 0 | 0 | 0 | 123  | 2.05     | 0.76597  | 0.371511 | Unclassified | chr3:95963892-95975640    | 9.749   |
| Olfr1508      | 0 | 0 | 0 | 4    | 0.066667 | 0.144313 | 0        | Unclassified | chr14:53082395-53089136   | 4.742   |
| Olfr1509      | 0 | 0 | 0 | 2    | 0.033333 | 0.497721 | 1        | Unclassified | chr14:53068067-53071077   | 1.011   |
| Olfr124       | 0 | 0 | 0 | 2    | 0.033333 | 0        | 1        | Unclassified | chr17:37940091-37943039   | 0.949   |
| Olfr520       | 0 | 0 | 0 | 1    | 0.016667 | 0.040334 | 0        | Unclassified | chr7:106881654-106884605  | 0.952   |
| L1cam         | 0 | 0 | 0 | 41   | 0.683333 | 0.411888 | 2.60317  | Unclassified | chrX:71099118-71128173    | 27.056  |
| Olfr668       | 0 | 0 | 0 | 1    | 0.016667 | 0.009435 | 0        | Unclassified | chr7:112073319-112076276  | 0.958   |
| Olfr667       | 0 | 0 | 0 | 3    | 0.05     | 0.054945 | 2        | Unclassified | chr7:112064827-112067808  | 0.982   |
| Olfr691       | 0 | 0 | 0 | 3    | 0.05     | 0.052905 | 1        | Unclassified | chr7:112485259-112488228  | 0.97    |
| Olfr1390      | 0 | 0 | 0 | 2    | 0.033333 | 0.033018 | 2        | Unclassified | chr11:49152035-49154971   | 0.937   |
| Olfr1389      | 0 | 0 | 0 | 2    | 0.033333 | 0        | 0        | Unclassified | chr11:49241979-49244915   | 0.937   |
| Gm4763        | 0 | 0 | 0 | 6    | 0.1      | 0        | 0.570407 | Unclassified | chr7:25507512-25511309    | 1.798   |
| Bche          | 0 | 0 | 0 | 21   | 0.35     | 0.016513 | 1.580611 | Unclassified | chr3:73439730-73514337    | 72.608  |
| Csda          | 0 | 0 | 0 | 976  | 16.26667 | 71.0042  | 3.528546 | Unclassified | chr6:131314875-131340468  | 23.594  |
| Bcap29        | 0 | 0 | 0 | 588  | 9.8      | 10.3893  | 21.03626 | Unclassified | chr12:32280218-32321462   | 39.245  |
| Bcan          | 0 | 0 | 0 | 77   | 1.283333 | 0.509985 | 0.607861 | Unclassified | chr3:87791452-87806278    | 12.827  |
| Nupl2         | 0 | 0 | 0 | 399  | 6.65     | 3.27286  | 23.80688 | Unclassified | chr5:23668780-23689826    | 19.047  |
| Gbx1          | 0 | 0 | 0 | 42   | 0.7      | 0.326342 | 0.348789 | Unclassified | chr5:24010243-24034666    | 22.424  |
| Chn2          | 0 | 0 | 0 | 28   | 0.466667 | 0.268306 | 1.076781 | Unclassified | chr6:54220815-54251806    | 28.992  |
| Fsd1          | 0 | 0 | 0 | 24   | 0.4      | 0.058656 | 2.216301 | Unclassified | chr17:56123933-56136304   | 10.372  |



|               |   |   |   |      |          |          |          |              |                           |          |
|---------------|---|---|---|------|----------|----------|----------|--------------|---------------------------|----------|
| BC031441      | 0 | 0 | 0 | 226  | 3.766667 | 0.997102 | 24.93943 | Stalled      | chr17:56077797-56086682   | 6.886    |
| Cno           | 0 | 0 | 0 | 198  | 3.3      | 21.8008  | 42.74981 | Unclassified | chr5:37138612-37141918    | 1.307    |
| Oifr1113      | 0 | 0 | 0 | 0    | 0        | 0        | 0        | Unclassified | chr2:87051050-87054031    | 0.982    |
| Gm5416        | 0 | 0 | 0 | 6    | 0.1      | 0        | 0.614903 | Unclassified | chr16:36208488-36217874   | 7.387    |
| Wfdc13        | 0 | 0 | 0 | 8    | 0.133333 | 0.023867 | 0.695936 | Unclassified | chr2:164508606-164513206  | 2.601    |
| Agpat2        | 0 | 0 | 0 | 334  | 5.566667 | 3.56775  | 18.1075  | Unclassified | chr2:26449106-26461730    | 10.625   |
| 2810432D09Rik | 0 | 0 | 0 | 215  | 3.583333 | 24.4361  | 3.155844 | Unclassified | chr4:41659064-41662549    | 1.486    |
| Radil         | 0 | 0 | 0 | 101  | 1.683333 | 0.020913 | 2.885944 | Unclassified | chr5:142960794-143029031  | 66.238   |
| Syap1         | 0 | 0 | 0 | 104  | 1.733333 | 6.32355  | 16.96755 | Stalled      | chrX:159294776-159328394  | 31.619   |
| R3hdm1        | 0 | 0 | 0 | 893  | 14.88333 | 6.97776  | 27.94688 | Unclassified | chr1:129997882-130134312  | 134.431  |
| Gaint16       | 0 | 0 | 0 | 483  | 8.05     | 0.043922 | 0        | Unclassified | chr8:60255019-61392424    | 1135.406 |
| Kctd4         | 0 | 0 | 0 | 98   | 1.633333 | 0        | 0.790937 | Unclassified | chr14:76352809-76365024   | 10.216   |
| Lingo4        | 0 | 0 | 0 | 13   | 0.216667 | 0.10875  | 0.280293 | Unclassified | chr3:94201140-94208423    | 5.284    |
| Tmem121       | 0 | 0 | 0 | 15   | 0.25     | 0.232296 | 1.2161   | Unclassified | chr12:114422113-114427733 | 3.621    |
| Pdia2         | 0 | 0 | 0 | 124  | 2.066667 | 0.052129 | 0.857846 | Unclassified | chr17:26332943-26338032   | 3.09     |
| Adam12        | 0 | 0 | 0 | 233  | 3.883333 | 0.030208 | 0        | Unclassified | chr7:141074882-141418780  | 341.899  |
| Nfrkb         | 0 | 0 | 0 | 624  | 10.4     | 8.35988  | 17.01664 | Unclassified | chr9:31191796-31228918    | 35.123   |
| Trim63        | 0 | 0 | 0 | 19   | 0.316667 | 0.055762 | 0        | Unclassified | chr4:133869034-133885544  | 14.511   |
| 9430016H08Rik | 0 | 0 | 0 | 246  | 4.1      | 15.1579  | 28.13688 | Stalled      | chr1:57461391-57472802    | 9.412    |
| Tmem45b       | 0 | 0 | 0 | 72   | 1.2      | 0.016275 | 0.346063 | Unclassified | chr9:31233780-31273823    | 38.044   |
| Klhl26        | 0 | 0 | 0 | 649  | 10.81667 | 4.81275  | 4.742628 | Unclassified | chr8:72974126-73002842    | 26.717   |
| Sdr16c5       | 0 | 0 | 0 | 17   | 0.283333 | 0        | 0        | Unclassified | chr4:3923088-3948810      | 23.723   |
| Gm382         | 0 | 0 | 0 | 5    | 0.083333 | 0        | 0.85194  | Unclassified | chrX:123572503-123598518  | 24.016   |
| Krt23         | 0 | 0 | 0 | 18   | 0.3      | 0        | 0.938253 | Unclassified | chr11:99339286-99356424   | 15.139   |
| Intu          | 0 | 0 | 0 | 141  | 2.35     | 0.875425 | 11.52281 | Stalled      | chr3:40437688-40508662    | 68.975   |
| Hrg           | 0 | 0 | 0 | 11   | 0.183333 | 0.022123 | 0        | Unclassified | chr16:22949144-22961733   | 10.59    |
| Ddx20         | 0 | 0 | 0 | 342  | 5.7      | 7.43336  | 16.28091 | Unclassified | chr3:105481379-105492489  | 9.111    |
| Lix1          | 0 | 0 | 0 | 46   | 0.766667 | 0.11631  | 2.280503 | Unclassified | chr17:17537649-17596351   | 56.703   |
| Wbscr27       | 0 | 0 | 0 | 181  | 3.016667 | 3.47017  | 4.86149  | Unclassified | chr5:135406242-135418507  | 10.266   |
| Rfx5          | 0 | 0 | 0 | 434  | 7.233333 | 9.64513  | 0.790942 | Unclassified | chr3:94756936-94765483    | 6.548    |
| Dcp2          | 0 | 0 | 0 | 1026 | 17.1     | 6.08176  | 21.03823 | Unclassified | chr18:44538153-44584623   | 44.471   |
| Dennd5b       | 0 | 0 | 0 | 526  | 8.766667 | 2.24931  | 8.37697  | Unclassified | chr6:148936590-149052202  | 113.613  |
| Naa30         | 0 | 0 | 0 | 294  | 4.9      | 4.89189  | 30.70414 | Stalled      | chr14:49789901-49810706   | 18.806   |
| Klhl15        | 0 | 0 | 0 | 387  | 6.45     | 2.48145  | 43.28672 | Stalled      | chrX:91478268-91518854    | 38.587   |
| Gstm6         | 0 | 0 | 0 | 10   | 0.166667 | 0.061176 | 0        | Unclassified | chr3:107741765-107748667  | 4.903    |
| Gstm3         | 0 | 0 | 0 | 11   | 0.183333 | 0.332053 | 1.168179 | Unclassified | chr3:107766613-107774076  | 5.464    |
| Pr12b1        | 0 | 0 | 0 | 4    | 0.066667 | 0.029667 | 1.529578 | Unclassified | chr13:27475213-27484715   | 7.503    |
| Pdk3          | 0 | 0 | 0 | 350  | 5.833333 | 9.7761   | 39.39907 | Stalled      | chrX:91009954-91079434    | 67.481   |
| Pcsk1         | 0 | 0 | 0 | 23   | 0.383333 | 0.106973 | 1.349731 | Unclassified | chr13:75225434-75269946   | 42.513   |
| Giul          | 0 | 0 | 0 | 435  | 7.25     | 10.755   | 40.70478 | Stalled      | chr1:155745074-155756844  | 9.771    |
| Pcp2          | 0 | 0 | 0 | 98   | 1.633333 | 0.741863 | 0.902661 | Unclassified | chr8:3623370-3627545      | 2.176    |
| Ndn12         | 0 | 0 | 0 | 213  | 3.55     | 22.7715  | 31.46488 | Unclassified | chr7:72016535-72019926    | 1.392    |
| Pla2g4d       | 0 | 0 | 0 | 55   | 0.916667 | 0.039003 | 2.245802 | Unclassified | chr2:120091604-120116805  | 23.202   |
| Rxfp2         | 0 | 0 | 0 | 67   | 1.116667 | 0.090762 | 0.486433 | Unclassified | chr5:150819249-150884761  | 63.513   |
| Gstp2         | 0 | 0 | 0 | 8    | 0.133333 | 32.1571  | 0.712834 | Unclassified | chr19:4040287-4044221     | 1.935    |
| Aldh1l2       | 0 | 0 | 0 | 223  | 3.716667 | 0.558083 | 1.608381 | Unclassified | chr10:82950191-82998885   | 46.695   |
| Agtpbp1       | 0 | 0 | 0 | 1095 | 18.25    | 4.868    | 24.80314 | Unclassified | chr13:59550895-59660680   | 107.786  |
| Oifr1298      | 0 | 0 | 0 | 0    | 0        | 0        | 0        | Unclassified | chr2:111485213-111488152  | 0.94     |
| Vopp1         | 0 | 0 | 0 | 362  | 6.033333 | 3.33003  | 18.79613 | Stalled      | chr6:57702257-57777119    | 72.863   |
| Cyp4f15       | 0 | 0 | 0 | 22   | 0.366667 | 0.13295  | 0        | Unclassified | chr17:32820603-32840294   | 17.692   |
| Cyp11b2       | 0 | 0 | 0 | 17   | 0.283333 | 0.051256 | 0.844546 | Unclassified | chr15:74681439-74688748   | 5.31     |
| Tceal1        | 0 | 0 | 0 | 22   | 0.366667 | 0.115349 | 3.724224 | Unclassified | chrX:133240603-133244405  | 1.803    |
| Cyp17a1       | 0 | 0 | 0 | 17   | 0.283333 | 0.055693 | 0        | Unclassified | chr19:46741654-46749490   | 5.837    |
| Cyp19a1       | 0 | 0 | 0 | 19   | 0.316667 | 0.102617 | 0        | Unclassified | chr9:54013743-54043249    | 27.507   |
| Cyp1a1        | 0 | 0 | 0 | 24   | 0.4      | 0.078286 | 1.358463 | Unclassified | chr9:57533734-57551629    | 15.896   |
| Rassf9        | 0 | 0 | 0 | 18   | 0.3      | 0.060512 | 1.351439 | Unclassified | chr10:101972855-102009194 | 34.34    |
| Cyp21a1       | 0 | 0 | 0 | 4    | 0.066667 | 0.021333 | 1.350649 | Unclassified | chr17:34938292-34943371   | 3.08     |
| Zdhhc23       | 0 | 0 | 0 | 85   | 1.416667 | 0.39083  | 1.644647 | Unclassified | chr16:43969258-43981163   | 9.906    |
| Zfp187        | 0 | 0 | 0 | 234  | 3.9      | 3.94733  | 16.18472 | Unclassified | chr13:21534043-21547596   | 11.554   |
| Mrps9         | 0 | 0 | 0 | 738  | 12.3     | 25.4854  | 15.0581  | Unclassified | chr1:42906077-42962528    | 54.452   |
| Nr5a1         | 0 | 0 | 0 | 47   | 0.783333 | 0.034792 | 2.024821 | Unclassified | chr2:38548179-38572062    | 21.884   |
| Tmem151b      | 0 | 0 | 0 | 32   | 0.533333 | 0.471407 | 1.63919  | Unclassified | chr17:45678900-45688626   | 7.727    |
| Gm11315       | 0 | 0 | 0 | 0    | 0        | 0        | 0        | Unclassified | chr13:22897448-22900387   | 0.94     |
| Chrd11        | 0 | 0 | 0 | 34   | 0.566667 | 0.022097 | 0.765275 | Unclassified | chrX:139720216-139830805  | 108.59   |
| Fth17         | 0 | 0 | 0 | 1    | 0.016667 | 0.007539 | 0        | Unclassified | chrX:8608611-8611459      | 0.849    |
| Mov101l       | 0 | 0 | 0 | 76   | 1.266667 | 0.034793 | 0.490218 | Unclassified | chr15:88811423-88885582   | 72.16    |
| Nxf2          | 0 | 0 | 0 | 45   | 0.75     | 0.108063 | 0        | Unclassified | chrX:131479069-131501293  | 20.225   |
| Nlk           | 0 | 0 | 0 | 576  | 9.6      | 3.62229  | 29.5185  | Stalled      | chr11:78380669-78512927   | 130.259  |
| B230312A22Rik | 0 | 0 | 0 | 262  | 4.366667 | 3.57893  | 3.178238 | Unclassified | chr4:43045381-43061075    | 13.695   |
| Pabpn1        | 0 | 0 | 0 | 446  | 7.433333 | 108.871  | 7.288404 | Unclassified | chr14:55510979-55517764   | 4.786    |
| Prkd1         | 0 | 0 | 0 | 143  | 2.383333 | 0.074652 | 0.688336 | Unclassified | chr12:51442218-51752210   | 307.993  |
| Pbsn          | 0 | 0 | 0 | 3    | 0.05     | 0        | 0        | Unclassified | chrX:75083236-75100839    | 15.604   |
| Nkx6-1        | 0 | 0 | 0 | 22   | 0.366667 | 0.22848  | 0.487794 | Unclassified | chr5:102088215-102095730  | 5.516    |
| Nkx3-1        | 0 | 0 | 0 | 8    | 0.133333 | 0.167507 | 0.994638 | Unclassified | chr14:69806748-69812715   | 3.968    |
| Nkx2-9        | 0 | 0 | 0 | 7    | 0.116667 | 0.255102 | 0        | Unclassified | chr12:57712383-57716271   | 1.889    |
| Scn5a         | 0 | 0 | 0 | 181  | 3.016667 | 0.121096 | 2.129134 | Unclassified | chr9:119392528-119490134  | 95.607   |
| Scn7a         | 0 | 0 | 0 | 37   | 0.616667 | 0.038451 | 0        | Unclassified | chr2:66511482-66624967    | 111.486  |
| Scn8a         | 0 | 0 | 0 | 243  | 4.05     | 0.193642 | 0.853638 | Unclassified | chr15:100699113-100876360 | 175.248  |
| Scn9a         | 0 | 0 | 0 | 60   | 1        | 0.04236  | 1.45939  | Unclassified | chr2:66318137-66475009    | 154.873  |
| Rbbp9         | 0 | 0 | 0 | 78   | 1.3      | 2.27252  | 3.68897  | Unclassified | chr2:144368000-144378595  | 8.596    |
| Scnn1g        | 0 | 0 | 0 | 48   | 0.8      | 0.056193 | 1.759163 | Unclassified | chr7:128876020-128911991  | 33.972   |
| Setd5         | 0 | 0 | 0 | 2042 | 34.03333 | 13.4681  | 29.23095 | Unclassified | chr6:113025632-113103418  | 75.787   |
| Rpusd1        | 0 | 0 | 0 | 197  | 3.283333 | 9.00391  | 10.39821 | Stalled      | chr17:25862695-25868401   | 3.707    |
| Xlr4c         | 0 | 0 | 0 | 2    | 0.033333 | 0.891288 | 0.889576 | Unclassified | chrX:70479414-70490469    | 9.056    |
| Sc1t1         | 0 | 0 | 0 | 371  | 6.183333 | 2.96195  | 64.78602 | Stalled      | chr3:41430626-41548436    | 115.811  |
| Lipt2         | 0 | 0 | 0 | 315  | 5.25     | 5.00488  | 32.93918 | Unclassified | chr7:107305786-107309441  | 1.656    |

|               |   |          |   |      |          |          |          |              |                           |         |
|---------------|---|----------|---|------|----------|----------|----------|--------------|---------------------------|---------|
| Nradd         | 0 | 0        | 0 | 262  | 4.366667 | 1.10075  | 1.820245 | Elongating   | chr9:110523638-110528897  | 3.26    |
| Lpar6         | 0 | 129.7257 | 0 | 148  | 2.466667 | 15.8805  | 1.841113 | Elongating   | chr14:73635697-73640165   | 2.469   |
| Olfr160       | 0 | 0        | 0 | 2    | 0.033333 | 0.055006 | 2        | Unclassified | chr9:37518933-37521865    | 0.933   |
| Mybpc2        | 0 | 0        | 0 | 291  | 4.85     | 1.6016   | 2.673746 | Elongating   | chr7:51757068-51782026    | 22.959  |
| Il24          | 0 | 0        | 0 | 14   | 0.233333 | 0.080389 | 0.565747 | Unclassified | chr1:132778650-132785988  | 5.339   |
| Mypn          | 0 | 0        | 0 | 116  | 1.933333 | 0.058634 | 0        | Unclassified | chr10:62578542-62668700   | 88.159  |
| Ugt2a3        | 0 | 0        | 0 | 6    | 0.1      | 0.004981 | 0.737274 | Unclassified | chr5:87753996-87768220    | 12.225  |
| Entpd8        | 0 | 0        | 0 | 14   | 0.233333 | 0.033347 | 0.268203 | Unclassified | chr2:24933842-24941239    | 5.398   |
| Vtcn1         | 0 | 0        | 0 | 71   | 1.183333 | 0.02444  | 2.620199 | Unclassified | chr3:100627381-100700845  | 71.465  |
| BC037703      | 0 | 0        | 0 | 49   | 0.816667 | 0.039623 | 0        | Unclassified | chr3:101616998-101642146  | 23.149  |
| Sqrdl         | 0 | 0        | 0 | 28   | 0.466667 | 0.22363  | 0        | Unclassified | chr2:122605734-122635285  | 27.552  |
| Myoz1         | 0 | 0        | 0 | 10   | 0.166667 | 0.019809 | 0.958333 | Unclassified | chr14:21468323-21477762   | 7.44    |
| Moxd1         | 0 | 0        | 0 | 60   | 1        | 0.203698 | 1.775214 | Unclassified | chr10:23941322-24022589   | 79.268  |
| Thap11        | 0 | 0        | 0 | 83   | 1.383333 | 17.1871  | 4.74109  | Unclassified | chr8:108377002-108380850  | 1.849   |
| Has2          | 0 | 0        | 0 | 16   | 0.266667 | 0.042278 | 0.666039 | Unclassified | chr15:56497181-56528101   | 28.921  |
| Has1          | 0 | 0        | 0 | 32   | 0.533333 | 0.042926 | 0.259472 | Unclassified | chr17:17980291-17994152   | 11.862  |
| Hand2         | 0 | 0        | 0 | 7    | 0.116667 | 0.074547 | 0.388005 | Unclassified | chr8:59797779-59803314    | 3.536   |
| Hand1         | 0 | 0        | 0 | 8    | 0.133333 | 0.290359 | 0.288762 | Unclassified | chr11:57642214-57647649   | 3.436   |
| Ccr4          | 0 | 0        | 0 | 59   | 0.983333 | 0.9012   | 1.24443  | Unclassified | chr9:114399433-114407662  | 6.23    |
| Hao1          | 0 | 0        | 0 | 35   | 0.583333 | 0.025266 | 0        | Unclassified | chr2:134323096-134382088  | 56.993  |
| Idh3a         | 0 | 0        | 0 | 378  | 6.3      | 13.8427  | 13.36681 | Unclassified | chr9:54432317-54452469    | 18.153  |
| Krtap17-1     | 0 | 0        | 0 | 3    | 0.05     | 0.067366 | 3        | Unclassified | chr11:99854547-99857308   | 0.762   |
| Krtap16-5     | 0 | 0        | 0 | 0    | 0        | 0        | 0        | Unclassified | chr16:88877757-88880283   | 0.527   |
| Lpar4         | 0 | 0        | 0 | 3    | 0.05     | 0.181407 | 0        | Unclassified | chrX:104113963-104129238  | 13.276  |
| Shroom1       | 0 | 0        | 0 | 23   | 0.383333 | 0.396021 | 1.495304 | Unclassified | chr11:53268706-53281257   | 10.552  |
| Olfr476       | 0 | 0        | 0 | 1    | 0.016667 | 0        | 1        | Unclassified | chr7:115108912-11511845   | 0.934   |
| Olfr481       | 0 | 0        | 0 | 0    | 0        | 0.027298 | 0        | Unclassified | chr7:115222309-115225248  | 0.94    |
| Olfr376       | 0 | 0        | 0 | 1    | 0.016667 | 0.067108 | 0        | Unclassified | chr11:73186252-73189206   | 0.955   |
| Olfr20        | 0 | 0        | 0 | 1    | 0.016667 | 0.054185 | 1        | Unclassified | chr11:73165256-73168201   | 0.946   |
| Cntnap5c      | 0 | 0        | 0 | 280  | 4.666667 | 0.026169 | 1.395707 | Unclassified | chr17:57906992-58549765   | 640.774 |
| Olfr477       | 0 | 0        | 0 | 1    | 0.016667 | 0.020589 | 1        | Unclassified | chr7:115131880-115134813  | 0.934   |
| Olfr799       | 0 | 0        | 0 | 1    | 0.016667 | 0        | 1        | Unclassified | chr10:129082185-129085121 | 0.937   |
| 38783         | 0 | 0        | 0 | 93   | 1.55     | 1.24166  | 8.232232 | Unclassified | chr6:116286140-116359558  | 71.419  |
| Zfp367        | 0 | 0        | 0 | 839  | 13.98333 | 5.88955  | 18.30607 | Unclassified | chr13:64234364-64256507   | 20.144  |
| Gpr165        | 0 | 0        | 0 | 3    | 0.05     | 0.044139 | 0.831138 | Unclassified | chrX:93906806-93914727    | 5.922   |
| Stard3nl      | 0 | 0        | 0 | 262  | 4.366667 | 4.54133  | 32.57467 | Stalled      | chr13:19449544-19489621   | 38.078  |
| 1700030F18Rik | 0 | 0        | 0 | 20   | 0.333333 | 0.298491 | 0.420033 | Unclassified | chr15:99748778-99764089   | 13.312  |
| 2200002D01Rik | 0 | 0        | 0 | 55   | 0.916667 | 2.11156  | 36       | Unclassified | chr7:30032539-30035486    | 0.948   |
| Defb29        | 0 | 0        | 0 | 4    | 0.066667 | 0        | 2        | Unclassified | chr2:152364449-152367777  | 1.329   |
| Csgalnact1    | 0 | 0        | 0 | 327  | 5.45     | 0.400408 | 2.705636 | Unclassified | chr8:70880681-71261041    | 378.361 |
| Atp13a5       | 0 | 0        | 0 | 106  | 1.766667 | 0.019783 | 1.758138 | Unclassified | chr16:29231999-29380818   | 146.82  |
| Npy           | 0 | 0        | 0 | 10   | 0.166667 | 0.070549 | 4.607656 | Unclassified | chr6:49770727-49779504    | 6.778   |
| Zmym4         | 0 | 0        | 0 | 602  | 10.03333 | 2.82332  | 20.25739 | Stalled      | chr4:126539064-126647167  | 106.104 |
| Morn4         | 0 | 0        | 0 | 48   | 0.8      | 1.36209  | 8.570466 | Unclassified | chr19:42149428-42162860   | 11.433  |
| Ift81         | 0 | 0        | 0 | 140  | 2.333333 | 0.312805 | 10.59431 | Stalled      | chr5:123000212-123066527  | 64.316  |
| Ilf2          | 0 | 0        | 0 | 354  | 5.9      | 29.0074  | 8.958515 | Unclassified | chr3:90278122-90292301    | 12.18   |
| Ubttd1        | 0 | 0        | 0 | 390  | 6.5      | 3.12202  | 25.54024 | Stalled      | chr19:42054252-42109131   | 52.88   |
| Cdo1          | 0 | 0        | 0 | 39   | 0.65     | 0.636395 | 6.356852 | Unclassified | chr18:46872858-46889996   | 15.139  |
| Cdkn2c        | 0 | 0        | 0 | 97   | 1.616667 | 11.2848  | 14.27412 | Stalled      | chr4:109333480-109339977  | 4.498   |
| Mia1          | 0 | 0        | 0 | 66   | 1.1      | 0.406867 | 0.562469 | Unclassified | chr7:27964759-27968168    | 1.41    |
| 6330577E15Rik | 0 | 0        | 0 | 277  | 4.616667 | 30.1046  | 20.70832 | Stalled      | chr19:47804245-47810078   | 3.834   |
| Cdr2          | 0 | 0        | 0 | 319  | 5.316667 | 3.61818  | 43.67962 | Stalled      | chr7:128100549-128127826  | 25.278  |
| Cox17         | 0 | 0        | 0 | 348  | 5.8      | 141.631  | 8.64278  | Unclassified | chr16:38345084-38352849   | 5.766   |
| Usp28         | 0 | 0        | 0 | 993  | 16.55    | 3.21555  | 11.99772 | Unclassified | chr9:48791489-48850622    | 57.134  |
| Mmp3          | 0 | 0        | 0 | 7    | 0.116667 | 0.028481 | 0.69591  | Unclassified | chr9:7443821-7455974      | 10.154  |
| Foxd3         | 0 | 0        | 0 | 13   | 0.216667 | 0.137193 | 1.293379 | Unclassified | chr4:99320989-99325362    | 2.374   |
| Cyp2d11       | 0 | 0        | 0 | 10   | 0.166667 | 0.06786  | 0.300699 | Unclassified | chr15:82219583-82226452   | 4.87    |
| Tmem106a      | 0 | 0        | 0 | 101  | 1.683333 | 0.801755 | 6.195862 | Unclassified | chr11:101441555-101453099 | 9.545   |
| Rundc1        | 0 | 0        | 0 | 302  | 5.033333 | 7.73273  | 12.18429 | Unclassified | chr11:101284398-101296977 | 10.58   |
| Gbp8          | 0 | 0        | 0 | 54   | 0.9      | 1.80253  | 5.388471 | Unclassified | chr5:105443171-105484580  | 39.41   |
| Zfp13         | 0 | 0        | 0 | 281  | 4.683333 | 1.36578  | 27.72933 | Stalled      | chr17:23712818-23738454   | 23.637  |
| Adam9         | 0 | 0        | 0 | 1186 | 19.76667 | 9.70757  | 15.72356 | Unclassified | chr8:26060082-26129394    | 67.313  |
| Dkc1          | 0 | 0        | 0 | 483  | 8.05     | 22.3837  | 12.33309 | Unclassified | chrX:72339192-72355115    | 13.924  |
| Tnrc4         | 0 | 0        | 0 | 136  | 2.266667 | 0.102755 | 0.536151 | Unclassified | chr3:94280752-94296115    | 13.364  |
| Mkrn3         | 0 | 0        | 0 | 15   | 0.25     | 0.216233 | 1.953136 | Unclassified | chr7:69562478-69567025    | 2.548   |
| Lnx1          | 0 | 0        | 0 | 243  | 4.05     | 0.116831 | 0        | Unclassified | chr5:74988471-75100928    | 110.458 |
| Zfp617        | 0 | 0        | 0 | 295  | 4.916667 | 1.33669  | 16.9027  | Unclassified | chr8:74444723-74458529    | 11.807  |
| Gpr111        | 0 | 0        | 0 | 27   | 0.45     | 0.031231 | 1.126546 | Unclassified | chr17:42845885-42881128   | 33.244  |
| Neil2         | 0 | 0        | 0 | 75   | 1.25     | 0.394884 | 22.03336 | Stalled      | chr14:63801281-63814362   | 11.082  |
| Cgnl1         | 0 | 0        | 0 | 167  | 2.783333 | 0.068313 | 1.88301  | Unclassified | chr9:71474315-71621409    | 145.095 |
| Wbp4          | 0 | 0        | 0 | 675  | 11.25    | 8.09107  | 40.97507 | Unclassified | chr14:79859743-79883075   | 21.333  |
| Wbp5          | 0 | 0        | 0 | 64   | 1.066667 | 23.6004  | 9.452896 | Unclassified | chrX:132777618-132781678  | 2.061   |
| Itgb1bp2      | 0 | 0        | 0 | 167  | 2.783333 | 0.247802 | 2.072749 | Elongating   | chrX:98642447-98648880    | 4.434   |
| Eif4h         | 0 | 0        | 0 | 1699 | 28.31667 | 150.669  | 5.436701 | Unclassified | chr5:135095745-135117198  | 19.454  |
| Baz1b         | 0 | 0        | 0 | 1768 | 29.46667 | 27.0643  | 12.37161 | Unclassified | chr5:135661192-135721999  | 58.808  |
| Wfdc12        | 0 | 0        | 0 | 2    | 0.033333 | 0.017678 | 0        | Unclassified | chr2:164014966-164018294  | 1.329   |
| Tars          | 0 | 0        | 0 | 556  | 9.266667 | 32.5832  | 10.36839 | Unclassified | chr15:11313417-11331413   | 15.997  |
| Esx1          | 0 | 0        | 0 | 5    | 0.083333 | 0.448571 | 0.49565  | Unclassified | chrX:133649935-133656865  | 4.931   |
| Tmc7          | 0 | 0        | 0 | 97   | 1.616667 | 0.111835 | 4.387882 | Unclassified | chr7:125679357-125730200  | 48.844  |
| Esr1          | 0 | 0        | 0 | 471  | 7.85     | 0.459951 | 14.49396 | Stalled      | chr10:5342779-5736495     | 391.717 |
| Esr2          | 0 | 0        | 0 | 59   | 0.983333 | 0.344709 | 3.135958 | Unclassified | chr12:77221405-77280246   | 56.842  |
| Gm757         | 0 | 0        | 0 | 11   | 0.183333 | 0.050733 | 1.217714 | Unclassified | chr2:25089995-25094307    | 2.313   |
| Ipp           | 0 | 0        | 0 | 483  | 8.05     | 5.34215  | 80.61115 | Stalled      | chr4:116178153-116210840  | 30.688  |
| Ly6g5b        | 0 | 0        | 0 | 96   | 1.6      | 0.352297 | 1.439824 | Unclassified | chr17:35250889-35254345   | 1.457   |
| Armc4         | 0 | 0        | 0 | 90   | 1.5      | 0.014744 | 0        | Unclassified | chr18:7088230-7299899     | 209.67  |
| Olfr701       | 0 | 0        | 0 | 5    | 0.083333 | 0.025105 | 0        | Unclassified | chr7:113955657-113964223  | 6.567   |

|               |   |   |   |      |          |          |          |              |                           |         |
|---------------|---|---|---|------|----------|----------|----------|--------------|---------------------------|---------|
| 4933433P14Rik | 0 | 0 | 0 | 388  | 6.466667 | 3.2147   | 20.17196 | Unclassified | chr12:106921561-106941267 | 17.707  |
| 4933439F11Rik | 0 | 0 | 0 | 3    | 0.05     | 0        | 1        | Unclassified | chr11:102744482-102748045 | 1.564   |
| 4933436I01Rik | 0 | 0 | 0 | 1    | 0.016667 | 0        | 1        | Unclassified | chrX:65173038-65176625    | 1.588   |
| B230118H07Rik | 0 | 0 | 0 | 63   | 1.05     | 0.513852 | 1.584984 | Unclassified | chr2:101400937-101471143  | 68.207  |
| Trap1a        | 0 | 0 | 0 | 2    | 0.033333 | 0        | 0        | Unclassified | chrX:135866221-135872704  | 4.484   |
| Smr3a         | 0 | 0 | 0 | 5    | 0.083333 | 0.057992 | 0.556098 | Unclassified | chr5:88429549-88437559    | 6.011   |
| Tabppl        | 0 | 0 | 0 | 479  | 7.983333 | 22.3994  | 8.477485 | Unclassified | chr6:125174238-125183878  | 7.641   |
| Gpx6          | 0 | 0 | 0 | 11   | 0.183333 | 0.101556 | 0.391098 | Unclassified | chr13:21402071-21411493   | 7.423   |
| Zbtb34        | 0 | 0 | 0 | 231  | 3.85     | 1.06371  | 21.4721  | Stalled      | chr2:33261627-33288844    | 25.218  |
| 9030224M15Rik | 0 | 0 | 0 | 103  | 1.716667 | 0.175793 | 1.692188 | Unclassified | chr10:40401087-40530889   | 127.803 |
| Pof1b         | 0 | 0 | 0 | 13   | 0.216667 | 0.016473 | 0        | Unclassified | chrX:109752035-109814260  | 60.226  |
| Hddc2         | 0 | 0 | 0 | 360  | 6        | 8.58537  | 39.86071 | Stalled      | chr10:31031210-31047892   | 14.683  |
| Wisp3         | 0 | 0 | 0 | 78   | 1.3      | 0.343456 | 0.136193 | Unclassified | chr10:38870776-38885600   | 12.825  |
| 2310057J16Rik | 0 | 0 | 0 | 310  | 5.166667 | 0.570261 | 0.511453 | Unclassified | chr8:3585449-3609074      | 21.626  |
| 2310057N15Rik | 0 | 0 | 0 | 0    | 0        | 0.022768 | 0        | Unclassified | chr16:88773425-88776451   | 1.027   |
| 2310046K01Rik | 0 | 0 | 0 | 45   | 0.75     | 0.442763 | 3.847478 | Unclassified | chr2:151820246-151834993  | 12.748  |
| Bub1          | 0 | 0 | 0 | 252  | 4.2      | 6.08817  | 16.63213 | Stalled      | chr2:127625935-127659595  | 31.661  |
| Olfr1329      | 0 | 0 | 0 | 2    | 0.033333 | 0.002801 | 1        | Unclassified | chr4:118589129-118592070  | 0.942   |
| Olfr506       | 0 | 0 | 0 | 0    | 0        | 0.029914 | 0        | Unclassified | chr7:115753822-115756767  | 0.946   |
| Olfr1034      | 0 | 0 | 0 | 0    | 0        | 0.020589 | 0        | Unclassified | chr2:85884640-85887573    | 0.934   |
| Olfr94        | 0 | 0 | 0 | 4    | 0.066667 | 0.187664 | 2        | Unclassified | chr17:37333750-37336911   | 1.162   |
| Rit2          | 0 | 0 | 0 | 135  | 2.25     | 0        | 1.439783 | Unclassified | chr18:31133967-31478782   | 342.816 |
| Ring1         | 0 | 0 | 0 | 373  | 6.216667 | 11.4895  | 11.48499 | Unclassified | chr17:34157738-34163625   | 3.888   |
| Igf1          | 0 | 0 | 0 | 63   | 1.05     | 0.088243 | 1.132308 | Unclassified | chr10:87319800-87399792   | 77.993  |
| Ripk1         | 0 | 0 | 0 | 667  | 11.11667 | 5.08958  | 29.13267 | Unclassified | chr13:34092742-34127039   | 32.298  |
| Cyr61         | 0 | 0 | 0 | 9    | 0.15     | 0.107435 | 0.502994 | Unclassified | chr3:145309934-145314949  | 3.016   |
| Igfals        | 0 | 0 | 0 | 168  | 2.8      | 0.036427 | 0.229759 | Unclassified | chr17:25013714-25018953   | 3.24    |
| Cdc42ep2      | 0 | 0 | 0 | 49   | 0.816667 | 0.152043 | 1.104092 | Unclassified | chr19:5917560-5920993     | 1.434   |
| Igfbp3        | 0 | 0 | 0 | 9    | 0.15     | 0.063031 | 1.154834 | Unclassified | chr11:7106095-7115926     | 7.832   |
| Gpr3          | 0 | 0 | 0 | 30   | 0.5      | 0.239056 | 1.492653 | Unclassified | chr4:132765254-132770451  | 3.198   |
| Aldh1a3       | 0 | 0 | 0 | 70   | 1.166667 | 0.101777 | 0.700608 | Unclassified | chr7:73535778-73574363    | 36.586  |
| Milt10        | 0 | 0 | 0 | 2652 | 44.2     | 6.79367  | 2.640164 | Elongating   | chr2:17974897-18134017    | 157.121 |
| Usp51         | 0 | 0 | 0 | 50   | 0.833333 | 1.62686  | 0.306272 | Unclassified | chrX:149439011-149444000  | 2.99    |
| Milt4         | 0 | 0 | 0 | 132  | 2.2      | 0.508367 | 4.367145 | Unclassified | chr17:13895547-14042801   | 145.255 |
| Olfr498       | 0 | 0 | 0 | 3    | 0.05     | 0.051627 | 1        | Unclassified | chr7:115606839-115609832  | 0.994   |
| Olfr47        | 0 | 0 | 0 | 1    | 0.016667 | 0        | 0        | Unclassified | chr6:43183608-43186574    | 0.967   |
| Rasa2         | 0 | 0 | 0 | 1499 | 24.98333 | 7.45722  | 21.79406 | Unclassified | chr9:96439718-96533922    | 92.205  |
| Dus3l         | 0 | 0 | 0 | 504  | 8.4      | 19.257   | 6.922026 | Unclassified | chr17:56902173-56909515   | 5.343   |
| Epyc          | 0 | 0 | 0 | 11   | 0.183333 | 0.104137 | 0        | Unclassified | chr10:97104701-97144534   | 37.834  |
| Dsg2          | 0 | 0 | 0 | 44   | 0.733333 | 0.071587 | 2.72215  | Unclassified | chr18:20714616-20763027   | 46.412  |
| Dsg1a         | 0 | 0 | 0 | 8    | 0.133333 | 0.008691 | 0.818097 | Unclassified | chr18:20467373-20501854   | 32.482  |
| Kel           | 0 | 0 | 0 | 14   | 0.233333 | 0.524675 | 1.172328 | Unclassified | chr6:41636328-41656324    | 17.997  |
| Katna1        | 0 | 0 | 0 | 371  | 6.183333 | 6.57005  | 26.24722 | Stalled      | chr10:7443797-7482948     | 37.152  |
| Sh2b2         | 0 | 0 | 0 | 442  | 7.366667 | 4.67012  | 5.79015  | Unclassified | chr5:136694018-136722773  | 26.756  |
| Olfr1449      | 0 | 0 | 0 | 0    | 0        | 0.060762 | 0        | Unclassified | chr19:13007229-13010174   | 0.946   |
| 2700078K21Rik | 0 | 0 | 0 | 610  | 10.16667 | 10.9659  | 19.38254 | Unclassified | chr7:149194457-149248939  | 52.483  |
| Lamc3         | 0 | 0 | 0 | 112  | 1.866667 | 0.11887  | 2.528849 | Unclassified | chr2:31740800-31802055    | 59.256  |
| Ubox5         | 0 | 0 | 0 | 679  | 11.31667 | 3.83066  | 13.76894 | Unclassified | chr2:130415737-130457722  | 39.986  |
| Cck           | 0 | 0 | 0 | 14   | 0.233333 | 0        | 0.6522   | Unclassified | chr9:121398942-121406780  | 5.839   |
| 2700007P21Rik | 0 | 0 | 0 | 266  | 4.433333 | 5.89946  | 16.32465 | Unclassified | chr2:106802685-106816554  | 11.87   |
| Tcp1l1l       | 0 | 0 | 0 | 92   | 1.533333 | 0.450472 | 14.59637 | Stalled      | chr2:104520136-104554319  | 32.184  |
| Hoxd13        | 0 | 0 | 0 | 12   | 0.2      | 0.118765 | 2.668998 | Unclassified | chr2:74504366-74509655    | 3.29    |
| Zdhhc3        | 0 | 0 | 0 | 1301 | 21.68333 | 5.34085  | 16.65076 | Unclassified | chr9:122981427-123024323  | 40.897  |
| 4930579G22Rik | 0 | 0 | 0 | 57   | 0.95     | 5.29244  | 8.225416 | Unclassified | chr5:130382409-130387150  | 2.742   |
| Zg16          | 0 | 0 | 0 | 5    | 0.083333 | 0        | 0.215276 | Unclassified | chr7:134193669-134197491  | 1.823   |
| Serpinb6a     | 0 | 0 | 0 | 44   | 0.733333 | 2.6594   | 2.494654 | Unclassified | chr13:34009788-34029952   | 18.165  |
| Lyz14         | 0 | 0 | 0 | 100  | 1.666667 | 0.051471 | 1.20838  | Unclassified | chr9:121486960-121552684  | 63.725  |
| Serpina3m     | 0 | 0 | 0 | 9    | 0.15     | 0.02566  | 0.465445 | Unclassified | chr12:105623373-105632467 | 7.095   |
| Serpina3n     | 0 | 0 | 0 | 12   | 0.2      | 0.189137 | 0.375816 | Unclassified | chr12:105642917-105652539 | 7.623   |
| Serpina3g     | 0 | 0 | 0 | 437  | 7.283333 | 11.6339  | 1.52593  | Elongating   | chr12:105450753-105480144 | 27.392  |
| Serpina3k     | 0 | 0 | 0 | 4    | 0.066667 | 0        | 0.675851 | Unclassified | chr12:105574695-105583949 | 7.255   |
| Stfa1         | 0 | 0 | 0 | 4    | 0.066667 | 0.061249 | 0.706601 | Unclassified | chr16:36275233-36285457   | 8.225   |
| Syne1         | 0 | 0 | 0 | 540  | 9        | 0        | 47.44693 | Stalled      | chr10:5149833-5326342     | 174.51  |
| Serpinb9e     | 0 | 0 | 0 | 3    | 0.05     | 0.013343 | 0        | Unclassified | chr13:33339478-33352715   | 11.238  |
| Ccna2         | 0 | 0 | 0 | 551  | 9.183333 | 25.5521  | 8.127542 | Unclassified | chr3:36463786-36472918    | 7.133   |
| Olfr510       | 0 | 0 | 0 | 2    | 0.033333 | 0        | 2        | Unclassified | chr7:115808931-115811876  | 0.946   |
| Ccdc42        | 0 | 0 | 0 | 16   | 0.266667 | 0        | 0        | Unclassified | chr11:68398538-68411453   | 10.916  |
| Bcap3l        | 0 | 0 | 0 | 429  | 7.15     | 41.8358  | 33.50529 | Stalled      | chrX:70931521-70963514    | 29.994  |
| Ptpn14        | 0 | 0 | 0 | 286  | 4.766667 | 0.262368 | 1.037179 | Unclassified | chr1:191550146-191700572  | 148.427 |
| Kdm4d         | 0 | 0 | 0 | 445  | 7.416667 | 2.67984  | 33.0705  | Stalled      | chr9:14267024-14306926    | 37.903  |
| Nav3          | 0 | 0 | 0 | 151  | 2.516667 | 0.052701 | 0        | Unclassified | chr10:109120494-109439275 | 316.782 |
| Cadps         | 0 | 0 | 0 | 294  | 4.9      | 0.021056 | 0        | Unclassified | chr14:13205076-13657593   | 450.518 |
| Fbxo9         | 0 | 0 | 0 | 492  | 8.2      | 5.32808  | 35.49216 | Unclassified | chr9:77929305-77958463    | 27.159  |
| Ptgr1         | 0 | 0 | 0 | 69   | 1.15     | 3.06956  | 7.997398 | Unclassified | chr4:58978461-59001950    | 21.49   |
| Ddi1          | 0 | 0 | 0 | 3    | 0.05     | 0.025295 | 0.342538 | Unclassified | chr9:6265027-6268547      | 1.521   |
| Xpo6          | 0 | 0 | 0 | 2057 | 34.28333 | 23.312   | 14.65076 | Unclassified | chr7:133245232-133345922  | 98.691  |
| Gtf2a1l       | 0 | 0 | 0 | 39   | 0.65     | 0.055413 | 2.86142  | Unclassified | chr17:89065999-89114490   | 46.492  |
| Cep97         | 0 | 0 | 0 | 194  | 3.233333 | 1.16268  | 10.84577 | Stalled      | chr16:55900000-55936961   | 34.962  |
| Fblim1        | 0 | 0 | 0 | 156  | 2.6      | 0.794546 | 0        | Unclassified | chr4:141131976-141163967  | 29.992  |
| Eif4enif1     | 0 | 0 | 0 | 1652 | 27.53333 | 20.2914  | 13.91583 | Unclassified | chr11:3100585-3144590     | 42.006  |
| Pogz          | 0 | 0 | 0 | 860  | 14.33333 | 4.1994   | 12.73973 | Unclassified | chr3:94639488-94687487    | 46      |
| Cenpl         | 0 | 0 | 0 | 239  | 3.983333 | 8.79092  | 21.41445 | Stalled      | chr1:162999022-163016472  | 15.451  |
| Hp            | 0 | 0 | 0 | 16   | 0.266667 | 0.781102 | 0.379658 | Unclassified | chr8:112099027-112105072  | 4.046   |
| Usp53         | 0 | 0 | 0 | 556  | 9.266667 | 1.52284  | 108.4074 | Stalled      | chr3:122636518-122689365  | 50.848  |
| Cpxm1         | 0 | 0 | 0 | 25   | 0.416667 | 0.23832  | 0.512361 | Unclassified | chr2:130216511-130225365  | 6.855   |
| Zfp704        | 0 | 0 | 0 | 364  | 6.066667 | 0.176796 | 4.465391 | Unclassified | chr3:9427009-9612085      | 183.077 |

|               |   |        |   |      |          |          |          |              |                           |         |
|---------------|---|--------|---|------|----------|----------|----------|--------------|---------------------------|---------|
| Gas8          | 0 | 0      | 0 | 171  | 2.85     | 7.28505  | 6.112234 | Unclassified | chr8:126040734-126060550  | 17.817  |
| Serpinb9g     | 0 | 0      | 0 | 4    | 0.066667 | 0.028011 | 1.6724   | Unclassified | chr13:33574658-33587867   | 11.21   |
| 9030418K01Rik | 0 | 0      | 0 | 11   | 0.183333 | 0.096236 | 1.945557 | Unclassified | chr2:178147238-178156886  | 7.629   |
| Bri3bp        | 0 | 0      | 0 | 609  | 10.15    | 11.1459  | 7.123472 | Unclassified | chr5:125919937-125941255  | 19.319  |
| Elttd1        | 0 | 0      | 0 | 66   | 1.1      | 0.059306 | 1.255324 | Unclassified | chr3:151098845-151208045  | 107.201 |
| 4930430F08Rik | 0 | 0      | 0 | 69   | 1.15     | 3.24977  | 14.17448 | Stalled      | chr10:100034907-100053893 | 16.987  |
| Git25d2       | 0 | 0      | 0 | 95   | 1.583333 | 0.278135 | 1.104758 | Unclassified | chr1:154244996-154357824  | 110.829 |
| Mycl1         | 0 | 0      | 0 | 28   | 0.466667 | 1.20309  | 1.756949 | Unclassified | chr4:122671341-122679723  | 6.383   |
| Tex21         | 0 | 0      | 0 | 43   | 0.716667 | 0.038837 | 0.528397 | Unclassified | chr12:77299676-77349733   | 48.058  |
| Lmx1b         | 0 | 0      | 0 | 158  | 2.633333 | 0.094624 | 1.321314 | Unclassified | chr2:33420055-33498031    | 75.977  |
| Lmo4          | 0 | 0      | 0 | 643  | 10.71667 | 15.0927  | 21.56913 | Unclassified | chr3:143851494-143870219  | 16.726  |
| Brs3          | 0 | 0      | 0 | 5    | 0.083333 | 0.018494 | 0        | Unclassified | chrX:54294250-54301935    | 5.686   |
| Ptplad1       | 0 | 0      | 0 | 795  | 13.25    | 12.3998  | 19.48873 | Unclassified | chr9:64834789-64871524    | 34.736  |
| Ndst3         | 0 | 0      | 0 | 93   | 1.55     | 0.043217 | 0.612187 | Unclassified | chr3:123229083-123377310  | 146.228 |
| Akr1c18       | 0 | 0      | 0 | 15   | 0.25     | 0        | 1.758877 | Unclassified | chr13:4131872-4151877     | 18.006  |
| Fam196a       | 0 | 0      | 0 | 59   | 0.983333 | 0.055279 | 0.506957 | Unclassified | chr7:142073590-142132113  | 56.524  |
| Defb42        | 0 | 0      | 0 | 0    | 0        | 0        | 0        | Unclassified | chr14:63663827-63667437   | 1.611   |
| Fam135b       | 0 | 0      | 0 | 133  | 2.216667 | 0.005545 | 1.367646 | Unclassified | chr15:71276107-71560268   | 282.162 |
| Lman1         | 0 | 0      | 0 | 490  | 8.166667 | 23.4089  | 11.61587 | Unclassified | chr18:66140407-66164266   | 21.86   |
| Bag5          | 0 | 0      | 0 | 406  | 6.766667 | 10.7141  | 11.89297 | Unclassified | chr12:112948068-112953468 | 3.401   |
| Acn9          | 0 | 0      | 0 | 236  | 3.933333 | 11.4628  | 66.3536  | Stalled      | chr6:6904017-6989220      | 83.204  |
| Mrps6         | 0 | 0      | 0 | 810  | 13.5     | 0        | 34.67929 | Unclassified | chr16:92056580-92112472   | 53.893  |
| 38963         | 0 | 0      | 0 | 128  | 2.133333 | 0.28593  | 0        | Unclassified | chr11:87392632-87404041   | 9.41    |
| Pnp1          | 0 | 0      | 0 | 240  | 4        | 15.6309  | 31.50672 | Stalled      | chr14:51561977-51573087   | 9.111   |
| 38964         | 0 | 0      | 0 | 45   | 0.75     | 0        | 1.63973  | Unclassified | chr16:18621903-18632031   | 8.129   |
| H2-M10.1      | 0 | 0      | 0 | 3    | 0.05     | 0.036961 | 0        | Unclassified | chr17:36459804-36465095   | 3.292   |
| Kcnh1         | 0 | 0      | 0 | 347  | 5.783333 | 0.068964 | 2.417544 | Unclassified | chr1:194012753-194334040  | 319.288 |
| F830045P16Rik | 0 | 0      | 0 | 58   | 0.966667 | 0.033289 | 1.765667 | Unclassified | chr2:129284094-129364338  | 78.245  |
| Hnf1a         | 0 | 0      | 0 | 160  | 2.666667 | 0.084477 | 0.117079 | Unclassified | chr5:115398988-115423071  | 22.084  |
| Tcf12         | 0 | 0      | 0 | 1645 | 27.41667 | 7.26078  | 21.9601  | Unclassified | chr9:71692058-71961626    | 267.569 |
| Clec12b       | 0 | 0      | 0 | 7    | 0.116667 | 0.016853 | 1.285204 | Unclassified | chr6:129325532-129337521  | 9.99    |
| Tcea2         | 0 | 0      | 0 | 390  | 6.5      | 3.34857  | 3.320562 | Unclassified | chr2:181413014-181442756  | 7.743   |
| Tcea3         | 0 | 0      | 0 | 70   | 1.166667 | 0.708878 | 1.750135 | Unclassified | chr4:135801871-135830814  | 26.944  |
| Abhd10        | 0 | 0      | 0 | 320  | 5.333333 | 2.988    | 17.95386 | Unclassified | chr16:45730509-45745019   | 12.511  |
| Dsg1c         | 0 | 0      | 0 | 7    | 0.116667 | 0.004423 | 0        | Unclassified | chr18:20403840-20442424   | 36.585  |
| Prok1         | 0 | 0      | 0 | 3    | 0.05     | 0        | 0.760651 | Unclassified | chr3:107038448-107044625  | 4.178   |
| I8300120I6Rik | 0 | 0      | 0 | 3    | 0.05     | 0.225471 | 0.68973  | Unclassified | chr19:34680446-34687891   | 5.446   |
| Trpc1         | 0 | 0      | 0 | 43   | 0.716667 | 0.72762  | 6.552829 | Unclassified | chr9:95607047-95652777    | 43.731  |
| Rgs1          | 0 | 0      | 0 | 36   | 0.6      | 1.19554  | 6.393272 | Unclassified | chr1:146091799-146098234  | 4.436   |
| Cpeb4         | 0 | 0      | 0 | 280  | 4.666667 | 4.45658  | 2.5012   | Unclassified | chr11:31770210-31831577   | 59.368  |
| Alg13         | 0 | 0      | 0 | 130  | 2.166667 | 0.911923 | 25.46391 | Stalled      | chrX:140750508-140759740  | 7.233   |
| Rgs6          | 0 | 0      | 0 | 393  | 6.55     | 0.021957 | 1.160742 | Unclassified | chr12:83716024-84259799   | 541.776 |
| Loxl4         | 0 | 0      | 0 | 194  | 3.233333 | 0.214526 | 1.71539  | Elongating   | chr19:42666769-42689296   | 20.528  |
| Cxcr1         | 0 | 0      | 0 | 5    | 0.083333 | 0        | 2.595012 | Unclassified | chr1:74238359-74243205    | 2.847   |
| Snx10         | 0 | 0      | 0 | 450  | 7.5      | 3.25886  | 2.006094 | Unclassified | chr6:51471901-51540669    | 66.769  |
| Asb5          | 0 | 0      | 0 | 43   | 0.716667 | 0.0487   | 0.954344 | Unclassified | chr8:55633683-55673189    | 37.507  |
| Esco2         | 0 | 0      | 0 | 271  | 4.516667 | 4.82706  | 32.16118 | Stalled      | chr14:66437863-66454806   | 14.944  |
| Rpusd4        | 0 | 0      | 0 | 486  | 8.1      | 13.6688  | 23.00327 | Unclassified | chr9:35073465-35083542    | 8.078   |
| Rhoj          | 0 | 0      | 0 | 68   | 1.133333 | 0.135881 | 0        | Unclassified | chr12:76407299-76502442   | 93.144  |
| Gm14124       | 0 | 0      | 0 | 3    | 0.05     | 0.024446 | 0        | Unclassified | chr2:150081252-150096036  | 12.785  |
| Chn1          | 0 | 0      | 0 | 125  | 2.083333 | 0.341653 | 2.332668 | Unclassified | chr2:73448716-73615403    | 164.688 |
| Tm2d3         | 0 | 0      | 0 | 292  | 4.866667 | 16.1368  | 17.48145 | Unclassified | chr7:72836302-72846799    | 8.498   |
| Krtap5-4      | 0 | 0      | 0 | 2    | 0.033333 | 0        | 2        | Unclassified | chr7:149487406-149490408  | 1.003   |
| Cryl1         | 0 | 0      | 0 | 530  | 8.833333 | 5.26111  | 44.14556 | Stalled      | chr14:57893870-58019320   | 123.451 |
| Myct1         | 0 | 0      | 0 | 10   | 0.166667 | 0.050767 | 0.667829 | Unclassified | chr10:4739751-4754813     | 13.063  |
| Fgf9          | 0 | 0      | 0 | 53   | 0.883333 | 0.142472 | 2.350515 | Unclassified | chr14:58689522-58731556   | 40.035  |
| Fgfr2         | 0 | 0      | 0 | 109  | 1.816667 | 0.060703 | 1.984248 | Unclassified | chr7:137305964-137412322  | 104.359 |
| Fgfr3         | 0 | 0      | 0 | 72   | 1.2      | 0.229887 | 1.084509 | Unclassified | chr5:34062372-34079712    | 15.341  |
| Akr1b8        | 0 | 0      | 0 | 13   | 0.216667 | 0.172798 | 1.094352 | Unclassified | chr6:34302163-34318454    | 14.292  |
| Fgfr4         | 0 | 0      | 0 | 30   | 0.5      | 0.032591 | 1.459883 | Unclassified | chr13:55252178-55270120   | 15.943  |
| Rab13         | 0 | 0      | 0 | 22   | 0.366667 | 1.4001   | 1.541243 | Unclassified | chr3:90022738-90029885    | 5.148   |
| Vmn2r53       | 0 | 0      | 0 | 10   | 0.166667 | 0.012765 | 0        | Unclassified | chr7:13166818-13193893    | 25.076  |
| Gcap14        | 0 | 81.827 | 0 | 594  | 9.9      | 2.96309  | 26.58132 | Stalled      | chr14:37688121-37783950   | 93.83   |
| B3gat3        | 0 | 0      | 0 | 325  | 5.416667 | 22.8848  | 12.41793 | Unclassified | chr19:8992882-9001726     | 6.845   |
| Arap3         | 0 | 0      | 0 | 44   | 0.733333 | 0.090757 | 0.726366 | Unclassified | chr18:38132276-38159228   | 24.953  |
| 0610007P22Rik | 0 | 0      | 0 | 160  | 2.666667 | 16.0591  | 8.267655 | Unclassified | chr17:25375114-25379743   | 2.63    |
| Klk13         | 0 | 0      | 0 | 18   | 0.3      | 0        | 1.455485 | Unclassified | chr7:50965936-50982128    | 14.193  |
| Clec3a        | 0 | 0      | 0 | 10   | 0.166667 | 0        | 0.982706 | Unclassified | chr8:116939985-116949746  | 7.762   |
| 5730559C18Rik | 0 | 0      | 0 | 35   | 0.583333 | 0.525311 | 5.079794 | Unclassified | chr1:138110107-138132841  | 20.735  |
| Pri8a9        | 0 | 0      | 0 | 1    | 0.016667 | 0        | 0        | Unclassified | chr13:27649869-27658473   | 6.605   |
| Nanp          | 0 | 0      | 0 | 312  | 5.2      | 3.22868  | 33.8397  | Stalled      | chr2:150855421-150867115  | 9.695   |
| 1700022I11Rik | 0 | 0      | 0 | 38   | 0.633333 | 0.055243 | 0.50454  | Unclassified | chr4:42980831-42987197    | 4.367   |
| Ceacam12      | 0 | 0      | 0 | 5    | 0.083333 | 0.08691  | 1.239062 | Unclassified | chr7:18649277-18657161    | 5.885   |
| Omg           | 0 | 0      | 0 | 16   | 0.266667 | 0.069091 | 0.83231  | Unclassified | chr11:79314483-79319584   | 3.102   |
| Olfir8        | 0 | 0      | 0 | 0    | 0        | 0        | 0        | Unclassified | chr10:78415951-78418884   | 0.934   |
| Olfir9        | 0 | 0      | 0 | 1    | 0.016667 | 0.088605 | 1        | Unclassified | chr10:128424969-128427908 | 0.94    |
| Gas1          | 0 | 0      | 0 | 5    | 0.083333 | 0.061401 | 0        | Unclassified | chr13:60275765-60280896   | 3.132   |
| BC027231      | 0 | 0      | 0 | 731  | 12.18333 | 4.4787   | 19.33919 | Unclassified | chr16:44722411-44737243   | 12.833  |
| 1700110M21Rik | 0 | 0      | 0 | 2    | 0.033333 | 0.013766 | 0.580008 | Unclassified | chr14:101596906-101601286 | 2.381   |
| Gast          | 0 | 0      | 0 | 11   | 0.183333 | 0.084503 | 1.045347 | Unclassified | chr11:100193725-100198310 | 2.586   |
| Rspo2         | 0 | 0      | 0 | 75   | 1.25     | 0.049884 | 4.828955 | Unclassified | chr15:42852340-43004364   | 150.025 |
| Ndn           | 0 | 0      | 0 | 4    | 0.066667 | 0.077628 | 0.789346 | Unclassified | chr7:69491162-69494813    | 1.652   |
| Ndp           | 0 | 0      | 0 | 6    | 0.1      | 0        | 0        | Unclassified | chrX:16462647-16490890    | 26.244  |
| Hyal1         | 0 | 0      | 0 | 28   | 0.466667 | 0.117851 | 1.150234 | Unclassified | chr9:107477282-107482464  | 3.183   |
| I120ra        | 0 | 0      | 0 | 37   | 0.616667 | 0.141176 | 3.599009 | Unclassified | chr10:19430392-19479859   | 47.468  |
| I122ra2       | 0 | 0      | 0 | 25   | 0.416667 | 0.025965 | 1.472753 | Unclassified | chr10:19339833-19354487   | 12.655  |



|               |   |   |   |      |          |          |          |              |                           |          |
|---------------|---|---|---|------|----------|----------|----------|--------------|---------------------------|----------|
| Tpte          | 0 | 0 | 0 | 134  | 2.233333 | 0.05028  | 0.798049 | Unclassified | chr8:23391912-23481890    | 87.979   |
| Isg2012       | 0 | 0 | 0 | 613  | 10.21667 | 11.1848  | 11.49952 | Unclassified | chr3:87732235-87744608    | 10.374   |
| BC023814      | 0 | 0 | 0 | 599  | 9.983333 | 9.05165  | 8.457495 | Unclassified | chr3:87726524-87736117    | 7.594    |
| Olf1385       | 0 | 0 | 0 | 0    | 0        | 0.08464  | 0        | Unclassified | chr11:49306036-49308966   | 0.931    |
| Olf1211       | 0 | 0 | 0 | 3    | 0.05     | 0        | 2        | Unclassified | chr2:88769534-88772470    | 0.937    |
| Cntnap4       | 0 | 0 | 0 | 192  | 3.2      | 0.042281 | 0        | Unclassified | chr8:115091942-115406607  | 312.666  |
| Zdhhc22       | 0 | 0 | 0 | 17   | 0.283333 | 0.097093 | 0.222677 | Unclassified | chr12:88324330-88331626   | 5.297    |
| Erb4          | 0 | 0 | 0 | 417  | 6.95     | 0.027096 | 2.165818 | Unclassified | chr1:68086539-69156633    | 1068.095 |
| Olf1213       | 0 | 0 | 0 | 1    | 0.016667 | 0.032515 | 0        | Unclassified | chr6:116488472-116491456  | 0.985    |
| Erb3          | 0 | 0 | 0 | 86   | 1.433333 | 1.09973  | 2.171101 | Unclassified | chr10:128006423-128028557 | 20.135   |
| Erb2          | 0 | 0 | 0 | 110  | 1.833333 | 0.179531 | 1.354568 | Unclassified | chr11:98271797-98299030   | 25.234   |
| Nr2f1         | 0 | 0 | 0 | 30   | 0.5      | 0.229409 | 0.545851 | Unclassified | chr13:78328235-78340243   | 10.009   |
| Lcn5          | 0 | 0 | 0 | 4    | 0.066667 | 0.055322 | 1.532383 | Unclassified | chr2:25511474-25517750    | 4.277    |
| Gm7534        | 0 | 0 | 0 | 24   | 0.4      | 0.0822   | 1.647232 | Unclassified | chr4:133746718-133760919  | 12.202   |
| Epx           | 0 | 0 | 0 | 37   | 0.616667 | 0.052389 | 0.253731 | Unclassified | chr11:87677499-87691038   | 11.54    |
| Eps8          | 0 | 0 | 0 | 1528 | 25.46667 | 1.85121  | 5.451702 | Unclassified | chr6:137425765-137599641  | 171.877  |
| AU021034      | 0 | 0 | 0 | 4    | 0.066667 | 0.108807 | 0        | Unclassified | chr14:78480830-78490814   | 7.985    |
| Dusp26        | 0 | 0 | 0 | 17   | 0.283333 | 0.242094 | 0.626576 | Unclassified | chr8:32198133-32207519    | 7.387    |
| Gm410         | 0 | 0 | 0 | 47   | 0.783333 | 0.152807 | 0        | Unclassified | chr3:57471343-57498459    | 25.117   |
| Sp7           | 0 | 0 | 0 | 20   | 0.333333 | 0.29179  | 0.335989 | Unclassified | chr15:102187607-102198702 | 9.096    |
| Nms           | 0 | 0 | 0 | 11   | 0.183333 | 0.076821 | 0.558718 | Unclassified | chr1:3893993-39007121     | 11.129   |
| AU022252      | 0 | 0 | 0 | 235  | 3.916667 | 5.4941   | 19.67395 | Stalled      | chr4:118897743-118907329  | 7.587    |
| I128a         | 0 | 0 | 0 | 2    | 0.033333 | 0.065907 | 1        | Unclassified | chr7:29293879-29297379    | 1.501    |
| Serpinb11     | 0 | 0 | 0 | 13   | 0.216667 | 0.02263  | 0        | Unclassified | chr1:109256890-109277052  | 18.163   |
| Ptprq         | 0 | 0 | 0 | 86   | 1.433333 | 0.023606 | 0        | Unclassified | chr10:106954415-107159083 | 202.669  |
| Fam188b       | 0 | 0 | 0 | 152  | 2.533333 | 0.177849 | 1.776423 | Unclassified | chr6:55151376-55270216    | 116.841  |
| Nlrp9c        | 0 | 0 | 0 | 11   | 0.183333 | 0.012731 | 0        | Unclassified | chr7:27149905-27181262    | 29.358   |
| Cx3cr1        | 0 | 0 | 0 | 65   | 1.083333 | 0.042958 | 0.709661 | Unclassified | chr9:119957810-119979400  | 19.591   |
| Tmem17        | 0 | 0 | 0 | 151  | 2.516667 | 2.78752  | 24.08617 | Stalled      | chr11:22410285-22419234   | 6.95     |
| Tubg2         | 0 | 0 | 0 | 47   | 0.783333 | 3.88635  | 9.558853 | Unclassified | chr11:101015197-101023100 | 5.904    |
| Fez1          | 0 | 0 | 0 | 17   | 0.283333 | 0.029921 | 0.679891 | Unclassified | chr9:36649243-36686225    | 34.983   |
| Zfp598        | 0 | 0 | 0 | 378  | 6.3      | 16.5974  | 15.5181  | Unclassified | chr17:24804696-24818961   | 12.266   |
| Fmrip3        | 0 | 0 | 0 | 2    | 0.033333 | 0.024482 | 0        | Unclassified | chrX:136914509-136929079  | 12.571   |
| Dtd1          | 0 | 0 | 0 | 611  | 10.18333 | 11.7161  | 32.58697 | Stalled      | chr2:144423688-144594483  | 168.796  |
| Mrpl54        | 0 | 0 | 0 | 276  | 4.6      | 85.4252  | 2.577964 | Elongating   | chr10:80727466-80731671   | 2.206    |
| Sostdc1       | 0 | 0 | 0 | 20   | 0.333333 | 3.74694  | 0.485827 | Unclassified | chr12:37038755-37045039   | 4.285    |
| Nalcn         | 0 | 0 | 0 | 134  | 2.233333 | 0.025218 | 2.915548 | Unclassified | chr14:123675862-124028366 | 350.505  |
| Tmem93        | 0 | 0 | 0 | 332  | 5.533333 | 32.8706  | 14.93386 | Unclassified | chr11:72989006-72992544   | 1.539    |
| I128b         | 0 | 0 | 0 | 1    | 0.016667 | 0.087316 | 0        | Unclassified | chr7:29305854-29309341    | 1.488    |
| Atp6v1g3      | 0 | 0 | 0 | 25   | 0.416667 | 0.03396  | 0.380261 | Unclassified | chr1:140168314-140186039  | 15.726   |
| Got111        | 0 | 0 | 0 | 11   | 0.183333 | 0.047258 | 1.106402 | Unclassified | chr8:28307930-28315019    | 5.09     |
| Gpr82         | 0 | 0 | 0 | 6    | 0.1      | 0.046194 | 0.503574 | Unclassified | chrX:13236488-13244559    | 6.072    |
| Ccne1         | 0 | 0 | 0 | 580  | 9.666667 | 18.7114  | 11.35804 | Unclassified | chr7:38883002-38894509    | 9.508    |
| Ccnd3         | 0 | 0 | 0 | 642  | 10.7     | 76.474   | 2.075662 | Elongating   | chr17:47728415-47736637   | 6.223    |
| Ccnb2         | 0 | 0 | 0 | 378  | 6.3      | 20.9485  | 8.488106 | Unclassified | chr9:70255495-70271361    | 13.867   |
| Tbc1d23       | 0 | 0 | 0 | 465  | 7.75     | 2.56258  | 16.8859  | Unclassified | chr16:57168976-57233579   | 62.604   |
| Micall1       | 0 | 0 | 0 | 718  | 11.96667 | 5.92232  | 8.152696 | Unclassified | chr15:78937412-78967331   | 27.92    |
| Efcab9        | 0 | 0 | 0 | 32   | 0.533333 | 0        | 1.128256 | Unclassified | chr11:32422732-32429574   | 4.843    |
| Klrk1         | 0 | 0 | 0 | 8    | 0.133333 | 0.036487 | 0.64143  | Unclassified | chr6:129560338-129575859  | 13.522   |
| 953008L14Rik  | 0 | 0 | 0 | 410  | 6.833333 | 0.036768 | 0.854403 | Unclassified | chr13:41858516-41944985   | 84.47    |
| Cdc42         | 0 | 0 | 0 | 1207 | 20.11667 | 71.7982  | 12.06581 | Unclassified | chr4:136875610-136915652  | 38.043   |
| Bag2          | 0 | 0 | 0 | 229  | 3.816667 | 5.96624  | 6.958153 | Unclassified | chr1:33802328-33816595    | 12.268   |
| Fbxw11        | 0 | 0 | 0 | 1285 | 21.41667 | 7.06284  | 18.71756 | Unclassified | chr11:32540874-32646814   | 103.941  |
| Ptpla         | 0 | 0 | 0 | 99   | 1.65     | 3.56882  | 12.10772 | Stalled      | chr2:13948457-13979662    | 29.206   |
| Zfp532        | 0 | 0 | 0 | 181  | 3.016667 | 0.059026 | 1.523921 | Unclassified | chr18:65737883-65848587   | 108.705  |
| Spink10       | 0 | 0 | 0 | 383  | 6.833333 | 2.26968  | 123.108  | Stalled      | chr18:62706564-62821042   | 112.479  |
| Fam20b        | 0 | 0 | 0 | 328  | 5.466667 | 6.3833   | 13.29382 | Unclassified | chr1:158608701-158651041  | 40.341   |
| Olf1354       | 0 | 0 | 0 | 4    | 0.066667 | 0        | 1        | Unclassified | chr2:36760467-36763421    | 0.955    |
| Cox5a         | 0 | 0 | 0 | 552  | 9.2      | 103.598  | 24.12223 | Unclassified | chr9:57367038-57380233    | 11.196   |
| Marveld3      | 0 | 0 | 0 | 40   | 0.666667 | 1.15317  | 1.436054 | Unclassified | chr8:112471809-112488105  | 14.297   |
| Olf1352       | 0 | 0 | 0 | 1    | 0.016667 | 0        | 0        | Unclassified | chr2:36723087-36726035    | 0.949    |
| Yipf7         | 0 | 0 | 0 | 11   | 0.183333 | 0.032148 | 0        | Unclassified | chr5:69907916-69935871    | 25.956   |
| Steap2        | 0 | 0 | 0 | 18   | 0.3      | 0.035467 | 0        | Unclassified | chr5:5664830-5696568      | 29.739   |
| Grip1         | 0 | 0 | 0 | 577  | 9.616667 | 0.085234 | 2.087994 | Unclassified | chr10:118889369-119512649 | 621.281  |
| Olf1353       | 0 | 0 | 0 | 3    | 0.05     | 0        | 2        | Unclassified | chr2:36745430-36748366    | 0.937    |
| P1ce1         | 0 | 0 | 0 | 247  | 4.116667 | 0.052565 | 1.033615 | Unclassified | chr19:38596686-38859590   | 260.905  |
| 4931406B18Rik | 0 | 0 | 0 | 21   | 0.35     | 0.087164 | 0.834801 | Unclassified | chr7:50747413-50763308    | 13.896   |
| Olf1351       | 0 | 0 | 0 | 2    | 0.033333 | 0.08242  | 0        | Unclassified | chr2:36714933-36717866    | 0.934    |
| Olf1467       | 0 | 0 | 0 | 1    | 0.016667 | 0        | 1        | Unclassified | chr7:114956099-114959020  | 0.922    |
| Olf1347       | 0 | 0 | 0 | 1    | 0.016667 | 0.049368 | 1        | Unclassified | chr2:36587842-36590781    | 0.94     |
| Fgfbp3        | 0 | 0 | 0 | 70   | 1.166667 | 5.37805  | 4.993863 | Unclassified | chr19:36992039-36996089   | 2.051    |
| Pigt          | 0 | 0 | 0 | 519  | 8.65     | 31.1082  | 17.0664  | Unclassified | chr2:164321024-164333801  | 10.778   |
| Gm5878        | 0 | 0 | 0 | 19   | 0.316667 | 0.046887 | 0        | Unclassified | chr6:85061409-85078088    | 14.68    |
| Srd5a1        | 0 | 0 | 0 | 275  | 4.583333 | 4.72604  | 18.12733 | Stalled      | chr13:69712326-69752341   | 38.016   |
| 9130019O22Rik | 0 | 0 | 0 | 104  | 1.733333 | 3.93859  | 7.200173 | Unclassified | chr7:134525773-134532680  | 4.908    |
| D1st          | 0 | 0 | 0 | 900  | 15       | 43.2584  | 11.14412 | Unclassified | chr12:86449782-86475041   | 23.26    |
| Chsy3         | 0 | 0 | 0 | 148  | 2.466667 | 0.165074 | 1.233592 | Unclassified | chr18:59332993-59570990   | 235.998  |
| Tmem55a       | 0 | 0 | 0 | 253  | 4.216667 | 2.99032  | 23.96254 | Stalled      | chr4:14789365-14842407    | 51.043   |
| Znhit3        | 0 | 0 | 0 | 213  | 3.55     | 0        | 5.049566 | Unclassified | chr11:84724456-84731858   | 5.403    |
| Olf1016       | 0 | 0 | 0 | 2    | 0.033333 | 0        | 2        | Unclassified | chr2:85639496-85642425    | 0.93     |
| Fam193a       | 0 | 0 | 0 | 482  | 8.033333 | 7.71184  | 0.974084 | Unclassified | chr5:34761499-34829105    | 65.607   |
| BC023882      | 0 | 0 | 0 | 447  | 7.45     | 7.17839  | 36.68003 | Unclassified | chr5:34496547-34514073    | 15.527   |
| Nmd3          | 0 | 0 | 0 | 810  | 13.5     | 13.1389  | 16.8767  | Unclassified | chr3:69523976-69552968    | 26.993   |
| Olf141        | 0 | 0 | 0 | 0    | 0        | 0        | 0        | Unclassified | chr2:86646177-86649154    | 0.978    |
| Utp14b        | 0 | 0 | 0 | 440  | 7.333333 | 0        | 21.23174 | Unclassified | chr1:78652399-78664175    | 9.777    |
| Olf1671       | 0 | 0 | 0 | 1    | 0.016667 | 0        | 0        | Unclassified | chr7:112123555-112126497  | 0.943    |



|               |   |          |   |      |          |          |          |              |                           |         |
|---------------|---|----------|---|------|----------|----------|----------|--------------|---------------------------|---------|
| Stmn4         | 0 | 0        | 0 | 26   | 0.433333 | 0.031209 | 0.414862 | Unclassified | chr14:66961211-66980517   | 17.307  |
| Tbpl2         | 0 | 0        | 0 | 16   | 0.266667 | 0        | 2.053791 | Unclassified | chr2:23927240-23954115    | 24.876  |
| Anapc7        | 0 | 0        | 0 | 519  | 8.65     | 16.4474  | 7.811883 | Unclassified | chr5:122870452-122894918  | 22.467  |
| Ptp4a2        | 0 | 196.5844 | 0 | 1615 | 26.91667 | 39.7104  | 10.37284 | Unclassified | chr4:129495722-129527247  | 29.526  |
| Keg1          | 0 | 0        | 0 | 19   | 0.316667 | 0.030809 | 0.606361 | Unclassified | chr19:12768279-12794384   | 24.106  |
| Tmsb4x        | 0 | 0        | 0 | 794  | 13.23333 | 552.212  | 2.447508 | Elongating   | chrX:163645025-163649150  | 2.126   |
| Tmsb10        | 0 | 0        | 0 | 348  | 5.8      | 560.974  | 317      | Unclassified | chr6:72907346-72910393    | 1.048   |
| Parp11        | 0 | 0        | 0 | 759  | 12.65    | 3.84889  | 24.53031 | Unclassified | chr6:127401740-127444257  | 40.518  |
| Hist1h1t      | 0 | 0        | 0 | 7    | 0.116667 | 0.213685 | 2        | Unclassified | chr13:23785679-23788591   | 0.913   |
| Fxyd7         | 0 | 0        | 0 | 30   | 0.5      | 0.378063 | 0.227269 | Unclassified | chr7:31827533-31838473    | 8.941   |
| Cd200r1       | 0 | 0        | 0 | 33   | 0.55     | 1.22633  | 1.533751 | Unclassified | chr16:44763848-44795090   | 29.243  |
| Ptpn13        | 0 | 0        | 0 | 187  | 3.116667 | 0.102091 | 3.94468  | Unclassified | chr5:103852210-104027380  | 173.171 |
| Ptpn12        | 0 | 0        | 0 | 410  | 6.833333 | 2.39481  | 28.52517 | Stalled      | chr5:20492462-20563615    | 69.154  |
| Bcl2l2        | 0 | 0        | 0 | 155  | 2.583333 | 7.049    | 6.372798 | Unclassified | chr14:55500261-55507071   | 4.811   |
| Gm5941        | 0 | 0        | 0 | 2    | 0.033333 | 0        | 2        | Unclassified | chrX:89733287-89736018    | 0.732   |
| Bcl7b         | 0 | 0        | 0 | 914  | 15.23333 | 16.5578  | 12.02837 | Unclassified | chr5:135642241-135657722  | 13.482  |
| Olfr639       | 0 | 0        | 0 | 2    | 0.033333 | 0        | 1        | Unclassified | chr7:111160263-111163214  | 0.952   |
| Olfr571       | 0 | 0        | 0 | 1    | 0.016667 | 0        | 1        | Unclassified | chr7:110057382-110060351  | 0.97    |
| Olfr609       | 0 | 0        | 0 | 0    | 0        | 0        | 0        | Unclassified | chr7:110640432-110643390  | 0.959   |
| Olfr622       | 0 | 0        | 0 | 3    | 0.05     | 0        | 1        | Unclassified | chr7:110787698-110790652  | 0.955   |
| Olfr615       | 0 | 0        | 0 | 3    | 0.05     | 0        | 1        | Unclassified | chr7:110706992-110709934  | 0.943   |
| Olfr610       | 0 | 0        | 0 | 0    | 0        | 0        | 0        | Unclassified | chr7:110654511-110657458  | 0.948   |
| Olfr1062      | 0 | 0        | 0 | 0    | 0        | 0.027161 | 0        | Unclassified | chr2:86262875-86265831    | 0.957   |
| Olfr547       | 0 | 0        | 0 | 2    | 0.033333 | 0.074876 | 2        | Unclassified | chr7:109681262-109684202  | 0.941   |
| Olfr619       | 0 | 0        | 0 | 0    | 0        | 0.022866 | 0        | Unclassified | chr7:110750102-110753223  | 1.122   |
| Olfr643       | 0 | 0        | 0 | 1    | 0.016667 | 0.027125 | 0        | Unclassified | chr7:111207169-111210114  | 0.946   |
| Gm13043       | 0 | 0        | 0 | 0    | 0        | 0        | 0        | Unclassified | chr4:143099245-143107734  | 6.49    |
| AA986860      | 0 | 0        | 0 | 61   | 1.016667 | 0.215759 | 2.538627 | Unclassified | chr1:132626552-132641199  | 12.648  |
| Psg27         | 0 | 0        | 0 | 12   | 0.2      | 0        | 0        | Unclassified | chr7:19141862-19154654    | 10.793  |
| Ralgapa1      | 0 | 0        | 0 | 1024 | 17.06667 | 4.01598  | 28.61877 | Stalled      | chr12:56703885-56924154   | 218.27  |
| Ascl3         | 0 | 0        | 0 | 13   | 0.216667 | 0        | 0.705362 | Unclassified | chr7:116870978-116877246  | 4.269   |
| Tmem9b        | 0 | 0        | 0 | 315  | 5.25     | 8.38914  | 40.30464 | Stalled      | chr7:116879349-116897777  | 16.429  |
| Scube2        | 0 | 0        | 0 | 115  | 1.916667 | 0.05244  | 2.262644 | Unclassified | chr7:116942204-117011193  | 66.99   |
| Spag4         | 0 | 0        | 0 | 156  | 2.6      | 4.93957  | 12.75776 | Stalled      | chr2:155888948-155895235  | 4.288   |
| Cxcl2         | 0 | 0        | 0 | 11   | 0.183333 | 0.325035 | 2.55022  | Unclassified | chr5:91330924-91334964    | 2.041   |
| Ift52         | 0 | 0        | 0 | 397  | 6.616667 | 6.79887  | 22.62417 | Unclassified | chr2:162841207-162871871  | 28.665  |
| Olfm1         | 0 | 0        | 0 | 15   | 0.25     | 0        | 0.638226 | Unclassified | chr7:114708946-114734879  | 23.934  |
| Ovch2         | 0 | 0        | 0 | 15   | 0.25     | 0.099919 | 0.571039 | Unclassified | chr7:114925057-114946693  | 19.637  |
| Ptms          | 0 | 0        | 0 | 133  | 2.216667 | 43.901   | 2.991334 | Elongating   | chr6:124863692-124869964  | 4.273   |
| Phf1          | 0 | 0        | 0 | 193  | 3.216667 | 6.06109  | 3.218739 | Unclassified | chr17:27068071-27074835   | 4.765   |
| Tjp2          | 0 | 0        | 0 | 546  | 9.1      | 2.87913  | 6.140557 | Unclassified | chr19:24168991-24301444   | 130.454 |
| Tjp1          | 0 | 0        | 0 | 70   | 1.166667 | 0.07632  | 1.609502 | Unclassified | chr7:72441051-72518130    | 75.08   |
| Map4k3        | 0 | 0        | 0 | 428  | 7.133333 | 0.439226 | 11.69139 | Stalled      | chr17:80979851-81129433   | 147.583 |
| Tmem149       | 0 | 0        | 0 | 161  | 2.683333 | 2.95013  | 0.163893 | Unclassified | chr7:31348445-31352981    | 2.537   |
| Vamp3         | 0 | 0        | 0 | 458  | 7.633333 | 12.0187  | 21.71527 | Unclassified | chr4:150421413-150434062  | 21.65   |
| Adal          | 0 | 0        | 0 | 58   | 0.966667 | 1.06741  | 1.789128 | Unclassified | chr2:120965876-120982414  | 14.539  |
| Nyx           | 0 | 0        | 0 | 15   | 0.25     | 0.040699 | 1.22718  | Unclassified | chrX:13042797-13066439    | 21.643  |
| Olfr455       | 0 | 0        | 0 | 4    | 0.066667 | 0        | 2        | Unclassified | chr6:42488066-42491019    | 0.954   |
| Cd164i2       | 0 | 0        | 0 | 7    | 0.116667 | 0.090988 | 2.932479 | Unclassified | chr4:132774723-132780469  | 3.747   |
| C4bp          | 0 | 0        | 0 | 19   | 0.316667 | 0.33351  | 0.578444 | Unclassified | chr1:132532497-132560195  | 25.699  |
| Fam26d        | 0 | 0        | 0 | 7    | 0.116667 | 0.034508 | 0.430254 | Unclassified | chr10:33758589-33766119   | 5.531   |
| Gpr88         | 0 | 0        | 0 | 10   | 0.166667 | 0.271186 | 0.82904  | Unclassified | chr3:115952571-115958402  | 3.832   |
| 4933405020Rik | 0 | 0        | 0 | 4    | 0.066667 | 0.028715 | 0.290598 | Unclassified | chr7:57852559-57855898    | 1.34    |
| Tas2r119      | 0 | 0        | 0 | 2    | 0.033333 | 0.05096  | 0        | Unclassified | chr15:32105043-32108049   | 1.007   |
| Rhox3c        | 0 | 0        | 0 | 0    | 0        | 0        | 0        | Unclassified | chrX:34882503-34888467    | 3.965   |
| Vav3          | 0 | 0        | 0 | 771  | 12.85    | 1.72234  | 14.34728 | Stalled      | chr3:109141600-109488612  | 345.013 |
| Olfr653       | 0 | 0        | 0 | 3    | 0.05     | 0        | 1        | Unclassified | chr7:111726137-111729182  | 1.046   |
| Olfr870       | 0 | 0        | 0 | 1    | 0.016667 | 0        | 0        | Unclassified | chr9:19975077-19978013    | 0.937   |
| Olfr681       | 0 | 0        | 0 | 0    | 0        | 0.020231 | 0        | Unclassified | chr7:112267972-112270918  | 0.947   |
| Olfr750       | 0 | 0        | 0 | 3    | 0.05     | 0.180149 | 3        | Unclassified | chr14:51689985-51693117   | 1.133   |
| Olfr403       | 0 | 0        | 0 | 0    | 0        | 0.035541 | 0        | Unclassified | chr11:74007006-74009948   | 0.943   |
| Olfr592       | 0 | 0        | 0 | 0    | 0        | 0.027298 | 0        | Unclassified | chr7:110333116-110336055  | 0.94    |
| Olfr372       | 0 | 0        | 0 | 4    | 0.066667 | 0.037784 | 0.033432 | Unclassified | chr8:74579558-74582574    | 1.017   |
| Olfr199       | 0 | 0        | 0 | 1    | 0.016667 | 0        | 1        | Unclassified | chr16:59215511-59218437   | 0.927   |
| Cldn12        | 0 | 0        | 0 | 37   | 0.166667 | 0.989675 | 7.025824 | Unclassified | chr5:5505014-5516976      | 9.963   |
| Rgma          | 0 | 0        | 0 | 70   | 1.166667 | 0.14286  | 0.393011 | Unclassified | chr7:80518405-80564785    | 44.381  |
| Tlr3          | 0 | 0        | 0 | 31   | 0.516667 | 0.358148 | 11.04222 | Stalled      | chr8:46481018-46497893    | 14.876  |
| Kcnc4         | 0 | 0        | 0 | 34   | 0.566667 | 0.097835 | 0.823455 | Unclassified | chr3:107241220-107263816  | 20.597  |
| Marco         | 0 | 0        | 0 | 49   | 0.816667 | 1.19375  | 0.407289 | Unclassified | chr1:122371114-122403661  | 30.548  |
| Rg9mtd1       | 0 | 0        | 0 | 383  | 6.383333 | 12.5301  | 12.54488 | Unclassified | chr16:56033832-56039887   | 4.056   |
| Maoa          | 0 | 0        | 0 | 100  | 1.666667 | 0.557499 | 17.06608 | Stalled      | chrX:16194823-16264938    | 68.116  |
| 4930524E20Rik | 0 | 0        | 0 | 1    | 0.016667 | 0        | 1        | Unclassified | chrX:112019190-112022119  | 0.93    |
| Eif3h         | 0 | 0        | 0 | 1384 | 23.06667 | 141.768  | 11.30696 | Unclassified | chr15:51618108-51699007   | 78.9    |
| Upf3b         | 0 | 0        | 0 | 216  | 3.6      | 11.6132  | 19.87265 | Stalled      | chrX:34631828-34652317    | 18.49   |
| Mrpl38        | 0 | 0        | 0 | 345  | 5.75     | 21.4705  | 4.420926 | Unclassified | chr11:115993130-116002182 | 7.053   |
| Odf3b         | 0 | 0        | 0 | 11   | 0.183333 | 0.554553 | 0.847912 | Unclassified | chr15:89207879-89211685   | 1.807   |
| Med15         | 0 | 0        | 0 | 993  | 16.55    | 12.266   | 13.25266 | Unclassified | chr16:17651313-17725023   | 71.711  |
| Mepe          | 0 | 0        | 0 | 10   | 0.166667 | 0        | 0        | Unclassified | chr5:104752347-104767630  | 13.284  |
| Srrd          | 0 | 0        | 0 | 362  | 6.033333 | 6.48108  | 4.527143 | Unclassified | chr5:112766410-112774060  | 5.651   |
| D5Ert577e     | 0 | 0        | 0 | 2    | 0.033333 | 0.013633 | 0.96526  | Unclassified | chr5:95883824-95914608    | 28.785  |
| Ccdc75        | 0 | 0        | 0 | 391  | 6.516667 | 3.67856  | 32.32943 | Unclassified | chr17:79232855-79247648   | 12.794  |
| Olfr149       | 0 | 0        | 0 | 2    | 0.033333 | 0        | 0        | Unclassified | chr9:39509416-39512352    | 0.937   |
| Xrcc2         | 0 | 0        | 0 | 337  | 5.616667 | 2.37756  | 12.46066 | Unclassified | chr5:25195633-25213615    | 15.983  |
| Plin4         | 0 | 0        | 0 | 164  | 2.733333 | 0.052204 | 0.664962 | Unclassified | chr17:56240013-56251225   | 9.213   |
| Gabarapl1     | 0 | 0        | 0 | 155  | 2.583333 | 13.2336  | 2.860691 | Elongating   | chr6:129481209-129492349  | 9.141   |
| Golga7        | 0 | 0        | 0 | 487  | 8.116667 | 18.776   | 20.12634 | Unclassified | chr8:24351797-24369552    | 15.756  |

|                      |   |   |   |      |          |          |          |              |                           |         |
|----------------------|---|---|---|------|----------|----------|----------|--------------|---------------------------|---------|
| <b>38782</b>         | 0 | 0 | 0 | 918  | 15.3     | 8.74232  | 16.74551 | Unclassified | chr2:60045992-60086442    | 38.451  |
| <b>Tmem183a</b>      | 0 | 0 | 0 | 650  | 10.83333 | 13.8884  | 26.17121 | Unclassified | chr1:136242673-136260576  | 15.904  |
| <b>Arc</b>           | 0 | 0 | 0 | 95   | 1.583333 | 0.867721 | 18.41457 | Stalled      | chr15:74499512-74505000   | 3.489   |
| <b>Fancm</b>         | 0 | 0 | 0 | 541  | 9.016667 | 3.59415  | 21.3359  | Unclassified | chr12:66174592-66233045   | 56.454  |
| <b>Araf</b>          | 0 | 0 | 0 | 368  | 6.133333 | 24.8484  | 6.110721 | Unclassified | chrX:20423668-20437647    | 11.98   |
| <b>Glud1</b>         | 0 | 0 | 0 | 761  | 12.68333 | 24.353   | 39.01898 | Unclassified | chr14:35121912-35158219   | 34.308  |
| <b>Ar</b>            | 0 | 0 | 0 | 35   | 0.583333 | 0.115267 | 0        | Unclassified | chrX:95343088-95512486    | 167.399 |
| <b>Pdcd2</b>         | 0 | 0 | 0 | 511  | 8.516667 | 18.4998  | 12.62186 | Unclassified | chr17:15658538-15666265   | 5.728   |
| <b>Aqp5</b>          | 0 | 0 | 0 | 9    | 0.15     | 0.165265 | 1.077662 | Unclassified | chr15:99419458-99425260   | 3.803   |
| <b>Gm2a</b>          | 0 | 0 | 0 | 450  | 7.5      | 35.7588  | 21.67141 | Unclassified | chr11:54909618-54924400   | 12.783  |
| <b>Wnt9a</b>         | 0 | 0 | 0 | 34   | 0.566667 | 0.069421 | 0.469098 | Unclassified | chr11:59118431-59147054   | 26.624  |
| <b>Ndel1</b>         | 0 | 0 | 0 | 679  | 11.31667 | 9.11507  | 35.65335 | Unclassified | chr11:68634950-68668633   | 31.684  |
| <b>Il23a</b>         | 0 | 0 | 0 | 13   | 0.216667 | 0.13203  | 1.917892 | Unclassified | chr10:127733195-127737140 | 1.946   |
| <b>Trem2</b>         | 0 | 0 | 0 | 11   | 0.183333 | 0.153136 | 0.820953 | Unclassified | chr17:48483725-48491598   | 5.874   |
| <b>Klhdc8b</b>       | 0 | 0 | 0 | 333  | 5.55     | 2.37355  | 2.994348 | Elongating   | chr9:108349969-108365912  | 13.944  |
| <b>Plekha3</b>       | 0 | 0 | 0 | 611  | 10.18333 | 5.08666  | 10.07989 | Unclassified | chr2:76511371-76535392    | 22.022  |
| <b>Cyp2c39</b>       | 0 | 0 | 0 | 19   | 0.316667 | 0.033268 | 0        | Unclassified | chr19:39583311-39643019   | 57.709  |
| <b>Cyp2c40</b>       | 0 | 0 | 0 | 8    | 0.133333 | 0.011497 | 0        | Unclassified | chr19:39841563-39889304   | 45.742  |
| <b>Rbm41</b>         | 0 | 0 | 0 | 136  | 2.266667 | 1.32287  | 3.930747 | Unclassified | chrX:136478781-136535090  | 54.31   |
| <b>Cyp2b9</b>        | 0 | 0 | 0 | 13   | 0.216667 | 0.010234 | 0        | Unclassified | chr7:26956427-26995679    | 37.253  |
| <b>Cyp2c29</b>       | 0 | 0 | 0 | 17   | 0.283333 | 0.151527 | 0        | Unclassified | chr19:39359574-39405203   | 43.63   |
| <b>Cyp2b19</b>       | 0 | 0 | 0 | 17   | 0.283333 | 0.019022 | 1.578976 | Unclassified | chr7:27540205-27557649    | 15.445  |
| <b>Trim54</b>        | 0 | 0 | 0 | 22   | 0.366667 | 0.167315 | 0        | Unclassified | chr5:31416984-31439999    | 21.016  |
| <b>C1qc</b>          | 0 | 0 | 0 | 12   | 0.2      | 0.072958 | 0.781612 | Unclassified | chr4:136445716-136450829  | 3.114   |
| <b>Slamf8</b>        | 0 | 0 | 0 | 35   | 0.583333 | 0.07539  | 1.727804 | Unclassified | chr1:174511507-174522699  | 9.193   |
| <b>Srpx2</b>         | 0 | 0 | 0 | 15   | 0.25     | 0.035675 | 0        | Unclassified | chrX:130440964-130466989  | 24.026  |
| <b>Efhh</b>          | 0 | 0 | 0 | 50   | 0.833333 | 0.23599  | 2.952231 | Unclassified | chr17:53538213-53604646   | 64.434  |
| <b>Tmem214</b>       | 0 | 0 | 0 | 441  | 7.35     | 27.2797  | 6.055504 | Unclassified | chr5:31170019-31179840    | 7.822   |
| <b>Kcnj14</b>        | 0 | 0 | 0 | 236  | 3.933333 | 0.087212 | 1.311127 | Elongating   | chr7:53071836-53082117    | 8.282   |
| <b>Rgmb</b>          | 0 | 0 | 0 | 119  | 1.983333 | 1.8248   | 14.30585 | Stalled      | chr17:15943216-15965550   | 20.335  |
| <b>Cyp27a1</b>       | 0 | 0 | 0 | 48   | 0.8      | 0.813735 | 3.47926  | Unclassified | chr1:74758147-74784464    | 24.318  |
| <b>Hopx</b>          | 0 | 0 | 0 | 61   | 1.016667 | 4.13554  | 1.305717 | Unclassified | chr5:77516010-77546148    | 28.139  |
| <b>Ttf1</b>          | 0 | 0 | 0 | 556  | 9.266667 | 5.27144  | 14.64512 | Unclassified | chr2:28913782-28943170    | 27.389  |
| <b>Ccl2</b>          | 0 | 0 | 0 | 6    | 0.1      | 0.079506 | 0.226206 | Unclassified | chr11:81847078-81850954   | 1.877   |
| <b>Ccl20</b>         | 0 | 0 | 0 | 1    | 0.016667 | 0        | 0        | Unclassified | chr1:83111340-83115741    | 2.402   |
| <b>Ccl11</b>         | 0 | 0 | 0 | 11   | 0.183333 | 0.059722 | 1.483146 | Unclassified | chr11:81869333-81876457   | 5.125   |
| <b>Ccl12</b>         | 0 | 0 | 0 | 0    | 0        | 0        | 0        | Unclassified | chr11:81913346-81916901   | 1.556   |
| <b>Ccl1</b>          | 0 | 0 | 0 | 4    | 0.066667 | 0.152273 | 0.417249 | Unclassified | chr11:81990167-81995314   | 3.148   |
| <b>Zfp524</b>        | 0 | 0 | 0 | 394  | 6.566667 | 4.92871  | 16.12994 | Stalled      | chr7:4965109-4970090      | 2.982   |
| <b>Rp2h</b>          | 0 | 0 | 0 | 193  | 3.216667 | 6.54699  | 21.49954 | Stalled      | chrX:19939733-19977475    | 35.743  |
| <b>Wnt6</b>          | 0 | 0 | 0 | 34   | 0.566667 | 0.58256  | 0.878809 | Unclassified | chr1:74816465-74831893    | 13.429  |
| <b>Nkain1</b>        | 0 | 0 | 0 | 78   | 1.3      | 0.225993 | 2.240863 | Unclassified | chr4:130123704-130169623  | 43.92   |
| <b>Fam103a1</b>      | 0 | 0 | 0 | 232  | 3.866667 | 5.84205  | 30.90979 | Stalled      | chr7:88905838-88914376    | 6.539   |
| <b>Tnks</b>          | 0 | 0 | 0 | 1101 | 18.35    | 3.57512  | 18.64777 | Unclassified | chr8:35892232-36030744    | 136.513 |
| <b>Tomm34</b>        | 0 | 0 | 0 | 958  | 15.96667 | 23.0396  | 9.765074 | Unclassified | chr2:163879276-163898838  | 17.563  |
| <b>Marveld2</b>      | 0 | 0 | 0 | 174  | 2.9      | 0.974803 | 16.11539 | Stalled      | chr13:101365911-101388899 | 20.989  |
| <b>Signlece</b>      | 0 | 0 | 0 | 23   | 0.383333 | 0.17817  | 0.576158 | Unclassified | chr7:50906439-50917531    | 9.093   |
| <b>Prp2</b>          | 0 | 0 | 0 | 2    | 0.033333 | 0        | 0        | Unclassified | chr6:132543963-132550720  | 4.758   |
| <b>Zan</b>           | 0 | 0 | 0 | 131  | 2.183333 | 0.031104 | 0        | Unclassified | chr5:137819865-137920292  | 98.428  |
| <b>A430110N23Rik</b> | 0 | 0 | 0 | 87   | 1.45     | 0.291744 | 0.798399 | Unclassified | chr7:4875445-4896399      | 18.955  |
| <b>Dub1a</b>         | 0 | 0 | 0 | 2    | 0.033333 | 0.001873 | 2        | Unclassified | chr7:111988825-111993018  | 2.194   |
| <b>Rp1</b>           | 0 | 0 | 0 | 10   | 0.166667 | 0.022129 | 0        | Unclassified | chr1:4334223-4352473      | 16.251  |
| <b>Psmid14</b>       | 0 | 0 | 0 | 1221 | 20.35    | 36.5166  | 18.68959 | Unclassified | chr2:61547750-61638433    | 88.684  |
| <b>Scnm1</b>         | 0 | 0 | 0 | 129  | 2.15     | 26.3208  | 8.916221 | Unclassified | chr3:94933641-94939934    | 4.294   |
| <b>Ogfr</b>          | 0 | 0 | 0 | 670  | 11.16667 | 57.7351  | 5.643266 | Unclassified | chr2:180322111-180330542  | 6.432   |
| <b>Anks4b</b>        | 0 | 0 | 0 | 10   | 0.166667 | 0.037899 | 1.050952 | Unclassified | chr7:127315371-127327229  | 9.859   |
| <b>Gcnt3</b>         | 0 | 0 | 0 | 8    | 0.133333 | 0.178791 | 0.44418  | Unclassified | chr9:69879302-69887895    | 6.594   |
| <b>Arv1</b>          | 0 | 0 | 0 | 370  | 6.166667 | 12.427   | 11.82216 | Unclassified | chr8:127244038-127258023  | 11.986  |
| <b>Sync</b>          | 0 | 0 | 0 | 232  | 3.866667 | 0.114501 | 0.162815 | Unclassified | chr4:128962864-128985803  | 20.94   |
| <b>Hc</b>            | 0 | 0 | 0 | 106  | 1.766667 | 0.094883 | 0.425627 | Unclassified | chr2:34838850-34918916    | 78.067  |
| <b>Cyp2j13</b>       | 0 | 0 | 0 | 19   | 0.316667 | 0.017581 | 0        | Unclassified | chr4:95709350-95746231    | 34.882  |
| <b>B3gnt8</b>        | 0 | 0 | 0 | 110  | 1.833333 | 5.43662  | 2.89824  | Unclassified | chr7:26410642-26414509    | 1.868   |
| <b>Atg9b</b>         | 0 | 0 | 0 | 105  | 1.75     | 1.02139  | 0.405812 | Unclassified | chr5:23889998-23899961    | 7.964   |
| <b>Hbb-y</b>         | 0 | 0 | 0 | 2    | 0.033333 | 0.144934 | 1        | Unclassified | chr7:111000267-111003721  | 1.455   |
| <b>Brd7</b>          | 0 | 0 | 0 | 708  | 11.8     | 23.9062  | 8.983605 | Unclassified | chr8:90856210-90888090    | 29.881  |
| <b>Svs6</b>          | 0 | 0 | 0 | 3    | 0.05     | 0        | 1        | Unclassified | chr2:164140486-164144186  | 1.701   |
| <b>Ica1l</b>         | 0 | 0 | 0 | 184  | 3.066667 | 0.273883 | 1.395161 | Unclassified | chr1:60045911-60101931    | 54.021  |
| <b>Alx1</b>          | 0 | 0 | 0 | 11   | 0.183333 | 0.061691 | 0        | Unclassified | chr10:102470480-102493411 | 20.932  |
| <b>Rab39</b>         | 0 | 0 | 0 | 92   | 1.533333 | 2.31604  | 21.07276 | Stalled      | chr9:53492214-53516337    | 22.124  |
| <b>9530002B09Rik</b> | 0 | 0 | 0 | 4    | 0.066667 | 0        | 0        | Unclassified | chr4:122364501-122382378  | 15.878  |
| <b>Pja1</b>          | 0 | 0 | 0 | 57   | 0.95     | 9.45522  | 7.372783 | Unclassified | chrX:96661072-96668074    | 5.003   |
| <b>E430025E21Rik</b> | 0 | 0 | 0 | 627  | 10.45    | 5.73424  | 9.347647 | Unclassified | chr15:59163551-59207707   | 42.157  |
| <b>Pitx1</b>         | 0 | 0 | 0 | 12   | 0.2      | 0.209417 | 0.944869 | Unclassified | chr13:55926414-55934786   | 6.373   |
| <b>Olfir871</b>      | 0 | 0 | 0 | 1    | 0.016667 | 0.044695 | 0        | Unclassified | chr9:20014650-20017797    | 1.148   |
| <b>Cpa4</b>          | 0 | 0 | 0 | 32   | 0.533333 | 0.049748 | 1.306503 | Unclassified | chr6:30516375-30541747    | 23.373  |
| <b>Anxa9</b>         | 0 | 0 | 0 | 60   | 1        | 1.00499  | 0.825421 | Unclassified | chr3:95100015-95113098    | 11.084  |
| <b>1700013B16Rik</b> | 0 | 0 | 0 | 17   | 0.283333 | 0.046394 | 0.298902 | Unclassified | chr13:59801443-59809558   | 6.116   |
| <b>Cpe</b>           | 0 | 0 | 0 | 73   | 1.216667 | 0.110222 | 0.586996 | Unclassified | chr8:67071348-67173837    | 100.49  |
| <b>Cpa3</b>          | 0 | 0 | 0 | 19   | 0.316667 | 0.062215 | 0        | Unclassified | chr3:20115521-20144076    | 26.556  |
| <b>Cp</b>            | 0 | 0 | 0 | 128  | 2.133333 | 0.182591 | 0.564569 | Unclassified | chr3:19855053-19907609    | 50.557  |
| <b>Lsmp</b>          | 0 | 0 | 0 | 253  | 4.216667 | 0.083122 | 0        | Unclassified | chr16:41531454-42146326   | 612.873 |
| <b>Cys1</b>          | 0 | 0 | 0 | 29   | 0.483333 | 0.188582 | 1.535871 | Unclassified | chr12:25350702-25368660   | 15.959  |
| <b>Agbl3</b>         | 0 | 0 | 0 | 350  | 5.833333 | 1.58467  | 124.012  | Stalled      | chr6:34728431-34807932    | 77.502  |
| <b>Fkrp</b>          | 0 | 0 | 0 | 359  | 5.983333 | 10.9192  | 6.725455 | Unclassified | chr7:17394615-17404081    | 7.467   |
| <b>Pus3</b>          | 0 | 0 | 0 | 309  | 5.15     | 4.26061  | 4.933201 | Unclassified | chr9:35365050-35374985    | 7.936   |
| <b>Tmed11</b>        | 0 | 0 | 0 | 12   | 0.2      | 0.050392 | 0        | Unclassified | chr5:109206253-109226382  | 18.13   |

|                      |   |          |   |      |          |          |          |              |                           |         |
|----------------------|---|----------|---|------|----------|----------|----------|--------------|---------------------------|---------|
| <b>Abcf1</b>         | 0 | 0        | 0 | 679  | 11.31667 | 55.1722  | 7.605612 | Unclassified | chr17:36093763-36108695   | 12.933  |
| <b>Aggf1</b>         | 0 | 0        | 0 | 674  | 11.23333 | 19.8131  | 11.55908 | Unclassified | chr13:96120671-96147289   | 24.619  |
| <b>Pglyrp3</b>       | 0 | 0        | 0 | 10   | 0.166667 | 0.034701 | 0        | Unclassified | chr3:91816504-91835505    | 17.002  |
| <b>Serf2</b>         | 0 | 0        | 0 | 416  | 6.933333 | 35.133   | 11.28741 | Unclassified | chr2:121272963-121279162  | 4.2     |
| <b>BC022687</b>      | 0 | 0        | 0 | 228  | 3.8      | 2.24202  | 2.831477 | Elongating   | chr12:114045185-114054456 | 7.272   |
| <b>Eif1ay</b>        | 0 | 0        | 0 | 263  | 4.383333 | 62.1881  | 18.42884 | Unclassified | chrX:155808126-155823631  | 13.506  |
| <b>Thoc7</b>         | 0 | 0        | 0 | 274  | 4.566667 | 21.2017  | 10.50485 | Unclassified | chr14:14781527-14795739   | 12.213  |
| <b>Yy1</b>           | 0 | 0        | 0 | 1081 | 18.01667 | 22.2034  | 12.17232 | Unclassified | chr12:110029520-110054842 | 23.323  |
| <b>Neu4</b>          | 0 | 0        | 0 | 18   | 0.3      | 0.045498 | 0.68945  | Unclassified | chr1:95915069-95924907    | 7.839   |
| <b>Zap70</b>         | 0 | 0        | 0 | 64   | 1.066667 | 0.194009 | 0.246514 | Unclassified | chr1:36816705-36839661    | 20.957  |
| <b>Plagl1</b>        | 0 | 0        | 0 | 46   | 0.766667 | 0.220746 | 9.402936 | Unclassified | chr10:12808593-12851501   | 40.909  |
| <b>Zscan4c</b>       | 0 | 0        | 0 | 0    | 0        | 0.01869  | 0        | Unclassified | chr7:11589093-11595896    | 4.804   |
| <b>Zfa</b>           | 0 | 0        | 0 | 2    | 0.033333 | 0.659547 | 0.707859 | Unclassified | chr10:52262123-52267545   | 3.423   |
| <b>Eid1</b>          | 0 | 0        | 0 | 137  | 2.283333 | 18.4687  | 8.611134 | Unclassified | chr2:125496835-125501378  | 2.544   |
| <b>Serpnb3b</b>      | 0 | 0        | 0 | 4    | 0.066667 | 0        | 0.67231  | Unclassified | chr1:109050537-109059691  | 7.155   |
| <b>Nipsnap3b</b>     | 0 | 0        | 0 | 274  | 4.566667 | 11.7774  | 40.99948 | Stalled      | chr4:53022795-53034931    | 10.137  |
| <b>Rtn4rl2</b>       | 0 | 0        | 0 | 39   | 0.65     | 0.964015 | 0.846065 | Unclassified | chr2:84712102-84728849    | 14.748  |
| <b>Angel2</b>        | 0 | 0        | 0 | 583  | 9.716667 | 6.01539  | 23.34079 | Unclassified | chr1:192750423-192769617  | 17.195  |
| <b>Ankk1</b>         | 0 | 0        | 0 | 17   | 0.283333 | 0.071573 | 0.418627 | Unclassified | chr9:49223326-49237126    | 11.801  |
| <b>Gm13103</b>       | 0 | 0        | 0 | 0    | 0        | 0.006975 | 0        | Unclassified | chr4:143434399-143443540  | 7.142   |
| <b>Fam55d</b>        | 0 | 0        | 0 | 250  | 4.166667 | 0.312466 | 0.487028 | Unclassified | chr9:47968197-48207603    | 237.407 |
| <b>1110036003Rik</b> | 0 | 0        | 0 | 27   | 0.45     | 0.871621 | 1.443975 | Unclassified | chr11:100270063-100278133 | 6.071   |
| <b>Mst1r</b>         | 0 | 0        | 0 | 35   | 0.583333 | 0.057216 | 1.542698 | Unclassified | chr9:107807219-107822712  | 13.494  |
| <b>Setdb2</b>        | 0 | 0        | 0 | 595  | 9.916667 | 5.01757  | 60.39631 | Stalled      | chr14:60020847-60061714   | 38.868  |
| <b>Irak4</b>         | 0 | 0        | 0 | 480  | 8        | 6.89858  | 40.34633 | Unclassified | chr15:94372090-94398745   | 24.656  |
| <b>Hif</b>           | 0 | 0        | 0 | 68   | 1.133333 | 0.337093 | 1.364343 | Unclassified | chr11:90197848-90254231   | 54.384  |
| <b>Atp6v1e2</b>      | 0 | 0        | 0 | 10   | 0.166667 | 0.025556 | 0.257747 | Unclassified | chr17:87343450-87349227   | 3.778   |
| <b>Snrpg</b>         | 0 | 0        | 0 | 629  | 10.48333 | 130.986  | 14.45266 | Unclassified | chr6:86319533-86328896    | 7.364   |
| <b>Aldh5a1</b>       | 0 | 0        | 0 | 57   | 0.95     | 1.30266  | 5.72798  | Unclassified | chr13:24999448-25031530   | 30.083  |
| <b>Eapa2</b>         | 0 | 0        | 0 | 14   | 0.233333 | 0.037089 | 0.454392 | Unclassified | chr6:42537211-42549371    | 10.161  |
| <b>Gabbr1</b>        | 0 | 0        | 0 | 230  | 3.833333 | 0.075796 | 0.658729 | Unclassified | chr5:72089254-72528483    | 437.23  |
| <b>Chst2</b>         | 0 | 0        | 0 | 16   | 0.266667 | 0.285343 | 0.654105 | Unclassified | chr9:95301344-95309689    | 6.346   |
| <b>Tdrd5</b>         | 0 | 0        | 0 | 37   | 0.616667 | 0.052235 | 0.57341  | Unclassified | chr1:158185434-158235479  | 48.046  |
| <b>Gabbr2</b>        | 0 | 0        | 0 | 100  | 1.666667 | 0.02885  | 0        | Unclassified | chr11:42231258-42446093   | 212.836 |
| <b>Rad9b</b>         | 0 | 0        | 0 | 590  | 9.833333 | 0.89304  | 23.50621 | Unclassified | chr5:122775516-122806204  | 28.689  |
| <b>Egr3</b>          | 0 | 0        | 0 | 213  | 3.55     | 5.68317  | 1.674146 | Elongating   | chr14:70475251-70479964   | 2.714   |
| <b>Egr4</b>          | 0 | 0        | 0 | 7    | 0.116667 | 0.335666 | 0.643148 | Unclassified | chr6:85461115-85465536    | 2.422   |
| <b>Ttc9b</b>         | 0 | 0        | 0 | 12   | 0.2      | 0.184272 | 2.347032 | Unclassified | chr7:28436942-28441226    | 2.285   |
| <b>Ang6</b>          | 0 | 0        | 0 | 0    | 0        | 0        | 0        | Unclassified | chr14:44579490-44581934   | 0.445   |
| <b>Hes2</b>          | 0 | 0        | 0 | 14   | 0.233333 | 0.264359 | 0.619803 | Unclassified | chr4:151530975-151536578  | 3.604   |
| <b>Olfr284</b>       | 0 | 0        | 0 | 1    | 0.016667 | 0        | 0        | Unclassified | chr15:98170452-98173370   | 0.919   |
| <b>Olfr846</b>       | 0 | 0        | 0 | 0    | 0        | 0        | 0        | Unclassified | chr9:19164859-19167800    | 0.942   |
| <b>Gpr33</b>         | 0 | 0        | 0 | 4    | 0.066667 | 0.018507 | 0        | Unclassified | chr12:53123992-53131050   | 5.059   |
| <b>Olfr1402</b>      | 0 | 0        | 0 | 1    | 0.016667 | 0.053235 | 1        | Unclassified | chr3:97214139-97217102    | 0.964   |
| <b>Col4a3bp</b>      | 0 | 0        | 0 | 672  | 11.2     | 5.75453  | 50.93782 | Stalled      | chr13:97310689-97410121   | 97.433  |
| <b>Olfr448</b>       | 0 | 0        | 0 | 2    | 0.033333 | 0        | 1        | Unclassified | chr6:42844451-42847384    | 0.934   |
| <b>Lcn12</b>         | 0 | 0        | 0 | 15   | 0.25     | 0        | 0.514087 | Unclassified | chr2:25346364-25351431    | 3.068   |
| <b>Olfr960</b>       | 0 | 0        | 0 | 0    | 0        | 0        | 0        | Unclassified | chr9:39428709-39431660    | 0.952   |
| <b>Olfr281</b>       | 0 | 0        | 0 | 1    | 0.016667 | 0.034215 | 0        | Unclassified | chr15:98284742-98287678   | 0.937   |
| <b>Olfr1412</b>      | 0 | 0        | 0 | 1    | 0.016667 | 0.059688 | 0        | Unclassified | chr1:94482908-94485874    | 0.967   |
| <b>Olfr729</b>       | 0 | 0        | 0 | 2    | 0.033333 | 0        | 2        | Unclassified | chr14:50767575-50770547   | 0.973   |
| <b>Zmym5</b>         | 0 | 0        | 0 | 294  | 4.9      | 2.68612  | 13.82814 | Unclassified | chr14:57409424-57432553   | 21.13   |
| <b>Ppic</b>          | 0 | 0        | 0 | 6    | 0.1      | 0.229219 | 0.680878 | Unclassified | chr18:53565994-53579661   | 11.668  |
| <b>Fam131b</b>       | 0 | 0        | 0 | 22   | 0.366667 | 0.15449  | 1.492163 | Unclassified | chr6:42265310-42276639    | 9.33    |
| <b>Rhag</b>          | 0 | 0        | 0 | 14   | 0.233333 | 0.105143 | 0        | Unclassified | chr17:40946097-40977703   | 29.607  |
| <b>Rheb</b>          | 0 | 0        | 0 | 1067 | 17.78333 | 8.51777  | 14.82441 | Unclassified | chr5:24308640-24350179    | 39.54   |
| <b>1700018B08Rik</b> | 0 | 0        | 0 | 11   | 0.183333 | 0.083069 | 0.530565 | Unclassified | chr8:124054683-124067854  | 11.172  |
| <b>Psg23</b>         | 0 | 0        | 0 | 4    | 0.066667 | 0.020065 | 0        | Unclassified | chr7:19191691-19203850    | 10.16   |
| <b>Zfp109</b>        | 0 | 0        | 0 | 51   | 0.85     | 1.41788  | 9.50009  | Unclassified | chr7:25012813-25024617    | 9.805   |
| <b>Gm11596</b>       | 0 | 0        | 0 | 0    | 0        | 0        | 0        | Unclassified | chr11:99653988-99656606   | 0.619   |
| <b>Acpp</b>          | 0 | 0        | 0 | 84   | 1.4      | 0.721326 | 13.37701 | Stalled      | chr9:104190569-104242052  | 49.484  |
| <b>Olfr690</b>       | 0 | 0        | 0 | 1    | 0.016667 | 0.024136 | 1        | Unclassified | chr7:112477730-112480792  | 1.063   |
| <b>Olfr480</b>       | 0 | 0        | 0 | 2    | 0.033333 | 0.149462 | 1        | Unclassified | chr7:115209281-115212310  | 1.03    |
| <b>Cldn9</b>         | 0 | 0        | 0 | 6    | 0.1      | 0.125037 | 0.910864 | Unclassified | chr17:23819550-23822985   | 1.436   |
| <b>Klk4</b>          | 0 | 0        | 0 | 18   | 0.3      | 0.113969 | 0.464884 | Unclassified | chr7:51134541-51141174    | 4.634   |
| <b>Sicl15a1</b>      | 0 | 0        | 0 | 64   | 1.066667 | 0.126007 | 1.739563 | Unclassified | chr14:121858842-121906476 | 45.635  |
| <b>Mylk3</b>         | 0 | 0        | 0 | 40   | 0.666667 | 0.041747 | 2.647755 | Unclassified | chr8:87848827-87891223    | 40.397  |
| <b>Chst9</b>         | 0 | 0        | 0 | 151  | 2.516667 | 0        | 0        | Unclassified | chr18:15610683-15878555   | 265.873 |
| <b>Pnliprp1</b>      | 0 | 0        | 0 | 22   | 0.366667 | 0.023749 | 0        | Unclassified | chr19:58801376-58818659   | 15.284  |
| <b>Tcfap2e</b>       | 0 | 0        | 0 | 66   | 1.1      | 0.296646 | 0.480092 | Unclassified | chr4:126393246-126415513  | 20.268  |
| <b>Zmynd12</b>       | 0 | 0        | 0 | 259  | 4.316667 | 1.55872  | 54.01547 | Stalled      | chr4:119093288-119126503  | 31.216  |
| <b>Brwd3</b>         | 0 | 0        | 0 | 298  | 4.966667 | 2.23847  | 30.58375 | Stalled      | chrX:105937546-106031694  | 92.149  |
| <b>Il2</b>           | 0 | 0        | 0 | 3    | 0.05     | 0        | 0        | Unclassified | chr3:37019643-37026875    | 5.233   |
| <b>Xiap</b>          | 0 | 0        | 0 | 520  | 8.666667 | 5.11973  | 11.02577 | Unclassified | chrX:39419012-39462841    | 41.83   |
| <b>Arhgap29</b>      | 0 | 0        | 0 | 83   | 1.383333 | 0.110789 | 1.768703 | Unclassified | chr3:121654243-121719071  | 62.829  |
| <b>Fbxl19</b>        | 0 | 20.9557  | 0 | 215  | 3.583333 | 7.15516  | 5.715592 | Unclassified | chr7:134888288-134912442  | 22.155  |
| <b>Atg5</b>          | 0 | 152.6772 | 0 | 1059 | 17.65    | 6.45599  | 34.57567 | Unclassified | chr10:43986163-44084097   | 95.935  |
| <b>Dnajb3</b>        | 0 | 0        | 0 | 21   | 0.35     | 2.31738  | 18       | Unclassified | chr1:90101306-90104323    | 1.018   |
| <b>Hs2st1</b>        | 0 | 0        | 0 | 908  | 15.13333 | 2.2529   | 36.91875 | Stalled      | chr3:144094070-144235180  | 139.111 |
| <b>Il1rn</b>         | 0 | 0        | 0 | 23   | 0.383333 | 0.348833 | 0.393624 | Unclassified | chr2:24190379-24207010    | 14.632  |
| <b>Rprml</b>         | 0 | 0        | 0 | 9    | 0.15     | 0.478221 | 0.544268 | Unclassified | chr11:103508822-103511894 | 1.073   |
| <b>Cpxcr1</b>        | 0 | 0        | 0 | 6    | 0.1      | 0        | 0        | Unclassified | chrX:113560552-113592392  | 29.841  |
| <b>Mixl1</b>         | 0 | 0        | 0 | 35   | 0.583333 | 0.336239 | 0.746873 | Unclassified | chr1:182623180-182629165  | 3.986   |
| <b>Olfr154</b>       | 0 | 0        | 0 | 1    | 0.016667 | 0        | 0        | Unclassified | chr2:85503533-85506612    | 1.08    |
| <b>Dbf4</b>          | 0 | 0        | 0 | 531  | 8.85     | 10.5164  | 22.65084 | Unclassified | chr5:8397010-8424606      | 25.597  |
| <b>Sptlc3</b>        | 0 | 0        | 0 | 72   | 1.2      | 0.013936 | 0.674153 | Unclassified | chr2:139317655-139463410  | 143.756 |

|               |   |          |   |      |           |          |          |              |                           |          |
|---------------|---|----------|---|------|-----------|----------|----------|--------------|---------------------------|----------|
| Sertad1       | 0 | 0        | 0 | 526  | 8.766667  | 8.35962  | 13.54532 | Unclassified | chr7:28269971-28275333    | 3.363    |
| Sgk2          | 0 | 0        | 0 | 39   | 0.65      | 0.030263 | 1.719919 | Unclassified | chr2:162811216-162839862  | 26.647   |
| Slamf1        | 0 | 0        | 0 | 198  | 3.3       | 2.18837  | 7.403356 | Unclassified | chr1:173695262-173731315  | 34.054   |
| Pde11a        | 0 | 0        | 0 | 301  | 5.016667  | 0.166504 | 0.53681  | Unclassified | chr2:75829188-76178710    | 347.523  |
| Stx8          | 0 | 0        | 0 | 1240 | 20.666667 | 2.21057  | 14.72298 | Unclassified | chr11:67777984-68020650   | 240.667  |
| Malt1         | 0 | 0        | 0 | 1303 | 21.71667  | 10.8396  | 19.17164 | Unclassified | chr18:65588650-65638446   | 47.797   |
| Epha1         | 0 | 0        | 0 | 86   | 1.433333  | 0.080259 | 0        | Unclassified | chr6:42308485-42325267    | 14.783   |
| Stag2         | 0 | 0        | 0 | 1062 | 17.7      | 7.73341  | 28.19111 | Unclassified | chrX:39501877-39630352    | 126.476  |
| Stat2         | 0 | 0        | 0 | 822  | 13.7      | 17.7797  | 8.041451 | Unclassified | chr10:127705631-127729905 | 22.275   |
| Aldh1a2       | 0 | 0        | 0 | 70   | 1.166667  | 0.311193 | 3.988297 | Unclassified | chr9:71061595-71144050    | 80.456   |
| Ppm1d         | 0 | 0        | 0 | 505  | 8.416667  | 7.56747  | 28.34783 | Unclassified | chr11:85122755-85160573   | 35.819   |
| Slc7a10       | 0 | 0        | 0 | 25   | 0.416667  | 0.032862 | 0.893517 | Unclassified | chr7:35969403-35986130    | 14.728   |
| Gal3st1       | 0 | 0        | 0 | 108  | 1.8       | 1.03012  | 19.40721 | Stalled      | chr11:3881715-3899317     | 15.603   |
| Ovol2         | 0 | 0        | 0 | 40   | 0.666667  | 0.312437 | 1.729777 | Unclassified | chr2:144130911-144159816  | 26.906   |
| Aven          | 0 | 0        | 0 | 632  | 10.53333  | 10.957   | 56.54598 | Stalled      | chr2:112331120-112471409  | 138.29   |
| Sil1          | 0 | 0        | 0 | 1551 | 25.85     | 18.7269  | 43.23039 | Unclassified | chr18:35426051-35660579   | 232.529  |
| Krt6a         | 0 | 0        | 0 | 7    | 0.116667  | 0        | 0.80654  | Unclassified | chr15:101520358-101526736 | 4.379    |
| Krt84         | 0 | 0        | 0 | 10   | 0.166667  | 0.029933 | 0.430199 | Unclassified | chr15:101355457-101365251 | 7.795    |
| Krt4          | 0 | 0        | 0 | 10   | 0.166667  | 0.012017 | 0        | Unclassified | chr15:101748965-101757166 | 6.202    |
| Zfp677        | 0 | 0        | 0 | 151  | 2.516667  | 2.39187  | 26.25178 | Stalled      | chr17:21518711-21536229   | 15.519   |
| Cnih4         | 0 | 0        | 0 | 359  | 5.983333  | 5.08143  | 14.36118 | Unclassified | chr1:183079061-183099125  | 18.065   |
| Ms4a6c        | 0 | 0        | 0 | 77   | 1.283333  | 10.4304  | 1.13687  | Unclassified | chr19:11541857-11556684   | 12.828   |
| Nucks1        | 0 | 0        | 0 | 1253 | 20.88333  | 13.3211  | 9.170645 | Unclassified | chr1:133805034-133832897  | 25.864   |
| AW551984      | 0 | 0        | 0 | 8    | 0.133333  | 0.037314 | 0.692037 | Unclassified | chr9:39394980-39413709    | 16.73    |
| Mlxip1        | 0 | 0        | 0 | 77   | 1.283333  | 0.77688  | 3.297513 | Unclassified | chr5:135580782-135613792  | 31.011   |
| Olfr13        | 0 | 105.7764 | 0 | 77   | 1.283333  | 0.634705 | 4.294565 | Unclassified | chr3:103539316-103543924  | 2.609    |
| Calca         | 0 | 0        | 0 | 7    | 0.116667  | 0.367454 | 1.477351 | Unclassified | chr7:121774991-121781871  | 4.881    |
| Fam179a       | 0 | 0        | 0 | 75   | 1.25      | 0.073173 | 0.86979  | Unclassified | chr17:72020600-72079009   | 56.41    |
| Zmat4         | 0 | 0        | 0 | 303  | 5.05      | 0.122732 | 1.702715 | Unclassified | chr8:24778132-25173575    | 393.444  |
| 5730469M10Rik | 0 | 0        | 0 | 348  | 5.8       | 11.5516  | 15.11199 | Unclassified | chr14:41807028-41829064   | 20.037   |
| Slco1c1       | 0 | 0        | 0 | 20   | 0.333333  | 0.025101 | 0.699215 | Unclassified | chr6:141471070-141518237  | 45.168   |
| Txndc16       | 0 | 0        | 0 | 901  | 15.01667  | 9.53765  | 28.5493  | Unclassified | chr14:45754122-45841069   | 84.948   |
| Gm13125       | 0 | 0        | 0 | 9    | 0.15      | 0.044687 | 0.820639 | Unclassified | chr4:143962662-143969836  | 5.175    |
| Zdhhc17       | 0 | 0        | 0 | 810  | 13.5      | 1.52578  | 47.04701 | Unclassified | chr10:110378837-110449122 | 68.286   |
| Slc22a18      | 0 | 0        | 0 | 48   | 0.8       | 0.017043 | 1.454831 | Unclassified | chr7:150657659-150685237  | 25.579   |
| Syt10         | 0 | 0        | 0 | 37   | 0.616667  | 0.073069 | 0        | Unclassified | chr15:89612823-89674291   | 59.469   |
| Clk2          | 0 | 0        | 0 | 611  | 10.18333  | 20.097   | 8.356455 | Unclassified | chr3:88966726-88981009    | 12.284   |
| A2bp1         | 0 | 0        | 0 | 1003 | 16.71667  | 0.061783 | 0.603747 | Unclassified | chr16:5882885-7412572     | 1527.688 |
| Lrrn1         | 0 | 0        | 0 | 26   | 0.433333  | 0.006967 | 1.894709 | Unclassified | chr6:107477778-107520204  | 40.427   |
| Lrpap1        | 0 | 0        | 0 | 554  | 9.233333  | 12.507   | 6.176742 | Unclassified | chr5:35434154-35450346    | 14.193   |
| Lrrc23        | 0 | 0        | 0 | 25   | 0.416667  | 0.191809 | 1.271781 | Unclassified | chr6:124719880-124731736  | 9.857    |
| Lrp6          | 0 | 0        | 0 | 731  | 12.18333  | 3.18525  | 35.63536 | Stalled      | chr6:134400434-134518931  | 116.498  |
| Orm1          | 0 | 0        | 0 | 10   | 0.166667  | 0.185894 | 0.302163 | Unclassified | chr4:63003599-63009196    | 3.598    |
| Tubb1         | 0 | 0        | 0 | 19   | 0.316667  | 0.117994 | 0.533788 | Unclassified | chr2:174274195-174283383  | 7.189    |
| C4b           | 0 | 0        | 0 | 17   | 0.283333  | 0.091334 | 0        | Unclassified | chr17:34865325-34882842   | 15.518   |
| Amigo2        | 0 | 0        | 0 | 175  | 2.916667  | 21.7883  | 8.32146  | Unclassified | chr15:97074504-97079718   | 3.215    |
| Ncr1          | 0 | 0        | 0 | 4    | 0.066667  | 0.052562 | 1.526179 | Unclassified | chr7:4287325-4296766      | 7.442    |
| Lyar          | 0 | 0        | 0 | 606  | 10.1      | 46.4604  | 13.5913  | Unclassified | chr5:38609720-38625545    | 13.826   |
| C2            | 0 | 0        | 0 | 98   | 1.633333  | 0.101794 | 0        | Unclassified | chr17:34999546-35021045   | 19.5     |
| C1qb          | 0 | 0        | 0 | 10   | 0.166667  | 0.314066 | 2.785896 | Unclassified | chr4:136436060-136444092  | 6.033    |
| C1qbp         | 0 | 0        | 0 | 602  | 10.03333  | 93.3779  | 4.357145 | Unclassified | chr11:70791347-70798528   | 5.182    |
| C3ar1         | 0 | 0        | 0 | 25   | 0.416667  | 0.137137 | 0.517038 | Unclassified | chr6:122797157-122808175  | 9.019    |
| Pou4f1        | 0 | 0        | 0 | 19   | 0.316667  | 0.590676 | 2.582551 | Unclassified | chr14:104861540-104869216 | 5.677    |
| Gzmg          | 0 | 0        | 0 | 7    | 0.116667  | 0.144135 | 0.5      | Unclassified | chr14:56775417-56780416   | 3        |
| Foxm1         | 0 | 0        | 0 | 377  | 6.283333  | 12.1968  | 16.43263 | Unclassified | chr6:128311011-128325904  | 12.894   |
| Olfr453       | 0 | 0        | 0 | 1    | 0.016667  | 0        | 0        | Unclassified | chr6:42692037-42694991    | 0.955    |
| Foxc2         | 0 | 0        | 0 | 13   | 0.216667  | 0.453979 | 0.769517 | Unclassified | chr8:123638070-123642794  | 2.725    |
| Gtf2a2        | 0 | 0        | 0 | 424  | 7.066667  | 9.29468  | 26.6813  | Unclassified | chr9:69858356-69870654    | 10.299   |
| Hlx           | 0 | 0        | 0 | 592  | 9.866667  | 8.70471  | 4.506171 | Unclassified | chr1:186551025-186558372  | 5.348    |
| Usp27x        | 0 | 0        | 0 | 70   | 1.166667  | 1.15226  | 9.096349 | Unclassified | chrX:6949718-6955400      | 3.683    |
| Ctrl          | 0 | 0        | 0 | 82   | 1.366667  | 0.793804 | 1.584092 | Unclassified | chr8:108455893-108459762  | 1.87     |
| Gzmc          | 0 | 0        | 0 | 3    | 0.05      | 1.2199   | 0.692969 | Unclassified | chr14:56850237-56855493   | 3.257    |
| Pon1          | 0 | 0        | 0 | 26   | 0.433333  | 0.016942 | 1.017561 | Unclassified | chr6:5118089-5145946      | 25.858   |
| Ubd           | 0 | 0        | 0 | 5    | 0.083333  | 0        | 0        | Unclassified | chr17:37328836-37333046   | 2.211    |
| Ubi3          | 0 | 0        | 0 | 1309 | 21.81667  | 39.4991  | 10.82979 | Unclassified | chr5:149316206-149366364  | 48.159   |
| Trex2         | 0 | 0        | 0 | 24   | 0.4       | 0.025229 | 1.702128 | Unclassified | chrX:70679043-70682682    | 1.64     |
| Tcp11         | 0 | 0        | 0 | 68   | 1.133333  | 1.01742  | 4.720893 | Unclassified | chr17:28203691-28219584   | 13.894   |
| Pold2         | 0 | 0        | 0 | 615  | 10.25     | 52.184   | 11.24489 | Unclassified | chr11:5772184-5780259     | 6.076    |
| Tcp10b        | 0 | 0        | 0 | 2    | 0.033333  | 0.049319 | 0        | Unclassified | chr17:7527045-7549537     | 20.493   |
| Kdm5c         | 0 | 0        | 0 | 512  | 8.533333  | 19.0062  | 9.795339 | Unclassified | chrX:148665772-148708897  | 41.126   |
| Kdm5d         | 0 | 0        | 0 | 188  | 3.133333  | 4.3051   | 7.465519 | Unclassified | chrY:232230-280254        | 46.025   |
| Smn1          | 0 | 0        | 0 | 382  | 6.366667  | 33.4727  | 15.32631 | Unclassified | chr13:100892809-100907653 | 12.845   |
| Ltbp4         | 0 | 0        | 0 | 121  | 2.016667  | 0.566356 | 1.307082 | Unclassified | chr7:28090159-28124631    | 32.473   |
| Akr1b7        | 0 | 0        | 0 | 9    | 0.15      | 0.129424 | 1.165524 | Unclassified | chr6:34360361-34373137    | 10.777   |
| Smpd2         | 0 | 0        | 0 | 154  | 2.566667  | 6.74306  | 0.690289 | Unclassified | chr10:41206977-41212146   | 3.17     |
| Defb47        | 0 | 0        | 0 | 2    | 0.033333  | 0        | 0        | Unclassified | chr14:63614938-63619903   | 2.966    |
| Kcnc          | 0 | 0        | 0 | 6    | 0.1       | 0.04043  | 0.461013 | Unclassified | chr4:115555004-115560569  | 3.566    |
| Arfgef1       | 0 | 0        | 0 | 1143 | 19.05     | 7.465614 | 22.47739 | Unclassified | chr1:10127587-10224751    | 95.165   |
| 4930428D18Rik | 0 | 0        | 0 | 0    | 0         | 0        | 0        | Unclassified | chrX:73636688-73643318    | 4.631    |
| Cpsf6         | 0 | 0        | 0 | 822  | 13.7      | 11.457   | 16.13113 | Unclassified | chr10:116781723-116816029 | 32.307   |
| 1700011H14Rik | 0 | 0        | 0 | 28   | 0.466667  | 0.021965 | 0.410043 | Unclassified | chr14:49846033-49867103   | 19.071   |
| Crebbp        | 0 | 0        | 0 | 1793 | 29.88333  | 3.02245  | 7.653812 | Unclassified | chr16:4084047-4215404     | 129.358  |
| 1700019D03Rik | 0 | 0        | 0 | 22   | 0.366667  | 0.630059 | 1.833352 | Unclassified | chr1:52981970-53011684    | 27.715   |
| Iqsec3        | 0 | 0        | 0 | 130  | 2.166667  | 0.041222 | 2.698941 | Unclassified | chr6:121322950-121425696  | 100.747  |
| Ceacam14      | 0 | 0        | 0 | 4    | 0.066667  | 0.025032 | 0.393572 | Unclassified | chr7:18396030-18400976    | 2.947    |
| 1700024G13Rik | 0 | 0        | 0 | 22   | 0.366667  | 0        | 0.75316  | Unclassified | chr14:33189687-33203559   | 11.873   |



|               |   |   |   |      |          |          |          |              |                           |         |
|---------------|---|---|---|------|----------|----------|----------|--------------|---------------------------|---------|
| Nfkbiz        | 0 | 0 | 0 | 620  | 10.33333 | 10.1401  | 9.351868 | Unclassified | chr16:55811490-55824251   | 10.762  |
| Stbd1         | 0 | 0 | 0 | 13   | 0.216667 | 0.541815 | 2.076202 | Unclassified | chr5:93030076-93035605    | 3.53    |
| 9930023K05Rik | 0 | 0 | 0 | 24   | 0.4      | 0.032242 | 0        | Unclassified | chr19:56534126-56561219   | 25.094  |
| Pou5f1        | 0 | 0 | 0 | 26   | 0.433333 | 0.095082 | 0.453517 | Unclassified | chr17:35640983-35647722   | 4.74    |
| Epstf1        | 0 | 0 | 0 | 578  | 9.633333 | 20.3228  | 11.14322 | Unclassified | chr14:78302197-78402459   | 98.263  |
| Dnajc9        | 0 | 0 | 0 | 382  | 6.366667 | 45.2128  | 9.064153 | Unclassified | chr14:21203859-21210132   | 4.274   |
| Map3k7ip2     | 0 | 0 | 0 | 1351 | 22.51667 | 14.3772  | 19.27936 | Unclassified | chr10:7625445-7677921     | 50.477  |
| Fam114a1      | 0 | 0 | 0 | 273  | 4.55     | 0.60626  | 14.97715 | Stalled      | chr5:65359313-65433140    | 71.828  |
| Kdelc2        | 0 | 0 | 0 | 108  | 1.8      | 0.601327 | 19.77821 | Stalled      | chr9:53190127-53209972    | 17.846  |
| Fndc1         | 0 | 0 | 0 | 81   | 1.35     | 0.030693 | 0        | Unclassified | chr17:7931432-7999839     | 66.408  |
| Tmeff2        | 0 | 0 | 0 | 144  | 2.4      | 0.234141 | 1.9516   | Unclassified | chr1:50982366-51244114    | 259.749 |
| Rrp12         | 0 | 0 | 0 | 866  | 14.43333 | 13.2205  | 8.261241 | Unclassified | chr19:41937340-41972643   | 33.304  |
| Atxn1l        | 0 | 0 | 0 | 357  | 5.95     | 4.26009  | 3.981286 | Unclassified | chr8:112250350-112263639  | 11.29   |
| Dach1         | 0 | 0 | 0 | 166  | 2.766667 | 0.227554 | 1.404081 | Unclassified | chr14:98186065-98570762   | 382.698 |
| Daf2          | 0 | 0 | 0 | 12   | 0.2      | 2.25424  | 2.42131  | Unclassified | chr1:132285104-132321576  | 34.473  |
| Cd55          | 0 | 0 | 0 | 152  | 2.533333 | 5.4452   | 19.06865 | Stalled      | chr1:132335606-132361317  | 23.712  |
| Dab1          | 0 | 0 | 0 | 268  | 4.466667 | 0.087137 | 1.171706 | Unclassified | chr4:104038164-104417447  | 377.284 |
| Dab2          | 0 | 0 | 0 | 91   | 1.516667 | 0.128163 | 0.611221 | Unclassified | chr15:6247788-6390709     | 140.922 |
| Hdhd3         | 0 | 0 | 0 | 168  | 2.8      | 1.63278  | 12.2753  | Stalled      | chr4:62160087-62165234    | 3.148   |
| Chrna1        | 0 | 0 | 0 | 46   | 0.766667 | 0.059778 | 1.405212 | Unclassified | chr2:73401337-73420363    | 17.027  |
| Dgka          | 0 | 0 | 0 | 225  | 3.75     | 13.0287  | 5.333116 | Unclassified | chr10:128157191-128183112 | 23.922  |
| Ankrd35       | 0 | 0 | 0 | 41   | 0.683333 | 0.481897 | 4.47715  | Unclassified | chr3:96472053-96494957    | 20.905  |
| Olfr70        | 0 | 0 | 0 | 11   | 0.183333 | 0.016347 | 0.814464 | Unclassified | chr4:43707871-43715679    | 5.809   |
| Khdc1a        | 0 | 0 | 0 | 0    | 0        | 0.016594 | 0        | Unclassified | chr1:21337757-21342280    | 2.524   |
| 9430007A20Rik | 0 | 0 | 0 | 11   | 0.183333 | 0.027346 | 0.460422 | Unclassified | chr4:144107724-144119256  | 9.533   |
| A530054K11Rik | 0 | 0 | 0 | 186  | 3.1      | 1.37356  | 23.94319 | Stalled      | chr13:67717937-67740690   | 20.754  |
| Frk           | 0 | 0 | 0 | 54   | 0.9      | 0.029377 | 0        | Unclassified | chr10:34201205-34331032   | 127.828 |
| Arap2         | 0 | 0 | 0 | 2148 | 35.8     | 5.56508  | 10.75428 | Unclassified | chr5:62993684-63159416    | 163.733 |
| Olfr59        | 0 | 0 | 0 | 6    | 0.1      | 0.03801  | 0        | Unclassified | chr11:74095310-74103148   | 5.839   |
| Olfr54        | 0 | 0 | 0 | 1    | 0.016667 | 0.027211 | 1        | Unclassified | chr11:50838505-50841447   | 0.943   |
| Olfr57        | 0 | 0 | 0 | 3    | 0.05     | 0.02001  | 3        | Unclassified | chr10:78495542-78498502   | 0.961   |
| Mas1          | 0 | 0 | 0 | 32   | 0.533333 | 0.021352 | 0.456769 | Unclassified | chr17:13033944-13063009   | 27.066  |
| Olfr51        | 0 | 0 | 0 | 0    | 0        | 0.023609 | 0        | Unclassified | chr11:50818475-50821399   | 0.925   |
| Pdzklip1      | 0 | 0 | 0 | 9    | 0.15     | 0.636271 | 1.367258 | Unclassified | chr4:114759312-114766498  | 5.187   |
| Ppie          | 0 | 0 | 0 | 405  | 6.75     | 19.1888  | 13.99197 | Unclassified | chr4:122804367-122819184  | 12.818  |
| Exoc4         | 0 | 0 | 0 | 2794 | 46.56667 | 8.82296  | 15.9741  | Stalled      | chr6:33197149-33922930    | 723.782 |
| Ncam2         | 0 | 0 | 0 | 177  | 2.95     | 0.095646 | 2.132178 | Unclassified | chr16:81198941-81624532   | 423.592 |
| Olfr319       | 0 | 0 | 0 | 0    | 0        | 0.039247 | 0        | Unclassified | chr11:58513204-58516125   | 0.922   |
| Ncam1         | 0 | 0 | 0 | 255  | 4.25     | 0.195727 | 1.080166 | Unclassified | chr9:49310250-49609174    | 296.925 |
| Pcdhb6        | 0 | 0 | 0 | 1    | 0.016667 | 0.025987 | 0        | Unclassified | chr18:37491681-37496000   | 2.32    |
| Adam30        | 0 | 0 | 0 | 3    | 0.05     | 0        | 2        | Unclassified | chr3:97962734-97967096    | 2.363   |
| Nat2          | 0 | 0 | 0 | 106  | 1.766667 | 3.93323  | 3.237398 | Unclassified | chr8:70016846-70026475    | 7.63    |
| Slc25a30      | 0 | 0 | 0 | 426  | 7.1      | 2.52337  | 44.96646 | Stalled      | chr14:76161805-76188844   | 25.04   |
| 4933434I20Rik | 0 | 0 | 0 | 31   | 0.516667 | 0.01984  | 0        | Unclassified | chr8:85870370-85903301    | 30.932  |
| Gpr61         | 0 | 0 | 0 | 22   | 0.366667 | 0.045201 | 0.452958 | Unclassified | chr3:107951238-107959800  | 6.563   |
| Larp6         | 0 | 0 | 0 | 30   | 0.5      | 0.072189 | 1.620901 | Unclassified | chr9:60558927-60586608    | 25.682  |
| Tbpl1         | 0 | 0 | 0 | 666  | 11.1     | 7.04311  | 30.48735 | Unclassified | chr10:22423684-22453253   | 27.57   |
| L3mbt13       | 0 | 0 | 0 | 357  | 5.95     | 1.32979  | 14.75173 | Stalled      | chr10:25995257-26096991   | 99.735  |
| Zfp212        | 0 | 0 | 0 | 288  | 4.8      | 5.28316  | 14.49898 | Unclassified | chr6:47868566-47882626    | 12.061  |
| 1700010I14Rik | 0 | 0 | 0 | 126  | 2.1      | 1.25524  | 9.28426  | Unclassified | chr17:9179197-9201184     | 19.988  |
| Dcbl1         | 0 | 0 | 0 | 355  | 5.916667 | 3.50289  | 13.33833 | Stalled      | chr10:51951424-52041183   | 87.76   |
| Gm5111        | 0 | 0 | 0 | 7    | 0.116667 | 0.05318  | 2        | Unclassified | chr6:48537443-48540583    | 1.141   |
| Tcea18        | 0 | 0 | 0 | 5    | 0.083333 | 0.567965 | 0.531506 | Unclassified | chrX:132703522-132708790  | 3.269   |
| Zfp786        | 0 | 0 | 0 | 127  | 2.116667 | 0.566166 | 14.56731 | Stalled      | chr6:47769264-47782504    | 11.241  |
| 1700029G01Rik | 0 | 0 | 0 | 325  | 5.416667 | 1.24972  | 13.97215 | Stalled      | chr4:125827846-125841909  | 12.064  |
| Aipl1         | 0 | 0 | 0 | 13   | 0.216667 | 0.563265 | 1.05335  | Unclassified | chr11:71842223-71853011   | 8.789   |
| Dcun1d1       | 0 | 0 | 0 | 289  | 4.816667 | 3.67468  | 1.280398 | Unclassified | chr3:35791902-35830996    | 37.095  |
| Eif3m         | 0 | 0 | 0 | 447  | 7.45     | 31.4172  | 15.51143 | Unclassified | chr2:104839813-104859184  | 17.372  |
| Cfnf          | 0 | 0 | 0 | 12   | 0.2      | 0.284237 | 0.624473 | Unclassified | chr7:26152634-26156743    | 2.11    |
| Lrfn4         | 0 | 0 | 0 | 85   | 1.416667 | 1.24274  | 3.858898 | Unclassified | chr19:4611784-4617667     | 3.884   |
| Gm10136       | 0 | 0 | 0 | 6    | 0.1      | 100.745  | 3        | Unclassified | chr19:29077852-29080365   | 0.514   |
| Ociad2        | 0 | 0 | 0 | 71   | 1.183333 | 1.08597  | 3.53947  | Unclassified | chr5:73713437-73731878    | 16.442  |
| 2210409E12Rik | 0 | 0 | 0 | 0    | 0        | 0.071929 | 0        | Unclassified | chr11:88831951-88834328   | 0.378   |
| Sult5a1       | 0 | 0 | 0 | 34   | 0.566667 | 0.121534 | 0.324857 | Unclassified | chr8:125666746-125684180  | 15.435  |
| Iqsec2        | 0 | 0 | 0 | 85   | 1.416667 | 0.942765 | 3.589088 | Unclassified | chrX:148576810-148659779  | 80.97   |
| Cd1d2         | 0 | 0 | 0 | 12   | 0.2      | 2.27073  | 12       | Unclassified | chr3:86788507-86793454    | 2.948   |
| Pde6a         | 0 | 0 | 0 | 166  | 2.766667 | 0.073264 | 1.817442 | Unclassified | chr18:61378152-61449372   | 69.221  |
| Olfr384       | 0 | 0 | 0 | 0    | 0        | 0.020425 | 0        | Unclassified | chr11:73414083-73417022   | 0.94    |
| Tmem57        | 0 | 0 | 0 | 585  | 9.75     | 8.22798  | 17.39621 | Unclassified | chr4:134358677-134411260  | 50.584  |
| Tmem98        | 0 | 0 | 0 | 10   | 0.166667 | 0.147208 | 1.277978 | Unclassified | chr11:80621916-80635535   | 11.62   |
| Spink8        | 0 | 0 | 0 | 16   | 0.266667 | 0.037751 | 0.818289 | Unclassified | chr9:109717140-109729141  | 10.002  |
| Sh3tc2        | 0 | 0 | 0 | 64   | 1.066667 | 0.019761 | 1.520297 | Unclassified | chr18:62110728-62175373   | 62.646  |
| Gpsm3         | 0 | 0 | 0 | 151  | 2.516667 | 37.4685  | 2.361771 | Elongating   | chr17:34724750-34728698   | 1.949   |
| Dcxr          | 0 | 0 | 0 | 61   | 1.016667 | 12.4642  | 8.006768 | Unclassified | chr11:120586686-120590595 | 1.91    |
| Mdp1          | 0 | 0 | 0 | 147  | 2.45     | 18.4096  | 7.307715 | Unclassified | chr14:56276717-56281345   | 2.629   |
| 1700054O13Rik | 0 | 0 | 0 | 1    | 0.016667 | 0        | 1        | Unclassified | chrX:9422072-9424626      | 0.555   |
| Cep68         | 0 | 0 | 0 | 1109 | 18.48333 | 7.07326  | 4.978163 | Unclassified | chr11:20127039-20151427   | 22.389  |
| Des           | 0 | 0 | 0 | 22   | 0.366667 | 0.080339 | 3.113907 | Unclassified | chr1:75354918-75364290    | 7.373   |
| Tmem100       | 0 | 0 | 0 | 47   | 0.783333 | 0.523115 | 7.287238 | Unclassified | chr11:89889661-89897819   | 6.159   |
| Rbm18         | 0 | 0 | 0 | 437  | 7.283333 | 3.82103  | 18.87655 | Unclassified | chr2:35971598-35994224    | 20.627  |
| Tctex1d2      | 0 | 0 | 0 | 133  | 2.216667 | 9.61612  | 20.6932  | Stalled      | chr16:32417787-32428978   | 9.192   |
| Trib2         | 0 | 0 | 0 | 394  | 6.566667 | 7.38299  | 9.483982 | Unclassified | chr12:15798532-15825591   | 25.06   |
| Gtpbbp8       | 0 | 0 | 0 | 239  | 3.983333 | 8.848    | 12.88803 | Unclassified | chr16:44738993-44748476   | 7.484   |
| Gpr179        | 0 | 0 | 0 | 62   | 1.033333 | 0.135403 | 1.011979 | Unclassified | chr11:97193422-97215387   | 19.966  |
| Gm13011       | 0 | 0 | 0 | 10   | 0.166667 | 0.033366 | 0.475031 | Unclassified | chr4:136957468-136967706  | 8.239   |
| Grm4          | 0 | 0 | 0 | 163  | 2.716667 | 0.023689 | 0.668999 | Unclassified | chr17:27559332-27642249   | 80.918  |



|               |   |   |   |      |          |          |          |              |                           |         |
|---------------|---|---|---|------|----------|----------|----------|--------------|---------------------------|---------|
| Scube3        | 0 | 0 | 0 | 76   | 1.266667 | 0.017192 | 0.275944 | Unclassified | chr17:28277470-28308290   | 28.821  |
| Pkmyt1        | 0 | 0 | 0 | 508  | 8.466667 | 16.8605  | 17.04102 | Unclassified | chr17:23861302-23873696   | 10.395  |
| Ech1          | 0 | 0 | 0 | 172  | 2.866667 | 16.3379  | 7.851822 | Unclassified | chr7:29608356-29617258    | 6.903   |
| Srrm1         | 0 | 0 | 0 | 1503 | 25.05    | 34.0428  | 10.17794 | Unclassified | chr4:134876398-134911129  | 32.732  |
| Fchsdl        | 0 | 0 | 0 | 192  | 3.2      | 1.96757  | 19.53519 | Stalled      | chr18:38117087-38131385   | 12.299  |
| Ddah2         | 0 | 0 | 0 | 440  | 7.333333 | 11.8621  | 13.36568 | Unclassified | chr17:35194045-35199040   | 2.996   |
| Pich1         | 0 | 0 | 0 | 118  | 1.966667 | 0.010243 | 0.567953 | Unclassified | chr3:63500158-63656961    | 154.804 |
| Zfp711        | 0 | 0 | 0 | 12   | 0.2      | 0.029599 | 0        | Unclassified | chrX:109712134-109748671  | 34.538  |
| Hdx           | 0 | 0 | 0 | 23   | 0.383333 | 0.024063 | 0        | Unclassified | chrX:108688812-108812688  | 121.877 |
| 4921511C20Rik | 0 | 0 | 0 | 0    | 0        | 0.015961 | 0        | Unclassified | chrX:123928824-123930430  | 1.607   |
| Aass          | 0 | 0 | 0 | 32   | 0.533333 | 0.031242 | 1.331893 | Unclassified | chr6:23022169-23084974    | 60.806  |
| Cbx8          | 0 | 0 | 0 | 113  | 1.883333 | 4.38814  | 23.28415 | Stalled      | chr11:118899749-118904227 | 2.479   |
| Cngb3         | 0 | 0 | 0 | 105  | 1.75     | 0.043556 | 0.687477 | Unclassified | chr4:19205996-19437770    | 229.775 |
| Schip1        | 0 | 0 | 0 | 512  | 8.533333 | 0        | 0        | Unclassified | chr3:67694153-68430404    | 734.252 |
| McpH1         | 0 | 0 | 0 | 2218 | 36.96667 | 3.67732  | 31.58029 | Unclassified | chr8:18593172-18803188    | 208.017 |
| Ndufaf4       | 0 | 0 | 0 | 234  | 3.9      | 5.54594  | 9.520468 | Unclassified | chr4:24823229-24832148    | 6.92    |
| Tex28         | 0 | 0 | 0 | 5    | 0.083333 | 0        | 0        | Unclassified | chrX:71396282-71415177    | 16.896  |
| Leo1          | 0 | 0 | 0 | 604  | 10.06667 | 15.7268  | 10.25726 | Unclassified | chr9:75287330-75314239    | 24.91   |
| Gk5           | 0 | 0 | 0 | 319  | 5.316667 | 1.8702   | 51.33704 | Stalled      | chr9:96017847-96083372    | 63.526  |
| Cd28          | 0 | 0 | 0 | 42   | 0.7      | 0.219691 | 5.39337  | Unclassified | chr1:60801231-60830203    | 26.973  |
| Rnf10         | 0 | 0 | 0 | 949  | 15.81667 | 41.777   | 10.49785 | Unclassified | chr5:115691779-115724904  | 31.126  |
| Ifitm3        | 0 | 0 | 0 | 22   | 0.366667 | 8.38133  | 20       | Unclassified | chr7:148195488-148198643  | 1.156   |
| Uroc1         | 0 | 0 | 0 | 37   | 0.616667 | 0.07243  | 0.927384 | Unclassified | chr6:90281282-90314542    | 31.261  |
| Tceal7        | 0 | 0 | 0 | 2    | 0.033333 | 0        | 0        | Unclassified | chrX:132756579-132760639  | 2.061   |
| Ifitd1        | 0 | 0 | 0 | 55   | 0.916667 | 0.075194 | 0        | Unclassified | chr6:145345754-145385445  | 37.692  |
| Cica4         | 0 | 0 | 0 | 15   | 0.25     | 0.024836 | 0        | Unclassified | chr3:144485586-144514266  | 26.681  |
| Igsf3         | 0 | 0 | 0 | 130  | 2.166667 | 0.149493 | 2.462692 | Unclassified | chr3:101179047-101266983  | 85.937  |
| Tnfsf15       | 0 | 0 | 0 | 31   | 0.516667 | 0.134145 | 1.232026 | Unclassified | chr4:63385636-63408147    | 20.512  |
| Wrnip1        | 0 | 0 | 0 | 368  | 6.133333 | 22.0044  | 19.16593 | Unclassified | chr13:32891898-32914479   | 20.582  |
| Aldh1b1       | 0 | 0 | 0 | 99   | 1.65     | 5.23822  | 8.15076  | Unclassified | chr4:45809893-45817480    | 5.588   |
| 9130017N09Rik | 0 | 0 | 0 | 51   | 0.85     | 0.07393  | 3.428746 | Unclassified | chr10:79281765-79293197   | 9.433   |
| Cbin3         | 0 | 0 | 0 | 191  | 3.183333 | 0.130253 | 5.044804 | Unclassified | chr14:56497756-56505093   | 5.338   |
| Tex13         | 0 | 0 | 0 | 3    | 0.05     | 0.045419 | 0.673629 | Unclassified | chrX:137342845-137349972  | 5.128   |
| Diap3         | 0 | 0 | 0 | 2128 | 35.46667 | 3.66287  | 23.18815 | Stalled      | chr14:87056129-87542921   | 484.793 |
| Ykt6          | 0 | 0 | 0 | 508  | 8.466667 | 36.2094  | 16.45697 | Unclassified | chr11:5853834-5867783     | 11.95   |
| Bcl2a1c       | 0 | 0 | 0 | 2    | 0.033333 | 5.15022  | 0        | Unclassified | chr9:114237252-114239696  | 0.445   |
| Zfp780b       | 0 | 0 | 0 | 198  | 3.3      | 0.928474 | 15.54763 | Stalled      | chr7:28744818-28766176    | 19.359  |
| Pom121        | 0 | 0 | 0 | 854  | 14.23333 | 16.2013  | 5.958858 | Unclassified | chr5:135852009-135872416  | 18.408  |
| Sfrs17b       | 0 | 0 | 0 | 141  | 2.35     | 1.12033  | 13.79044 | Stalled      | chrX:34148177-34187409    | 37.233  |
| 1700074P13Rik | 0 | 0 | 0 | 10   | 0.166667 | 0        | 0        | Unclassified | chr6:40870458-40892556    | 20.099  |
| Rusc2         | 0 | 0 | 0 | 74   | 1.233333 | 0.209488 | 3.204621 | Unclassified | chr4:43392853-43439958    | 45.106  |
| Plekhh2       | 0 | 0 | 0 | 479  | 7.983333 | 8.45061  | 12.90501 | Unclassified | chr1:34904803-34936430    | 29.628  |
| Ptprb         | 0 | 0 | 0 | 78   | 1.3      | 0.045189 | 0.537511 | Unclassified | chr10:115736429-115826594 | 88.166  |
| Zfp768        | 0 | 0 | 0 | 70   | 1.166667 | 1.81902  | 2.149457 | Unclassified | chr7:134486308-134490828  | 2.521   |
| Zfp764        | 0 | 0 | 0 | 153  | 2.55     | 5.585    | 13.95615 | Stalled      | chr7:134547181-134552336  | 3.156   |
| Prr14         | 0 | 0 | 0 | 354  | 5.9      | 14.3499  | 6.088344 | Unclassified | chr7:134613127-134620272  | 5.146   |
| Ptprd         | 0 | 0 | 0 | 311  | 5.183333 | 0.030046 | 0.677775 | Unclassified | chr4:75587142-76242203    | 653.062 |
| Lag3          | 0 | 0 | 0 | 100  | 1.666667 | 5.51032  | 1.828939 | Elongating   | chr6:124854377-124863723  | 7.347   |
| Stmn1         | 0 | 0 | 0 | 572  | 9.533333 | 74.4841  | 9.940665 | Unclassified | chr4:134022234-134029757  | 5.524   |
| Ptprf         | 0 | 0 | 0 | 143  | 2.383333 | 0.036867 | 1.49984  | Unclassified | chr4:117880817-117966002  | 83.186  |
| Cacnb2        | 0 | 0 | 0 | 379  | 6.316667 | 0.50045  | 10.37558 | Stalled      | chr2:14523932-14908560    | 382.629 |
| Tyro3         | 0 | 0 | 0 | 82   | 1.366667 | 1.42038  | 2.837575 | Unclassified | chr2:119623249-119643839  | 18.591  |
| Gm14410       | 0 | 0 | 0 | 7    | 0.116667 | 0        | 2.349205 | Unclassified | chr2:176975691-176993129  | 15.439  |
| Tyr           | 0 | 0 | 0 | 33   | 0.55     | 0.011627 | 1.368474 | Unclassified | chr7:94575914-94643921    | 66.008  |
| Afp           | 0 | 0 | 0 | 14   | 0.233333 | 0.215039 | 0.569465 | Unclassified | chr5:90917739-90937933    | 18.195  |
| Cacna2d3      | 0 | 0 | 0 | 609  | 10.15    | 0.038154 | 1.723874 | Unclassified | chr14:29718128-30537050   | 816.923 |
| Tyrp1         | 0 | 0 | 0 | 11   | 0.183333 | 0.028271 | 0        | Unclassified | chr4:80478133-80497622    | 17.49   |
| Ngfrap1       | 0 | 0 | 0 | 13   | 0.216667 | 53.0779  | 0.380828 | Unclassified | chrX:132802791-132806517  | 1.727   |
| Snx24         | 0 | 0 | 0 | 237  | 3.95     | 0.429027 | 5.512023 | Unclassified | chr18:53403315-53550479   | 145.165 |
| 2810407C02Rik | 0 | 0 | 0 | 573  | 9.55     | 11.9458  | 18.84064 | Unclassified | chr3:58378579-58397466    | 16.888  |
| Camta1        | 0 | 0 | 0 | 2260 | 37.66667 | 0.641078 | 37.8369  | Stalled      | chr4:150433632-151237866  | 802.235 |
| Ttl           | 0 | 0 | 0 | 182  | 3.033333 | 2.64572  | 21.62106 | Stalled      | chr2:128889682-128922019  | 30.338  |
| Ptprh         | 0 | 0 | 0 | 38   | 0.633333 | 0.025596 | 0.601898 | Unclassified | chr7:4500215-4557643      | 55.429  |
| Gm12888       | 0 | 0 | 0 | 4    | 0.066667 | 0.067267 | 0        | Unclassified | chr4:120988920-120999522  | 8.603   |
| Cldn18        | 0 | 0 | 0 | 10   | 0.166667 | 0.023001 | 0.669336 | Unclassified | chr9:99591217-99612434    | 19.218  |
| Ccdc158       | 0 | 0 | 0 | 50   | 0.833333 | 0.044056 | 2.354704 | Unclassified | chr5:93037320-93106153    | 66.834  |
| Nhsl1         | 0 | 0 | 0 | 120  | 2        | 0.249451 | 0.514839 | Unclassified | chr10:18125480-18253697   | 126.218 |
| Dlgap3        | 0 | 0 | 0 | 137  | 2.283333 | 0.62145  | 1.3145   | Unclassified | chr4:126848123-126914265  | 64.143  |
| Serpinb13     | 0 | 0 | 0 | 10   | 0.166667 | 0        | 0        | Unclassified | chr1:108875560-108897772  | 20.213  |
| Gmeb2         | 0 | 0 | 0 | 866  | 14.43333 | 5.78115  | 30.36574 | Unclassified | chr2:180986155-181024671  | 36.517  |
| Timeless      | 0 | 0 | 0 | 844  | 14.06667 | 10.6965  | 13.7412  | Unclassified | chr10:127667118-127689988 | 20.871  |
| Ttll10        | 0 | 0 | 0 | 27   | 0.45     | 0.346681 | 0.374719 | Unclassified | chr4:155408945-155426926  | 15.982  |
| Timp1         | 0 | 0 | 0 | 6    | 0.1      | 0.115593 | 0        | Unclassified | chrX:20445291-20451863    | 4.573   |
| Timm44        | 0 | 0 | 0 | 703  | 11.71667 | 30.7418  | 7.001746 | Unclassified | chr8:4259730-4277905      | 16.176  |
| Timm17b       | 0 | 0 | 0 | 262  | 4.366667 | 18.0723  | 41.93975 | Stalled      | chrX:7474523-7484778      | 8.256   |
| Tead1         | 0 | 0 | 0 | 301  | 5.016667 | 0.078494 | 1.743919 | Unclassified | chr7:119820833-120050317  | 227.485 |
| Timp3         | 0 | 0 | 0 | 68   | 1.133333 | 0.172491 | 0.8737   | Unclassified | chr10:85761156-85812250   | 49.095  |
| Sry           | 0 | 0 | 0 | 0    | 0        | 0        | 0        | Unclassified | chrY:1918380-1921568      | 1.189   |
| Olfir951      | 0 | 0 | 0 | 0    | 0        | 0.02706  | 0        | Unclassified | chr9:39199377-39202322    | 0.946   |
| Ankrd53       | 0 | 0 | 0 | 115  | 1.916667 | 0.619788 | 0.593397 | Unclassified | chr6:83710639-83718320    | 5.682   |
| Rif           | 0 | 0 | 0 | 299  | 4.983333 | 2.48125  | 1.040538 | Unclassified | chr4:120817977-120863139  | 43.163  |
| Lce3b         | 0 | 0 | 0 | 1    | 0.016667 | 0.022846 | 1        | Unclassified | chr3:92734900-92738018    | 1.119   |
| Fam19a4       | 0 | 0 | 0 | 150  | 2.5      | 0.152715 | 0        | Unclassified | chr6:96781202-97012405    | 229.204 |
| Kbtbd10       | 0 | 0 | 0 | 19   | 0.316667 | 0.051536 | 0.483795 | Unclassified | chr2:69506176-69522296    | 14.121  |
| Atp2b3        | 0 | 0 | 0 | 58   | 0.966667 | 0.045742 | 0        | Unclassified | chrX:70746424-70816344    | 67.921  |
| Bend6         | 0 | 0 | 0 | 89   | 1.483333 | 0.693224 | 0.38821  | Unclassified | chr1:33908896-33966466    | 55.571  |

|                      |   |   |   |      |          |          |          |              |                           |         |
|----------------------|---|---|---|------|----------|----------|----------|--------------|---------------------------|---------|
| <b>Tmem117</b>       | 0 | 0 | 0 | 296  | 4.933333 | 0.036868 | 1.226228 | Unclassified | chr15:94457615-94926528   | 466.914 |
| <b>Osgin2</b>        | 0 | 0 | 0 | 445  | 7.416667 | 3.01633  | 26.95875 | Unclassified | chr4:15924267-15943024    | 16.758  |
| <b>Olfr1480</b>      | 0 | 0 | 0 | 0    | 0        | 0.0163   | 0        | Unclassified | chr19:13602164-13605112   | 0.949   |
| <b>Sap30bp</b>       | 0 | 0 | 0 | 1025 | 17.08333 | 16.4196  | 5.509508 | Unclassified | chr11:115792972-115826848 | 31.877  |
| <b>Actn2</b>         | 0 | 0 | 0 | 92   | 1.533333 | 0.112554 | 3.645045 | Unclassified | chr13:12361693-12434999   | 71.307  |
| <b>Clca2</b>         | 0 | 0 | 0 | 17   | 0.283333 | 0.036496 | 0.578226 | Unclassified | chr3:144459524-144484458  | 22.935  |
| <b>Actl7a</b>        | 0 | 0 | 0 | 67   | 1.116667 | 0        | 0.356401 | Unclassified | chr4:56754293-56757797    | 1.505   |
| <b>Actl7b</b>        | 0 | 0 | 0 | 19   | 0.316667 | 0.018039 | 0.986558 | Unclassified | chr4:56752876-56756297    | 1.422   |
| <b>Olfr1198</b>      | 0 | 0 | 0 | 2    | 0.033333 | 0        | 1        | Unclassified | chr2:88586116-88589043    | 0.928   |
| <b>Eid2</b>          | 0 | 0 | 0 | 13   | 0.216667 | 1.98016  | 2.242048 | Unclassified | chr7:29050899-29054187    | 1.289   |
| <b>Olfr1365</b>      | 0 | 0 | 0 | 1    | 0.016667 | 0.078387 | 0        | Unclassified | chr13:21646908-21649889   | 0.982   |
| <b>Olfr1380</b>      | 0 | 0 | 0 | 0    | 0        | 0        | 0        | Unclassified | chr11:49375424-49378360   | 0.937   |
| <b>Olfr1383</b>      | 0 | 0 | 0 | 1    | 0.016667 | 0.026155 | 1        | Unclassified | chr11:49335226-49338162   | 0.937   |
| <b>Nmt2</b>          | 0 | 0 | 0 | 484  | 8.066667 | 5.25061  | 30.21237 | Stalled      | chr2:3199559-3243641      | 42.083  |
| <b>Fgl1</b>          | 0 | 0 | 0 | 17   | 0.283333 | 0        | 0.58682  | Unclassified | chr8:42276787-42302510    | 23.724  |
| <b>Gypa</b>          | 0 | 0 | 0 | 14   | 0.233333 | 0.105224 | 0        | Unclassified | chr8:83015943-83034684    | 16.742  |
| <b>Fat4</b>          | 0 | 0 | 0 | 99   | 1.65     | 0.093848 | 4.702125 | Unclassified | chr3:38783861-38910905    | 125.045 |
| <b>Znrf2</b>         | 0 | 0 | 0 | 767  | 12.78333 | 5.9843   | 29.28069 | Unclassified | chr6:54764909-54839730    | 72.822  |
| <b>Med19</b>         | 0 | 0 | 0 | 272  | 4.533333 | 6.87671  | 12.58979 | Unclassified | chr2:84516558-84528371    | 9.814   |
| <b>Col7a1</b>        | 0 | 0 | 0 | 108  | 1.8      | 0.222941 | 1.741274 | Unclassified | chr9:108853789-108886920  | 31.132  |
| <b>Sytl5</b>         | 0 | 0 | 0 | 19   | 0.316667 | 0.066839 | 0        | Unclassified | chrX:9460747-9571669      | 108.923 |
| <b>Magea8</b>        | 0 | 0 | 0 | 1    | 0.016667 | 0.010989 | 0        | Unclassified | chrX:151420317-151432393  | 10.077  |
| <b>Gnl2</b>          | 0 | 0 | 0 | 720  | 12       | 18.581   | 11.87887 | Unclassified | chr4:124705257-124732626  | 25.37   |
| <b>Magea4</b>        | 0 | 0 | 0 | 2    | 0.033333 | 0        | 2        | Unclassified | chrX:69465355-69468302    | 0.948   |
| <b>Magea5</b>        | 0 | 0 | 0 | 4    | 0.066667 | 0        | 0.714122 | Unclassified | chrX:151487603-151498096  | 8.494   |
| <b>Magea6</b>        | 0 | 0 | 0 | 0    | 0        | 0        | 0        | Unclassified | chrX:151358554-151362658  | 2.105   |
| <b>Zfp317</b>        | 0 | 0 | 0 | 221  | 3.683333 | 2.0827   | 27.15344 | Stalled      | chr9:19424534-19454174    | 27.641  |
| <b>4933417A18Rik</b> | 0 | 0 | 0 | 26   | 0.433333 | 0.089161 | 1.073126 | Unclassified | chr13:35014277-35045063   | 28.787  |
| <b>Dnajc25</b>       | 0 | 0 | 0 | 238  | 3.966667 | 5.27034  | 20.57686 | Stalled      | chr4:59014064-59036269    | 20.206  |
| <b>Fam108c</b>       | 0 | 0 | 0 | 531  | 8.85     | 8.40598  | 7.894025 | Unclassified | chr7:91257865-91302403    | 42.539  |
| <b>Jkamp</b>         | 0 | 0 | 0 | 244  | 4.066667 | 3.91963  | 19.74654 | Stalled      | chr12:73185109-73201829   | 14.721  |
| <b>Abtb1</b>         | 0 | 0 | 0 | 181  | 3.016667 | 6.7477   | 6.390682 | Unclassified | chr6:88785907-88793929    | 6.023   |
| <b>Aldh6a1</b>       | 0 | 0 | 0 | 224  | 3.733333 | 0.661514 | 32.1465  | Stalled      | chr12:85771667-85793900   | 20.234  |
| <b>Pds5b</b>         | 0 | 0 | 0 | 947  | 15.78333 | 5.44208  | 14.89148 | Unclassified | chr5:151474401-151613245  | 136.845 |
| <b>Tmem177</b>       | 0 | 0 | 0 | 191  | 3.183333 | 1.41386  | 10.73882 | Unclassified | chr1:121804477-121811745  | 5.269   |
| <b>Lysmd3</b>        | 0 | 0 | 0 | 263  | 4.383333 | 2.65663  | 16.23681 | Unclassified | chr13:81794804-81810889   | 14.086  |
| <b>Fam13a</b>        | 0 | 0 | 0 | 76   | 1.266667 | 0.346224 | 3.374475 | Unclassified | chr6:58883529-58976496    | 90.968  |
| <b>Grpr</b>          | 0 | 0 | 0 | 7    | 0.116667 | 0.025705 | 0        | Unclassified | chrX:159951835-159989579  | 35.745  |
| <b>4933425O20Rik</b> | 0 | 0 | 0 | 18   | 0.3      | 0.157532 | 0.585828 | Unclassified | chr2:130230257-130233530  | 1.274   |
| <b>Grm8</b>          | 0 | 0 | 0 | 448  | 7.466667 | 0.090503 | 4.670748 | Unclassified | chr6:27225120-28086369    | 859.25  |
| <b>Cxcl1</b>         | 0 | 0 | 0 | 11   | 0.183333 | 0.406008 | 3.256684 | Unclassified | chr5:91318270-91322139    | 1.87    |
| <b>Rgs18</b>         | 0 | 0 | 0 | 17   | 0.283333 | 1.34437  | 3.213329 | Unclassified | chr1:146599970-146624551  | 22.582  |
| <b>Rab6b</b>         | 0 | 0 | 0 | 238  | 3.966667 | 0.533262 | 5.608641 | Unclassified | chr9:103012403-103087600  | 73.198  |
| <b>Amt</b>           | 0 | 0 | 0 | 40   | 0.666667 | 0.996019 | 0.285208 | Unclassified | chr9:108197252-108203928  | 4.677   |
| <b>Rhobtb2</b>       | 0 | 0 | 0 | 549  | 9.15     | 11.5698  | 6.427418 | Unclassified | chr14:70184796-70207352   | 20.557  |
| <b>Rps4x</b>         | 0 | 0 | 0 | 655  | 10.91667 | 206.793  | 1.273685 | Elongating   | chrX:99380281-99385710    | 3.43    |
| <b>Noxo1</b>         | 0 | 0 | 0 | 143  | 2.383333 | 0.439417 | 0.729189 | Unclassified | chr17:24833287-24837300   | 2.014   |
| <b>Fcgr4</b>         | 0 | 0 | 0 | 45   | 0.75     | 1.58894  | 1.97545  | Unclassified | chr1:172947056-172959892  | 10.837  |
| <b>Zfyve20</b>       | 0 | 0 | 0 | 534  | 8.9      | 4.61741  | 12.95455 | Unclassified | chr6:92136705-92166805    | 28.101  |
| <b>Gpr124</b>        | 0 | 0 | 0 | 192  | 3.2      | 0.202694 | 1.884021 | Unclassified | chr8:28194312-28233892    | 37.581  |
| <b>Setdb1</b>        | 0 | 0 | 0 | 587  | 9.783333 | 13.3717  | 1.720835 | Elongating   | chr3:95127447-95163124    | 33.678  |
| <b>Hamp</b>          | 0 | 0 | 0 | 52   | 0.866667 | 0.048677 | 11.0303  | Unclassified | chr7:31727387-31731036    | 1.65    |
| <b>Necab2</b>        | 0 | 0 | 0 | 120  | 2        | 0.149556 | 11.36684 | Stalled      | chr8:121968618-121996535  | 25.918  |
| <b>Zdhhc1</b>        | 0 | 0 | 0 | 154  | 2.566667 | 1.24153  | 13.46477 | Stalled      | chr8:107996324-108022770  | 24.447  |
| <b>Disp2</b>         | 0 | 0 | 0 | 42   | 0.7      | 0.071756 | 2.02629  | Unclassified | chr2:118603653-118620911  | 15.259  |
| <b>Ubr5</b>          | 0 | 0 | 0 | 1790 | 29.83333 | 14.9999  | 15.1227  | Unclassified | chr15:37897082-38010608   | 111.527 |
| <b>Gss</b>           | 0 | 0 | 0 | 254  | 4.233333 | 5.88632  | 19.30626 | Stalled      | chr2:155388918-155420442  | 29.525  |
| <b>Rnf26</b>         | 0 | 0 | 0 | 147  | 2.45     | 11.459   | 24.53954 | Stalled      | chr9:43918863-43923134    | 2.272   |
| <b>Zfp365</b>        | 0 | 0 | 0 | 123  | 2.05     | 0.855476 | 11.00337 | Stalled      | chr10:67348852-67377410   | 26.559  |
| <b>Zfp318</b>        | 0 | 0 | 0 | 297  | 4.95     | 1.92578  | 24.93325 | Stalled      | chr17:46518714-46557867   | 37.154  |
| <b>Nhedc2</b>        | 0 | 0 | 0 | 59   | 0.983333 | 0.119992 | 9.587584 | Unclassified | chr3:134968663-135005731  | 35.069  |
| <b>Crat</b>          | 0 | 0 | 0 | 580  | 9.666667 | 5.07051  | 15.70711 | Unclassified | chr2:30255995-30273268    | 15.274  |
| <b>Acot3</b>         | 0 | 0 | 0 | 9    | 0.15     | 0.473618 | 1.12396  | Unclassified | chr12:85391100-85400514   | 7.415   |
| <b>Apoc3</b>         | 0 | 0 | 0 | 3    | 0.05     | 0        | 0.55516  | Unclassified | chr9:46041133-46045380    | 2.248   |
| <b>Apod</b>          | 0 | 0 | 0 | 39   | 0.65     | 0.123896 | 0.651837 | Unclassified | chr16:31296277-31316682   | 18.406  |
| <b>Apoe</b>          | 0 | 0 | 0 | 166  | 2.766667 | 4.03619  | 4.176224 | Unclassified | chr7:20281592-20286515    | 2.924   |
| <b>Megf8</b>         | 0 | 0 | 0 | 114  | 1.9      | 0.201691 | 3.628925 | Unclassified | chr7:26100182-26150936    | 48.755  |
| <b>Apobec2</b>       | 0 | 0 | 0 | 263  | 4.383333 | 0.43142  | 0.233627 | Unclassified | chr17:48558555-48574053   | 13.499  |
| <b>Apoc1</b>         | 0 | 0 | 0 | 12   | 0.2      | 0        | 2.524426 | Unclassified | chr7:20274829-20280007    | 3.179   |
| <b>Apoc2</b>         | 0 | 0 | 0 | 10   | 0.166667 | 0.121867 | 1.250219 | Unclassified | chr7:20256927-20264213    | 5.287   |
| <b>Pax6</b>          | 0 | 0 | 0 | 54   | 0.9      | 0.155806 | 1.880305 | Unclassified | chr2:105514601-105537226  | 20.626  |
| <b>2210407C18Rik</b> | 0 | 0 | 0 | 8    | 0.133333 | 0        | 0        | Unclassified | chr11:58421707-58428994   | 5.288   |
| <b>Apoh</b>          | 0 | 0 | 0 | 11   | 0.183333 | 0        | 0        | Unclassified | chr11:108254610-108275710 | 19.101  |
| <b>Nr2f2</b>         | 0 | 0 | 0 | 26   | 0.433333 | 0.154634 | 0        | Unclassified | chr7:77496835-77513632    | 14.798  |
| <b>2510006D16Rik</b> | 0 | 0 | 0 | 517  | 8.616667 | 50.6866  | 11.50587 | Unclassified | chr4:129275950-129285123  | 7.174   |
| <b>Hccs</b>          | 0 | 0 | 0 | 171  | 2.85     | 5.76576  | 25.4581  | Stalled      | chrX:165749464-165760275  | 8.812   |
| <b>Phf10</b>         | 0 | 0 | 0 | 203  | 3.383333 | 18.6768  | 1.014567 | Unclassified | chr17:15082001-15100237   | 16.237  |
| <b>1810055G02Rik</b> | 0 | 0 | 0 | 286  | 4.766667 | 3.50013  | 14.84514 | Unclassified | chr19:3706332-3717881     | 9.55    |
| <b>Snip1</b>         | 0 | 0 | 0 | 443  | 7.383333 | 9.46688  | 11.76095 | Unclassified | chr4:124741936-124751289  | 7.354   |
| <b>Synn</b>          | 0 | 0 | 0 | 39   | 0.65     | 0.153266 | 0.913443 | Unclassified | chr7:74875046-74906628    | 29.583  |
| <b>Olfr965</b>       | 0 | 0 | 0 | 0    | 0        | 0        | 0        | Unclassified | chr9:39524813-39527752    | 0.94    |
| <b>Hmgb4</b>         | 0 | 0 | 0 | 4    | 0.066667 | 0        | 3        | Unclassified | chr4:127937455-127940139  | 0.685   |
| <b>Nol3</b>          | 0 | 0 | 0 | 32   | 0.533333 | 0.473176 | 0.414907 | Unclassified | chr8:107798346-107805839  | 5.494   |
| <b>Naa35</b>         | 0 | 0 | 0 | 321  | 5.35     | 5.46351  | 16.73543 | Stalled      | chr13:59684693-59736142   | 49.45   |
| <b>Hectd2</b>        | 0 | 0 | 0 | 57   | 0.95     | 0.1669   | 6.208459 | Unclassified | chr19:36627128-36695625   | 66.498  |
| <b>Ninl</b>          | 0 | 0 | 0 | 149  | 2.483333 | 0.369919 | 4.642538 | Unclassified | chr2:150760254-150837134  | 74.881  |

|          |   |          |   |      |          |          |          |              |                           |         |
|----------|---|----------|---|------|----------|----------|----------|--------------|---------------------------|---------|
| Cox7b2   | 0 | 0        | 0 | 39   | 0.65     | 0.047206 | 0        | Unclassified | chr5:71834061-71941444    | 105.384 |
| Ermp1    | 0 | 0        | 0 | 587  | 9.783333 | 5.39656  | 11.51806 | Unclassified | chr19:29684372-29724910   | 38.539  |
| Ugt3a1   | 0 | 0        | 0 | 14   | 0.233333 | 0.014233 | 0.724629 | Unclassified | chr15:9207583-9244791     | 35.209  |
| Cpt1b    | 0 | 0        | 0 | 99   | 1.65     | 0        | 3.927552 | Unclassified | chr15:89246835-89258293   | 9.459   |
| Cpt1a    | 0 | 0        | 0 | 446  | 7.433333 | 2.11246  | 19.63453 | Stalled      | chr19:3321300-3385733     | 62.434  |
| Cpt2     | 0 | 0        | 0 | 223  | 3.716667 | 6.99596  | 18.19618 | Stalled      | chr4:107576586-107598194  | 19.609  |
| Cpne6    | 0 | 0        | 0 | 9    | 0.15     | 0.099306 | 0        | Unclassified | chr14:56127284-56136267   | 6.984   |
| Cpox     | 0 | 0        | 0 | 569  | 9.483333 | 57.5235  | 7.245085 | Unclassified | chr16:58668320-58680502   | 10.183  |
| Gsta2    | 0 | 0        | 0 | 6    | 0.1      | 0.047556 | 0        | Unclassified | chr9:78178826-78196952    | 16.127  |
| Il17f    | 0 | 0        | 0 | 9    | 0.15     | 0.065445 | 1.100962 | Unclassified | chr1:20767229-20776351    | 7.123   |
| Fbxo38   | 0 | 0        | 0 | 788  | 13.13333 | 9.67935  | 20.48688 | Unclassified | chr18:62663712-62710397   | 44.686  |
| Trim31   | 0 | 0        | 0 | 12   | 0.2      | 0.079817 | 2.452098 | Unclassified | chr17:37033074-37047162   | 12.089  |
| H2-M10.5 | 0 | 0        | 0 | 1    | 0.016667 | 0        | 0        | Unclassified | chr17:36907854-36913180   | 3.327   |
| Tcfap2d  | 0 | 0        | 0 | 24   | 0.4      | 0.044194 | 1.478086 | Unclassified | chr1:19091102-19156406    | 63.305  |
| Olfr868  | 0 | 0        | 0 | 2    | 0.033333 | 0        | 0        | Unclassified | chr9:19901069-19906133    | 3.065   |
| Crabp2   | 0 | 0        | 0 | 42   | 0.7      | 0.312892 | 1.785239 | Unclassified | chr3:87750614-87757294    | 4.681   |
| Med7     | 0 | 0        | 0 | 425  | 7.083333 | 4.68055  | 11.29588 | Unclassified | chr11:46248448-46256223   | 5.776   |
| Atp2b4   | 0 | 0        | 0 | 75   | 1.25     | 0.198604 | 0.795956 | Unclassified | chr1:135600841-135652098  | 49.258  |
| Kif14    | 0 | 0        | 0 | 552  | 9.2      | 2.41976  | 1.477956 | Unclassified | chr1:138362534-138428088  | 63.555  |
| Rnf144a  | 0 | 0        | 0 | 417  | 6.95     | 1.365    | 9.452771 | Unclassified | chr12:26991662-27102121   | 108.46  |
| Ppm1e    | 0 | 0        | 0 | 512  | 8.533333 | 1.82627  | 4.241777 | Unclassified | chr11:87040407-87174496   | 132.09  |
| Abcb10   | 0 | 0        | 0 | 411  | 6.85     | 4.93717  | 21.51542 | Unclassified | chr8:126476358-126509022  | 30.665  |
| Pih1d1   | 0 | 0        | 0 | 567  | 9.45     | 21.192   | 22.42602 | Unclassified | chr7:52407767-52415434    | 5.668   |
| Tulp4    | 0 | 0        | 0 | 578  | 9.633333 | 1.51957  | 41.5021  | Stalled      | chr17:6104829-6240637     | 133.809 |
| Pr15a1   | 0 | 0        | 0 | 5    | 0.083333 | 0        | 0.669776 | Unclassified | chr13:28232352-28243464   | 9.113   |
| Tomm5    | 0 | 0        | 0 | 334  | 5.566667 | 47.4691  | 5.546473 | Unclassified | chr4:45118081-45122985    | 2.905   |
| Iffo2    | 0 | 0        | 0 | 585  | 9.75     | 2.72716  | 3.541427 | Unclassified | chr4:139129050-139176297  | 45.248  |
| Em1l     | 0 | 0        | 0 | 157  | 2.616667 | 0.135472 | 0.450532 | Unclassified | chr12:109646864-109777774 | 128.911 |
| Twistnb  | 0 | 0        | 0 | 241  | 4.016667 | 6.75665  | 13.53604 | Unclassified | chr12:34112488-34124245   | 9.758   |
| AU018091 | 0 | 0        | 0 | 11   | 0.183333 | 0.066926 | 1.257368 | Unclassified | chr7:3154660-3171204      | 14.545  |
| Siae     | 0 | 0        | 0 | 113  | 1.883333 | 1.38836  | 12.73942 | Stalled      | chr9:37419431-37455903    | 34.473  |
| Crabp1   | 0 | 0        | 0 | 12   | 0.2      | 0.155664 | 1.646922 | Unclassified | chr9:54610614-54620916    | 8.303   |
| Vil1     | 0 | 0        | 0 | 134  | 2.233333 | 0.082846 | 0.653219 | Unclassified | chr1:74453957-74482134    | 26.178  |
| VeZF1    | 0 | 0        | 0 | 453  | 7.55     | 4.18116  | 13.26784 | Unclassified | chr11:87879842-87898231   | 16.39   |
| Bmp7     | 0 | 0        | 0 | 120  | 2        | 0.097785 | 1.131165 | Unclassified | chr2:172695188-172767794  | 70.607  |
| Lin7b    | 0 | 0        | 0 | 183  | 3.05     | 0.700343 | 18.20141 | Stalled      | chr7:52623260-52627934    | 2.675   |
| Lin7c    | 0 | 0        | 0 | 455  | 7.583333 | 6.41548  | 21.38013 | Unclassified | chr2:109729034-109741093  | 10.06   |
| Vegfb    | 0 | 0        | 0 | 269  | 4.483333 | 14.5701  | 3.964807 | Unclassified | chr19:7056961-7064093     | 5.133   |
| Vegfc    | 0 | 0        | 0 | 68   | 1.133333 | 0.817628 | 5.889476 | Unclassified | chr8:55160885-55271808    | 108.924 |
| Spon2    | 0 | 0        | 0 | 13   | 0.216667 | 0.063022 | 0.252819 | Unclassified | chr5:33556166-33562887    | 4.722   |
| Trrap    | 0 | 0        | 0 | 1619 | 26.98333 | 11.0857  | 10.45726 | Unclassified | chr5:145527660-145620642  | 90.983  |
| Ednrb    | 0 | 0        | 0 | 29   | 0.483333 | 0.52387  | 4.116375 | Unclassified | chr14:104213841-104245390 | 29.55   |
| Stk25    | 0 | 0        | 0 | 285  | 4.75     | 12.2867  | 14.59252 | Unclassified | chr1:95517327-95534304    | 14.978  |
| Ndst2    | 0 | 0        | 0 | 397  | 6.616667 | 4.86767  | 10.60013 | Unclassified | chr14:21542951-21555784   | 10.834  |
| Parl     | 0 | 0        | 0 | 444  | 7.4      | 17.1459  | 9.196865 | Unclassified | chr16:20279893-20304435   | 22.543  |
| Olfr741  | 0 | 0        | 0 | 6    | 0.1      | 0.010892 | 0.755202 | Unclassified | chr14:51090731-51106070   | 13.34   |
| Tmeff1   | 0 | 0        | 0 | 109  | 1.816667 | 0.372629 | 1.710348 | Unclassified | chr4:48596064-48676003    | 77.94   |
| Olfr1271 | 0 | 0        | 0 | 0    | 0        | 0.025447 | 0        | Unclassified | chr2:90105667-90108585    | 0.919   |
| Olfr914  | 0 | 0        | 0 | 1    | 0.016667 | 0        | 0        | Unclassified | chr9:38412051-38415002    | 0.952   |
| Olfr920  | 0 | 0        | 0 | 5    | 0.083333 | 0.039234 | 3.016957 | Unclassified | chr9:38558380-38564448    | 4.069   |
| Olfr916  | 0 | 0        | 0 | 0    | 0        | 0        | 0        | Unclassified | chr9:38465042-38467975    | 0.934   |
| Olfr1238 | 0 | 0        | 0 | 0    | 0        | 0        | 0        | Unclassified | chr2:89246286-89249234    | 0.949   |
| Krt39    | 0 | 0        | 0 | 7    | 0.116667 | 0        | 0.484359 | Unclassified | chr11:99375937-99384572   | 6.636   |
| Olfr1245 | 0 | 0        | 0 | 2    | 0.033333 | 0        | 1        | Unclassified | chr2:89414868-89417930    | 1.063   |
| Olfr1230 | 0 | 0        | 0 | 1    | 0.016667 | 0        | 1        | Unclassified | chr2:89136507-89139425    | 0.919   |
| BC005537 | 0 | 0        | 0 | 863  | 14.38333 | 26.3624  | 17.88085 | Unclassified | chr13:24891525-24904768   | 11.244  |
| Lrrc47   | 0 | 0        | 0 | 620  | 10.33333 | 34.8796  | 5.399314 | Unclassified | chr4:153383911-153395621  | 9.711   |
| Hdac9    | 0 | 126.7321 | 0 | 373  | 6.216667 | 1.24321  | 4.623326 | Unclassified | chr12:35056367-35215754   | 157.388 |
| Edn2     | 0 | 0        | 0 | 14   | 0.233333 | 0.030908 | 1.771416 | Unclassified | chr4:119832028-119839965  | 5.938   |
| Fam120c  | 0 | 0        | 0 | 544  | 9.066667 | 1.43826  | 80.87749 | Stalled      | chrX:147776765-147908677  | 129.913 |
| Tmem37   | 0 | 0        | 0 | 14   | 0.233333 | 0.113419 | 1.876085 | Unclassified | chr1:121963953-121972357  | 6.405   |
| Tppp     | 0 | 0        | 0 | 99   | 1.65     | 0.042813 | 2.048008 | Unclassified | chr13:74144866-74173200   | 26.335  |
| Gpr22    | 0 | 0        | 0 | 26   | 0.433333 | 0        | 1.155916 | Unclassified | chr12:32391731-32400744   | 7.014   |
| Dusp21   | 0 | 0        | 0 | 0    | 0        | 0        | 0        | Unclassified | chrX:17720995-17723818    | 0.824   |
| Bcl7a    | 0 | 0        | 0 | 781  | 13.01667 | 10.1244  | 8.317677 | Unclassified | chr5:123792456-123824092  | 29.637  |
| Arid2    | 0 | 0        | 0 | 1622 | 27.03333 | 3.92294  | 12.13779 | Unclassified | chr15:96115952-96235894   | 117.943 |
| Tssk5    | 0 | 0        | 0 | 195  | 3.25     | 0.01693  | 0.075822 | Unclassified | chr15:76202387-76207368   | 2.982   |
| Hyal4    | 0 | 0        | 0 | 15   | 0.25     | 0.049105 | 0.56888  | Unclassified | chr6:24696366-24716519    | 18.154  |
| Kremen2  | 0 | 0        | 0 | 22   | 0.366667 | 0.273507 | 1.029946 | Unclassified | chr17:23878165-23884796   | 4.632   |
| Ypel5    | 0 | 0        | 0 | 263  | 4.383333 | 2.85378  | 14.1961  | Stalled      | chr17:73184043-73200535   | 14.493  |
| Casc3    | 0 | 0        | 0 | 750  | 12.5     | 16.2564  | 19.73962 | Unclassified | chr11:98669121-98695121   | 24.001  |
| Olfr1367 | 0 | 0        | 0 | 2    | 0.033333 | 0        | 0        | Unclassified | chr13:21436798-21439749   | 0.952   |
| Olfr1368 | 0 | 0        | 0 | 0    | 0        | 0.081374 | 0        | Unclassified | chr13:21233979-21236924   | 0.946   |
| Olfr1168 | 0 | 0        | 0 | 1    | 0.016667 | 0        | 1        | Unclassified | chr2:88023035-88025972    | 0.938   |
| Pde6b    | 0 | 0        | 0 | 182  | 3.033333 | 0.031859 | 0        | Unclassified | chr5:108815391-108860761  | 43.371  |
| St3gal3  | 0 | 0        | 0 | 1044 | 17.4     | 5.17525  | 24.42007 | Stalled      | chr4:117604757-117809495  | 202.739 |
| Olfr1186 | 0 | 0        | 0 | 1    | 0.016667 | 0        | 0        | Unclassified | chr2:88363657-88366745    | 1.089   |
| Olfr813  | 0 | 0        | 0 | 1    | 0.016667 | 0.027441 | 1        | Unclassified | chr10:129291575-129294508 | 0.934   |
| Uts2     | 0 | 0        | 0 | 8    | 0.133333 | 0.214799 | 0.426211 | Unclassified | chr4:150369205-150375918  | 4.714   |
| Olfr1466 | 0 | 0        | 0 | 0    | 0        | 0        | 0        | Unclassified | chr19:13414249-13417182   | 0.934   |
| Olfr1370 | 0 | 0        | 0 | 2    | 0.033333 | 0        | 2        | Unclassified | chr13:21164217-21167168   | 0.952   |
| Olfr313  | 0 | 0        | 0 | 2    | 0.033333 | 0.022323 | 1        | Unclassified | chr11:58628511-58631438   | 0.928   |
| Med1     | 0 | 0        | 0 | 1226 | 20.43333 | 12.0458  | 14.31778 | Unclassified | chr11:98013468-98056607   | 41.14   |
| Pparg    | 0 | 0        | 0 | 109  | 1.816667 | 0.075918 | 1.649124 | Unclassified | chr6:115309238-115440419  | 129.182 |
| Olfr1462 | 0 | 0        | 0 | 2    | 0.033333 | 0        | 0        | Unclassified | chr19:13263158-13266082   | 0.925   |
| Rpap3    | 0 | 0        | 0 | 385  | 6.416667 | 9.97823  | 22.63994 | Unclassified | chr15:97505535-97538253   | 30.719  |

|               |   |          |   |      |          |          |          |              |                           |         |
|---------------|---|----------|---|------|----------|----------|----------|--------------|---------------------------|---------|
| Ppap2a        | 0 | 0        | 0 | 1006 | 16.76667 | 17.8511  | 21.20313 | Unclassified | chr13:113588999-113657888 | 66.89   |
| Ppara         | 0 | 0        | 0 | 107  | 1.783333 | 0.183788 | 3.804226 | Unclassified | chr15:85563993-85637281   | 71.289  |
| Bod1l         | 0 | 0        | 0 | 685  | 11.41667 | 4.57566  | 17.84367 | Unclassified | chr5:42178777-42237554    | 56.778  |
| Gm7247        | 0 | 0        | 0 | 100  | 1.666667 | 0.011096 | 0        | Unclassified | chr14:51979430-52189657   | 208.228 |
| Bsph1         | 0 | 0        | 0 | 11   | 0.183333 | 0.046775 | 0.683644 | Unclassified | chr7:14034189-14058798    | 22.61   |
| Batf2         | 0 | 0        | 0 | 15   | 0.25     | 0.065437 | 1.752669 | Unclassified | chr19:6162457-6172475     | 8.019   |
| Mettl7b       | 0 | 0        | 0 | 5    | 0.083333 | 0.031336 | 0.363463 | Unclassified | chr10:128395332-128400044 | 2.713   |
| 2410017P07Rik | 0 | 0        | 0 | 472  | 7.866667 | 2.52713  | 28.31858 | Stalled      | chr10:41438651-41531436   | 90.786  |
| Rem1          | 0 | 0        | 0 | 18   | 0.3      | 0.127923 | 0.647735 | Unclassified | chr2:152450743-152460927  | 8.185   |
| Zfp879        | 0 | 0        | 0 | 30   | 0.5      | 0.345829 | 5.674541 | Unclassified | chr11:50645536-50657054   | 9.519   |
| Gm4894        | 0 | 0        | 0 | 27   | 0.45     | 0.033521 | 0        | Unclassified | chr9:49056635-49088699    | 30.065  |
| Larp4         | 0 | 0        | 0 | 925  | 15.41667 | 4.72043  | 39.21536 | Unclassified | chr15:99801210-99846789   | 43.58   |
| Gm15217       | 0 | 0        | 0 | 3    | 0.05     | 0.052598 | 1.517025 | Unclassified | chr14:46997141-47003281   | 4.141   |
| Mrps33        | 0 | 0        | 0 | 259  | 4.316667 | 12.3484  | 23.97323 | Stalled      | chr6:39751806-39762935    | 9.13    |
| Adam21        | 0 | 0        | 0 | 34   | 0.566667 | 0.026416 | 2.84323  | Unclassified | chr12:82659570-82671461   | 9.892   |
| Fgf7          | 0 | 0        | 0 | 49   | 0.816667 | 0.043169 | 0        | Unclassified | chr2:125858393-125916921  | 56.529  |
| Clec4n        | 0 | 0        | 0 | 5    | 0.083333 | 0.343918 | 0        | Unclassified | chr6:123177891-123197039  | 17.149  |
| 38974         | 0 | 0        | 0 | 719  | 11.98333 | 44.9786  | 23.27296 | Unclassified | chr3:144231390-144260640  | 27.251  |
| Poll          | 0 | 0        | 0 | 191  | 3.183333 | 6.52434  | 6.297374 | Unclassified | chr19:45626765-45637033   | 8.269   |
| Adamts18      | 0 | 0        | 0 | 117  | 1.95     | 0.031678 | 1.135394 | Unclassified | chr8:116222036-116374739  | 150.704 |
| Fgf8          | 0 | 0        | 0 | 11   | 0.183333 | 0.34496  | 2.01725  | Unclassified | chr19:45811288-45819374   | 6.087   |
| Zfp488        | 0 | 0        | 0 | 12   | 0.2      | 0.026831 | 0        | Unclassified | chr14:34780257-34793950   | 11.694  |
| Olfr873       | 0 | 0        | 0 | 1    | 0.016667 | 0        | 1        | Unclassified | chr9:20102654-20105614    | 0.961   |
| Chrng         | 0 | 0        | 0 | 118  | 1.966667 | 0.153449 | 0        | Unclassified | chr1:89100385-89108410    | 6.026   |
| Gm5039        | 0 | 0        | 0 | 0    | 0        | 0.083307 | 0        | Unclassified | chr12:89558565-89562206   | 1.642   |
| Pacsin1       | 0 | 0        | 0 | 466  | 7.766667 | 8.2665   | 7.275077 | Unclassified | chr17:27790626-27848051   | 55.426  |
| Nlrp5         | 0 | 0        | 0 | 22   | 0.366667 | 0.007393 | 0.723779 | Unclassified | chr7:24168915-24226940    | 56.026  |
| Grhl1         | 0 | 0        | 0 | 260  | 4.333333 | 0.454718 | 0.499482 | Unclassified | chr12:25263583-25302254   | 36.672  |
| Abpd          | 0 | 0        | 0 | 0    | 0        | 0        | 0        | Unclassified | chr7:34149361-34153338    | 1.978   |
| Odz1          | 0 | 0        | 0 | 175  | 2.916667 | 0.02452  | 0.809918 | Unclassified | chrX:39885569-40629963    | 742.395 |
| Odz3          | 0 | 0        | 0 | 326  | 5.433333 | 0.032832 | 1.162156 | Unclassified | chr8:49311018-49762044    | 449.027 |
| Odz2          | 0 | 0        | 0 | 654  | 10.9     | 0.055277 | 0        | Unclassified | chr11:35820170-36759745   | 937.576 |
| Osr1          | 0 | 0        | 0 | 9    | 0.15     | 0.173471 | 0.430969 | Unclassified | chr12:9579247-9588305     | 7.059   |
| Odz4          | 0 | 0        | 0 | 730  | 12.16667 | 0.062677 | 0.980251 | Unclassified | chr7:103357146-104057064  | 697.919 |
| Tnfrsf12a     | 0 | 0        | 0 | 157  | 2.616667 | 0        | 6.118454 | Unclassified | chr17:23812413-23816416   | 2.004   |
| Txndc2        | 0 | 0        | 0 | 13   | 0.216667 | 0.014842 | 0.316298 | Unclassified | chr17:65986844-65993544   | 4.701   |
| Sec11c        | 0 | 0        | 0 | 1225 | 20.41667 | 93.4949  | 4.546518 | Unclassified | chr18:65958231-65977311   | 17.081  |
| Wfdc16        | 0 | 0        | 0 | 6    | 0.1      | 0.034299 | 0.436302 | Unclassified | chr2:164460207-164466302  | 4.096   |
| Pdk4          | 0 | 0        | 0 | 11   | 0.183333 | 0.04454  | 0        | Unclassified | chr6:5433350-5448278      | 12.929  |
| Lima1         | 0 | 0        | 0 | 132  | 2.2      | 0.374218 | 5.914356 | Unclassified | chr15:99608898-99707887   | 96.99   |
| Zfp354b       | 0 | 0        | 0 | 29   | 0.483333 | 0.555438 | 3.710956 | Unclassified | chr11:50735287-50747137   | 9.851   |
| Golga5        | 0 | 0        | 0 | 367  | 6.116667 | 7.70669  | 6.397898 | Unclassified | chr12:103706119-103736117 | 27.999  |
| Tmem97        | 0 | 0        | 0 | 589  | 9.816667 | 30.368   | 10.50763 | Unclassified | chr11:78355318-78366237   | 8.92    |
| 1810019J16Rik | 0 | 0        | 0 | 208  | 3.466667 | 0.149659 | 0.202573 | Unclassified | chr4:133072877-133086705  | 11.829  |
| Ebna1bp2      | 0 | 0        | 0 | 353  | 5.883333 | 22.5012  | 5.887425 | Unclassified | chr4:118291420-118300379  | 6.96    |
| Psm11         | 0 | 0        | 0 | 775  | 12.91667 | 20.9653  | 14.32886 | Unclassified | chr11:80240116-80285635   | 43.52   |
| Triap1        | 0 | 0        | 0 | 304  | 5.066667 | 15.735   | 3.327499 | Unclassified | chr5:115789255-115793561  | 2.307   |
| Gzmd          | 0 | 0        | 0 | 2    | 0.033333 | 0.094485 | 0        | Unclassified | chr14:56748404-56753430   | 3.027   |
| 9030612E09Rik | 0 | 0        | 0 | 7    | 0.116667 | 1.23406  | 0.902098 | Unclassified | chr10:42892509-42896368   | 1.86    |
| Olfr1507      | 0 | 0        | 0 | 1    | 0.016667 | 0        | 0        | Unclassified | chr14:53109609-53112721   | 1.113   |
| Lin28         | 0 | 0        | 0 | 85   | 1.416667 | 0.441787 | 0.475079 | Unclassified | chr4:133559244-133576731  | 15.488  |
| Olfr644       | 0 | 0        | 0 | 1    | 0.016667 | 0        | 0        | Unclassified | chr7:111216598-111219543  | 0.946   |
| Olfr638       | 0 | 0        | 0 | 2    | 0.033333 | 0.015996 | 0        | Unclassified | chr7:111149772-111152738  | 0.967   |
| Tph1          | 0 | 0        | 0 | 24   | 0.4      | 0.13195  | 0.525944 | Unclassified | chr7:53902500-53929907    | 25.408  |
| Olfr623       | 0 | 0        | 0 | 0    | 0        | 0.059611 | 0        | Unclassified | chr7:110808757-110811832  | 1.076   |
| Bhlhe23       | 0 | 0        | 0 | 7    | 0.116667 | 0.279832 | 1.809524 | Unclassified | chr2:180509086-180513605  | 2.52    |
| Igf2bp3       | 0 | 0        | 0 | 861  | 14.35    | 4.51329  | 11.5343  | Unclassified | chr6:49035217-49166953    | 129.737 |
| Olfr632       | 0 | 0        | 0 | 3    | 0.05     | 0        | 1        | Unclassified | chr7:111083895-111086849  | 0.955   |
| Hrh4          | 0 | 0        | 0 | 15   | 0.25     | 0.016677 | 0        | Unclassified | chr18:13163498-13181391   | 15.894  |
| Igf2bp1       | 0 | 0        | 0 | 54   | 0.9      | 0.121122 | 0.957728 | Unclassified | chr11:95818477-95869258   | 48.782  |
| Man2a2        | 0 | 0        | 0 | 196  | 3.266667 | 10.6515  | 6.12441  | Unclassified | chr7:87505335-87518012    | 10.678  |
| Hsd3b5        | 0 | 0        | 0 | 6    | 0.1      | 0.046438 | 0        | Unclassified | chr3:98422558-98451457    | 26.9    |
| Hnmt          | 0 | 0        | 0 | 24   | 0.4      | 0.062557 | 0.684063 | Unclassified | chr2:23858431-23906899    | 46.469  |
| Pip4k2c       | 0 | 0        | 0 | 362  | 6.033333 | 10.97    | 21.81781 | Unclassified | chr10:126634123-126650678 | 14.556  |
| Kitl          | 0 | 0        | 0 | 61   | 1.016667 | 0.138771 | 2.378251 | Unclassified | chr10:99476457-99563045   | 84.589  |
| Pdcd5         | 0 | 0        | 0 | 266  | 4.433333 | 28.2493  | 8.0147   | Unclassified | chr7:36427003-36434501    | 5.499   |
| Mgmt          | 0 | 0        | 0 | 521  | 8.683333 | 4.77156  | 23.03174 | Stalled      | chr7:144084293-144319871  | 233.579 |
| Amotl2        | 0 | 0        | 0 | 25   | 0.416667 | 0.100916 | 2.240533 | Unclassified | chr9:102618133-102635747  | 15.615  |
| Mif           | 0 | 0        | 0 | 273  | 4.55     | 329.48   | 209      | Unclassified | chr10:75322097-75324995   | 0.899   |
| Cnn1          | 0 | 0        | 0 | 46   | 0.766667 | 0.03225  | 0        | Unclassified | chr9:21901696-21913665    | 9.97    |
| Cnih2         | 0 | 0        | 0 | 215  | 3.583333 | 0.63201  | 2.195245 | Elongating   | chr19:5092870-5100418     | 5.549   |
| Mrgprb4       | 0 | 0        | 0 | 2    | 0.033333 | 0.05307  | 2        | Unclassified | chr7:55453582-55456548    | 0.967   |
| Smc4          | 0 | 0        | 0 | 1180 | 19.66667 | 21.2243  | 10.88062 | Unclassified | chr3:68806893-68838545    | 29.653  |
| Tln2          | 0 | 0        | 0 | 371  | 6.183333 | 0.053868 | 0.481413 | Unclassified | chr9:67064891-67409510    | 342.62  |
| Zfp445        | 0 | 0        | 0 | 493  | 8.216667 | 8.90109  | 6.320887 | Unclassified | chr9:122758027-122777124  | 17.098  |
| Gm14744       | 0 | 0        | 0 | 0    | 0        | 0        | 0        | Unclassified | chrX:75108096-75115372    | 5.277   |
| Brd4          | 0 | 0        | 0 | 2016 | 33.6     | 17.8893  | 9.385723 | Unclassified | chr17:32333220-32423068   | 87.849  |
| BC049715      | 0 | 111.7637 | 0 | 464  | 7.733333 | 1.20505  | 8.775619 | Unclassified | chr6:136775363-136789075  | 11.713  |
| Gm16532       | 0 | 0        | 0 | 14   | 0.233333 | 0.046818 | 0        | Unclassified | chr7:6365885-6383797      | 15.913  |
| Sash1         | 0 | 0        | 0 | 345  | 5.75     | 0.522974 | 11.73459 | Stalled      | chr10:8442016-8607868     | 163.853 |
| Itga7         | 0 | 0        | 0 | 47   | 0.783333 | 0.36637  | 1.059362 | Unclassified | chr10:128368868-128395340 | 24.473  |
| Itga5         | 0 | 0        | 0 | 95   | 1.583333 | 0.522674 | 2.42221  | Unclassified | chr15:103174719-103199179 | 22.461  |
| Itga6         | 0 | 0        | 0 | 320  | 5.333333 | 1.33016  | 10.93191 | Stalled      | chr2:71623139-71694815    | 69.677  |
| Itga3         | 0 | 0        | 0 | 74   | 1.233333 | 0.908105 | 3.765855 | Unclassified | chr11:94905795-94940028   | 32.234  |
| S100a3        | 0 | 0        | 0 | 6    | 0.1      | 0.090002 | 0        | Unclassified | chr3:90402136-90406624    | 2.489   |
| Uchl4         | 0 | 0        | 0 | 21   | 0.35     | 13.3957  | 13       | Unclassified | chr9:64081007-64084169    | 1.163   |



|                      |   |   |   |      |          |          |          |              |                           |         |
|----------------------|---|---|---|------|----------|----------|----------|--------------|---------------------------|---------|
| <b>Slc28a2</b>       | 0 | 0 | 0 | 99   | 1.65     | 5.81406  | 1.619911 | Unclassified | chr2:122250212-122286866  | 34.655  |
| <b>Pnck</b>          | 0 | 0 | 0 | 11   | 0.183333 | 0.108472 | 1.244587 | Unclassified | chrX:70901332-70907167    | 3.836   |
| <b>Igsf9</b>         | 0 | 0 | 0 | 105  | 1.75     | 0.567562 | 3.843731 | Unclassified | chr1:174410343-174429008  | 16.666  |
| <b>Klk1b8</b>        | 0 | 0 | 0 | 2    | 0.033333 | 0.060383 | 0.765698 | Unclassified | chr7:51204041-51210308    | 4.268   |
| <b>Itgam</b>         | 0 | 0 | 0 | 92   | 1.533333 | 1.23721  | 0.37868  | Unclassified | chr7:135204153-135262005  | 55.853  |
| <b>Eli3</b>          | 0 | 0 | 0 | 231  | 3.85     | 3.09625  | 0.58989  | Unclassified | chr2:121264762-121270337  | 3.576   |
| <b>D330028D13Rik</b> | 0 | 0 | 0 | 180  | 3        | 1.80918  | 23.38742 | Stalled      | chr6:49315824-49339276    | 21.453  |
| <b>Olfr1243</b>      | 0 | 0 | 0 | 1    | 0.016667 | 0.034886 | 1        | Unclassified | chr2:89367647-89370565    | 0.919   |
| <b>Gm5766</b>        | 0 | 0 | 0 | 1    | 0.016667 | 0        | 0        | Unclassified | chr16:4227228-4231205     | 1.978   |
| <b>Kcnj10</b>        | 0 | 0 | 0 | 62   | 1.033333 | 0.151635 | 2.280268 | Unclassified | chr1:174269340-174304216  | 32.877  |
| <b>Trim21</b>        | 0 | 0 | 0 | 119  | 1.983333 | 4.87512  | 5.018843 | Unclassified | chr7:109706435-109715983  | 7.549   |
| <b>Ssb</b>           | 0 | 0 | 0 | 421  | 7.016667 | 42.3469  | 18.81263 | Unclassified | chr2:69697618-69709903    | 10.286  |
| <b>Nhp2l1</b>        | 0 | 0 | 0 | 515  | 8.583333 | 17.9405  | 7.945993 | Unclassified | chr15:81871774-81880028   | 6.255   |
| <b>Qrfp</b>          | 0 | 0 | 0 | 69   | 1.15     | 0.10296  | 0.886929 | Unclassified | chr2:31661687-31668038    | 4.352   |
| <b>Rfwd3</b>         | 0 | 0 | 0 | 807  | 13.45    | 11.1996  | 15.58671 | Unclassified | chr8:113794843-113826122  | 29.28   |
| <b>5930416I19Rik</b> | 0 | 0 | 0 | 333  | 5.55     | 14.2349  | 10.09328 | Unclassified | chr6:128307017-128314915  | 5.899   |
| <b>Aldh9a1</b>       | 0 | 0 | 0 | 470  | 7.833333 | 25.3032  | 21.48664 | Unclassified | chr1:169278121-169296661  | 18.541  |
| <b>1810030J14Rik</b> | 0 | 0 | 0 | 1    | 0.016667 | 0.088238 | 0        | Unclassified | chr1:176258649-176263004  | 2.566   |
| <b>Rbpjl</b>         | 0 | 0 | 0 | 46   | 0.766667 | 0.271355 | 0.422713 | Unclassified | chr2:164226693-164240948  | 12.256  |
| <b>Tacr2</b>         | 0 | 0 | 0 | 25   | 0.416667 | 0.039732 | 0        | Unclassified | chr10:61713185-61728738   | 13.554  |
| <b>Tacr2</b>         | 0 | 0 | 0 | 9    | 0.15     | 0        | 0        | Unclassified | chr10:127160447-127168824 | 6.378   |
| <b>Mpped1</b>        | 0 | 0 | 0 | 116  | 1.933333 | 0.019687 | 0        | Unclassified | chr15:83608452-83688904   | 78.453  |
| <b>Tac1</b>          | 0 | 0 | 0 | 5    | 0.083333 | 0.04958  | 0.633162 | Unclassified | chr6:7503070-7512973      | 7.904   |
| <b>Clec4a1</b>       | 0 | 0 | 0 | 7    | 0.116667 | 0.206982 | 0.662219 | Unclassified | chr6:122869875-122884637  | 12.763  |
| <b>Tacr3</b>         | 0 | 0 | 0 | 54   | 0.9      | 0.061436 | 0.667874 | Unclassified | chr3:134489970-134597536  | 105.567 |
| <b>Olfr1228</b>      | 0 | 0 | 0 | 0    | 0        | 0.039557 | 0        | Unclassified | chr2:89088877-89091849    | 0.973   |
| <b>Wwcl</b>          | 0 | 0 | 0 | 179  | 2.983333 | 0.065617 | 1.782825 | Unclassified | chr11:35652679-35795591   | 140.913 |
| <b>Fancd2</b>        | 0 | 0 | 0 | 690  | 11.5     | 3.50315  | 20.79552 | Unclassified | chr6:113479675-113546279  | 64.605  |
| <b>Ankrd33</b>       | 0 | 0 | 0 | 5    | 0.083333 | 0.063253 | 0        | Unclassified | chr15:100944185-100950455 | 4.271   |
| <b>Ccdc72</b>        | 0 | 0 | 0 | 344  | 5.733333 | 58.5246  | 15.43312 | Unclassified | chr9:108980501-108986895  | 4.395   |
| <b>En1</b>           | 0 | 0 | 0 | 12   | 0.2      | 0.472737 | 0.31063  | Unclassified | chr1:122497063-122504568  | 5.506   |
| <b>Rbmx12</b>        | 0 | 0 | 0 | 4    | 0.066667 | 0.086923 | 3        | Unclassified | chr7:114350958-114354430  | 1.473   |
| <b>Fam123c</b>       | 0 | 0 | 0 | 19   | 0.316667 | 0.032379 | 2.411886 | Unclassified | chr1:34634537-34647787    | 11.251  |
| <b>B3galt2</b>       | 0 | 0 | 0 | 51   | 0.85     | 0        | 2.398138 | Unclassified | chr1:145485826-145497067  | 9.242   |
| <b>B3galt1</b>       | 0 | 0 | 0 | 45   | 0.75     | 0.087645 | 1.919435 | Unclassified | chr3:69378107-69404783    | 24.677  |
| <b>Olfr1239</b>      | 0 | 0 | 0 | 1    | 0.016667 | 0        | 0        | Unclassified | chr2:89257650-89260568    | 0.919   |
| <b>2310067B10Rik</b> | 0 | 0 | 0 | 338  | 5.633333 | 7.99759  | 14.83134 | Unclassified | chr11:115624746-115660347 | 33.602  |
| <b>Adamts16</b>      | 0 | 0 | 0 | 102  | 1.7      | 0.020613 | 2.142215 | Unclassified | chr13:70866685-70982688   | 114.004 |
| <b>Ifitm2</b>        | 0 | 0 | 0 | 42   | 0.7      | 11.0701  | 1.517891 | Unclassified | chr7:148140737-148143860  | 1.124   |
| <b>Tom1l1</b>        | 0 | 0 | 0 | 156  | 2.6      | 0.313604 | 0.861704 | Unclassified | chr11:90507004-90550915   | 41.912  |
| <b>Abcd2</b>         | 0 | 0 | 0 | 22   | 0.366667 | 0.173378 | 0.692014 | Unclassified | chr15:90976301-91024238   | 45.938  |
| <b>Lass5</b>         | 0 | 0 | 0 | 709  | 11.81667 | 15.6841  | 17.77544 | Unclassified | chr15:99566022-99604946   | 36.925  |
| <b>Adh4</b>          | 0 | 0 | 0 | 10   | 0.166667 | 0.048843 | 0        | Unclassified | chr3:138076460-138093856  | 15.397  |
| <b>B3galt1</b>       | 0 | 0 | 0 | 5    | 0.083333 | 0.046352 | 0.498621 | Unclassified | chr2:67953769-67960746    | 4.978   |
| <b>Gars</b>          | 0 | 0 | 0 | 1065 | 17.75    | 44.2025  | 16.98672 | Unclassified | chr6:54985994-55029498    | 41.505  |
| <b>4932441K18Rik</b> | 0 | 0 | 0 | 673  | 11.21667 | 1.84886  | 15.74271 | Unclassified | chrX:159216850-159269331  | 50.482  |
| <b>Slc35b3</b>       | 0 | 0 | 0 | 530  | 8.833333 | 3.36395  | 20.35014 | Unclassified | chr13:39024008-39054406   | 28.399  |
| <b>Gm71</b>          | 0 | 0 | 0 | 291  | 4.85     | 24.7785  | 12.41402 | Unclassified | chr12:70678614-70686015   | 5.402   |
| <b>Pri2c2</b>        | 0 | 0 | 0 | 0    | 0        | 0.066656 | 0        | Unclassified | chr13:13088390-13099597   | 9.208   |
| <b>Smtnl1</b>        | 0 | 0 | 0 | 40   | 0.666667 | 0.262003 | 0.240995 | Unclassified | chr2:84651332-84664809    | 11.478  |
| <b>Rhoc</b>          | 0 | 0 | 0 | 94   | 1.566667 | 0.715727 | 0.367051 | Unclassified | chr3:104589951-104597377  | 5.427   |
| <b>Cggbp1</b>        | 0 | 0 | 0 | 455  | 7.583333 | 9.17572  | 17.3015  | Unclassified | chr16:64849910-64859317   | 7.408   |
| <b>Krtap4-2</b>      | 0 | 0 | 0 | 0    | 0        | 0.013168 | 0        | Unclassified | chr11:99495427-99498398   | 0.972   |
| <b>D630039A03Rik</b> | 0 | 0 | 0 | 17   | 0.283333 | 0.141617 | 1.154569 | Unclassified | chr4:57921255-57931136    | 7.882   |
| <b>Arhgap5</b>       | 0 | 0 | 0 | 142  | 2.366667 | 0.917548 | 0.824393 | Unclassified | chr12:53615063-53668838   | 51.776  |
| <b>Spdya</b>         | 0 | 0 | 0 | 130  | 2.166667 | 0.358094 | 3.904251 | Unclassified | chr17:71899400-71938873   | 37.474  |
| <b>Olfr658</b>       | 0 | 0 | 0 | 15   | 0.25     | 0.873471 | 5.865412 | Unclassified | chr7:111791393-111797819  | 4.427   |
| <b>Pigw</b>          | 0 | 0 | 0 | 680  | 11.33333 | 13.2115  | 28.34112 | Unclassified | chr11:84689814-84695697   | 3.884   |
| <b>Cyp2j6</b>        | 0 | 0 | 0 | 11   | 0.183333 | 0.427805 | 0.785016 | Unclassified | chr4:96182828-96222342    | 37.515  |
| <b>Klkb1</b>         | 0 | 0 | 0 | 26   | 0.433333 | 0.036454 | 0        | Unclassified | chr8:46354806-46382189    | 25.384  |
| <b>Cyp46a1</b>       | 0 | 0 | 0 | 64   | 1.066667 | 0.332645 | 4.99771  | Unclassified | chr12:109570590-109600444 | 27.855  |
| <b>Cyp27b1</b>       | 0 | 0 | 0 | 128  | 2.133333 | 0.269949 | 7.468594 | Unclassified | chr10:126483301-126490061 | 4.761   |
| <b>Speer1-ps1</b>    | 0 | 0 | 0 | 0    | 0        | 0        | 0        | Unclassified | chr5:11338407-11346273    | 5.867   |
| <b>Clec9a</b>        | 0 | 0 | 0 | 13   | 0.216667 | 0.03326  | 0        | Unclassified | chr6:129356880-129372723  | 13.844  |
| <b>Gm156</b>         | 0 | 0 | 0 | 5    | 0.083333 | 0        | 0        | Unclassified | chr6:129716664-129727867  | 9.204   |
| <b>Clec12a</b>       | 0 | 0 | 0 | 28   | 0.466667 | 0.24692  | 5.707428 | Unclassified | chr6:129298303-129315321  | 15.019  |
| <b>Smarca1</b>       | 0 | 0 | 0 | 26   | 0.433333 | 0.148549 | 3.9824   | Unclassified | chrX:45162546-45247729    | 83.184  |
| <b>Asb8</b>          | 0 | 0 | 0 | 339  | 5.65     | 6.92985  | 17.35956 | Unclassified | chr15:97965070-97978133   | 11.064  |
| <b>Olfr659</b>       | 0 | 0 | 0 | 1    | 0.016667 | 0        | 1        | Unclassified | chr7:111817217-111820186  | 0.97    |
| <b>Aste1</b>         | 0 | 0 | 0 | 260  | 4.333333 | 3.90303  | 12.05977 | Unclassified | chr9:105295721-105308084  | 10.364  |
| <b>Olfr1254</b>      | 0 | 0 | 0 | 1    | 0.016667 | 0        | 1        | Unclassified | chr2:89628562-89631507    | 0.946   |
| <b>Abcb1a</b>        | 0 | 0 | 0 | 134  | 2.233333 | 1.49904  | 13.13514 | Stalled      | chr5:8658091-8748570      | 88.48   |
| <b>Fzd7</b>          | 0 | 0 | 0 | 48   | 0.8      | 1.22978  | 4.394041 | Unclassified | chr1:59536990-59543799    | 4.81    |
| <b>Eif4g1</b>        | 0 | 0 | 0 | 1380 | 23       | 85.0813  | 4.819487 | Unclassified | chr16:20670821-20692956   | 20.136  |
| <b>Naip1</b>         | 0 | 0 | 0 | 34   | 0.566667 | 0.11877  | 0.571962 | Unclassified | chr13:101177724-101224819 | 45.096  |
| <b>Avpr2</b>         | 0 | 0 | 0 | 150  | 2.5      | 0.719397 | 1.205805 | Elongating   | chrX:71135440-71139766    | 2.327   |
| <b>Olfr1261</b>      | 0 | 0 | 0 | 1    | 0.016667 | 0.013883 | 1        | Unclassified | chr2:89831551-89834472    | 0.922   |
| <b>Olfr33</b>        | 0 | 0 | 0 | 1    | 0.016667 | 0.020041 | 1        | Unclassified | chr7:109861968-109864925  | 0.958   |
| <b>Olfr31</b>        | 0 | 0 | 0 | 2    | 0.033333 | 0.067242 | 1        | Unclassified | chr14:15158626-15161579   | 0.954   |
| <b>Fzd1</b>          | 0 | 0 | 0 | 6    | 0.1      | 0.165397 | 1.884551 | Unclassified | chr5:4753838-4760216      | 4.379   |
| <b>Naip2</b>         | 0 | 0 | 0 | 86   | 1.433333 | 0.756347 | 5.303935 | Unclassified | chr13:100914017-100974047 | 58.031  |
| <b>Hint3</b>         | 0 | 0 | 0 | 319  | 5.316667 | 10.2549  | 71.18832 | Stalled      | chr10:30328012-30340172   | 10.161  |
| <b>Fzd4</b>          | 0 | 0 | 0 | 20   | 0.333333 | 0.71965  | 3.895752 | Unclassified | chr7:96550875-96558620    | 5.746   |
| <b>Cx3c1</b>         | 0 | 0 | 0 | 46   | 0.766667 | 0.379229 | 0.360912 | Unclassified | chr8:97294079-97306326    | 10.248  |
| <b>Cxcl5</b>         | 0 | 0 | 0 | 4    | 0.066667 | 0.046464 | 1.140893 | Unclassified | chr5:91186324-91190651    | 2.328   |
| <b>Cxcl12</b>        | 0 | 0 | 0 | 28   | 0.466667 | 0.33227  | 0.699571 | Unclassified | chr6:117116552-117131386  | 12.835  |

|                      |   |   |   |      |          |          |          |              |                           |          |
|----------------------|---|---|---|------|----------|----------|----------|--------------|---------------------------|----------|
| <b>Paqr4</b>         | 0 | 0 | 0 | 152  | 2.533333 | 2.33149  | 1.008832 | Elongating   | chr17:23873152-23879297   | 4.146    |
| <b>Olf1393</b>       | 0 | 0 | 0 | 2    | 0.033333 | 0.084907 | 1        | Unclassified | chr11:49091651-49094587   | 0.937    |
| <b>Sfrp2</b>         | 0 | 0 | 0 | 16   | 0.266667 | 0.365265 | 1.749156 | Unclassified | chr3:83568242-83578235    | 7.994    |
| <b>Mrp14</b>         | 0 | 0 | 0 | 443  | 7.383333 | 32.1015  | 10.5006  | Unclassified | chr9:20805180-20813281    | 6.102    |
| <b>Mfap1a</b>        | 0 | 0 | 0 | 239  | 3.983333 | 10.1118  | 53.86711 | Stalled      | chr2:121318416-121334392  | 13.977   |
| <b>Slmap</b>         | 0 | 0 | 0 | 739  | 12.31667 | 10.3616  | 6.742202 | Unclassified | chr14:27232660-27355226   | 120.567  |
| <b>Uqcrb</b>         | 0 | 0 | 0 | 185  | 3.083333 | 22.7431  | 12.0297  | Stalled      | chr13:67001556-67008286   | 4.731    |
| <b>Glipr112</b>      | 0 | 0 | 0 | 22   | 0.366667 | 0.08185  | 1.111028 | Unclassified | chr10:111518409-111545154 | 24.746   |
| <b>Btf3</b>          | 0 | 0 | 0 | 562  | 9.366667 | 89.4723  | 10.62032 | Unclassified | chr13:99079852-99088922   | 7.071    |
| <b>Gm14137</b>       | 0 | 0 | 0 | 91   | 1.516667 | 1.0759   | 1.689389 | Elongating   | chr2:118998244-119003311  | 3.068    |
| <b>Sh3rf3</b>        | 0 | 0 | 0 | 322  | 5.366667 | 0.081966 | 3.06883  | Unclassified | chr10:58274106-58601664   | 325.559  |
| <b>Phka1</b>         | 0 | 0 | 0 | 181  | 3.016667 | 1.48167  | 29.83978 | Stalled      | chrX:99709313-99841585    | 130.273  |
| <b>AW146020</b>      | 0 | 0 | 0 | 508  | 8.466667 | 3.59255  | 10.00728 | Unclassified | chr6:81871662-81909092    | 35.431   |
| <b>Mthfd2l</b>       | 0 | 0 | 0 | 155  | 2.583333 | 0.662384 | 25.04172 | Stalled      | chr5:91358221-91450395    | 90.175   |
| <b>Olf787</b>        | 0 | 0 | 0 | 1    | 0.016667 | 0.011229 | 1        | Unclassified | chr10:128897733-128900672 | 0.94     |
| <b>Olf804</b>        | 0 | 0 | 0 | 2    | 0.033333 | 0        | 2        | Unclassified | chr10:129139935-129142880 | 0.946    |
| <b>Sic28a1</b>       | 0 | 0 | 0 | 99   | 1.65     | 0.049428 | 0        | Unclassified | chr7:88257684-88315301    | 55.618   |
| <b>Sis</b>           | 0 | 0 | 0 | 25   | 0.416667 | 0.013062 | 0.763099 | Unclassified | chr3:72692481-72772788    | 78.308   |
| <b>4632411B12Rik</b> | 0 | 0 | 0 | 679  | 11.31667 | 9.20592  | 10.53642 | Unclassified | chr1:36392574-36428026    | 33.453   |
| <b>Actr1b</b>        | 0 | 0 | 0 | 462  | 7.7      | 16.7268  | 9.067891 | Unclassified | chr1:36756046-36768770    | 10.725   |
| <b>Fbxo41</b>        | 0 | 0 | 0 | 251  | 4.183333 | 0.121093 | 0.348281 | Unclassified | chr6:85419571-85454880    | 33.31    |
| <b>Srp72</b>         | 0 | 0 | 0 | 640  | 10.66667 | 26.0892  | 11.10678 | Unclassified | chr5:77401725-77428960    | 25.236   |
| <b>Nudt16l1</b>      | 0 | 0 | 0 | 369  | 6.15     | 28.4044  | 4.70844  | Unclassified | chr16:4937110-4941025     | 1.916    |
| <b>Cyp2j5</b>        | 0 | 0 | 0 | 21   | 0.35     | 0.035104 | 2.761826 | Unclassified | chr4:96294122-96332810    | 36.689   |
| <b>Cdh22</b>         | 0 | 0 | 0 | 203  | 3.383333 | 0.110794 | 1.920486 | Unclassified | chr2:164937006-165062237  | 123.232  |
| <b>C87499</b>        | 0 | 0 | 0 | 6    | 0.1      | 0        | 0        | Unclassified | chr4:88273223-88282090    | 6.668    |
| <b>Fndc4</b>         | 0 | 0 | 0 | 12   | 0.2      | 0.282298 | 1.21997  | Unclassified | chr5:31594618-31600250    | 3.633    |
| <b>Tceal3</b>        | 0 | 0 | 0 | 2    | 0.033333 | 0.070298 | 1        | Unclassified | chrX:133198913-133202916  | 2.004    |
| <b>Ehbp1</b>         | 0 | 0 | 0 | 278  | 4.633333 | 0.199383 | 0.509135 | Unclassified | chr11:21905830-22187841   | 280.012  |
| <b>Rprd1b</b>        | 0 | 0 | 0 | 906  | 15.1     | 10.315   | 21.42008 | Unclassified | chr2:157852529-157903056  | 48.528   |
| <b>Zfp182</b>        | 0 | 0 | 0 | 182  | 3.033333 | 1.24254  | 19.10183 | Stalled      | chrX:20603309-20641164    | 35.856   |
| <b>Spink4</b>        | 0 | 0 | 0 | 53   | 0.883333 | 0.130446 | 0.721369 | Unclassified | chr4:40865088-40878428    | 11.341   |
| <b>Csrnp2</b>        | 0 | 0 | 0 | 321  | 5.35     | 0.779665 | 21.30291 | Unclassified | chr15:100310000-100327670 | 15.671   |
| <b>Zfp750</b>        | 0 | 0 | 0 | 73   | 1.216667 | 0        | 0.999036 | Unclassified | chr11:121372290-121382656 | 8.367    |
| <b>Tns4</b>          | 0 | 0 | 0 | 40   | 0.666667 | 0.048451 | 0.367181 | Unclassified | chr11:98926992-98952620   | 23.629   |
| <b>C2cd2</b>         | 0 | 0 | 0 | 195  | 3.25     | 1.89075  | 23.05177 | Stalled      | chr16:98076816-98146243   | 67.428   |
| <b>Grin2d</b>        | 0 | 0 | 0 | 130  | 2.166667 | 0.67831  | 29.08029 | Stalled      | chr7:53087852-53124051    | 34.2     |
| <b>Fam64a</b>        | 0 | 0 | 0 | 227  | 3.783333 | 16.9795  | 6.170594 | Unclassified | chr11:71854003-71860872   | 4.87     |
| <b>Omd</b>           | 0 | 0 | 0 | 12   | 0.2      | 0        | 0.46989  | Unclassified | chr13:49676115-49687978   | 9.864    |
| <b>Grhpr</b>         | 0 | 0 | 0 | 350  | 5.833333 | 44.4311  | 4.285991 | Unclassified | chr4:44992282-45003568    | 9.287    |
| <b>Racgap1</b>       | 0 | 0 | 0 | 486  | 8.1      | 18.9322  | 8.746198 | Unclassified | chr15:99450926-99484052   | 31.127   |
| <b>Tmem139</b>       | 0 | 0 | 0 | 13   | 0.216667 | 0.446951 | 0.126082 | Unclassified | chr6:42209968-42214554    | 2.587    |
| <b>Cbr2</b>          | 0 | 0 | 0 | 12   | 0.2      | 0.570866 | 0.70572  | Unclassified | chr11:120590798-120595335 | 2.538    |
| <b>Cbl</b>           | 0 | 0 | 0 | 1387 | 23.11667 | 7.8479   | 17.13304 | Unclassified | chr9:43957344-44044129    | 84.786   |
| <b>Hmmr</b>          | 0 | 0 | 0 | 647  | 10.78333 | 8.20525  | 17.68054 | Unclassified | chr11:40514889-40548939   | 32.051   |
| <b>Hmga2</b>         | 0 | 0 | 0 | 130  | 2.166667 | 0.636102 | 1.921747 | Unclassified | chr10:119798330-119915991 | 115.662  |
| <b>Cbln2</b>         | 0 | 0 | 0 | 6    | 0.1      | 0.104651 | 0.458699 | Unclassified | chr18:86880439-86887675   | 5.237    |
| <b>Acs14</b>         | 0 | 0 | 0 | 589  | 9.816667 | 5.57896  | 30.73915 | Unclassified | chrX:138752535-138827078  | 72.544   |
| <b>Magi2</b>         | 0 | 0 | 0 | 740  | 12.33333 | 1.51077  | 1.038659 | Unclassified | chr5:19411335-20210609    | 797.275  |
| <b>Gabra5</b>        | 0 | 0 | 0 | 60   | 1        | 0.047929 | 3.914279 | Unclassified | chr7:64663038-64767379    | 102.342  |
| <b>Dnajc30</b>       | 0 | 0 | 0 | 259  | 4.316667 | 25.121   | 9.170151 | Unclassified | chr5:135538075-135541235  | 1.161    |
| <b>Sh3bgr</b>        | 0 | 0 | 0 | 47   | 0.783333 | 0.09702  | 0.768628 | Unclassified | chr16:96420076-96450540   | 28.465   |
| <b>Dmrt1</b>         | 0 | 0 | 0 | 106  | 1.766667 | 0.216357 | 0.484188 | Unclassified | chr19:25578195-25678818   | 98.624   |
| <b>Gjd2</b>          | 0 | 0 | 0 | 6    | 0.1      | 0.015348 | 1.502488 | Unclassified | chr2:113835336-113841355  | 4.02     |
| <b>Cyc1</b>          | 0 | 0 | 0 | 471  | 7.85     | 74.4086  | 2.785172 | Elongating   | chr15:76171952-76176364   | 2.413    |
| <b>Defb46</b>        | 0 | 0 | 0 | 3    | 0.05     | 0        | 1.102737 | Unclassified | chr8:19237915-19242143    | 2.229    |
| <b>Tmprss11f</b>     | 0 | 0 | 0 | 36   | 0.6      | 0.005993 | 0.758953 | Unclassified | chr5:86950250-87063449    | 111.2    |
| <b>Mosc1</b>         | 0 | 0 | 0 | 76   | 1.266667 | 0.053363 | 3.691488 | Unclassified | chr1:186610645-186637192  | 24.548   |
| <b>Col24a1</b>       | 0 | 0 | 0 | 171  | 2.85     | 0.034119 | 0        | Unclassified | chr3:144953435-145214969  | 259.535  |
| <b>Csm3</b>          | 0 | 0 | 0 | 437  | 7.283333 | 0.021625 | 0        | Unclassified | chr15:47412183-48625535   | 1211.353 |
| <b>Grin2b</b>        | 0 | 0 | 0 | 363  | 6.05     | 0.088753 | 1.105791 | Unclassified | chr6:135679822-136125529  | 443.708  |
| <b>Cyt11</b>         | 0 | 0 | 0 | 7    | 0.116667 | 0        | 0        | Unclassified | chr5:38124757-38131059    | 4.303    |
| <b>Ccbl2</b>         | 0 | 0 | 0 | 181  | 3.016667 | 3.42932  | 22.8722  | Stalled      | chr3:142362043-142407874  | 43.832   |
| <b>Gtf2b</b>         | 0 | 0 | 0 | 724  | 12.06667 | 16.5821  | 26.98382 | Unclassified | chr3:142426210-142446569  | 18.36    |
| <b>Zfp566</b>        | 0 | 0 | 0 | 176  | 2.933333 | 4.58961  | 17.71216 | Stalled      | chr7:30862355-30877529    | 13.175   |
| <b>Olf147</b>        | 0 | 0 | 0 | 0    | 0        | 0.032671 | 0        | Unclassified | chr9:38207295-38211414    | 2.12     |
| <b>Utp14a</b>        | 0 | 0 | 0 | 460  | 7.666667 | 11.4199  | 12.55391 | Unclassified | chrX:45608110-45635626    | 25.517   |
| <b>Shisa9</b>        | 0 | 0 | 0 | 269  | 4.483333 | 0.066173 | 1.565146 | Unclassified | chr16:11982205-12270995   | 286.791  |
| <b>Wdr31</b>         | 0 | 0 | 0 | 98   | 1.633333 | 1.11209  | 9.075063 | Unclassified | chr4:62114767-62133906    | 17.14    |
| <b>Rbx1</b>          | 0 | 0 | 0 | 871  | 14.51667 | 13.8926  | 9.3359   | Unclassified | chr15:81294745-81306799   | 10.055   |
| <b>Adrm1</b>         | 0 | 0 | 0 | 595  | 9.916667 | 36.4921  | 5.163474 | Unclassified | chr2:179904292-179910988  | 4.697    |
| <b>Tspan3</b>        | 0 | 0 | 0 | 238  | 3.966667 | 11.102   | 14.92578 | Stalled      | chr9:55983691-56010877    | 25.187   |
| <b>Vps29</b>         | 0 | 0 | 0 | 358  | 5.966667 | 22.8426  | 32.3738  | Stalled      | chr5:122802421-122813296  | 8.876    |
| <b>Clip1</b>         | 0 | 0 | 0 | 966  | 16.1     | 8.49857  | 16.50174 | Unclassified | chr5:124029078-124136300  | 105.223  |
| <b>Pdhx</b>          | 0 | 0 | 0 | 560  | 9.333333 | 7.89923  | 27.8685  | Unclassified | chr2:102861233-102915668  | 52.436   |
| <b>Chrna6</b>        | 0 | 0 | 0 | 11   | 0.183333 | 0.013231 | 0        | Unclassified | chr8:28513683-28526416    | 10.734   |
| <b>Mrap2</b>         | 0 | 0 | 0 | 62   | 1.033333 | 0.032014 | 1.175465 | Unclassified | chr9:87037139-87078149    | 39.011   |
| <b>Sepp1</b>         | 0 | 0 | 0 | 36   | 0.6      | 5.4723   | 3.781711 | Unclassified | chr15:3218766-3230508     | 9.743    |
| <b>Pi4ka</b>         | 0 | 0 | 0 | 996  | 16.6     | 9.81228  | 28.80568 | Unclassified | chr16:17280443-17408407   | 125.965  |
| <b>Acat3</b>         | 0 | 0 | 0 | 323  | 5.383333 | 12.4938  | 0.426965 | Unclassified | chr17:13116824-13135262   | 16.439   |
| <b>Klhl22</b>        | 0 | 0 | 0 | 171  | 2.85     | 2.81938  | 16.90039 | Stalled      | chr16:17757713-17793475   | 33.763   |
| <b>Dnahc5</b>        | 0 | 0 | 0 | 178  | 2.966667 | 0.036935 | 1.825353 | Unclassified | chr15:28131520-28401800   | 268.281  |
| <b>Ptcr1</b>         | 0 | 0 | 0 | 19   | 0.316667 | 0.070035 | 1.278788 | Unclassified | chr17:46892613-46902661   | 8.049    |
| <b>Grin1</b>         | 0 | 0 | 0 | 104  | 1.733333 | 0.904646 | 1.467711 | Unclassified | chr2:25147766-25176499    | 26.734   |
| <b>Pstpip2</b>       | 0 | 0 | 0 | 164  | 2.733333 | 1.34818  | 6.014247 | Unclassified | chr18:78031288-78121618   | 88.331   |
| <b>Rhox6</b>         | 0 | 0 | 0 | 0    | 0        | 0.022207 | 0        | Unclassified | chrX:35178231-35183034    | 2.804    |

|               |   |   |   |      |          |          |          |              |                           |         |
|---------------|---|---|---|------|----------|----------|----------|--------------|---------------------------|---------|
| Try10         | 0 | 0 | 0 | 0    | 0        | 0.064785 | 0        | Unclassified | chr6:41302103-41307943    | 3.841   |
| Tubb4         | 0 | 0 | 0 | 78   | 1.3      | 1.03315  | 1.309002 | Unclassified | chr17:57219488-57229205   | 7.718   |
| Tubb3         | 0 | 0 | 0 | 36   | 0.6      | 0.824226 | 3.102995 | Unclassified | chr8:125933463-125945910  | 10.448  |
| Ttll2         | 0 | 0 | 0 | 1    | 0.016667 | 0.051972 | 0        | Unclassified | chr17:7555252-7559045     | 1.794   |
| Wiz           | 0 | 0 | 0 | 1452 | 24.2     | 12.4661  | 3.010394 | Unclassified | chr17:32491000-32528384   | 35.385  |
| Cox6b2        | 0 | 0 | 0 | 58   | 0.966667 | 3.95419  | 1.677245 | Unclassified | chr7:4703395-4706696      | 1.302   |
| Tulp3         | 0 | 0 | 0 | 336  | 5.6      | 2.65979  | 29.87599 | Stalled      | chr6:128271178-128307869  | 34.692  |
| Zfp326        | 0 | 0 | 0 | 425  | 7.083333 | 7.48685  | 19.94907 | Unclassified | chr5:106303586-106344831  | 39.246  |
| Snpb          | 0 | 0 | 0 | 61   | 1.016667 | 0.054666 | 0.414053 | Unclassified | chr2:151416285-151460269  | 41.985  |
| Wisp2         | 0 | 0 | 0 | 21   | 0.35     | 0.014465 | 0        | Unclassified | chr2:163644569-163658880  | 12.312  |
| Pak1ip1       | 0 | 0 | 0 | 382  | 6.366667 | 20.5919  | 11.5054  | Unclassified | chr13:41094378-41108402   | 12.025  |
| Fbxo28        | 0 | 0 | 0 | 486  | 8.1      | 2.87423  | 14.90061 | Unclassified | chr1:184243232-184273737  | 28.506  |
| Fam71b        | 0 | 0 | 0 | 8    | 0.133333 | 0.068141 | 0.720819 | Unclassified | chr11:46216231-46221484   | 3.254   |
| Cd96          | 0 | 0 | 0 | 269  | 4.483333 | 1.63934  | 16.85853 | Stalled      | chr16:46035769-46122361   | 84.593  |
| Ctnnal1       | 0 | 0 | 0 | 510  | 8.5      | 6.21127  | 23.41337 | Unclassified | chr4:56823808-56880083    | 54.276  |
| Thy1          | 0 | 0 | 0 | 536  | 8.933333 | 79.1487  | 3.088735 | Unclassified | chr9:43849466-43856662    | 5.197   |
| 5730409E04Rik | 0 | 0 | 0 | 61   | 1.016667 | 0.944649 | 11.38658 | Stalled      | chr4:126285097-126291613  | 4.517   |
| Thpo          | 0 | 0 | 0 | 35   | 0.583333 | 0.213078 | 0.952101 | Unclassified | chr16:20724526-20736584   | 10.059  |
| 4930563D23Rik | 0 | 0 | 0 | 8    | 0.133333 | 0.043056 | 0.591549 | Unclassified | chr16:92319007-92323686   | 2.68    |
| Atf7ip2       | 0 | 0 | 0 | 26   | 0.433333 | 0.224517 | 3.553806 | Unclassified | chr16:10190998-10243144   | 50.147  |
| Amac1         | 0 | 0 | 0 | 15   | 0.25     | 0.21351  | 0.42897  | Unclassified | chr11:69573386-69577346   | 1.961   |
| Naa10         | 0 | 0 | 0 | 369  | 6.15     | 49.1472  | 11.27895 | Unclassified | chrX:71162213-71169252    | 5.04    |
| Arl6          | 0 | 0 | 0 | 139  | 2.316667 | 7.92168  | 67.06861 | Stalled      | chr16:59613146-59641165   | 26.02   |
| Klre1         | 0 | 0 | 0 | 5    | 0.083333 | 0.028075 | 0.620601 | Unclassified | chr6:129526303-129535845  | 7.543   |
| 38973         | 0 | 0 | 0 | 21   | 0.35     | 0.030353 | 0        | Unclassified | chr5:130189265-130216386  | 25.122  |
| Fkbp1         | 0 | 0 | 0 | 31   | 0.516667 | 3.40923  | 4.558463 | Unclassified | chr17:34779827-34783272   | 1.446   |
| Ati2          | 0 | 0 | 0 | 793  | 13.21667 | 8.65817  | 15.71692 | Unclassified | chr17:80247731-80297368   | 47.638  |
| Elac1         | 0 | 0 | 0 | 310  | 5.166667 | 1.85847  | 12.62012 | Unclassified | chr18:73894691-73916133   | 19.443  |
| 1110034B05Rik | 0 | 0 | 0 | 317  | 5.283333 | 3.55411  | 23.90773 | Unclassified | chr1:57445087-57465518    | 18.432  |
| Adam5         | 0 | 0 | 0 | 35   | 0.583333 | 0.032144 | 0        | Unclassified | chr8:25843456-25936841    | 91.386  |
| Wfdc5         | 0 | 0 | 0 | 17   | 0.283333 | 0.019917 | 0.854635 | Unclassified | chr2:164003096-164010477  | 5.382   |
| 1700011F03Rik | 0 | 0 | 0 | 8    | 0.133333 | 0        | 0        | Unclassified | chr6:70863082-70870916    | 5.835   |
| Bpil2         | 0 | 0 | 0 | 47   | 0.783333 | 0.060064 | 0        | Unclassified | chr10:85422435-85476605   | 52.171  |
| Olfr716       | 0 | 0 | 0 | 1    | 0.016667 | 0        | 1        | Unclassified | chr7:114288831-114291776  | 0.946   |
| Zfp644        | 0 | 0 | 0 | 1356 | 22.6     | 2.37575  | 22.13147 | Unclassified | chr5:107045759-107127849  | 80.091  |
| Ajap1         | 0 | 0 | 0 | 125  | 2.083333 | 0.029252 | 0        | Unclassified | chr4:152747329-152858939  | 109.611 |
| Acta1         | 0 | 0 | 0 | 26   | 0.433333 | 0        | 0.607817 | Unclassified | chr8:126415666-126420636  | 2.971   |
| Jmy           | 0 | 0 | 0 | 259  | 4.316667 | 4.62874  | 14.67479 | Stalled      | chr13:94204156-94271644   | 65.489  |
| Piwil1        | 0 | 0 | 0 | 17   | 0.283333 | 0.051993 | 0        | Unclassified | chr5:129240120-129261349  | 19.23   |
| Mgst1         | 0 | 0 | 0 | 34   | 0.566667 | 1.16883  | 4.088723 | Unclassified | chr6:138087057-138105273  | 16.217  |
| Zfp112        | 0 | 0 | 0 | 87   | 1.45     | 0.184504 | 1.749767 | Unclassified | chr7:24895338-24912971    | 15.634  |
| Adipoq        | 0 | 0 | 0 | 20   | 0.333333 | 0.14564  | 1.184157 | Unclassified | chr16:23144608-23158041   | 11.434  |
| Sec61a2       | 0 | 0 | 0 | 409  | 6.816667 | 2.61274  | 23.10987 | Unclassified | chr2:5792032-5818399      | 24.368  |
| Stk32c        | 0 | 0 | 0 | 144  | 2.4      | 0.404771 | 0.752569 | Unclassified | chr7:146289536-146376393  | 84.858  |
| Prtg          | 0 | 0 | 0 | 142  | 2.366667 | 0.163787 | 3.603942 | Unclassified | chr9:72653080-72765114    | 110.035 |
| Mocs2         | 0 | 0 | 0 | 106  | 1.766667 | 4.8032   | 18.2486  | Stalled      | chr13:115606444-115619628 | 11.185  |
| Me1           | 0 | 0 | 0 | 121  | 2.016667 | 0.079202 | 1.991082 | Unclassified | chr9:86474969-86591947    | 114.979 |
| Npnt          | 0 | 0 | 0 | 68   | 1.133333 | 0.139726 | 2.087744 | Unclassified | chr3:132545658-132615255  | 67.598  |
| Lman1l        | 0 | 0 | 0 | 62   | 1.033333 | 0.09592  | 4.804348 | Unclassified | chr9:57454839-57470581    | 13.743  |
| Bpnt1         | 0 | 0 | 0 | 181  | 3.016667 | 5.6493   | 23.26593 | Stalled      | chr1:187154037-187181648  | 25.612  |
| AA415398      | 0 | 0 | 0 | 220  | 3.666667 | 0.419638 | 8.580182 | Unclassified | chr4:119202922-119213374  | 8.453   |
| Sucnr1        | 0 | 0 | 0 | 4    | 0.066667 | 0.032632 | 0        | Unclassified | chr3:59883790-59891488    | 5.699   |
| Smad4         | 0 | 0 | 0 | 760  | 12.66667 | 6.74968  | 33.26213 | Unclassified | chr18:73798666-73865395   | 64.73   |
| Smad5         | 0 | 0 | 0 | 593  | 9.883333 | 2.96136  | 15.61466 | Unclassified | chr13:56802370-56843739   | 39.37   |
| Nek3          | 0 | 0 | 0 | 197  | 3.283333 | 1.09836  | 41.02158 | Stalled      | chr8:23238756-23278907    | 38.152  |
| C1ql1         | 0 | 0 | 0 | 42   | 0.7      | 0.33971  | 6.142716 | Unclassified | chr11:102800578-102809775 | 7.198   |
| Nhp2          | 0 | 0 | 0 | 464  | 7.733333 | 117.842  | 2.424923 | Elongating   | chr11:51431274-51437216   | 3.943   |
| Smad2         | 0 | 0 | 0 | 971  | 16.18333 | 13.6821  | 24.3321  | Unclassified | chr18:76399578-76465385   | 63.808  |
| 1810048J11Rik | 0 | 0 | 0 | 194  | 3.233333 | 2.35401  | 37.37073 | Stalled      | chr12:73635343-73681200   | 43.858  |
| Mboat1        | 0 | 0 | 0 | 108  | 1.8      | 0.431511 | 3.636633 | Unclassified | chr13:30226358-30338563   | 110.206 |
| Idi2          | 0 | 0 | 0 | 4    | 0.066667 | 0.037093 | 0        | Unclassified | chr13:8950108-8960181     | 8.074   |
| Mettl7a1      | 0 | 0 | 0 | 66   | 1.1      | 2.61959  | 21.40567 | Stalled      | chr15:100133247-100144779 | 9.533   |
| Dok6          | 0 | 0 | 0 | 154  | 2.566667 | 0.154414 | 0.754444 | Unclassified | chr18:89470526-89940528   | 468.003 |
| Adam2         | 0 | 0 | 0 | 46   | 0.766667 | 0.015072 | 1.057876 | Unclassified | chr14:66646165-66698570   | 50.406  |
| Tsc1          | 0 | 0 | 0 | 459  | 7.65     | 4.32026  | 20.50806 | Unclassified | chr2:28494762-28546687    | 49.926  |
| Zkscan4       | 0 | 0 | 0 | 5    | 0.083333 | 1.30003  | 0        | Unclassified | chr13:21568775-21577374   | 6.6     |
| Spdye4        | 0 | 0 | 0 | 9    | 0.15     | 0.01056  | 1.764415 | Unclassified | chr5:143977994-143989561  | 9.568   |
| Adam3         | 0 | 0 | 0 | 84   | 1.4      | 0.165697 | 10.0802  | Stalled      | chr8:25787705-25838297    | 48.593  |
| Dyrk4         | 0 | 0 | 0 | 75   | 1.25     | 0.586793 | 1.573707 | Unclassified | chr6:126826216-126859529  | 31.314  |
| AY074887      | 0 | 0 | 0 | 271  | 4.516667 | 10.47    | 264      | Unclassified | chr9:54798063-54800761    | 0.699   |
| Rnf113a2      | 0 | 0 | 0 | 157  | 2.616667 | 16.1655  | 14.61538 | Unclassified | chr12:85756149-85759528   | 1.38    |
| Oas1a         | 0 | 0 | 0 | 64   | 1.066667 | 9.71812  | 2.459718 | Unclassified | chr5:121346267-121359534  | 11.268  |
| Dnajc28       | 0 | 0 | 0 | 33   | 0.55     | 3.01898  | 11.65836 | Stalled      | chr16:91614501-91621244   | 4.744   |
| Rptn          | 0 | 0 | 0 | 8    | 0.133333 | 0.015456 | 0.404002 | Unclassified | chr3:93195620-93203364    | 5.745   |
| Zfp872        | 0 | 0 | 0 | 18   | 0.3      | 0.082267 | 6.49281  | Unclassified | chr9:21990609-22006567    | 13.959  |
| Tmem150a      | 0 | 0 | 0 | 212  | 3.533333 | 1.84419  | 1.22218  | Elongating   | chr6:72303476-72309756    | 4.281   |
| Mapk15        | 0 | 0 | 0 | 20   | 0.333333 | 0.192577 | 1.07067  | Unclassified | chr15:75822198-75829583   | 5.386   |
| Eif4e1b       | 0 | 0 | 0 | 10   | 0.166667 | 0.099976 | 0.301737 | Unclassified | chr13:54883363-54889819   | 4.457   |
| Gpr113        | 0 | 0 | 0 | 68   | 1.133333 | 0.119818 | 0.292213 | Unclassified | chr5:30519970-30534262    | 12.293  |
| Mkx           | 0 | 0 | 0 | 59   | 0.983333 | 0.080077 | 2.871719 | Unclassified | chr18:6934963-7006777     | 69.815  |
| Zfp628        | 0 | 0 | 0 | 520  | 8.666667 | 6.22534  | 4.339163 | Unclassified | chr7:4864818-4873605      | 6.788   |
| 1110007A13Rik | 0 | 0 | 0 | 998  | 16.63333 | 10.9871  | 11.2342  | Unclassified | chr7:135839972-135885943  | 43.972  |
| Olfr802       | 0 | 0 | 0 | 0    | 0        | 0.068212 | 0        | Unclassified | chr10:129118854-129121793 | 0.94    |
| Defb34        | 0 | 0 | 0 | 6    | 0.1      | 0.260494 | 1.889182 | Unclassified | chr8:19121751-19126540    | 2.79    |
| Mmadhc        | 0 | 0 | 0 | 399  | 6.65     | 20.2326  | 20.93625 | Unclassified | chr2:50135400-50154197    | 16.798  |
| Cdh26         | 0 | 0 | 0 | 43   | 0.716667 | 0.026599 | 0.576276 | Unclassified | chr2:178163311-178222071  | 56.761  |

|               |   |          |   |      |           |          |          |              |                           |          |
|---------------|---|----------|---|------|-----------|----------|----------|--------------|---------------------------|----------|
| Fytd1         | 0 | 0        | 0 | 377  | 6.283333  | 6.85762  | 29.55064 | Stalled      | chr16:32875869-32909049   | 31.181   |
| Qser1         | 0 | 0        | 0 | 482  | 8.033333  | 0.754876 | 26.48684 | Stalled      | chr2:104594953-104658853  | 61.901   |
| Vnn3          | 0 | 0        | 0 | 13   | 0.216667  | 0.092    | 0.591601 | Unclassified | chr10:23569267-23569649   | 18.383   |
| Olfr938       | 0 | 0        | 0 | 0    | 0         | 0        | 0        | Unclassified | chr9:38885380-38888328    | 0.949    |
| Paqr8         | 0 | 0        | 0 | 178  | 2.966667  | 0.614559 | 21.34896 | Stalled      | chr1:20878702-20928837    | 48.136   |
| Epha7         | 0 | 0        | 0 | 66   | 1.1       | 0.262373 | 1.417627 | Unclassified | chr4:28738294-28894649    | 154.356  |
| Nt5e          | 0 | 0        | 0 | 102  | 1.7       | 0.588533 | 3.608587 | Unclassified | chr9:88220477-88266927    | 44.451   |
| Art2b         | 0 | 0        | 0 | 5    | 0.083333  | 0        | 0.605624 | Unclassified | chr7:108727373-108731675  | 2.303    |
| Art1          | 0 | 0        | 0 | 16   | 0.266667  | 0.171849 | 0.375195 | Unclassified | chr7:109248256-109259662  | 9.407    |
| Grid2         | 0 | 0        | 0 | 541  | 9.016667  | 0.033906 | 2.175257 | Unclassified | chr6:63204850-64616273    | 1409.424 |
| Grik2         | 0 | 0        | 0 | 216  | 3.6       | 0.045533 | 1.529042 | Unclassified | chr10:48819268-49510560   | 689.293  |
| Art5          | 0 | 0        | 0 | 33   | 0.55      | 0.657807 | 4.998454 | Unclassified | chr7:109245392-109250743  | 3.352    |
| Grik5         | 0 | 0        | 0 | 220  | 3.666667  | 1.89321  | 2.900519 | Unclassified | chr7:25794869-25859388    | 62.52    |
| Arc           | 0 | 0        | 0 | 17   | 0.283333  | 0.464677 | 0.416592 | Unclassified | chrX:90529984-90543694    | 11.711   |
| Dydc2         | 0 | 0        | 0 | 8    | 0.133333  | 0        | 0.729385 | Unclassified | chr14:41862497-41884363   | 19.867   |
| Nudt4         | 0 | 156.6688 | 0 | 493  | 8.216667  | 10.5574  | 8.434695 | Unclassified | chr10:95009640-95028801   | 17.162   |
| Katnal2       | 0 | 0        | 0 | 89   | 1.483333  | 1.25614  | 12.45587 | Stalled      | chr18:77231938-77288035   | 54.098   |
| Pcbp2         | 0 | 0        | 0 | 1279 | 21.316667 | 85.1723  | 8.731883 | Unclassified | chr15:102299062-102330490 | 29.429   |
| Gm4907        | 0 | 0        | 0 | 3    | 0.05      | 1.36072  | 0        | Unclassified | chrX:23467888-23484676    | 14.789   |
| Lrrc36        | 0 | 0        | 0 | 46   | 0.766667  | 0.14206  | 0        | Unclassified | chr8:107949539-107987986  | 36.448   |
| Cst13         | 0 | 0        | 0 | 4    | 0.066667  | 0        | 0.756355 | Unclassified | chr2:148643834-148656146  | 10.313   |
| Wfdc10        | 0 | 0        | 0 | 4    | 0.066667  | 0        | 3        | Unclassified | chr2:164479545-164482868  | 1.324    |
| Gpr137        | 0 | 0        | 0 | 326  | 5.433333  | 6.3499   | 18.07362 | Stalled      | chr19:7012559-7017969     | 3.411    |
| Larp7         | 0 | 0        | 0 | 380  | 6.333333  | 14.447   | 45.10816 | Stalled      | chr3:127239631-127258267  | 16.637   |
| 8430408G22Rik | 0 | 0        | 0 | 35   | 0.583333  | 0        | 1.356471 | Unclassified | chr6:116598701-116602865  | 2.165    |
| BC117090      | 0 | 0        | 0 | 3    | 0.05      | 0.066156 | 1        | Unclassified | chr16:36321750-36336418   | 12.669   |
| Fdx1l         | 0 | 0        | 0 | 578  | 9.633333  | 26.0401  | 11.66838 | Unclassified | chr9:20871963-20879958    | 5.996    |
| Fam78b        | 0 | 0        | 0 | 123  | 2.05      | 0.159306 | 2.695084 | Unclassified | chr1:168929547-169021433  | 89.887   |
| Papola        | 0 | 0        | 0 | 1203 | 20.05     | 19.9783  | 17.66494 | Unclassified | chr12:107020911-107077153 | 54.243   |
| Serpnb2       | 0 | 0        | 0 | 6    | 0.1       | 0.20856  | 1.390569 | Unclassified | chr1:109410049-109422175  | 10.127   |
| 4931406C07Rik | 0 | 0        | 0 | 79   | 1.316667  | 1.47808  | 3.840552 | Unclassified | chr9:15087782-15108000    | 18.219   |
| BC002230      | 0 | 0        | 0 | 825  | 13.75     | 6.66672  | 6.241139 | Unclassified | chr12:101363661-101399863 | 34.203   |
| Pla2g4a       | 0 | 0        | 0 | 136  | 2.266667  | 0.79708  | 4.041196 | Unclassified | chr1:151676751-151810414  | 131.664  |
| Pla2g2d       | 0 | 0        | 0 | 11   | 0.183333  | 0.152845 | 1.559078 | Unclassified | chr4:138329649-138338058  | 6.41     |
| Frrmpd4       | 0 | 0        | 0 | 325  | 5.416667  | 0.013398 | 0.773256 | Unclassified | chrX:163909240-165017165  | 1105.926 |
| Serpine1      | 0 | 0        | 0 | 15   | 0.25      | 0.139953 | 0.410973 | Unclassified | chr5:137537375-137550142  | 10.768   |
| Timm8a1       | 0 | 0        | 0 | 196  | 3.266667  | 9.22914  | 11.51495 | Stalled      | chrX:131071796-131078168  | 4.373    |
| Epha8         | 0 | 0        | 0 | 67   | 1.116667  | 0.576428 | 0.885882 | Unclassified | chr4:136485333-136514731  | 27.399   |
| Eri1          | 0 | 0        | 0 | 764  | 12.73333  | 8.7057   | 16.04021 | Unclassified | chr8:36528318-36560587    | 30.27    |
| D10Erdt322e   | 0 | 0        | 0 | 263  | 4.383333  | 29.6237  | 15.24052 | Unclassified | chr10:94943439-94966561   | 21.123   |
| Ndufa10       | 0 | 0        | 0 | 888  | 14.8      | 42.0907  | 12.30763 | Unclassified | chr1:94336295-94372335    | 34.041   |
| Cmtm5         | 0 | 0        | 0 | 7    | 0.116667  | 0.158404 | 0.622827 | Unclassified | chr14:55553306-55558114   | 2.809    |
| Spdef         | 0 | 0        | 0 | 47   | 0.783333  | 0.056212 | 1.871896 | Unclassified | chr17:27851391-27867896   | 14.506   |
| 1110037F02Rik | 0 | 0        | 0 | 798  | 13.3      | 7.56655  | 16.92688 | Unclassified | chr4:11411104-11478290    | 65.187   |
| Reg3d         | 0 | 0        | 0 | 4    | 0.066667  | 0        | 0        | Unclassified | chr6:78325867-78330859    | 2.993    |
| Pcsk1n        | 0 | 0        | 0 | 5    | 0.083333  | 0.105292 | 0        | Unclassified | chrX:7494947-7501534      | 4.588    |
| Rnf17         | 0 | 0        | 0 | 85   | 1.416667  | 0.077192 | 4.260906 | Unclassified | chr14:57019533-57143868   | 122.336  |
| 4932438A13Rik | 0 | 0        | 0 | 826  | 13.76667  | 3.71937  | 37.43037 | Stalled      | chr3:36760027-36951955    | 189.929  |
| Timm9         | 0 | 0        | 0 | 534  | 8.9       | 11.6384  | 9.80041  | Unclassified | chr12:72224158-72239662   | 13.505   |
| Slc38a5       | 0 | 0        | 0 | 11   | 0.183333  | 0.207384 | 0        | Unclassified | chrX:7846517-7857302      | 8.786    |
| Zic2          | 0 | 0        | 0 | 19   | 0.316667  | 0.211662 | 0.792051 | Unclassified | chr14:122872605-122879550 | 4.946    |
| Gpx2          | 0 | 0        | 0 | 5    | 0.083333  | 0.053952 | 0        | Unclassified | chr12:77893321-77898541   | 3.221    |
| 1810020D17Rik | 0 | 0        | 0 | 306  | 5.1       | 5.64637  | 35.75235 | Stalled      | chr7:104698850-104729925  | 29.076   |
| 1810012P15Rik | 0 | 0        | 0 | 210  | 3.5       | 0.862299 | 14.60988 | Stalled      | chr11:78638096-78657401   | 17.306   |
| Ankra2        | 0 | 0        | 0 | 405  | 6.75      | 6.03425  | 47.86937 | Stalled      | chr13:99031196-99043868   | 10.673   |
| 1810013D10Rik | 0 | 0        | 0 | 393  | 6.55      | 11.4692  | 10.04598 | Unclassified | chr5:53656344-53669778    | 11.435   |
| 1110032A04Rik | 0 | 0        | 0 | 25   | 0.416667  | 0.043892 | 0        | Unclassified | chr3:69623462-69665818    | 40.357   |
| Gpx3          | 0 | 0        | 0 | 216  | 3.6       | 3.88711  | 0.311927 | Unclassified | chr11:54714354-54723889   | 7.536    |
| Hsd17b7       | 0 | 0        | 0 | 593  | 9.883333  | 6.30864  | 32.28966 | Unclassified | chr1:171879667-171901336  | 19.67    |
| Zymy2         | 0 | 0        | 0 | 423  | 7.05      | 2.98229  | 12.59816 | Stalled      | chr14:57504630-57579186   | 72.557   |
| Mccc1         | 0 | 0        | 0 | 254  | 4.233333  | 4.76546  | 20.78236 | Stalled      | chr3:35858230-35901600    | 41.371   |
| BC017647      | 0 | 0        | 0 | 841  | 14.01667  | 3.94204  | 22.76099 | Unclassified | chr11:77906174-77970841   | 62.668   |
| BC030499      | 0 | 0        | 0 | 77   | 1.283333  | 0.414292 | 1.324326 | Unclassified | chr11:78102342-78107247   | 2.906    |
| Proca1        | 0 | 0        | 0 | 193  | 3.216667  | 0.245653 | 0.056759 | Unclassified | chr11:78004893-78019265   | 12.373   |
| Rpl4          | 0 | 0        | 0 | 969  | 16.15     | 1260.11  | 4.28189  | Unclassified | chr9:64019193-64026369    | 5.177    |
| Ythdf1        | 0 | 0        | 0 | 750  | 12.5      | 14.9809  | 7.305473 | Unclassified | chr2:180639081-180657641  | 16.561   |
| Nomo1         | 0 | 0        | 0 | 1283 | 21.38333  | 22.1031  | 10.95777 | Unclassified | chr7:53287065-53339582    | 50.518   |
| Ikzf2         | 0 | 0        | 0 | 98   | 1.633333  | 0.080226 | 0        | Unclassified | chr1:69577783-69734534    | 154.752  |
| Dvwa          | 0 | 0        | 0 | 93   | 1.55      | 0.16197  | 0        | Unclassified | chr9:105892649-106001022  | 106.374  |
| BC048679      | 0 | 0        | 0 | 10   | 0.166667  | 0        | 0.601119 | Unclassified | chr7:88639160-88645167    | 4.008    |
| Asah1         | 0 | 0        | 0 | 574  | 9.566667  | 9.39937  | 36.30788 | Unclassified | chr8:42425996-42462051    | 34.056   |
| Capn8         | 0 | 0        | 0 | 95   | 1.583333  | 0.073241 | 0.843321 | Unclassified | chr1:184493137-184562483  | 67.347   |
| Car12         | 0 | 0        | 0 | 162  | 2.7       | 0.896779 | 12.33389 | Stalled      | chr9:66559492-66614651    | 53.16    |
| Nxf7          | 0 | 0        | 0 | 8    | 0.133333  | 0        | 0        | Unclassified | chrX:132114325-132130394  | 14.07    |
| Bex4          | 0 | 0        | 0 | 1    | 0.016667  | 0.273368 | 0        | Unclassified | chrX:132671583-132674974  | 1.392    |
| Card14        | 0 | 0        | 0 | 74   | 1.233333  | 0.031515 | 0.882493 | Unclassified | chr11:119174100-119206689 | 30.59    |
| Krt83         | 0 | 0        | 0 | 13   | 0.216667  | 0.004331 | 0        | Unclassified | chr15:101261920-101271235 | 7.316    |
| Panx2         | 0 | 0        | 0 | 28   | 0.466667  | 0.364356 | 0.920622 | Unclassified | chr15:88888155-88901337   | 11.183   |
| Scrt1         | 0 | 0        | 0 | 21   | 0.35      | 0.29404  | 0.644801 | Unclassified | chr15:76346632-76354559   | 5.928    |
| Rtn4ip1       | 0 | 0        | 0 | 665  | 11.08333  | 10.1886  | 20.77805 | Unclassified | chr10:43619612-43667668   | 46.057   |
| Ttc8          | 0 | 0        | 0 | 126  | 2.1       | 2.04157  | 11.96113 | Stalled      | chr12:100156783-100221448 | 62.666   |
| Slc17a7       | 0 | 0        | 0 | 36   | 0.6       | 0.662717 | 2.712889 | Unclassified | chr7:52417290-52431508    | 12.219   |
| Tsen54        | 0 | 0        | 0 | 252  | 4.2       | 15.1793  | 10.87489 | Unclassified | chr11:115674052-115684416 | 8.365    |
| Nup107        | 0 | 0        | 0 | 958  | 15.96667  | 13.0142  | 13.78017 | Unclassified | chr10:117187698-117231761 | 42.064   |
| Slc39a3       | 0 | 0        | 0 | 59   | 0.983333  | 2.56518  | 0.888708 | Unclassified | chr10:80491284-80498657   | 5.374    |
| Slc4a7        | 0 | 0        | 0 | 1378 | 22.96667  | 6.85557  | 18.62571 | Unclassified | chr14:15533538-15632457   | 96.92    |



|               |   |          |   |      |          |          |          |              |                           |         |
|---------------|---|----------|---|------|----------|----------|----------|--------------|---------------------------|---------|
| D930020E02Rik | 0 | 0        | 0 | 7    | 0.116667 | 0.05983  | 0        | Unclassified | chr14:69908456-69914356   | 3.901   |
| Rspo3         | 0 | 0        | 0 | 48   | 0.8      | 0.171313 | 1.9819   | Unclassified | chr10:29172914-29257673   | 82.76   |
| Olfr215       | 0 | 0        | 0 | 2    | 0.033333 | 0        | 2        | Unclassified | chr6:116532029-116534962  | 0.934   |
| Olfr98        | 0 | 0        | 0 | 3    | 0.05     | 0.295869 | 2        | Unclassified | chr17:37399677-37402607   | 0.931   |
| Olfr107       | 0 | 0        | 0 | 1    | 0.016667 | 0.067848 | 1        | Unclassified | chr17:37540421-37543453   | 1.033   |
| Slc25a21      | 0 | 0        | 0 | 265  | 4.416667 | 0.525485 | 0.64785  | Unclassified | chr12:57813620-58300459   | 484.84  |
| Olfr95        | 0 | 0        | 0 | 1    | 0.016667 | 0.191085 | 1        | Unclassified | chr17:37347857-37350796   | 0.94    |
| Olfr96        | 0 | 0        | 0 | 2    | 0.033333 | 0        | 0        | Unclassified | chr17:37360071-37363013   | 0.943   |
| Olfr99        | 0 | 0        | 0 | 33   | 0.55     | 1.34091  | 16       | Unclassified | chr17:37416445-37419363   | 0.919   |
| Lor           | 0 | 0        | 0 | 6    | 0.1      | 0.799252 | 0.318917 | Unclassified | chr3:91884192-91889064    | 2.873   |
| Dda1          | 0 | 0        | 0 | 561  | 9.35     | 19.3165  | 2.518095 | Elongating   | chr8:73991092-74000334    | 7.243   |
| Gle1          | 0 | 0        | 0 | 346  | 5.766667 | 15.5329  | 18.40708 | Unclassified | chr2:29788946-29814175    | 23.23   |
| Prim2         | 0 | 0        | 0 | 1354 | 22.56667 | 8.88515  | 33.94937 | Unclassified | chr1:33510655-33728603    | 215.949 |
| Prg2          | 0 | 0        | 0 | 16   | 0.266667 | 11.8664  | 3.168152 | Unclassified | chr2:84818617-84823789    | 3.173   |
| Prim1         | 0 | 0        | 0 | 228  | 3.8      | 18.2642  | 7.496774 | Unclassified | chr10:127450270-127467086 | 14.817  |
| Kif1b         | 0 | 0        | 0 | 269  | 4.483333 | 1.25475  | 24.93746 | Stalled      | chr4:148550429-148683807  | 131.379 |
| Prkab1        | 0 | 0        | 0 | 538  | 8.966667 | 10.4321  | 8.892842 | Unclassified | chr5:116463598-116476437  | 10.84   |
| Gpatch1       | 0 | 0        | 0 | 366  | 6.1      | 5.04666  | 13.81976 | Unclassified | chr7:36061562-36105459    | 41.898  |
| Kcng3         | 0 | 0        | 0 | 87   | 1.45     | 0.450528 | 4.263757 | Unclassified | chr17:83985296-84033235   | 45.94   |
| Nrsn1         | 0 | 0        | 0 | 26   | 0.433333 | 0.044973 | 0.40418  | Unclassified | chr13:25343907-25363865   | 17.959  |
| Vnn1          | 0 | 0        | 0 | 11   | 0.183333 | 0.031829 | 0        | Unclassified | chr10:23612493-23625149   | 10.657  |
| Vpreb1        | 0 | 0        | 0 | 4    | 0.066667 | 0.084087 | 2        | Unclassified | chr16:16868495-16871343   | 0.849   |
| Vpreb2        | 0 | 0        | 0 | 3    | 0.05     | 0        | 2        | Unclassified | chr16:17978657-17981173   | 0.517   |
| Accn4         | 0 | 0        | 0 | 95   | 1.583333 | 0.130581 | 0.846947 | Unclassified | chr1:75445084-75470915    | 23.832  |
| Scrt2         | 0 | 0        | 0 | 35   | 0.583333 | 0.245451 | 0.35612  | Unclassified | chr2:151905264-151921537  | 14.274  |
| Commd8        | 0 | 0        | 0 | 298  | 4.966667 | 4.31788  | 16.10739 | Unclassified | chr5:72548238-72561422    | 11.185  |
| Btc           | 0 | 0        | 0 | 17   | 0.283333 | 0.068782 | 1.4971   | Unclassified | chr5:91786286-91833939    | 45.654  |
| Golim4        | 0 | 0        | 0 | 445  | 7.416667 | 6.21849  | 50.29583 | Stalled      | chr3:75680305-75762753    | 80.449  |
| Rap1b         | 0 | 0        | 0 | 1265 | 21.08333 | 48.977   | 9.768797 | Unclassified | chr10:117251652-117285030 | 31.379  |
| Entpd3        | 0 | 0        | 0 | 32   | 0.533333 | 0.048378 | 0.504596 | Unclassified | chr9:120446935-120477435  | 28.501  |
| Ccdc109a      | 0 | 0        | 0 | 898  | 14.96667 | 2.5396   | 21.87338 | Unclassified | chr10:58911180-59081440   | 168.261 |
| Plekhm2       | 0 | 0        | 0 | 2171 | 36.18333 | 18.2126  | 3.014476 | Unclassified | chr4:141181648-141222030  | 38.383  |
| Hfe2          | 0 | 0        | 0 | 15   | 0.25     | 0.215614 | 1.260284 | Unclassified | chr3:96327107-9633139     | 4.033   |
| Pcgf3         | 0 | 0        | 0 | 528  | 8.8      | 2.58286  | 14.56865 | Unclassified | chr5:108888350-108932118  | 41.769  |
| Mid2          | 0 | 0        | 0 | 17   | 0.283333 | 0.021664 | 0.847166 | Unclassified | chrX:137210566-137302254  | 89.689  |
| Anxa2         | 0 | 0        | 0 | 88   | 1.466667 | 1.80932  | 1.278302 | Unclassified | chr9:69299489-69339592    | 38.104  |
| BC018242      | 0 | 0        | 0 | 31   | 0.516667 | 1.1644   | 0.526    | Unclassified | chr9:21740717-21753351    | 10.635  |
| Sfrs4         | 0 | 0        | 0 | 1356 | 22.6     | 52.61    | 11.54849 | Unclassified | chr4:131427553-131457640  | 28.088  |
| Kank2         | 0 | 0        | 0 | 74   | 1.233333 | 0.314195 | 3.317165 | Unclassified | chr9:21571216-21604990    | 31.775  |
| Flywch2       | 0 | 0        | 0 | 58   | 0.966667 | 1.75107  | 3.433471 | Unclassified | chr17:23913884-23925044   | 9.161   |
| Mnd1          | 0 | 0        | 0 | 392  | 6.533333 | 2.05813  | 35.04719 | Stalled      | chr3:83891855-83961708    | 67.854  |
| Btg3          | 0 | 0        | 0 | 436  | 7.266667 | 3.51191  | 13.8282  | Unclassified | chr16:78360104-78379030   | 16.927  |
| Gm5169        | 0 | 0        | 0 | 0    | 0        | 0        | 0        | Unclassified | chrX:24704608-24730581    | 23.974  |
| Gm5168        | 0 | 0        | 0 | 0    | 0        | 0        | 0        | Unclassified | chrX:25455339-25480167    | 22.829  |
| Olfr201       | 0 | 0        | 0 | 0    | 0        | 0.027651 | 0        | Unclassified | chr16:59268564-59271491   | 0.928   |
| Hoxa3         | 0 | 0        | 0 | 133  | 2.216667 | 0.096669 | 1.279895 | Unclassified | chr6:52119061-52165066    | 44.006  |
| Btnl6         | 0 | 0        | 0 | 12   | 0.2      | 0.072829 | 0.483323 | Unclassified | chr17:34644879-34656297   | 9.419   |
| Tshb          | 0 | 0        | 0 | 7    | 0.116667 | 0        | 0.463404 | Unclassified | chr3:102581320-102588637  | 5.318   |
| Tshr          | 0 | 0        | 0 | 95   | 1.583333 | 0.095667 | 4.338022 | Unclassified | chr12:92637432-92778949   | 139.518 |
| Arpc5         | 0 | 0        | 0 | 534  | 8.9      | 75.8386  | 7.507259 | Unclassified | chr1:154611671-154622708  | 9.038   |
| Mlit3         | 0 | 0        | 0 | 1670 | 27.83333 | 4.31119  | 15.11663 | Unclassified | chr4:87415828-87681311    | 263.484 |
| Aadacl3       | 0 | 0        | 0 | 5    | 0.083333 | 0        | 0.749729 | Unclassified | chr4:144043673-144055659  | 9.987   |
| Olfr556       | 0 | 0        | 0 | 1    | 0.016667 | 0.037585 | 1        | Unclassified | chr7:109816414-109819437  | 1.024   |
| Mex3c         | 0 | 0        | 0 | 740  | 12.33333 | 7.82324  | 23.31433 | Unclassified | chr18:73730358-73752232   | 19.875  |
| Reg3a         | 0 | 0        | 0 | 3    | 0.05     | 0        | 0.515973 | Unclassified | chr6:78328702-78333833    | 3.132   |
| Reg3g         | 0 | 0        | 0 | 2    | 0.033333 | 0        | 0        | Unclassified | chr6:78416261-78420868    | 2.608   |
| Reg2          | 0 | 0        | 0 | 1    | 0.016667 | 0        | 1        | Unclassified | chr6:78353148-78358091    | 2.944   |
| BC017158      | 0 | 0        | 0 | 201  | 3.35     | 4.94415  | 11.53983 | Stalled      | chr7:135414893-135443645  | 26.753  |
| 4933402N03Rik | 0 | 0        | 0 | 4    | 0.066667 | 0.044156 | 2.622071 | Unclassified | chr7:138281860-138291797  | 7.938   |
| Gpr26         | 0 | 0        | 0 | 25   | 0.416667 | 0.054947 | 0.441409 | Unclassified | chr7:139156142-139177316  | 19.175  |
| Gstp1         | 0 | 0        | 0 | 325  | 5.416667 | 73.451   | 7.791799 | Unclassified | chr19:4035410-4039912     | 2.503   |
| Actn1         | 0 | 0        | 0 | 316  | 5.266667 | 2.49197  | 5.649868 | Unclassified | chr12:81268529-81363358   | 92.83   |
| Gsto1         | 0 | 0        | 0 | 172  | 2.866667 | 8.85178  | 13.42506 | Stalled      | chr19:47927478-47939278   | 9.801   |
| Olfr978       | 0 | 0        | 0 | 1    | 0.016667 | 0.020523 | 1        | Unclassified | chr9:39799396-39802332    | 0.937   |
| Olfr550       | 0 | 0        | 0 | 2    | 0.033333 | 0        | 1        | Unclassified | chr7:109724982-109728019  | 1.038   |
| Olfr555       | 0 | 0        | 0 | 1    | 0.016667 | 0        | 0        | Unclassified | chr7:109805336-109808284  | 0.949   |
| Mycn          | 0 | 0        | 0 | 27   | 0.45     | 0.508506 | 1.506828 | Unclassified | chr12:12942898-12950642   | 5.745   |
| Olfr549       | 0 | 0        | 0 | 11   | 0.183333 | 0        | 4        | Unclassified | chr7:109700799-109703749  | 0.951   |
| Olfr614       | 0 | 0        | 0 | 1    | 0.016667 | 0.00998  | 0        | Unclassified | chr7:110696881-110704018  | 5.138   |
| Olfr616       | 0 | 0        | 0 | 3    | 0.05     | 0.040345 | 2        | Unclassified | chr7:110712838-110715791  | 0.954   |
| Olfr630       | 0 | 0        | 0 | 4    | 0.066667 | 0.016591 | 0        | Unclassified | chr7:110902663-110907864  | 3.202   |
| Rybp          | 0 | 0        | 0 | 405  | 6.75     | 3.45147  | 14.62146 | Stalled      | chr6:100178558-100239352  | 58.795  |
| Ptges3        | 0 | 0        | 0 | 1202 | 20.03333 | 22.166   | 15.7295  | Unclassified | chr10:127494037-127514310 | 18.274  |
| Gltp          | 0 | 0        | 0 | 467  | 7.783333 | 26.9272  | 11.25354 | Unclassified | chr5:115119510-115142944  | 21.435  |
| Ivd           | 0 | 0        | 0 | 306  | 5.1      | 11.2209  | 10.54915 | Unclassified | chr2:118685735-118707093  | 19.359  |
| Mip           | 0 | 0        | 0 | 67   | 1.116667 | 1.26755  | 0.481646 | Unclassified | chr10:127660893-127668867 | 5.975   |
| Rb1           | 0 | 129.7257 | 0 | 747  | 12.45    | 3.32493  | 17.04651 | Unclassified | chr14:73595308-73727598   | 130.291 |
| Copz2         | 0 | 0        | 0 | 44   | 0.733333 | 1.65512  | 1.630933 | Unclassified | chr11:96709189-96722516   | 11.328  |
| Olfr935       | 0 | 0        | 0 | 0    | 0        | 0        | 0        | Unclassified | chr9:38802091-38805018    | 0.928   |
| Klh17         | 0 | 0        | 0 | 338  | 5.633333 | 2.4577   | 20.11036 | Stalled      | chr5:23604407-23667048    | 60.642  |
| Mnpp1         | 0 | 0        | 0 | 651  | 10.85    | 11.7604  | 43.38341 | Unclassified | chr19:32558258-32589860   | 29.603  |
| Zbtb43        | 0 | 0        | 0 | 426  | 7.1      | 2.67281  | 14.34419 | Unclassified | chr2:33305807-33326052    | 18.246  |
| Itih1         | 0 | 0        | 0 | 22   | 0.366667 | 0.012496 | 0.842853 | Unclassified | chr14:31742365-31758475   | 14.111  |
| Itih2         | 0 | 0        | 0 | 78   | 1.3      | 0.073893 | 0.313077 | Unclassified | chr2:10016217-10054310    | 36.094  |
| Itih3         | 0 | 0        | 0 | 36   | 0.6      | 0.022748 | 0.596193 | Unclassified | chr14:31721759-31738773   | 15.015  |
| Itih4         | 0 | 0        | 0 | 47   | 0.783333 | 0.008158 | 0.783504 | Unclassified | chr14:31697677-31715169   | 15.493  |

|                      |   |   |   |      |          |          |          |              |                           |          |
|----------------------|---|---|---|------|----------|----------|----------|--------------|---------------------------|----------|
| <b>Itgb6</b>         | 0 | 0 | 0 | 144  | 2.4      | 0.050346 | 0        | Unclassified | chr2:60436349-60562660    | 124.312  |
| <b>Nrbp2</b>         | 0 | 0 | 0 | 16   | 0.266667 | 0.159034 | 0.509798 | Unclassified | chr15:75916023-75922443   | 4.421    |
| <b>Slc15a5</b>       | 0 | 0 | 0 | 88   | 1.466667 | 0.011423 | 0.522838 | Unclassified | chr6:137932110-138030437  | 96.328   |
| <b>Pghd9</b>         | 0 | 0 | 0 | 1044 | 17.4     | 27.9324  | 2.599914 | Elongating   | chr3:98117093-98145892    | 26.8     |
| <b>Cc2d2a</b>        | 0 | 0 | 0 | 104  | 1.733333 | 0.059533 | 1.766713 | Unclassified | chr5:44051684-44132209    | 78.526   |
| <b>Zfp352</b>        | 0 | 0 | 0 | 3    | 0.05     | 0.056644 | 0.745838 | Unclassified | chr4:89883510-89892378    | 6.869    |
| <b>Lpgat1</b>        | 0 | 0 | 0 | 1109 | 18.48333 | 15.2139  | 11.88266 | Unclassified | chr1:193539902-193608132  | 66.231   |
| <b>Usp46</b>         | 0 | 0 | 0 | 497  | 8.283333 | 1.7881   | 31.39844 | Stalled      | chr5:74396061-74466436    | 68.376   |
| <b>Smyd3</b>         | 0 | 0 | 0 | 1960 | 32.66667 | 5.08995  | 25.46992 | Stalled      | chr1:180885169-181450134  | 562.966  |
| <b>1810013L24Rik</b> | 0 | 0 | 0 | 1183 | 19.71667 | 8.50524  | 14.9931  | Unclassified | chr16:8828192-8859017     | 28.826   |
| <b>Psph</b>          | 0 | 0 | 0 | 561  | 9.35     | 22.4858  | 48.01    | Unclassified | chr5:130271433-130295129  | 21.697   |
| <b>Gsdmc3</b>        | 0 | 0 | 0 | 7    | 0.116667 | 0.008445 | 0        | Unclassified | chr15:63689279-63712113   | 20.835   |
| <b>Rragd</b>         | 0 | 0 | 0 | 62   | 1.033333 | 0.535771 | 4.379703 | Unclassified | chr4:33067972-33109155    | 39.184   |
| <b>Odf2l</b>         | 0 | 0 | 0 | 374  | 6.233333 | 4.51663  | 47.06802 | Stalled      | chr3:144779563-144816879  | 35.317   |
| <b>Rgs7</b>          | 0 | 0 | 0 | 252  | 4.2      | 0.244729 | 1.91226  | Unclassified | chr1:176989206-177424676  | 433.471  |
| <b>Olf178</b>        | 0 | 0 | 0 | 0    | 0        | 0.028247 | 0        | Unclassified | chr16:58889084-58892044   | 0.961    |
| <b>Gm5132</b>        | 0 | 0 | 0 | 0    | 0        | 0        | 0        | Unclassified | chrX:9149085-9151517      | 0.433    |
| <b>Ptx3</b>          | 0 | 0 | 0 | 9    | 0.15     | 0.106692 | 0.4506   | Unclassified | chr3:66021808-66029728    | 5.921    |
| <b>Spata7</b>        | 0 | 0 | 0 | 127  | 2.116667 | 2.4057   | 9.425826 | Unclassified | chr12:99864393-99908024   | 41.632   |
| <b>Cyp2d34</b>       | 0 | 0 | 0 | 7    | 0.116667 | 0.02462  | 0.567972 | Unclassified | chr15:82446394-82453337   | 4.944    |
| <b>Cyp24a1</b>       | 0 | 0 | 0 | 16   | 0.266667 | 0.066104 | 2.724922 | Unclassified | chr2:170308464-170324638  | 14.175   |
| <b>Clec2h</b>        | 0 | 0 | 0 | 10   | 0.166667 | 0.036222 | 1.272297 | Unclassified | chr6:128610403-128627389  | 14.987   |
| <b>Lca5</b>          | 0 | 0 | 0 | 190  | 3.166667 | 1.43135  | 22.00028 | Stalled      | chr9:83284961-83336706    | 49.746   |
| <b>Prr18</b>         | 0 | 0 | 0 | 12   | 0.2      | 0.425071 | 0.850746 | Unclassified | chr17:8531603-8536977     | 3.375    |
| <b>A730017C20Rik</b> | 0 | 0 | 0 | 12   | 0.2      | 0.046268 | 0        | Unclassified | chr18:59220034-59236612   | 14.579   |
| <b>C030019I05Rik</b> | 0 | 0 | 0 | 111  | 1.85     | 2.56506  | 0.81412  | Unclassified | chr11:46047058-46053373   | 4.316    |
| <b>Gm595</b>         | 0 | 0 | 0 | 9    | 0.15     | 0        | 0        | Unclassified | chrX:46194642-46232890    | 36.249   |
| <b>Rbmx2</b>         | 0 | 0 | 0 | 138  | 2.3      | 5.93893  | 20.50751 | Stalled      | chrX:46046180-46063896    | 15.717   |
| <b>Esm1</b>          | 0 | 0 | 0 | 10   | 0.166667 | 0.109528 | 1.661411 | Unclassified | chr13:113997866-114008312 | 8.447    |
| <b>2310047M10Rik</b> | 0 | 0 | 0 | 202  | 3.366667 | 19.4633  | 7.216761 | Unclassified | chr11:68871276-68875078   | 1.803    |
| <b>Epgn</b>          | 0 | 0 | 0 | 4    | 0.066667 | 0.015043 | 0        | Unclassified | chr5:91454542-91464238    | 7.697    |
| <b>Colec11</b>       | 0 | 0 | 0 | 57   | 0.95     | 0.064869 | 2.955267 | Unclassified | chr12:29279037-29310155   | 29.119   |
| <b>Vps72</b>         | 0 | 0 | 0 | 240  | 4        | 21.3507  | 19.0834  | Stalled      | chr3:94912963-94926973    | 12.011   |
| <b>Slc41a3</b>       | 0 | 0 | 0 | 115  | 1.916667 | 0.545134 | 3.412575 | Unclassified | chr6:90552873-90596406    | 41.534   |
| <b>Slc43a1</b>       | 0 | 0 | 0 | 136  | 2.266667 | 4.72257  | 1.382024 | Unclassified | chr2:84677564-84703743    | 24.18    |
| <b>Zfhx4</b>         | 0 | 0 | 0 | 88   | 1.466667 | 0.034179 | 1.405663 | Unclassified | chr3:5216553-5415855      | 197.303  |
| <b>Fcr1s</b>         | 0 | 0 | 0 | 25   | 0.416667 | 0.766018 | 1.134878 | Unclassified | chr3:87054886-87069446    | 12.561   |
| <b>Avp</b>           | 0 | 0 | 0 | 7    | 0.116667 | 0.39149  | 0.604327 | Unclassified | chr2:130406412-130410277  | 1.866    |
| <b>Fgf14</b>         | 0 | 0 | 0 | 271  | 4.516667 | 0        | 0.721028 | Unclassified | chr14:124377512-125078349 | 698.838  |
| <b>Fgf13</b>         | 0 | 0 | 0 | 32   | 0.533333 | 0.658038 | 1.465499 | Unclassified | chrX:56315327-56389613    | 72.287   |
| <b>Fgd1</b>          | 0 | 0 | 0 | 225  | 3.75     | 0.287967 | 0.309678 | Unclassified | chrX:147479775-147523629  | 41.855   |
| <b>Lgr5</b>          | 0 | 0 | 0 | 134  | 2.233333 | 0.323741 | 1.039883 | Unclassified | chr10:114887369-115026836 | 137.468  |
| <b>Fgf12</b>         | 0 | 0 | 0 | 286  | 4.766667 | 0.037794 | 0        | Unclassified | chr16:28160183-28755288   | 593.106  |
| <b>Fgf11</b>         | 0 | 0 | 0 | 81   | 1.35     | 1.58734  | 0.579237 | Unclassified | chr11:69611703-69617127   | 3.425    |
| <b>Fgf10</b>         | 0 | 0 | 0 | 38   | 0.633333 | 0.054582 | 2.773405 | Unclassified | chr13:119501505-119581380 | 77.876   |
| <b>Fgf1</b>          | 0 | 0 | 0 | 120  | 2        | 0.062295 | 0        | Unclassified | chr18:38998326-39080353   | 80.028   |
| <b>Ifi44</b>         | 0 | 0 | 0 | 20   | 0.333333 | 0.586166 | 1.029625 | Unclassified | chr3:151393886-151414923  | 19.038   |
| <b>A830018L16Rik</b> | 0 | 0 | 0 | 239  | 3.983333 | 0.034177 | 0.70293  | Unclassified | chr1:11402192-11965982    | 561.791  |
| <b>Gulo</b>          | 0 | 0 | 0 | 39   | 0.65     | 0.039609 | 2.005147 | Unclassified | chr14:66605623-66630047   | 22.425   |
| <b>Ccdc51</b>        | 0 | 0 | 0 | 361  | 6.016667 | 3.15418  | 31.46257 | Stalled      | chr9:108983009-108995877  | 10.869   |
| <b>Prrx1</b>         | 0 | 0 | 0 | 59   | 0.983333 | 0.137386 | 1.102283 | Unclassified | chr1:165175249-165245781  | 68.533   |
| <b>Acp6</b>          | 0 | 0 | 0 | 196  | 3.266667 | 14.0901  | 16.6634  | Stalled      | chr3:96960699-96980499    | 17.801   |
| <b>Dcn</b>           | 0 | 0 | 0 | 23   | 0.383333 | 0.021772 | 0        | Unclassified | chr10:96943000-96980785   | 35.786   |
| <b>Dck</b>           | 0 | 0 | 0 | 495  | 8.25     | 8.52369  | 25.34174 | Unclassified | chr5:89192037-89212302    | 18.266   |
| <b>Creb12</b>        | 0 | 0 | 0 | 241  | 4.016667 | 3.06201  | 54.90266 | Stalled      | chr6:134778216-134807901  | 27.686   |
| <b>Dbx1</b>          | 0 | 0 | 0 | 41   | 0.683333 | 0.425771 | 0.4411   | Unclassified | chr7:56886868-56894205    | 5.338    |
| <b>Dc1k1</b>         | 0 | 0 | 0 | 209  | 3.483333 | 0.083132 | 1.767805 | Unclassified | chr3:55044447-55342990    | 296.544  |
| <b>Dci</b>           | 0 | 0 | 0 | 526  | 8.766667 | 16.8636  | 32.86497 | Unclassified | chr17:24561627-24576261   | 12.635   |
| <b>Dcc</b>           | 0 | 0 | 0 | 476  | 7.933333 | 0.037239 | 0.698618 | Unclassified | chr18:71413285-72512723   | 1097.439 |
| <b>Prf1</b>          | 0 | 0 | 0 | 41   | 0.683333 | 1.76549  | 5.573662 | Unclassified | chr10:60758583-60767011   | 6.429    |
| <b>Cdk14</b>         | 0 | 0 | 0 | 430  | 7.166667 | 0.221826 | 2.310709 | Unclassified | chr5:4803384-5382251      | 576.868  |
| <b>Olf15</b>         | 0 | 0 | 0 | 3    | 0.05     | 0.109191 | 1        | Unclassified | chr16:3836974-3839913     | 0.94     |
| <b>Fut2</b>          | 0 | 0 | 0 | 33   | 0.55     | 0.140854 | 0        | Unclassified | chr7:52903964-52923678    | 17.715   |
| <b>Pfkm</b>          | 0 | 0 | 0 | 112  | 1.866667 | 5.12889  | 1.176272 | Unclassified | chr15:97940490-97962879   | 20.39    |
| <b>Olf19</b>         | 0 | 0 | 0 | 2    | 0.033333 | 0.110248 | 1        | Unclassified | chr16:16673142-16676072   | 0.931    |
| <b>Mrpl9</b>         | 0 | 0 | 0 | 310  | 5.166667 | 37.7891  | 12.94083 | Unclassified | chr3:94245257-94252630    | 5.374    |
| <b>Nr3c2</b>         | 0 | 0 | 0 | 305  | 5.083333 | 0.028223 | 4.944329 | Unclassified | chr8:79424406-79767538    | 341.133  |
| <b>Pgam1</b>         | 0 | 0 | 0 | 436  | 7.266667 | 47.5808  | 8.669139 | Unclassified | chr19:41984360-41993155   | 6.796    |
| <b>Fut9</b>          | 0 | 0 | 0 | 61   | 1.016667 | 0.012797 | 0        | Unclassified | chr4:25536479-25729150    | 190.672  |
| <b>Myo7b</b>         | 0 | 0 | 0 | 118  | 1.966667 | 0.023287 | 1.21294  | Unclassified | chr18:32118889-32198585   | 77.697   |
| <b>Myo6</b>          | 0 | 0 | 0 | 159  | 2.65     | 0.487063 | 9.211678 | Unclassified | chr9:80010840-80159535    | 146.696  |
| <b>Myoc</b>          | 0 | 0 | 0 | 17   | 0.283333 | 0.030809 | 2.32308  | Unclassified | chr1:164567280-164579825  | 10.546   |
| <b>Myod1</b>         | 0 | 0 | 0 | 7    | 0.116667 | 0.234843 | 0.701299 | Unclassified | chr7:53629843-53634462    | 2.62     |
| <b>Akr1d1</b>        | 0 | 0 | 0 | 25   | 0.416667 | 0.052102 | 0        | Unclassified | chr6:37478172-37518815    | 38.644   |
| <b>Diras1</b>        | 0 | 0 | 0 | 21   | 0.35     | 0.096561 | 1.346057 | Unclassified | chr10:80482334-80490122   | 5.789    |
| <b>Dhrs9</b>         | 0 | 0 | 0 | 24   | 0.4      | 0.109191 | 0.507343 | Unclassified | chr2:69216518-69241143    | 22.626   |
| <b>Sfrp4</b>         | 0 | 0 | 0 | 6    | 0.1      | 0.153068 | 2.227335 | Unclassified | chr13:19713043-19724690   | 9.648    |
| <b>Mkin1</b>         | 0 | 0 | 0 | 753  | 12.55    | 5.71283  | 20.64668 | Unclassified | chr6:31346827-31459477    | 110.651  |
| <b>Foxp3</b>         | 0 | 0 | 0 | 80   | 1.333333 | 0        | 0.324827 | Unclassified | chrX:7154818-7172360      | 15.543   |
| <b>Sez6</b>          | 0 | 0 | 0 | 99   | 1.65     | 0.037603 | 1.404941 | Unclassified | chr11:77742444-77792544   | 48.101   |
| <b>Abcb11</b>        | 0 | 0 | 0 | 44   | 0.733333 | 0.047129 | 0        | Unclassified | chr2:69076338-69182673    | 104.336  |
| <b>Peg12</b>         | 0 | 0 | 0 | 4    | 0.066667 | 0.300705 | 0.621356 | Unclassified | chr7:69606756-69611396    | 2.641    |
| <b>Sfrp1</b>         | 0 | 0 | 0 | 47   | 0.783333 | 0.161304 | 0.938456 | Unclassified | chr8:24519973-24560102    | 38.13    |
| <b>Lypd1</b>         | 0 | 0 | 0 | 39   | 0.65     | 0.013951 | 1.606062 | Unclassified | chr1:127768618-127810791  | 40.174   |
| <b>2610030H06Rik</b> | 0 | 0 | 0 | 220  | 3.666667 | 2.19191  | 35.31054 | Stalled      | chrX:69060117-69070045    | 7.929    |
| <b>Cul4b</b>         | 0 | 0 | 0 | 316  | 5.266667 | 4.76118  | 0.245106 | Unclassified | chrX:35884797-35931373    | 44.577   |

|               |   |          |   |      |          |          |          |              |                           |         |
|---------------|---|----------|---|------|----------|----------|----------|--------------|---------------------------|---------|
| Fam18b        | 0 | 0        | 0 | 403  | 6.716667 | 8.44544  | 23.84481 | Unclassified | chr11:62690991-62708686   | 15.696  |
| Rab3ip        | 0 | 0        | 0 | 382  | 6.366667 | 3.25848  | 16.93705 | Unclassified | chr10:116342839-116389436 | 44.598  |
| Olfr1061      | 0 | 0        | 0 | 1    | 0.016667 | 0        | 0        | Unclassified | chr2:86253265-86256207    | 0.943   |
| 5730494M16Rik | 0 | 0        | 0 | 172  | 2.866667 | 1.80272  | 44.756   | Stalled      | chr18:25285723-25329378   | 41.656  |
| Uts2r         | 0 | 0        | 0 | 8    | 0.133333 | 0.022577 | 3        | Unclassified | chr11:121019584-121023287 | 1.704   |
| Mrgpra2       | 0 | 0        | 0 | 2    | 0.033333 | 0.04059  | 0        | Unclassified | chr7:54719176-54746952    | 25.777  |
| Sdr16c6       | 0 | 0        | 0 | 10   | 0.166667 | 0        | 0        | Unclassified | chr4:3983812-4006661      | 20.85   |
| Tjap1         | 0 | 0        | 0 | 586  | 9.766667 | 9.58704  | 4.36185  | Unclassified | chr17:46394824-46421962   | 25.139  |
| Nploc4        | 0 | 0        | 0 | 1304 | 21.73333 | 15.0921  | 10.35626 | Unclassified | chr11:120241684-120300982 | 57.299  |
| Sike1         | 0 | 0        | 0 | 299  | 4.983333 | 5.80493  | 18.07299 | Unclassified | chr3:102797662-102807837  | 8.176   |
| Sar1b         | 0 | 0        | 0 | 472  | 7.866667 | 34.8034  | 12.38    | Unclassified | chr11:51575164-51605455   | 28.292  |
| Gm5897        | 0 | 0        | 0 | 24   | 0.4      | 3.11087  | 1.062765 | Unclassified | chr7:53038301-53041837    | 1.537   |
| Tmem136       | 0 | 0        | 0 | 21   | 0.35     | 0.168443 | 2.084141 | Unclassified | chr9:42916735-42926653    | 7.919   |
| Sphkap        | 0 | 0        | 0 | 81   | 1.35     | 0.013777 | 1.331636 | Unclassified | chr1:83252355-83406775    | 152.421 |
| Npl           | 0 | 0        | 0 | 93   | 1.55     | 0.438477 | 3.93657  | Unclassified | chr1:155350145-155398844  | 46.7    |
| Sohlh1        | 0 | 0        | 0 | 11   | 0.183333 | 0.069708 | 0        | Unclassified | chr2:25698516-25704768    | 4.253   |
| Olfr1475      | 0 | 0        | 0 | 0    | 0        | 0        | 0        | Unclassified | chr19:13553741-13556686   | 0.946   |
| Pkfb4         | 0 | 0        | 0 | 410  | 6.833333 | 3.71145  | 28.62497 | Stalled      | chr9:108891946-108934739  | 40.794  |
| Slc16a6       | 0 | 0        | 0 | 1442 | 24.03333 | 9.9522   | 12.75509 | Unclassified | chr11:109312169-109336910 | 22.742  |
| Olfr1461      | 0 | 0        | 0 | 0    | 0        | 0        | 0        | Unclassified | chr19:13237505-13240444   | 0.94    |
| Tyw1          | 0 | 0        | 0 | 797  | 13.28333 | 8.52202  | 32.68181 | Unclassified | chr5:130730906-130817437  | 84.532  |
| BC031748      | 0 | 0        | 0 | 98   | 1.633333 | 2.40041  | 31.95417 | Stalled      | chrX:133582132-133617038  | 32.907  |
| Olfr1457      | 0 | 0        | 0 | 2    | 0.033333 | 0        | 0        | Unclassified | chr19:13169182-13172136   | 0.955   |
| Olfr459       | 0 | 0        | 0 | 1    | 0.016667 | 0        | 1        | Unclassified | chr6:41721351-41724296    | 0.946   |
| Gm5158        | 0 | 0        | 0 | 12   | 0.2      | 0.042387 | 1.380652 | Unclassified | chr8:95580625-95605916    | 23.292  |
| BC030500      | 0 | 0        | 0 | 3    | 0.05     | 0.127764 | 0        | Unclassified | chr8:61388551-61393093    | 2.543   |
| 4930402E16Rik | 0 | 0        | 0 | 268  | 4.466667 | 3.03811  | 5.49296  | Unclassified | chr8:113616644-113659044  | 40.401  |
| Dhx15         | 0 | 0        | 0 | 1068 | 17.8     | 39.2376  | 14.62897 | Unclassified | chr5:52541447-52583758    | 40.312  |
| Fam115c       | 0 | 0        | 0 | 14   | 0.233333 | 0.042149 | 1.96875  | Unclassified | chr6:42573041-42597040    | 22      |
| Dnahc9        | 0 | 0        | 0 | 385  | 6.416667 | 0.024192 | 0.469443 | Unclassified | chr11:65644825-65984053   | 337.229 |
| Hoxd8         | 0 | 0        | 0 | 9    | 0.15     | 0.153004 | 5        | Unclassified | chr2:74541545-74545364    | 1.82    |
| Hoxd3         | 0 | 0        | 0 | 60   | 1        | 0.070662 | 1.146944 | Unclassified | chr2:74548049-74586328    | 36.28   |
| Hoxd12        | 0 | 0        | 0 | 7    | 0.116667 | 0.142573 | 0.912157 | Unclassified | chr2:74511086-74515762    | 2.677   |
| Cckar         | 0 | 0        | 0 | 13   | 0.216667 | 0.043757 | 0.855419 | Unclassified | chr5:54089723-54100943    | 9.221   |
| Cckbr         | 0 | 0        | 0 | 16   | 0.266667 | 0.051616 | 0.404762 | Unclassified | chr7:112572333-112584852  | 10.52   |
| Ccna1         | 0 | 0        | 0 | 14   | 0.233333 | 0.081841 | 2.070895 | Unclassified | chr3:54849390-54860977    | 9.588   |
| Nlrc4         | 0 | 0        | 0 | 241  | 4.016667 | 2.28205  | 3.879633 | Unclassified | chr17:74825634-74860448   | 32.815  |
| Arhgap28      | 0 | 0        | 0 | 124  | 2.066667 | 0.164034 | 1.722262 | Unclassified | chr17:68192049-68355448   | 161.4   |
| Ltbp1         | 0 | 0        | 0 | 362  | 6.033333 | 0.198446 | 1.036653 | Unclassified | chr17:75402868-75791109   | 386.242 |
| Hoxd9         | 0 | 0        | 0 | 4    | 0.066667 | 0.167826 | 0.419785 | Unclassified | chr2:74533819-74538265    | 2.447   |
| Olfr1012      | 0 | 0        | 0 | 1    | 0.016667 | 0.041078 | 0        | Unclassified | chr2:85599595-85602531    | 0.937   |
| 5830405N20Rik | 0 | 0        | 0 | 122  | 2.033333 | 2.16649  | 9.947304 | Unclassified | chr10:129757907-129799698 | 39.792  |
| Olfr1115      | 0 | 0        | 0 | 1    | 0.016667 | 0        | 1        | Unclassified | chr2:87089996-87093098    | 1.103   |
| Zfp397os      | 0 | 0        | 0 | 13   | 0.216667 | 0.038087 | 0        | Unclassified | chr18:24129475-24142056   | 10.582  |
| Olfr745       | 0 | 0        | 0 | 1    | 0.016667 | 0.038955 | 0        | Unclassified | chr14:51259869-51263044   | 1.176   |
| Elavl1        | 0 | 0        | 0 | 1072 | 17.86667 | 5.59548  | 12.7824  | Unclassified | chr8:4284781-4327100      | 40.32   |
| Krtap5-1      | 0 | 0        | 0 | 2    | 0.033333 | 0.046738 | 2        | Unclassified | chr7:149482281-149484974  | 0.694   |
| Kcnq3         | 0 | 0        | 0 | 230  | 3.833333 | 0.039104 | 0.562278 | Unclassified | chr15:65826477-66119786   | 291.31  |
| Atp11a        | 0 | 0        | 0 | 1598 | 26.63333 | 6.85051  | 4.124159 | Unclassified | chr8:12755015-12868728    | 111.714 |
| Olfr115       | 0 | 0        | 0 | 1    | 0.016667 | 0        | 1        | Unclassified | chr17:37746730-37749724   | 0.995   |
| Spats2        | 0 | 0        | 0 | 90   | 1.5      | 0.080958 | 1.009682 | Unclassified | chr15:98955275-99042897   | 85.623  |
| Adam1b        | 0 | 0        | 0 | 14   | 0.233333 | 0.543852 | 0.292588 | Unclassified | chr5:121950105-121954989  | 2.885   |
| Tmem74        | 0 | 0        | 0 | 11   | 0.183333 | 0.166721 | 0.840691 | Unclassified | chr15:43698240-43703575   | 3.336   |
| Rgl3          | 0 | 0        | 0 | 35   | 0.583333 | 0.120624 | 1.442891 | Unclassified | chr9:21775970-21795897    | 17.928  |
| Pipox         | 0 | 0        | 0 | 118  | 1.966667 | 0.657433 | 0        | Unclassified | chr11:77694116-77709374   | 13.259  |
| Psp           | 0 | 0        | 0 | 4    | 0.066667 | 0        | 0.772701 | Unclassified | chr2:153832011-153841809  | 7.799   |
| Pspn          | 0 | 0        | 0 | 50   | 0.833333 | 0.162575 | 20       | Unclassified | chr17:57138880-57141441   | 0.562   |
| 1700007K09Rik | 0 | 0        | 0 | 10   | 0.166667 | 0        | 0.782344 | Unclassified | chr7:138469444-138475013  | 3.57    |
| Shf           | 0 | 0        | 0 | 311  | 5.183333 | 3.55301  | 12.23054 | Unclassified | chr2:122174627-122196654  | 20.028  |
| Afm           | 0 | 0        | 0 | 12   | 0.2      | 0.038031 | 0        | Unclassified | chr5:90945974-90982570    | 34.597  |
| Xcr1          | 0 | 27.94093 | 0 | 56   | 0.933333 | 0.276301 | 0.4495   | Unclassified | chr9:123761435-123773246  | 9.812   |
| Mybphl        | 0 | 0        | 0 | 40   | 0.666667 | 0.060265 | 1.500382 | Unclassified | chr3:108165828-108182975  | 15.148  |
| Gm6484        | 0 | 0        | 0 | 33   | 0.55     | 0.088899 | 1.328883 | Unclassified | chr9:21637953-21641791    | 1.839   |
| Bend7         | 0 | 0        | 0 | 85   | 1.416667 | 0.161457 | 2.009608 | Unclassified | chr2:4637190-4721971      | 82.782  |
| Fam92b        | 0 | 0        | 0 | 24   | 0.4      | 0.032365 | 0.669947 | Unclassified | chr8:122690296-122703369  | 11.074  |
| Gm5868        | 0 | 0        | 0 | 2    | 0.033333 | 0.255078 | 0        | Unclassified | chr5:72972877-72980789    | 5.913   |
| Herc3         | 0 | 0        | 0 | 253  | 4.216667 | 2.15427  | 0.770439 | Unclassified | chr6:58781693-58870390    | 86.698  |
| Cyp2ab1       | 0 | 0        | 0 | 24   | 0.4      | 0.037488 | 0.421342 | Unclassified | chr16:20308459-20327477   | 17.019  |
| Pacs1         | 0 | 0        | 0 | 700  | 11.66667 | 5.07301  | 45.64571 | Stalled      | chr19:5133684-5275119     | 139.436 |
| Atl1          | 0 | 0        | 0 | 357  | 5.95     | 0.38449  | 27.19803 | Stalled      | chr12:70992255-71065018   | 70.764  |
| Frs3          | 0 | 0        | 0 | 64   | 1.066667 | 0.498246 | 5.704559 | Unclassified | chr17:47830155-47841235   | 9.081   |
| Gldc          | 0 | 0        | 0 | 146  | 2.433333 | 0.040947 | 0.346951 | Unclassified | chr19:30172936-30251908   | 76.973  |
| Car14         | 0 | 0        | 0 | 119  | 1.983333 | 0.191791 | 0.247834 | Unclassified | chr3:95701722-95710562    | 6.841   |
| Stmn3         | 0 | 0        | 0 | 30   | 0.5      | 0.338459 | 2.163499 | Unclassified | chr2:181041163-181051205  | 8.043   |
| Sox30         | 0 | 0        | 0 | 70   | 1.166667 | 0.222521 | 30.06661 | Stalled      | chr11:45791811-45831494   | 37.684  |
| Fam71f2       | 0 | 0        | 0 | 32   | 0.533333 | 0.239761 | 1.018219 | Unclassified | chr6:29229140-29240676    | 9.537   |
| Bcas1         | 0 | 0        | 0 | 140  | 2.333333 | 0.568746 | 0.739901 | Unclassified | chr2:170172490-170255345  | 80.856  |
| Wasf3         | 0 | 0        | 0 | 80   | 1.333333 | 0.047733 | 1.043655 | Unclassified | chr5:147194581-147282701  | 86.121  |
| A1bg          | 0 | 0        | 0 | 1    | 0.016667 | 0.035152 | 0        | Unclassified | chr15:60749143-60754825   | 3.683   |
| Fnbp1l        | 0 | 0        | 0 | 203  | 3.383333 | 0.201343 | 4.492414 | Unclassified | chr3:122241636-122324585  | 80.95   |
| Ttr           | 0 | 0        | 0 | 12   | 0.2      | 0        | 1.491325 | Unclassified | chr18:20821913-20832820   | 8.908   |
| Ttn           | 0 | 0        | 0 | 367  | 6.116667 | 0.053056 | 0.863928 | Unclassified | chr2:76542040-76822604    | 278.565 |
| Wnt8b         | 0 | 0        | 0 | 38   | 0.633333 | 0.250451 | 0.361349 | Unclassified | chr19:44565961-44588763   | 20.803  |
| Wnt7b         | 0 | 0        | 0 | 70   | 1.166667 | 0.04513  | 0.411141 | Unclassified | chr15:85365869-85414251   | 46.383  |
| Serpinb6e     | 0 | 0        | 0 | 13   | 0.216667 | 0.012858 | 0.955614 | Unclassified | chr13:33924213-33937277   | 11.065  |
| Rel1l         | 0 | 0        | 0 | 348  | 5.8      | 1.96563  | 29.95077 | Stalled      | chr5:64300136-64362136    | 60.001  |

|          |   |   |   |      |          |          |          |              |                           |         |
|----------|---|---|---|------|----------|----------|----------|--------------|---------------------------|---------|
| Gca      | 0 | 0 | 0 | 208  | 3.466667 | 2.79816  | 27.60488 | Stalled      | chr2:62500383-62532166    | 29.784  |
| Ttk      | 0 | 0 | 0 | 434  | 7.233333 | 3.45977  | 63.03086 | Stalled      | chr9:83726295-83765997    | 37.703  |
| Cxcl17   | 0 | 0 | 0 | 31   | 0.516667 | 0        | 0.609502 | Unclassified | chr7:26185071-26199905    | 12.835  |
| Taar6    | 0 | 0 | 0 | 1    | 0.016667 | 0.061736 | 0        | Unclassified | chr10:23704414-23707452   | 1.039   |
| Taar5    | 0 | 0 | 0 | 4    | 0.066667 | 0        | 4        | Unclassified | chr10:23688511-23691525   | 1.015   |
| Taar7a   | 0 | 0 | 0 | 1    | 0.016667 | 0.002448 | 1        | Unclassified | chr10:23712210-23715287   | 1.078   |
| Taar8a   | 0 | 0 | 0 | 3    | 0.05     | 0.036007 | 0        | Unclassified | chr10:23794305-23797340   | 1.036   |
| Rfc3     | 0 | 0 | 0 | 263  | 4.383333 | 0        | 10.10351 | Unclassified | chr5:152445398-152455783  | 8.386   |
| Nup43    | 0 | 0 | 0 | 268  | 4.466667 | 7.54905  | 10.13007 | Unclassified | chr10:7385301-7398684     | 11.384  |
| Lgsn     | 0 | 0 | 0 | 27   | 0.45     | 0.01347  | 0.542671 | Unclassified | chr1:31231279-31261570    | 28.292  |
| Scn3a    | 0 | 0 | 0 | 102  | 1.7      | 0.133444 | 0.52239  | Unclassified | chr2:65295174-65407549    | 110.376 |
| Eras     | 0 | 0 | 0 | 12   | 0.2      | 0.0476   | 1.87493  | Unclassified | chrX:7501401-7507733      | 4.333   |
| Sfmbt2   | 0 | 0 | 0 | 305  | 5.083333 | 0.453895 | 10.79605 | Stalled      | chr2:10292208-10516787    | 222.58  |
| Hsd17b3  | 0 | 0 | 0 | 60   | 1        | 0.019932 | 0        | Unclassified | chr13:64159581-64192509   | 30.929  |
| Ddx46    | 0 | 0 | 0 | 838  | 13.96667 | 19.4665  | 13.73457 | Unclassified | chr13:55734387-55782617   | 46.231  |
| Slc24a3  | 0 | 0 | 0 | 314  | 5.233333 | 0.093632 | 0.559979 | Unclassified | chr2:145066346-145467675  | 399.33  |
| Arid4b   | 0 | 0 | 0 | 1205 | 20.08333 | 5.06672  | 41.77733 | Unclassified | chr13:14154058-14291870   | 135.813 |
| Gdf6     | 0 | 0 | 0 | 37   | 0.616667 | 0.228503 | 0.722725 | Unclassified | chr4:9769518-9789492      | 17.975  |
| Fkbp6    | 0 | 0 | 0 | 81   | 1.35     | 0.018388 | 1.719242 | Unclassified | chr5:135767573-135827861  | 58.289  |
| Dtnbp1   | 0 | 0 | 0 | 1101 | 18.35    | 20.426   | 10.24577 | Unclassified | chr13:45017448-45099465   | 80.018  |
| Tinagl1  | 0 | 0 | 0 | 27   | 0.45     | 0.33624  | 1.195344 | Unclassified | chr4:129842843-129854366  | 9.524   |
| Chmp1a   | 0 | 0 | 0 | 389  | 6.483333 | 20.0276  | 6.000807 | Unclassified | chr8:125728160-125738688  | 8.529   |
| Ntn4     | 0 | 0 | 0 | 99   | 1.65     | 0.462324 | 1.575218 | Unclassified | chr10:93101793-93208717   | 104.925 |
| Tbx21    | 0 | 0 | 0 | 49   | 0.816667 | 1.14964  | 4.898629 | Unclassified | chr11:96959320-96978645   | 17.326  |
| Olf1208  | 0 | 0 | 0 | 1    | 0.016667 | 0        | 0        | Unclassified | chr2:88736825-88739752    | 0.928   |
| Myo16    | 0 | 0 | 0 | 447  | 7.45     | 0.069211 | 1.03795  | Unclassified | chr8:10151922-10633950    | 480.029 |
| AI646023 | 0 | 0 | 0 | 39   | 0.65     | 0.245051 | 1.408983 | Unclassified | chr10:75012869-75025075   | 10.207  |
| Pthlh    | 0 | 0 | 0 | 12   | 0.2      | 0.406632 | 2.313748 | Unclassified | chr6:147200631-147214607  | 11.977  |
| Pth      | 0 | 0 | 0 | 5    | 0.083333 | 0        | 0        | Unclassified | chr7:120529089-120534087  | 2.999   |
| Ptgs1    | 0 | 0 | 0 | 159  | 2.65     | 4.9671   | 3.741724 | Unclassified | chr2:36083945-36107789    | 21.845  |
| Ptgrn    | 0 | 0 | 0 | 92   | 1.533333 | 0.064237 | 0        | Unclassified | chr3:100844158-100916089  | 69.932  |
| Ptgrf    | 0 | 0 | 0 | 20   | 0.333333 | 0.017421 | 1.356223 | Unclassified | chr3:151461573-151502492  | 38.92   |
| Pcdh20   | 0 | 0 | 0 | 4    | 0.066667 | 0.017137 | 0        | Unclassified | chr14:88864555-88873203   | 6.649   |
| Acox1    | 0 | 0 | 0 | 391  | 6.516667 | 6.11625  | 30.72475 | Unclassified | chr11:116033201-116062359 | 27.159  |
| Acp1     | 0 | 0 | 0 | 278  | 4.633333 | 5.30776  | 15.93552 | Unclassified | chr12:31578190-31598477   | 18.288  |
| BC024479 | 0 | 0 | 0 | 545  | 9.083333 | 4.03233  | 40.65309 | Unclassified | chr9:37294905-37331735    | 34.831  |
| Acr      | 0 | 0 | 0 | 11   | 0.183333 | 0.017054 | 0.737728 | Unclassified | chr15:89396756-89405015   | 6.26    |
| Olf171   | 0 | 0 | 0 | 7    | 0.116667 | 0.054596 | 5        | Unclassified | chr4:43718499-43721438    | 0.94    |
| Lyst     | 0 | 0 | 0 | 1542 | 25.7     | 9.77387  | 16.48059 | Unclassified | chr13:13680675-13869707   | 187.033 |
| Morc1    | 0 | 0 | 0 | 108  | 1.8      | 0.025212 | 0.65423  | Unclassified | chr16:48429349-48631018   | 199.67  |
| Hebp2    | 0 | 0 | 0 | 8    | 0.133333 | 0.435971 | 1.493219 | Unclassified | chr10:18259928-18267882   | 5.955   |
| Lyz2     | 0 | 0 | 0 | 6    | 0.1      | 4.76925  | 0.427459 | Unclassified | chr10:116714596-116721328 | 4.733   |
| Olf1032  | 0 | 0 | 0 | 2    | 0.033333 | 0.020589 | 0        | Unclassified | chr2:85845934-85848867    | 0.934   |
| Stard10  | 0 | 0 | 0 | 151  | 2.516667 | 12.9105  | 3.359412 | Unclassified | chr7:108467832-108494826  | 24.995  |
| I11f10   | 0 | 0 | 0 | 6    | 0.1      | 0        | 0.245397 | Unclassified | chr2:24144715-24149340    | 2.626   |
| Snrbp    | 0 | 0 | 0 | 478  | 7.966667 | 100.103  | 6.833451 | Unclassified | chr2:129997371-130007100  | 7.73    |
| Tifa     | 0 | 0 | 0 | 58   | 0.966667 | 2.30781  | 2.816705 | Unclassified | chr3:127490830-127501307  | 8.478   |
| Dffa     | 0 | 0 | 0 | 216  | 3.6      | 28.9729  | 7.022246 | Unclassified | chr4:148476261-148494759  | 16.499  |
| Darc     | 0 | 0 | 0 | 3    | 0.05     | 1.72594  | 1        | Unclassified | chr1:175262016-175265634  | 1.619   |
| Hsd11b2  | 0 | 0 | 0 | 89   | 1.483333 | 0.76901  | 1.549831 | Elongating   | chr8:108040645-108047888  | 5.244   |
| Zfp322a  | 0 | 0 | 0 | 341  | 5.683333 | 1.99502  | 30.04526 | Unclassified | chr13:23444972-23463071   | 16.1    |
| Nfx1     | 0 | 0 | 0 | 1654 | 27.56667 | 12.246   | 17.78323 | Unclassified | chr4:40915975-40973025    | 55.051  |
| Sic17a2  | 0 | 0 | 0 | 11   | 0.183333 | 0.038785 | 0        | Unclassified | chr13:23896895-23915394   | 16.5    |
| Hkdc1    | 0 | 0 | 0 | 59   | 0.983333 | 0.055195 | 1.231928 | Unclassified | chr10:61845884-61887205   | 39.322  |
| Olf1046  | 0 | 0 | 0 | 1    | 0.016667 | 0.047056 | 0        | Unclassified | chr2:86056914-86059865    | 0.952   |
| Tgm2     | 0 | 0 | 0 | 85   | 1.416667 | 0.364636 | 2.251813 | Unclassified | chr2:157942140-157974128  | 29.989  |
| Tgm1     | 0 | 0 | 0 | 48   | 0.8      | 0.246192 | 1.071937 | Unclassified | chr14:56318845-56333925   | 13.081  |
| Tgfb3    | 0 | 0 | 0 | 254  | 4.233333 | 0.451027 | 4.323377 | Unclassified | chr5:107535590-107720614  | 183.025 |
| Tgfb1    | 0 | 0 | 0 | 365  | 6.083333 | 1.30723  | 37.1791  | Stalled      | chr4:47364176-47427796    | 61.621  |
| Tgfb1    | 0 | 0 | 0 | 56   | 0.933333 | 0.679448 | 0.351587 | Unclassified | chr13:56708963-56740700   | 29.738  |
| Cbic     | 0 | 0 | 0 | 79   | 1.316667 | 0.38891  | 2.32918  | Unclassified | chr7:20365066-20384158    | 17.093  |
| Calma4   | 0 | 0 | 0 | 0    | 0        | 0.175003 | 0        | Unclassified | chr13:3835002-3837917     | 0.916   |
| Rs1      | 0 | 0 | 0 | 33   | 0.55     | 0.017557 | 0        | Unclassified | chrX:157203944-157237595  | 31.652  |
| Lsm10    | 0 | 0 | 0 | 167  | 2.783333 | 9.46976  | 5.689866 | Unclassified | chr4:125771896-125775827  | 1.932   |
| Zfp551   | 0 | 0 | 0 | 41   | 0.683333 | 0.927056 | 5.979439 | Unclassified | chr7:13000496-13009840    | 7.345   |
| Dhrs3    | 0 | 0 | 0 | 520  | 8.666667 | 10.0788  | 3.143984 | Unclassified | chr4:144480979-144518112  | 35.134  |
| Plvap    | 0 | 0 | 0 | 71   | 1.183333 | 0.508837 | 0.325356 | Unclassified | chr8:74021652-74037668    | 14.017  |
| Pi4k2a   | 0 | 0 | 0 | 766  | 12.76667 | 10.8877  | 16.43035 | Unclassified | chr19:42162924-42196708   | 31.785  |
| Gdpd3    | 0 | 0 | 0 | 94   | 1.566667 | 0.299341 | 0.839788 | Unclassified | chr7:133907927-133919159  | 9.233   |
| Wdr33    | 0 | 0 | 0 | 1846 | 30.76667 | 16.8253  | 15.74213 | Unclassified | chr18:31961710-32068640   | 104.931 |
| Edc3     | 0 | 0 | 0 | 633  | 10.55    | 8.00967  | 10.36772 | Unclassified | chr9:57554375-57597969    | 41.595  |
| Ttc33    | 0 | 0 | 0 | 306  | 5.1      | 6.93341  | 9.645311 | Unclassified | chr15:5133559-5168332     | 32.774  |
| Lamb3    | 0 | 0 | 0 | 149  | 2.483333 | 1.19761  | 0.43755  | Unclassified | chr1:195126187-195170072  | 41.886  |
| Lgals3   | 0 | 0 | 0 | 100  | 1.666667 | 2.43383  | 1.162174 | Unclassified | chr14:47991534-48005842   | 12.309  |
| Gm14316  | 0 | 0 | 0 | 3    | 0.05     | 0        | 0        | Unclassified | chr2:164538804-164543568  | 2.765   |
| Pkp4     | 0 | 0 | 0 | 672  | 11.2     | 2.7392   | 11.76434 | Stalled      | chr2:58996906-59193262    | 194.357 |
| Tubb6    | 0 | 0 | 0 | 306  | 5.1      | 9.59117  | 5.327766 | Unclassified | chr18:67548384-67562403   | 12.02   |
| Lamc2    | 0 | 0 | 0 | 85   | 1.416667 | 0.166216 | 3.16419  | Unclassified | chr1:154969885-155035577  | 63.693  |
| Lgals7   | 0 | 0 | 0 | 171  | 2.85     | 0.664312 | 0.045028 | Unclassified | chr7:29647404-29651303    | 1.9     |
| Gdf2     | 0 | 0 | 0 | 11   | 0.183333 | 0.017157 | 0.728903 | Unclassified | chr14:34752224-34760384   | 6.161   |
| Bmp8b    | 0 | 0 | 0 | 180  | 3        | 0.108972 | 0.619755 | Unclassified | chr4:122780407-122803334  | 20.928  |
| Bmpr1b   | 0 | 0 | 0 | 84   | 1.4      | 0.031224 | 0        | Unclassified | chr3:141500099-141647215  | 145.117 |
| Bmpr1a   | 0 | 0 | 0 | 86   | 1.433333 | 0.140299 | 6.201894 | Unclassified | chr14:35224253-35317732   | 91.48   |
| Cd300c   | 0 | 0 | 0 | 8    | 0.133333 | 0.074298 | 0.879709 | Unclassified | chr11:114817591-114823731 | 4.141   |
| Bmp8a    | 0 | 0 | 0 | 102  | 1.7      | 1.1194   | 8.102362 | Unclassified | chr4:122989892-123022046  | 30.155  |
| Fam198b  | 0 | 0 | 0 | 51   | 0.85     | 0.261123 | 2.297032 | Unclassified | chr3:79687851-79750199    | 60.349  |



|               |   |   |   |      |          |          |          |              |                           |         |
|---------------|---|---|---|------|----------|----------|----------|--------------|---------------------------|---------|
| Ankar         | 0 | 0 | 0 | 22   | 0.366667 | 0.014013 | 0        | Unclassified | chr1:72689553-72749138    | 57.586  |
| Tmprss11c     | 0 | 0 | 0 | 21   | 0.35     | 0.047615 | 0.739682 | Unclassified | chr5:86660505-86720333    | 57.829  |
| Bmx           | 0 | 0 | 0 | 30   | 0.5      | 0.021325 | 0.736701 | Unclassified | chrX:160630773-160698125  | 65.353  |
| Bmpr2         | 0 | 0 | 0 | 96   | 1.6      | 0.301483 | 2.780408 | Unclassified | chr1:59819480-59927703    | 106.224 |
| Serpina11     | 0 | 0 | 0 | 14   | 0.233333 | 0        | 1.861191 | Unclassified | chr12:105218452-105230153 | 9.702   |
| Foxk2         | 0 | 0 | 0 | 1265 | 21.08333 | 15.4894  | 13.91601 | Unclassified | chr11:121119300-121171208 | 49.909  |
| Dgcr14        | 0 | 0 | 0 | 244  | 4.066667 | 8.70912  | 3.942105 | Unclassified | chr16:17900801-17913441   | 10.641  |
| Fndc5         | 0 | 0 | 0 | 59   | 0.983333 | 0.161199 | 0.329257 | Unclassified | chr4:128812303-128821836  | 7.534   |
| Kremen1       | 0 | 0 | 0 | 438  | 7.3      | 3.11366  | 14.10861 | Unclassified | chr11:5091555-5163613     | 70.059  |
| F11           | 0 | 0 | 0 | 8    | 0.133333 | 0.034268 | 0        | Unclassified | chr8:46326523-46349385    | 20.863  |
| Tceanc        | 0 | 0 | 0 | 257  | 4.283333 | 0.968799 | 32.68317 | Stalled      | chrX:162937746-162950410  | 10.665  |
| Pch2          | 0 | 0 | 0 | 114  | 1.9      | 0.024064 | 0.197704 | Unclassified | chr4:154357234-154387093  | 27.86   |
| Mro           | 0 | 0 | 0 | 30   | 0.5      | 0.087743 | 1.256944 | Unclassified | chr18:74017040-74038788   | 19.749  |
| Dpy19l3       | 0 | 0 | 0 | 700  | 11.66667 | 1.5259   | 17.19037 | Unclassified | chr7:36470520-36541473    | 68.954  |
| Zfand3        | 0 | 0 | 0 | 2692 | 44.86667 | 12.3396  | 16.04777 | Unclassified | chr17:30140031-30346965   | 204.935 |
| Pppad3a1a     | 0 | 0 | 0 | 115  | 1.916667 | 0        | 1.64996  | Unclassified | chr7:136398607-136534821  | 134.215 |
| Itgad         | 0 | 0 | 0 | 55   | 0.916667 | 0.040079 | 1.944543 | Unclassified | chr7:135315468-135349015  | 31.548  |
| Rnd2          | 0 | 0 | 0 | 30   | 0.5      | 1.38643  | 3.294314 | Unclassified | chr11:101327651-101332620 | 2.97    |
| Phox2a        | 0 | 0 | 0 | 20   | 0.333333 | 0.739469 | 0.55634  | Unclassified | chr7:108964826-108971240  | 4.415   |
| Bglap1        | 0 | 0 | 0 | 8    | 0.133333 | 0.317478 | 6        | Unclassified | chr3:88187416-88190386    | 0.971   |
| Rhod          | 0 | 0 | 0 | 33   | 0.55     | 0.679823 | 2.806459 | Unclassified | chr19:4425456-4441424     | 13.969  |
| Serpinf2      | 0 | 0 | 0 | 50   | 0.833333 | 0.088756 | 3.853166 | Unclassified | chr11:75245237-75254977   | 7.741   |
| Plg           | 0 | 0 | 0 | 48   | 0.8      | 0.037216 | 0.458382 | Unclassified | chr17:12569474-12612250   | 40.777  |
| Pri7d1        | 0 | 0 | 0 | 3    | 0.05     | 0        | 0        | Unclassified | chr13:27800891-27810606   | 7.716   |
| Depdc6        | 0 | 0 | 0 | 145  | 2.416667 | 2.17035  | 4.068242 | Unclassified | chr15:54942037-55085757   | 141.721 |
| Jph2          | 0 | 0 | 0 | 92   | 1.533333 | 0.044007 | 0        | Unclassified | chr2:163163508-163225686  | 60.179  |
| Pcbp4         | 0 | 0 | 0 | 121  | 2.016667 | 6.35117  | 9.129335 | Unclassified | chr9:106354187-106366340  | 10.154  |
| Apitd1        | 0 | 0 | 0 | 390  | 6.5      | 24.141   | 6.042793 | Unclassified | chr4:148502457-148513709  | 9.253   |
| Polr3e        | 0 | 0 | 0 | 1100 | 18.33333 | 8.58609  | 4.263616 | Unclassified | chr7:128059257-128090946  | 29.69   |
| Zfp438        | 0 | 0 | 0 | 503  | 8.383333 | 0.435332 | 126.1082 | Stalled      | chr18:5210028-5336437     | 124.41  |
| Ppp2r5e       | 0 | 0 | 0 | 1380 | 23       | 6.93218  | 42.6513  | Unclassified | chr12:76551867-76699187   | 145.321 |
| Zadh2         | 0 | 0 | 0 | 627  | 10.45    | 4.95486  | 12.96141 | Unclassified | chr18:84255549-84266906   | 9.358   |
| Myoz2         | 0 | 0 | 0 | 24   | 0.4      | 0        | 0        | Unclassified | chr3:122709125-122739905  | 28.781  |
| Adamts4       | 0 | 0 | 0 | 18   | 0.3      | 0.200633 | 1.244074 | Unclassified | chr1:173178552-173190053  | 9.502   |
| Efha1         | 0 | 0 | 0 | 712  | 11.86667 | 15.0333  | 21.95112 | Unclassified | chr14:58535116-58620099   | 82.984  |
| Dusp19        | 0 | 0 | 0 | 140  | 2.333333 | 8.16339  | 40.94064 | Stalled      | chr2:80455370-80471818    | 14.449  |
| Dcakd         | 0 | 0 | 0 | 594  | 9.9      | 10.2507  | 9.369137 | Unclassified | chr11:102855369-102880461 | 23.093  |
| Dear1         | 0 | 0 | 0 | 42   | 0.7      | 0.346735 | 36       | Unclassified | chr3:84768977-84771502    | 0.526   |
| Mrps18c       | 0 | 0 | 0 | 297  | 4.95     | 31.1274  | 19.3608  | Unclassified | chr5:101225777-101233486  | 5.71    |
| Smek1         | 0 | 0 | 0 | 1310 | 21.83333 | 17.8053  | 22.05209 | Unclassified | chr12:102277618-102323912 | 44.295  |
| Angel1        | 0 | 0 | 0 | 211  | 3.516667 | 1.60056  | 25.85269 | Stalled      | chr12:88041451-88069410   | 25.96   |
| Olfir339      | 0 | 0 | 0 | 0    | 0        | 0.034436 | 0        | Unclassified | chr2:36274919-36277849    | 0.931   |
| 1110032A13Rik | 0 | 0 | 0 | 195  | 3.25     | 22.1558  | 9.797179 | Unclassified | chr18:80389002-80399358   | 8.357   |
| Cap2          | 0 | 0 | 0 | 185  | 3.083333 | 0.052499 | 0.444332 | Unclassified | chr13:46595515-46745647   | 148.133 |
| Zfp422        | 0 | 0 | 0 | 149  | 2.483333 | 4.03168  | 21.40017 | Stalled      | chr6:116574033-116580995  | 4.963   |
| 2900011008Rik | 0 | 0 | 0 | 104  | 1.733333 | 0.097959 | 1.597207 | Unclassified | chr16:13984729-14101587   | 114.859 |
| 1810037I17Rik | 0 | 0 | 0 | 173  | 2.883333 | 26.1415  | 27.47135 | Unclassified | chr3:122625314-122629112  | 1.799   |
| Mrpl24        | 0 | 0 | 0 | 243  | 4.05     | 34.328   | 4.963026 | Unclassified | chr3:87721465-87727355    | 3.891   |
| Wfdc2         | 0 | 0 | 0 | 10   | 0.166667 | 0.271532 | 0.374609 | Unclassified | chr2:164386215-164394006  | 5.792   |
| Tcp1l12       | 0 | 0 | 0 | 144  | 2.4      | 2.57335  | 11.71658 | Stalled      | chr10:84037691-84077100   | 37.41   |
| Rnf149        | 0 | 0 | 0 | 522  | 8.7      | 6.48871  | 23.01967 | Unclassified | chr1:39608143-39636192    | 26.05   |
| Zdhhc2        | 0 | 0 | 0 | 87   | 1.45     | 1.05164  | 16.76048 | Stalled      | chr8:41507168-41570196    | 61.029  |
| Als2cr4       | 0 | 0 | 0 | 174  | 2.9      | 2.43275  | 65.09409 | Stalled      | chr1:59157436-59178940    | 19.505  |
| Mup21         | 0 | 0 | 0 | 3    | 0.05     | 0        | 0.501371 | Unclassified | chr4:61808865-61813875    | 3.011   |
| Ifi27l2a      | 0 | 0 | 0 | 202  | 3.366667 | 203.141  | 1.709356 | Elongating   | chr12:104680378-104683890 | 1.513   |
| Bat3          | 0 | 0 | 0 | 955  | 15.91667 | 36.6458  | 5.192103 | Unclassified | chr17:35270186-35284181   | 11.996  |
| Tbc1d25       | 0 | 0 | 0 | 221  | 3.683333 | 4.30706  | 14.10194 | Stalled      | chrX:7731597-7755307      | 21.711  |
| Hibch         | 0 | 0 | 0 | 322  | 5.366667 | 4.23719  | 49.26882 | Stalled      | chr1:52899889-52977704    | 75.816  |
| Mrps17        | 0 | 0 | 0 | 259  | 4.316667 | 20.6685  | 7.770688 | Unclassified | chr5:130219402-130224566  | 3.165   |
| Gsdmc         | 0 | 0 | 0 | 9    | 0.15     | 0.036061 | 2.592059 | Unclassified | chr15:63607525-63642294   | 32.77   |
| Gpm6b         | 0 | 0 | 0 | 153  | 2.55     | 0.223969 | 1.510226 | Unclassified | chrX:162674903-162826920  | 150.018 |
| Usp39         | 0 | 0 | 0 | 742  | 12.36667 | 13.8056  | 11.37773 | Unclassified | chr6:72268669-72297169    | 26.501  |
| Pigq          | 0 | 0 | 0 | 552  | 9.2      | 15.0238  | 8.93342  | Unclassified | chr17:26063368-26080907   | 15.54   |
| Gpld1         | 0 | 0 | 0 | 168  | 2.8      | 2.89346  | 1.144377 | Unclassified | chr13:25033020-25083805   | 48.786  |
| Aig1          | 0 | 0 | 0 | 558  | 9.3      | 4.06066  | 17.46419 | Stalled      | chr10:13372514-13590636   | 216.123 |
| Dimt1         | 0 | 0 | 0 | 425  | 7.083333 | 3.09271  | 9.119468 | Unclassified | chr13:107735208-107750304 | 13.097  |
| Gpi1          | 0 | 0 | 0 | 904  | 15.06667 | 162.869  | 8.665547 | Unclassified | chr7:34986345-35017324    | 28.98   |
| Ssr2          | 0 | 0 | 0 | 212  | 3.533333 | 93.4552  | 12.26027 | Unclassified | chr3:88381592-88392335    | 8.744   |
| Nicn1         | 0 | 0 | 0 | 62   | 1.033333 | 5.23416  | 22.18861 | Stalled      | chr9:108190787-108198827  | 6.041   |
| Pdrg1         | 0 | 0 | 0 | 295  | 4.916667 | 27.5894  | 10.44375 | Unclassified | chr2:152834625-152843119  | 6.495   |
| Gphn          | 0 | 0 | 0 | 2215 | 36.91667 | 6.57185  | 87.97051 | Stalled      | chr12:79325641-79785754   | 458.114 |
| Fundc1        | 0 | 0 | 0 | 121  | 2.016667 | 4.71831  | 22.06505 | Stalled      | chrX:17133694-17151423    | 15.73   |
| Cyb5r1        | 0 | 0 | 0 | 302  | 5.033333 | 7.61443  | 10.52066 | Unclassified | chr1:136300566-136308315  | 5.75    |
| Art4          | 0 | 0 | 0 | 62   | 1.033333 | 2.0372   | 0.242766 | Unclassified | chr6:136796971-136808121  | 9.151   |
| Btbd17        | 0 | 0 | 0 | 19   | 0.316667 | 0.442333 | 1.942529 | Unclassified | chr11:114651982-114659206 | 5.225   |
| 6030498E09Rik | 0 | 0 | 0 | 37   | 0.616667 | 0.027023 | 0        | Unclassified | chrX:36123956-36315865    | 189.91  |
| Nme7          | 0 | 0 | 0 | 446  | 7.433333 | 3.69439  | 25.4538  | Stalled      | chr1:166235805-166367425  | 129.621 |
| Col19a1       | 0 | 0 | 0 | 182  | 3.033333 | 0.040086 | 0.644928 | Unclassified | chr1:24264521-24596276    | 329.756 |
| Itg11         | 0 | 0 | 0 | 281  | 4.683333 | 0.075283 | 1.112074 | Unclassified | chr9:62523661-62631786    | 106.126 |
| Adap2         | 0 | 0 | 0 | 60   | 1        | 1.09121  | 3.632592 | Unclassified | chr11:79965663-79992329   | 24.667  |
| Gm4738        | 0 | 0 | 0 | 18   | 0.3      | 0.016725 | 0.3707   | Unclassified | chr8:107605654-107617489  | 9.836   |
| Tmem200a      | 0 | 0 | 0 | 54   | 0.9      | 0.031481 | 1.260162 | Unclassified | chr10:25710991-25800858   | 87.868  |
| Nqo2          | 0 | 0 | 0 | 159  | 2.65     | 1.53758  | 18.8067  | Stalled      | chr13:34054527-34080334   | 23.808  |
| Nmbr          | 0 | 0 | 0 | 6    | 0.1      | 0.174818 | 1.397091 | Unclassified | chr10:14478094-14490362   | 10.269  |
| Mrpl40        | 0 | 0 | 0 | 575  | 9.583333 | 15.2729  | 26.51727 | Unclassified | chr16:18872110-18878730   | 4.621   |
| Zfp72         | 0 | 0 | 0 | 9    | 0.15     | 0.157352 | 0        | Unclassified | chr13:74508873-74516014   | 5.142   |

|                      |   |          |   |      |          |          |          |          |              |                           |         |
|----------------------|---|----------|---|------|----------|----------|----------|----------|--------------|---------------------------|---------|
| <b>Oifr1106</b>      | 0 | 0        | 0 | 0    | 0        | 0        | 0        | 0        | Unclassified | chr2:86888452-86891391    | 0.94    |
| <b>Npw</b>           | 0 | 0        | 0 | 16   | 0.266667 | 1.16261  | 15       | 15       | Unclassified | chr17:24794274-24797370   | 1.097   |
| <b>Dnahc2</b>        | 0 | 0        | 0 | 203  | 3.383333 | 0.046761 | 0.391333 | 0.391333 | Unclassified | chr11:69234310-69364610   | 128.301 |
| <b>Gpr150</b>        | 0 | 0        | 0 | 43   | 0.716667 | 3.92838  | 0.355174 | 0.355174 | Unclassified | chr13:76192298-76196444   | 2.147   |
| <b>Pilrb1</b>        | 0 | 0        | 0 | 3    | 0.05     | 0.094519 | 0        | 0        | Unclassified | chr5:138293374-138301277  | 5.904   |
| <b>Zfp287</b>        | 0 | 0        | 0 | 64   | 1.066667 | 0.613736 | 0.9409   | 0.9409   | Unclassified | chr11:62524987-62544595   | 17.609  |
| <b>Tlr7</b>          | 0 | 0        | 0 | 1053 | 17.55    | 5.31267  | 2.524056 | 2.524056 | Elongating   | chrX:163742862-163770460  | 25.599  |
| <b>Sertad3</b>       | 0 | 0        | 0 | 203  | 3.383333 | 3.97573  | 4.161358 | 4.161358 | Unclassified | chr7:28256858-28262383    | 3.526   |
| <b>Xpnp2</b>         | 0 | 0        | 0 | 83   | 1.383333 | 0.040303 | 0.249483 | 0.249483 | Unclassified | chrX:45459901-45490158    | 28.258  |
| <b>Tlr8</b>          | 0 | 0        | 0 | 5    | 0.083333 | 0.012175 | 0        | 0        | Unclassified | chrX:163680663-163703720  | 21.058  |
| <b>Hsn2</b>          | 0 | 0        | 0 | 38   | 0.633333 | 0        | 0.721085 | 0.721085 | Unclassified | chr6:119912384-119915686  | 1.303   |
| <b>Fig4</b>          | 0 | 0        | 0 | 628  | 10.46667 | 4.62997  | 21.44362 | 21.44362 | Stalled      | chr10:40907977-41025047   | 115.071 |
| <b>Olfm3</b>         | 0 | 0        | 0 | 71   | 1.183333 | 0.019669 | 2.291408 | 2.291408 | Unclassified | chr3:114605280-114828174  | 220.895 |
| <b>Spock3</b>        | 0 | 0        | 0 | 154  | 2.566667 | 0        | 0.726939 | 0.726939 | Unclassified | chr8:65428242-65835893    | 405.652 |
| <b>Krit1</b>         | 0 | 0        | 0 | 586  | 9.766667 | 8.80553  | 66.72711 | 66.72711 | Stalled      | chr5:3801164-3844515      | 41.352  |
| <b>Cmc1</b>          | 0 | 0        | 0 | 517  | 8.616667 | 6.78058  | 27.6805  | 27.6805  | Stalled      | chr9:117974212-118061198  | 84.987  |
| <b>Tax1bp3</b>       | 0 | 0        | 0 | 333  | 5.55     | 2.4751   | 71.27811 | 71.27811 | Stalled      | chr11:72988584-72995548   | 4.965   |
| <b>4833423E24Rik</b> | 0 | 0        | 0 | 16   | 0.266667 | 0.076061 | 0.692906 | 0.692906 | Unclassified | chr2:85324248-85361092    | 34.845  |
| <b>Dld</b>           | 0 | 0        | 0 | 408  | 6.8      | 17.8478  | 28.0504  | 28.0504  | Unclassified | chr12:32016426-32038302   | 19.877  |
| <b>Usp33</b>         | 0 | 0        | 0 | 526  | 8.766667 | 3.94092  | 17.19726 | 17.19726 | Unclassified | chr3:152007444-152056578  | 47.135  |
| <b>Mbd3l1</b>        | 0 | 0        | 0 | 2    | 0.033333 | 0        | 0        | 0        | Unclassified | chr9:18280838-18289736    | 6.899   |
| <b>Glmn</b>          | 0 | 0        | 0 | 516  | 8.6      | 2.17827  | 58.69399 | 58.69399 | Stalled      | chr5:10797985-108028658   | 48.674  |
| <b>Hist1h2ac</b>     | 0 | 0        | 0 | 603  | 10.05    | 0        | 23.77166 | 23.77166 | Stalled      | chr13:23773335-23777828   | 2.494   |
| <b>Hist1h2ad</b>     | 0 | 11.97468 | 0 | 203  | 3.383333 | 0        | 168      | 168      | Unclassified | chr13:23664339-23666732   | 0.394   |
| <b>Hist1h2aa</b>     | 0 | 0        | 0 | 6    | 0.1      | 0        | 6        | 6        | Unclassified | chr13:24024330-24026720   | 0.391   |
| <b>Oifr1014</b>      | 0 | 0        | 0 | 0    | 0        | 0        | 0.07677  | 0        | Unclassified | chr2:85614742-85617660    | 0.919   |
| <b>Oifr1006</b>      | 0 | 0        | 0 | 3    | 0.05     | 0        | 0        | 0        | Unclassified | chr2:85514367-85520898    | 4.532   |
| <b>Oifr446</b>       | 0 | 0        | 0 | 0    | 0        | 0.041411 | 0        | 0        | Unclassified | chr6:42875231-42878158    | 0.928   |
| <b>Oifr437</b>       | 0 | 0        | 0 | 1    | 0.016667 | 0        | 0        | 0        | Unclassified | chr6:43115058-43117991    | 0.934   |
| <b>Oifr1002</b>      | 0 | 0        | 0 | 2    | 0.033333 | 0        | 1        | 1        | Unclassified | chr2:85487519-85490476    | 0.958   |
| <b>Oifr746</b>       | 0 | 0        | 0 | 0    | 0        | 0.01353  | 0        | 0        | Unclassified | chr14:51270913-51273858   | 0.946   |
| <b>Oifr827</b>       | 0 | 0        | 0 | 1    | 0.016667 | 0.029173 | 1        | 1        | Unclassified | chr10:129647215-129650184 | 0.97    |
| <b>Ppp3r1</b>        | 0 | 0        | 0 | 786  | 13.1     | 20.7503  | 18.44615 | 18.44615 | Unclassified | chr11:17057300-17100383   | 41.084  |
| <b>Ppp3r2</b>        | 0 | 0        | 0 | 4    | 0.066667 | 0.055817 | 0.528079 | 0.528079 | Unclassified | chr4:49691618-49696855    | 3.238   |
| <b>4833413D08Rik</b> | 0 | 0        | 0 | 9    | 0.15     | 0.018821 | 0        | 0        | Unclassified | chr2:154081614-154096979  | 13.366  |
| <b>Gsbs</b>          | 0 | 0        | 0 | 14   | 0.233333 | 0.029497 | 0        | 0        | Unclassified | chr6:55965508-55982682    | 15.175  |
| <b>Ppp2ca</b>        | 0 | 0        | 0 | 1065 | 17.75    | 58.9854  | 13.75778 | 13.75778 | Unclassified | chr11:51910325-51936251   | 23.927  |
| <b>Ppp2cb</b>        | 0 | 0        | 0 | 491  | 8.183333 | 15.0934  | 9.467121 | 9.467121 | Unclassified | chr8:34708092-34730276    | 20.185  |
| <b>Ppp3cb</b>        | 0 | 0        | 0 | 922  | 15.36667 | 11.4208  | 26.77401 | 26.77401 | Unclassified | chr14:21318535-21367795   | 47.261  |
| <b>Phf3</b>          | 0 | 0        | 0 | 533  | 8.883333 | 9.28449  | 0.721984 | 0.721984 | Unclassified | chr1:30859186-30922101    | 60.916  |
| <b>Vmn2r37</b>       | 0 | 0        | 0 | 1    | 0.016667 | 0        | 0        | 0        | Unclassified | chr7:8952256-8972357      | 18.102  |
| <b>Fbxo11</b>        | 0 | 0        | 0 | 1911 | 31.85    | 5.49084  | 7.45122  | 7.45122  | Unclassified | chr17:88390198-88466625   | 74.428  |
| <b>Ddx19a</b>        | 0 | 0        | 0 | 631  | 10.51667 | 18.5199  | 17.14581 | 17.14581 | Unclassified | chr8:113498890-113523723  | 22.834  |
| <b>Armc3</b>         | 0 | 0        | 0 | 131  | 2.183333 | 1.27058  | 1.865474 | 1.865474 | Unclassified | chr2:19118744-19231861    | 111.118 |
| <b>Msto1</b>         | 0 | 0        | 0 | 553  | 9.216667 | 16.8823  | 6.602923 | 6.602923 | Unclassified | chr3:88713537-88719872    | 4.336   |
| <b>Tmem20</b>        | 0 | 0        | 0 | 144  | 2.4      | 1.66117  | 18.32059 | 18.32059 | Stalled      | chr19:38468469-38480097   | 9.629   |
| <b>Abcc12</b>        | 0 | 0        | 0 | 79   | 1.316667 | 0.028411 | 1.352517 | 1.352517 | Unclassified | chr8:89028739-89092489    | 61.751  |
| <b>Ccnj</b>          | 0 | 0        | 0 | 503  | 8.383333 | 3.24288  | 12.29808 | 12.29808 | Unclassified | chr19:40903768-40923060   | 17.293  |
| <b>Gm527</b>         | 0 | 0        | 0 | 24   | 0.4      | 0.657023 | 18.70757 | 18.70757 | Stalled      | chr12:66016897-66025578   | 6.682   |
| <b>Tmem199</b>       | 0 | 0        | 0 | 499  | 8.316667 | 13.9212  | 25.88595 | 25.88595 | Unclassified | chr11:78320557-78327670   | 5.114   |
| <b>A630095E13Rik</b> | 0 | 0        | 0 | 1    | 0.016667 | 0        | 1        | 1        | Unclassified | chr9:36443338-36448187    | 2.85    |
| <b>A830080D01Rik</b> | 0 | 0        | 0 | 287  | 4.783333 | 2.01357  | 32.91539 | 32.91539 | Stalled      | chrX:155968599-156031013  | 60.415  |
| <b>Cdkl5</b>         | 0 | 0        | 0 | 191  | 3.183333 | 0.327713 | 32.41146 | 32.41146 | Stalled      | chrX:15722239-157434613   | 210.375 |
| <b>6430548M08Rik</b> | 0 | 0        | 0 | 240  | 4        | 1.1775   | 27.65855 | 27.65855 | Stalled      | chr8:122636051-122689207  | 51.157  |
| <b>Alkbh2</b>        | 0 | 0        | 0 | 251  | 4.183333 | 12.2855  | 7.415584 | 7.415584 | Unclassified | chr5:114573942-114580185  | 4.244   |
| <b>Aqr</b>           | 0 | 0        | 0 | 727  | 12.11667 | 10.7482  | 23.52912 | 23.52912 | Unclassified | chr2:113926908-114003075  | 74.168  |
| <b>Gaint5</b>        | 0 | 0        | 0 | 26   | 0.433333 | 0.051313 | 1.905075 | 1.905075 | Unclassified | chr2:57848565-57891582    | 41.018  |
| <b>Magea9</b>        | 0 | 0        | 0 | 2    | 0.033333 | 0.035017 | 2        | 2        | Unclassified | chrX:70112705-70115437    | 0.733   |
| <b>Arfp2</b>         | 0 | 0        | 0 | 381  | 6.35     | 10.3658  | 14.89158 | 14.89158 | Unclassified | chr7:112782715-112790930  | 6.216   |
| <b>6330527O06Rik</b> | 0 | 0        | 0 | 10   | 0.166667 | 0.039334 | 0        | 0        | Unclassified | chr2:135881662-135895653  | 11.992  |
| <b>Gm1337</b>        | 0 | 0        | 0 | 28   | 0.466667 | 0.635338 | 1.60325  | 1.60325  | Unclassified | chr2:118524838-118531699  | 4.862   |
| <b>Cebpe</b>         | 0 | 0        | 0 | 6    | 0.1      | 0.103524 | 0.213218 | 0.213218 | Unclassified | chr14:55329199-55333011   | 1.813   |
| <b>Tbc1d21</b>       | 0 | 0        | 0 | 15   | 0.25     | 0        | 0.465163 | 0.465163 | Unclassified | chr9:58207610-58220176    | 10.567  |
| <b>Kcmf1</b>         | 0 | 0        | 0 | 1203 | 20.05    | 14.9312  | 10.79623 | 10.79623 | Unclassified | chr6:72791107-72851973    | 58.867  |
| <b>Spatc1</b>        | 0 | 0        | 0 | 37   | 0.616667 | 0.047912 | 1.269803 | 1.269803 | Unclassified | chr15:76096518-76123002   | 24.485  |
| <b>Fkbp8</b>         | 0 | 0        | 0 | 486  | 8.1      | 103.264  | 6.097347 | 6.097347 | Unclassified | chr8:73049641-73059227    | 7.587   |
| <b>Shisa7</b>        | 0 | 0        | 0 | 33   | 0.55     | 0.268815 | 0        | 0        | Unclassified | chr7:4777154-4798298      | 19.145  |
| <b>Spem1</b>         | 0 | 0        | 0 | 6    | 0.1      | 0.099448 | 0.515679 | 0.515679 | Unclassified | chr11:69634372-69637667   | 1.296   |
| <b>Myog</b>          | 0 | 0        | 0 | 6    | 0.1      | 0.060618 | 0.871968 | 0.871968 | Unclassified | chr1:136184580-136189125  | 2.546   |
| <b>Ii9</b>           | 0 | 0        | 0 | 3    | 0.05     | 0        | 0        | 0        | Unclassified | chr13:56580637-56586607   | 2.971   |
| <b>Klra10</b>        | 0 | 0        | 0 | 0    | 0        | 0.009609 | 0        | 0        | Unclassified | chr6:130219211-130233946  | 12.736  |
| <b>Ii6st</b>         | 0 | 0        | 0 | 600  | 10       | 4.19767  | 12.30209 | 12.30209 | Unclassified | chr13:113252277-113297068 | 42.792  |
| <b>Tmem194</b>       | 0 | 0        | 0 | 297  | 4.95     | 3.19     | 17.40568 | 17.40568 | Unclassified | chr10:127112120-127138103 | 23.984  |
| <b>Agpat1</b>        | 0 | 0        | 0 | 88   | 1.466667 | 24.087   | 1.736838 | 1.736838 | Elongating   | chr17:34743958-34750393   | 4.436   |
| <b>Serpina3c</b>     | 0 | 0        | 0 | 14   | 0.233333 | 0.051059 | 1.121125 | 1.121125 | Unclassified | chr12:105385116-105394082 | 6.967   |
| <b>Klkb5</b>         | 0 | 0        | 0 | 3    | 0.05     | 0        | 1.527187 | 1.527187 | Unclassified | chr7:51469844-51476073    | 4.23    |
| <b>Ii5</b>           | 0 | 0        | 0 | 9    | 0.15     | 0.041774 | 1.195163 | 1.195163 | Unclassified | chr11:53532295-53538605   | 4.311   |
| <b>Ii5ra</b>         | 0 | 0        | 0 | 627  | 10.45    | 3.96824  | 3.86653  | 3.86653  | Unclassified | chr6:106660372-106701031  | 38.66   |
| <b>Ii6</b>           | 0 | 0        | 0 | 209  | 3.483333 | 1.36738  | 7.054994 | 7.054994 | Unclassified | chr5:30337700-30346508    | 6.809   |
| <b>Atp1a1</b>        | 0 | 0        | 0 | 1012 | 16.86667 | 42.5462  | 17.4428  | 17.4428  | Unclassified | chr3:101380145-101410580  | 28.436  |
| <b>Srprb</b>         | 0 | 0        | 0 | 332  | 5.533333 | 21.0407  | 6.690547 | 6.690547 | Unclassified | chr9:103090362-103106395  | 14.034  |
| <b>Clu</b>           | 0 | 0        | 0 | 22   | 0.366667 | 0.177217 | 0.776719 | 0.776719 | Unclassified | chr14:66585319-66600382   | 13.064  |
| <b>Oifr688</b>       | 0 | 0        | 0 | 0    | 0        | 0.018693 | 0        | 0        | Unclassified | chr7:112434608-112437574  | 0.967   |
| <b>Ephb4</b>         | 0 | 0        | 0 | 24   | 0.4      | 0.0621   | 0        | 0        | Unclassified | chr5:137789336-137815750  | 24.415  |
| <b>Oifr814</b>       | 0 | 0        | 0 | 0    | 0        | 0.013704 | 0        | 0        | Unclassified | chr10:129310878-129313811 | 0.934   |
| <b>Clock</b>         | 0 | 0        | 0 | 576  | 9.6      | 1.47374  | 32.64906 | 32.64906 | Stalled      | chr5:76641201-76735573    | 92.373  |

|               |   |   |   |      |          |          |          |              |                           |         |
|---------------|---|---|---|------|----------|----------|----------|--------------|---------------------------|---------|
| Klk1b1        | 0 | 0 | 0 | 3    | 0.05     | 0.045394 | 0        | Unclassified | chr7:51220137-51226685    | 4.549   |
| Kcnj1         | 0 | 0 | 0 | 68   | 1.133333 | 0.126144 | 0        | Unclassified | chr9:32178002-32206777    | 26.776  |
| Tagln3        | 0 | 0 | 0 | 48   | 0.8      | 0.804464 | 4.362457 | Unclassified | chr16:45711342-45726644   | 13.303  |
| Cpb2          | 0 | 0 | 0 | 43   | 0.716667 | 0.095709 | 0.489461 | Unclassified | chr14:75640093-75683358   | 41.266  |
| B4galt4       | 0 | 0 | 0 | 95   | 1.583333 | 0.573948 | 6.180077 | Unclassified | chr16:38740376-38769158   | 26.783  |
| Pdlim5        | 0 | 0 | 0 | 648  | 10.8     | 3.53141  | 63.57775 | Stalled      | chr3:141903567-142060582  | 155.016 |
| Ltb4r1        | 0 | 0 | 0 | 13   | 0.216667 | 0.727108 | 0.321444 | Unclassified | chr14:56382798-56387329   | 2.532   |
| Dync1li1      | 0 | 0 | 0 | 593  | 9.883333 | 11.0155  | 23.06932 | Unclassified | chr9:114595948-114632895  | 34.948  |
| Ltbp2         | 0 | 0 | 0 | 185  | 3.083333 | 0.064867 | 2.782969 | Unclassified | chr12:86124161-86219445   | 93.285  |
| Pcdhb18       | 0 | 0 | 0 | 3    | 0.05     | 0.041513 | 0.801587 | Unclassified | chr18:37647118-37654157   | 5.04    |
| Pcdhb17       | 0 | 0 | 0 | 3    | 0.05     | 0.017633 | 2        | Unclassified | chr18:37642674-37647944   | 3.271   |
| Pcdhb14       | 0 | 0 | 0 | 0    | 0        | 0.035851 | 0        | Unclassified | chr18:37605310-37610748   | 3.439   |
| Pcdhb13       | 0 | 0 | 0 | 4    | 0.066667 | 0.021536 | 0        | Unclassified | chr18:37600170-37605863   | 3.694   |
| Pcdhb16       | 0 | 0 | 0 | 4    | 0.066667 | 0.062799 | 0        | Unclassified | chr18:37635421-37642691   | 5.271   |
| Pcdhb15       | 0 | 0 | 0 | 1    | 0.016667 | 0.036684 | 0        | Unclassified | chr18:37631199-37635994   | 2.796   |
| Ltbp3         | 0 | 0 | 0 | 140  | 2.333333 | 0.421788 | 0.216494 | Unclassified | chr19:5738903-5758532     | 17.63   |
| Pcdhb9        | 0 | 0 | 0 | 2    | 0.033333 | 0.027244 | 1        | Unclassified | chr18:37558508-37563563   | 3.056   |
| Pcdhb12       | 0 | 0 | 0 | 1    | 0.016667 | 0.016897 | 1        | Unclassified | chr18:37593274-37598308   | 3.035   |
| Pcdhb11       | 0 | 0 | 0 | 1    | 0.016667 | 0.01564  | 0        | Unclassified | chr18:37579071-37584686   | 3.616   |
| Cacna1a       | 0 | 0 | 0 | 694  | 11.56667 | 0.970279 | 0.739807 | Unclassified | chr8:86937262-87164148    | 224.887 |
| D15Wsu169e    | 0 | 0 | 0 | 445  | 7.416667 | 1.73645  | 6.573217 | Unclassified | chr15:76554414-76650600   | 94.187  |
| Gpr173        | 0 | 0 | 0 | 13   | 0.216667 | 0.015951 | 0.671318 | Unclassified | chrX:148779188-148804654  | 23.467  |
| 3110057012Rik | 0 | 0 | 0 | 114  | 1.9      | 4.02271  | 30.29671 | Stalled      | chr3:40696198-40740229    | 42.032  |
| Sel1l3        | 0 | 0 | 0 | 137  | 2.283333 | 0.076693 | 1.798362 | Unclassified | chr5:53498321-53606691    | 106.371 |
| Neurod4       | 0 | 0 | 0 | 4    | 0.066667 | 0.019157 | 0        | Unclassified | chr10:129705207-129719296 | 12.09   |
| 1700003F12Rik | 0 | 0 | 0 | 33   | 0.55     | 0.786328 | 0.324857 | Unclassified | chr2:154372639-154375784  | 1.146   |
| Cox8c         | 0 | 0 | 0 | 0    | 0        | 0.2154   | 0        | Unclassified | chr12:104135515-104138744 | 1.23    |
| D330038006Rik | 0 | 0 | 0 | 646  | 10.76667 | 3.77066  | 15.85598 | Unclassified | chr8:72285222-72300810    | 13.589  |
| Zfp629        | 0 | 0 | 0 | 91   | 1.516667 | 0.40019  | 2.609929 | Unclassified | chr7:134750548-134759947  | 7.4     |
| Mageb18       | 0 | 0 | 0 | 82   | 1.366667 | 0        | 0.855536 | Unclassified | chrX:89364217-8946911     | 480.695 |
| Adnp2         | 0 | 0 | 0 | 704  | 11.73333 | 4.47043  | 11.90334 | Unclassified | chr18:80323873-80350221   | 24.349  |
| Abhd3         | 0 | 0 | 0 | 46   | 0.766667 | 0.773057 | 1.175353 | Unclassified | chr18:10644408-10708694   | 62.287  |
| Clstn2        | 0 | 0 | 0 | 448  | 7.466667 | 0.017674 | 1.137142 | Unclassified | chr9:97344813-97935586    | 588.774 |
| Popdc2        | 0 | 0 | 0 | 120  | 2        | 0.133806 | 0.592113 | Unclassified | chr16:38360258-38378302   | 16.045  |
| Olf1513       | 0 | 0 | 0 | 2    | 0.033333 | 0.013573 | 0        | Unclassified | chr14:52968778-52971719   | 0.942   |
| Fjx1          | 0 | 0 | 0 | 17   | 0.283333 | 0.89215  | 0.768982 | Unclassified | chr2:102289522-102293949  | 2.428   |
| Gm14459       | 0 | 0 | 0 | 3    | 0.05     | 0.023734 | 1.816581 | Unclassified | chrX:8091177-8104080      | 10.904  |
| Grm3          | 0 | 0 | 0 | 113  | 1.883333 | 0.034394 | 0.681019 | Unclassified | chr5:9485235-9727352      | 240.118 |
| Mageh1        | 0 | 0 | 0 | 28   | 0.466667 | 3.51985  | 6.844889 | Unclassified | chrX:149470708-149474106  | 1.399   |
| Metap1        | 0 | 0 | 0 | 741  | 12.35    | 16.3035  | 14.81713 | Unclassified | chr3:138121923-138154346  | 30.424  |
| Sic13a3       | 0 | 0 | 0 | 109  | 1.816667 | 0.186838 | 1.556776 | Unclassified | chr2:165230794-165300697  | 67.904  |
| 1700029F09Rik | 0 | 0 | 0 | 504  | 8.4      | 11.6999  | 47.97342 | Stalled      | chr1:44143461-44161233    | 15.773  |
| Spaca3        | 0 | 0 | 0 | 13   | 0.216667 | 0        | 1.538991 | Unclassified | chr11:80669890-80681316   | 9.427   |
| Tbl1x         | 0 | 0 | 0 | 915  | 15.25    | 11.4461  | 15.27981 | Unclassified | chrX:74754565-74905604    | 149.04  |
| Fam163a       | 0 | 0 | 0 | 94   | 1.566667 | 0.085838 | 0.696432 | Unclassified | chr1:157923095-158137156  | 212.062 |
| Tbca          | 0 | 0 | 0 | 389  | 6.483333 | 24.3267  | 23.91416 | Stalled      | chr13:95556897-95612854   | 53.958  |
| Tbrg1         | 0 | 0 | 0 | 235  | 3.916667 | 23.3606  | 11.45939 | Unclassified | chr9:37456766-37466897    | 8.132   |
| Zfp3613       | 0 | 0 | 0 | 3    | 0.05     | 0.009949 | 0        | Unclassified | chrX:51075862-51081571    | 3.71    |
| Twf1          | 0 | 0 | 0 | 441  | 7.35     | 5.10988  | 10.49861 | Unclassified | chr15:94408378-94422255   | 11.878  |
| Col4a2        | 0 | 0 | 0 | 367  | 6.116667 | 0.137583 | 0.823527 | Unclassified | chr8:11310828-11449286    | 136.459 |
| Olf1313       | 0 | 0 | 0 | 2    | 0.033333 | 0        | 1        | Unclassified | chr2:111911802-111914738  | 0.937   |
| Olf1038       | 0 | 0 | 0 | 1    | 0.016667 | 0        | 0        | Unclassified | chr2:85958380-85963194    | 2.815   |
| Ptchd1        | 0 | 0 | 0 | 21   | 0.35     | 0.063203 | 0.734611 | Unclassified | chrX:152004278-152059870  | 53.593  |
| Pank3         | 0 | 0 | 0 | 498  | 8.3      | 3.85739  | 17.82457 | Unclassified | chr11:35580996-35604787   | 21.792  |
| Ankrd17       | 0 | 0 | 0 | 1997 | 33.28333 | 9.72623  | 42.90824 | Unclassified | chr5:90656190-90797211    | 139.022 |
| Drd2          | 0 | 0 | 0 | 63   | 1.05     | 0.016548 | 1.061139 | Unclassified | chr9:49146766-49215319    | 66.554  |
| Drd1a         | 0 | 0 | 0 | 17   | 0.283333 | 0.119881 | 2.934572 | Unclassified | chr13:54146552-54153027   | 4.476   |
| 1700008J07Rik | 0 | 0 | 0 | 648  | 10.8     | 7.89763  | 12.72997 | Unclassified | chr7:134653951-134658383  | 2.433   |
| Ccdc89        | 0 | 0 | 0 | 13   | 0.216667 | 0.87223  | 3.22673  | Unclassified | chr7:97572821-97577172    | 2.352   |
| Dpp6          | 0 | 0 | 0 | 747  | 12.45    | 0.023449 | 1.650845 | Unclassified | chr5:27141896-28054040    | 910.145 |
| Ank2          | 0 | 0 | 0 | 61   | 1.016667 | 0.22562  | 0.566669 | Unclassified | chr3:126624524-126703370  | 76.847  |
| Ddo           | 0 | 0 | 0 | 23   | 0.383333 | 0.008544 | 2.10701  | Unclassified | chr10:40347816-40369737   | 19.922  |
| Sic26a3       | 0 | 0 | 0 | 39   | 0.65     | 0.024384 | 2.515346 | Unclassified | chr12:32121165-32158584   | 35.42   |
| Dr1           | 0 | 0 | 0 | 541  | 9.016667 | 19.4298  | 46.64608 | Unclassified | chr5:108695915-108709540  | 11.626  |
| Pak3          | 0 | 0 | 0 | 10   | 0.166667 | 0        | 0.915505 | Unclassified | chrX:140125829-140226343  | 98.515  |
| Fasl          | 0 | 0 | 0 | 15   | 0.25     | 0.052933 | 0.7646   | Unclassified | chr1:163710819-163720626  | 7.808   |
| Akr1c12       | 0 | 0 | 0 | 4    | 0.066667 | 0.08836  | 0        | Unclassified | chr13:4267417-4280645     | 11.229  |
| Atp5h         | 0 | 0 | 0 | 340  | 5.666667 | 56.9455  | 9.999114 | Unclassified | chr11:115277010-115283233 | 4.224   |
| Reg3b         | 0 | 0 | 0 | 0    | 0        | 0.050657 | 0        | Unclassified | chr6:78318878-78323460    | 2.583   |
| 0610010F05Rik | 0 | 0 | 0 | 242  | 4.033333 | 1.4795   | 29.75382 | Stalled      | chr11:23473775-23535631   | 59.857  |
| Gm6320        | 0 | 0 | 0 | 8    | 0.133333 | 0.615227 | 0.580185 | Unclassified | chr13:113782075-113790602 | 6.528   |
| Rnf215        | 0 | 0 | 0 | 247  | 4.116667 | 10.6737  | 7.948361 | Unclassified | chr11:4033162-4041195     | 6.034   |
| Acy3          | 0 | 0 | 0 | 11   | 0.183333 | 0.157742 | 0.502033 | Unclassified | chr19:3984660-3990005     | 3.346   |
| Serpina9      | 0 | 0 | 0 | 22   | 0.366667 | 0.05296  | 1.941515 | Unclassified | chr12:105234829-105253862 | 17.034  |
| Rbm12b        | 0 | 0 | 0 | 85   | 1.416667 | 5.05136  | 19.47986 | Stalled      | chr4:12065263-12073892    | 6.63    |
| Ccdc120       | 0 | 0 | 0 | 27   | 0.45     | 0.20416  | 0        | Unclassified | chrX:7308839-7320450      | 9.612   |
| 1810063B05Rik | 0 | 0 | 0 | 318  | 5.3      | 23.3382  | 21.74702 | Stalled      | chr8:128944400-128949334  | 2.935   |
| Prss33        | 0 | 0 | 0 | 17   | 0.283333 | 0.037122 | 1.560488 | Unclassified | chr17:23970329-23974734   | 2.406   |
| Zfp410        | 0 | 0 | 0 | 490  | 8.166667 | 6.00965  | 21.36127 | Unclassified | chr12:85656079-85684674   | 26.596  |
| Olf1181       | 0 | 0 | 0 | 0    | 0        | 0        | 0        | Unclassified | chr2:88263244-88266180    | 0.937   |
| Nostrin       | 0 | 0 | 0 | 200  | 3.333333 | 0.582237 | 3.122359 | Unclassified | chr2:68971856-69027384    | 53.529  |
| Sall3         | 0 | 0 | 0 | 35   | 0.583333 | 0.046517 | 2.275269 | Unclassified | chr18:81163112-81185317   | 20.206  |
| Snx21         | 0 | 0 | 0 | 200  | 3.333333 | 2.40459  | 1.894434 | Elongating   | chr2:164609520-164618270  | 6.751   |
| Impg2         | 0 | 0 | 0 | 129  | 2.15     | 0.118618 | 0.351992 | Unclassified | chr16:56202425-56273866   | 69.442  |
| Gpr64         | 0 | 0 | 0 | 42   | 0.7      | 0.019352 | 0        | Unclassified | chrX:156826621-156936002  | 107.382 |
| Sox8          | 0 | 0 | 0 | 37   | 0.616667 | 0.662041 | 6.525205 | Unclassified | chr17:25702837-25709631   | 4.795   |

|               |   |   |   |      |          |          |          |              |                           |         |
|---------------|---|---|---|------|----------|----------|----------|--------------|---------------------------|---------|
| Sox7          | 0 | 0 | 0 | 16   | 0.266667 | 0.079181 | 1.880459 | Unclassified | chr14:64560542-64569569   | 7.028   |
| Ppef1         | 0 | 0 | 0 | 25   | 0.416667 | 0.046473 | 0        | Unclassified | chrX:157061026-157159904  | 96.879  |
| Sox9          | 0 | 0 | 0 | 11   | 0.183333 | 0.097371 | 0.362499 | Unclassified | chr11:112641523-112649071 | 5.549   |
| Cym           | 0 | 0 | 0 | 20   | 0.333333 | 0.083088 | 0.331903 | Unclassified | chr3:107014212-107026650  | 10.439  |
| Spa17         | 0 | 0 | 0 | 56   | 0.933333 | 1.47989  | 19.29392 | Stalled      | chr9:37410882-37423199    | 10.318  |
| Dnajb1        | 0 | 0 | 0 | 519  | 8.65     | 19.57    | 11.75152 | Unclassified | chr8:86130073-86135801    | 3.729   |
| Gm10035       | 0 | 0 | 0 | 2    | 0.033333 | 0.32861  | 0.809233 | Unclassified | chr15:100163359-100170600 | 5.242   |
| OlfR884       | 0 | 0 | 0 | 0    | 0        | 0        | 0        | Unclassified | chr9:37852808-37855738    | 0.931   |
| 4921513D23Rik | 0 | 0 | 0 | 655  | 10.91667 | 8.3439   | 20.54472 | Unclassified | chr16:14110625-14161367   | 48.743  |
| Abcb1b        | 0 | 0 | 0 | 1191 | 19.85    | 5.5641   | 19.85501 | Unclassified | chr5:8796146-8866314      | 68.169  |
| Acsbg1        | 0 | 0 | 0 | 136  | 2.266667 | 0.840438 | 0.294328 | Unclassified | chr9:54452803-54511692    | 56.89   |
| Eif3i         | 0 | 0 | 0 | 674  | 11.23333 | 143.958  | 7.380701 | Unclassified | chr4:129269220-129279892  | 8.673   |
| Pgr           | 0 | 0 | 0 | 44   | 0.733333 | 0.053952 | 1.246185 | Unclassified | chr9:8897832-8968611      | 68.78   |
| Pgk2          | 0 | 0 | 0 | 3    | 0.05     | 0.064404 | 0.228693 | Unclassified | chr17:40343962-40347554   | 1.593   |
| Shmt1         | 0 | 0 | 0 | 644  | 10.73333 | 22.2843  | 4.807919 | Unclassified | chr11:60602398-60626767   | 22.37   |
| Rapgef1       | 0 | 0 | 0 | 101  | 1.683333 | 0.757086 | 11.36797 | Stalled      | chr11:98696098-98714319   | 16.222  |
| Sema4c        | 0 | 0 | 0 | 53   | 0.883333 | 0.397458 | 2.102075 | Unclassified | chr1:36605486-36617226    | 9.741   |
| Shd           | 0 | 0 | 0 | 81   | 1.35     | 0.410189 | 9.514252 | Unclassified | chr17:56107904-56116040   | 6.137   |
| Shh           | 0 | 0 | 0 | 17   | 0.283333 | 0.033639 | 0        | Unclassified | chr5:28783379-28795641    | 10.263  |
| Shfm1         | 0 | 0 | 0 | 313  | 5.216667 | 134.671  | 17.62429 | Unclassified | chr6:6508274-6530658      | 20.385  |
| Myl1          | 0 | 0 | 0 | 18   | 0.3      | 0.046949 | 1.136989 | Unclassified | chr1:66970869-66993630    | 20.762  |
| Defb9         | 0 | 0 | 0 | 2    | 0.033333 | 0        | 0        | Unclassified | chr8:22992186-22997906    | 3.721   |
| Spire2        | 0 | 0 | 0 | 59   | 0.983333 | 0.379051 | 2.086485 | Unclassified | chr8:125854612-125893418  | 36.807  |
| Sema6a        | 0 | 0 | 0 | 110  | 1.833333 | 0.087376 | 3.246443 | Unclassified | chr18:47404907-47530522   | 123.616 |
| Chmp1b        | 0 | 0 | 0 | 118  | 1.966667 | 24.6812  | 12.66376 | Unclassified | chr18:67363076-67366655   | 1.58    |
| Trim43a       | 0 | 0 | 0 | 1    | 0.016667 | 0.068304 | 0        | Unclassified | chr9:88473873-88483657    | 7.785   |
| Mcart6        | 0 | 0 | 0 | 513  | 8.55     | 6.45554  | 10.69326 | Unclassified | chrX:133515654-133529571  | 11.918  |
| Sic16a4       | 0 | 0 | 0 | 211  | 3.516667 | 0.076218 | 0.448885 | Unclassified | chr3:107092209-107115033  | 20.825  |
| C2cd4c        | 0 | 0 | 0 | 31   | 0.516667 | 0.18475  | 0.942597 | Unclassified | chr10:79069598-79078763   | 7.166   |
| Hcrr1         | 0 | 0 | 0 | 41   | 0.683333 | 0.041289 | 0.542438 | Unclassified | chr4:129807461-129818406  | 8.946   |
| Dynlrb1       | 0 | 0 | 0 | 301  | 5.016667 | 85.6856  | 13.36344 | Unclassified | chr2:155060268-155076013  | 13.746  |
| OlfR1411      | 0 | 0 | 0 | 0    | 0        | 0.02634  | 0        | Unclassified | chr1:94491097-94494069    | 0.973   |
| Gpr68         | 0 | 0 | 0 | 56   | 0.933333 | 0.109616 | 1.06924  | Unclassified | chr12:102114898-102128089 | 11.192  |
| Tph2          | 0 | 0 | 0 | 85   | 1.416667 | 0.085546 | 2.261625 | Unclassified | chr10:114515698-114624078 | 106.381 |
| Rab21         | 0 | 0 | 0 | 1011 | 16.85    | 25.0325  | 22.27038 | Unclassified | chr10:114726917-114754647 | 25.731  |
| Epb4.2        | 0 | 0 | 0 | 52   | 0.866667 | 0.140271 | 0        | Unclassified | chr2:120843952-120864491  | 18.54   |
| Vash2         | 0 | 0 | 0 | 161  | 2.683333 | 0.440179 | 2.130321 | Unclassified | chr1:192771526-192805175  | 31.65   |
| Cmtm4         | 0 | 0 | 0 | 143  | 2.383333 | 1.90539  | 3.426368 | Unclassified | chr8:106878415-106921596  | 41.182  |
| Pcdhb10       | 0 | 0 | 0 | 4    | 0.066667 | 0.027067 | 1.29627  | Unclassified | chr18:37569327-37574168   | 2.842   |
| Uqcrh         | 0 | 0 | 0 | 365  | 6.083333 | 121.845  | 22.16472 | Unclassified | chr4:115739569-115749675  | 8.107   |
| Trpv1         | 0 | 0 | 0 | 25   | 0.416667 | 0.050858 | 1.508876 | Unclassified | chr11:73049760-73074009   | 22.225  |
| Vmn2r60       | 0 | 0 | 0 | 30   | 0.5      | 0.016036 | 0.736612 | Unclassified | chr7:49369840-49451146    | 79.307  |
| 4921507P07Rik | 0 | 0 | 0 | 52   | 0.866667 | 0.186546 | 15.44631 | Stalled      | chr6:50523302-50548589    | 23.288  |
| Csn1s2a       | 0 | 0 | 0 | 6    | 0.1      | 0        | 0.725757 | Unclassified | chr5:88201591-88217822    | 14.232  |
| Csn3          | 0 | 0 | 0 | 2    | 0.033333 | 0.064202 | 0.849239 | Unclassified | chr5:88352657-88361289    | 6.633   |
| OlfR474       | 0 | 0 | 0 | 0    | 0        | 0        | 0        | Unclassified | chr7:115096156-115099089  | 0.934   |
| 4833420G17Rik | 0 | 0 | 0 | 368  | 6.133333 | 11.187   | 30.0307  | Stalled      | chr13:120249565-120274924 | 23.36   |
| Nipal1        | 0 | 0 | 0 | 46   | 0.766667 | 0.359565 | 4.926092 | Unclassified | chr5:73037034-73062317    | 23.284  |
| 4930403L05Rik | 0 | 0 | 0 | 1    | 0.016667 | 0        | 1        | Unclassified | chrX:14687736-14690615    | 0.88    |
| Ednra         | 0 | 0 | 0 | 63   | 1.05     | 0.063325 | 0        | Unclassified | chr8:80186927-80250351    | 61.425  |
| Pdlim7        | 0 | 0 | 0 | 350  | 5.833333 | 7.6281   | 16.55124 | Unclassified | chr13:55598847-55616800   | 15.954  |
| Thsd1         | 0 | 0 | 0 | 38   | 0.633333 | 0.182244 | 0        | Unclassified | chr8:23346971-23370359    | 21.389  |
| Grp           | 0 | 0 | 0 | 13   | 0.216667 | 0.059404 | 1.09449  | Unclassified | chr18:66031147-66046233   | 13.087  |
| OlfR881       | 0 | 0 | 0 | 0    | 0        | 0.027039 | 0        | Unclassified | chr9:37798076-37801024    | 0.949   |
| Jag1          | 0 | 0 | 0 | 71   | 1.183333 | 0.360512 | 1.50765  | Unclassified | chr2:136907193-136944067  | 34.875  |
| Mup6          | 0 | 0 | 0 | 1    | 0.016667 | 0        | 0        | Unclassified | chr4:60014420-60019086    | 2.667   |
| Defb20        | 0 | 0 | 0 | 6    | 0.1      | 0.055723 | 1.955795 | Unclassified | chr2:152300798-152305670  | 2.873   |
| Eif2c1        | 0 | 0 | 0 | 290  | 4.833333 | 6.45357  | 14.39314 | Unclassified | chr4:126112258-126147665  | 33.408  |
| Lrrc14        | 0 | 0 | 0 | 442  | 7.366667 | 5.9707   | 9.526189 | Unclassified | chr15:76539169-76545521   | 4.353   |
| Capn11        | 0 | 0 | 0 | 99   | 1.65     | 0.26877  | 1.987994 | Unclassified | chr17:45767152-45798258   | 29.107  |
| Prdm10        | 0 | 0 | 0 | 247  | 4.116667 | 1.90624  | 0.206449 | Unclassified | chr9:31120691-31186128    | 63.438  |
| Hmgxb4        | 0 | 0 | 0 | 524  | 8.733333 | 4.82024  | 16.04668 | Unclassified | chr8:77515601-77555871    | 38.271  |
| Pfas          | 0 | 0 | 0 | 951  | 15.85    | 7.82755  | 5.607312 | Unclassified | chr11:68799202-68823962   | 22.761  |
| Hoxb6         | 0 | 0 | 0 | 11   | 0.183333 | 0.193893 | 1.09375  | Unclassified | chr11:96158484-96162883   | 2.4     |
| Hoxb7         | 0 | 0 | 0 | 9    | 0.15     | 0.474679 | 0.386409 | Unclassified | chr11:96145959-96151477   | 3.519   |
| Hoxb8         | 0 | 0 | 0 | 10   | 0.166667 | 0.324648 | 0.57516  | Unclassified | chr11:96141218-96146639   | 3.422   |
| Hoxb9         | 0 | 0 | 0 | 15   | 0.25     | 0.175696 | 2.077448 | Unclassified | chr11:96130643-96137907   | 5.265   |
| Hoxb3         | 0 | 0 | 0 | 55   | 0.916667 | 0.153357 | 1.989193 | Unclassified | chr11:96182439-96209244   | 24.806  |
| Zfp7          | 0 | 0 | 0 | 201  | 3.35     | 1.90048  | 14.55121 | Stalled      | chr15:76707705-76722824   | 13.12   |
| Hoxb4         | 0 | 0 | 0 | 93   | 1.55     | 2.24039  | 6.051145 | Unclassified | chr11:96178052-96182944   | 2.893   |
| Hoxb5         | 0 | 0 | 0 | 10   | 0.166667 | 0.324464 | 0.635002 | Unclassified | chr11:96162825-96167435   | 2.611   |
| Fbxw7         | 0 | 0 | 0 | 854  | 14.23333 | 20.0293  | 1.548221 | Elongating   | chr3:84754132-84781551    | 25.42   |
| Fbxw14        | 0 | 0 | 0 | 0    | 0        | 0.044507 | 0        | Unclassified | chr9:109173638-109192190  | 16.553  |
| Ambr1         | 0 | 0 | 0 | 1679 | 27.98333 | 10.3777  | 19.62689 | Unclassified | chr2:91568294-91759006    | 188.713 |
| Apol7e        | 0 | 0 | 0 | 11   | 0.183333 | 0.119606 | 1.366219 | Unclassified | chr15:77527318-77549718   | 20.401  |
| Fbxo16        | 0 | 0 | 0 | 55   | 0.916667 | 0.041713 | 0.508521 | Unclassified | chr14:65883537-65940339   | 54.803  |
| Ivl           | 0 | 0 | 0 | 1    | 0.016667 | 0.026953 | 0        | Unclassified | chr3:92374823-92379637    | 2.815   |
| Ube2o         | 0 | 0 | 0 | 508  | 8.466667 | 11.811   | 5.972162 | Unclassified | chr11:116399066-116444761 | 43.696  |
| Qrich2        | 0 | 0 | 0 | 176  | 2.933333 | 0.047424 | 0.131393 | Unclassified | chr11:116302638-116317861 | 13.024  |
| Golph3        | 0 | 0 | 0 | 611  | 10.18333 | 17.2412  | 15.57925 | Unclassified | chr15:12249250-12281022   | 29.773  |
| Thg1l         | 0 | 0 | 0 | 323  | 5.383333 | 28.3044  | 15.19251 | Unclassified | chr11:45761655-45770996   | 7.342   |
| EtfA          | 0 | 0 | 0 | 407  | 6.783333 | 23.1074  | 32.30933 | Stalled      | chr9:55302242-55362050    | 57.809  |
| Crebzf        | 0 | 0 | 0 | 456  | 7.6      | 21.1907  | 10.68381 | Unclassified | chr7:97589290-97596229    | 4.94    |
| Atf2          | 0 | 0 | 0 | 657  | 10.95    | 4.14452  | 65.23852 | Stalled      | chr2:73654578-73732685    | 76.108  |
| Rhox4d        | 0 | 0 | 0 | 0    | 0        | 0        | 0        | Unclassified | chrX:34927041-34933682    | 4.642   |
| Fam83a        | 0 | 0 | 0 | 33   | 0.55     | 0.043028 | 0.44239  | Unclassified | chr15:57815457-57842257   | 24.801  |



|               |   |   |   |      |          |          |          |              |                           |          |
|---------------|---|---|---|------|----------|----------|----------|--------------|---------------------------|----------|
| Lrp12         | 0 | 0 | 0 | 175  | 2.916667 | 0.559502 | 17.27334 | Stalled      | chr15:39702148-39777303   | 73.156   |
| Ppme1         | 0 | 0 | 0 | 376  | 6.266667 | 12.2308  | 39.13192 | Stalled      | chr7:107475246-107522406  | 45.161   |
| Ppfbp1        | 0 | 0 | 0 | 495  | 8.25     | 2.0197   | 28.25996 | Stalled      | chr6:146835015-146980545  | 143.531  |
| Usp43         | 0 | 0 | 0 | 77   | 1.283333 | 0.229706 | 0.982541 | Unclassified | chr11:67668024-67737655   | 67.632   |
| Hcfc2         | 0 | 0 | 0 | 427  | 7.116667 | 6.61705  | 33.75847 | Stalled      | chr10:82159751-82204137   | 42.387   |
| Sgcb          | 0 | 0 | 0 | 155  | 2.583333 | 1.70525  | 10.71297 | Stalled      | chr5:74023987-74040970    | 14.984   |
| Bpil1         | 0 | 0 | 0 | 34   | 0.566667 | 0.04445  | 1.628475 | Unclassified | chr2:153698780-153721006  | 20.227   |
| Prdxdd1       | 0 | 0 | 0 | 312  | 5.2      | 12.3093  | 23.23205 | Unclassified | chr11:29413054-29417033   | 1.98     |
| Rgnef         | 0 | 0 | 0 | 269  | 4.483333 | 0.049144 | 3.240879 | Unclassified | chr13:98668549-98978120   | 307.572  |
| Cerkl         | 0 | 0 | 0 | 259  | 4.316667 | 0.899392 | 0.544932 | Unclassified | chr2:79172647-79271145    | 96.499   |
| Timp4         | 0 | 0 | 0 | 14   | 0.233333 | 0.018102 | 1.582168 | Unclassified | chr6:115195633-115203867  | 6.235    |
| Uts2d         | 0 | 0 | 0 | 19   | 0.316667 | 0.061396 | 0.483581 | Unclassified | chr16:27353407-27372325   | 16.919   |
| Gm11545       | 0 | 0 | 0 | 6    | 0.1      | 0.016651 | 0        | Unclassified | chr11:94616449-94624496   | 6.048    |
| Gm12250       | 0 | 0 | 0 | 136  | 2.266667 | 4.62838  | 3.349962 | Unclassified | chr11:57995344-58003700   | 6.357    |
| Gm5775        | 0 | 0 | 0 | 160  | 2.666667 | 0        | 103      | Unclassified | chr7:106628072-106630217  | 0.146    |
| Samd14        | 0 | 0 | 0 | 41   | 0.683333 | 0.3397   | 4.684435 | Unclassified | chr11:94869192-94887401   | 16.21    |
| Ppp1r9b       | 0 | 0 | 0 | 368  | 6.133333 | 14.025   | 4.034465 | Unclassified | chr11:94850525-94868212   | 15.688   |
| Rab14         | 0 | 0 | 0 | 729  | 12.15    | 18.4449  | 13.68658 | Unclassified | chr2:35035724-35058640    | 20.917   |
| Polr3a        | 0 | 0 | 0 | 812  | 13.53333 | 6.24864  | 7.1984   | Unclassified | chr14:25267915-25308268   | 38.354   |
| Xlr           | 0 | 0 | 0 | 10   | 0.166667 | 0.173424 | 1.236277 | Unclassified | chrX:51086924-51102873    | 13.95    |
| Fbxl21        | 0 | 0 | 0 | 28   | 0.466667 | 0.384454 | 9.037975 | Unclassified | chr13:56621868-56639147   | 15.28    |
| Atp6ap1l      | 0 | 0 | 0 | 22   | 0.366667 | 0.447208 | 0.523893 | Unclassified | chr13:91023054-91046960   | 21.907   |
| Tssk1         | 0 | 0 | 0 | 11   | 0.183333 | 0.057402 | 0.737357 | Unclassified | chr16:17892295-17895746   | 1.452    |
| Xlr3a         | 0 | 0 | 0 | 3    | 0.05     | 0.34318  | 1.814883 | Unclassified | chrX:70331631-70344434    | 10.804   |
| Noxa1         | 0 | 0 | 0 | 22   | 0.366667 | 0.327424 | 1.813257 | Unclassified | chr2:24941191-24952725    | 9.535    |
| Xlr3c         | 0 | 0 | 0 | 1    | 0.016667 | 0.274674 | 0        | Unclassified | chrX:70499878-70512729    | 10.852   |
| Tmem132d      | 0 | 0 | 0 | 559  | 9.316667 | 0.026963 | 0.547996 | Unclassified | chr5:128263860-128940937  | 675.078  |
| Rg9mtd3       | 0 | 0 | 0 | 150  | 2.5      | 1.86839  | 2.910541 | Elongating   | chr4:45308039-45329003    | 18.965   |
| Esrp2         | 0 | 0 | 0 | 231  | 3.85     | 0.537078 | 0.220071 | Unclassified | chr8:108655082-108662874  | 5.793    |
| Anxa10        | 0 | 0 | 0 | 25   | 0.416667 | 0.052269 | 0        | Unclassified | chr8:64536317-64603915    | 65.599   |
| Aldh1a7       | 0 | 0 | 0 | 14   | 0.233333 | 0.015546 | 0.770669 | Unclassified | chr19:20767442-20804046   | 34.605   |
| Scrn1         | 0 | 0 | 0 | 65   | 1.083333 | 0.086548 | 1.43128  | Unclassified | chr6:54458809-54518376    | 57.568   |
| Dnaja4        | 0 | 0 | 0 | 278  | 4.633333 | 0.640816 | 2.586355 | Elongating   | chr9:54545365-54564119    | 16.755   |
| Tmem90b       | 0 | 0 | 0 | 121  | 2.016667 | 0.018476 | 1.195983 | Unclassified | chr2:149654578-149830128  | 173.551  |
| Vsig8         | 0 | 0 | 0 | 23   | 0.383333 | 1.73645  | 1.867769 | Unclassified | chr1:174484068-174493847  | 7.78     |
| Olf1222       | 0 | 0 | 0 | 0    | 0        | 0        | 0        | Unclassified | chr2:88964950-88967886    | 0.937    |
| Olf1708       | 0 | 0 | 0 | 0    | 0        | 0.025675 | 0        | Unclassified | chr7:114055713-114058637  | 0.925    |
| Elf5          | 0 | 0 | 0 | 64   | 1.066667 | 0.048318 | 0.375558 | Unclassified | chr2:103250254-103291143  | 38.89    |
| Sctr          | 0 | 0 | 0 | 104  | 1.733333 | 0.066682 | 0.352603 | Unclassified | chr1:121901556-121960109  | 56.554   |
| Elk3          | 0 | 0 | 0 | 1021 | 17.01667 | 5.96849  | 4.127336 | Unclassified | chr10:92710160-92775904   | 63.745   |
| Elk1          | 0 | 0 | 0 | 198  | 3.3      | 5.40208  | 18.53056 | Stalled      | chrX:20510520-20529726    | 17.207   |
| Olf1331       | 0 | 0 | 0 | 0    | 0        | 0.005579 | 0        | Unclassified | chr11:58315099-58318056   | 0.958    |
| Olf1180       | 0 | 0 | 0 | 3    | 0.05     | 0.023787 | 0        | Unclassified | chr16:58915513-58920312   | 2.8      |
| Olf1151       | 0 | 0 | 0 | 2    | 0.033333 | 0        | 0        | Unclassified | chr9:37537562-37540646    | 1.085    |
| Rasl2-9       | 0 | 0 | 0 | 31   | 0.516667 | 25.3256  | 28       | Unclassified | chr7:5076543-5079552      | 1.01     |
| Ppil5         | 0 | 0 | 0 | 228  | 3.8      | 7.8201   | 27.19095 | Stalled      | chr12:70267800-70279997   | 10.198   |
| BC021891      | 0 | 0 | 0 | 54   | 0.9      | 0.081059 | 1.693873 | Unclassified | chr8:128432349-128471339  | 36.991   |
| Tcfcp21l      | 0 | 0 | 0 | 73   | 1.216667 | 0.146551 | 5.805119 | Unclassified | chr1:120522521-120581745  | 57.225   |
| Mycbp         | 0 | 0 | 0 | 224  | 3.733333 | 6.48943  | 16.60636 | Stalled      | chr4:123580255-123589493  | 7.239    |
| Kdm1a         | 0 | 0 | 0 | 596  | 9.933333 | 15.4825  | 15.37237 | Unclassified | chr4:136106449-136160638  | 52.19    |
| Fam154a       | 0 | 0 | 0 | 78   | 1.3      | 0.027938 | 0.593897 | Unclassified | chr4:86090601-86206207    | 113.607  |
| Tgfb2         | 0 | 0 | 0 | 121  | 2.016667 | 0.930144 | 3.429961 | Unclassified | chr1:188447064-188531871  | 82.808   |
| Smarcad1      | 0 | 0 | 0 | 759  | 12.65    | 4.37106  | 34.45001 | Unclassified | chr6:64990660-65066043    | 73.384   |
| 4921523A10Rik | 0 | 0 | 0 | 111  | 1.85     | 0.044256 | 0        | Unclassified | chr17:53646784-53680776   | 31.993   |
| Gm9758        | 0 | 0 | 0 | 0    | 0        | 0        | 0        | Unclassified | chr5:14910123-14916889    | 4.767    |
| Tomm20        | 0 | 0 | 0 | 948  | 15.8     | 44.6605  | 5.31878  | Unclassified | chr8:129458449-129471730  | 11.282   |
| Ccl24         | 0 | 0 | 0 | 11   | 0.183333 | 0.039771 | 0.417095 | Unclassified | chr5:136045806-136050913  | 3.108    |
| Prl8a1        | 0 | 0 | 0 | 2    | 0.033333 | 0        | 0        | Unclassified | chr13:27665790-27676040   | 8.251    |
| 1600027N09Rik | 0 | 0 | 0 | 347  | 5.783333 | 16.2372  | 0.058571 | Unclassified | chr2:180314008-180320339  | 4.332    |
| Rassf6        | 0 | 0 | 0 | 66   | 1.1      | 1.00803  | 4.58219  | Unclassified | chr5:91032101-91071513    | 37.413   |
| Pon3          | 0 | 0 | 0 | 132  | 2.2      | 3.08175  | 9.986976 | Unclassified | chr6:5170851-5208233      | 35.383   |
| Lctl          | 0 | 0 | 0 | 93   | 1.55     | 0.042999 | 0        | Unclassified | chr9:63962953-63985925    | 20.973   |
| Layn          | 0 | 0 | 0 | 31   | 0.516667 | 0.351621 | 3.65166  | Unclassified | chr9:50864885-50887199    | 20.315   |
| Ttll3         | 0 | 0 | 0 | 477  | 7.95     | 0        | 5.899473 | Unclassified | chr6:113340490-113364563  | 22.074   |
| Accn1         | 0 | 0 | 0 | 1075 | 17.91667 | 0.070441 | 1.007521 | Unclassified | chr11:80693666-81783898   | 1088.233 |
| Ly6g5c        | 0 | 0 | 0 | 17   | 0.283333 | 0        | 0.583303 | Unclassified | chr17:35243244-35248898   | 3.655    |
| Ly6g6d        | 0 | 0 | 0 | 1    | 0.016667 | 0.190656 | 0        | Unclassified | chr17:35208292-35213409   | 3.118    |
| Olf1847       | 0 | 0 | 0 | 1    | 0.016667 | 0.027298 | 1        | Unclassified | chr9:19179384-19182323    | 0.94     |
| D630037F22Rik | 0 | 0 | 0 | 446  | 7.433333 | 0.878047 | 36.68736 | Stalled      | chr10:55734099-55950495   | 214.397  |
| Sap25         | 0 | 0 | 0 | 80   | 1.333333 | 12.718   | 1.690316 | Unclassified | chr5:138080700-138084129  | 1.43     |
| Crb1          | 0 | 0 | 0 | 121  | 2.016667 | 0.068143 | 1.198178 | Unclassified | chr1:141094830-141275653  | 178.824  |
| Hnrnpd        | 0 | 0 | 0 | 1206 | 20.1     | 41.4729  | 9.045412 | Unclassified | chr5:100384954-100409957  | 23.004   |
| Cdc42ep4      | 0 | 0 | 0 | 378  | 6.3      | 1.94751  | 5.390453 | Unclassified | chr11:113588163-113614474 | 24.312   |
| Olf1782       | 0 | 0 | 0 | 0    | 0        | 0        | 0        | Unclassified | chr10:128785620-128788565 | 0.946    |
| Olf1249       | 0 | 0 | 0 | 1    | 0.016667 | 0.014943 | 0        | Unclassified | chr2:89470098-89473053    | 0.956    |
| Ophn1         | 0 | 0 | 0 | 88   | 1.466667 | 0.198829 | 1.588981 | Unclassified | chrX:95752853-96088324    | 333.472  |
| Adarb2        | 0 | 0 | 0 | 306  | 5.1      | 0.018792 | 0.646676 | Unclassified | chr13:8200154-8759554     | 557.401  |
| Ccnl2         | 0 | 0 | 0 | 1088 | 18.13333 | 46.2849  | 10.13534 | Unclassified | chr4:155184597-155198652  | 12.056   |
| Cd200         | 0 | 0 | 0 | 131  | 2.183333 | 2.89986  | 10.4708  | Stalled      | chr16:45382247-45411166   | 26.92    |
| Homer2        | 0 | 0 | 0 | 199  | 3.316667 | 0.267905 | 2.532605 | Unclassified | chr7:88745367-88853811    | 106.445  |
| Gbp4          | 0 | 0 | 0 | 256  | 4.266667 | 5.76426  | 3.801293 | Unclassified | chr5:105544785-105570571  | 23.787   |
| Clec4d        | 0 | 0 | 0 | 11   | 0.183333 | 0.365631 | 1.149419 | Unclassified | chr6:123210124-123225285  | 13.162   |
| Mpdz          | 0 | 0 | 0 | 82   | 1.366667 | 0.025582 | 1.347935 | Unclassified | chr4:80924403-81090709    | 164.307  |
| Dner          | 0 | 0 | 0 | 222  | 3.7      | 0.067046 | 1.796431 | Unclassified | chr1:84366413-84694796    | 326.384  |
| Dnajc8        | 0 | 0 | 0 | 554  | 9.233333 | 69.9907  | 7.348841 | Unclassified | chr4:132089473-132109657  | 18.185   |
| Fkbp1a        | 0 | 0 | 0 | 707  | 11.78333 | 41.7749  | 11.51048 | Unclassified | chr2:151366234-151387427  | 19.194   |

|                      |   |   |   |      |          |          |          |              |                           |         |
|----------------------|---|---|---|------|----------|----------|----------|--------------|---------------------------|---------|
| <b>Opa1</b>          | 0 | 0 | 0 | 613  | 10.21667 | 8.71041  | 16.64543 | Unclassified | chr16:29577427-29652576   | 73.15   |
| <b>Tm9sf1</b>        | 0 | 0 | 0 | 635  | 10.58333 | 17.8113  | 10.67096 | Unclassified | chr14:56254802-56264643   | 7.842   |
| <b>Ehhadh</b>        | 0 | 0 | 0 | 120  | 2        | 1.78482  | 14.3908  | Stalled      | chr16:21761357-21789907   | 26.551  |
| <b>F13a1</b>         | 0 | 0 | 0 | 126  | 2.1      | 0.25445  | 0.591553 | Unclassified | chr13:36959046-37143082   | 182.037 |
| <b>Robo4</b>         | 0 | 0 | 0 | 15   | 0.25     | 0.020845 | 0        | Unclassified | chr9:37207630-37221607    | 11.978  |
| <b>Fam158a</b>       | 0 | 0 | 0 | 200  | 3.333333 | 15.3818  | 1.574416 | Elongating   | chr14:56200360-56206091   | 3.732   |
| <b>1300003B13Rik</b> | 0 | 0 | 0 | 70   | 1.166667 | 1.15576  | 19.24186 | Stalled      | chr17:22559234-22593656   | 32.423  |
| <b>OlfR648</b>       | 0 | 0 | 0 | 1    | 0.016667 | 0.175197 | 0        | Unclassified | chr7:111327969-111330920  | 0.952   |
| <b>Imp11</b>         | 0 | 0 | 0 | 337  | 5.616667 | 4.65804  | 41.80201 | Stalled      | chr2:105742794-105805715  | 60.922  |
| <b>Rtn3</b>          | 0 | 0 | 0 | 754  | 12.56667 | 29.9113  | 32.27406 | Unclassified | chr19:7500390-7559771     | 57.382  |
| <b>6430550D23Rik</b> | 0 | 0 | 0 | 160  | 2.666667 | 0.295069 | 17.36111 | Stalled      | chr2:155826179-155835713  | 7.535   |
| <b>7420416P09Rik</b> | 0 | 0 | 0 | 8    | 0.133333 | 0.046559 | 0        | Unclassified | chr12:85981845-85992404   | 8.56    |
| <b>Sico2a1</b>       | 0 | 0 | 0 | 116  | 1.933333 | 0.057202 | 1.234942 | Unclassified | chr9:102908818-102990179  | 79.362  |
| <b>Ano4</b>          | 0 | 0 | 0 | 170  | 2.833333 | 0.021791 | 0        | Unclassified | chr10:88411738-88722535   | 308.798 |
| <b>Ifna12</b>        | 0 | 0 | 0 | 1    | 0.016667 | 0.022604 | 0        | Unclassified | chr4:88248483-88251280    | 0.798   |
| <b>Rtkn</b>          | 0 | 0 | 0 | 57   | 0.95     | 0.411152 | 1.75881  | Unclassified | chr6:83083801-83102572    | 16.772  |
| <b>Rtn2</b>          | 0 | 0 | 0 | 36   | 0.6      | 3.49105  | 3.423757 | Unclassified | chr7:19866015-19881509    | 13.495  |
| <b>Bex6</b>          | 0 | 0 | 0 | 16   | 0.266667 | 0.091266 | 0        | Unclassified | chr16:32177885-32187030   | 7.146   |
| <b>Gm1006</b>        | 0 | 0 | 0 | 41   | 0.683333 | 0.072717 | 1.491185 | Unclassified | chr2:153764597-153789588  | 22.992  |
| <b>Uck1</b>          | 0 | 0 | 0 | 379  | 6.316667 | 13.1182  | 6.695639 | Unclassified | chr2:32110521-32117625    | 5.105   |
| <b>Lhx5</b>          | 0 | 0 | 0 | 33   | 0.55     | 0.566544 | 1.532124 | Unclassified | chr5:120879894-120891466  | 9.573   |
| <b>Lhx4</b>          | 0 | 0 | 0 | 66   | 1.1      | 0.290616 | 1.18795  | Unclassified | chr1:157548823-157591157  | 40.335  |
| <b>Lhx3</b>          | 0 | 0 | 0 | 25   | 0.416667 | 0.028861 | 1.051017 | Unclassified | chr2:26055731-26064076    | 6.346   |
| <b>Lhx2</b>          | 0 | 0 | 0 | 49   | 0.816667 | 0.560644 | 1.852682 | Unclassified | chr2:38204827-38225248    | 18.422  |
| <b>Shc4</b>          | 0 | 0 | 0 | 301  | 5.016667 | 0.629959 | 0.732976 | Unclassified | chr2:125453182-125551884  | 96.703  |
| <b>Themis</b>        | 0 | 0 | 0 | 103  | 1.716667 | 0.096558 | 0.676556 | Unclassified | chr10:28386200-28602555   | 214.356 |
| <b>Lhx6</b>          | 0 | 0 | 0 | 48   | 0.8      | 0.374083 | 0.328045 | Unclassified | chr2:35937472-35962928    | 23.457  |
| <b>Nrbf2</b>         | 0 | 0 | 0 | 546  | 9.1      | 5.53854  | 10.49448 | Unclassified | chr10:66729436-66750029   | 18.594  |
| <b>Kfbp4</b>         | 0 | 0 | 0 | 427  | 7.116667 | 89.9719  | 8.228352 | Unclassified | chr6:128380124-128390649  | 8.526   |
| <b>Fabp7</b>         | 0 | 0 | 0 | 4    | 0.066667 | 0.269109 | 1.116803 | Unclassified | chr10:57502728-57508256   | 3.529   |
| <b>Ugt2b36</b>       | 0 | 0 | 0 | 18   | 0.3      | 0        | 0.615662 | Unclassified | chr5:87494951-87523580    | 26.63   |
| <b>Trim71</b>        | 0 | 0 | 0 | 89   | 1.483333 | 0.106144 | 2.313732 | Unclassified | chr9:114420392-114475487  | 53.096  |
| <b>Pgm3</b>          | 0 | 0 | 0 | 372  | 6.2      | 3.33094  | 17.75996 | Unclassified | chr9:86446082-86467449    | 19.368  |
| <b>6030405A18Rik</b> | 0 | 0 | 0 | 16   | 0.266667 | 0.029081 | 1.792757 | Unclassified | chr3:54700990-54721809    | 18.82   |
| <b>Cpne3</b>         | 0 | 0 | 0 | 257  | 4.283333 | 1.61567  | 20.76713 | Stalled      | chr4:19446398-19499251    | 50.854  |
| <b>Tnn</b>           | 0 | 0 | 0 | 60   | 1        | 0.015444 | 1.076014 | Unclassified | chr1:162015164-162085706  | 68.543  |
| <b>2010110P09Rik</b> | 0 | 0 | 0 | 11   | 0.183333 | 0.109448 | 1.216056 | Unclassified | chr7:129361009-129366053  | 3.045   |
| <b>Zyg11b</b>        | 0 | 0 | 0 | 544  | 9.066667 | 2.90388  | 23.57088 | Unclassified | chr4:107900359-107975695  | 73.337  |
| <b>Htr4</b>          | 0 | 0 | 0 | 76   | 1.266667 | 0.019264 | 1.335206 | Unclassified | chr18:62481857-62627456   | 143.6   |
| <b>Vamp5</b>         | 0 | 0 | 0 | 89   | 1.483333 | 1.74569  | 5.850468 | Unclassified | chr6:72318042-72332462    | 12.421  |
| <b>Gria3</b>         | 0 | 0 | 0 | 106  | 1.766667 | 0.14804  | 0        | Unclassified | chrX:38752480-39031778    | 277.299 |
| <b>Cldn7</b>         | 0 | 0 | 0 | 65   | 1.083333 | 0.943147 | 0.164235 | Unclassified | chr11:69777002-69781380   | 2.379   |
| <b>Porcn</b>         | 0 | 0 | 0 | 22   | 0.366667 | 0.275176 | 2.035952 | Unclassified | chrX:7770975-7785651      | 12.677  |
| <b>Inmt</b>          | 0 | 0 | 0 | 5    | 0.083333 | 0.025056 | 0.528672 | Unclassified | chr6:55120620-55126984    | 4.365   |
| <b>OlfR530</b>       | 0 | 0 | 0 | 4    | 0.066667 | 0.055416 | 2        | Unclassified | chr7:147558583-147561507  | 0.925   |
| <b>1700018C11Rik</b> | 0 | 0 | 0 | 26   | 0.433333 | 0        | 2.580684 | Unclassified | chr4:63268124-63285463    | 15.34   |
| <b>Tep1</b>          | 0 | 0 | 0 | 375  | 6.25     | 3.72041  | 26.41695 | Stalled      | chr14:51443735-51492229   | 46.495  |
| <b>Adad1</b>         | 0 | 0 | 0 | 19   | 0.316667 | 0.032496 | 1.490916 | Unclassified | chr3:36960577-37010434    | 47.858  |
| <b>Ndufv3</b>        | 0 | 0 | 0 | 310  | 5.166667 | 118.852  | 14.03825 | Unclassified | chr17:31655059-31668270   | 11.212  |
| <b>Terf1</b>         | 0 | 0 | 0 | 628  | 10.46667 | 9.9001   | 18.56818 | Unclassified | chr1:15793738-15833510    | 37.773  |
| <b>Terc</b>          | 0 | 0 | 0 | 238  | 3.966667 | 10.749   | 237      | Unclassified | chr3:96218359-96220756    | 0.398   |
| <b>Dmrtc2</b>        | 0 | 0 | 0 | 12   | 0.2      | 0.031581 | 1.268009 | Unclassified | chr7:25653078-25662666    | 7.589   |
| <b>Sec22c</b>        | 0 | 0 | 0 | 241  | 4.016667 | 1.48814  | 19.40177 | Stalled      | chr9:121589163-121616147  | 24.985  |
| <b>Cd1d1</b>         | 0 | 0 | 0 | 96   | 1.6      | 4.67352  | 27.37703 | Stalled      | chr3:86799757-86805262    | 3.506   |
| <b>Fam12</b>         | 0 | 0 | 0 | 1    | 0.016667 | 0        | 0        | Unclassified | chr14:51734227-51737466   | 1.24    |
| <b>Rsb1l1</b>        | 0 | 0 | 0 | 1186 | 19.76667 | 3.77613  | 22.40782 | Unclassified | chr5:20398841-20459640    | 58.8    |
| <b>Klhl32</b>        | 0 | 0 | 0 | 320  | 5.333333 | 1.03464  | 3.853029 | Unclassified | chr4:24544419-24780233    | 233.815 |
| <b>OlfR335</b>       | 0 | 0 | 0 | 2    | 0.333333 | 0.027298 | 0        | Unclassified | chr2:36155016-36157999    | 0.984   |
| <b>Ssx3</b>          | 0 | 0 | 0 | 0    | 0        | 0        | 0        | Unclassified | chrX:8160669-8168372      | 5.704   |
| <b>Pum2</b>          | 0 | 0 | 0 | 1438 | 23.96667 | 12.9911  | 32.16038 | Unclassified | chr12:8678939-8759387     | 78.449  |
| <b>Pum1</b>          | 0 | 0 | 0 | 2726 | 45.43333 | 11.6609  | 12.61111 | Unclassified | chr4:130217273-130337477  | 118.205 |
| <b>Gpr84</b>         | 0 | 0 | 0 | 13   | 0.216667 | 0.4049   | 0        | Unclassified | chr15:103138665-103142869 | 2.205   |
| <b>Dusp12</b>        | 0 | 0 | 0 | 318  | 5.3      | 10.3896  | 10.59391 | Unclassified | chr1:172804318-172817671  | 11.354  |
| <b>Map4k5</b>        | 0 | 0 | 0 | 753  | 12.55    | 2.29032  | 16.91626 | Unclassified | chr12:70904743-70996150   | 89.408  |
| <b>Gpr11</b>         | 0 | 0 | 0 | 27   | 0.45     | 0.105229 | 1.028459 | Unclassified | chr13:54838033-54853030   | 12.998  |
| <b>Figla</b>         | 0 | 0 | 0 | 4    | 0.066667 | 0        | 0.483382 | Unclassified | chr6:85965184-85970990    | 3.807   |
| <b>Pds5a</b>         | 0 | 0 | 0 | 1614 | 26.9     | 18.1612  | 14.26632 | Unclassified | chr5:66006498-66091095    | 82.598  |
| <b>OlfR971</b>       | 0 | 0 | 0 | 0    | 0        | 0        | 0        | Unclassified | chr9:39645020-39647944    | 0.925   |
| <b>Lect2</b>         | 0 | 0 | 0 | 8    | 0.133333 | 0.102297 | 0.503968 | Unclassified | chr13:56643820-56651899   | 6.08    |
| <b>Ahctf1</b>        | 0 | 0 | 0 | 1214 | 20.23333 | 10.0356  | 17.31215 | Unclassified | chr1:181675034-181736146  | 59.113  |
| <b>Abra</b>          | 0 | 0 | 0 | 16   | 0.266667 | 0.363687 | 0.444488 | Unclassified | chr15:41696838-41703266   | 4.429   |
| <b>Cnst</b>          | 0 | 0 | 0 | 598  | 9.966667 | 4.62968  | 29.63133 | Unclassified | chr1:181474659-181557604  | 80.946  |
| <b>Fut4</b>          | 0 | 0 | 0 | 131  | 2.183333 | 2.22758  | 8.93006  | Unclassified | chr9:14552902-14558566    | 3.665   |
| <b>Ifitm1</b>        | 0 | 0 | 0 | 5    | 0.083333 | 0.553703 | 0        | Unclassified | chr7:148151327-148155726  | 2.4     |
| <b>6720463M24Rik</b> | 0 | 0 | 0 | 723  | 12.05    | 11.7371  | 18.49864 | Unclassified | chr14:99443595-99473326   | 27.732  |
| <b>Lrp3</b>          | 0 | 0 | 0 | 26   | 0.433333 | 0.0358   | 0.358512 | Unclassified | chr7:35985952-36002364    | 14.413  |
| <b>Tmem132c</b>      | 0 | 0 | 0 | 342  | 5.7      | 0.035093 | 1.954509 | Unclassified | chr5:127720195-128046160  | 323.966 |
| <b>rpf2</b>          | 0 | 0 | 0 | 629  | 10.48333 | 19.3545  | 10.53192 | Unclassified | chr10:39943051-39968785   | 23.735  |
| <b>2810453I06Rik</b> | 0 | 0 | 0 | 178  | 2.966667 | 3.58191  | 19.62172 | Stalled      | chr5:144307573-144325393  | 15.821  |
| <b>Mansc1</b>        | 0 | 0 | 0 | 51   | 0.85     | 0.924514 | 5.542589 | Unclassified | chr6:134559225-134584506  | 23.282  |
| <b>OlfR973</b>       | 0 | 0 | 0 | 1    | 0.016667 | 0        | 0        | Unclassified | chr9:39715389-39718313    | 0.925   |
| <b>Krtap31-2</b>     | 0 | 0 | 0 | 2    | 0.033333 | 0.075374 | 1        | Unclassified | chr11:99795604-99798539   | 0.936   |
| <b>Zfp329</b>        | 0 | 0 | 0 | 295  | 4.916667 | 1.6678   | 25.64697 | Stalled      | chr7:13389126-13406209    | 15.084  |
| <b>Zkscan14</b>      | 0 | 0 | 0 | 231  | 3.85     | 9.51412  | 9.092648 | Unclassified | chr5:145955814-145964751  | 6.938   |
| <b>Ogn</b>           | 0 | 0 | 0 | 24   | 0.4      | 0        | 0.401525 | Unclassified | chr13:49701439-49719869   | 16.431  |
| <b>Chsy1</b>         | 0 | 0 | 0 | 955  | 15.91667 | 5.75053  | 15.27013 | Unclassified | chr7:73252400-73318684    | 64.285  |

|               |   |   |   |      |          |          |          |              |                           |         |
|---------------|---|---|---|------|----------|----------|----------|--------------|---------------------------|---------|
| Nobox         | 0 | 0 | 0 | 11   | 0.183333 | 0.013541 | 0.703357 | Unclassified | chr6:43253672-43261553    | 5.882   |
| Sebox         | 0 | 0 | 0 | 92   | 1.533333 | 0.019932 | 0.906312 | Unclassified | chr11:78315014-78318584   | 1.571   |
| Sc5d          | 0 | 0 | 0 | 615  | 10.25    | 16.0955  | 10.62426 | Unclassified | chr9:42062259-42074383    | 10.125  |
| Ubf1          | 0 | 0 | 0 | 625  | 10.41667 | 7.48253  | 16.033   | Unclassified | chr7:129208711-129225713  | 15.003  |
| Ing4          | 0 | 0 | 0 | 212  | 3.533333 | 10.9042  | 4.654161 | Unclassified | chr6:124987865-124999282  | 9.418   |
| Gpr12         | 0 | 0 | 0 | 4    | 0.066667 | 0.550159 | 2.02944  | Unclassified | chr5:147393725-147398815  | 3.091   |
| S1pr2         | 0 | 0 | 0 | 126  | 2.1      | 2.8358   | 6.937879 | Unclassified | chr9:20770395-20783237    | 10.843  |
| Olfr968       | 0 | 0 | 0 | 1    | 0.016667 | 0        | 1        | Unclassified | chr9:39579438-39582383    | 0.946   |
| Gpc1          | 0 | 0 | 0 | 65   | 1.083333 | 0.245358 | 1.302158 | Unclassified | chr1:94726262-94756773    | 28.512  |
| Gpaa1         | 0 | 0 | 0 | 371  | 6.183333 | 14.5572  | 9.514992 | Unclassified | chr15:76159723-76165329   | 3.607   |
| Grin1a        | 0 | 0 | 0 | 531  | 8.85     | 48.9392  | 4.601062 | Unclassified | chr9:71326244-71335790    | 7.547   |
| Gpc3          | 0 | 0 | 0 | 107  | 1.783333 | 0.033936 | 1.528669 | Unclassified | chrX:49625605-49699151    | 341.547 |
| Gpc4          | 0 | 0 | 0 | 32   | 0.533333 | 0.049633 | 1.574184 | Unclassified | chrX:49406195-49520100    | 111.906 |
| Olfr482       | 0 | 0 | 0 | 0    | 0        | 0.005424 | 0        | Unclassified | chr7:115238110-115241082  | 0.973   |
| 4930408021Rik | 0 | 0 | 0 | 94   | 1.566667 | 0.126001 | 0.301322 | Unclassified | chr7:127802809-127815857  | 11.049  |
| Ccdc125       | 0 | 0 | 0 | 262  | 4.366667 | 3.40225  | 17.64827 | Stalled      | chr13:101437435-101467194 | 27.76   |
| Ncapg2        | 0 | 0 | 0 | 1075 | 17.91667 | 8.15942  | 20.70039 | Unclassified | chr12:117641874-117702004 | 58.131  |
| Hormad1       | 0 | 0 | 0 | 25   | 0.416667 | 0.011971 | 0.562464 | Unclassified | chr3:95361598-95391593    | 27.996  |
| Gm9785        | 0 | 0 | 0 | 3    | 0.05     | 0.076601 | 2        | Unclassified | chrX:100720833-100723418  | 0.586   |
| Bnc1          | 0 | 0 | 0 | 35   | 0.583333 | 0.060467 | 1.352825 | Unclassified | chr7:89111547-89139185    | 25.639  |
| Lyve1         | 0 | 0 | 0 | 12   | 0.2      | 0.054077 | 0.507786 | Unclassified | chr7:117994120-118008467  | 12.348  |
| Tmem30b       | 0 | 0 | 0 | 7    | 0.116667 | 0.167808 | 0.864282 | Unclassified | chr12:74644100-74649382   | 3.283   |
| Olfr970       | 0 | 0 | 0 | 0    | 0        | 0.061601 | 0        | Unclassified | chr9:39625225-39628161    | 0.937   |
| Gnpda2        | 0 | 0 | 0 | 191  | 3.183333 | 2.53816  | 19.55213 | Stalled      | chr5:69966240-69985524    | 17.285  |
| Gpr135        | 0 | 0 | 0 | 13   | 0.216667 | 4.64418  | 0.666667 | Unclassified | chr12:73170604-73173978   | 1.375   |
| Tbx20         | 0 | 0 | 0 | 39   | 0.65     | 0.072163 | 2.440926 | Unclassified | chr9:24527647-24580746    | 51.1    |
| Bbx           | 0 | 0 | 0 | 1349 | 22.48333 | 2.06558  | 25.1965  | Unclassified | chr16:50191957-50434502   | 240.546 |
| Sifn5         | 0 | 0 | 0 | 160  | 2.666667 | 5.67854  | 4.18267  | Unclassified | chr11:82763603-82778352   | 12.75   |
| Olfr508       | 0 | 0 | 0 | 2    | 0.033333 | 0        | 2        | Unclassified | chr7:115771507-115774440  | 0.934   |
| Nog           | 0 | 0 | 0 | 2    | 0.033333 | 0.333411 | 0.479979 | Unclassified | chr11:89161951-89165873   | 1.923   |
| Nos1          | 0 | 0 | 0 | 133  | 2.216667 | 0.043832 | 1.197434 | Unclassified | chr5:118315127-118403820  | 86.694  |
| Nr4a3         | 0 | 0 | 0 | 72   | 1.2      | 0.591837 | 2.026318 | Unclassified | chr4:48062119-48096224    | 32.106  |
| Olfr1099      | 0 | 0 | 0 | 0    | 0        | 0.027298 | 0        | Unclassified | chr2:86798674-86801613    | 0.94    |
| Olfr1110      | 0 | 0 | 0 | 0    | 0        | 0.013617 | 0        | Unclassified | chr2:86975537-86978476    | 0.94    |
| Olfr259       | 0 | 0 | 0 | 1    | 0.016667 | 0.040914 | 0        | Unclassified | chr2:86947603-86950542    | 0.94    |
| Olfr1176      | 0 | 0 | 0 | 0    | 0        | 0        | 0        | Unclassified | chr2:88177723-88180671    | 0.949   |
| Hepacam       | 0 | 0 | 0 | 19   | 0.316667 | 0.390019 | 0.499541 | Unclassified | chr9:37173190-37194156    | 18.967  |
| Gckr          | 0 | 0 | 0 | 29   | 0.483333 | 0.012727 | 1.634372 | Unclassified | chr5:31597953-31629675    | 29.723  |
| Psd3          | 0 | 0 | 0 | 356  | 5.933333 | 0.386111 | 1.793517 | Unclassified | chr8:70212980-70500473    | 285.494 |
| Nup155        | 0 | 0 | 0 | 825  | 13.75    | 5.13061  | 20.14385 | Unclassified | chr15:8057312-8109859     | 50.548  |
| Pdzd3         | 0 | 0 | 0 | 20   | 0.333333 | 0.117527 | 0.868679 | Unclassified | chr9:44055394-44061547    | 4.154   |
| Acbd3         | 0 | 0 | 0 | 544  | 9.066667 | 8.4723   | 21.96421 | Unclassified | chr1:182654173-182684334  | 28.162  |
| Rfxap         | 0 | 0 | 0 | 174  | 2.9      | 10.2416  | 31.83245 | Stalled      | chr3:54607036-54613713    | 4.678   |
| Ripply3       | 0 | 0 | 0 | 22   | 0.366667 | 1.11436  | 4.550409 | Unclassified | chr16:94548028-94558542   | 8.515   |
| Cdc14a        | 0 | 0 | 0 | 1224 | 20.4     | 3.91142  | 38.28835 | Unclassified | chr3:115975470-116128950  | 151.481 |
| Olfr788       | 0 | 0 | 0 | 0    | 0        | 0        | 0        | Unclassified | chr10:128907749-128910685 | 0.937   |
| Olfr811       | 0 | 0 | 0 | 1    | 0.016667 | 0.045543 | 1        | Unclassified | chr10:129238619-129241579 | 0.961   |
| Olfr806       | 0 | 0 | 0 | 0    | 0        | 0.005597 | 0        | Unclassified | chr10:129175029-129177971 | 0.943   |
| Olfr803       | 0 | 0 | 0 | 1    | 0.016667 | 0.008531 | 1        | Unclassified | chr10:129128168-129131095 | 0.928   |
| Olfr771       | 0 | 0 | 0 | 3    | 0.05     | 0        | 2        | Unclassified | chr10:128597084-128600038 | 0.955   |
| Olfr800       | 0 | 0 | 0 | 1    | 0.016667 | 0.020523 | 0        | Unclassified | chr10:129094863-129097799 | 0.937   |
| Olfr786       | 0 | 0 | 0 | 0    | 0        | 0.013617 | 0        | Unclassified | chr10:128871869-128874808 | 0.94    |
| Olfr810       | 0 | 0 | 0 | 0    | 0        | 0        | 0        | Unclassified | chr10:129227704-129230643 | 0.94    |
| Kif18a        | 0 | 0 | 0 | 416  | 6.933333 | 1.82264  | 24.22017 | Stalled      | chr2:109118894-109181903  | 61.01   |
| Hus1          | 0 | 0 | 0 | 381  | 6.35     | 3.22422  | 14.99757 | Unclassified | chr11:8893144-8913140     | 17.997  |
| Olfr805       | 0 | 0 | 0 | 1    | 0.016667 | 0.058893 | 1        | Unclassified | chr10:129159638-129162598 | 0.961   |
| Olfr798       | 0 | 0 | 0 | 0    | 0        | 0        | 0        | Unclassified | chr10:129062179-129065115 | 0.937   |
| Olfr629       | 0 | 0 | 0 | 2    | 0.033333 | 0.022846 | 0        | Unclassified | chr7:110888714-110891836  | 1.123   |
| Olfr640       | 0 | 0 | 0 | 4    | 0.066667 | 0.08146  | 1        | Unclassified | chr7:111169886-111172830  | 0.945   |
| Rhox2d        | 0 | 0 | 0 | 2    | 0.033333 | 0.003316 | 0.76782  | Unclassified | chrX:34905916-34912222    | 4.307   |
| Olfr1424      | 0 | 0 | 0 | 3    | 0.05     | 0        | 1        | Unclassified | chr19:12133298-12136240   | 0.943   |
| Klhl4         | 0 | 0 | 0 | 13   | 0.216667 | 0.051014 | 0        | Unclassified | chrX:11586128-11674307    | 86.18   |
| Rhox2f        | 0 | 0 | 0 | 0    | 0        | 0.003384 | 0        | Unclassified | chrX:34983927-34990666    | 4.74    |
| Rhox2g        | 0 | 0 | 0 | 0    | 0        | 0.019315 | 0        | Unclassified | chrX:35053618-35059977    | 4.36    |
| Rnf20         | 0 | 0 | 0 | 490  | 8.166667 | 16.913   | 11.15321 | Unclassified | chr4:49642931-49669758    | 24.828  |
| Rhox8         | 0 | 0 | 0 | 2    | 0.033333 | 0        | 0        | Unclassified | chrX:35227952-35234121    | 4.17    |
| Rhox10        | 0 | 0 | 0 | 5    | 0.083333 | 0        | 0        | Unclassified | chrX:35417651-35424865    | 5.215   |
| Irf2bp1       | 0 | 0 | 0 | 159  | 2.65     | 9.50949  | 3.927798 | Unclassified | chr7:19587413-19592112    | 2.7     |
| Rnase12       | 0 | 0 | 0 | 9    | 0.15     | 0.204827 | 8        | Unclassified | chr14:51676457-51678895   | 0.439   |
| H28           | 0 | 0 | 0 | 3    | 0.05     | 0.069224 | 0.759384 | Unclassified | chr3:151421700-151427855  | 4.156   |
| Fat1          | 0 | 0 | 0 | 91   | 1.516667 | 0.034172 | 0        | Unclassified | chr8:46033561-46137611    | 102.051 |
| Ern2          | 0 | 0 | 0 | 149  | 2.483333 | 0.073285 | 0.389639 | Unclassified | chr7:129313406-129331730  | 16.325  |
| Nefl          | 0 | 0 | 0 | 6    | 0.1      | 0.102479 | 1.176107 | Unclassified | chr14:68699940-68705794   | 3.855   |
| Foxh1         | 0 | 0 | 0 | 13   | 0.216667 | 0.042438 | 0.510057 | Unclassified | chr15:76498736-76502303   | 1.568   |
| Rln1          | 0 | 0 | 0 | 4    | 0.066667 | 0.42292  | 0.389872 | Unclassified | chr19:29406244-29411160   | 2.917   |
| Olfr1428      | 0 | 0 | 0 | 0    | 0        | 0.027153 | 0        | Unclassified | chr19:12183090-12186034   | 0.945   |
| Tmem106b      | 0 | 0 | 0 | 248  | 4.133333 | 4.01069  | 24.67989 | Stalled      | chr6:13017758-13039269    | 19.512  |
| Olfr820       | 0 | 0 | 0 | 2    | 0.033333 | 0        | 2        | Unclassified | chr10:129452418-129455357 | 0.94    |
| Frat2         | 0 | 0 | 0 | 53   | 0.883333 | 4.93235  | 25.76748 | Stalled      | chr19:41920464-41924622   | 2.159   |
| 2310028H24Rik | 0 | 0 | 0 | 288  | 4.8      | 3.39044  | 16.62682 | Stalled      | chr4:41465961-41518560    | 50.6    |
| Vamp8         | 0 | 0 | 0 | 194  | 3.233333 | 49.0405  | 6.481681 | Unclassified | chr6:72335214-72342661    | 5.448   |
| Vax1          | 0 | 0 | 0 | 8    | 0.133333 | 0.113419 | 0.288907 | Unclassified | chr19:59240676-59246519   | 3.844   |
| Vbp1          | 0 | 0 | 0 | 188  | 3.133333 | 13.1486  | 20.96915 | Stalled      | chrX:72757635-72780285    | 20.651  |
| Lmbr1l        | 0 | 0 | 0 | 494  | 8.233333 | 10.2604  | 11.20958 | Unclassified | chr15:98734351-98750529   | 14.179  |
| L2hgdh        | 0 | 0 | 0 | 399  | 6.65     | 2.98713  | 76.46972 | Stalled      | chr12:70791422-70827861   | 34.44   |
| Hhati         | 0 | 0 | 0 | 18   | 0.3      | 0.068573 | 0.348595 | Unclassified | chr9:121693134-121703625  | 8.492   |

|                      |   |          |   |      |          |          |          |              |                           |         |
|----------------------|---|----------|---|------|----------|----------|----------|--------------|---------------------------|---------|
| <b>Paqr7</b>         | 0 | 0        | 0 | 50   | 0.833333 | 0.644847 | 9.188855 | Unclassified | chr4:134050892-134064725  | 11.834  |
| <b>Rrp7a</b>         | 0 | 0        | 0 | 654  | 10.9     | 35.3987  | 2.503648 | Elongating   | chr15:82946278-82955231   | 6.954   |
| <b>Olfr1318</b>      | 0 | 0        | 0 | 1    | 0.016667 | 0.013277 | 0        | Unclassified | chr2:111994109-111997072  | 0.964   |
| <b>Lypd3</b>         | 0 | 0        | 0 | 19   | 0.316667 | 0.597501 | 1.219931 | Unclassified | chr7:25419588-25426137    | 4.55    |
| <b>Med24</b>         | 0 | 0        | 0 | 525  | 8.75     | 16.1032  | 2.901775 | Elongating   | chr11:98565904-98592749   | 24.846  |
| <b>Tug1</b>          | 0 | 0        | 0 | 550  | 9.166667 | 3.73896  | 17.45079 | Unclassified | chr11:3539796-3550811     | 9.016   |
| <b>Ceacam18</b>      | 0 | 0        | 0 | 19   | 0.316667 | 0.013233 | 0.949469 | Unclassified | chr7:50888108-50904664    | 14.557  |
| <b>Rab38</b>         | 0 | 0        | 0 | 22   | 0.366667 | 0.227557 | 3.080472 | Unclassified | chr7:95576782-95640082    | 61.301  |
| <b>Spink5</b>        | 0 | 0        | 0 | 25   | 0.416667 | 0.021517 | 1.433832 | Unclassified | chr18:44120894-44182141   | 59.248  |
| <b>E2f8</b>          | 0 | 0        | 0 | 816  | 13.6     | 11.3899  | 7.193232 | Unclassified | chr7:56121799-56138411    | 14.613  |
| <b>Peci</b>          | 0 | 0        | 0 | 188  | 3.133333 | 15.217   | 9.027207 | Unclassified | chr13:35069616-35087996   | 16.381  |
| <b>Slc26a4</b>       | 0 | 0        | 0 | 44   | 0.733333 | 0.218243 | 2.604854 | Unclassified | chr12:32204683-32246834   | 40.152  |
| <b>Pde10a</b>        | 0 | 0        | 0 | 243  | 4.05     | 0.081379 | 0.435892 | Unclassified | chr17:8992609-9179513     | 184.905 |
| <b>Nt5c2</b>         | 0 | 0        | 0 | 1361 | 22.68333 | 7.66968  | 13.30604 | Unclassified | chr19:46961320-47038841   | 75.522  |
| <b>Lymr1</b>         | 0 | 0        | 0 | 241  | 4.016667 | 3.39325  | 27.84351 | Stalled      | chr7:127037805-127060264  | 20.46   |
| <b>St5</b>           | 0 | 0        | 0 | 693  | 11.55    | 0.120745 | 0.355565 | Unclassified | chr7:116667424-116762661  | 93.238  |
| <b>Olfr485</b>       | 0 | 0        | 0 | 1    | 0.016667 | 0.080606 | 1        | Unclassified | chr7:115302431-115305385  | 0.955   |
| <b>Kdm3a</b>         | 0 | 0        | 0 | 515  | 8.583333 | 6.13166  | 31.66607 | Unclassified | chr6:71538965-71584899    | 43.935  |
| <b>Speer4b</b>       | 0 | 0        | 0 | 1    | 0.016667 | 0        | 0        | Unclassified | chr5:27822349-27829932    | 5.584   |
| <b>Ephb1</b>         | 0 | 0        | 0 | 397  | 6.616667 | 0.045148 | 1.570155 | Unclassified | chr9:101824459-102259023  | 432.565 |
| <b>Txndc17</b>       | 0 | 0        | 0 | 212  | 3.533333 | 22.2359  | 23.18945 | Stalled      | chr11:72019055-72023989   | 2.935   |
| <b>Pck2</b>          | 0 | 0        | 0 | 279  | 4.65     | 15.9088  | 8.311073 | Unclassified | chr14:56157102-56168854   | 9.753   |
| <b>Olfr488</b>       | 0 | 0        | 0 | 1    | 0.016667 | 0.027125 | 1        | Unclassified | chr7:115398705-115401650  | 0.946   |
| <b>Hes6</b>          | 0 | 0        | 0 | 329  | 5.483333 | 19.8109  | 13.32209 | Unclassified | chr1:93308059-93311799    | 1.741   |
| <b>Klf9</b>          | 0 | 0        | 0 | 312  | 5.2      | 3.76722  | 14.50789 | Unclassified | chr19:23213715-23241401   | 25.687  |
| <b>Elov17</b>        | 0 | 0        | 0 | 125  | 2.083333 | 0.076636 | 27.88685 | Stalled      | chr13:109002597-109077299 | 72.703  |
| <b>Olfr503</b>       | 0 | 0        | 0 | 1    | 0.016667 | 0.065802 | 1        | Unclassified | chr7:115686040-115689012  | 0.973   |
| <b>Ccr8</b>          | 0 | 0        | 0 | 5    | 0.083333 | 0.043437 | 0.940397 | Unclassified | chr9:119999250-120004024  | 2.775   |
| <b>Olfr723</b>       | 0 | 0        | 0 | 0    | 0        | 0.013748 | 0        | Unclassified | chr14:50548237-50551243   | 1.007   |
| <b>Coq3</b>          | 0 | 0        | 0 | 335  | 5.583333 | 1.94912  | 53.55151 | Stalled      | chr4:21804821-21839273    | 32.453  |
| <b>Olfr1251</b>      | 0 | 0        | 0 | 0    | 0        | 0.022827 | 0        | Unclassified | chr2:89507084-89510041    | 0.958   |
| <b>Olfr456</b>       | 0 | 0        | 0 | 2    | 0.033333 | 0.022071 | 1        | Unclassified | chr6:42436161-42439213    | 1.053   |
| <b>5430413K10Rik</b> | 0 | 0        | 0 | 8    | 0.133333 | 0.031276 | 0.639175 | Unclassified | chr2:154130979-154146378  | 13.4    |
| <b>Olfr329</b>       | 0 | 0        | 0 | 0    | 0        | 0.002807 | 0        | Unclassified | chr11:58356019-58358958   | 0.94    |
| <b>Angptl7</b>       | 0 | 0        | 0 | 47   | 0.783333 | 0        | 1.341714 | Unclassified | chr4:147869388-147876571  | 5.184   |
| <b>Atrx</b>          | 0 | 0        | 0 | 1381 | 23.01667 | 13.0306  | 17.82451 | Unclassified | chrX:102992955-103126711  | 131.757 |
| <b>Sgsm2</b>         | 0 | 0        | 0 | 267  | 4.45     | 1.87376  | 10.11252 | Stalled      | chr11:74662765-74712582   | 47.818  |
| <b>C030030A07Rik</b> | 0 | 111.7637 | 0 | 108  | 1.8      | 0.262322 | 0.929811 | Unclassified | chr6:136778451-136785971  | 5.521   |
| <b>2010305A19Rik</b> | 0 | 0        | 0 | 300  | 5        | 5.90324  | 16.71569 | Unclassified | chr4:107998756-108013323  | 12.568  |
| <b>Fmo9</b>          | 0 | 0        | 0 | 15   | 0.25     | 0.012545 | 0        | Unclassified | chr1:168592185-168613976  | 19.792  |
| <b>2310009B15Rik</b> | 0 | 0        | 0 | 106  | 1.766667 | 8.6839   | 7.080459 | Unclassified | chr1:140748555-140755431  | 4.877   |
| <b>Reps2</b>         | 0 | 0        | 0 | 64   | 1.066667 | 0.119261 | 4.794383 | Unclassified | chrX:158849885-159083533  | 231.649 |
| <b>2010107G23Rik</b> | 0 | 0        | 0 | 13   | 0.216667 | 0.216239 | 2.243919 | Unclassified | chr10:61570403-61575761   | 3.359   |
| <b>Mapk1ip1</b>      | 0 | 0        | 0 | 272  | 4.533333 | 7.60903  | 21.54474 | Stalled      | chr7:146027500-146039950  | 10.451  |
| <b>Lyg1</b>          | 0 | 0        | 0 | 15   | 0.25     | 0        | 0        | Unclassified | chr1:38003582-38016604    | 11.023  |
| <b>Slc16a8</b>       | 0 | 0        | 0 | 53   | 0.883333 | 0.225404 | 0.21989  | Unclassified | chr15:79081445-79087178   | 3.734   |
| <b>2300002M23Rik</b> | 0 | 0        | 0 | 1    | 0.016667 | 0.082156 | 1        | Unclassified | chr17:35702429-35705890   | 1.462   |
| <b>Ube2w</b>         | 0 | 0        | 0 | 959  | 15.98333 | 3.52948  | 20.75875 | Unclassified | chr1:16559486-16611367    | 49.882  |
| <b>Atcay</b>         | 0 | 0        | 0 | 64   | 1.066667 | 0.203157 | 0.910362 | Unclassified | chr10:80667257-80695524   | 26.268  |
| <b>Olfr487</b>       | 0 | 0        | 0 | 0    | 0        | 0.01353  | 0        | Unclassified | chr7:115355096-115358041  | 0.946   |
| <b>Gm5662</b>        | 0 | 0        | 0 | 2    | 0.033333 | 0        | 1        | Unclassified | chr12:89509079-89514941   | 3.863   |
| <b>D11Bwg0517e</b>   | 0 | 0        | 0 | 682  | 11.36667 | 0.16691  | 1.144494 | Unclassified | chr11:118351073-118772886 | 419.814 |
| <b>Zfp804a</b>       | 0 | 0        | 0 | 69   | 1.15     | 0.033703 | 0.751118 | Unclassified | chr2:81891814-82100035    | 206.222 |
| <b>Gbp9</b>          | 0 | 0        | 0 | 223  | 3.716667 | 8.10265  | 4.881283 | Unclassified | chr5:105507412-105541311  | 31.9    |
| <b>Chrna9</b>        | 0 | 0        | 0 | 18   | 0.3      | 0.127971 | 0        | Unclassified | chr5:66356362-66368725    | 10.364  |
| <b>Gm10094</b>       | 0 | 0        | 0 | 235  | 3.916667 | 0        | 8.571637 | Unclassified | chr14:58415054-58421166   | 4.113   |
| <b>Depdc5</b>        | 0 | 0        | 0 | 1153 | 19.21667 | 8.85454  | 27.37639 | Unclassified | chr5:33204369-33336881    | 130.513 |
| <b>Kcnq4</b>         | 0 | 0        | 0 | 111  | 1.85     | 0.581491 | 0.62965  | Unclassified | chr4:120370077-120421781  | 49.705  |
| <b>C430048L16Rik</b> | 0 | 0        | 0 | 121  | 2.016667 | 3.88148  | 14.5319  | Stalled      | chr4:12014516-12023418    | 6.903   |
| <b>Gm12886</b>       | 0 | 0        | 0 | 5    | 0.083333 | 0.027846 | 0        | Unclassified | chr4:121087339-121097704  | 8.366   |
| <b>Gm12887</b>       | 0 | 0        | 0 | 7    | 0.116667 | 0.078944 | 0        | Unclassified | chr4:121286608-121296730  | 8.123   |
| <b>Plcd4</b>         | 0 | 0        | 0 | 106  | 1.766667 | 0.068625 | 0.534048 | Unclassified | chr1:74587462-74612551    | 23.09   |
| <b>Olfr449</b>       | 0 | 0        | 0 | 1    | 0.016667 | 0        | 1        | Unclassified | chr6:42785881-42788817    | 0.937   |
| <b>Gm5409</b>        | 0 | 0        | 0 | 2    | 0.033333 | 0        | 0        | Unclassified | chr6:41363305-41369592    | 4.288   |
| <b>1600015I10Rik</b> | 0 | 0        | 0 | 6    | 0.1      | 0.03097  | 1.165275 | Unclassified | chr6:48877894-48883685    | 3.792   |
| <b>Pot1b</b>         | 0 | 0        | 0 | 169  | 2.816667 | 1.06122  | 32.11893 | Stalled      | chr17:55791322-55853926   | 60.605  |
| <b>Trim15</b>        | 0 | 0        | 0 | 163  | 2.716667 | 0.354657 | 0.388931 | Unclassified | chr17:36997635-37006132   | 6.498   |
| <b>Olfr535</b>       | 0 | 0        | 0 | 1    | 0.016667 | 0        | 1        | Unclassified | chr7:147676538-147679477  | 0.94    |
| <b>Tmem160</b>       | 0 | 0        | 0 | 104  | 1.733333 | 71.9556  | 5.534733 | Unclassified | chr7:17036127-17040839    | 2.713   |
| <b>Tal2</b>          | 0 | 0        | 0 | 13   | 0.216667 | 0.123234 | 1.628771 | Unclassified | chr4:53790576-53799757    | 7.182   |
| <b>Olfr78</b>        | 0 | 0        | 0 | 10   | 0.166667 | 0.039842 | 0        | Unclassified | chr7:109889234-109909985  | 18.752  |
| <b>Plekhhg5</b>      | 0 | 0        | 0 | 58   | 0.966667 | 0.587286 | 0        | Unclassified | chr4:151468827-151489509  | 18.683  |
| <b>Duox2</b>         | 0 | 0        | 0 | 29   | 0.483333 | 0.056273 | 0.783056 | Unclassified | chr2:122106172-122125901  | 17.73   |
| <b>Lrrc52</b>        | 0 | 0        | 0 | 30   | 0.5      | 0        | 0.853674 | Unclassified | chr1:169375805-169398911  | 21.107  |
| <b>Smg7</b>          | 0 | 0        | 0 | 1236 | 20.6     | 9.38458  | 26.1703  | Unclassified | chr1:154684125-154751776  | 65.652  |
| <b>Nox4</b>          | 0 | 0        | 0 | 47   | 0.783333 | 0.058539 | 2.322427 | Unclassified | chr7:94393304-94547116    | 151.813 |
| <b>Wnk2</b>          | 0 | 0        | 0 | 192  | 3.2      | 0.22476  | 2.246373 | Unclassified | chr13:49131670-49245383   | 111.714 |
| <b>Kdm5b</b>         | 0 | 0        | 0 | 271  | 4.516667 | 3.23025  | 30.99574 | Stalled      | chr1:136454754-136529455  | 72.702  |
| <b>Tm4sf5</b>        | 0 | 0        | 0 | 22   | 0.366667 | 0.882522 | 0.41064  | Unclassified | chr11:70316775-70324683   | 5.909   |
| <b>Chmp4b</b>        | 0 | 0        | 0 | 1464 | 24.4     | 107.736  | 5.15857  | Unclassified | chr2:154480761-154520519  | 37.759  |
| <b>AI451617</b>      | 0 | 0        | 0 | 235  | 3.916667 | 5.90423  | 4.043693 | Unclassified | chr7:111618530-111658363  | 37.834  |
| <b>Gipc3</b>         | 0 | 0        | 0 | 59   | 0.983333 | 2.19029  | 3.227601 | Unclassified | chr10:80800506-80808011   | 5.506   |
| <b>Tsen15</b>        | 0 | 0        | 0 | 258  | 4.3      | 5.98827  | 10.92586 | Unclassified | chr1:154217867-154235812  | 15.946  |
| <b>Tigd3</b>         | 0 | 0        | 0 | 160  | 2.666667 | 1.31798  | 6.150128 | Unclassified | chr19:5891137-5896107     | 2.971   |
| <b>Gla</b>           | 0 | 0        | 0 | 370  | 6.166667 | 3.73338  | 5.062797 | Unclassified | chrX:131122707-131137544  | 12.838  |
| <b>Msnl</b>          | 0 | 0        | 0 | 29   | 0.483333 | 0.014631 | 0.658579 | Unclassified | chr17:25870984-25885275   | 12.292  |



|               |   |   |   |      |          |          |          |              |                           |         |
|---------------|---|---|---|------|----------|----------|----------|--------------|---------------------------|---------|
| Prss34        | 0 | 0 | 0 | 5    | 0.083333 | 0.063238 | 0.555435 | Unclassified | chr17:25433338-25437106   | 1.769   |
| No17          | 0 | 0 | 0 | 472  | 7.866667 | 33.3816  | 9.10225  | Unclassified | chr13:43491744-43498227   | 4.484   |
| Angpt2        | 0 | 0 | 0 | 514  | 8.566667 | 0        | 1.19097  | Unclassified | chr8:18691336-18743551    | 50.216  |
| Angpt1        | 0 | 0 | 0 | 114  | 1.9      | 2.28855  | 4.921988 | Unclassified | chr15:42256270-42510341   | 252.072 |
| Agrrn         | 0 | 0 | 0 | 90   | 1.5      | 1.68358  | 0.97303  | Unclassified | chr4:155539398-155561244  | 19.847  |
| Nhlh2         | 0 | 0 | 0 | 3    | 0.05     | 0.045868 | 0        | Unclassified | chr3:101812067-101819415  | 5.349   |
| Zdhhc25       | 0 | 0 | 0 | 1    | 0.016667 | 0.051637 | 0        | Unclassified | chr15:88428731-88431972   | 1.242   |
| Gm749         | 0 | 0 | 0 | 5    | 0.083333 | 0        | 0        | Unclassified | chr17:28684431-28689563   | 3.133   |
| Tmhs          | 0 | 0 | 0 | 38   | 0.633333 | 0.154166 | 0.57498  | Unclassified | chr17:28710663-28720538   | 7.876   |
| Agtr2         | 0 | 0 | 0 | 2    | 0.033333 | 0.017875 | 1        | Unclassified | chrX:21059751-21065957    | 4.207   |
| Agtr1b        | 0 | 0 | 0 | 18   | 0.3      | 0        | 0.752569 | Unclassified | chr3:20213394-20268099    | 52.706  |
| Klri2         | 0 | 0 | 0 | 11   | 0.183333 | 0.018067 | 0.537156 | Unclassified | chr6:129679058-129692502  | 11.445  |
| Gldn          | 0 | 0 | 0 | 58   | 0.966667 | 0.066163 | 1.504058 | Unclassified | chr9:54132292-54189584    | 55.293  |
| Treh          | 0 | 0 | 0 | 33   | 0.55     | 0        | 1.953383 | Unclassified | chr9:44479320-44494387    | 13.068  |
| Tssk3         | 0 | 0 | 0 | 49   | 0.816667 | 0.02479  | 0.385499 | Unclassified | chr4:129166251-129170014  | 1.764   |
| Srgap1        | 0 | 0 | 0 | 294  | 4.9      | 0.105113 | 0.96301  | Unclassified | chr10:121222297-121486249 | 261.953 |
| Daglb         | 0 | 0 | 0 | 681  | 11.35    | 3.79871  | 22.10042 | Unclassified | chr5:144223360-144265310  | 39.951  |
| Adamdec1      | 0 | 0 | 0 | 10   | 0.166667 | 0.026568 | 1.377117 | Unclassified | chr14:69181443-69202129   | 18.687  |
| Cysltr1       | 0 | 0 | 0 | 6    | 0.1      | 0.102382 | 0        | Unclassified | chrX:103771855-103800801  | 26.947  |
| Ms4a2         | 0 | 0 | 0 | 6    | 0.1      | 0        | 0.576809 | Unclassified | chr19:11691682-11700133   | 6.452   |
| Fcer1a        | 0 | 0 | 0 | 2    | 0.033333 | 0        | 0        | Unclassified | chr1:175151402-175159360  | 5.959   |
| Fbp2          | 0 | 0 | 0 | 37   | 0.616667 | 0.08914  | 0        | Unclassified | chr13:62938244-62961730   | 21.487  |
| Ehd2          | 0 | 0 | 0 | 708  | 11.8     | 60.0939  | 5.101228 | Unclassified | chr4:141414056-141432835  | 16.78   |
| Hdac1         | 0 | 0 | 0 | 918  | 15.3     | 33.0417  | 6.109123 | Unclassified | chr4:129193347-129221890  | 26.544  |
| Mospd1        | 0 | 0 | 0 | 179  | 2.983333 | 1.51295  | 44.31896 | Stalled      | chrX:50698197-50725669    | 25.473  |
| Kctd2         | 0 | 0 | 0 | 377  | 6.283333 | 9.2992   | 20.27262 | Unclassified | chr11:115279439-115292587 | 11.149  |
| Slco6b1       | 0 | 0 | 0 | 28   | 0.466667 | 0.056961 | 0        | Unclassified | chr1:98802752-98896137    | 91.386  |
| Pla2g3        | 0 | 0 | 0 | 15   | 0.25     | 0.048861 | 0        | Unclassified | chr11:3386229-3394169     | 5.941   |
| Olfr469       | 0 | 0 | 0 | 1    | 0.016667 | 0.043412 | 1        | Unclassified | chr7:114966036-114968981  | 0.946   |
| Rpp25         | 0 | 0 | 0 | 14   | 0.233333 | 0.990266 | 11       | Unclassified | chr9:57349908-57353254    | 1.347   |
| Bbox1         | 0 | 0 | 0 | 22   | 0.366667 | 0.015745 | 0.653717 | Unclassified | chr2:110105239-110147882  | 40.644  |
| Cmpk1         | 0 | 0 | 0 | 455  | 7.583333 | 20.2429  | 51.72737 | Stalled      | chr4:114633217-114661833  | 26.617  |
| Pdx1          | 0 | 0 | 0 | 8    | 0.133333 | 0.229041 | 0.401198 | Unclassified | chr5:148079706-148086725  | 5.02    |
| 1700102P08Rik | 0 | 0 | 0 | 80   | 1.333333 | 0.245568 | 3.547623 | Unclassified | chr9:108293164-108300096  | 4.933   |
| C030039L03Rik | 0 | 0 | 0 | 292  | 4.866667 | 0.767104 | 14.83137 | Unclassified | chr7:28457679-28491501    | 31.823  |
| G6pdx         | 0 | 0 | 0 | 487  | 8.116667 | 10.4768  | 29.68876 | Unclassified | chrX:71654824-71676500    | 19.677  |
| G6pd2         | 0 | 0 | 0 | 2    | 0.033333 | 2.8548   | 2        | Unclassified | chr5:62198081-62201716    | 1.636   |
| Pdpk1         | 0 | 0 | 0 | 711  | 11.85    | 4.96652  | 30.86737 | Unclassified | chr17:24210646-24280556   | 67.911  |
| Enpp1         | 0 | 0 | 0 | 394  | 6.566667 | 3.82334  | 25.46406 | Stalled      | chr10:24361216-24433908   | 70.693  |
| Tmem181b      | 0 | 0 | 0 | 89   | 1.483333 | 1.56633  | 9.690709 | Unclassified | chr17:6439625-6478275     | 36.651  |
| Zfp106        | 0 | 0 | 0 | 832  | 13.86667 | 17.6736  | 14.72905 | Unclassified | chr2:120332565-120391567  | 57.003  |
| Sh2d1a        | 0 | 0 | 0 | 9    | 0.15     | 0        | 1.509584 | Unclassified | chrX:39853784-39875252    | 19.469  |
| Defb5         | 0 | 0 | 0 | 1    | 0.016667 | 0        | 0        | Unclassified | chr8:19245591-19250828    | 3.238   |
| Sh3gl2        | 0 | 0 | 0 | 124  | 2.066667 | 0.031972 | 1.199803 | Unclassified | chr4:84849359-85035283    | 183.925 |
| Ostf1         | 0 | 0 | 0 | 722  | 12.03333 | 29.5864  | 20.54368 | Unclassified | chr19:18654853-18708303   | 51.451  |
| Olfr291       | 0 | 0 | 0 | 2    | 0.033333 | 0.026805 | 0        | Unclassified | chr7:92002874-92005828    | 0.955   |
| Depdc7        | 0 | 0 | 0 | 69   | 1.15     | 0.335116 | 5.077474 | Unclassified | chr2:104561943-104584958  | 21.016  |
| Prl3a1        | 0 | 0 | 0 | 7    | 0.116667 | 0        | 0.76385  | Unclassified | chr13:27349357-27368529   | 17.173  |
| Olfr290       | 0 | 0 | 0 | 0    | 0        | 0.040537 | 0        | Unclassified | chr7:92062290-92065237    | 0.948   |
| Potr3k        | 0 | 0 | 0 | 325  | 5.416667 | 0        | 44.89509 | Stalled      | chr2:181597064-181605531  | 6.468   |
| Olfr888       | 0 | 0 | 0 | 0    | 0        | 0.016352 | 0        | Unclassified | chr9:37914272-37917217    | 0.946   |
| 1600012F09Rik | 0 | 0 | 0 | 212  | 3.533333 | 3.99562  | 27.51075 | Stalled      | chr13:18078474-18087185   | 6.712   |
| Ttc23         | 0 | 0 | 0 | 133  | 2.216667 | 0.345178 | 0.76199  | Unclassified | chr7:74790295-74871462    | 79.168  |
| Col28a1       | 0 | 0 | 0 | 107  | 1.783333 | 0.027269 | 0        | Unclassified | chr6:7947807-8144617      | 194.811 |
| V1rel3        | 0 | 0 | 0 | 0    | 0        | 0        | 0        | Unclassified | chr7:11332850-11336887    | 2.038   |
| V1rh17        | 0 | 0 | 0 | 0    | 0        | 0.068997 | 0        | Unclassified | chr13:22177746-22180673   | 0.928   |
| Thsd7b        | 0 | 0 | 0 | 416  | 6.933333 | 0.022553 | 2.789645 | Unclassified | chr1:131167880-132115853  | 945.974 |
| AY358078      | 0 | 0 | 0 | 11   | 0.183333 | 0.428698 | 0        | Unclassified | chr14:52417720-52446034   | 26.315  |
| 4930506M07Rik | 0 | 0 | 0 | 105  | 1.75     | 0.19945  | 2.016985 | Unclassified | chr19:59047847-59152559   | 102.713 |
| Olfr887       | 0 | 0 | 0 | 0    | 0        | 0.041343 | 0        | Unclassified | chr9:37890422-37893352    | 0.931   |
| Cyct          | 0 | 0 | 0 | 6    | 0.1      | 0.058971 | 0.524127 | Unclassified | chr2:76191999-76200505    | 6.507   |
| 1700010D01Rik | 0 | 0 | 0 | 1    | 0.016667 | 0.038496 | 1        | Unclassified | chrX:92927928-92930600    | 0.673   |
| 1700012A03Rik | 0 | 0 | 0 | 8    | 0.133333 | 0        | 0.521498 | Unclassified | chr6:31998287-32008915    | 8.629   |
| Ccdc46        | 0 | 0 | 0 | 243  | 4.05     | 0.087684 | 4.535619 | Unclassified | chr11:108284579-108721929 | 435.351 |
| Hspe1         | 0 | 0 | 0 | 591  | 9.85     | 115.748  | 27.28333 | Unclassified | chr1:55142991-55148161    | 3.171   |
| Phkg2         | 0 | 0 | 0 | 468  | 7.8      | 26.5049  | 9.448387 | Unclassified | chr7:134714861-134726821  | 9.961   |
| Ankrd36       | 0 | 0 | 0 | 117  | 1.95     | 0.079906 | 1.543279 | Unclassified | chr11:5467686-5589340     | 119.655 |
| Sppl3         | 0 | 0 | 0 | 1710 | 28.5     | 6.47857  | 10.26677 | Unclassified | chr5:115459532-115548799  | 87.268  |
| Taar8c        | 0 | 0 | 0 | 0    | 0        | 0.027837 | 0        | Unclassified | chr10:23820649-23823757   | 1.109   |
| 4921511H03Rik | 0 | 0 | 0 | 2    | 0.033333 | 0        | 0        | Unclassified | chr5:7302163-7311491      | 7.329   |
| Csf1          | 0 | 0 | 0 | 880  | 14.66667 | 17.6086  | 4.498371 | Unclassified | chr3:107543965-107565387  | 19.423  |
| Crygs         | 0 | 0 | 0 | 15   | 0.25     | 0.054693 | 1.857908 | Unclassified | chr16:22805276-22813479   | 6.204   |
| Crym          | 0 | 0 | 0 | 15   | 0.25     | 0        | 0        | Unclassified | chr7:127329897-127347502  | 15.606  |
| Krt12         | 0 | 0 | 0 | 9    | 0.15     | 0.04839  | 0        | Unclassified | chr11:99276977-99285573   | 6.597   |
| Krt9          | 0 | 0 | 0 | 12   | 0.2      | 0.043956 | 0.811911 | Unclassified | chr11:100048094-100056560 | 6.467   |
| Sema5a        | 0 | 0 | 0 | 352  | 5.866667 | 0.032246 | 8.039744 | Unclassified | chr15:32172567-32626096   | 451.53  |
| Sema4f        | 0 | 0 | 0 | 101  | 1.683333 | 0.37154  | 0.874669 | Unclassified | chr6:82861878-82891744    | 27.867  |
| 4933401F05Rik | 0 | 0 | 0 | 13   | 0.216667 | 0.050508 | 0.427153 | Unclassified | chr14:64694279-64706226   | 9.948   |
| 4930420K17Rik | 0 | 0 | 0 | 1303 | 21.71667 | 28.6024  | 4.597054 | Unclassified | chr5:9098736-9118983      | 18.248  |
| Qrs1          | 0 | 0 | 0 | 494  | 8.233333 | 4.81281  | 20.98327 | Unclassified | chr10:43593995-43623542   | 27.548  |
| Snx7          | 0 | 0 | 0 | 62   | 1.033333 | 0.116653 | 2.40468  | Unclassified | chr3:117484795-117573712  | 86.918  |
| Grsf1         | 0 | 0 | 0 | 370  | 6.166667 | 13.3301  | 10.3236  | Unclassified | chr5:89088261-89107196    | 16.936  |
| D4Ert22e      | 0 | 0 | 0 | 1329 | 22.15    | 46.2243  | 6.167331 | Unclassified | chr4:140668929-140697711  | 26.783  |
| Usp13         | 0 | 0 | 0 | 99   | 1.65     | 0.0588   | 1.097036 | Unclassified | chr3:32714547-32834179    | 117.633 |
| Car10         | 0 | 0 | 0 | 339  | 5.65     | 0.057325 | 0        | Unclassified | chr11:92958603-93463063   | 502.461 |
| Nova2         | 0 | 0 | 0 | 59   | 0.983333 | 0.947455 | 3.630405 | Unclassified | chr7:19508697-19544149    | 33.453  |

|               |   |   |   |      |          |          |          |              |                           |         |
|---------------|---|---|---|------|----------|----------|----------|--------------|---------------------------|---------|
| Zic1          | 0 | 0 | 0 | 15   | 0.25     | 0.202766 | 0.864907 | Unclassified | chr9:91255182-91262637    | 5.456   |
| Hs3st3a1      | 0 | 0 | 0 | 55   | 0.916667 | 0.062187 | 1.240171 | Unclassified | chr11:64246833-64336337   | 87.505  |
| Hrsp12        | 0 | 0 | 0 | 203  | 3.383333 | 10.4765  | 70.9407  | Stalled      | chr15:34413776-34427001   | 11.226  |
| Ppp2r1b       | 0 | 0 | 0 | 925  | 15.41667 | 9.26257  | 9.555459 | Unclassified | chr9:50663039-50702334    | 37.296  |
| Tmem218       | 0 | 0 | 0 | 102  | 1.7      | 2.93952  | 21.50957 | Stalled      | chr9:37013917-37030796    | 14.88   |
| Rtn4r1l       | 0 | 0 | 0 | 153  | 2.55     | 0.360314 | 1.349041 | Unclassified | chr11:75005494-75081264   | 73.771  |
| Gapvd1        | 0 | 0 | 0 | 885  | 14.75    | 11.4756  | 2.703998 | Elongating   | chr2:34532501-34612752    | 78.252  |
| Gm4931        | 0 | 0 | 0 | 4    | 0.066667 | 0.030177 | 0.625795 | Unclassified | chr12:105550779-105558795 | 6.017   |
| Pcca          | 0 | 0 | 0 | 1249 | 20.81667 | 6.3949   | 31.9821  | Stalled      | chr14:122931549-123289166 | 355.618 |
| Serpina3f     | 0 | 0 | 0 | 85   | 1.416667 | 0        | 2.217023 | Elongating   | chr12:105450842-105459337 | 6.496   |
| Magi1         | 0 | 0 | 0 | 466  | 7.766667 | 0.214474 | 2.28054  | Unclassified | chr6:93625448-94235898    | 608.451 |
| Shox2         | 0 | 0 | 0 | 20   | 0.333333 | 1.32005  | 0.365977 | Unclassified | chr3:66777190-66787693    | 8.504   |
| Ddb2          | 0 | 0 | 0 | 392  | 6.533333 | 7.84921  | 30.89552 | Unclassified | chr2:91052012-91079135    | 25.124  |
| Cxcl16        | 0 | 0 | 0 | 78   | 1.3      | 1.58504  | 0.681271 | Unclassified | chr11:70267735-70275486   | 5.752   |
| Olfr1355      | 0 | 0 | 0 | 3    | 0.05     | 0        | 0.640223 | Unclassified | chr10:78336293-78342851   | 4.559   |
| Fam129a       | 0 | 0 | 0 | 765  | 12.75    | 10.9077  | 25.81297 | Stalled      | chr1:153416502-153566476  | 147.975 |
| Gm8580        | 0 | 0 | 0 | 2    | 0.033333 | 0        | 1        | Unclassified | chr10:93127988-93130599   | 0.612   |
| 2610528J11Rik | 0 | 0 | 0 | 8    | 0.133333 | 0        | 0.786408 | Unclassified | chr4:118197879-118202822  | 2.944   |
| Llg12         | 0 | 0 | 0 | 327  | 5.45     | 2.67359  | 18.78429 | Unclassified | chr11:115683371-115717094 | 31.724  |
| Gm5627        | 0 | 0 | 0 | 17   | 0.283333 | 0.082597 | 1.601818 | Unclassified | chr9:102639977-102659015  | 17.039  |
| Snw1          | 0 | 0 | 0 | 613  | 10.21667 | 0        | 8.274756 | Unclassified | chr12:88790859-88815249   | 22.391  |
| 1700017N19Rik | 0 | 0 | 0 | 16   | 0.266667 | 0.015167 | 0.625066 | Unclassified | chr10:100053019-100081025 | 26.007  |
| Pla2g12a      | 0 | 0 | 0 | 218  | 3.633333 | 17.371   | 9.425036 | Unclassified | chr3:129579539-129598739  | 17.201  |
| Tmidg1        | 0 | 0 | 0 | 11   | 0.183333 | 0        | 0        | Unclassified | chr11:76716046-76730088   | 12.043  |
| LOC664987     | 0 | 0 | 0 | 0    | 0        | 0        | 0        | Unclassified | chr2:174887049-174895264  | 6.216   |
| Defb12        | 0 | 0 | 0 | 3    | 0.05     | 0.05142  | 1        | Unclassified | chr8:19111930-19116833    | 2.904   |
| Cnpy4         | 0 | 0 | 0 | 219  | 3.65     | 13.4404  | 21.7753  | Stalled      | chr5:138626762-138635122  | 6.361   |
| Dytn          | 0 | 0 | 0 | 50   | 0.833333 | 0.026404 | 0        | Unclassified | chr1:63669424-63735501    | 64.078  |
| Gpr1          | 0 | 0 | 0 | 54   | 0.9      | 0.063962 | 1.181044 | Unclassified | chr1:63229267-63262783    | 31.517  |
| Olfr1206      | 0 | 0 | 0 | 0    | 0        | 0.03748  | 0        | Unclassified | chr2:88702763-88705687    | 0.925   |
| Tppp3         | 0 | 0 | 0 | 22   | 0.366667 | 0.338261 | 1.103886 | Unclassified | chr8:107991392-107997322  | 3.931   |
| Tmem233       | 0 | 0 | 0 | 43   | 0.716667 | 0.036723 | 0.49828  | Unclassified | chr5:116490544-116535255  | 42.712  |
| Olfr1201      | 0 | 0 | 0 | 0    | 0        | 0.05135  | 0        | Unclassified | chr2:88632540-88635464    | 0.925   |
| Zcchc3        | 0 | 0 | 0 | 252  | 4.2      | 5.7129   | 10.36603 | Unclassified | chr2:152237691-152242780  | 3.09    |
| Cryga         | 0 | 0 | 0 | 4    | 0.066667 | 0        | 1        | Unclassified | chr1:65146962-65151937    | 2.976   |
| Zfp169        | 0 | 0 | 0 | 414  | 6.9      | 1.47288  | 14.76475 | Unclassified | chr13:48583030-48610805   | 25.776  |
| 1600012H06Rik | 0 | 0 | 0 | 330  | 5.5      | 8.85068  | 13.03389 | Unclassified | chr17:15078188-15082944   | 2.757   |
| Aurkb         | 0 | 0 | 0 | 419  | 6.983333 | 42.4473  | 7.850524 | Unclassified | chr11:68857144-68865164   | 6.021   |
| Olfr1216      | 0 | 0 | 0 | 0    | 0        | 0        | 0        | Unclassified | chr2:88853283-88856219    | 0.937   |
| Magi3         | 0 | 0 | 0 | 553  | 9.216667 | 1.36596  | 40.0366  | Stalled      | chr3:103817196-104026329  | 207.134 |
| Ptk6          | 0 | 0 | 0 | 20   | 0.333333 | 0.100916 | 0.563401 | Unclassified | chr2:180929828-180939494  | 7.667   |
| 2810432L12Rik | 0 | 0 | 0 | 9    | 0.15     | 0.158969 | 2.019928 | Unclassified | chr4:49597377-49612742    | 13.366  |
| Hpca          | 0 | 0 | 0 | 27   | 0.45     | 0.160231 | 0.854945 | Unclassified | chr4:128788818-128800984  | 10.167  |
| Glt1d1        | 0 | 0 | 0 | 114  | 1.9      | 0.18908  | 4.769707 | Unclassified | chr5:128110631-128187890  | 75.26   |
| 3110047P20Rik | 0 | 0 | 0 | 138  | 2.3      | 0.072086 | 0        | Unclassified | chr5:64038341-64201780    | 161.44  |
| 9630033F20Rik | 0 | 0 | 0 | 428  | 7.133333 | 4.29338  | 28.79558 | Unclassified | chr6:127035139-127061554  | 24.416  |
| C730048C13Rik | 0 | 0 | 0 | 18   | 0.3      | 0.074646 | 0        | Unclassified | chr19:8410112-8481595     | 69.484  |
| Nwd1          | 0 | 0 | 0 | 116  | 1.933333 | 0.03349  | 0.372334 | Unclassified | chr8:75168612-75238643    | 68.032  |
| Wdr26         | 0 | 0 | 0 | 1718 | 28.63333 | 31.2758  | 9.976931 | Unclassified | chr1:183103358-183144109  | 38.752  |
| Dupd1         | 0 | 0 | 0 | 76   | 1.266667 | 0.034859 | 0.333369 | Unclassified | chr14:22495793-22535798   | 38.006  |
| Emr1          | 0 | 0 | 0 | 74   | 1.233333 | 0.537031 | 0.6422   | Unclassified | chr17:57496108-57622952   | 124.845 |
| Rfwd2         | 0 | 0 | 0 | 875  | 14.58333 | 2.88655  | 54.72234 | Stalled      | chr1:161160456-161277711  | 115.256 |
| Cicn7         | 0 | 0 | 0 | 380  | 6.333333 | 5.6519   | 9.337143 | Unclassified | chr17:25268338-25299044   | 28.707  |
| Cetn2         | 0 | 0 | 0 | 115  | 1.916667 | 12.2697  | 34.01883 | Stalled      | chrX:70158903-70165683    | 4.781   |
| Olfr1331      | 0 | 0 | 0 | 1    | 0.016667 | 0.026897 | 1        | Unclassified | chr4:118539387-118542340  | 0.954   |
| Olfr169       | 0 | 0 | 0 | 0    | 0        | 0.008395 | 0        | Unclassified | chr16:19566032-19568974   | 0.943   |
| Olfr605       | 0 | 0 | 0 | 2    | 0.033333 | 0        | 0        | Unclassified | chr7:110590654-110593664  | 1.011   |
| Olfr1425      | 0 | 0 | 0 | 0    | 0        | 0.095654 | 0        | Unclassified | chr19:12148184-12151120   | 0.937   |
| Olfr1029      | 0 | 0 | 0 | 0    | 0        | 0.015817 | 0        | Unclassified | chr2:85813369-85816429    | 1.061   |
| Olfr412       | 0 | 0 | 0 | 2    | 0.033333 | 0.040947 | 1        | Unclassified | chr11:74176172-74179111   | 0.94    |
| Olfr1505      | 0 | 0 | 0 | 0    | 0        | 0.016217 | 0        | Unclassified | chr19:13991511-13994462   | 0.952   |
| Olfr792       | 0 | 0 | 0 | 0    | 0        | 0.020523 | 0        | Unclassified | chr10:128975594-128978530 | 0.937   |
| Cd1631l       | 0 | 0 | 0 | 18   | 0.3      | 0.022263 | 0.426112 | Unclassified | chr7:147402165-147417044  | 12.88   |
| Colec10       | 0 | 0 | 0 | 21   | 0.35     | 0.008382 | 0.752018 | Unclassified | chr15:54240328-54297913   | 55.586  |
| Cyth3         | 0 | 0 | 0 | 385  | 6.416667 | 1.8159   | 15.82979 | Stalled      | chr5:144381315-144471114  | 87.8    |
| Cyth2         | 0 | 0 | 0 | 381  | 6.35     | 8.60475  | 6.055964 | Unclassified | chr7:53062006-53071686    | 7.681   |
| Npepps        | 0 | 0 | 0 | 429  | 7.15     | 10.2354  | 18.20642 | Stalled      | chr11:97067170-97143890   | 74.721  |
| Zfp120        | 0 | 0 | 0 | 238  | 3.966667 | 1.39344  | 18.10827 | Stalled      | chr2:149940142-149964414  | 22.273  |
| Prtn3         | 0 | 0 | 0 | 20   | 0.333333 | 0.396381 | 0.4296   | Unclassified | chr10:79340411-79345917   | 3.507   |
| Dixdc1        | 0 | 0 | 0 | 107  | 1.783333 | 0.174921 | 1.564406 | Unclassified | chr9:50470859-50538089    | 65.231  |
| Gm11937       | 0 | 0 | 0 | 0    | 0        | 0        | 0        | Unclassified | chr11:99471107-99473503   | 0.397   |
| D430041D05Rik | 0 | 0 | 0 | 317  | 5.283333 | 0.058245 | 0        | Unclassified | chr2:103983231-104252491  | 267.261 |
| Cst1l         | 0 | 0 | 0 | 9    | 0.15     | 0.042021 | 0.364734 | Unclassified | chr2:148574096-148581114  | 5.019   |
| Rrres2        | 0 | 0 | 0 | 16   | 0.266667 | 0.039026 | 0.15215  | Unclassified | chr6:48519696-48524669    | 2.974   |
| Usp9y         | 0 | 0 | 0 | 22   | 0.366667 | 0.009497 | 0.883864 | Unclassified | chrY:635403-798225        | 160.823 |
| Cth           | 0 | 0 | 0 | 216  | 3.6      | 4.53239  | 36.71741 | Stalled      | chr3:157557211-157590027  | 30.817  |
| Krt7          | 0 | 0 | 0 | 36   | 0.6      | 0.016172 | 2.03811  | Unclassified | chr15:101240833-101258236 | 15.404  |
| 4930444G20Rik | 0 | 0 | 0 | 0    | 0        | 0.008715 | 0        | Unclassified | chr10:21786112-21789885   | 1.774   |
| Scaper        | 0 | 0 | 0 | 672  | 11.2     | 0.935683 | 85.52843 | Stalled      | chr9:55397689-55787922    | 388.234 |
| Kcnh6         | 0 | 0 | 0 | 189  | 3.15     | 0.608567 | 0.975675 | Unclassified | chr11:105867516-105895378 | 25.863  |
| Selm          | 0 | 0 | 0 | 26   | 0.433333 | 10.6403  | 3.43521  | Unclassified | chr11:3412704-3417354     | 2.651   |
| Rya3          | 0 | 0 | 0 | 28   | 0.466667 | 0.077419 | 0        | Unclassified | chr2:153741965-153758732  | 14.768  |
| Olfr344       | 0 | 0 | 0 | 0    | 0        | 0.006874 | 0        | Unclassified | chr2:36422119-36425049    | 0.931   |
| Arl8a         | 0 | 0 | 0 | 359  | 5.983333 | 16.0961  | 11.25379 | Unclassified | chr1:137041410-137052845  | 9.436   |
| Gm13119       | 0 | 0 | 0 | 0    | 0        | 0.014915 | 0        | Unclassified | chr4:143945866-143954322  | 6.457   |
| Npffr2        | 0 | 0 | 0 | 32   | 0.533333 | 0.046803 | 1.296707 | Unclassified | chr5:89954453-90012765    | 56.313  |

|               |   |   |   |      |          |          |          |              |                           |         |
|---------------|---|---|---|------|----------|----------|----------|--------------|---------------------------|---------|
| Clec5a        | 0 | 0 | 0 | 11   | 0.183333 | 0.054756 | 0        | Unclassified | chr6:40524896-40537804    | 10.909  |
| Cdc42ep1      | 0 | 0 | 0 | 27   | 0.45     | 0.040335 | 0.232172 | Unclassified | chr15:78671076-78681332   | 8.257   |
| Rexo2         | 0 | 0 | 0 | 366  | 6.1      | 61.1176  | 12.75596 | Unclassified | chr9:48276618-48290716    | 12.099  |
| Azgp1         | 0 | 0 | 0 | 11   | 0.183333 | 0.039015 | 0.461497 | Unclassified | chr5:138420748-138431460  | 8.713   |
| Pfh13         | 0 | 0 | 0 | 143  | 2.383333 | 2.81461  | 9.557979 | Unclassified | chr4:151363739-151372288  | 6.55    |
| Lce1b         | 0 | 0 | 0 | 1    | 0.016667 | 0.019762 | 0        | Unclassified | chr3:92459571-92462848    | 1.278   |
| Oifr350       | 0 | 0 | 0 | 2    | 0.033333 | 0        | 1        | Unclassified | chr2:36703567-36706506    | 0.94    |
| Eri3          | 0 | 0 | 0 | 953  | 15.88333 | 12.9925  | 11.47456 | Unclassified | chr4:117221098-117346886  | 123.789 |
| Chst8         | 0 | 0 | 0 | 184  | 3.066667 | 0.106788 | 0.85981  | Unclassified | chr7:35459486-35599730    | 138.245 |
| Cyp39a1       | 0 | 0 | 0 | 100  | 1.666667 | 1.49424  | 4.318136 | Unclassified | chr17:43802373-43888380   | 84.008  |
| Gm5887        | 0 | 0 | 0 | 39   | 0.65     | 0.194014 | 0.233586 | Unclassified | chr6:147023583-147037554  | 11.972  |
| Pigs          | 0 | 0 | 0 | 307  | 5.116667 | 16.5314  | 15.093   | Unclassified | chr11:78139923-78156278   | 14.356  |
| Aurkc         | 0 | 0 | 0 | 0    | 0        | 0.079646 | 0        | Unclassified | chr7:6946095-6955802      | 7.708   |
| Zfp760        | 0 | 0 | 0 | 103  | 1.716667 | 1.6211   | 10.87836 | Stalled      | chr17:21842707-21862603   | 17.897  |
| Tbc1d19       | 0 | 0 | 0 | 229  | 3.816667 | 2.65047  | 10.38998 | Stalled      | chr5:54198865-54295619    | 94.755  |
| Dmgdh         | 0 | 0 | 0 | 83   | 1.383333 | 0.047325 | 2.005039 | Unclassified | chr13:94442390-94522778   | 78.389  |
| 2310057J18Rik | 0 | 0 | 0 | 7    | 0.116667 | 0        | 0        | Unclassified | chr10:28692093-28708112   | 14.02   |
| Rnf34         | 0 | 0 | 0 | 810  | 13.5     | 14.6296  | 18.74453 | Unclassified | chr5:123298196-123318954  | 18.759  |
| Krt80         | 0 | 0 | 0 | 40   | 0.666667 | 0.093718 | 1.056016 | Unclassified | chr15:101180001-101202556 | 20.556  |
| Slc39a12      | 0 | 0 | 0 | 58   | 0.966667 | 0.038315 | 1.972481 | Unclassified | chr2:14308024-14416604    | 106.581 |
| Mettl13       | 0 | 0 | 0 | 388  | 6.466667 | 7.34425  | 17.60405 | Unclassified | chr1:164463802-164480476  | 14.675  |
| Ubxn10        | 0 | 0 | 0 | 20   | 0.333333 | 0.026299 | 1.938399 | Unclassified | chr4:138274440-138283166  | 6.727   |
| Tas2r115      | 0 | 0 | 0 | 1    | 0.016667 | 0.04121  | 1        | Unclassified | chr6:132687071-132690004  | 0.934   |
| Scel          | 0 | 0 | 0 | 74   | 1.233333 | 0.083842 | 1.157929 | Unclassified | chr14:103910557-104012563 | 100.007 |
| Cd8a          | 0 | 0 | 0 | 11   | 0.183333 | 0.200458 | 0.612703 | Unclassified | chr6:71321420-71329165    | 5.746   |
| Maml2         | 0 | 0 | 0 | 418  | 6.966667 | 0.574462 | 0.706184 | Unclassified | chr9:13422432-13513977    | 89.546  |
| Enah          | 0 | 0 | 0 | 133  | 2.216667 | 1.45475  | 0.468383 | Unclassified | chr1:183834575-183952111  | 115.537 |
| Gprc5b        | 0 | 0 | 0 | 40   | 0.666667 | 0        | 2.599703 | Unclassified | chr7:126115554-126140725  | 23.172  |
| Ptges         | 0 | 0 | 0 | 41   | 0.683333 | 0.639556 | 1.072783 | Unclassified | chr2:30744991-30760817    | 13.827  |
| Stk32b        | 0 | 0 | 0 | 222  | 3.7      | 0.049214 | 2.224347 | Unclassified | chr5:37838064-38110392    | 270.329 |
| Foxb1         | 0 | 0 | 0 | 14   | 0.233333 | 0.261996 | 0.794872 | Unclassified | chr9:69605516-69610747    | 3.232   |
| Osbpl1a       | 0 | 0 | 0 | 309  | 5.15     | 0.390116 | 15.4015  | Stalled      | chr18:12914536-13102229   | 185.694 |
| Polr2g        | 0 | 0 | 0 | 210  | 3.5      | 31.3842  | 9.900978 | Unclassified | chr19:8867618-8875047     | 5.43    |
| Myliip        | 0 | 0 | 0 | 700  | 11.66667 | 7.62907  | 13.88825 | Unclassified | chr13:45483110-45507309   | 22.2    |
| Vwa5b2        | 0 | 0 | 0 | 137  | 2.283333 | 0.301231 | 0.308706 | Unclassified | chr16:20587654-20605450   | 15.797  |
| Hbegf         | 0 | 0 | 0 | 90   | 1.5      | 0.879305 | 6.20856  | Unclassified | chr18:36664580-36677459   | 10.88   |
| Lcn2          | 0 | 0 | 0 | 11   | 0.183333 | 1.89315  | 0.462214 | Unclassified | chr2:32240156-32245259    | 3.104   |
| Csn1s1        | 0 | 0 | 0 | 7    | 0.116667 | 0.019567 | 0        | Unclassified | chr5:88093248-88111599    | 16.352  |
| Dcdc2a        | 0 | 0 | 0 | 159  | 2.65     | 0.111722 | 1.002295 | Unclassified | chr13:25145872-25302575   | 154.704 |
| Csn2          | 0 | 0 | 0 | 4    | 0.066667 | 0.022886 | 0.659052 | Unclassified | chr5:88121648-88130446    | 6.799   |
| Hemt1         | 0 | 0 | 0 | 7    | 0.116667 | 0.11161  | 2.370008 | Unclassified | chr15:74647505-74654866   | 5.362   |
| Lbx2          | 0 | 0 | 0 | 19   | 0.316667 | 0.643169 | 1.344335 | Unclassified | chr6:83034358-83038235    | 1.878   |
| Lbx1          | 0 | 0 | 0 | 5    | 0.083333 | 0.178005 | 0.406375 | Unclassified | chr19:45308217-45311726   | 1.51    |
| Lcat          | 0 | 0 | 0 | 42   | 0.7      | 0.444224 | 2.365881 | Unclassified | chr8:108463456-108469302  | 3.847   |
| BC014805      | 0 | 0 | 0 | 10   | 0.166667 | 0.025566 | 0        | Unclassified | chr19:7856472-7879157     | 20.686  |
| Stk17b        | 0 | 0 | 0 | 1226 | 20.43333 | 22.4278  | 11.46607 | Unclassified | chr1:53812355-53844059    | 29.705  |
| Bicd1         | 0 | 0 | 0 | 169  | 2.816667 | 0        | 36.51111 | Stalled      | chr6:149355407-149507379  | 149.973 |
| Hrk           | 0 | 0 | 0 | 39   | 0.65     | 0.112256 | 0.710069 | Unclassified | chr5:118617772-118639487  | 19.716  |
| Bik           | 0 | 0 | 0 | 115  | 1.916667 | 0.869825 | 2.750626 | Unclassified | chr15:83355291-83375065   | 17.775  |
| Nap1l1        | 0 | 0 | 0 | 1021 | 17.01667 | 91.6341  | 5.645344 | Unclassified | chr10:110908247-110935200 | 24.954  |
| Hpcal1        | 0 | 0 | 0 | 308  | 5.133333 | 3.00084  | 8.679291 | Unclassified | chr12:17695619-17798732   | 101.114 |
| Pcdh12        | 0 | 0 | 0 | 25   | 0.416667 | 0.073407 | 0.979316 | Unclassified | chr18:38426745-38446055   | 17.311  |
| Psmd1         | 0 | 0 | 0 | 1046 | 17.43333 | 32.7587  | 16.179   | Unclassified | chr1:87959193-88035870    | 74.678  |
| Gpr137c       | 0 | 0 | 0 | 382  | 6.366667 | 2.43788  | 103.3571 | Stalled      | chr14:45837391-45900651   | 61.261  |
| Adam10        | 0 | 0 | 0 | 785  | 13.08333 | 11.41    | 61.98226 | Stalled      | chr9:70524807-70628036    | 101.223 |
| Krtcap3       | 0 | 0 | 0 | 107  | 1.783333 | 3.20329  | 2.91299  | Unclassified | chr5:31552078-31555570    | 1.493   |
| AW146154      | 0 | 0 | 0 | 157  | 2.616667 | 5.48953  | 36.80699 | Stalled      | chr7:48734243-48757280    | 21.018  |
| C230052I12Rik | 0 | 0 | 0 | 333  | 5.55     | 16.1653  | 4.358255 | Unclassified | chr7:36177170-36183786    | 4.617   |
| Gm16432       | 0 | 0 | 0 | 39   | 0.65     | 0.007925 | 2.514484 | Unclassified | chr1:179919565-179978422  | 56.858  |
| Slc7a14       | 0 | 0 | 0 | 146  | 2.433333 | 0.063792 | 0        | Unclassified | chr3:31101777-31211241    | 107.465 |
| Slc9a7        | 0 | 0 | 0 | 1018 | 16.96667 | 13.2924  | 17.61177 | Unclassified | chrX:19682880-19870890    | 186.011 |
| Pmp22         | 0 | 0 | 0 | 41   | 0.683333 | 0.120976 | 0        | Unclassified | chr11:62943011-62973048   | 28.038  |
| Pmp2          | 0 | 0 | 0 | 8    | 0.133333 | 0.061064 | 0.671979 | Unclassified | chr3:10179850-10185885    | 4.036   |
| Oifr1501      | 0 | 0 | 0 | 1    | 0.016667 | 0.054013 | 1        | Unclassified | chr19:13912713-13915661   | 0.949   |
| Obox3         | 0 | 0 | 0 | 1    | 0.016667 | 0.003289 | 1        | Unclassified | chr7:16210654-16227126    | 14.473  |
| Stxbp3b       | 0 | 0 | 0 | 0    | 0        | 2.11718  | 0        | Unclassified | chr19:9632095-9635738     | 1.644   |
| Pla2g2f       | 0 | 0 | 0 | 12   | 0.2      | 0.026295 | 1.293879 | Unclassified | chr4:138306447-138315513  | 7.067   |
| Pla2g2e       | 0 | 0 | 0 | 16   | 0.266667 | 0.030121 | 0.520909 | Unclassified | chr4:138431856-138438729  | 4.874   |
| Slc26a5       | 0 | 0 | 0 | 59   | 0.983333 | 0.017308 | 1.999092 | Unclassified | chr5:21316472-21373422    | 54.951  |
| Mrgprh        | 0 | 0 | 0 | 6    | 0.1      | 0.021254 | 0.864769 | Unclassified | chr17:13066899-13070708   | 1.81    |
| Fundc2        | 0 | 0 | 0 | 179  | 2.983333 | 4.76903  | 38.71383 | Stalled      | chrX:72625737-72642496    | 14.76   |
| Bmi1          | 0 | 0 | 0 | 245  | 4.083333 | 5.23154  | 26.19962 | Stalled      | chr2:18596644-18608256    | 9.613   |
| Syt13         | 0 | 0 | 0 | 79   | 1.316667 | 0.109242 | 1.784336 | Unclassified | chr2:92753257-92796208    | 40.952  |
| Vstm2b        | 0 | 0 | 0 | 32   | 0.533333 | 0.061659 | 0.99484  | Unclassified | chr7:48152647-48185338    | 30.692  |
| Atp6v1c2      | 0 | 0 | 0 | 362  | 6.033333 | 0.196293 | 0.796121 | Unclassified | chr12:17291526-17333536   | 40.011  |
| Tmem53        | 0 | 0 | 0 | 64   | 1.066667 | 2.55408  | 3.432799 | Unclassified | chr4:116922593-116941185  | 16.593  |
| Taf11         | 0 | 0 | 0 | 186  | 3.1      | 22.9089  | 10.48574 | Unclassified | chr17:28038072-28046669   | 6.598   |
| Lrrc3b        | 0 | 0 | 0 | 74   | 1.233333 | 0.04638  | 2.153476 | Unclassified | chr14:16190032-16273501   | 81.47   |
| Rsad2         | 0 | 0 | 0 | 98   | 1.633333 | 1.05975  | 11.65509 | Stalled      | chr12:27127607-27143317   | 13.711  |
| Rad18         | 0 | 0 | 0 | 861  | 14.35    | 4.73024  | 24.51083 | Unclassified | chr6:112569844-112648664  | 76.821  |
| Sdccag3       | 0 | 0 | 0 | 494  | 8.233333 | 15.0141  | 14.82888 | Unclassified | chr2:26238319-26246836    | 6.518   |
| Svep1         | 0 | 0 | 0 | 154  | 2.566667 | 0.039207 | 1.040927 | Unclassified | chr4:58055667-58221468    | 163.802 |
| Lzts1         | 0 | 0 | 0 | 16   | 0.266667 | 0.156731 | 0        | Unclassified | chr8:71659402-71666852    | 5.451   |
| Eps82         | 0 | 0 | 0 | 77   | 1.283333 | 0.365455 | 5.11353  | Unclassified | chr7:148522900-148548915  | 24.016  |
| Fam189a2      | 0 | 0 | 0 | 47   | 0.783333 | 0.138318 | 1.131044 | Unclassified | chr19:24047239-24107509   | 58.271  |
| Mfsd2b        | 0 | 0 | 0 | 63   | 1.05     | 0.268568 | 6.107495 | Unclassified | chr12:4869243-4883165     | 11.923  |

|               |   |   |   |      |          |          |          |              |                           |         |
|---------------|---|---|---|------|----------|----------|----------|--------------|---------------------------|---------|
| 4430402I18Rik | 0 | 0 | 0 | 189  | 3.15     | 0.364111 | 69.07926 | Stalled      | chr19:28997553-29040644   | 41.092  |
| 6430598A04Rik | 0 | 0 | 0 | 23   | 0.383333 | 0.523489 | 0.308676 | Unclassified | chr5:138172190-138183226  | 9.037   |
| Gp1bb         | 0 | 0 | 0 | 15   | 0.25     | 1.70724  | 1.494691 | Unclassified | chr16:18620411-18624496   | 2.086   |
| Cacng4        | 0 | 0 | 0 | 81   | 1.35     | 0.143272 | 0.423157 | Unclassified | chr11:107596093-107657778 | 59.686  |
| Lpin1         | 0 | 0 | 0 | 928  | 15.46667 | 3.03596  | 5.72373  | Unclassified | chr12:16542474-16598576   | 54.103  |
| Cdc42bpb      | 0 | 0 | 0 | 443  | 7.383333 | 4.03376  | 17.06957 | Stalled      | chr12:112531183-112617929 | 84.747  |
| Zfp509        | 0 | 0 | 0 | 543  | 9.05     | 2.77782  | 25.41762 | Unclassified | chr5:38591282-38613667    | 20.386  |
| Klk14         | 0 | 0 | 0 | 11   | 0.183333 | 0.034041 | 0.679494 | Unclassified | chr7:50943788-50950389    | 4.602   |
| Eif5          | 0 | 0 | 0 | 1104 | 18.4     | 35.3306  | 13.83278 | Unclassified | chr12:112774311-112784964 | 8.654   |
| Cenpf         | 0 | 0 | 0 | 480  | 8        | 4.90253  | 19.69053 | Unclassified | chr1:191464492-191513965  | 47.474  |
| Kcne2         | 0 | 0 | 0 | 10   | 0.166667 | 0.030335 | 0.403849 | Unclassified | chr16:92290633-92298374   | 5.742   |
| 1700039E15Rik | 0 | 0 | 0 | 18   | 0.3      | 0.066598 | 1.450786 | Unclassified | chr7:52536242-52544363    | 6.122   |
| Syf2          | 0 | 0 | 0 | 381  | 6.35     | 33.8546  | 16.27599 | Unclassified | chr4:134484894-134493452  | 6.559   |
| Col27a1       | 0 | 0 | 0 | 257  | 4.283333 | 0.238303 | 1.995289 | Unclassified | chr4:62874445-62996024    | 119.58  |
| Cdk17         | 0 | 0 | 0 | 1181 | 19.68333 | 4.88775  | 16.19524 | Unclassified | chr10:92621620-92704087   | 80.468  |
| Greb1         | 0 | 0 | 0 | 174  | 2.9      | 0.077732 | 0.429089 | Unclassified | chr12:16677420-16809692   | 130.273 |
| Olfr410       | 0 | 0 | 0 | 0    | 0        | 0.060821 | 0        | Unclassified | chr11:74147783-74150731   | 0.949   |
| Kcnh5         | 0 | 0 | 0 | 149  | 2.483333 | 0.056807 | 0        | Unclassified | chr12:75998203-76280319   | 280.117 |
| Olfr1451      | 0 | 0 | 0 | 1    | 0.016667 | 0        | 1        | Unclassified | chr19:13071477-13074410   | 0.934   |
| Olfr401       | 0 | 0 | 0 | 2    | 0.033333 | 0        | 1        | Unclassified | chr11:73932792-73935740   | 0.949   |
| Olfr43        | 0 | 0 | 0 | 1    | 0.016667 | 0.030659 | 0        | Unclassified | chr11:74019699-74022791   | 1.093   |
| Olfr411       | 0 | 0 | 0 | 3    | 0.05     | 0.027473 | 2        | Unclassified | chr11:74160151-74163084   | 0.934   |
| Olfr398       | 0 | 0 | 0 | 2    | 0.033333 | 0        | 2        | Unclassified | chr11:73797163-73800108   | 0.946   |
| Olfr1342      | 0 | 0 | 0 | 0    | 0        | 0        | 0        | Unclassified | chr4:118362107-118365055  | 0.949   |
| Olfr415       | 0 | 0 | 0 | 0    | 0        | 0.038008 | 0        | Unclassified | chr1:176319176-176322186  | 1.011   |
| Hsf5          | 0 | 0 | 0 | 368  | 6.133333 | 0.046235 | 1.812031 | Unclassified | chr11:87428665-87473044   | 42.38   |
| Mettl5        | 0 | 0 | 0 | 457  | 7.616667 | 11.243   | 18.84719 | Unclassified | chr2:69709251-69725661    | 14.411  |
| Efhd1         | 0 | 0 | 0 | 75   | 1.25     | 0.15621  | 2.42441  | Unclassified | chr1:89158938-89207366    | 46.429  |
| Slc26a7       | 0 | 0 | 0 | 64   | 1.066667 | 0.048649 | 0        | Unclassified | chr4:14432343-14550925    | 116.583 |
| Npas2         | 0 | 0 | 0 | 206  | 3.433333 | 0.116512 | 2.29486  | Unclassified | chr1:39249116-39420085    | 168.97  |
| Npas1         | 0 | 0 | 0 | 132  | 2.2      | 0.490407 | 0.134577 | Unclassified | chr7:17041070-17064129    | 21.06   |
| Ccr3          | 0 | 0 | 0 | 8    | 0.133333 | 0.066568 | 0.554707 | Unclassified | chr9:123934702-123946421  | 9.72    |
| Lcn14         | 0 | 0 | 0 | 7    | 0.116667 | 0.052526 | 0.258344 | Unclassified | chr2:25590528-25595617    | 3.09    |
| Ushbp1        | 0 | 0 | 0 | 42   | 0.7      | 0.05778  | 1.034656 | Unclassified | chr8:73908172-73921700    | 11.529  |
| 2810055F11Rik | 0 | 0 | 0 | 174  | 2.9      | 1.78881  | 19.67069 | Stalled      | chr12:73174414-73188300   | 11.887  |
| Mboat2        | 0 | 0 | 0 | 126  | 2.1      | 0.568772 | 1.043735 | Unclassified | chr12:25514463-25645164   | 128.702 |
| Lcn10         | 0 | 0 | 0 | 6    | 0.1      | 0.069528 | 0        | Unclassified | chr2:25536245-25541601    | 3.357   |
| Samsn1        | 0 | 0 | 0 | 2520 | 42       | 48.9737  | 3.455827 | Unclassified | chr16:75859038-75911511   | 50.474  |
| Cmtm6         | 0 | 0 | 0 | 558  | 9.3      | 21.6099  | 12.58721 | Unclassified | chr9:114638320-114658461  | 18.142  |
| Armc10        | 0 | 0 | 0 | 299  | 4.983333 | 9.06217  | 17.14215 | Unclassified | chr5:21149801-21168410    | 16.61   |
| Gatad1        | 0 | 0 | 0 | 212  | 3.533333 | 8.77188  | 9.088756 | Unclassified | chr5:3639960-3649936      | 7.977   |
| 4930583H14Rik | 0 | 0 | 0 | 22   | 0.366667 | 5.41647  | 2.362922 | Unclassified | chr3:51192336-51202469    | 8.134   |
| Ecsr          | 0 | 0 | 0 | 17   | 0.283333 | 0.103823 | 0.763142 | Unclassified | chr18:35872742-35883145   | 8.404   |
| Med18         | 0 | 0 | 0 | 341  | 5.683333 | 7.07624  | 7.916511 | Unclassified | chr4:132014643-132021836  | 5.194   |
| Olfr103       | 0 | 0 | 0 | 0    | 0        | 0.009585 | 0        | Unclassified | chr17:37473233-37476175   | 0.943   |
| Olfr101       | 0 | 0 | 0 | 5    | 0.083333 | 0.062166 | 3        | Unclassified | chr17:37436438-37439365   | 0.928   |
| Olfr109       | 0 | 0 | 0 | 2    | 0.033333 | 0.081374 | 2        | Unclassified | chr17:37601152-37604097   | 0.946   |
| Trim66        | 0 | 0 | 0 | 74   | 1.233333 | 0.087459 | 0        | Unclassified | chr7:116592514-116653648  | 59.135  |
| Olfr272       | 0 | 0 | 0 | 2    | 0.033333 | 0        | 0        | Unclassified | chr4:52923704-52926664    | 0.961   |
| Pop4          | 0 | 0 | 0 | 241  | 4.016667 | 19.3063  | 11.39099 | Unclassified | chr7:39047838-39058367    | 8.53    |
| Olfr617       | 0 | 0 | 0 | 1    | 0.016667 | 0.026753 | 0        | Unclassified | chr7:110730537-110733494  | 0.958   |
| Grina         | 0 | 0 | 0 | 146  | 2.433333 | 18.9986  | 16.82092 | Stalled      | chr15:76075236-76080334   | 3.099   |
| Nudt16        | 0 | 0 | 0 | 361  | 6.016667 | 10.8117  | 6.595419 | Unclassified | chr9:105031667-105036135  | 2.469   |
| Rprl2         | 0 | 0 | 0 | 0    | 0        | 0.049587 | 0        | Unclassified | chr3:22147862-22150561    | 0.7     |
| Pbx1          | 0 | 0 | 0 | 347  | 5.783333 | 0.795949 | 6.781443 | Unclassified | chr1:170049494-170364389  | 312.896 |
| Snappc2       | 0 | 0 | 0 | 211  | 3.516667 | 9.32189  | 6.256027 | Unclassified | chr8:4251101-4256220      | 3.12    |
| Rprl3         | 0 | 0 | 0 | 0    | 0        | 0.327705 | 0        | Unclassified | chr8:3803097-3805689      | 0.593   |
| Gm1587        | 0 | 0 | 0 | 6    | 0.1      | 0.066259 | 1.003115 | Unclassified | chr14:78193751-78200775   | 5.025   |
| H2-T23        | 0 | 0 | 0 | 304  | 5.066667 | 129.53   | 2.285967 | Elongating   | chr17:36166921-36171646   | 2.726   |
| Olfm4         | 0 | 0 | 0 | 22   | 0.366667 | 0.054704 | 0.520565 | Unclassified | chr14:80398108-80421737   | 21.63   |
| Chic1         | 0 | 0 | 0 | 38   | 0.633333 | 1.27344  | 8.50344  | Unclassified | chrX:100549894-100585381  | 33.488  |
| Lmo7          | 0 | 0 | 0 | 2628 | 43.8     | 10.2158  | 10.2277  | Unclassified | chr14:102127144-102333910 | 204.767 |
| Serpnb6c      | 0 | 0 | 0 | 11   | 0.183333 | 0.503267 | 0        | Unclassified | chr13:33971684-33999577   | 25.894  |
| Kif5b         | 0 | 0 | 0 | 1064 | 17.73333 | 19.1752  | 18.5746  | Unclassified | chr18:6201002-6243522     | 40.521  |
| Lce1a2        | 0 | 0 | 0 | 1    | 0.016667 | 0.017882 | 0        | Unclassified | chr3:92472534-92476237    | 1.704   |
| Cst6          | 0 | 0 | 0 | 12   | 0.2      | 0.283815 | 0.983611 | Unclassified | chr19:5344704-5351574     | 4.871   |
| 1110017D15Rik | 0 | 0 | 0 | 26   | 0.433333 | 1.11938  | 0.361553 | Unclassified | chr4:41452041-41466366    | 12.326  |
| Efhc2         | 0 | 0 | 0 | 41   | 0.683333 | 0.070392 | 0        | Unclassified | chrX:16709179-16898494    | 187.316 |
| Olfr1232      | 0 | 0 | 0 | 1    | 0.016667 | 0.027385 | 0        | Unclassified | chr2:89165399-89168335    | 0.937   |
| Olfr835       | 0 | 0 | 0 | 0    | 0        | 0        | 0        | Unclassified | chr9:18837568-18840504    | 0.937   |
| Wbp2nl        | 0 | 0 | 0 | 20   | 0.333333 | 0.087517 | 3.419456 | Unclassified | chr15:82127413-82144988   | 15.576  |
| Spata17       | 0 | 0 | 0 | 290  | 4.833333 | 4.82095  | 76.36842 | Stalled      | chr1:188872285-189041325  | 167.041 |
| 4933426M11Rik | 0 | 0 | 0 | 782  | 13.03333 | 4.57924  | 22.82514 | Unclassified | chr12:81889545-81981820   | 90.276  |
| Ngef          | 0 | 0 | 0 | 164  | 2.733333 | 0.168829 | 0.370761 | Unclassified | chr1:89373403-89472445    | 97.043  |
| 1190003J15Rik | 0 | 0 | 0 | 6    | 0.1      | 0.037974 | 0.269273 | Unclassified | chr7:148019394-148023867  | 2.474   |
| Pfn4          | 0 | 0 | 0 | 108  | 1.8      | 1.05985  | 37.92295 | Stalled      | chr12:4774100-4785072     | 8.973   |
| Rasgef1b      | 0 | 0 | 0 | 165  | 2.75     | 0.929097 | 11.38371 | Stalled      | chr5:99646438-99683946    | 35.509  |
| CK137956      | 0 | 0 | 0 | 38   | 0.633333 | 0.011614 | 1.640759 | Unclassified | chr4:127604837-127650085  | 43.249  |
| Cox4nb        | 0 | 0 | 0 | 715  | 11.91667 | 11.731   | 21.58365 | Unclassified | chr8:123177813-123194012  | 14.2    |
| P2rx2         | 0 | 0 | 0 | 95   | 1.583333 | 0.569528 | 0.255992 | Unclassified | chr5:110768830-110774054  | 3.225   |
| Chfr          | 0 | 0 | 0 | 471  | 7.85     | 14.9504  | 18.32316 | Unclassified | chr5:110562858-110600991  | 36.134  |
| Ubac1         | 0 | 0 | 0 | 286  | 4.766667 | 6.42509  | 16.11692 | Unclassified | chr2:25852477-25879280    | 24.804  |
| Galnt9        | 0 | 0 | 0 | 107  | 1.783333 | 0.066291 | 1.267042 | Unclassified | chr5:110971363-111050401  | 77.039  |
| Olfr1283      | 0 | 0 | 0 | 0    | 0        | 0        | 0        | Unclassified | chr2:111206790-111209708  | 0.919   |
| Abca17        | 0 | 0 | 0 | 158  | 2.633333 | 0.19796  | 0.691845 | Unclassified | chr17:24401223-24486197   | 82.975  |
| 2900092C05Rik | 0 | 0 | 0 | 13   | 0.216667 | 0        | 0        | Unclassified | chr7:13095899-13141668    | 43.77   |



|                      |   |   |   |      |          |          |          |              |                           |          |
|----------------------|---|---|---|------|----------|----------|----------|--------------|---------------------------|----------|
| <b>Fmo3</b>          | 0 | 0 | 0 | 14   | 0.233333 | 0.019114 | 0        | Unclassified | chr1:164883930-164916622  | 30.693   |
| <b>Sgip1</b>         | 0 | 0 | 0 | 200  | 3.333333 | 0.024169 | 0.517022 | Unclassified | chr4:102430967-102643782  | 210.816  |
| <b>Hiat1</b>         | 0 | 0 | 0 | 849  | 14.15    | 10.7386  | 17.11293 | Unclassified | chr3:116334086-116367595  | 31.51    |
| <b>Olfr1406</b>      | 0 | 0 | 0 | 0    | 0        | 0.042184 | 0        | Unclassified | chr1:175113572-175116635  | 1.064    |
| <b>Ctps2</b>         | 0 | 0 | 0 | 436  | 7.266667 | 3.39495  | 13.0023  | Stalled      | chrX:159337526-159472469  | 132.944  |
| <b>Rad5113</b>       | 0 | 0 | 0 | 314  | 5.233333 | 3.6393   | 11.61701 | Unclassified | chr11:82686566-82706117   | 17.552   |
| <b>Krt10</b>         | 0 | 0 | 0 | 160  | 2.666667 | 2.14279  | 0.23262  | Unclassified | chr11:99246568-99252678   | 4.111    |
| <b>Krt16</b>         | 0 | 0 | 0 | 3    | 0.05     | 0.098218 | 1.288762 | Unclassified | chr11:100107405-100112216 | 2.812    |
| <b>Krt15</b>         | 0 | 0 | 0 | 7    | 0.116667 | 0.037257 | 0        | Unclassified | chr11:99993072-99999263   | 4.192    |
| <b>Barhl2</b>        | 0 | 0 | 0 | 21   | 0.35     | 0.289146 | 1.116251 | Unclassified | chr5:106881541-106889185  | 5.645    |
| <b>Rcor2</b>         | 0 | 0 | 0 | 167  | 2.783333 | 2.15055  | 0.35291  | Unclassified | chr19:7342253-7349715     | 5.463    |
| <b>Krt18</b>         | 0 | 0 | 0 | 10   | 0.166667 | 0.333875 | 4.426023 | Unclassified | chr15:101856646-101862457 | 3.812    |
| <b>Krt19</b>         | 0 | 0 | 0 | 10   | 0.166667 | 0.028004 | 0.902185 | Unclassified | chr11:100002125-100009233 | 5.109    |
| <b>Cyp2u1</b>        | 0 | 0 | 0 | 66   | 1.1      | 2.75139  | 12.48094 | Stalled      | chr3:130993408-131008145  | 12.738   |
| <b>Rhox9</b>         | 0 | 0 | 0 | 2    | 0.033333 | 0        | 0        | Unclassified | chrX:35252273-35256947    | 2.675    |
| <b>Apom</b>          | 0 | 0 | 0 | 100  | 1.666667 | 0.125475 | 1.014586 | Elongating   | chr17:35265941-35270697   | 2.757    |
| <b>Sic18a2</b>       | 0 | 0 | 0 | 319  | 5.316667 | 0.192093 | 0.911276 | Unclassified | chr19:59333367-59370502   | 35.136   |
| <b>Shank3</b>        | 0 | 0 | 0 | 78   | 1.3      | 0.053941 | 0.904135 | Unclassified | chr15:89328287-89390689   | 60.403   |
| <b>Ckmt1</b>         | 0 | 0 | 0 | 9    | 0.15     | 0.265943 | 1.217469 | Unclassified | chr2:121182376-121189473  | 5.098    |
| <b>Itga1</b>         | 0 | 0 | 0 | 449  | 7.483333 | 0.415641 | 0.973853 | Unclassified | chr13:115748288-115894172 | 143.885  |
| <b>Gyt3a2</b>        | 0 | 0 | 0 | 11   | 0.183333 | 0.023345 | 0.774134 | Unclassified | chr15:9263352-9300625     | 35.274   |
| <b>Gstm2</b>         | 0 | 0 | 0 | 7    | 0.116667 | 0.135506 | 1.448811 | Unclassified | chr3:107784619-107791354  | 4.736    |
| <b>Abcd4</b>         | 0 | 0 | 0 | 283  | 4.716667 | 2.45528  | 17.0532  | Unclassified | chr12:85943481-85960416   | 14.936   |
| <b>Gpr110</b>        | 0 | 0 | 0 | 35   | 0.583333 | 0.040144 | 0        | Unclassified | chr17:43405295-43461354   | 54.06    |
| <b>Ddx10</b>         | 0 | 0 | 0 | 816  | 13.6     | 10.3495  | 45.38229 | Stalled      | chr9:52906558-53058217    | 149.666  |
| <b>Usp45</b>         | 0 | 0 | 0 | 421  | 7.016667 | 1.42924  | 29.86135 | Stalled      | chr4:21701416-21765019    | 61.604   |
| <b>Actr8</b>         | 0 | 0 | 0 | 362  | 6.033333 | 11.4191  | 13.0728  | Unclassified | chr14:30789522-30806407   | 14.886   |
| <b>Ccin</b>          | 0 | 0 | 0 | 17   | 0.283333 | 0.031567 | 0.767303 | Unclassified | chr4:43994375-43998405    | 2.031    |
| <b>Rprl1</b>         | 0 | 0 | 0 | 1    | 0.016667 | 0.037447 | 0        | Unclassified | chr6:69276676-69279511    | 0.836    |
| <b>Pxmp3</b>         | 0 | 0 | 0 | 326  | 5.433333 | 6.27206  | 39.1521  | Stalled      | chr3:5560187-5578150      | 15.964   |
| <b>Tspan12</b>       | 0 | 0 | 0 | 52   | 0.866667 | 0.241915 | 1.241028 | Unclassified | chr6:21721394-21804515    | 81.122   |
| <b>Cdk13</b>         | 0 | 0 | 0 | 1347 | 22.45    | 9.78485  | 51.36884 | Unclassified | chr13:17807795-17898931   | 89.137   |
| <b>Olfr583</b>       | 0 | 0 | 0 | 0    | 0        | 0.040019 | 0        | Unclassified | chr7:110197813-110200773  | 0.961    |
| <b>Papd4</b>         | 0 | 0 | 0 | 764  | 12.73333 | 7.68823  | 29.60187 | Unclassified | chr13:93917354-93964238   | 44.885   |
| <b>Itgb1bp3</b>      | 0 | 0 | 0 | 20   | 0.333333 | 0.167169 | 0.321115 | Unclassified | chr10:80660914-80666782   | 3.869    |
| <b>Klik1</b>         | 0 | 0 | 0 | 5    | 0.083333 | 0.033492 | 0        | Unclassified | chr7:51029672-51034632    | 2.961    |
| <b>Gytl1b</b>        | 0 | 0 | 0 | 79   | 1.316667 | 0.449845 | 0.478648 | Unclassified | chr2:92205203-92213193    | 5.991    |
| <b>9030624J02Rik</b> | 0 | 0 | 0 | 930  | 15.5     | 7.32738  | 5.792991 | Unclassified | chr7:125881784-125985004  | 101.1221 |
| <b>Kcna1</b>         | 0 | 0 | 0 | 18   | 0.3      | 0.149984 | 1.230088 | Unclassified | chr6:126586480-126597819  | 9.34     |
| <b>Kap</b>           | 0 | 0 | 0 | 4    | 0.066667 | 0        | 0        | Unclassified | chr6:133799872-133805685  | 3.814    |
| <b>Jup</b>           | 0 | 0 | 0 | 93   | 1.55     | 0.248705 | 16.16051 | Stalled      | chr11:100231932-100261053 | 27.122   |
| <b>Guf1</b>          | 0 | 0 | 0 | 344  | 5.733333 | 3.39175  | 30.37912 | Stalled      | chr5:69946180-69964869    | 16.69    |
| <b>Zfp42</b>         | 0 | 0 | 0 | 11   | 0.183333 | 0.017765 | 0.522536 | Unclassified | chr8:44380420-44394363    | 11.944   |
| <b>Ddx52</b>         | 0 | 0 | 0 | 402  | 6.7      | 9.16314  | 10.25118 | Unclassified | chr11:83753591-83776579   | 20.989   |
| <b>Akr1c14</b>       | 0 | 0 | 0 | 18   | 0.3      | 0.015726 | 1.33085  | Unclassified | chr13:4056836-4089668     | 30.833   |
| <b>Zfp41</b>         | 0 | 0 | 0 | 150  | 2.5      | 2.31725  | 17.97753 | Stalled      | chr15:75445114-75455725   | 8.612    |
| <b>Fam181b</b>       | 0 | 0 | 0 | 4    | 0.066667 | 0.29207  | 1        | Unclassified | chr7:100226388-100230231  | 1.844    |
| <b>Il1r2</b>         | 0 | 0 | 0 | 575  | 9.583333 | 14.4066  | 5.448267 | Unclassified | chr1:40139612-40182070    | 40.459   |
| <b>Zfp51</b>         | 0 | 0 | 0 | 285  | 4.75     | 1.16531  | 37.68369 | Stalled      | chr17:21585315-21602553   | 15.239   |
| <b>2610301F02Rik</b> | 0 | 0 | 0 | 111  | 1.85     | 1.01294  | 2.152521 | Unclassified | chr2:76883027-77010693    | 125.667  |
| <b>Apex2</b>         | 0 | 0 | 0 | 252  | 4.2      | 5.94167  | 21.79964 | Stalled      | chrX:147006049-147024692  | 16.644   |
| <b>Olfr1386</b>      | 0 | 0 | 0 | 2    | 0.033333 | 0.112202 | 1        | Unclassified | chr11:49281654-49284584   | 0.931    |
| <b>Olfr132</b>       | 0 | 0 | 0 | 0    | 0        | 0        | 0        | Unclassified | chr17:38267193-38270135   | 0.943    |
| <b>Skint4</b>        | 0 | 0 | 0 | 27   | 0.45     | 0.022445 | 0        | Unclassified | chr4:111752074-111840681  | 86.608   |
| <b>Olfr744</b>       | 0 | 0 | 0 | 2    | 0.033333 | 0.029083 | 1        | Unclassified | chr14:51235898-51238870   | 0.973    |
| <b>Olfr885</b>       | 0 | 0 | 0 | 3    | 0.05     | 0        | 2        | Unclassified | chr9:37866906-37869836    | 0.931    |
| <b>Olfr225</b>       | 0 | 0 | 0 | 1    | 0.016667 | 0.071202 | 0        | Unclassified | chr11:59424467-59427727   | 1.261    |
| <b>Olfr1200</b>      | 0 | 0 | 0 | 0    | 0        | 0.021577 | 0        | Unclassified | chr2:88607459-88610470    | 1.012    |
| <b>Olfr1066</b>      | 0 | 0 | 0 | 1    | 0.016667 | 0        | 1        | Unclassified | chr2:86295484-86298426    | 0.943    |
| <b>Gm10436</b>       | 0 | 0 | 0 | 0    | 0        | 0.022664 | 0        | Unclassified | chr12:89414032-89422338   | 6.307    |
| <b>Olfr1344</b>      | 0 | 0 | 0 | 4    | 0.066667 | 0.05307  | 2        | Unclassified | chr7:6390612-6393578      | 0.967    |
| <b>Olfr1357</b>      | 0 | 0 | 0 | 2    | 0.033333 | 0.068027 | 2        | Unclassified | chr10:78074442-78077384   | 0.943    |
| <b>Acan</b>          | 0 | 0 | 0 | 70   | 1.166667 | 0.041821 | 1.930233 | Unclassified | chr7:86196368-86259985    | 61.618   |
| <b>Ager</b>          | 0 | 0 | 0 | 126  | 2.1      | 2.63759  | 0.953307 | Unclassified | chr17:34732806-34737877   | 3.072    |
| <b>Gm436</b>         | 0 | 0 | 0 | 10   | 0.166667 | 0        | 0        | Unclassified | chr4:144259839-144278271  | 16.433   |
| <b>Aga</b>           | 0 | 0 | 0 | 169  | 2.816667 | 7.80492  | 22.08823 | Stalled      | chr8:54595079-54608776    | 11.698   |
| <b>Nppa</b>          | 0 | 0 | 0 | 57   | 0.95     | 0.26282  | 0.750944 | Unclassified | chr4:147372854-147376176  | 1.323    |
| <b>Alg9</b>          | 0 | 0 | 0 | 616  | 10.26667 | 4.12676  | 14.03104 | Unclassified | chr9:50581434-50651633    | 68.2     |
| <b>Khdrbs2</b>       | 0 | 0 | 0 | 203  | 3.383333 | 0.056584 | 2.125831 | Unclassified | chr1:32227650-32714583    | 484.934  |
| <b>Rhox2a</b>        | 0 | 0 | 0 | 0    | 0        | 0.029795 | 0        | Unclassified | chrX:34782986-34789685    | 4.7      |
| <b>Mep1a</b>         | 0 | 0 | 0 | 24   | 0.4      | 0.021923 | 0        | Unclassified | chr17:43611277-43641722   | 28.446   |
| <b>Meox2</b>         | 0 | 0 | 0 | 26   | 0.433333 | 0.049126 | 0.744637 | Unclassified | chr12:37833132-37906115   | 70.984   |
| <b>Fam184b</b>       | 0 | 0 | 0 | 151  | 2.516667 | 0.410321 | 1.275983 | Unclassified | chr5:45920943-46032740    | 109.798  |
| <b>Mrc2</b>          | 0 | 0 | 0 | 126  | 2.1      | 0.057443 | 5.015632 | Unclassified | chr11:105151959-105212459 | 58.501   |
| <b>Meis3</b>         | 0 | 0 | 0 | 104  | 1.733333 | 3.64249  | 9.754839 | Unclassified | chr7:16758728-16771852    | 11.125   |
| <b>Mep1b</b>         | 0 | 0 | 0 | 23   | 0.383333 | 0        | 0.549706 | Unclassified | chr18:21228844-21258700   | 27.857   |
| <b>Ankrd7</b>        | 0 | 0 | 0 | 6    | 0.1      | 0.043225 | 0.803485 | Unclassified | chr6:18814317-18829582    | 13.266   |
| <b>Mrc1</b>          | 0 | 0 | 0 | 119  | 1.983333 | 0.539872 | 0.938184 | Unclassified | chr2:14149040-14253649    | 102.61   |
| <b>Tacstd2</b>       | 0 | 0 | 0 | 62   | 1.033333 | 4.29996  | 0.339794 | Unclassified | chr6:67484052-67487816    | 1.765    |
| <b>Dok2</b>          | 0 | 0 | 0 | 69   | 1.15     | 7.07498  | 1.035852 | Unclassified | chr14:71172187-71178301   | 4.115    |
| <b>Dok1</b>          | 0 | 0 | 0 | 260  | 4.333333 | 26.6802  | 2.861193 | Elongating   | chr6:82980929-82985465    | 2.537    |
| <b>Cdk2ap1</b>       | 0 | 0 | 0 | 707  | 11.78333 | 34.6788  | 0.706662 | Unclassified | chr5:124795447-124806637  | 9.191    |
| <b>Doc2b</b>         | 0 | 0 | 0 | 146  | 2.433333 | 0.347119 | 0        | Unclassified | chr11:75582591-75611559   | 26.969   |
| <b>Doc2a</b>         | 0 | 0 | 0 | 280  | 4.666667 | 5.50763  | 0.091918 | Unclassified | chr7:133989066-133996219  | 5.154    |
| <b>Gm11992</b>       | 0 | 0 | 0 | 21   | 0.35     | 0.759017 | 2.210491 | Unclassified | chr11:8946594-8969357     | 20.764   |
| <b>Prg3</b>          | 0 | 0 | 0 | 21   | 0.35     | 0.729275 | 1.586488 | Unclassified | chr2:84826371-84834043    | 5.673    |

|               |   |   |   |      |           |          |          |              |                           |         |
|---------------|---|---|---|------|-----------|----------|----------|--------------|---------------------------|---------|
| Ahr           | 0 | 0 | 0 | 496  | 8.266667  | 1.21519  | 12.61835 | Unclassified | chr12:36182650-36221661   | 37.012  |
| Ubr7          | 0 | 0 | 0 | 674  | 11.233333 | 14.149   | 16.11861 | Unclassified | chr12:103994184-104015911 | 19.728  |
| Ahsg          | 0 | 0 | 0 | 12   | 0.2       | 0        | 0.415509 | Unclassified | chr16:22890114-22899511   | 7.398   |
| Ahrr          | 0 | 0 | 0 | 203  | 3.383333  | 0.219308 | 2.935397 | Unclassified | chr13:74348565-74431757   | 81.193  |
| Apeh          | 0 | 0 | 0 | 335  | 5.583333  | 17.6884  | 5.403855 | Unclassified | chr9:107987745-107998811  | 9.067   |
| Habp2         | 0 | 0 | 0 | 43   | 0.716667  | 0.061258 | 0        | Unclassified | chr19:56360427-56394579   | 32.153  |
| Cd209d        | 0 | 0 | 0 | 11   | 0.183333  | 0.103956 | 1.343457 | Unclassified | chr8:3871823-3880499      | 6.677   |
| Cyp11a1       | 0 | 0 | 0 | 17   | 0.283333  | 0.072245 | 0.440179 | Unclassified | chr9:57860823-57874830    | 12.008  |
| Parp6         | 0 | 0 | 0 | 273  | 4.55      | 2.89093  | 46.65276 | Stalled      | chr9:59463090-59498076    | 32.987  |
| Tcf21         | 0 | 0 | 0 | 13   | 0.216667  | 0.104283 | 1.048323 | Unclassified | chr10:22537078-22541934   | 2.857   |
| Lrrc6         | 0 | 0 | 0 | 98   | 1.633333  | 0.215245 | 0.555667 | Unclassified | chr15:66211419-66334472   | 121.054 |
| Nap113        | 0 | 0 | 0 | 12   | 0.2       | 1.07962  | 6.46143  | Unclassified | chrX:119508169-119512994  | 2.826   |
| Atp7a         | 0 | 0 | 0 | 295  | 4.916667  | 0.876352 | 45.69214 | Stalled      | chrX:103220614-103323499  | 100.886 |
| Svs3a         | 0 | 0 | 0 | 2    | 0.033333  | 0.0533   | 1        | Unclassified | chr2:164113003-164117236  | 2.234   |
| Ntng2         | 0 | 0 | 0 | 268  | 4.466667  | 9.92649  | 1.229883 | Unclassified | chr2:29050340-29105560    | 53.221  |
| Gng13         | 0 | 0 | 0 | 52   | 0.866667  | 0.292436 | 1.960849 | Unclassified | chr17:25852116-25856047   | 1.932   |
| Tmtc3         | 0 | 0 | 0 | 138  | 2.3       | 1.47278  | 28.98313 | Stalled      | chr10:99906535-99951981   | 43.447  |
| Sntb1         | 0 | 0 | 0 | 216  | 3.6       | 2.01187  | 5.715482 | Unclassified | chr15:55470708-55740504   | 267.797 |
| E130112L23Rik | 0 | 0 | 0 | 86   | 1.433333  | 0.129298 | 1.257453 | Unclassified | chr14:52602507-52625922   | 21.416  |
| Neto2         | 0 | 0 | 0 | 39   | 0.65      | 0.217855 | 0.58435  | Unclassified | chr8:88160486-88216908    | 54.423  |
| Mbnl3         | 0 | 0 | 0 | 484  | 8.066667  | 1.14281  | 25.63748 | Stalled      | chrX:48466670-48561009    | 92.34   |
| Spg21         | 0 | 0 | 0 | 304  | 5.066667  | 10.5016  | 11.04978 | Unclassified | chr9:65306743-6536277     | 27.535  |
| Mt2           | 0 | 0 | 0 | 61   | 1.016667  | 3.09963  | 49       | Unclassified | chr8:96694517-96697467    | 0.951   |
| Mtap1b        | 0 | 0 | 0 | 127  | 2.116667  | 0.12646  | 2.662581 | Unclassified | chr13:100191418-100288557 | 95.14   |
| Npln1prp2     | 0 | 0 | 0 | 19   | 0.316667  | 0        | 1.056989 | Unclassified | chr19:58832212-58852024   | 17.813  |
| Dcx           | 0 | 0 | 0 | 22   | 0.366667  | 0.017451 | 0        | Unclassified | chrX:140290384-140369762  | 77.379  |
| Dctn1         | 0 | 0 | 0 | 127  | 2.116667  | 18.2603  | 1.441073 | Unclassified | chr6:83127582-83150112    | 20.531  |
| Dct           | 0 | 0 | 0 | 29   | 0.483333  | 0.045307 | 0.587522 | Unclassified | chr14:118412011-118453468 | 39.458  |
| Ddc           | 0 | 0 | 0 | 259  | 4.316667  | 0.111721 | 0.453205 | Unclassified | chr11:11714105-11792404   | 76.3    |
| Ankrd28       | 0 | 0 | 0 | 980  | 16.333333 | 3.02414  | 30.81794 | Unclassified | chr14:32513200-32645601   | 130.402 |
| Trpv4         | 0 | 0 | 0 | 151  | 2.516667  | 0.158741 | 1.591624 | Unclassified | chr5:115072163-115110430  | 36.268  |
| Pphn1         | 0 | 0 | 0 | 1224 | 20.4      | 6.79858  | 26.41887 | Unclassified | chr15:93226780-93322343   | 93.564  |
| AK129341      | 0 | 0 | 0 | 53   | 0.883333  | 0.140568 | 4.594468 | Unclassified | chr9:8076632-8136294      | 57.663  |
| Zfp389        | 0 | 0 | 0 | 87   | 1.45      | 0.054888 | 32.0405  | Stalled      | chr13:21596184-21600393   | 2.21    |
| Gm8994        | 0 | 0 | 0 | 0    | 0         | 7.16986  | 0        | Unclassified | chr6:136275556-136280001  | 2.446   |
| Hnrnpu        | 0 | 0 | 0 | 1529 | 25.483333 | 144.923  | 6.62007  | Unclassified | chr1:180258430-180269915  | 9.486   |
| Itna13        | 0 | 0 | 0 | 1    | 0.016667  | 0.034516 | 0        | Unclassified | chr4:88289544-88292363    | 0.82    |
| Olfr113       | 0 | 0 | 0 | 3    | 0.05      | 0        | 1        | Unclassified | chr17:37711427-37714366   | 0.94    |
| Fzd6          | 0 | 0 | 0 | 52   | 0.866667  | 0.276362 | 7.496728 | Unclassified | chr15:38835878-38869734   | 31.857  |
| Dync111       | 0 | 0 | 0 | 215  | 3.583333  | 0.065223 | 1.171854 | Unclassified | chr6:5673638-5978039      | 302.402 |
| Sgk1          | 0 | 0 | 0 | 188  | 3.133333  | 3.25031  | 44.09239 | Stalled      | chr10:21712471-21719706   | 5.236   |
| Sgce          | 0 | 0 | 0 | 49   | 0.816667  | 0.347613 | 2.480873 | Unclassified | chr6:4624349-4699204      | 72.856  |
| Sgca          | 0 | 0 | 0 | 24   | 0.4       | 0.087484 | 0.746531 | Unclassified | chr11:94824135-94839641   | 13.507  |
| Sgpl1         | 0 | 0 | 0 | 674  | 11.233333 | 10.917   | 27.8584  | Unclassified | chr10:60561391-60612413   | 49.023  |
| Sim1          | 0 | 0 | 0 | 60   | 1         | 0.050533 | 2.508505 | Unclassified | chr10:50613456-50708958   | 93.503  |
| Scg5          | 0 | 0 | 0 | 301  | 5.016667  | 0.041781 | 16.18262 | Stalled      | chr2:113616469-113671248  | 52.78   |
| 2610002M06Rik | 0 | 0 | 0 | 146  | 2.433333  | 1.60188  | 22.70476 | Stalled      | chrX:104978092-105013673  | 33.582  |
| Tmem25        | 0 | 0 | 0 | 106  | 1.766667  | 0.125223 | 10.92619 | Stalled      | chr9:44601861-44609299    | 5.439   |
| Ii21          | 0 | 0 | 0 | 16   | 0.266667  | 0.02086  | 0        | Unclassified | chr3:37121680-37133540    | 9.861   |
| Defb26        | 0 | 0 | 0 | 0    | 0         | 0        | 0        | Unclassified | chr2:152333533-152339428  | 3.896   |
| Nmi           | 0 | 0 | 0 | 219  | 3.65      | 12.9709  | 15.20037 | Stalled      | chr2:51804018-51830728    | 24.711  |
| Pdia5         | 0 | 0 | 0 | 123  | 2.05      | 0.205458 | 1.344331 | Unclassified | chr16:35397397-35492959   | 93.563  |
| Thap4         | 0 | 0 | 0 | 455  | 7.583333  | 9.68114  | 31.02615 | Stalled      | chr1:95601967-95653415    | 49.449  |
| Mkrr2         | 0 | 0 | 0 | 529  | 8.816667  | 3.80369  | 5.459156 | Unclassified | chr6:115549955-115568688  | 16.734  |
| P2rx6         | 0 | 0 | 0 | 20   | 0.333333  | 0.050948 | 0.336479 | Unclassified | chr16:17559977-17572104   | 10.128  |
| Lhfp          | 0 | 0 | 0 | 213  | 3.55      | 0.276082 | 6.273908 | Unclassified | chr3:52843468-53065601    | 220.134 |
| P2ry2         | 0 | 0 | 0 | 80   | 1.333333  | 1.08025  | 6.366787 | Unclassified | chr7:108145085-108162505  | 15.421  |
| Ncoa5         | 0 | 0 | 0 | 790  | 13.166667 | 15.1367  | 10.56779 | Unclassified | chr2:164825856-164862279  | 34.424  |
| Cryab         | 0 | 0 | 0 | 9    | 0.15      | 0.064893 | 0        | Unclassified | chr9:50558862-50564738    | 3.877   |
| Cryba1        | 0 | 0 | 0 | 79   | 1.316667  | 0        | 0.204615 | Unclassified | chr11:77532233-77540795   | 6.563   |
| Hapln1        | 0 | 0 | 0 | 47   | 0.783333  | 0.050708 | 0.614704 | Unclassified | chr13:89678240-89751437   | 71.198  |
| Crx           | 0 | 0 | 0 | 12   | 0.2       | 0        | 0        | Unclassified | chr7:16451295-16467304    | 14.01   |
| Tbx18         | 0 | 0 | 0 | 19   | 0.316667  | 0.038348 | 2.649366 | Unclassified | chr9:87597634-87628095    | 28.462  |
| Trp53rk       | 0 | 0 | 0 | 303  | 5.05      | 2.99312  | 6.562743 | Unclassified | chr2:166617266-166624992  | 5.727   |
| Mtif3         | 0 | 0 | 0 | 341  | 5.683333  | 6.70028  | 3.911114 | Unclassified | chr5:147766097-147777350  | 9.254   |
| Cryba2        | 0 | 0 | 0 | 5    | 0.083333  | 0.219082 | 1.046029 | Unclassified | chr1:74936517-74941709    | 3.193   |
| Cryba4        | 0 | 0 | 0 | 27   | 0.45      | 0.902805 | 1.834221 | Unclassified | chr5:112675552-112683522  | 5.971   |
| Aytl1b        | 0 | 0 | 0 | 8    | 0.133333  | 0.011105 | 0.997864 | Unclassified | chr5:107858567-107864058  | 3.492   |
| 4921517D22Rik | 0 | 0 | 0 | 14   | 0.233333  | 0.050927 | 1.16339  | Unclassified | chr13:59788762-59797462   | 6.701   |
| Prrg4         | 0 | 0 | 0 | 70   | 1.166667  | 1.87311  | 7.791554 | Unclassified | chr2:104670897-104692007  | 19.111  |
| Vire10        | 0 | 0 | 0 | 0    | 0         | 0.076975 | 0        | Unclassified | chr7:11030137-11033136    | 1       |
| 4921504E06Rik | 0 | 0 | 0 | 92   | 1.533333  | 0.169409 | 13.02357 | Stalled      | chr2:19384463-19477537    | 91.075  |
| 4931407G18Rik | 0 | 0 | 0 | 1    | 0.016667  | 0        | 1        | Unclassified | chr5:88406475-88410566    | 2.092   |
| Tmem41b       | 0 | 0 | 0 | 328  | 5.466667  | 5.09509  | 24.55225 | Unclassified | chr7:117115700-117131744  | 14.045  |
| 4930525F21Rik | 0 | 0 | 0 | 252  | 4.2       | 0        | 0.785302 | Unclassified | chr2:125809363-125973987  | 162.625 |
| Tmem59l       | 0 | 0 | 0 | 12   | 0.2       | 0.232711 | 2.301433 | Unclassified | chr8:73007769-73013257    | 3.489   |
| Hist1h2ba     | 0 | 0 | 0 | 6    | 0.1       | 0        | 4        | Unclassified | chr13:24025641-24028025   | 0.385   |
| Padi4         | 0 | 0 | 0 | 55   | 0.916667  | 0.131076 | 0.722245 | Unclassified | chr4:140301422-140332118  | 28.697  |
| Bbs4          | 0 | 0 | 0 | 224  | 3.733333  | 0.971245 | 18.9261  | Stalled      | chr9:59169772-59203315    | 31.544  |
| Pla2g2c       | 0 | 0 | 0 | 37   | 0.616667  | 0.039655 | 2.31746  | Unclassified | chr4:138279239-138300488  | 19.25   |
| Fndc3c1       | 0 | 0 | 0 | 15   | 0.25      | 0.052248 | 1.66316  | Unclassified | chrX:103615381-103682568  | 65.188  |
| Cd163         | 0 | 0 | 0 | 21   | 0.35      | 0.020371 | 0.566961 | Unclassified | chr6:124252668-124280543  | 25.876  |
| Olfr11        | 0 | 0 | 0 | 1    | 0.016667  | 0.054422 | 0        | Unclassified | chr13:21730448-21733390   | 0.943   |
| Per3          | 0 | 0 | 0 | 129  | 2.15      | 0.852376 | 14.27859 | Stalled      | chr4:150377763-150420731  | 40.969  |
| Lmod2         | 0 | 0 | 0 | 26   | 0.433333  | 0.032578 | 0.695933 | Unclassified | chr6:24545770-24555414    | 7.645   |
| Id4           | 0 | 0 | 0 | 8    | 0.133333  | 0.324054 | 0.892274 | Unclassified | chr13:48354795-48359405   | 2.611   |

|               |   |   |   |      |          |          |          |              |                           |          |
|---------------|---|---|---|------|----------|----------|----------|--------------|---------------------------|----------|
| Cml3          | 0 | 0 | 0 | 3    | 0.05     | 0.012945 | 0        | Unclassified | chr6:85710624-85717738    | 5.115    |
| Idi           | 0 | 0 | 0 | 23   | 0.383333 | 1.08327  | 18       | Unclassified | chr2:152560009-152563146  | 1.138    |
| Hpx           | 0 | 0 | 0 | 15   | 0.25     | 0.077937 | 0.73214  | Unclassified | chr7:112740124-112750630  | 8.507    |
| Ip6k2         | 0 | 0 | 0 | 201  | 3.35     | 8.65812  | 1.46327  | Elongating   | chr9:108696324-108708663  | 10.34    |
| Cd2ap         | 0 | 0 | 0 | 910  | 15.16667 | 4.41307  | 38.96014 | Unclassified | chr17:42929899-43015373   | 83.475   |
| Cd33          | 0 | 0 | 0 | 7    | 0.116667 | 0.08242  | 0.970876 | Unclassified | chr7:50782825-50790541    | 5.717    |
| Ss18          | 0 | 0 | 0 | 1316 | 21.93333 | 11.8358  | 20.16625 | Unclassified | chr18:14784139-14843423   | 57.285   |
| Prex2         | 0 | 0 | 0 | 164  | 2.733333 | 0        | 3.309144 | Unclassified | chr1:10981545-11293763    | 310.219  |
| Klf11         | 0 | 0 | 0 | 225  | 3.75     | 1.51737  | 13.09409 | Unclassified | chr12:25334235-25347645   | 11.411   |
| Luc713        | 0 | 0 | 0 | 1184 | 19.73333 | 24.5437  | 14.52904 | Unclassified | chr11:94152452-94185225   | 30.774   |
| Dyx1c1        | 0 | 0 | 0 | 190  | 3.166667 | 1.69694  | 11.16364 | Unclassified | chr9:72804591-72820874    | 14.284   |
| 2610029G23Rik | 0 | 0 | 0 | 131  | 2.183333 | 11.8203  | 17.71243 | Stalled      | chrX:102273113-102280525  | 5.413    |
| Psg28         | 0 | 0 | 0 | 3    | 0.05     | 0.004604 | 0.809868 | Unclassified | chr7:19007886-19019404    | 9.519    |
| Plcz1         | 0 | 0 | 0 | 34   | 0.566667 | 0.023495 | 0        | Unclassified | chr6:139938242-139991938  | 51.697   |
| Olfr527       | 0 | 0 | 0 | 3    | 0.05     | 0        | 2        | Unclassified | chr7:147519762-147522680  | 0.919    |
| Foxe1         | 0 | 0 | 0 | 10   | 0.166667 | 0.648787 | 4        | Unclassified | chr4:46355065-46358181    | 1.117    |
| Nkain3        | 0 | 0 | 0 | 275  | 4.583333 | 0.066544 | 4.014582 | Unclassified | chr4:20170999-20707815    | 534.817  |
| Frmf6         | 0 | 0 | 0 | 369  | 6.15     | 0.440755 | 53.47742 | Stalled      | chr12:71924500-72003221   | 76.722   |
| Spag8         | 0 | 0 | 0 | 24   | 0.4      | 0.061666 | 2.803922 | Unclassified | chr4:43664600-43668424    | 1.825    |
| Olfr1026      | 0 | 0 | 0 | 1    | 0.016667 | 0.041611 | 0        | Unclassified | chr2:85761426-85764350    | 0.925    |
| 4732471D19Rik | 0 | 0 | 0 | 588  | 9.8      | 1.50294  | 27.59321 | Unclassified | chr13:54603165-54652651   | 47.487   |
| Gpr142        | 0 | 0 | 0 | 20   | 0.333333 | 0.023345 | 0.286404 | Unclassified | chr11:114658237-114668059 | 7.823    |
| Chmp4c        | 0 | 0 | 0 | 30   | 0.5      | 0.250599 | 3.502585 | Unclassified | chr3:10364972-10391005    | 24.034   |
| Far2          | 0 | 0 | 0 | 231  | 3.85     | 5.82817  | 0        | Unclassified | chr6:147993937-148131282  | 135.346  |
| Ndufc1        | 0 | 0 | 0 | 294  | 4.9      | 25.3307  | 18.20861 | Stalled      | chr3:51209400-51214877    | 3.478    |
| Cd300e        | 0 | 0 | 0 | 16   | 0.266667 | 0.065759 | 0.412376 | Unclassified | chr11:114913230-114925352 | 10.123   |
| Dhrs7         | 0 | 0 | 0 | 156  | 2.6      | 10.3996  | 53.11393 | Stalled      | chr12:73751340-73767815   | 14.476   |
| 2310011J03Rik | 0 | 0 | 0 | 315  | 5.25     | 29.2294  | 7.075065 | Unclassified | chr10:79780999-79785293   | 2.295    |
| Gucy1b3       | 0 | 0 | 0 | 33   | 0.55     | 0.130599 | 0.565854 | Unclassified | chr3:81835926-81880633    | 42.708   |
| Fsd2          | 0 | 0 | 0 | 123  | 2.05     | 0.316005 | 0.207228 | Unclassified | chr7:88679239-88713867    | 32.629   |
| Rufy4         | 0 | 0 | 0 | 48   | 0.8      | 0.072252 | 2.881102 | Unclassified | chr1:74170114-74194797    | 22.684   |
| Col6a6        | 0 | 0 | 0 | 171  | 2.85     | 0.051839 | 0        | Unclassified | chr9:105591746-105732415  | 138.67   |
| 9230110C19Rik | 0 | 0 | 0 | 39   | 0.65     | 1.12706  | 8.127559 | Unclassified | chr9:8021671-8044823      | 21.153   |
| Pkd2          | 0 | 0 | 0 | 47   | 0.783333 | 0.221242 | 1.575795 | Unclassified | chr5:104886475-104934838  | 46.364   |
| Pabpc1l       | 0 | 0 | 0 | 166  | 2.766667 | 0.299447 | 1.539834 | Unclassified | chr2:163849185-163876274  | 25.09    |
| Tctn2         | 0 | 0 | 0 | 135  | 2.25     | 0.940246 | 5.716632 | Unclassified | chr5:125046757-125077658  | 28.902   |
| N28178        | 0 | 0 | 0 | 43   | 0.716667 | 0.098209 | 0.368667 | Unclassified | chr4:42928122-42954479    | 24.358   |
| Sv2b          | 0 | 0 | 0 | 174  | 2.9      | 0.234052 | 2.134498 | Unclassified | chr7:82259780-82456148    | 194.369  |
| Atp2b1        | 0 | 0 | 0 | 1610 | 26.83333 | 6.53313  | 23.69989 | Unclassified | chr10:98375785-98488775   | 110.991  |
| Ephx4         | 0 | 0 | 0 | 23   | 0.383333 | 0.652023 | 0.537037 | Unclassified | chr5:107830531-107859050  | 26.52    |
| Gltpd2        | 0 | 0 | 0 | 4    | 0.066667 | 0.042615 | 0.209174 | Unclassified | chr11:70330710-70334238   | 1.529    |
| Gm6880        | 0 | 0 | 0 | 1    | 0.016667 | 0        | 1        | Unclassified | chrX:71725625-71728738    | 1.114    |
| Fam193b       | 0 | 0 | 0 | 364  | 6.066667 | 14.1455  | 6.030894 | Unclassified | chr13:55640676-55674481   | 31.806   |
| Ddx58         | 0 | 0 | 0 | 512  | 8.533333 | 6.683    | 5.923248 | Unclassified | chr4:40150809-40188858    | 36.05    |
| Slc2a13       | 0 | 0 | 0 | 258  | 4.3      | 0.434874 | 13.00691 | Stalled      | chr15:91098121-91405692   | 305.572  |
| Pdzd11        | 0 | 0 | 0 | 234  | 3.9      | 11.5126  | 20.24918 | Stalled      | chrX:97818244-97823246    | 3.003    |
| Gpr120        | 0 | 0 | 0 | 28   | 0.466667 | 0.423224 | 2.6838   | Unclassified | chr19:38169568-38188753   | 17.186   |
| Tbr1          | 0 | 0 | 0 | 79   | 1.316667 | 0.560786 | 1.45276  | Unclassified | chr2:61640509-61652170    | 9.662    |
| Zbtb7c        | 0 | 0 | 0 | 411  | 6.85     | 0.09531  | 0        | Unclassified | chr18:75977831-76308218   | 328.388  |
| Gtppb10       | 0 | 0 | 0 | 287  | 4.783333 | 1.58265  | 24.90633 | Stalled      | chr5:5537456-5561501      | 22.046   |
| F730047E07Rik | 0 | 0 | 0 | 1076 | 17.93333 | 7.68949  | 43.71219 | Unclassified | chr4:24421608-24530093    | 106.486  |
| Stra6         | 0 | 0 | 0 | 34   | 0.566667 | 0.097828 | 0.449182 | Unclassified | chr9:57975155-58001803    | 24.649   |
| Macrold2      | 0 | 0 | 0 | 982  | 16.36667 | 0.203833 | 2.016053 | Unclassified | chr2:140219165-142215786  | 1994.622 |
| Pofr1e        | 0 | 0 | 0 | 380  | 6.333333 | 8.76576  | 6.784388 | Unclassified | chr4:45029496-45046564    | 15.069   |
| Scnn1b        | 0 | 0 | 0 | 108  | 1.8      | 0.069162 | 0.661675 | Unclassified | chr7:129006624-129062030  | 53.407   |
| Olfr901       | 0 | 0 | 0 | 1    | 0.016667 | 0        | 1        | Unclassified | chr9:38235868-38238804    | 0.937    |
| Gdap111       | 0 | 0 | 0 | 33   | 0.55     | 0.059611 | 0.723181 | Unclassified | chr2:163262202-163281060  | 16.859   |
| Igf13         | 0 | 0 | 0 | 6    | 0.1      | 0.044579 | 0        | Unclassified | chr7:18759842-18767211    | 5.37     |
| Tmem181a      | 0 | 0 | 0 | 23   | 0.383333 | 1.28667  | 4.091831 | Unclassified | chr17:6268474-6305783     | 35.31    |
| Ralgapb       | 0 | 0 | 0 | 470  | 7.833333 | 5.48516  | 32.0721  | Stalled      | chr2:158233588-158324989  | 89.402   |
| Rnf128        | 0 | 0 | 0 | 30   | 0.5      | 0.547266 | 9.523412 | Unclassified | chrX:136143158-136207683  | 62.526   |
| Gm5615        | 0 | 0 | 0 | 10   | 0.166667 | 0.038307 | 0.48753  | Unclassified | chr9:36339987-36351548    | 9.562    |
| Otor          | 0 | 0 | 0 | 1    | 0.016667 | 0.027983 | 1        | Unclassified | chr2:142902227-142907435  | 3.209    |
| Rsrc1         | 0 | 0 | 0 | 1004 | 16.73333 | 4.78044  | 26.2249  | Stalled      | chr3:66787593-67162325    | 372.733  |
| Bzw1          | 0 | 0 | 0 | 818  | 13.63333 | 38.0471  | 21.44291 | Unclassified | chr1:58447979-58463392    | 13.414   |
| Olfr597       | 0 | 0 | 0 | 1    | 0.016667 | 0.058698 | 0        | Unclassified | chr7:110466926-110469874  | 0.949    |
| Lonp2         | 0 | 0 | 0 | 552  | 9.2      | 12.7451  | 33.38967 | Stalled      | chr8:89145941-89240533    | 92.593   |
| Olfr517       | 0 | 0 | 0 | 0    | 0        | 0.040687 | 0        | Unclassified | chr7:116011721-116014666  | 0.946    |
| Cldn17        | 0 | 0 | 0 | 1    | 0.016667 | 0.021871 | 1        | Unclassified | chr16:88506051-88509223   | 1.173    |
| Psmb5         | 0 | 0 | 0 | 194  | 3.233333 | 93.4307  | 4.057079 | Unclassified | chr14:55232956-55238832   | 3.877    |
| Psmb4         | 0 | 0 | 0 | 401  | 6.683333 | 167.454  | 7.389125 | Unclassified | chr3:94688245-94692880    | 2.636    |
| Psmb7         | 0 | 0 | 0 | 1288 | 21.46667 | 100.008  | 6.673183 | Unclassified | chr2:38443565-38501426    | 55.862   |
| Psmb6         | 0 | 0 | 0 | 224  | 3.733333 | 75.5627  | 5.693316 | Unclassified | chr11:70336858-70341360   | 2.503    |
| Slc4a10       | 0 | 0 | 0 | 168  | 2.8      | 0.052051 | 0.625733 | Unclassified | chr2:61882596-62164800    | 280.205  |
| Cdcd132       | 0 | 0 | 0 | 476  | 7.933333 | 3.09443  | 12.03597 | Stalled      | chr6:3446392-3553530      | 105.139  |
| Htra1         | 0 | 0 | 0 | 62   | 1.033333 | 0.213815 | 0.44678  | Unclassified | chr7:138077716-138129171  | 49.456   |
| Pri2c5        | 0 | 0 | 0 | 1    | 0.016667 | 0.0592   | 0        | Unclassified | chr13:13273048-13284107   | 9.06     |
| Olig3         | 0 | 0 | 0 | 9    | 0.15     | 0.446476 | 1.043691 | Unclassified | chr10:19074344-19078410   | 2.067    |
| Srd5a2        | 0 | 0 | 0 | 37   | 0.616667 | 0.120059 | 1.878223 | Unclassified | chr17:74367045-74399256   | 30.212   |
| Stx1b         | 0 | 0 | 0 | 45   | 0.75     | 0.09771  | 0.279599 | Unclassified | chr7:134950357-134970045  | 17.689   |
| Ifne          | 0 | 0 | 0 | 1    | 0.016667 | 0.077207 | 1        | Unclassified | chr4:88525441-88528105    | 0.665    |
| Lsm6          | 0 | 0 | 0 | 451  | 7.516667 | 7.84264  | 11.89294 | Unclassified | chr8:81330349-81347039    | 14.691   |
| Kctd19        | 0 | 0 | 0 | 58   | 0.966667 | 0.050791 | 0.692765 | Unclassified | chr8:107906711-107939387  | 30.677   |
| Gnl3          | 0 | 0 | 0 | 1075 | 17.91667 | 0        | 5.811228 | Unclassified | chr14:31825618-31834275   | 6.658    |
| Ptprt         | 0 | 0 | 0 | 713  | 11.88333 | 0.023848 | 0        | Unclassified | chr2:161353358-162488883  | 1133.526 |
| Ptprz1        | 0 | 0 | 0 | 119  | 1.983333 | 0.020651 | 1.21075  | Unclassified | chr6:22823501-23002916    | 177.416  |

|               |   |   |   |      |           |          |          |              |                           |          |
|---------------|---|---|---|------|-----------|----------|----------|--------------|---------------------------|----------|
| Rnase11       | 0 | 0 | 0 | 3    | 0.05      | 0        | 1        | Unclassified | chr14:51669191-51671770   | 0.58     |
| Ptfr          | 0 | 0 | 0 | 42   | 0.7       | 0.681253 | 2.703652 | Unclassified | chr11:100818050-100833931 | 13.882   |
| Apba1         | 0 | 0 | 0 | 220  | 3.666667  | 0.185466 | 7.890269 | Unclassified | chr19:23831365-24024087   | 190.723  |
| Igdcc3        | 0 | 0 | 0 | 576  | 9.6       | 0.269883 | 0.142363 | Unclassified | chr9:64986995-65033677    | 44.683   |
| Pwpp2b        | 0 | 0 | 0 | 139  | 2.316667  | 0.572802 | 11.81095 | Stalled      | chr7:146432380-146453152  | 18.773   |
| Dand5         | 0 | 0 | 0 | 28   | 0.466667  | 0.857658 | 2.098039 | Unclassified | chr8:87339303-87348722    | 7.42     |
| Golga1        | 0 | 0 | 0 | 708  | 11.8      | 1.72688  | 36.93753 | Unclassified | chr2:38872022-38922926    | 48.905   |
| Ccdc144b      | 0 | 0 | 0 | 30   | 0.5       | 0        | 0.635344 | Unclassified | chr3:35906170-35954469    | 46.3     |
| Gm4979        | 0 | 0 | 0 | 17   | 0.283333  | 0.481432 | 1.994223 | Unclassified | chr2:150041834-150070609  | 26.776   |
| Slc10a6       | 0 | 0 | 0 | 27   | 0.45      | 0.042238 | 0        | Unclassified | chr5:104034729-104060422  | 23.694   |
| Tsks          | 0 | 0 | 0 | 29   | 0.483333  | 0.351132 | 0        | Unclassified | chr7:52196609-52213405    | 14.797   |
| Slc38a4       | 0 | 0 | 0 | 66   | 1.1       | 0.052152 | 0.968865 | Unclassified | chr15:96825253-96888387   | 61.135   |
| Gm4952        | 0 | 0 | 0 | 17   | 0.283333  | 0.050791 | 0        | Unclassified | chr19:12672505-12702105   | 27.601   |
| Tnmd          | 0 | 0 | 0 | 7    | 0.116667  | 0.019345 | 0.693424 | Unclassified | chrX:130383546-130400116  | 14.571   |
| Necab1        | 0 | 0 | 0 | 93   | 1.55      | 0.01563  | 1.370378 | Unclassified | chr4:14879393-15078278    | 196.886  |
| Cep55         | 0 | 0 | 0 | 534  | 8.9       | 13.0305  | 15.48499 | Unclassified | chr19:38127531-38148915   | 19.385   |
| Kif26a        | 0 | 0 | 0 | 81   | 1.35      | 0.087997 | 2.357954 | Unclassified | chr12:113382418-113419958 | 35.541   |
| Ccdc11        | 0 | 0 | 0 | 334  | 5.566667  | 0.096152 | 18.35023 | Stalled      | chr18:74440753-74519638   | 76.886   |
| Arpp21        | 0 | 0 | 0 | 121  | 2.016667  | 0.637585 | 1.522914 | Unclassified | chr9:111967761-112092421  | 122.661  |
| Phlda2        | 0 | 0 | 0 | 10   | 0.166667  | 1.1247   | 7        | Unclassified | chr7:150687452-150690429  | 0.978    |
| Olf1371       | 0 | 0 | 0 | 0    | 0         | 0.005632 | 0        | Unclassified | chr11:52026553-52029489   | 0.937    |
| Parn          | 0 | 0 | 0 | 1028 | 17.133333 | 7.63481  | 39.23042 | Unclassified | chr16:13538056-13670263   | 130.208  |
| Prkcc         | 0 | 0 | 0 | 255  | 4.25      | 0.224373 | 6.342162 | Unclassified | chr2:11092008-11222853    | 128.846  |
| Golt1a        | 0 | 0 | 0 | 35   | 0.583333  | 0.104367 | 0.867551 | Unclassified | chr1:135204399-135219603  | 13.205   |
| Tsyp11        | 0 | 0 | 0 | 231  | 3.85      | 20.5394  | 16.28334 | Stalled      | chr10:33999995-34004691   | 2.697    |
| Commd2        | 0 | 0 | 0 | 181  | 3.016667  | 5.44382  | 18.59922 | Stalled      | chr3:57448270-57457606    | 7.337    |
| Mrgprb8       | 0 | 0 | 0 | 2    | 0.033333  | 0        | 1        | Unclassified | chr7:55641895-55645018    | 1.124    |
| Mrgprx1       | 0 | 0 | 0 | 6    | 0.1       | 0.032558 | 0        | Unclassified | chr7:55276340-55284967    | 6.628    |
| Tmem56        | 0 | 0 | 0 | 85   | 1.416667  | 0.096813 | 2.212196 | Unclassified | chr3:120904927-120968234  | 61.308   |
| Arid3c        | 0 | 0 | 0 | 20   | 0.333333  | 0.175666 | 0.296039 | Unclassified | chr4:41670867-41680174    | 7.308    |
| Trim10        | 0 | 0 | 0 | 8    | 0.133333  | 0.776935 | 0        | Unclassified | chr17:37004518-37014776   | 8.259    |
| Eif3e         | 0 | 0 | 0 | 567  | 9.45      | 48.8406  | 13.4643  | Unclassified | chr15:43081585-43116282   | 32.698   |
| Rlim          | 0 | 0 | 0 | 860  | 14.333333 | 3.59509  | 9.992087 | Unclassified | chrX:101152505-101178623  | 24.119   |
| Rnf7          | 0 | 0 | 0 | 269  | 4.483333  | 23.2612  | 8.923417 | Unclassified | chr9:96371375-96381014    | 7.64     |
| Gm5069        | 0 | 0 | 0 | 207  | 3.45      | 0.494199 | 28.86202 | Stalled      | chr1:182257099-182262680  | 3.582    |
| Cyp2j7        | 0 | 0 | 0 | 8    | 0.133333  | 0        | 0        | Unclassified | chr4:95861887-95905350    | 41.464   |
| Gbgt1         | 0 | 0 | 0 | 15   | 0.25      | 0.019201 | 1.288257 | Unclassified | chr2:28350410-28360935    | 8.526    |
| Pibf1         | 0 | 0 | 0 | 819  | 13.65     | 3.6045   | 54.90368 | Stalled      | chr14:99496651-99653712   | 155.062  |
| Ankrd22       | 0 | 0 | 0 | 27   | 0.45      | 0        | 0.639065 | Unclassified | chr19:34197038-34242531   | 43.494   |
| Lgals12       | 0 | 0 | 0 | 23   | 0.383333  | 0.032564 | 0.322424 | Unclassified | chr19:7671150-7683666     | 10.517   |
| Bbs1          | 0 | 0 | 0 | 233  | 3.883333  | 0.45349  | 9.910745 | Unclassified | chr19:4886883-4908627     | 19.745   |
| Fam83h        | 0 | 0 | 0 | 55   | 0.916667  | 0.163949 | 0        | Unclassified | chr15:75831522-75846766   | 13.245   |
| Astn2         | 0 | 0 | 0 | 677  | 11.283333 | 0.030156 | 0.602399 | Unclassified | chr4:65041836-66067517    | 1023.882 |
| Cbfb          | 0 | 0 | 0 | 866  | 14.433333 | 21.0875  | 21.46682 | Unclassified | chr8:107692573-107741881  | 47.309   |
| Mtx2          | 0 | 0 | 0 | 263  | 4.383333  | 12.2232  | 34.30976 | Stalled      | chr2:74661868-74714805    | 50.938   |
| Nars          | 0 | 0 | 0 | 660  | 11        | 52.6     | 12.78875 | Unclassified | chr18:64659306-64678211   | 16.906   |
| Sdcbp         | 0 | 0 | 0 | 488  | 8.133333  | 7.77562  | 16.85362 | Unclassified | chr4:6290826-6323269      | 30.444   |
| Gm6981        | 0 | 0 | 0 | 300  | 5         | 0.414965 | 61.88113 | Stalled      | chr9:51810165-51858810    | 46.646   |
| Zfp619        | 0 | 0 | 0 | 344  | 5.733333  | 0.802828 | 78.24199 | Stalled      | chr7:46771135-46795785    | 22.651   |
| Agt           | 0 | 0 | 0 | 47   | 0.783333  | 0.013938 | 1.162849 | Unclassified | chr8:127080486-127095607  | 13.122   |
| C79407        | 0 | 0 | 0 | 277  | 4.616667  | 3.58881  | 24.29924 | Stalled      | chr12:66233720-66275567   | 39.848   |
| Ppp1r1c       | 0 | 0 | 0 | 81   | 1.35      | 0.019389 | 0        | Unclassified | chr2:79545936-79650470    | 102.535  |
| Tmco5b        | 0 | 0 | 0 | 6    | 0.1       | 0.072526 | 0        | Unclassified | chr2:113123888-113137347  | 11.46    |
| Asb18         | 0 | 0 | 0 | 72   | 1.2       | 0.200826 | 1.406479 | Unclassified | chr1:91849252-91913152    | 61.901   |
| Pelp1         | 0 | 0 | 0 | 593  | 9.883333  | 16.7594  | 9.809787 | Unclassified | chr11:70206383-70225533   | 17.151   |
| 7420426K07Rik | 0 | 0 | 0 | 1    | 0.016667  | 0.042608 | 0        | Unclassified | chr9:98801537-98805041    | 1.505    |
| Gtf2i         | 0 | 0 | 0 | 1223 | 20.383333 | 15.7656  | 16.6739  | Unclassified | chr5:134713703-134792616  | 76.914   |
| Taf3          | 0 | 0 | 0 | 850  | 14.166667 | 5.25714  | 28.92351 | Unclassified | chr2:9836179-9972236      | 134.058  |
| Serpinh1      | 0 | 0 | 0 | 25   | 0.416667  | 0.171325 | 1.3806   | Unclassified | chr7:106493884-106503749  | 7.866    |
| Prickle2      | 0 | 0 | 0 | 238  | 3.966667  | 0.052902 | 1.770956 | Unclassified | chr6:92320885-92658178    | 335.294  |
| Gm5468        | 0 | 0 | 0 | 47   | 0.783333  | 0.289057 | 5.377593 | Unclassified | chr15:25341946-25382173   | 38.228   |
| Imp3          | 0 | 0 | 0 | 198  | 3.3       | 58.5872  | 177      | Unclassified | chr9:56783306-56786205    | 0.95     |
| Olf1165       | 0 | 0 | 0 | 3    | 0.05      | 0.026982 | 0        | Unclassified | chr2:87941192-87944142    | 0.951    |
| Vsnl1         | 0 | 0 | 0 | 91   | 1.516667  | 0.039761 | 0        | Unclassified | chr12:11332052-11445455   | 111.404  |
| D14Ert668e    | 0 | 0 | 0 | 39   | 0.65      | 0.959827 | 1.721956 | Unclassified | chr14:59967569-59986327   | 16.759   |
| Acs11         | 0 | 0 | 0 | 919  | 15.31667  | 3.89447  | 15.71051 | Unclassified | chr8:47554395-47621404    | 65.01    |
| Flrt2         | 0 | 0 | 0 | 56   | 0.933333  | 0.036078 | 0.630104 | Unclassified | chr12:96928435-97023421   | 92.987   |
| Glis3         | 0 | 0 | 0 | 367  | 6.116667  | 0.350101 | 3.23542  | Unclassified | chr19:28336937-28756567   | 417.631  |
| Shisa2        | 0 | 0 | 0 | 11   | 0.183333  | 0.24662  | 0.402048 | Unclassified | chr14:60242117-60250495   | 6.379    |
| Fap           | 0 | 0 | 0 | 81   | 1.35      | 0.047556 | 1.440811 | Unclassified | chr2:62339001-62414078    | 73.078   |
| Pkia          | 0 | 0 | 0 | 35   | 0.583333  | 0.031327 | 0.72837  | Unclassified | chr3:7364603-7445365      | 78.763   |
| Exoc3         | 0 | 0 | 0 | 492  | 8.2       | 4.8653   | 38.51674 | Unclassified | chr13:74307252-74348148   | 38.897   |
| Tas2r125      | 0 | 0 | 0 | 0    | 0         | 0        | 0        | Unclassified | chr6:132857668-132860604  | 0.937    |
| Tmem178       | 0 | 0 | 0 | 57   | 0.95      | 0.136022 | 1.529759 | Unclassified | chr17:81341971-81401156   | 57.186   |
| 2810417H13Rik | 0 | 0 | 0 | 563  | 9.383333  | 48.0493  | 5.558648 | Unclassified | chr9:65736129-65751358    | 13.23    |
| Bphl          | 0 | 0 | 0 | 332  | 5.533333  | 4.01651  | 25.25839 | Stalled      | chr13:34127509-34165943   | 36.435   |
| My19          | 0 | 0 | 0 | 17   | 0.283333  | 0.091176 | 0.604245 | Unclassified | chr2:156599199-156607393  | 6.195    |
| Cgn           | 0 | 0 | 0 | 25   | 0.416667  | 0.315286 | 6.291443 | Unclassified | chr3:94563991-94592437    | 26.447   |
| Ric3          | 0 | 0 | 0 | 31   | 0.516667  | 0.265569 | 1.246822 | Unclassified | chr7:116177832-116228838  | 49.007   |
| Kcnh4         | 0 | 0 | 0 | 89   | 1.483333  | 0.257478 | 3.579101 | Unclassified | chr11:100601692-100623092 | 19.401   |
| Elf3          | 0 | 0 | 0 | 15   | 0.25      | 0.07267  | 1.788991 | Unclassified | chr1:137150150-137157049  | 4.9      |
| Pkdrej        | 0 | 0 | 0 | 12   | 0.2       | 0.167059 | 2.739398 | Unclassified | chr15:85645105-85654163   | 7.059    |
| Taf51         | 0 | 0 | 0 | 1106 | 18.433333 | 12.3019  | 12.6042  | Unclassified | chr8:126520215-126547209  | 24.995   |
| Cbln1         | 0 | 0 | 0 | 18   | 0.3       | 0.214063 | 0.199476 | Unclassified | chr8:89992751-89998491    | 3.741    |
| Nipbl         | 0 | 0 | 0 | 1403 | 23.383333 | 8.628    | 25.6698  | Unclassified | chr15:8241224-8396463     | 153.24   |
| Gm5077        | 0 | 0 | 0 | 10   | 0.166667  | 0.072173 | 0        | Unclassified | chr6:124574642-124588103  | 11.462   |



|               |   |   |   |      |          |          |          |              |                           |         |
|---------------|---|---|---|------|----------|----------|----------|--------------|---------------------------|---------|
| 1700123L14Rik | 0 | 0 | 0 | 0    | 0        | 0.05268  | 0        | Unclassified | chr6:96114496-96118199    | 1.704   |
| Rgs20         | 0 | 0 | 0 | 99   | 1.65     | 0.041559 | 1.606802 | Unclassified | chr1:4900049-5011460      | 109.412 |
| Kcns3         | 0 | 0 | 0 | 34   | 0.566667 | 0.017479 | 1.342202 | Unclassified | chr12:11097007-11159179   | 60.173  |
| Olfr61        | 0 | 0 | 0 | 1    | 0.016667 | 0.034215 | 0        | Unclassified | chr7:147821601-147824537  | 0.937   |
| AI747699      | 0 | 0 | 0 | 70   | 1.166667 | 2.09037  | 5.102079 | Unclassified | chr19:33629770-33666801   | 35.032  |
| AI314180      | 0 | 0 | 0 | 1532 | 25.53333 | 9.98233  | 20.98606 | Unclassified | chr4:58812902-58927597    | 112.696 |
| Ifi2712b      | 0 | 0 | 0 | 8    | 0.133333 | 1.77445  | 0        | Unclassified | chr12:104689107-104697433 | 6.327   |
| Aff2          | 0 | 0 | 0 | 100  | 1.666667 | 0.025713 | 0.836555 | Unclassified | chrX:66611505-67121212    | 507.708 |
| Serpina10     | 0 | 0 | 0 | 3    | 0.05     | 0        | 0        | Unclassified | chr12:104854884-104871615 | 14.732  |
| Fmn1          | 0 | 0 | 0 | 277  | 4.616667 | 0.055887 | 0.584358 | Unclassified | chr2:113165892-113556924  | 389.033 |
| 6430704M03Rik | 0 | 0 | 0 | 30   | 0.5      | 0.156297 | 0.502206 | Unclassified | chr4:56973007-57005263    | 30.257  |
| Unc79         | 0 | 0 | 0 | 160  | 2.666667 | 0.036326 | 0        | Unclassified | chr12:104238098-104422208 | 182.111 |
| Wdyhv1        | 0 | 0 | 0 | 343  | 5.716667 | 7.57783  | 10.13654 | Unclassified | chr15:57970990-57990209   | 17.22   |
| 2010005H15Rik | 0 | 0 | 0 | 11   | 0.183333 | 0        | 0        | Unclassified | chr16:36219647-36257513   | 35.867  |
| Olfr68        | 0 | 0 | 0 | 1    | 0.016667 | 0.074276 | 1        | Unclassified | chr7:110925909-110928857  | 0.949   |
| Fcgrt         | 0 | 0 | 0 | 56   | 0.933333 | 2.3667   | 1.860839 | Unclassified | chr7:52348362-52361192    | 10.831  |
| Rpsa          | 0 | 0 | 0 | 1326 | 22.1     | 0        | 2.286596 | Elongating   | chr9:120034883-120041487  | 4.605   |
| Npy2r         | 0 | 0 | 0 | 12   | 0.2      | 0.02288  | 0.465355 | Unclassified | chr3:82342304-82354007    | 9.704   |
| Cadm2         | 0 | 0 | 0 | 369  | 6.15     | 0.098344 | 3.632753 | Unclassified | chr16:66655669-67623153   | 965.485 |
| Olfr553       | 0 | 0 | 0 | 2    | 0.033333 | 0.032646 | 0        | Unclassified | chr7:109762520-109765501  | 0.982   |
| Nptx1         | 0 | 0 | 0 | 27   | 0.45     | 0.126126 | 3.507337 | Unclassified | chr11:119400032-119411134 | 9.103   |
| Ctnd2         | 0 | 0 | 0 | 516  | 8.6      | 0.075441 | 1.875618 | Unclassified | chr15:30100347-30959098   | 856.752 |
| Npr3          | 0 | 0 | 0 | 72   | 1.2      | 0.040723 | 3.114899 | Unclassified | chr15:11769651-11837429   | 65.779  |
| Trim55        | 0 | 0 | 0 | 42   | 0.7      | 0.136268 | 1.645131 | Unclassified | chr3:19542459-19591599    | 47.141  |
| Npr1          | 0 | 0 | 0 | 48   | 0.8      | 0.917303 | 2.36573  | Unclassified | chr3:90254513-90271788    | 15.276  |
| Olfr784       | 0 | 0 | 0 | 1    | 0.016667 | 0.018842 | 1        | Unclassified | chr10:128822690-128825650 | 0.961   |
| Olfr1095      | 0 | 0 | 0 | 0    | 0        | 0.041477 | 0        | Unclassified | chr2:86690926-86693853    | 0.928   |
| Olfr599       | 0 | 0 | 0 | 0    | 0        | 0.054077 | 0        | Unclassified | chr7:110484569-110487517  | 0.949   |
| Olfr516       | 0 | 0 | 0 | 0    | 0        | 0        | 0        | Unclassified | chr7:115988577-115991522  | 0.946   |
| Olfr514       | 0 | 0 | 0 | 0    | 0        | 0.027473 | 0        | Unclassified | chr7:115968578-115971511  | 0.934   |
| Npy6r         | 0 | 0 | 0 | 4    | 0.066667 | 0.014978 | 0        | Unclassified | chr18:44427780-44437354   | 7.575   |
| Olfr781       | 0 | 0 | 0 | 2    | 0.033333 | 0        | 2        | Unclassified | chr10:128767938-128770874 | 0.937   |
| Gpr128        | 0 | 0 | 0 | 45   | 0.75     | 0.109136 | 1.240625 | Unclassified | chr16:56724721-56797971   | 71.251  |
| Zpld1         | 0 | 0 | 0 | 28   | 0.466667 | 0        | 0        | Unclassified | chr16:55225287-55285350   | 58.064  |
| Lbxcor1       | 0 | 0 | 0 | 34   | 0.566667 | 0.207838 | 0.604204 | Unclassified | chr9:62985970-62996787    | 8.818   |
| Chchd10       | 0 | 0 | 0 | 153  | 2.55     | 47.8348  | 3.009783 | Unclassified | chr10:75396317-75400479   | 2.163   |
| Pdzd2         | 0 | 0 | 0 | 417  | 6.95     | 0.311471 | 2.550921 | Unclassified | chr15:12286808-12524311   | 235.504 |
| Camk1         | 0 | 0 | 0 | 98   | 1.633333 | 0.483698 | 1.288288 | Unclassified | chr6:113284117-113295916  | 9.8     |
| Dbr1          | 0 | 0 | 0 | 340  | 5.666667 | 13.3175  | 13.85585 | Unclassified | chr9:99474217-99484762    | 8.546   |
| Akr1c6        | 0 | 0 | 0 | 8    | 0.133333 | 0.018861 | 0        | Unclassified | chr13:4431588-4456776     | 23.189  |
| Srrt          | 0 | 0 | 0 | 1172 | 19.53333 | 88.8958  | 5.369166 | Unclassified | chr5:137736931-137750902  | 11.972  |
| N6amt1        | 0 | 0 | 0 | 337  | 5.616667 | 4.50853  | 25.44951 | Unclassified | chr16:87352429-87368894   | 14.466  |
| Slc38a2       | 0 | 0 | 0 | 1431 | 23.85    | 15.4027  | 3.884632 | Unclassified | chr15:96517822-96532129   | 12.308  |
| Gm14374       | 0 | 0 | 0 | 0    | 0        | 0        | 0        | Unclassified | chrX:5244184-5248144      | 1.961   |
| Gm5634        | 0 | 0 | 0 | 0    | 0        | 0        | 0        | Unclassified | chrX:8539259-8542101      | 0.843   |
| Olfr161       | 0 | 0 | 0 | 1    | 0.016667 | 0.054422 | 0        | Unclassified | chr16:3590397-3593339     | 0.943   |
| Dnajc15       | 0 | 0 | 0 | 200  | 3.333333 | 20.8837  | 15.15556 | Stalled      | chr14:78226023-78276724   | 48.702  |
| Ndufa7        | 0 | 0 | 0 | 661  | 11.01667 | 61.1662  | 27.81078 | Unclassified | chr17:33959558-33975258   | 13.701  |
| Stxbp6        | 0 | 0 | 0 | 127  | 2.116667 | 0.04445  | 0.640579 | Unclassified | chr12:45953472-46177470   | 221.999 |
| Olfr1339      | 0 | 0 | 0 | 0    | 0        | 0        | 0        | Unclassified | chr4:118405135-118408083  | 0.949   |
| Gm5635        | 0 | 0 | 0 | 1    | 0.016667 | 0.034928 | 0        | Unclassified | chrX:8638215-8640948      | 0.734   |
| Cox7b         | 0 | 0 | 0 | 156  | 2.6      | 59.4933  | 7.582934 | Unclassified | chrX:103209038-103217789  | 6.752   |
| Eef1e1        | 0 | 0 | 0 | 570  | 9.5      | 26.4687  | 10.30476 | Unclassified | chr13:38737559-38752897   | 13.339  |
| Eif4e2        | 0 | 0 | 0 | 1169 | 19.48333 | 42.5318  | 15.74574 | Unclassified | chr1:89108488-89137063    | 26.576  |
| Pdcd6ip       | 0 | 0 | 0 | 822  | 13.7     | 14.9923  | 18.80682 | Unclassified | chr9:113560862-113619377  | 56.516  |
| Nedd4         | 0 | 0 | 0 | 908  | 15.13333 | 7.72055  | 24.27096 | Unclassified | chr9:72508153-72597655    | 87.503  |
| Tarsi2        | 0 | 0 | 0 | 304  | 5.066667 | 2.14241  | 21.13995 | Stalled      | chr7:72787783-72836979    | 47.197  |
| C78339        | 0 | 0 | 0 | 294  | 4.9      | 6.01297  | 5.99203  | Unclassified | chr13:46762890-46771142   | 6.253   |
| Olfr267       | 0 | 0 | 0 | 4    | 0.066667 | 0        | 2        | Unclassified | chr4:58797651-58800592    | 0.942   |
| Emcn          | 0 | 0 | 0 | 42   | 0.7      | 0.043892 | 0.695293 | Unclassified | chr3:137002041-137094032  | 89.992  |
| Olfr1         | 0 | 0 | 0 | 2    | 0.033333 | 0.013562 | 1        | Unclassified | chr11:73208577-73211522   | 0.946   |
| Olfr1180      | 0 | 0 | 0 | 0    | 0        | 0        | 0        | Unclassified | chr2:88251883-88254813    | 0.931   |
| 4930595M18Rik | 0 | 0 | 0 | 5    | 0.083333 | 0.009691 | 0.903728 | Unclassified | chrX:78664913-78705461    | 38.549  |
| Apob48r       | 0 | 0 | 0 | 32   | 0.533333 | 0.662262 | 2.045605 | Unclassified | chr7:133726521-133732606  | 4.086   |
| Steap4        | 0 | 0 | 0 | 35   | 0.583333 | 0.407936 | 5.338254 | Unclassified | chr5:7958471-7982213      | 21.743  |
| Ugt2b1        | 0 | 0 | 0 | 6    | 0.1      | 0.015108 | 0        | Unclassified | chr5:87345663-87357528    | 9.866   |
| Dppa2         | 0 | 0 | 0 | 6    | 0.1      | 0.051824 | 0        | Unclassified | chr16:48308386-48319626   | 9.241   |
| Crelid1       | 0 | 0 | 0 | 311  | 5.183333 | 6.95583  | 19.37988 | Stalled      | chr6:113431562-113443332  | 9.771   |
| Gucy2g        | 0 | 0 | 0 | 90   | 1.5      | 0.052769 | 0.652594 | Unclassified | chr19:55272590-55317726   | 43.137  |
| Ofd1          | 0 | 0 | 0 | 395  | 6.583333 | 2.85495  | 53.57823 | Stalled      | chrX:162827964-162880636  | 50.673  |
| Pcdh21        | 0 | 0 | 0 | 25   | 0.416667 | 0.023822 | 0.986418 | Unclassified | chr14:37891034-37913497   | 20.464  |
| Ankfn1        | 0 | 0 | 0 | 112  | 1.866667 | 0        | 0.516568 | Unclassified | chr11:89282399-89401869   | 117.471 |
| Slc13a1       | 0 | 0 | 0 | 44   | 0.733333 | 0.066778 | 0.65235  | Unclassified | chr6:24038282-24120092    | 79.811  |
| Ddx3x         | 0 | 0 | 0 | 968  | 16.13333 | 35.1724  | 19.43299 | Unclassified | chrX:12856147-12871109    | 12.963  |
| Pcf11         | 0 | 0 | 0 | 1132 | 18.86667 | 7.65518  | 9.227608 | Unclassified | chr7:99792223-99820422    | 26.2    |
| Lrit2         | 0 | 0 | 0 | 3    | 0.05     | 0.033208 | 0        | Unclassified | chr14:37879234-37886921   | 5.688   |
| Gga1          | 0 | 0 | 0 | 853  | 14.21667 | 17.8836  | 9.914393 | Unclassified | chr15:78705619-78725014   | 17.396  |
| Centpe        | 0 | 0 | 0 | 600  | 10       | 6.30134  | 11.88519 | Unclassified | chr3:134873526-134936504  | 60.979  |
| 1700127D06Rik | 0 | 0 | 0 | 0    | 0        | 0.486334 | 0        | Unclassified | chr7:51198381-51201297    | 0.917   |
| Mfap3l        | 0 | 0 | 0 | 44   | 0.733333 | 0.230431 | 3.290891 | Unclassified | chr8:63109675-63151546    | 39.872  |
| Slc16a10      | 0 | 0 | 0 | 329  | 5.483333 | 1.6025   | 38.67703 | Stalled      | chr10:39753340-39864060   | 108.721 |
| Fbxw17        | 0 | 0 | 0 | 265  | 4.416667 | 3.40193  | 12.7755  | Unclassified | chr13:50511245-50529138   | 15.894  |
| Lrit1         | 0 | 0 | 0 | 10   | 0.166667 | 0.017813 | 1.064874 | Unclassified | chr14:37866015-37878124   | 10.11   |
| 4930596D02Rik | 0 | 0 | 0 | 3    | 0.05     | 0        | 0        | Unclassified | chr14:36622671-36627164   | 2.494   |
| Cma2          | 0 | 0 | 0 | 1    | 0.016667 | 0.087856 | 0        | Unclassified | chr14:56588264-56592832   | 2.569   |
| V1rb2         | 0 | 0 | 0 | 1    | 0.016667 | 0.013737 | 0        | Unclassified | chr6:90022079-90025012    | 0.934   |

|               |   |   |   |      |           |          |          |              |                           |          |
|---------------|---|---|---|------|-----------|----------|----------|--------------|---------------------------|----------|
| Lce3a         | 0 | 0 | 0 | 0    | 0         | 0.023345 | 0        | Unclassified | chr3:92729208-92732152    | 0.945    |
| Ttc30a2       | 0 | 0 | 0 | 6    | 0.1       | 1.28472  | 3        | Unclassified | chr2:75814228-75818236    | 2.009    |
| 6030429G01Rik | 0 | 0 | 0 | 155  | 2.583333  | 2.32975  | 0.269451 | Unclassified | chr7:4474558-4486044      | 9.487    |
| Klk1b27       | 0 | 0 | 0 | 3    | 0.05      | 0.013136 | 0        | Unclassified | chr7:51305659-51312081    | 4.423    |
| Lamp1         | 0 | 0 | 0 | 428  | 7.133333  | 43.3821  | 7.217091 | Unclassified | chr8:13157134-13175338    | 16.205   |
| Adcy5         | 0 | 0 | 0 | 219  | 3.65      | 0.12404  | 2.900985 | Unclassified | chr16:35153721-35304635   | 148.915  |
| Olfir1065     | 0 | 0 | 0 | 0    | 0         | 0        | 0        | Unclassified | chr2:86285169-86288161    | 0.993    |
| Zfp81         | 0 | 0 | 0 | 248  | 4.133333  | 4.31822  | 50.74185 | Stalled      | chr17:33470672-33497823   | 25.152   |
| Prok2         | 0 | 0 | 0 | 13   | 0.216667  | 0.061872 | 0.540124 | Unclassified | chr6:99661293-99678386    | 15.094   |
| Ttpa          | 0 | 0 | 0 | 12   | 0.2       | 0.092355 | 2.259494 | Unclassified | chr4:19933574-19957932    | 22.359   |
| Olfir1037     | 0 | 0 | 0 | 0    | 0         | 0        | 0        | Unclassified | chr2:85924966-85927932    | 0.967    |
| Kpna3         | 0 | 0 | 0 | 615  | 10.25     | 7.42698  | 25.89683 | Unclassified | chr14:61984022-62060784   | 74.763   |
| Rab7          | 0 | 0 | 0 | 325  | 5.416667  | 42.9479  | 0.982995 | Unclassified | chr6:87950428-87965684    | 13.257   |
| Dennd5a       | 0 | 0 | 0 | 536  | 8.933333  | 9.93836  | 12.21535 | Unclassified | chr7:117037294-117105936  | 66.643   |
| Kng1          | 0 | 0 | 0 | 20   | 0.333333  | 0.080021 | 0.545237 | Unclassified | chr16:23056372-23082151   | 23.78    |
| 4930404A10Rik | 0 | 0 | 0 | 40   | 0.666667  | 0.036671 | 3.752681 | Unclassified | chr11:54182153-54240257   | 56.105   |
| Kpna1         | 0 | 0 | 0 | 874  | 14.566667 | 4.72858  | 34.12559 | Unclassified | chr16:35981448-36036248   | 52.801   |
| Kpna2         | 0 | 0 | 0 | 937  | 15.616667 | 13.7888  | 10.32573 | Unclassified | chr11:106849942-106862839 | 10.898   |
| Cldn2         | 0 | 0 | 0 | 5    | 0.083333  | 0.126394 | 0.704971 | Unclassified | chrX:136333366-136345923  | 10.558   |
| Cldn3         | 0 | 0 | 0 | 4    | 0.066667  | 0.197622 | 3        | Unclassified | chr5:135460083-135463342  | 1.26     |
| Clcnka        | 0 | 0 | 0 | 37   | 0.616667  | 0.042632 | 0.568237 | Unclassified | chr4:140940525-140956621  | 14.097   |
| Serpinb8      | 0 | 0 | 0 | 14   | 0.233333  | 0.087526 | 0.599653 | Unclassified | chr1:109484582-109505555  | 18.974   |
| Cldn1         | 0 | 0 | 0 | 12   | 0.2       | 0.039606 | 1.223803 | Unclassified | chr16:26356736-26373925   | 15.19    |
| Etd           | 0 | 0 | 0 | 2    | 0.033333  | 0        | 0        | Unclassified | chrX:50786094-50796753    | 8.66     |
| Defb38        | 0 | 0 | 0 | 3    | 0.05      | 0        | 0.508237 | Unclassified | chr8:19023463-19028529    | 3.067    |
| C1qtnf3       | 0 | 0 | 0 | 26   | 0.433333  | 0.03877  | 1.076231 | Unclassified | chr15:10880110-10909905   | 27.796   |
| Dcun1d4       | 0 | 0 | 0 | 257  | 4.283333  | 0.974534 | 14.38425 | Stalled      | chr5:73880320-73952025    | 69.706   |
| Smarce1       | 0 | 0 | 0 | 681  | 11.35     | 21.7874  | 9.665765 | Unclassified | chr11:99070363-99094331   | 21.969   |
| Klk1b24       | 0 | 0 | 0 | 5    | 0.083333  | 0.01066  | 0        | Unclassified | chr7:51441632-51447821    | 4.19     |
| D10627        | 0 | 0 | 0 | 334  | 5.666667  | 2.77227  | 16.50575 | Unclassified | chr8:71730944-71754438    | 21.495   |
| Olfir628      | 0 | 0 | 0 | 0    | 0         | 0.020167 | 0        | Unclassified | chr7:110878441-110881392  | 0.952    |
| Nptx2         | 0 | 0 | 0 | 23   | 0.383333  | 0.035168 | 3.015126 | Unclassified | chr5:145304755-145318347  | 11.593   |
| Rbm11         | 0 | 0 | 0 | 11   | 0.183333  | 0.583939 | 2.564868 | Unclassified | chr16:75591135-75603070   | 9.936    |
| C2cd2l        | 0 | 0 | 0 | 241  | 4.016667  | 5.39874  | 9.95789  | Unclassified | chr9:44117319-44130365    | 11.047   |
| Mrrf          | 0 | 0 | 0 | 474  | 7.9       | 5.3289   | 36.21713 | Stalled      | chr2:35989917-36045801    | 53.885   |
| Zkscan16      | 0 | 0 | 0 | 25   | 0.416667  | 0.197245 | 4.156245 | Unclassified | chr4:58954499-58971227    | 14.729   |
| Olfir340      | 0 | 0 | 0 | 3    | 0.05      | 0.087508 | 3        | Unclassified | chr2:36306106-36309045    | 0.94     |
| Spcs3         | 0 | 0 | 0 | 594  | 9.9       | 29.0074  | 18.93882 | Unclassified | chr8:55605786-55617351    | 9.566    |
| Tdgf1         | 0 | 0 | 0 | 14   | 0.233333  | 0.046509 | 0        | Unclassified | chr9:110842111-110850662  | 6.552    |
| Tmem51        | 0 | 0 | 0 | 121  | 2.016667  | 0.427924 | 3.22297  | Unclassified | chr4:141586907-141642219  | 53.313   |
| Spata19       | 0 | 0 | 0 | 1    | 0.016667  | 0        | 1        | Unclassified | chr9:27202405-27209295    | 4.891    |
| Ccr1          | 0 | 0 | 0 | 12   | 0.2       | 0.081489 | 1.443983 | Unclassified | chr9:123876958-123885525  | 6.568    |
| Park2         | 0 | 0 | 0 | 943  | 15.716667 | 0.433017 | 21.89328 | Stalled      | chr17:11031249-12256226   | 1222.978 |
| 1700001C19Rik | 0 | 0 | 0 | 41   | 0.683333  | 0.268292 | 0.753635 | Unclassified | chr17:47549695-47576276   | 24.582   |
| Yeats2        | 0 | 0 | 0 | 720  | 12        | 4.16813  | 18.27809 | Unclassified | chr16:20139135-20232646   | 91.512   |
| Zfp62         | 0 | 0 | 0 | 979  | 16.316667 | 4.4399   | 17.39632 | Unclassified | chr11:49015001-49032318   | 15.318   |
| Cyp4f39       | 0 | 0 | 0 | 87   | 1.45      | 1.25324  | 2.671119 | Unclassified | chr17:32587667-32630265   | 40.599   |
| Rfx6          | 0 | 0 | 0 | 15   | 0.25      | 0.066732 | 0.82448  | Unclassified | chr10:51395565-51450235   | 52.671   |
| C330007P06Rik | 0 | 0 | 0 | 140  | 2.333333  | 5.9084   | 4.61487  | Unclassified | chrX:34388538-34406241    | 15.704   |
| Lrrfip2       | 0 | 0 | 0 | 424  | 7.066667  | 4.1958   | 33.11655 | Stalled      | chr9:111018614-111128172  | 107.559  |
| Abca12        | 0 | 0 | 0 | 112  | 1.866667  | 0.026178 | 0        | Unclassified | chr1:71289663-71463484    | 171.822  |
| Pyhin1        | 0 | 0 | 0 | 79   | 1.316667  | 7.61558  | 2.207803 | Unclassified | chr1:175558989-175578059  | 17.071   |
| Bat2d         | 0 | 0 | 0 | 1469 | 24.483333 | 23.8019  | 15.61702 | Unclassified | chr1:164601915-164672687  | 68.773   |
| 1700025E21Rik | 0 | 0 | 0 | 9    | 0.15      | 0.060597 | 0.57122  | Unclassified | chr6:30460303-30469963    | 7.661    |
| Rai14         | 0 | 0 | 0 | 208  | 3.466667  | 0.253985 | 1.24634  | Unclassified | chr15:10498733-10645295   | 144.563  |
| 1700011F14Rik | 0 | 0 | 0 | 38   | 0.633333  | 0        | 0        | Unclassified | chr19:58584491-58627575   | 41.085   |
| 1700029I15Rik | 0 | 0 | 0 | 80   | 1.333333  | 0.354042 | 48       | Unclassified | chr2:92221074-92223758    | 0.685    |
| Gpr97         | 0 | 0 | 0 | 46   | 0.766667  | 0.047351 | 0.822746 | Unclassified | chr8:97539591-97569147    | 27.557   |
| Plac8         | 0 | 0 | 0 | 347  | 5.783333  | 16.314   | 1.561746 | Elongating   | chr5:100982751-101003224  | 18.474   |
| Samd9l        | 0 | 0 | 0 | 211  | 3.516667  | 6.18728  | 2.615211 | Elongating   | chr6:3322256-3351571      | 27.316   |
| Ncoa7         | 0 | 0 | 0 | 526  | 8.766667  | 2.57007  | 46.847   | Stalled      | chr10:30365387-30524913   | 157.527  |
| Atp8b1        | 0 | 0 | 0 | 127  | 2.116667  | 0.135263 | 2.071322 | Unclassified | chr18:64688632-64822654   | 132.023  |
| Nrg1          | 0 | 0 | 0 | 64   | 1.066667  | 0.08532  | 0.619171 | Unclassified | chr8:32928499-33030675    | 100.177  |
| Kctd18        | 0 | 0 | 0 | 339  | 5.65      | 4.85764  | 18.54734 | Unclassified | chr1:58011944-58028928    | 14.985   |
| Ibtk          | 0 | 0 | 0 | 670  | 11.16667  | 8.92122  | 0.397582 | Unclassified | chr9:85580962-85639766    | 56.805   |
| D830046C22Rik | 0 | 0 | 0 | 57   | 0.95      | 0        | 0.545584 | Unclassified | chr5:139851650-139856007  | 2.358    |
| Cmtm8         | 0 | 0 | 0 | 223  | 3.716667  | 2.76944  | 21.99635 | Stalled      | chr9:114698462-114755270  | 54.809   |
| Cort          | 0 | 0 | 0 | 93   | 1.55      | 0.566183 | 1.744915 | Unclassified | chr4:148499299-148502850  | 1.552    |
| Dlat          | 0 | 0 | 0 | 348  | 5.8       | 10.6026  | 37.13668 | Stalled      | chr9:50442739-50469885    | 25.147   |
| Fam188a       | 0 | 0 | 0 | 816  | 13.6      | 8.07422  | 30.85413 | Unclassified | chr2:12268890-12343087    | 72.198   |
| Nthl1         | 0 | 0 | 0 | 158  | 2.633333  | 5.96274  | 22.89395 | Stalled      | chr17:24767626-24775782   | 6.157    |
| Akap1         | 0 | 0 | 0 | 561  | 9.35      | 5.73926  | 28.1446  | Unclassified | chr11:88692105-88727900   | 33.796   |
| Akap4         | 0 | 0 | 0 | 3    | 0.05      | 0.0135   | 0        | Unclassified | chrX:6642644-6655732      | 11.089   |
| Akap3         | 0 | 0 | 0 | 30   | 0.5       | 0.068989 | 0.428111 | Unclassified | chr6:12680115-126824326   | 21.212   |
| Dusp5         | 0 | 0 | 0 | 1272 | 21.2      | 6.3795   | 6.509685 | Unclassified | chr19:53601807-53615812   | 12.006   |
| Mttp          | 0 | 0 | 0 | 58   | 0.966667  | 1.63471  | 0.415528 | Unclassified | chr3:137752818-137796341  | 41.524   |
| Mast2         | 0 | 0 | 0 | 632  | 10.53333  | 5.9376   | 16.7018  | Stalled      | chr4:115979366-116138788  | 157.423  |
| Mtnr1a        | 0 | 0 | 0 | 8    | 0.133333  | 0.05969  | 0        | Unclassified | chr8:46152563-46173860    | 19.298   |
| Mtm1          | 0 | 0 | 0 | 116  | 1.933333  | 0.794184 | 9.242916 | Unclassified | chrX:68466256-68568470    | 100.215  |
| Sic35f3       | 0 | 0 | 0 | 138  | 2.3       | 0.119736 | 2.543536 | Unclassified | chr8:128820478-128919877  | 97.4     |
| Micall2       | 0 | 0 | 0 | 55   | 0.916667  | 0.310151 | 1.494846 | Unclassified | chr5:140182646-140214287  | 29.642   |
| Exoc5         | 0 | 0 | 0 | 498  | 8.3       | 4.99946  | 53.62111 | Stalled      | chr14:49631818-49688342   | 54.525   |
| Gsr           | 0 | 0 | 0 | 531  | 8.85      | 2.70244  | 6.878829 | Unclassified | chr8:34761709-34808634    | 44.926   |
| Stim2         | 0 | 0 | 0 | 631  | 10.51667  | 3.64457  | 44.35793 | Stalled      | chr5:54387761-54512295    | 122.535  |
| Sox14         | 0 | 0 | 0 | 2    | 0.033333  | 0.106023 | 0        | Unclassified | chr9:99774534-99778589    | 2.056    |
| Wfikkn1       | 0 | 0 | 0 | 177  | 2.95      | 0.343655 | 0.931812 | Unclassified | chr17:26014572-26019803   | 3.232    |

|               |   |   |   |      |          |          |          |              |                           |         |
|---------------|---|---|---|------|----------|----------|----------|--------------|---------------------------|---------|
| Sos1          | 0 | 0 | 0 | 986  | 16.43333 | 3.6508   | 21.32801 | Unclassified | chr17:80793091-80881793   | 86.703  |
| Sort1         | 0 | 0 | 0 | 117  | 1.95     | 0.220088 | 6.167539 | Unclassified | chr3:108085049-108164429  | 77.381  |
| Sox12         | 0 | 0 | 0 | 288  | 4.8      | 4.91525  | 3.65465  | Unclassified | chr2:152219347-152225782  | 4.436   |
| Sox11         | 0 | 0 | 0 | 10   | 0.166667 | 0.140264 | 0.482268 | Unclassified | chr12:28019132-28029583   | 8.452   |
| Vezt          | 0 | 0 | 0 | 484  | 8.066667 | 2.24303  | 19.70508 | Unclassified | chr10:93430844-93500493   | 67.65   |
| Sox1          | 0 | 0 | 0 | 5    | 0.083333 | 0.117464 | 1.006293 | Unclassified | chr8:12393518-12399555    | 4.038   |
| Rnf150        | 0 | 0 | 0 | 212  | 3.533333 | 0.756205 | 3.694703 | Unclassified | chr8:85385254-85615169    | 227.916 |
| Lphn1         | 0 | 0 | 0 | 330  | 5.5      | 1.87805  | 6.550738 | Unclassified | chr8:86421996-86465853    | 41.858  |
| Olf146        | 0 | 0 | 0 | 0    | 0        | 0.013916 | 0        | Unclassified | chr9:38826203-38829124    | 0.922   |
| Poln          | 0 | 0 | 0 | 678  | 11.3     | 0        | 102.7668 | Stalled      | chr5:34349846-34514097    | 162.252 |
| Rpl31         | 0 | 0 | 0 | 572  | 9.533333 | 0        | 2.958811 | Elongating   | chr1:39422695-39428753    | 4.059   |
| Tcap          | 0 | 0 | 0 | 10   | 0.166667 | 0.161856 | 0.183206 | Unclassified | chr11:98243124-98246267   | 1.144   |
| St6galnac1    | 0 | 0 | 0 | 17   | 0.283333 | 0.058862 | 0.88289  | Unclassified | chr11:116626338-116638821 | 10.484  |
| Sucla2        | 0 | 0 | 0 | 376  | 6.266667 | 10.7713  | 26.20855 | Stalled      | chr14:73950592-73995949   | 43.358  |
| Olf1415       | 0 | 0 | 0 | 2    | 0.033333 | 0.040204 | 0        | Unclassified | chr1:94387394-94390330    | 0.937   |
| Amot          | 0 | 0 | 0 | 21   | 0.35     | 0.076515 | 1.351801 | Unclassified | chrX:141880966-141923589  | 40.624  |
| Stxbp4        | 0 | 0 | 0 | 451  | 7.516667 | 0.454964 | 103.4288 | Stalled      | chr11:90337808-90501422   | 161.615 |
| Tfdp2         | 0 | 0 | 0 | 284  | 4.733333 | 1.02902  | 12.65875 | Stalled      | chr9:96094693-96224065    | 127.373 |
| Eif1          | 0 | 0 | 0 | 949  | 15.81667 | 42.3322  | 6.615883 | Unclassified | chr11:100179309-100183410 | 2.102   |
| St8sia1       | 0 | 0 | 0 | 200  | 3.333333 | 0.143828 | 2.137804 | Unclassified | chr6:142770060-142914972  | 142.913 |
| 3830403N18Rik | 0 | 0 | 0 | 7    | 0.116667 | 0.19801  | 1.522126 | Unclassified | chrX:53387748-53406673    | 16.926  |
| Rhox7         | 0 | 0 | 0 | 1    | 0.016667 | 0.005363 | 0        | Unclassified | chrX:35182862-35194348    | 9.487   |
| Tmem82        | 0 | 0 | 0 | 52   | 0.866667 | 0.831262 | 3.501716 | Unclassified | chr4:141170147-141176548  | 4.402   |
| 3830417A13Rik | 0 | 0 | 0 | 2    | 0.033333 | 0.015554 | 0        | Unclassified | chrX:61424722-61431952    | 5.231   |
| Nup205        | 0 | 0 | 0 | 989  | 16.48333 | 10.6143  | 12.21894 | Unclassified | chr6:35125615-35197590    | 69.976  |
| Gm14484       | 0 | 0 | 0 | 0    | 0        | 0        | 0        | Unclassified | chrX:10887059-10889553    | 0.495   |
| Olf1275       | 0 | 0 | 0 | 2    | 0.033333 | 0        | 1        | Unclassified | chr2:111071009-111073948  | 0.94    |
| Rbms1         | 0 | 0 | 0 | 1832 | 30.53333 | 13.1477  | 15.77191 | Unclassified | chr2:60590009-60721495    | 129.487 |
| Myh7          | 0 | 0 | 0 | 27   | 0.45     | 0.036414 | 0        | Unclassified | chr14:55589524-55615386   | 23.863  |
| Otx1          | 0 | 0 | 0 | 24   | 0.4      | 0.19508  | 0.88828  | Unclassified | chr11:21894766-21903654   | 6.889   |
| Otp           | 0 | 0 | 0 | 12   | 0.2      | 0.314445 | 0.413696 | Unclassified | chr13:95643581-95653636   | 8.056   |
| 2310042E22Rik | 0 | 0 | 0 | 0    | 0        | 0.007021 | 0        | Unclassified | chr16:21152731-21156017   | 1.287   |
| Ovol1         | 0 | 0 | 0 | 52   | 0.866667 | 0.477175 | 2.155244 | Unclassified | chr19:5549136-5562575     | 11.44   |
| Otx2          | 0 | 0 | 0 | 6    | 0.1      | 0.104077 | 1.103139 | Unclassified | chr14:49277858-49284547   | 4.69    |
| Fzd10         | 0 | 0 | 0 | 5    | 0.083333 | 0.141546 | 0.332109 | Unclassified | chr5:129104980-129109968  | 2.989   |
| BC032203      | 0 | 0 | 0 | 233  | 3.883333 | 1.91863  | 0.637567 | Unclassified | chr17:46935064-46970362   | 33.299  |
| Lrrc9         | 0 | 0 | 0 | 44   | 0.733333 | 0.272622 | 3.842972 | Unclassified | chr12:73540852-73611552   | 68.701  |
| Gm6289        | 0 | 0 | 0 | 6    | 0.1      | 0        | 0        | Unclassified | chr3:144542288-144560975  | 16.688  |
| Crmp1         | 0 | 0 | 0 | 69   | 1.15     | 0.12949  | 1.279084 | Unclassified | chr5:37631318-37683372    | 50.055  |
| Crif1         | 0 | 0 | 0 | 76   | 1.266667 | 0.926359 | 0.119708 | Unclassified | chr8:73015054-73027980    | 10.927  |
| Nxt2          | 0 | 0 | 0 | 53   | 0.883333 | 1.61957  | 30.41299 | Stalled      | chrX:138660735-138674233  | 11.499  |
| Pcdha6        | 0 | 0 | 0 | 111  | 1.85     | 0        | 0        | Unclassified | chr18:37125409-37347311   | 219.903 |
| Ccdc155       | 0 | 0 | 0 | 196  | 3.266667 | 1.84192  | 41.87148 | Stalled      | chr7:52439046-52462262    | 21.217  |
| Lyg2          | 0 | 0 | 0 | 7    | 0.116667 | 0.03499  | 0.614693 | Unclassified | chr1:37962767-37975338    | 10.572  |
| B3gnt7        | 0 | 0 | 0 | 216  | 3.6      | 9.77558  | 3.18166  | Unclassified | chr1:88197795-88203878    | 4.084   |
| V1rb8         | 0 | 0 | 0 | 0    | 0        | 0.013781 | 0        | Unclassified | chr6:89924164-89927094    | 0.931   |
| Hif3a         | 0 | 0 | 0 | 145  | 2.416667 | 0.724932 | 18.64492 | Stalled      | chr7:17616341-17644028    | 25.688  |
| Htatip2       | 0 | 0 | 0 | 264  | 4.4      | 12.4971  | 13.49965 | Unclassified | chr7:57012475-57029369    | 14.895  |
| Ppp1r3c       | 0 | 0 | 0 | 11   | 0.183333 | 0.114945 | 3.381818 | Unclassified | chr19:36806220-36813094   | 4.875   |
| V1ra8         | 0 | 0 | 0 | 1    | 0.016667 | 0.03809  | 0        | Unclassified | chr6:90150810-90153650    | 0.841   |
| V1ra9         | 0 | 0 | 0 | 2    | 0.033333 | 0.020231 | 0        | Unclassified | chr6:90217099-90220047    | 0.949   |
| Lpar2         | 0 | 0 | 0 | 302  | 5.033333 | 1.56038  | 10.50313 | Unclassified | chr8:72344463-72355001    | 8.539   |
| 4931408A02Rik | 0 | 0 | 0 | 99   | 1.65     | 0.189688 | 1.347609 | Unclassified | chr16:90829357-90904940   | 73.584  |
| V1rc2         | 0 | 0 | 0 | 3    | 0.05     | 0.04794  | 3        | Unclassified | chr6:58255290-58258202    | 0.913   |
| Nelf          | 0 | 0 | 0 | 163  | 2.716667 | 5.0475   | 8.473444 | Unclassified | chr2:24907898-24918401    | 8.504   |
| Dffb          | 0 | 0 | 0 | 294  | 4.9      | 13.6278  | 14.96839 | Unclassified | chr4:153338557-153351190  | 10.634  |
| Spon1         | 0 | 0 | 0 | 469  | 7.816667 | 0.247289 | 1.874063 | Unclassified | chr7:120907511-121186689  | 277.379 |
| B430211C08Rik | 0 | 0 | 0 | 27   | 0.45     | 0.139076 | 0        | Unclassified | chr7:15146519-15210415    | 61.897  |
| Sic22a6       | 0 | 0 | 0 | 7    | 0.116667 | 0.038112 | 1.300944 | Unclassified | chr19:8690485-8702789     | 10.305  |
| Pik3c3        | 0 | 0 | 0 | 645  | 10.75    | 8.96794  | 13.33344 | Unclassified | chr18:30430549-30507774   | 75.226  |
| Oprm1         | 0 | 0 | 0 | 216  | 3.6      | 0.058278 | 0        | Unclassified | chr10:3308331-3559940     | 249.61  |
| Orc2l         | 0 | 0 | 0 | 745  | 12.41667 | 7.60672  | 23.76615 | Unclassified | chr1:58519614-58563763    | 42.15   |
| BC048502      | 0 | 0 | 0 | 10   | 0.166667 | 0.070906 | 0        | Unclassified | chr15:103269390-103280890 | 9.501   |
| Idh3g         | 0 | 0 | 0 | 603  | 10.05    | 47.7143  | 16.52944 | Unclassified | chrX:71024301-71034236    | 7.936   |
| Sifn9         | 0 | 0 | 0 | 105  | 1.75     | 1.46958  | 8.12664  | Unclassified | chr11:82793804-82807332   | 11.529  |
| Sifn10        | 0 | 0 | 0 | 187  | 3.116667 | 1.42033  | 12.47517 | Stalled      | chr11:82841629-82856035   | 12.407  |
| Ppp1r3d       | 0 | 0 | 0 | 6    | 0.1      | 0.215829 | 2.125146 | Unclassified | chr2:178145911-178151177  | 3.267   |
| Pls3          | 0 | 0 | 0 | 50   | 0.833333 | 0.663187 | 2.884533 | Unclassified | chrX:73030992-73121913    | 88.922  |
| 1700071K01Rik | 0 | 0 | 0 | 4    | 0.066667 | 0.539157 | 1        | Unclassified | chr11:81386003-81389041   | 1.039   |
| Aaas          | 0 | 0 | 0 | 387  | 6.45     | 22.3272  | 10.94201 | Unclassified | chr15:102168677-102183190 | 12.514  |
| V1rc24        | 0 | 0 | 0 | 1    | 0.016667 | 0.028165 | 0        | Unclassified | chr6:57875876-57878785    | 0.91    |
| V1rc21        | 0 | 0 | 0 | 3    | 0.05     | 0.043008 | 2        | Unclassified | chr6:56904506-56907400    | 0.895   |
| V1rc20        | 0 | 0 | 0 | 1    | 0.016667 | 0.00701  | 1        | Unclassified | chr6:56950348-56953260    | 0.913   |
| V1rc19        | 0 | 0 | 0 | 1    | 0.016667 | 0.07434  | 0        | Unclassified | chr6:56933335-56936283    | 0.949   |
| V1rc18        | 0 | 0 | 0 | 2    | 0.033333 | 0        | 1        | Unclassified | chr6:57905636-57908525    | 0.89    |
| V1rc17        | 0 | 0 | 0 | 1    | 0.016667 | 0        | 0        | Unclassified | chr6:57958176-57961196    | 1.021   |
| Ces7          | 0 | 0 | 0 | 19   | 0.316667 | 0.020136 | 0.532637 | Unclassified | chr8:96038094-96061607    | 21.514  |
| Grk1          | 0 | 0 | 0 | 35   | 0.583333 | 0.063784 | 1.383911 | Unclassified | chr8:13403080-13421949    | 16.87   |
| Xkrx          | 0 | 0 | 0 | 30   | 0.5      | 0.479257 | 2.168466 | Unclassified | chrX:130683583-130698467  | 12.885  |
| Olf111        | 0 | 0 | 0 | 2    | 0.033333 | 0        | 1        | Unclassified | chr17:37664901-37667942   | 1.042   |
| V1rc26        | 0 | 0 | 0 | 2    | 0.033333 | 0        | 2        | Unclassified | chr6:57339661-57342561    | 0.901   |
| V1rc25        | 0 | 0 | 0 | 1    | 0.016667 | 0        | 1        | Unclassified | chr6:58213167-58216076    | 0.91    |
| 2610036L11Rik | 0 | 0 | 0 | 269  | 4.483333 | 9.2809   | 24.54302 | Stalled      | chr10:29915814-29922346   | 4.533   |
| Smurf2        | 0 | 0 | 0 | 709  | 11.81667 | 2.70056  | 45.10905 | Stalled      | chr11:106681379-106784029 | 100.651 |
| Gnb4          | 0 | 0 | 0 | 234  | 3.9      | 3.91778  | 4.018289 | Unclassified | chr3:32482449-32517457    | 33.009  |
| Senp7         | 0 | 0 | 0 | 408  | 6.8      | 7.30863  | 34.96874 | Stalled      | chr16:56073521-56190124   | 114.604 |

|               |   |          |   |      |          |          |          |              |                           |         |
|---------------|---|----------|---|------|----------|----------|----------|--------------|---------------------------|---------|
| Slc9a2        | 0 | 0        | 0 | 73   | 1.216667 | 0.311877 | 2.295322 | Unclassified | chr1:40736556-40825730    | 87.175  |
| Gngt1         | 0 | 0        | 0 | 2    | 0.033333 | 0        | 0        | Unclassified | chr6:3942011-3947436      | 3.426   |
| 1110065P20Rik | 0 | 0        | 0 | 543  | 9.05     | 9.66595  | 14.72389 | Unclassified | chr4:124526728-124529974  | 1.247   |
| Vmem86b       | 0 | 0        | 0 | 189  | 3.15     | 2.64297  | 0.568479 | Unclassified | chr7:4579641-4584084      | 2.444   |
| Tmm2r61       | 0 | 0        | 0 | 22   | 0.366667 | 0.005948 | 0.665014 | Unclassified | chr7:49513422-49556125    | 40.704  |
| Ptcd2         | 0 | 0        | 0 | 745  | 12.41667 | 11.651   | 22.84322 | Unclassified | chr13:100089603-100116633 | 25.031  |
| Gm5523        | 0 | 0        | 0 | 13   | 0.216667 | 0.181019 | 12       | Unclassified | chr1:13775765-13779010    | 1.246   |
| Larp4b        | 0 | 0        | 0 | 1535 | 25.58333 | 13.438   | 21.45359 | Unclassified | chr13:9091150-9172336     | 79.187  |
| Pde5a         | 0 | 0        | 0 | 131  | 2.183333 | 0.240039 | 2.602894 | Unclassified | chr3:122430075-122562290  | 130.216 |
| Cycl1         | 0 | 0        | 0 | 1    | 0.016667 | 0.013058 | 0        | Unclassified | chrX:108303756-108319213  | 13.458  |
| Nlgn2         | 0 | 0        | 0 | 70   | 1.166667 | 1.43969  | 1.725869 | Unclassified | chr11:69636624-69650351   | 11.728  |
| Nts           | 0 | 0        | 0 | 2    | 0.033333 | 0        | 0        | Unclassified | chr10:101944389-101955052 | 8.664   |
| Setd8         | 0 | 0        | 0 | 1025 | 17.08333 | 18.2968  | 3.919413 | Unclassified | chr5:124887938-124912316  | 22.379  |
| Defb13        | 0 | 0        | 0 | 1    | 0.016667 | 0        | 0        | Unclassified | chr8:23055233-23059094    | 1.862   |
| Zfp758        | 0 | 0        | 0 | 124  | 2.066667 | 2.64383  | 10.46873 | Stalled      | chr17:22496419-22514248   | 15.83   |
| Cntnap3       | 0 | 0        | 0 | 59   | 0.983333 | 0.028961 | 2.240846 | Unclassified | chr13:64838898-65007196   | 166.299 |
| 4932441B19Rik | 0 | 0        | 0 | 5    | 0.083333 | 0.018903 | 0.496729 | Unclassified | chr13:65132365-65139312   | 4.948   |
| Fmo5          | 0 | 0        | 0 | 72   | 1.2      | 0.693426 | 18.57007 | Stalled      | chr3:97430760-97459210    | 26.451  |
| Trpm2         | 0 | 0        | 0 | 98   | 1.633333 | 0.140577 | 2.427414 | Unclassified | chr10:77370467-77434617   | 62.151  |
| Hif1an        | 0 | 0        | 0 | 446  | 7.433333 | 6.66019  | 6.160927 | Unclassified | chr19:44635343-44650764   | 13.422  |
| Gcgr          | 0 | 0        | 0 | 34   | 0.566667 | 0.059796 | 0.959582 | Unclassified | chr11:120390040-120400298 | 8.259   |
| Gcg           | 0 | 0        | 0 | 10   | 0.166667 | 0.117473 | 0.474453 | Unclassified | chr2:62312586-62323710    | 9.125   |
| Gcet2         | 0 | 0        | 0 | 27   | 0.45     | 0.163216 | 1.762157 | Unclassified | chr16:45608552-45622980   | 12.429  |
| Slco1a1       | 0 | 0        | 0 | 22   | 0.366667 | 0.00677  | 1.309666 | Unclassified | chr6:141856373-141897315  | 38.943  |
| Slc41a1       | 0 | 0        | 0 | 560  | 9.333333 | 8.99997  | 22.63398 | Unclassified | chr1:133722588-133745438  | 20.851  |
| Slc17a4       | 0 | 0        | 0 | 33   | 0.55     | 0.077424 | 0.730734 | Unclassified | chr13:23989757-24008876   | 17.12   |
| Mex3a         | 0 | 0        | 0 | 52   | 0.866667 | 1.38457  | 1.856678 | Unclassified | chr3:88337969-88345300    | 5.332   |
| Cxx1c         | 0 | 0        | 0 | 11   | 0.183333 | 2.69113  | 10       | Unclassified | chrX:50909098-50912311    | 1.214   |
| Naa38         | 0 | 0        | 0 | 351  | 5.85     | 23.1154  | 25.69636 | Unclassified | chr6:18796634-18804052    | 5.419   |
| Helt          | 0 | 0        | 0 | 8    | 0.133333 | 0.184046 | 0.245283 | Unclassified | chr8:47377401-47382025    | 2.625   |
| Sorbs2        | 0 | 0        | 0 | 288  | 4.8      | 0.096183 | 0        | Unclassified | chr8:46591148-46913258    | 320.111 |
| Bbs9          | 0 | 0        | 0 | 1033 | 17.21667 | 4.10445  | 9.077175 | Unclassified | chr9:22278158-22692724    | 412.567 |
| Psp1          | 0 | 0        | 0 | 882  | 14.7     | 20.9478  | 10.6764  | Unclassified | chr4:83101584-83134294    | 30.711  |
| Zfp334        | 0 | 0        | 0 | 18   | 0.3      | 0.045836 | 1.187311 | Unclassified | chr2:165202935-165215759  | 10.825  |
| Znrf3         | 0 | 0        | 0 | 866  | 14.43333 | 0.749787 | 24.02548 | Stalled      | chr11:5176331-5346850     | 168.52  |
| I133          | 0 | 0        | 0 | 63   | 1.05     | 0.045146 | 0        | Unclassified | chr19:29997603-30035205   | 35.603  |
| A930001N09Rik | 0 | 125.7342 | 0 | 435  | 7.25     | 0.95799  | 36.03545 | Stalled      | chr17:26850594-26913569   | 60.976  |
| Defb11        | 0 | 0        | 0 | 1    | 0.016667 | 0        | 0        | Unclassified | chr8:23015860-23018883    | 1.024   |
| Olfr748       | 0 | 0        | 0 | 1    | 0.016667 | 0.013838 | 0        | Unclassified | chr14:51328006-51330930   | 0.925   |
| Olfr694       | 0 | 0        | 0 | 0    | 0        | 0.020263 | 0        | Unclassified | chr7:113832295-113835243  | 0.949   |
| Serpini2      | 0 | 0        | 0 | 11   | 0.183333 | 0.036358 | 0        | Unclassified | chr3:75046292-75076000    | 27.709  |
| Lrrc39        | 0 | 0        | 0 | 128  | 2.133333 | 1.86658  | 0.265852 | Unclassified | chr3:116263890-116286052  | 20.163  |
| Olfr1437      | 0 | 0        | 0 | 1    | 0.016667 | 0        | 1        | Unclassified | chr19:12396376-12399315   | 0.94    |
| Olfr1317      | 0 | 0        | 0 | 1    | 0.016667 | 0.026921 | 1        | Unclassified | chr2:111980103-111983054  | 0.952   |
| Olfr164       | 0 | 0        | 0 | 1    | 0.016667 | 0.175751 | 1        | Unclassified | chr16:19285886-19288834   | 0.949   |
| Olfr1314      | 0 | 0        | 0 | 3    | 0.05     | 0        | 1        | Unclassified | chr2:111931917-111934856  | 0.94    |
| Olfr282       | 0 | 0        | 0 | 1    | 0.016667 | 0.103564 | 1        | Unclassified | chr15:98265900-98268828   | 0.929   |
| Mpp2          | 0 | 0        | 0 | 92   | 1.533333 | 0.285365 | 5.219251 | Unclassified | chr11:101918330-101951829 | 31.5    |
| Grif1         | 0 | 0        | 0 | 1649 | 27.48333 | 2.87567  | 46.6975  | Unclassified | chr7:17079821-17202342    | 120.522 |
| Uba2          | 0 | 0        | 0 | 927  | 15.45    | 36.4988  | 15.56909 | Unclassified | chr7:34925715-34955548    | 27.834  |
| Prl6a1        | 0 | 0        | 0 | 6    | 0.1      | 0.05913  | 0        | Unclassified | chr13:27402495-27411120   | 6.626   |
| Prl4a1        | 0 | 0        | 0 | 3    | 0.05     | 0.030085 | 0.75976  | Unclassified | chr13:28106091-28115415   | 7.325   |
| Prl7a1        | 0 | 0        | 0 | 3    | 0.05     | 0        | 1.780798 | Unclassified | chr13:27725239-27736362   | 9.124   |
| Prl8a6        | 0 | 0        | 0 | 4    | 0.066667 | 0        | 0.612703 | Unclassified | chr13:27524721-27532466   | 5.746   |
| Prl7a2        | 0 | 0        | 0 | 6    | 0.1      | 0        | 0.628363 | Unclassified | chr13:27750452-27761905   | 9.454   |
| Prlr          | 0 | 0        | 0 | 246  | 4.1      | 0.171248 | 3.318509 | Unclassified | chr15:10104992-10266775   | 159.784 |
| Prm2          | 0 | 0        | 0 | 3    | 0.05     | 0        | 3        | Unclassified | chr16:10791473-10794190   | 0.718   |
| Prm1          | 0 | 0        | 0 | 4    | 0.066667 | 0.096122 | 4        | Unclassified | chr16:10796424-10798916   | 0.493   |
| Spc24         | 0 | 0        | 0 | 326  | 5.433333 | 22.8109  | 5.437767 | Unclassified | chr9:21559885-21566730    | 4.846   |
| Pard3         | 0 | 0        | 0 | 561  | 9.35     | 0.169032 | 2.978857 | Unclassified | chr8:129585955-130136186  | 548.232 |
| Fhdcl         | 0 | 0        | 0 | 61   | 1.016667 | 0.131578 | 2.430451 | Unclassified | chr3:84247946-84286351    | 36.406  |
| Chtf8         | 0 | 0        | 0 | 807  | 13.45    | 24.8735  | 11.15059 | Unclassified | chr8:109407762-109419493  | 9.732   |
| Gpr25         | 0 | 0        | 0 | 22   | 0.366667 | 1.22322  | 1.071429 | Unclassified | chr1:138155491-138159450  | 1.96    |
| Otud6b        | 0 | 0        | 0 | 305  | 5.083333 | 7.96568  | 25.63265 | Stalled      | chr4:14736651-14755734    | 17.084  |
| 4930486L24Rik | 0 | 0        | 0 | 13   | 0.216667 | 0.037338 | 1.350776 | Unclassified | chr13:60943972-60967777   | 21.806  |
| Nlrp10        | 0 | 0        | 0 | 44   | 0.733333 | 0.544578 | 4.986522 | Unclassified | chr7:116065366-116075672  | 8.307   |
| Thoc5         | 0 | 0        | 0 | 652  | 10.86667 | 13.0267  | 21.44137 | Unclassified | chr11:4793345-4828868     | 33.524  |
| Fras1         | 0 | 0        | 0 | 313  | 5.216667 | 0.088935 | 1.141792 | Unclassified | chr5:96800973-97213747    | 410.775 |
| Whsc1         | 0 | 0        | 0 | 1516 | 25.26667 | 16.3554  | 8.830636 | Unclassified | chr5:34161477-34238525    | 75.049  |
| Samd12        | 0 | 0        | 0 | 283  | 4.716667 | 0.13722  | 2.44706  | Unclassified | chr15:53293355-53735991   | 440.637 |
| Cd209a        | 0 | 0        | 0 | 7    | 0.116667 | 0.034545 | 0.604795 | Unclassified | chr8:3743394-3750984      | 5.591   |
| Tm7sf3        | 0 | 0        | 0 | 390  | 6.5      | 3.33941  | 2.275793 | Elongating   | chr6:146550797-146585114  | 32.318  |
| Mfsd7c        | 0 | 0        | 0 | 237  | 3.95     | 0.458614 | 1.583082 | Unclassified | chr12:87085488-87154535   | 67.048  |
| Grwd1         | 0 | 0        | 0 | 315  | 5.25     | 26.0122  | 3.516614 | Unclassified | chr7:53080592-53088159    | 5.568   |
| Tdrd9         | 0 | 0        | 0 | 124  | 2.066667 | 0.026651 | 0.890415 | Unclassified | chr12:113207769-113307065 | 97.297  |
| Ntm           | 0 | 0        | 0 | 697  | 11.61667 | 0.10633  | 0        | Unclassified | chr9:28803548-29772714    | 967.167 |
| 6720456H20Rik | 0 | 0        | 0 | 452  | 7.533333 | 1.52986  | 48.95398 | Stalled      | chr14:49064026-49134834   | 68.809  |
| Ash2l         | 0 | 0        | 0 | 719  | 11.98333 | 16.3841  | 11.33704 | Unclassified | chr8:26927341-26953251    | 23.911  |
| Lgals2        | 0 | 0        | 0 | 20   | 0.333333 | 0        | 0.355024 | Unclassified | chr15:78681291-78687959   | 4.669   |
| Fbxo25        | 0 | 0        | 0 | 238  | 3.966667 | 3.40833  | 13.04965 | Stalled      | chr8:13905805-13940521    | 32.717  |
| Ccni          | 0 | 0        | 0 | 615  | 10.25    | 16.7174  | 14.08045 | Unclassified | chr5:93610958-93637521    | 24.564  |
| Slc14a2       | 0 | 0        | 0 | 398  | 6.633333 | 0.066177 | 0.531809 | Unclassified | chr18:78342882-78795689   | 450.808 |
| D630003M21Rik | 0 | 0        | 0 | 84   | 1.4      | 0.0618   | 0        | Unclassified | chr2:158008268-158056958  | 46.691  |
| Arih2         | 0 | 0        | 0 | 626  | 10.43333 | 4.96625  | 22.4852  | Unclassified | chr9:108505273-108553711  | 46.439  |
| Gm4981        | 0 | 0        | 0 | 8    | 0.133333 | 0.243667 | 1.346196 | Unclassified | chr10:57697595-57701408   | 1.814   |
| Scgn          | 0 | 0        | 0 | 39   | 0.65     | 0.054499 | 3.797473 | Unclassified | chr13:24045325-24085083   | 37.759  |



|               |   |   |   |      |          |          |          |              |                           |         |
|---------------|---|---|---|------|----------|----------|----------|--------------|---------------------------|---------|
| Lemd1         | 0 | 0 | 0 | 129  | 2.15     | 0.10441  | 1.755827 | Unclassified | chr1:134086012-134153958  | 65.947  |
| Olfr1109      | 0 | 0 | 0 | 2    | 0.033333 | 0        | 0        | Unclassified | chr2:86932613-86935552    | 0.94    |
| Ccdc54        | 0 | 0 | 0 | 2    | 0.033333 | 0.197783 | 0        | Unclassified | chr16:50589971-50593267   | 1.297   |
| Fbxo6         | 0 | 0 | 0 | 309  | 5.15     | 10.8487  | 7.239246 | Unclassified | chr4:147519824-147528034  | 6.211   |
| Il17c         | 0 | 0 | 0 | 262  | 4.366667 | 0.352743 | 1.136873 | Elongating   | chr8:124943984-124947539  | 1.556   |
| 4933433C11Rik | 0 | 0 | 0 | 7    | 0.116667 | 0.035875 | 0        | Unclassified | chr2:25068079-25072150    | 2.072   |
| Arhgap24      | 0 | 0 | 0 | 776  | 12.93333 | 3.19876  | 21.45149 | Stalled      | chr5:102908409-103326956  | 416.548 |
| Cep72         | 0 | 0 | 0 | 300  | 5        | 2.05685  | 28.49234 | Stalled      | chr13:74173942-74201733   | 25.792  |
| 4933427D14Rik | 0 | 0 | 0 | 189  | 3.15     | 1.69811  | 0.424823 | Unclassified | chr11:71967598-72018873   | 49.276  |
| Kifc3         | 0 | 0 | 0 | 119  | 1.983333 | 0.292276 | 1.064717 | Unclassified | chr8:97623727-97668440    | 42.714  |
| Kifc1         | 0 | 0 | 0 | 194  | 3.233333 | 15.4629  | 11.29189 | Unclassified | chr17:27052035-27069524   | 15.49   |
| Calm5         | 0 | 0 | 0 | 2    | 0.033333 | 0        | 2        | Unclassified | chr13:3851418-3854007     | 0.59    |
| Snx11         | 0 | 0 | 0 | 399  | 6.65     | 13.7113  | 11.45473 | Unclassified | chr11:96628862-96640869   | 10.008  |
| Mamdc4        | 0 | 0 | 0 | 350  | 5.833333 | 0.825513 | 0.586705 | Unclassified | chr2:25418634-25428836    | 8.203   |
| Uhmk1         | 0 | 0 | 0 | 303  | 5.05     | 9.92059  | 11.12785 | Unclassified | chr1:172129386-172147524  | 16.139  |
| Inadl         | 0 | 0 | 0 | 636  | 10.6     | 1.35032  | 21.59589 | Stalled      | chr4:98060516-98386294    | 323.779 |
| Tlr1          | 0 | 0 | 0 | 98   | 1.633333 | 5.30823  | 2.579891 | Elongating   | chr5:65316072-65325938    | 7.867   |
| Tll1          | 0 | 0 | 0 | 88   | 1.466667 | 0.106629 | 3.506775 | Unclassified | chr8:66493566-66686790    | 191.225 |
| Mpl           | 0 | 0 | 0 | 17   | 0.283333 | 0.061575 | 1.619632 | Unclassified | chr4:118115021-118132100  | 15.08   |
| Alpk3         | 0 | 0 | 0 | 93   | 1.55     | 0.064394 | 1.036967 | Unclassified | chr7:88200485-88250498    | 48.014  |
| Stk3          | 0 | 0 | 0 | 568  | 9.466667 | 2.09973  | 23.62448 | Stalled      | chr15:34805253-35087561   | 280.309 |
| Tmem45a       | 0 | 0 | 0 | 37   | 0.616667 | 0.038002 | 0.689666 | Unclassified | chr16:56805273-56888276   | 81.004  |
| Gkap1         | 0 | 0 | 0 | 104  | 1.733333 | 1.33745  | 11.40005 | Stalled      | chr13:58334711-58377549   | 40.839  |
| Obsl1         | 0 | 0 | 0 | 60   | 1        | 0.399816 | 1.111668 | Unclassified | chr1:75482399-75505027    | 20.629  |
| Wwtr1         | 0 | 0 | 0 | 105  | 1.75     | 0.194269 | 2.782798 | Unclassified | chr3:57259565-57381798    | 120.234 |
| Gm5087        | 0 | 0 | 0 | 63   | 1.05     | 0.016671 | 0        | Unclassified | chr14:13989901-14119152   | 127.252 |
| Pik3c2g       | 0 | 0 | 0 | 77   | 1.283333 | 0.025476 | 0        | Unclassified | chr6:139787965-139917804  | 127.84  |
| Olfr244       | 0 | 0 | 0 | 1    | 0.016667 | 0        | 1        | Unclassified | chr1:176047221-176050145  | 0.925   |
| Gm10639       | 0 | 0 | 0 | 9    | 0.15     | 0.061186 | 0.646002 | Unclassified | chr9:78135734-78153332    | 15.599  |
| Irs1          | 0 | 0 | 0 | 226  | 3.766667 | 0.494278 | 2.57366  | Unclassified | chr1:82229679-82290014    | 58.336  |
| Irs3          | 0 | 0 | 0 | 68   | 1.133333 | 0.449696 | 0.325826 | Unclassified | chr5:138084259-138088942  | 2.684   |
| B3galt5       | 0 | 0 | 0 | 82   | 1.366667 | 0.043616 | 0.50938  | Unclassified | chr16:96455407-96541465   | 84.059  |
| Hemgn         | 0 | 0 | 0 | 149  | 2.483333 | 4.57633  | 3.671546 | Unclassified | chr4:46406860-46419055    | 10.196  |
| Naa11         | 0 | 0 | 0 | 8    | 0.133333 | 0.261655 | 1.291935 | Unclassified | chr5:97811227-97823349    | 10.123  |
| Uncx          | 0 | 0 | 0 | 23   | 0.383333 | 0.104098 | 0.294588 | Unclassified | chr5:140017851-140024132  | 4.282   |
| Lmb           | 0 | 0 | 0 | 55   | 0.916667 | 0.022854 | 0        | Unclassified | chr15:76845918-76883098   | 35.181  |
| Lrrc26        | 0 | 0 | 0 | 5    | 0.083333 | 0.122166 | 1        | Unclassified | chr2:25143466-25146696    | 1.231   |
| Cts8          | 0 | 0 | 0 | 5    | 0.083333 | 0.041127 | 1.434122 | Unclassified | chr13:61348107-61358709   | 8.603   |
| Matn3         | 0 | 0 | 0 | 28   | 0.466667 | 0.346523 | 5.006311 | Unclassified | chr12:8952734-8978297     | 23.564  |
| Plac1         | 0 | 0 | 0 | 16   | 0.266667 | 0        | 0        | Unclassified | chrX:50423178-50469582    | 44.405  |
| Pfpl          | 0 | 0 | 0 | 4    | 0.066667 | 0.137188 | 1        | Unclassified | chr19:12500394-12506600   | 4.207   |
| Cts7          | 0 | 0 | 0 | 6    | 0.1      | 0.017169 | 0.48512  | Unclassified | chr13:61453821-61461531   | 5.711   |
| Pdim3         | 0 | 0 | 0 | 39   | 0.65     | 0.308631 | 2.580507 | Unclassified | chr8:46968838-47004900    | 34.063  |
| Unc5a         | 0 | 0 | 0 | 110  | 1.833333 | 0.145127 | 1.384612 | Unclassified | chr13:55048792-55107379   | 56.588  |
| Lipi          | 0 | 0 | 0 | 12   | 0.2      | 0.017533 | 0        | Unclassified | chr16:75540788-75569927   | 27.14   |
| Dlg3          | 0 | 0 | 0 | 237  | 3.95     | 5.69342  | 0.527091 | Unclassified | chrX:97961085-98013747    | 50.663  |
| Sult1d1       | 0 | 0 | 0 | 5    | 0.083333 | 0        | 0        | Unclassified | chr5:87983674-88000031    | 14.358  |
| Plrg1         | 0 | 0 | 0 | 340  | 5.666667 | 20.504   | 14.89522 | Unclassified | chr3:82857459-82876213    | 16.755  |
| Crh           | 0 | 0 | 0 | 5    | 0.083333 | 0.196538 | 0        | Unclassified | chr3:19593414-19597329    | 1.916   |
| Cela2a        | 0 | 0 | 0 | 79   | 1.316667 | 0.045713 | 0.236166 | Unclassified | chr4:141370877-141383918  | 11.042  |
| Bpi           | 0 | 0 | 0 | 73   | 1.216667 | 0.158493 | 1.718751 | Unclassified | chr2:158081976-158110267  | 26.292  |
| Ccdc60        | 0 | 0 | 0 | 168  | 2.8      | 0.014891 | 0        | Unclassified | chr5:116575589-116740994  | 163.406 |
| Il18          | 0 | 0 | 0 | 8    | 0.133333 | 0.088797 | 0.720553 | Unclassified | chr9:50371472-50389942    | 16.471  |
| Rfp13s        | 0 | 0 | 0 | 13   | 0.216667 | 0        | 0.611925 | Unclassified | chr9:55810395-55830739    | 18.345  |
| Il19          | 0 | 0 | 0 | 13   | 0.216667 | 0.075169 | 0.411202 | Unclassified | chr1:132829232-132837818  | 6.587   |
| Flrt3         | 0 | 0 | 0 | 8    | 0.133333 | 0.035476 | 0.671593 | Unclassified | chr2:140483936-140499205  | 13.27   |
| Vps13c        | 0 | 0 | 0 | 463  | 7.716667 | 1.85938  | 19.20094 | Stalled      | chr9:67686202-67843441    | 155.24  |
| Gpr63         | 0 | 0 | 0 | 21   | 0.35     | 0.016223 | 0        | Unclassified | chr4:24898565-24936380    | 35.816  |
| Tbl1xr1       | 0 | 0 | 0 | 1944 | 32.4     | 2.08357  | 13.00464 | Unclassified | chr3:21973573-22115516    | 139.944 |
| Trim23        | 0 | 0 | 0 | 407  | 6.783333 | 3.21729  | 36.79472 | Stalled      | chr13:104967177-104992128 | 22.952  |
| Sgpp2         | 0 | 0 | 0 | 366  | 6.1      | 0.881385 | 0.698433 | Unclassified | chr1:78304920-78416861    | 109.942 |
| Dnd1          | 0 | 0 | 0 | 251  | 4.183333 | 1.68823  | 0.87483  | Unclassified | chr18:36923325-36927868   | 2.544   |
| Plod1         | 0 | 0 | 0 | 196  | 3.266667 | 2.41628  | 25.78179 | Stalled      | chr4:147283862-147312885  | 27.024  |
| V1rg12        | 0 | 0 | 0 | 0    | 0        | 0        | 0        | Unclassified | chr7:12888153-12891068    | 0.916   |
| Ccdc68        | 0 | 0 | 0 | 33   | 0.55     | 0.033617 | 0        | Unclassified | chr18:70083212-70129138   | 43.927  |
| Zbbx          | 0 | 0 | 0 | 53   | 0.883333 | 0.021202 | 1.371802 | Unclassified | chr3:74841828-74949645    | 105.818 |
| Mmp8          | 0 | 0 | 0 | 13   | 0.216667 | 0.21407  | 3.609403 | Unclassified | chr9:7556428-7568486      | 10.059  |
| Gm826         | 0 | 0 | 0 | 13   | 0.216667 | 0.035049 | 0        | Unclassified | chr2:160137136-160155230  | 16.095  |
| F8            | 0 | 0 | 0 | 64   | 1.066667 | 0.063185 | 0.766081 | Unclassified | chrX:72418057-72627380    | 207.324 |
| F2rl2         | 0 | 0 | 0 | 25   | 0.416667 | 0.031209 | 1.775744 | Unclassified | chr13:96464874-96472723   | 5.85    |
| F2rl3         | 0 | 0 | 0 | 14   | 0.233333 | 0.101832 | 3.512207 | Unclassified | chr8:75283778-75287784    | 2.007   |
| F2r           | 0 | 0 | 0 | 41   | 0.683333 | 0.291526 | 5.004133 | Unclassified | chr13:96371743-96390388   | 16.646  |
| F2rl1         | 0 | 0 | 0 | 53   | 0.883333 | 0.581081 | 4.497742 | Unclassified | chr13:96281683-96297195   | 13.513  |
| F13b          | 0 | 0 | 0 | 15   | 0.25     | 0.032337 | 0        | Unclassified | chr1:141396283-141420333  | 22.051  |
| Cct6a         | 0 | 0 | 0 | 748  | 12.46667 | 45.5062  | 28.98435 | Unclassified | chr5:130291260-130322231  | 28.972  |
| AW549877      | 0 | 0 | 0 | 556  | 9.266667 | 5.75938  | 24.91215 | Unclassified | chr15:3932034-3947752     | 13.719  |
| Defa20        | 0 | 0 | 0 | 0    | 0        | 0.029944 | 0        | Unclassified | chr8:22617727-22620709    | 0.983   |
| Kcnh8         | 0 | 0 | 0 | 165  | 2.75     | 0.116735 | 2.618767 | Unclassified | chr17:52740087-53044544   | 302.458 |
| Lhx8          | 0 | 0 | 0 | 23   | 0.383333 | 0.058344 | 1.733486 | Unclassified | chr3:153969257-153995524  | 24.268  |
| 1110058L19Rik | 0 | 0 | 0 | 140  | 2.333333 | 5.69508  | 22.44877 | Stalled      | chr1:24002778-24014479    | 9.702   |
| Srxn1         | 0 | 0 | 0 | 44   | 0.733333 | 0.267937 | 7.992    | Unclassified | chr2:151929465-151937089  | 5.625   |
| Defb22        | 0 | 0 | 0 | 4    | 0.066667 | 0.041012 | 0.536608 | Unclassified | chr2:152311401-152317874  | 4.474   |
| Spata22       | 0 | 0 | 0 | 9    | 0.15     | 0        | 0.656726 | Unclassified | chr11:73141242-73159546   | 16.305  |
| Ctsll3        | 0 | 0 | 0 | 11   | 0.183333 | 0.038419 | 2.091671 | Unclassified | chr13:60899610-60906205   | 4.596   |
| AU022751      | 0 | 0 | 0 | 3    | 0.05     | 0        | 0.546279 | Unclassified | chrX:5658335-5662538      | 2.204   |
| Ptplb         | 0 | 0 | 0 | 603  | 10.05    | 3.29093  | 28.54302 | Unclassified | chr16:35020506-35109261   | 86.756  |

|                      |   |          |   |      |          |          |          |              |                           |         |
|----------------------|---|----------|---|------|----------|----------|----------|--------------|---------------------------|---------|
| <b>Slc47a2</b>       | 0 | 0        | 0 | 89   | 1.483333 | 0.183321 | 1.974835 | Unclassified | chr11:61115132-61158362   | 41.231  |
| <b>Shisa6</b>        | 0 | 0        | 0 | 217  | 3.616667 | 0.042818 | 0.5965   | Unclassified | chr11:66025226-66341628   | 314.403 |
| <b>Magohb</b>        | 0 | 0        | 0 | 97   | 1.616667 | 6.7084   | 9.315822 | Unclassified | chr6:131234406-131245262  | 8.857   |
| <b>Fmnl2</b>         | 0 | 0        | 0 | 1107 | 18.45    | 0.908794 | 7.189809 | Unclassified | chr2:52714901-52993236    | 276.336 |
| <b>1700108M19Rik</b> | 0 | 0        | 0 | 9    | 0.15     | 0.679654 | 0.55861  | Unclassified | chr12:36934931-36946789   | 9.859   |
| <b>Cnot7</b>         | 0 | 0        | 0 | 458  | 7.633333 | 9.35891  | 26.03169 | Unclassified | chr8:41578389-41598658    | 18.27   |
| <b>Fam83c</b>        | 0 | 0        | 0 | 38   | 0.633333 | 0.076777 | 0.496164 | Unclassified | chr2:155654918-155662590  | 5.673   |
| <b>Trp53inp1</b>     | 0 | 356.2468 | 0 | 443  | 7.383333 | 5.86986  | 21.33294 | Unclassified | chr4:11081587-11101524    | 17.938  |
| <b>Apob</b>          | 0 | 0        | 0 | 41   | 0.683333 | 0.022115 | 0        | Unclassified | chr12:7982482-8023645     | 39.164  |
| <b>Gdf7</b>          | 0 | 0        | 0 | 30   | 0.5      | 0.595215 | 0.689264 | Unclassified | chr12:8304723-8310760     | 4.038   |
| <b>Cxcl3</b>         | 0 | 0        | 0 | 7    | 0.116667 | 0.853218 | 1.32352  | Unclassified | chr5:91213128-91217116    | 1.989   |
| <b>Aqp12</b>         | 0 | 0        | 0 | 10   | 0.166667 | 0        | 0        | Unclassified | chr1:94900910-94908846    | 5.937   |
| <b>Rpusd2</b>        | 0 | 0        | 0 | 332  | 5.533333 | 5.25535  | 13.70153 | Unclassified | chr2:118858525-118867931  | 7.407   |
| <b>Pln</b>           | 0 | 0        | 0 | 24   | 0.4      | 0.103357 | 0.516687 | Unclassified | chr10:53055491-53065805   | 8.315   |
| <b>Fhl4</b>          | 0 | 0        | 0 | 251  | 4.183333 | 1.62231  | 38.33708 | Stalled      | chr10:84559763-84567240   | 5.478   |
| <b>Figf</b>          | 0 | 0        | 0 | 30   | 0.5      | 0        | 0        | Unclassified | chrX:160809479-160840579  | 29.101  |
| <b>Gsdma2</b>        | 0 | 0        | 0 | 7    | 0.116667 | 0.090041 | 0        | Unclassified | chr11:98506072-98519271   | 11.2    |
| <b>Fktn</b>          | 0 | 0        | 0 | 225  | 3.75     | 0.454538 | 32.14107 | Stalled      | chr4:53725053-53776143    | 49.091  |
| <b>Cpa2</b>          | 0 | 0        | 0 | 67   | 1.116667 | 0.396043 | 0.254366 | Unclassified | chr6:30489641-30514473    | 22.833  |
| <b>Trdn</b>          | 0 | 0        | 0 | 133  | 2.216667 | 0.019875 | 0.748201 | Unclassified | chr10:32801288-33196515   | 393.228 |
| <b>Raph1</b>         | 0 | 0        | 0 | 166  | 2.766667 | 0.636628 | 6.864311 | Unclassified | chr1:60540028-60625609    | 83.582  |
| <b>Slc16a14</b>      | 0 | 0        | 0 | 15   | 0.25     | 0.090019 | 2.85357  | Unclassified | chr1:84903279-84933658    | 28.38   |
| <b>H1fx</b>          | 0 | 0        | 0 | 20   | 0.333333 | 5.22223  | 0.533396 | Unclassified | chr6:87930414-87933476    | 1.063   |
| <b>Mtpap</b>         | 0 | 0        | 0 | 447  | 7.45     | 6.27374  | 9.085438 | Unclassified | chr18:4373589-4397328     | 21.74   |
| <b>Gm5584</b>        | 0 | 0        | 0 | 22   | 0.366667 | 0        | 0        | Unclassified | chr7:14495025-14576937    | 79.913  |
| <b>Nrxn1</b>         | 0 | 0        | 0 | 506  | 8.433333 | 0.041114 | 2.033411 | Unclassified | chr17:90432983-91494142   | 1059.16 |
| <b>Nrtn</b>          | 0 | 0        | 0 | 40   | 0.666667 | 0.375845 | 4.895977 | Unclassified | chr17:56890747-56898953   | 6.207   |
| <b>Nrl</b>           | 0 | 0        | 0 | 7    | 0.116667 | 0.703617 | 0        | Unclassified | chr14:56137814-56145802   | 5.989   |
| <b>Lipm</b>          | 0 | 0        | 0 | 14   | 0.233333 | 0.040282 | 0.633543 | Unclassified | chr19:34173432-34197177   | 21.746  |
| <b>Pnmal2</b>        | 0 | 0        | 0 | 4    | 0.066667 | 0.780487 | 0.317872 | Unclassified | chr7:17528030-17532427    | 2.398   |
| <b>Nrf1</b>          | 0 | 0        | 0 | 1754 | 29.23333 | 11.2385  | 32.07572 | Unclassified | chr6:29995987-30103458    | 105.472 |
| <b>Rictor</b>        | 0 | 0        | 0 | 811  | 13.51667 | 1.58429  | 16.81862 | Unclassified | chr15:6656380-6750400     | 92.021  |
| <b>Galntl2</b>       | 0 | 0        | 0 | 52   | 0.866667 | 0.043798 | 0.375208 | Unclassified | chr14:32840288-32871512   | 29.225  |
| <b>Fam122b</b>       | 0 | 0        | 0 | 188  | 3.133333 | 4.30668  | 32.1517  | Stalled      | chrX:50596593-50624982    | 26.39   |
| <b>Drd5</b>          | 0 | 0        | 0 | 5    | 0.083333 | 0.118924 | 4        | Unclassified | chr5:38708747-38713549    | 2.803   |
| <b>Elmo3</b>         | 0 | 0        | 0 | 406  | 6.766667 | 1.29439  | 3.687245 | Unclassified | chr8:107827500-107834522  | 5.023   |
| <b>Sfrs13b</b>       | 0 | 0        | 0 | 27   | 0.45     | 0.143906 | 0.593403 | Unclassified | chr4:33293965-33320315    | 24.351  |
| <b>Trnt1</b>         | 0 | 0        | 0 | 533  | 8.883333 | 14.4187  | 10.44724 | Unclassified | chr6:106717165-106732463  | 13.299  |
| <b>4932418E24Rik</b> | 0 | 0        | 0 | 40   | 0.666667 | 0.056903 | 0.731473 | Unclassified | chr2:26127166-26152077    | 22.912  |
| <b>Spg20</b>         | 0 | 0        | 0 | 343  | 5.716667 | 6.49437  | 18.35724 | Unclassified | chr3:54914029-54941253    | 25.225  |
| <b>Arhgap9</b>       | 0 | 0        | 0 | 169  | 2.816667 | 12.5813  | 1.706138 | Elongating   | chr10:126758782-126766999 | 6.218   |
| <b>Otof</b>          | 0 | 0        | 0 | 136  | 2.266667 | 0.02036  | 0        | Unclassified | chr5:30669350-30766305    | 94.956  |
| <b>1110018J18Rik</b> | 0 | 0        | 0 | 135  | 2.25     | 7.96259  | 15.2215  | Stalled      | chr13:64393143-64416018   | 20.876  |
| <b>Lrtm1</b>         | 0 | 0        | 0 | 17   | 0.283333 | 0.033276 | 0        | Unclassified | chr14:29829393-29846828   | 15.436  |
| <b>6030419C18Rik</b> | 0 | 0        | 0 | 63   | 1.05     | 0.700867 | 2.974424 | Unclassified | chr9:58334409-58347549    | 11.141  |
| <b>Cxxc4</b>         | 0 | 0        | 0 | 10   | 0.166667 | 0.18634  | 1.500268 | Unclassified | chr3:133901111-133925125  | 22.015  |
| <b>Fkbp11</b>        | 0 | 0        | 0 | 72   | 1.2      | 27.0581  | 7.067969 | Unclassified | chr15:98554798-98560629   | 3.832   |
| <b>Chchd1</b>        | 0 | 0        | 0 | 318  | 5.3      | 39.0095  | 49.49164 | Unclassified | chr14:21520248-21523639   | 1.392   |
| <b>Elof1</b>         | 0 | 0        | 0 | 51   | 0.85     | 27.1128  | 1.601508 | Unclassified | chr9:21917432-21920613    | 1.182   |
| <b>H2-Q10</b>        | 0 | 0        | 0 | 12   | 0.2      | 0        | 0.995418 | Unclassified | chr17:35605033-35611508   | 4.476   |
| <b>Gcnt7</b>         | 0 | 0        | 0 | 218  | 3.633333 | 0        | 0.735136 | Unclassified | chr2:172275812-172286096  | 8.285   |
| <b>Htr1f</b>         | 0 | 0        | 0 | 79   | 1.316667 | 0.020433 | 1.411896 | Unclassified | chr16:64924554-65107610   | 181.057 |
| <b>Tmem106c</b>      | 0 | 0        | 0 | 210  | 3.5      | 6.41382  | 30.91585 | Stalled      | chr15:97792709-97800706   | 5.998   |
| <b>Htr1b</b>         | 0 | 0        | 0 | 5    | 0.083333 | 2.58283  | 2        | Unclassified | chr9:81524998-81528159    | 1.162   |
| <b>Htr1a</b>         | 0 | 0        | 0 | 9    | 0.15     | 0.075034 | 1.602918 | Unclassified | chr13:106231772-106238213 | 4.442   |
| <b>H2-Oa</b>         | 0 | 0        | 0 | 154  | 2.566667 | 30.1237  | 1.938225 | Elongating   | chr17:34227323-34232179   | 2.857   |
| <b>Snx6</b>          | 0 | 0        | 0 | 589  | 9.816667 | 10.8879  | 24.71859 | Unclassified | chr12:55847343-55898649   | 49.307  |
| <b>Olf1085</b>       | 0 | 0        | 0 | 0    | 0        | 0.009585 | 0        | Unclassified | chr2:86497673-86500613    | 0.941   |
| <b>Htr2b</b>         | 0 | 0        | 0 | 124  | 2.066667 | 0        | 0.816522 | Unclassified | chr1:87995611-88010545    | 12.935  |
| <b>Nckap5l</b>       | 0 | 0        | 0 | 153  | 2.55     | 0.810518 | 8.757084 | Unclassified | chr15:99252464-99290179   | 35.716  |
| <b>Htr7</b>          | 0 | 0        | 0 | 1783 | 29.71667 | 16.3978  | 10.36832 | Unclassified | chr19:36033218-36133850   | 98.633  |
| <b>Igf2</b>          | 0 | 0        | 0 | 30   | 0.5      | 0.311045 | 2.2952   | Unclassified | chr7:149836672-149848940  | 10.269  |
| <b>D3Erd751e</b>     | 0 | 0        | 0 | 198  | 3.3      | 0.595218 | 75.44757 | Stalled      | chr3:41544539-41562861    | 16.323  |
| <b>Icos</b>          | 0 | 0        | 0 | 16   | 0.266667 | 0.181289 | 0        | Unclassified | chr1:61032757-61057162    | 22.406  |
| <b>Neu3</b>          | 0 | 0        | 0 | 109  | 1.816667 | 2.24538  | 20.42645 | Stalled      | chr7:106959948-106978927  | 16.98   |
| <b>Nek10</b>         | 0 | 0        | 0 | 64   | 1.066667 | 0.019337 | 1.259436 | Unclassified | chr14:15695735-15804174   | 106.44  |
| <b>Mrgpra3</b>       | 0 | 0        | 0 | 5    | 0.083333 | 0.014845 | 0        | Unclassified | chr7:54844319-54858741    | 12.423  |
| <b>Olf1739</b>       | 0 | 0        | 0 | 0    | 0        | 0.030331 | 0        | Unclassified | chr14:51042195-51045125   | 0.931   |
| <b>Mrgpra1</b>       | 0 | 0        | 0 | 9    | 0.15     | 0        | 1.448102 | Unclassified | chr7:54590244-54611610    | 19.367  |
| <b>Fam159b</b>       | 0 | 0        | 0 | 17   | 0.283333 | 1.61345  | 0.540047 | Unclassified | chr13:105635362-105655973 | 18.612  |
| <b>Igfbp1</b>        | 0 | 0        | 0 | 4    | 0.066667 | 0.033727 | 0.652838 | Unclassified | chr11:7095789-7102549     | 4.761   |
| <b>Olf1738</b>       | 0 | 0        | 0 | 1    | 0.016667 | 0.084972 | 1        | Unclassified | chr14:51031220-51034156   | 0.937   |
| <b>Kbtbd2</b>        | 0 | 0        | 0 | 773  | 12.88333 | 3.15033  | 20.31159 | Unclassified | chr6:56727518-56749807    | 20.29   |
| <b>Ttc30a1</b>       | 0 | 0        | 0 | 31   | 0.166667 | 2.49387  | 7.308375 | Unclassified | chr2:75817162-75822024    | 2.863   |
| <b>Megf9</b>         | 0 | 0        | 0 | 212  | 3.533333 | 2.51962  | 83.17953 | Stalled      | chr4:70092960-70197962    | 103.003 |
| <b>Zfp647</b>        | 0 | 0        | 0 | 272  | 4.533333 | 0.416979 | 26.14776 | Stalled      | chr15:76740799-76757878   | 15.08   |
| <b>Spz1</b>          | 0 | 0        | 0 | 6    | 0.1      | 0.048091 | 0.692308 | Unclassified | chr13:93344588-93348187   | 1.6     |
| <b>2510003E04Rik</b> | 0 | 0        | 0 | 368  | 6.133333 | 9.01933  | 32.12691 | Stalled      | chr10:62021217-62043205   | 19.989  |
| <b>Krtap16-9</b>     | 0 | 0        | 0 | 1    | 0.016667 | 0        | 1        | Unclassified | chr16:88869162-88871655   | 0.494   |
| <b>Krtap16-7</b>     | 0 | 0        | 0 | 0    | 0        | 0        | 0        | Unclassified | chr16:89403271-89406019   | 0.749   |
| <b>Ralbp1</b>        | 0 | 0        | 0 | 123  | 2.05     | 13.3459  | 1.411175 | Unclassified | chr17:66197770-66219171   | 19.402  |
| <b>Htatsf1</b>       | 0 | 0        | 0 | 334  | 5.566667 | 11.8473  | 46.84276 | Stalled      | chrX:54304791-54320359    | 13.569  |
| <b>Gm4861</b>        | 0 | 0        | 0 | 3    | 0.05     | 0        | 0.612253 | Unclassified | chr3:137213008-137217586  | 2.579   |
| <b>Cops6</b>         | 0 | 0        | 0 | 463  | 7.716667 | 81.598   | 1.490011 | Elongating   | chr5:138600329-138605212  | 2.884   |
| <b>Gm6957</b>        | 0 | 0        | 0 | 12   | 0.2      | 0        | 0.758209 | Unclassified | chr7:14807825-14842182    | 32.358  |
| <b>Pak2</b>          | 0 | 0        | 0 | 1101 | 18.35    | 13.1961  | 15.97828 | Unclassified | chr16:32017948-32081359   | 61.412  |

|               |   |         |   |      |          |          |          |              |                           |          |
|---------------|---|---------|---|------|----------|----------|----------|--------------|---------------------------|----------|
| Rit1          | 0 | 0       | 0 | 210  | 3.5      | 6.23563  | 6.970592 | Unclassified | chr3:88518775-88534970    | 14.196   |
| Olfr1395      | 0 | 0       | 0 | 3    | 0.05     | 0        | 2        | Unclassified | chr11:48959760-48962714   | 0.955    |
| 1810049H13Rik | 0 | 0       | 0 | 321  | 5.35     | 9.99726  | 7.392475 | Unclassified | chr11:120317917-120321377 | 1.461    |
| Olfr908       | 0 | 0       | 0 | 1    | 0.016667 | 0        | 0        | Unclassified | chr9:38321618-38324550    | 0.933    |
| Chchd7        | 0 | 0       | 0 | 237  | 3.95     | 16.9833  | 46.30323 | Stalled      | chr4:3864060-3870670      | 4.611    |
| Msx2          | 0 | 0       | 0 | 11   | 0.183333 | 0.100776 | 1.485002 | Unclassified | chr13:53562249-53570149   | 5.901    |
| Ero11         | 0 | 0       | 0 | 445  | 7.416667 | 11.7513  | 31.50611 | Unclassified | chr14:45903995-45940202   | 34.208   |
| Olfr330       | 0 | 0       | 0 | 1    | 0.016667 | 0.01908  | 1        | Unclassified | chr11:58342538-58345486   | 0.949    |
| Spag6         | 0 | 0       | 0 | 48   | 0.8      | 0.756206 | 3.852541 | Unclassified | chr16:16753109-16831456   | 76.348   |
| Sall2         | 0 | 0       | 0 | 68   | 1.133333 | 0.258813 | 0.607098 | Unclassified | chr14:52930855-52950345   | 17.491   |
| Rab12         | 0 | 0       | 0 | 465  | 7.75     | 3.8573   | 5.013463 | Unclassified | chr17:66843851-66871010   | 25.16    |
| Rab17         | 0 | 0       | 0 | 40   | 0.666667 | 0.408346 | 2.655997 | Unclassified | chr1:92854710-92868197    | 11.488   |
| Mstn          | 0 | 0       | 0 | 6    | 0.1      | 0.009557 | 1.287242 | Unclassified | chr1:53116506-53124923    | 6.418    |
| Maml1         | 0 | 0       | 0 | 936  | 15.6     | 5.97071  | 19.51138 | Unclassified | chr11:50069136-50107838   | 36.703   |
| Rbp7          | 0 | 0       | 0 | 15   | 0.25     | 0        | 1.930057 | Unclassified | chr4:148823810-148831077  | 5.268    |
| Msx1          | 0 | 0       | 0 | 8    | 0.133333 | 0.188301 | 0.436302 | Unclassified | chr5:38211729-38217824    | 4.096    |
| Tmprss13      | 0 | 0       | 0 | 61   | 1.016667 | 0.264592 | 0.98759  | Unclassified | chr9:45125182-45156663    | 28.482   |
| Epc2          | 0 | 0       | 0 | 1114 | 18.56667 | 6.01759  | 29.6991  | Unclassified | chr2:49305005-49407129    | 100.125  |
| Uxt           | 0 | 0       | 0 | 187  | 3.116667 | 6.25341  | 19.44581 | Stalled      | chrX:20528790-20541104    | 10.315   |
| V1ra1         | 0 | 0       | 0 | 4    | 0.066667 | 0.022836 | 0        | Unclassified | chr6:90070636-90080639    | 8.004    |
| V1ra2         | 0 | 0       | 0 | 1    | 0.016667 | 0.012627 | 0        | Unclassified | chr6:89881643-89892501    | 8.859    |
| Uty           | 0 | 0       | 0 | 656  | 10.93333 | 1.37257  | 14.01621 | Stalled      | chrY:433586-584181        | 148.596  |
| Ccng2         | 0 | 20.9557 | 0 | 278  | 4.633333 | 7.62393  | 13.78962 | Stalled      | chr5:93694598-93705257    | 8.66     |
| Slc45a2       | 0 | 0       | 0 | 18   | 0.3      | 0.021482 | 0.647175 | Unclassified | chr15:10928475-10958988   | 28.514   |
| Atad2b        | 0 | 0       | 0 | 1318 | 21.96667 | 3.52362  | 27.187   | Unclassified | chr12:4922158-5054216     | 130.059  |
| Slc27a2       | 0 | 0       | 0 | 48   | 0.8      | 0.439867 | 0.886313 | Unclassified | chr2:126376759-126413979  | 35.221   |
| Slc27a5       | 0 | 0       | 0 | 18   | 0.3      | 0.027515 | 0.809905 | Unclassified | chr7:13573695-13585541    | 9.847    |
| Sema4g        | 0 | 0       | 0 | 178  | 2.966667 | 0.300825 | 0.518997 | Unclassified | chr19:45061833-45077885   | 14.053   |
| Pcgf1         | 0 | 0       | 0 | 199  | 3.316667 | 7.01047  | 13.26631 | Stalled      | chr6:83026383-83030849    | 2.467    |
| Pla2g12b      | 0 | 0       | 0 | 63   | 1.05     | 0        | 0.226666 | Unclassified | chr10:58864432-58884724   | 18.293   |
| Pkn3          | 0 | 0       | 0 | 219  | 3.65     | 0.721346 | 0.936495 | Unclassified | chr2:29932285-29946539    | 12.255   |
| Vangl1        | 0 | 0       | 0 | 60   | 1        | 0.137686 | 1.861323 | Unclassified | chr3:101960620-102010616  | 47.997   |
| Olfr1044      | 0 | 0       | 0 | 1    | 0.016667 | 0        | 1        | Unclassified | chr2:86011027-86013972    | 0.946    |
| Insm1         | 0 | 0       | 0 | 695  | 11.58333 | 9.61849  | 3.855031 | Unclassified | chr2:146045732-146050752  | 3.021    |
| 5430405G05Rik | 0 | 0       | 0 | 12   | 0.2      | 0.465073 | 1.252766 | Unclassified | chr2:151525743-151533044  | 5.302    |
| Tex10         | 0 | 0       | 0 | 598  | 9.966667 | 5.99743  | 21.61105 | Unclassified | chr4:48443827-48488294    | 42.468   |
| Cdon          | 0 | 0       | 0 | 238  | 3.966667 | 0.776321 | 1.158859 | Unclassified | chr9:35257660-35315237    | 55.578   |
| Gm609         | 0 | 0       | 0 | 41   | 0.683333 | 0.024159 | 0        | Unclassified | chr16:45416867-45495082   | 76.216   |
| Fam180a       | 0 | 0       | 0 | 22   | 0.366667 | 0.041938 | 1.18454  | Unclassified | chr6:35262745-35278141    | 13.397   |
| 1100001E04Rik | 0 | 0       | 0 | 14   | 0.233333 | 0.04639  | 1.447264 | Unclassified | chrX:46821626-46853427    | 29.802   |
| Slitrk5       | 0 | 0       | 0 | 6    | 0.1      | 0.154638 | 1.401317 | Unclassified | chr14:112072336-112082357 | 8.022    |
| Ifna4         | 0 | 0       | 0 | 0    | 0        | 0.139308 | 0        | Unclassified | chr4:88485719-88488363    | 0.645    |
| Dao           | 0 | 0       | 0 | 36   | 0.6      | 0.127265 | 0.815072 | Unclassified | chr5:114451834-114475469  | 21.636   |
| Slc9a10       | 0 | 0       | 0 | 68   | 1.133333 | 0.016705 | 0        | Unclassified | chr16:45533421-45607114   | 71.694   |
| Chst10        | 0 | 0       | 0 | 409  | 6.816667 | 7.07216  | 9.016278 | Unclassified | chr1:38920717-38957005    | 34.289   |
| Aim2          | 0 | 0       | 0 | 479  | 7.983333 | 5.1349   | 3.884463 | Unclassified | chr1:175348734-175396167  | 45.434   |
| Ifna6         | 0 | 0       | 0 | 1    | 0.016667 | 0.004624 | 1        | Unclassified | chr4:88471319-88473889    | 0.571    |
| Zfp85-rs1     | 0 | 0       | 0 | 49   | 0.816667 | 0.528226 | 13.57493 | Stalled      | chr13:67848736-67858071   | 7.336    |
| 9130221D24Rik | 0 | 0       | 0 | 43   | 0.716667 | 0.053681 | 1.289182 | Unclassified | chr3:132822494-132899853  | 75.36    |
| Olfr1337      | 0 | 0       | 0 | 6    | 0.1      | 0.013519 | 4        | Unclassified | chr4:118454240-118457188  | 0.949    |
| Olfr493       | 0 | 0       | 0 | 0    | 0        | 0.02706  | 0        | Unclassified | chr7:115489548-115492493  | 0.946    |
| Ferd3l        | 0 | 0       | 0 | 5    | 0.083333 | 0.057927 | 2        | Unclassified | chr12:34611289-34614174   | 0.886    |
| Olfr1356      | 0 | 0       | 0 | 3    | 0.05     | 0.026618 | 3        | Unclassified | chr10:78309695-78312658   | 0.964    |
| Olfr518       | 0 | 0       | 0 | 1    | 0.016667 | 0.063954 | 1        | Unclassified | chr7:116024116-116027118  | 1.003    |
| Olfr1340      | 0 | 0       | 0 | 2    | 0.033333 | 0        | 0        | Unclassified | chr4:118396853-118399801  | 0.949    |
| Hisppd2a      | 0 | 0       | 0 | 93   | 1.55     | 2.37642  | 0.604872 | Unclassified | chr2:121136296-121178749  | 40.454   |
| Lrrn4         | 0 | 0       | 0 | 43   | 0.716667 | 0.767033 | 0.719017 | Unclassified | chr2:132694251-132708598  | 12.348   |
| Tprkb         | 0 | 0       | 0 | 303  | 5.05     | 4.50038  | 15.35009 | Unclassified | chr6:85863712-85880277    | 14.566   |
| Ceacam13      | 0 | 0       | 0 | 8    | 0.133333 | 0.040644 | 2.027001 | Unclassified | chr7:18593237-18604569    | 9.333    |
| Olfr657       | 0 | 0       | 0 | 0    | 0        | 0        | 0        | Unclassified | chr7:111782189-111785141  | 0.953    |
| Dera          | 0 | 0       | 0 | 677  | 11.28333 | 17.3696  | 40.20996 | Unclassified | chr6:137701097-137786393  | 83.297   |
| Olfr829       | 0 | 0       | 0 | 0    | 0        | 0        | 0        | Unclassified | chr9:18659070-18662036    | 0.967    |
| Gm829         | 0 | 0       | 0 | 57   | 0.95     | 0        | 1.273972 | Unclassified | chr4:45694460-45736578    | 40.119   |
| Zfp119        | 0 | 0       | 0 | 214  | 3.566667 | 0.893402 | 28.64662 | Stalled      | chr17:56004191-56020195   | 14.005   |
| Tmem65        | 0 | 0       | 0 | 399  | 6.65     | 1.99049  | 56.69873 | Stalled      | chr15:58613823-58656982   | 41.16    |
| Fam166b       | 0 | 0       | 0 | 18   | 0.3      | 0.423146 | 0.169895 | Unclassified | chr4:43439893-43444006    | 2.114    |
| Zfp871        | 0 | 0       | 0 | 607  | 10.11667 | 2.89973  | 9.121934 | Unclassified | chr17:32902441-32927232   | 22.792   |
| Olfr641       | 0 | 0       | 0 | 1    | 0.016667 | 0.054596 | 0        | Unclassified | chr7:111186311-111189250  | 0.94     |
| Defb44        | 0 | 0       | 0 | 6    | 0.1      | 0        | 0        | Unclassified | chr1:18200133-18215645    | 13.513   |
| D730048I06Rik | 0 | 0       | 0 | 0    | 0        | 0.019215 | 0        | Unclassified | chr9:35595634-35599697    | 2.064    |
| Fam131c       | 0 | 0       | 0 | 34   | 0.566667 | 0.330669 | 0        | Unclassified | chr4:140922134-140940090  | 15.957   |
| Galnt11       | 0 | 0       | 0 | 466  | 7.766667 | 3.43428  | 21.58657 | Unclassified | chr5:24726710-24771736    | 43.027   |
| Gpbar1        | 0 | 0       | 0 | 94   | 1.566667 | 0.038837 | 48       | Unclassified | chr1:74323173-74326163    | 0.991    |
| Gm694         | 0 | 0       | 0 | 10   | 0.166667 | 0        | 1.074598 | Unclassified | chr4:140988817-140994020  | 3.204    |
| Lrrtm4        | 0 | 0       | 0 | 7    | 0.116667 | 0.038848 | 1.005668 | Unclassified | chr6:79966870-79974926    | 6.057    |
| Dmd           | 0 | 0       | 0 | 421  | 7.016667 | 0.024246 | 0        | Unclassified | chrX:80192208-82450389    | 2256.182 |
| Dmc1          | 0 | 0       | 0 | 57   | 0.95     | 0.140325 | 3.442843 | Unclassified | chr15:79391929-79437514   | 43.586   |
| Gm88          | 0 | 0       | 0 | 193  | 3.216667 | 1.25915  | 4.16952  | Unclassified | chr17:46389113-46394265   | 3.153    |
| Dmp1          | 0 | 0       | 0 | 15   | 0.25     | 0.102159 | 1.399075 | Unclassified | chr5:104629635-104643121  | 11.487   |
| Tmc1          | 0 | 0       | 0 | 99   | 1.65     | 0.031467 | 0        | Unclassified | chr19:20857947-21030692   | 170.746  |
| Abcd1         | 0 | 0       | 0 | 481  | 8.016667 | 13.8046  | 19.94367 | Unclassified | chrX:70959935-70983626    | 21.692   |
| Phldb3        | 0 | 0       | 0 | 321  | 5.35     | 7.82283  | 6.562966 | Unclassified | chr7:25394346-25414316    | 17.971   |
| Lhx9          | 0 | 0       | 0 | 56   | 0.933333 | 1.6519   | 1.251261 | Unclassified | chr1:140721762-140746156  | 22.395   |
| Clec2l        | 0 | 0       | 0 | 41   | 0.683333 | 0.215151 | 1.984015 | Unclassified | chr6:38611068-38630864    | 17.797   |
| C1qtnf5       | 0 | 0       | 0 | 108  | 1.8      | 0.114814 | 1.09761  | Elongating   | chr9:43913328-43917270    | 1.943    |
| Sgcz          | 0 | 0       | 0 | 387  | 6.45     | 0.080471 | 0        | Unclassified | chr8:38585607-39726562    | 1138.956 |

|                      |   |   |   |      |          |          |          |              |                           |         |
|----------------------|---|---|---|------|----------|----------|----------|--------------|---------------------------|---------|
| <b>Aldh1a1</b>       | 0 | 0 | 0 | 23   | 0.383333 | 0.047297 | 0        | Unclassified | chr19:20674471-20717952   | 41.482  |
| <b>Olr1</b>          | 0 | 0 | 0 | 17   | 0.283333 | 0.043104 | 0        | Unclassified | chr6:129435265-129459183  | 21.919  |
| <b>Olf1212</b>       | 0 | 0 | 0 | 3    | 0.05     | 0.041078 | 3        | Unclassified | chr2:88796624-88799560    | 0.937   |
| <b>Adamts9</b>       | 0 | 0 | 0 | 86   | 1.433333 | 0.01274  | 0        | Unclassified | chr6:92722692-92853435    | 128.744 |
| <b>Smr2</b>          | 0 | 0 | 0 | 9    | 0.15     | 0        | 0        | Unclassified | chr5:88513580-88538078    | 22.499  |
| <b>Sms</b>           | 0 | 0 | 0 | 595  | 9.916667 | 6.81017  | 13.48269 | Unclassified | chrX:153881885-153931978  | 48.094  |
| <b>Sstr1</b>         | 0 | 0 | 0 | 14   | 0.233333 | 0.231788 | 0.212288 | Unclassified | chr12:59310790-59317023   | 4.234   |
| <b>Sst</b>           | 0 | 0 | 0 | 2    | 0.033333 | 0        | 1        | Unclassified | chr16:23889666-23892930   | 1.265   |
| <b>Sstr2</b>         | 0 | 0 | 0 | 6    | 0.1      | 0        | 5        | Unclassified | chr11:113483570-113486950 | 1.381   |
| <b>Sstr5</b>         | 0 | 0 | 0 | 12   | 0.2      | 0.061754 | 0.414824 | Unclassified | chr17:25626819-25636198   | 7.38    |
| <b>Sstr4</b>         | 0 | 0 | 0 | 11   | 0.183333 | 2.19684  | 2.240461 | Unclassified | chr2:148219112-148222500  | 1.389   |
| <b>Dlgap4</b>        | 0 | 0 | 0 | 578  | 9.633333 | 6.21262  | 19.65425 | Unclassified | chr2:156544720-156590099  | 43.38   |
| <b>Irx6</b>          | 0 | 0 | 0 | 7    | 0.116667 | 0.06462  | 0.700599 | Unclassified | chr8:95196300-95203979    | 5.68    |
| <b>Umod1</b>         | 0 | 0 | 0 | 100  | 1.666667 | 0.033038 | 1.100367 | Unclassified | chr17:31089627-31147655   | 56.029  |
| <b>Pri3d3</b>        | 0 | 0 | 0 | 1    | 0.016667 | 0.039889 | 0        | Unclassified | chr13:27246667-27254389   | 5.723   |
| <b>Abi1</b>          | 0 | 0 | 0 | 1004 | 16.73333 | 16.0476  | 29.94928 | Unclassified | chr2:22795508-22897760    | 100.253 |
| <b>Ndufs6</b>        | 0 | 0 | 0 | 317  | 5.283333 | 56.9298  | 9.613321 | Unclassified | chr13:73457323-73467903   | 8.581   |
| <b>Taf9b</b>         | 0 | 0 | 0 | 158  | 2.633333 | 2.02529  | 21.42845 | Stalled      | chrX:103402214-103417181  | 12.968  |
| <b>Tacr1</b>         | 0 | 0 | 0 | 135  | 2.25     | 0.038288 | 0.542661 | Unclassified | chr6:82350468-82510093    | 157.626 |
| <b>Gm5105</b>        | 0 | 0 | 0 | 24   | 0.4      | 0.053882 | 0.912734 | Unclassified | chr3:137711724-137732352  | 18.629  |
| <b>Gm5531</b>        | 0 | 0 | 0 | 9    | 0.15     | 0.012661 | 0.234069 | Unclassified | chr1:155719474-155724001  | 2.528   |
| <b>Prkaca</b>        | 0 | 0 | 0 | 295  | 4.916667 | 12.56669 | 18.27359 | Stalled      | chr8:86494876-86520344    | 23.469  |
| <b>Zcchc11</b>       | 0 | 0 | 0 | 1019 | 16.98333 | 6.77564  | 21.29903 | Unclassified | chr4:108130030-108232020  | 99.991  |
| <b>Suv39h1</b>       | 0 | 0 | 0 | 491  | 8.183333 | 11.6322  | 6.861791 | Unclassified | chrX:7638296-7653886      | 13.591  |
| <b>Sva</b>           | 0 | 0 | 0 | 1    | 0.016667 | 0        | 0        | Unclassified | chr6:41986392-41992849    | 4.458   |
| <b>Olf1594</b>       | 0 | 0 | 0 | 1    | 0.016667 | 0.027385 | 1        | Unclassified | chr7:110366233-110369169  | 0.937   |
| <b>Ccdc85a</b>       | 0 | 0 | 0 | 81   | 1.35     | 0.061863 | 0        | Unclassified | chr11:28285691-28486296   | 198.606 |
| <b>Gm13023</b>       | 0 | 0 | 0 | 1    | 0.016667 | 0.0238   | 0        | Unclassified | chr4:143377236-143385487  | 6.252   |
| <b>Efemp1</b>        | 0 | 0 | 0 | 41   | 0.683333 | 0        | 0.644571 | Unclassified | chr11:28751204-28826743   | 73.54   |
| <b>AU015228</b>      | 0 | 0 | 0 | 4    | 0.066667 | 0.785443 | 0.397953 | Unclassified | chr2:129924129-129929111  | 2.983   |
| <b>Lhfp12</b>        | 0 | 0 | 0 | 186  | 3.1      | 0.518784 | 3.039604 | Unclassified | chr13:94825750-94965364   | 137.615 |
| <b>Olf1228</b>       | 0 | 0 | 0 | 0    | 0        | 0        | 0        | Unclassified | chr2:86322955-86325897    | 0.943   |
| <b>Grhl2</b>         | 0 | 0 | 0 | 141  | 2.35     | 0.056901 | 0        | Unclassified | chr15:37160790-37293321   | 130.532 |
| <b>Tpcn1</b>         | 0 | 0 | 0 | 352  | 5.866667 | 2.40815  | 12.51131 | Stalled      | chr5:120984165-121040622  | 54.458  |
| <b>Ccdc104</b>       | 0 | 0 | 0 | 303  | 5.05     | 6.8911   | 6.506473 | Unclassified | chr11:29121535-29149272   | 25.738  |
| <b>Ssx2ip</b>        | 0 | 0 | 0 | 99   | 1.65     | 1.44793  | 14.31544 | Stalled      | chr3:146065650-146103101  | 35.452  |
| <b>Gal3st4</b>       | 0 | 0 | 0 | 73   | 1.216667 | 0.340472 | 0.177819 | Unclassified | chr5:138706152-138715982  | 7.831   |
| <b>Trappc6b</b>      | 0 | 0 | 0 | 556  | 9.266667 | 19.3079  | 21.0371  | Unclassified | chr12:60144078-60164448   | 18.371  |
| <b>Aifm2</b>         | 0 | 0 | 0 | 80   | 1.333333 | 2.16568  | 2.225734 | Unclassified | chr10:61176010-61202008   | 23.999  |
| <b>Krtap7-1</b>      | 0 | 0 | 0 | 0    | 0        | 0        | 0        | Unclassified | chr16:89507948-89510568   | 0.621   |
| <b>Abca4</b>         | 0 | 0 | 0 | 172  | 2.866667 | 0.024756 | 0        | Unclassified | chr3:121745377-121882979  | 135.603 |
| <b>Dio3</b>          | 0 | 0 | 0 | 4    | 0.066667 | 0.06861  | 2        | Unclassified | chr12:111515439-111519307 | 1.869   |
| <b>Krtap16-10</b>    | 0 | 0 | 0 | 1    | 0.016667 | 0        | 1        | Unclassified | chr16:88962548-88965118   | 0.571   |
| <b>Trpm7</b>         | 0 | 0 | 0 | 705  | 11.75    | 3.29764  | 54.40677 | Stalled      | chr2:126617293-126703997  | 84.705  |
| <b>Pmaip1</b>        | 0 | 0 | 0 | 1328 | 22.13333 | 7.62668  | 5.976883 | Unclassified | chr18:66616257-66625212   | 6.956   |
| <b>Kcnmb4</b>        | 0 | 0 | 0 | 90   | 1.5      | 4.28042  | 6.576887 | Unclassified | chr10:115854923-115912579 | 55.657  |
| <b>Cdc42ep5</b>      | 0 | 0 | 0 | 14   | 0.233333 | 0.63785  | 0        | Unclassified | chr7:4102861-4118301      | 13.441  |
| <b>Gm4906</b>        | 0 | 0 | 0 | 1    | 0.016667 | 0        | 0        | Unclassified | chrX:10902947-10905277    | 0.331   |
| <b>Calcr</b>         | 0 | 0 | 0 | 55   | 0.916667 | 0.026763 | 1.209272 | Unclassified | chr6:3635719-3716713      | 78.995  |
| <b>BC023829</b>      | 0 | 0 | 0 | 87   | 1.45     | 4.05857  | 18.42652 | Stalled      | chrX:67713230-67732218    | 16.989  |
| <b>Olf1462</b>       | 0 | 0 | 0 | 1    | 0.016667 | 0.041078 | 0        | Unclassified | chr11:87702460-87705396   | 0.937   |
| <b>Spocd1</b>        | 0 | 0 | 0 | 29   | 0.483333 | 0.041477 | 1.00545  | Unclassified | chr4:129622964-129634357  | 9.394   |
| <b>Orm2</b>          | 0 | 0 | 0 | 186  | 3.1      | 0.209232 | 1.630325 | Elongating   | chr4:63021482-63026911    | 3.343   |
| <b>Car8</b>          | 0 | 0 | 0 | 72   | 1.2      | 0.062715 | 0.579706 | Unclassified | chr4:8068639-8168188      | 97.55   |
| <b>2610018G03Rik</b> | 0 | 0 | 0 | 157  | 2.616667 | 4.51081  | 31.7458  | Stalled      | chrX:48192612-48245027    | 50.416  |
| <b>Crhbp</b>         | 0 | 0 | 0 | 34   | 0.566667 | 0.678344 | 2.606301 | Unclassified | chr13:96201330-96216786   | 13.457  |
| <b>Megf10</b>        | 0 | 0 | 0 | 175  | 2.916667 | 0.066527 | 2.47715  | Unclassified | chr18:57291128-57457120   | 163.993 |
| <b>Prkaa2</b>        | 0 | 0 | 0 | 64   | 1.066667 | 0.123459 | 6.084453 | Unclassified | chr4:104702254-104784503  | 80.25   |
| <b>Wdr20b</b>        | 0 | 0 | 0 | 3    | 0.05     | 0.565311 | 2        | Unclassified | chr12:66324503-66329441   | 2.939   |
| <b>Prss48</b>        | 0 | 0 | 0 | 9    | 0.15     | 0        | 2.423086 | Unclassified | chr3:85797731-85808413    | 8.683   |
| <b>Lce3f</b>         | 0 | 0 | 0 | 1    | 0.016667 | 0.004314 | 1        | Unclassified | chr3:92794147-92797348    | 1.202   |
| <b>Gm5465</b>        | 0 | 0 | 0 | 121  | 2.016667 | 2.3799   | 9.724966 | Unclassified | chr14:79849641-79854623   | 2.983   |
| <b>Ms4a5</b>         | 0 | 0 | 0 | 17   | 0.283333 | 0        | 0.389952 | Unclassified | chr19:11348355-11360303   | 9.949   |
| <b>Cpsf7</b>         | 0 | 0 | 0 | 879  | 14.65    | 16.7017  | 17.62883 | Unclassified | chr19:10597733-10622224   | 22.492  |
| <b>Sntg1</b>         | 0 | 0 | 0 | 319  | 5.316667 | 0.033623 | 2.244647 | Unclassified | chr1:8352741-9291811      | 937.071 |
| <b>Abcc6</b>         | 0 | 0 | 0 | 112  | 1.866667 | 0.082719 | 12.03293 | Stalled      | chr7:53231749-53287656    | 53.908  |
| <b>Gtf3a</b>         | 0 | 0 | 0 | 522  | 8.7      | 25.9382  | 7.351636 | Unclassified | chr5:147758232-147767190  | 6.959   |
| <b>Srbd1</b>         | 0 | 0 | 0 | 1267 | 21.11667 | 5.67053  | 15.32198 | Unclassified | chr17:86384004-86546515   | 160.512 |
| <b>Dock1</b>         | 0 | 0 | 0 | 479  | 7.983333 | 0.078933 | 1.027598 | Unclassified | chr7:141860369-142365330  | 502.962 |
| <b>Tssk4</b>         | 0 | 0 | 0 | 41   | 0.683333 | 0.362628 | 1.036232 | Unclassified | chr14:56267018-56271369   | 2.352   |
| <b>Utp23</b>         | 0 | 0 | 0 | 266  | 4.433333 | 6.42273  | 18.40207 | Unclassified | chr15:51706986-51716168   | 7.183   |
| <b>Zfp579</b>        | 0 | 0 | 0 | 63   | 1.05     | 4.57057  | 5.956126 | Unclassified | chr7:4944453-4949703      | 3.251   |
| <b>Calhm1</b>        | 0 | 0 | 0 | 13   | 0.216667 | 0        | 4.08978  | Unclassified | chr19:47215524-47220664   | 3.141   |
| <b>1110018G07Rik</b> | 0 | 0 | 0 | 578  | 9.633333 | 7.12084  | 27.51665 | Unclassified | chr12:86259098-86313836   | 52.739  |
| <b>Tspan11</b>       | 0 | 0 | 0 | 85   | 1.416667 | 0.030365 | 1.328875 | Unclassified | chr6:127835639-127903049  | 65.411  |
| <b>Cyp26c1</b>       | 0 | 0 | 0 | 88   | 1.466667 | 1.02847  | 1.003993 | Unclassified | chr19:37758169-37767797   | 7.629   |
| <b>Arsi</b>          | 0 | 0 | 0 | 48   | 0.8      | 0.401699 | 4.021305 | Unclassified | chr18:61069893-61077422   | 5.53    |
| <b>Espl1</b>         | 0 | 0 | 0 | 499  | 8.316667 | 11.9602  | 10.21011 | Unclassified | chr15:102124723-102154787 | 28.065  |
| <b>Cyfp1p1</b>       | 0 | 0 | 0 | 715  | 11.91667 | 4.14044  | 11.42456 | Unclassified | chr7:63095440-63188003    | 90.564  |
| <b>Klb</b>           | 0 | 0 | 0 | 52   | 0.866667 | 0.040994 | 0.837688 | Unclassified | chr5:65737649-65775242    | 35.594  |
| <b>Sema3c</b>        | 0 | 0 | 0 | 61   | 1.016667 | 0.046558 | 0        | Unclassified | chr5:17078633-17236085    | 155.453 |
| <b>Catsperb</b>      | 0 | 0 | 0 | 75   | 1.25     | 0.017228 | 0.75114  | Unclassified | chr12:102640882-102864219 | 221.338 |
| <b>Sema3e</b>        | 0 | 0 | 0 | 83   | 1.383333 | 0.039176 | 2.988376 | Unclassified | chr5:14023275-14256689    | 231.415 |
| <b>Centp</b>         | 0 | 0 | 0 | 194  | 3.233333 | 10.5866  | 14.35055 | Stalled      | chr8:108368577-108377908  | 7.332   |
| <b>Dfnb59</b>        | 0 | 0 | 0 | 6    | 0.1      | 0.231304 | 0        | Unclassified | chr2:76486329-76496613    | 8.285   |
| <b>Sp9</b>           | 0 | 0 | 0 | 34   | 0.566667 | 0.571707 | 0.102173 | Unclassified | chr2:73107982-73113826    | 3.845   |



|               |   |   |   |      |          |          |          |              |                           |         |
|---------------|---|---|---|------|----------|----------|----------|--------------|---------------------------|---------|
| Gm1631        | 0 | 0 | 0 | 14   | 0.233333 | 0.079977 | 0.935746 | Unclassified | chr2:71555473-71569023    | 11.551  |
| Apol9b        | 0 | 0 | 0 | 7    | 0.116667 | 0.034248 | 0.512631 | Unclassified | chr15:77557501-77566811   | 7.311   |
| Defb10        | 0 | 0 | 0 | 1    | 0.016667 | 0        | 1        | Unclassified | chr8:22967372-22972482    | 3.111   |
| Olfr845       | 0 | 0 | 0 | 0    | 0        | 0        | 0        | Unclassified | chr9:19140902-19143842    | 0.941   |
| Cdrt4         | 0 | 0 | 0 | 25   | 0.416667 | 0.070906 | 0        | Unclassified | chr11:62762694-62806597   | 41.904  |
| Atp6v1c1      | 0 | 0 | 0 | 353  | 5.883333 | 13.3766  | 16.11096 | Unclassified | chr15:38589658-38622199   | 30.542  |
| Aqp11         | 0 | 0 | 0 | 112  | 1.866667 | 3.53828  | 7.208833 | Unclassified | chr7:104874888-104888757  | 11.87   |
| Lypd6b        | 0 | 0 | 0 | 126  | 2.1      | 0.022436 | 2.286706 | Unclassified | chr2:49641205-49804366    | 161.162 |
| Pitx2         | 0 | 0 | 0 | 44   | 0.733333 | 0.699524 | 0.670834 | Unclassified | chr3:128900835-128922508  | 19.674  |
| 4930547C10Rik | 0 | 0 | 0 | 6    | 0.1      | 0.02669  | 0        | Unclassified | chr4:52607145-52625035    | 15.891  |
| Toe1          | 0 | 0 | 0 | 433  | 7.216667 | 10.2027  | 8.940344 | Unclassified | chr4:116476607-116482164  | 3.558   |
| Rbm28         | 0 | 0 | 0 | 631  | 10.51667 | 11.9357  | 12.71391 | Unclassified | chr6:29073572-29116724    | 41.153  |
| Arih1         | 0 | 0 | 0 | 1421 | 23.68333 | 11.6789  | 29.73795 | Unclassified | chr9:59236360-59336181    | 97.822  |
| Setd3         | 0 | 0 | 0 | 912  | 15.2     | 13.343   | 10.45947 | Unclassified | chr12:109344640-109419494 | 72.855  |
| Tmprss11a     | 0 | 0 | 0 | 21   | 0.35     | 0.019294 | 0        | Unclassified | chr5:86839434-86900015    | 58.582  |
| Rps20         | 0 | 0 | 0 | 587  | 9.783333 | 609.344  | 5.946356 | Unclassified | chr4:3761619-3764747      | 1.129   |
| Sult1e1       | 0 | 0 | 0 | 9    | 0.15     | 0        | 1.353199 | Unclassified | chr5:88004992-88022636    | 15.645  |
| Olfr262       | 0 | 0 | 0 | 2    | 0.033333 | 0.013617 | 1        | Unclassified | chr19:12315210-12318149   | 0.94    |
| Olfr1436      | 0 | 0 | 0 | 1    | 0.016667 | 0.006758 | 1        | Unclassified | chr19:12372674-12375620   | 0.947   |
| Olfr235       | 0 | 0 | 0 | 0    | 0        | 0.006823 | 0        | Unclassified | chr19:12340721-12343658   | 0.938   |
| Olfr1454      | 0 | 0 | 0 | 1    | 0.016667 | 0        | 1        | Unclassified | chr19:13135902-13138826   | 0.925   |
| Stfa3         | 0 | 0 | 0 | 4    | 0.066667 | 0        | 0.562491 | Unclassified | chr16:36450622-36457478   | 4.857   |
| Olfr1472      | 0 | 0 | 0 | 1    | 0.016667 | 0        | 0        | Unclassified | chr19:13528060-13531005   | 0.946   |
| Olfr1459      | 0 | 0 | 0 | 1    | 0.016667 | 0        | 1        | Unclassified | chr19:13220223-13223147   | 0.925   |
| Gm941         | 0 | 0 | 0 | 221  | 3.683333 | 0.282677 | 0.538301 | Unclassified | chr17:80704746-80788028   | 81.283  |
| Fam82a1       | 0 | 0 | 0 | 282  | 4.7      | 1.00283  | 46.58931 | Stalled      | chr17:80012239-80081492   | 67.254  |
| Stfa2         | 0 | 0 | 0 | 2    | 0.033333 | 0        | 0        | Unclassified | chr16:36404031-36410449   | 4.419   |
| Fbxo40        | 0 | 0 | 0 | 161  | 2.683333 | 0.183094 | 0.21283  | Unclassified | chr16:36966158-36981222   | 13.065  |
| Tdpoz1        | 0 | 0 | 0 | 1    | 0.016667 | 0.017848 | 0        | Unclassified | chr3:93473254-93482205    | 6.952   |
| V1rj3         | 0 | 0 | 0 | 0    | 0        | 0        | 0        | Unclassified | chr7:13696637-13672564    | 0.928   |
| Gdap1         | 0 | 0 | 0 | 13   | 0.216667 | 0.052178 | 3.593926 | Unclassified | chr1:17133453-17154344    | 18.892  |
| Gda           | 0 | 0 | 0 | 74   | 1.233333 | 0.134859 | 4.392358 | Unclassified | chr19:21465796-21549151   | 81.356  |
| Gm6878        | 0 | 0 | 0 | 8    | 0.133333 | 0.012702 | 1.915009 | Unclassified | chr14:67923724-67935548   | 9.825   |
| Hsd3b3        | 0 | 0 | 0 | 7    | 0.116667 | 0.023214 | 0        | Unclassified | chr3:98545398-98568333    | 20.936  |
| V1rh2         | 0 | 0 | 0 | 0    | 0        | 0        | 0        | Unclassified | chr13:22193595-22196534   | 0.94    |
| My17          | 0 | 0 | 0 | 17   | 0.283333 | 0.173781 | 0.411591 | Unclassified | chr11:5796639-5800785     | 2.147   |
| Taar1         | 0 | 0 | 0 | 0    | 0        | 0.025302 | 0        | Unclassified | chr10:23638211-23641210   | 1       |
| Olfr876       | 0 | 0 | 0 | 1    | 0.016667 | 0.020845 | 0        | Unclassified | chr9:37609473-37612521    | 1.049   |
| Hsd3b1        | 0 | 0 | 0 | 11   | 0.183333 | 0.017292 | 2.095087 | Unclassified | chr3:98656119-98665717    | 7.599   |
| Hsd3b2        | 0 | 0 | 0 | 6    | 0.1      | 0.035567 | 0        | Unclassified | chr3:98515029-98530466    | 13.438  |
| Serp2         | 0 | 0 | 0 | 73   | 1.216667 | 4.00616  | 6.547406 | Unclassified | chr14:76932620-76958494   | 23.875  |
| Dis3          | 0 | 0 | 0 | 669  | 11.15    | 8.98386  | 14.91875 | Unclassified | chr14:99475852-99500989   | 23.138  |
| Olfr874       | 0 | 0 | 0 | 1    | 0.016667 | 0        | 1        | Unclassified | chr9:37551720-37554653    | 0.934   |
| Prdm4         | 0 | 0 | 0 | 455  | 7.583333 | 5.6781   | 8.682576 | Unclassified | chr10:85354712-85381690   | 24.979  |
| V1rd16        | 0 | 0 | 0 | 3    | 0.05     | 0        | 2        | Unclassified | chr7:24735405-24738373    | 0.969   |
| Cenpv         | 0 | 0 | 0 | 136  | 2.266667 | 6.16519  | 13.05725 | Stalled      | chr11:62338446-62354763   | 14.318  |
| Pigu          | 0 | 0 | 0 | 566  | 9.433333 | 10.8072  | 33.26373 | Stalled      | chr2:155103987-155185160  | 79.174  |
| Zfp114        | 0 | 0 | 0 | 18   | 0.3      | 0.330331 | 7.939173 | Unclassified | chr7:24958063-24967337    | 7.275   |
| Pate2         | 0 | 0 | 0 | 3    | 0.05     | 0.011572 | 0.529633 | Unclassified | chr9:35475223-35480474    | 3.252   |
| Emx2          | 0 | 0 | 0 | 26   | 0.433333 | 0.152928 | 1.518292 | Unclassified | chr19:59531179-59539847   | 6.669   |
| Emx1          | 0 | 0 | 0 | 23   | 0.383333 | 0.054631 | 0.850386 | Unclassified | chr6:85135924-85154457    | 16.534  |
| En2           | 0 | 0 | 0 | 19   | 0.316667 | 0.311621 | 0.93956  | Unclassified | chr5:28490235-28498706    | 6.472   |
| Sic25a16      | 0 | 0 | 0 | 382  | 6.366667 | 3.88414  | 31.21439 | Stalled      | chr10:62381380-62409242   | 25.863  |
| Zfp428        | 0 | 0 | 0 | 405  | 6.75     | 8.49956  | 33.09367 | Stalled      | chr7:25290105-25300700    | 8.596   |
| Prrc1         | 0 | 0 | 0 | 534  | 8.9      | 9.4859   | 10.92251 | Unclassified | chr18:57512394-57552373   | 37.98   |
| Ccdc71        | 0 | 0 | 0 | 439  | 7.316667 | 11.8745  | 4.679688 | Unclassified | chr9:108360848-108368276  | 5.429   |
| Ecm2          | 0 | 0 | 0 | 69   | 1.15     | 0        | 0        | Unclassified | chr13:49598178-49628158   | 27.981  |
| Diablo        | 0 | 0 | 0 | 418  | 6.966667 | 7.97951  | 16.16154 | Unclassified | chr5:123961338-123976173  | 12.836  |
| Ube2n         | 0 | 0 | 0 | 937  | 15.61667 | 4.6256   | 24.12102 | Unclassified | chr10:94975795-95008292   | 30.498  |
| Trim13        | 0 | 0 | 0 | 96   | 1.6      | 0.646372 | 15.41539 | Stalled      | chr14:62216348-62224780   | 6.433   |
| Fuca2         | 0 | 0 | 0 | 208  | 3.466667 | 5.91106  | 17.92246 | Stalled      | chr10:13218833-13237081   | 16.249  |
| Olfr90        | 0 | 0 | 0 | 6    | 0.1      | 0.035657 | 1        | Unclassified | chr17:37222135-37225181   | 1.047   |
| Mrpl33        | 0 | 0 | 0 | 289  | 4.816667 | 34.1416  | 9.625676 | Unclassified | chr5:31914323-31925016    | 8.694   |
| Olfr1387      | 0 | 0 | 0 | 0    | 0        | 0        | 0        | Unclassified | chr11:49271182-49274118   | 0.937   |
| Olfr1384      | 0 | 0 | 0 | 1    | 0.016667 | 0.032293 | 0        | Unclassified | chr11:49325141-49328098   | 0.958   |
| Btn2a2        | 0 | 0 | 0 | 24   | 0.4      | 0.274973 | 0.724661 | Unclassified | chr13:23568931-23582726   | 11.796  |
| Olfr1392      | 0 | 0 | 0 | 2    | 0.033333 | 0.090572 | 2        | Unclassified | chr11:49104824-49107760   | 0.937   |
| Olfr1381      | 0 | 0 | 0 | 0    | 0        | 0.031788 | 0        | Unclassified | chr11:49363250-49366186   | 0.937   |
| Olfr1391      | 0 | 0 | 0 | 3    | 0.05     | 0.016509 | 2        | Unclassified | chr11:49138914-49141850   | 0.937   |
| Prps1         | 0 | 0 | 0 | 281  | 4.683333 | 15.3207  | 19.69538 | Stalled      | chrX:136989141-137010678  | 19.538  |
| Prpf4b        | 0 | 0 | 0 | 676  | 11.26667 | 13.6278  | 20.03274 | Unclassified | chr13:34965362-34994747   | 27.386  |
| Prph2         | 0 | 0 | 0 | 53   | 0.883333 | 0.034086 | 0        | Unclassified | chr17:47045433-47061875   | 14.443  |
| Prph          | 0 | 0 | 0 | 18   | 0.3      | 0.148513 | 1.901406 | Unclassified | chr15:98883604-98889409   | 3.806   |
| Prh1          | 0 | 0 | 0 | 0    | 0        | 0        | 0        | Unclassified | chr6:132517859-132522419  | 2.561   |
| Prox1         | 0 | 0 | 0 | 45   | 0.75     | 0.120793 | 1.61647  | Unclassified | chr1:191945657-191996559  | 48.903  |
| Rorb          | 0 | 0 | 0 | 120  | 2        | 0.3079   | 1.798467 | Unclassified | chr19:19011057-19187686   | 174.63  |
| Sema6d        | 0 | 0 | 0 | 548  | 9.133333 | 2.83778  | 7.903591 | Unclassified | chr2:124434031-124493505  | 57.475  |
| Arhgef19      | 0 | 0 | 0 | 42   | 0.7      | 0.286736 | 0.562038 | Unclassified | chr4:140796798-140813477  | 14.68   |
| Trpm6         | 0 | 0 | 0 | 105  | 1.75     | 0.013783 | 2.942045 | Unclassified | chr19:18822472-18967001   | 142.53  |
| D030056L22Rik | 0 | 0 | 0 | 383  | 6.383333 | 5.95319  | 22.31831 | Unclassified | chr19:18785725-18792918   | 5.194   |
| BC016495      | 0 | 0 | 0 | 339  | 5.65     | 2.91849  | 31.47144 | Stalled      | chr19:18704505-18726674   | 20.17   |
| Tnfaip813     | 0 | 0 | 0 | 34   | 0.566667 | 0.063362 | 1.215196 | Unclassified | chr9:53873412-53918218    | 42.807  |
| Olfr957       | 0 | 0 | 0 | 2    | 0.033333 | 0        | 2        | Unclassified | chr9:39318367-39321303    | 0.937   |
| Sic5a12       | 0 | 0 | 0 | 23   | 0.383333 | 0.010895 | 0        | Unclassified | chr2:110435454-110487926  | 50.473  |
| Adam4         | 0 | 0 | 0 | 8    | 0.133333 | 0.074849 | 0.614639 | Unclassified | chr12:82520535-82524865   | 2.331   |
| Bace1         | 0 | 0 | 0 | 126  | 2.1      | 1.49729  | 0.80859  | Unclassified | chr9:45644611-45670567    | 23.957  |

|                      |   |   |   |      |          |          |          |              |                           |         |
|----------------------|---|---|---|------|----------|----------|----------|--------------|---------------------------|---------|
| <b>Snhg11</b>        | 0 | 0 | 0 | 12   | 0.2      | 0.11455  | 0.487416 | Unclassified | chr2:158199373-158211881  | 10.509  |
| <b>Lin52</b>         | 0 | 0 | 0 | 771  | 12.85    | 1.47522  | 12.15749 | Unclassified | chr12:85790457-85872483   | 80.027  |
| <b>Ptchd3</b>        | 0 | 0 | 0 | 13   | 0.216667 | 0        | 0.549914 | Unclassified | chr11:121689531-121704748 | 13.218  |
| <b>Fam161b</b>       | 0 | 0 | 0 | 252  | 4.2      | 1.62214  | 29.78352 | Stalled      | chr12:85686266-85704771   | 16.506  |
| <b>4930432O21Rik</b> | 0 | 0 | 0 | 148  | 2.466667 | 3.16767  | 15.97177 | Stalled      | chr17:22097525-22131333   | 31.809  |
| <b>Adam22</b>        | 0 | 0 | 0 | 246  | 4.1      | 0.119843 | 0.548101 | Unclassified | chr5:8072351-8370081      | 295.731 |
| <b>Acot6</b>         | 0 | 0 | 0 | 60   | 1        | 3.0151   | 6.977962 | Unclassified | chr12:85439603-85450733   | 9.131   |
| <b>Olf1195</b>       | 0 | 0 | 0 | 1    | 0.016667 | 0.030495 | 1        | Unclassified | chr2:88522960-88525887    | 0.928   |
| <b>Olf1094</b>       | 0 | 0 | 0 | 1    | 0.016667 | 0.025813 | 1        | Unclassified | chr2:86666910-86669903    | 0.994   |
| <b>Calcoco2</b>      | 0 | 0 | 0 | 10   | 0.166667 | 0.056426 | 0        | Unclassified | chr11:95960639-95975276   | 12.638  |
| <b>Ube2i3</b>        | 0 | 0 | 0 | 1304 | 21.73333 | 20.2226  | 6.892271 | Unclassified | chr16:17152107-17203585   | 49.479  |
| <b>Ube2e1</b>        | 0 | 0 | 0 | 620  | 10.33333 | 19.0652  | 12.0502  | Unclassified | chr14:19115242-19166358   | 49.117  |
| <b>Ube2e3</b>        | 0 | 0 | 0 | 523  | 8.716667 | 9.4316   | 24.0295  | Unclassified | chr2:78707203-78760740    | 51.538  |
| <b>Apol10a</b>       | 0 | 0 | 0 | 12   | 0.2      | 0.060067 | 0        | Unclassified | chr15:77305476-77321499   | 14.024  |
| <b>Lax1</b>          | 0 | 0 | 0 | 498  | 8.3      | 40.6318  | 3.584503 | Unclassified | chr1:135575607-135588593  | 10.987  |
| <b>Dnajc19</b>       | 0 | 0 | 0 | 555  | 9.25     | 8.30342  | 13.05919 | Unclassified | chr3:33956679-33982248    | 23.57   |
| <b>Olf1093</b>       | 0 | 0 | 0 | 2    | 0.033333 | 0        | 0        | Unclassified | chr2:86623888-86626857    | 0.97    |
| <b>Mettl14</b>       | 0 | 0 | 0 | 262  | 4.366667 | 5.62359  | 15.87899 | Unclassified | chr3:123071212-123090908  | 17.697  |
| <b>Smtnl2</b>        | 0 | 0 | 0 | 45   | 0.75     | 0.830326 | 3.395707 | Unclassified | chr11:72203615-72227215   | 21.601  |
| <b>Arrdc1</b>        | 0 | 0 | 0 | 509  | 8.483333 | 20.0666  | 24.89026 | Unclassified | chr2:24780872-24792801    | 9.93    |
| <b>Stard13</b>       | 0 | 0 | 0 | 170  | 2.833333 | 0.18834  | 0.948946 | Unclassified | chr5:151840090-151994768  | 152.679 |
| <b>Ccdc92</b>        | 0 | 0 | 0 | 186  | 3.1      | 1.83449  | 17.68136 | Stalled      | chr5:125314801-125344591  | 27.791  |
| <b>Tktl2</b>         | 0 | 0 | 0 | 3    | 0.05     | 0.05657  | 0.342105 | Unclassified | chr8:69033638-69037677    | 2.04    |
| <b>Kif3b</b>         | 0 | 0 | 0 | 567  | 9.45     | 6.485    | 7.02433  | Unclassified | chr2:153115151-153159123  | 41.973  |
| <b>Kif3a</b>         | 0 | 0 | 0 | 102  | 1.7      | 1.27955  | 14.65949 | Stalled      | chr11:53378880-53417746   | 36.867  |
| <b>Lrrc8e</b>        | 0 | 0 | 0 | 24   | 0.4      | 0.072726 | 0.944133 | Unclassified | chr8:4224826-4237469      | 10.644  |
| <b>Ppapdc2</b>       | 0 | 0 | 0 | 163  | 2.716667 | 5.29664  | 14.71532 | Stalled      | chr19:29036409-29041290   | 2.882   |
| <b>Kif21a</b>        | 0 | 0 | 0 | 81   | 1.35     | 0.026153 | 0.594193 | Unclassified | chr15:90763706-90882379   | 116.674 |
| <b>Tc2n</b>          | 0 | 0 | 0 | 27   | 0.45     | 0.076412 | 1.46753  | Unclassified | chr12:102886811-102958712 | 69.902  |
| <b>Kif2a</b>         | 0 | 0 | 0 | 755  | 12.58333 | 5.61974  | 15.48706 | Unclassified | chr13:107750666-107814194 | 61.529  |
| <b>Prkacb</b>        | 0 | 0 | 0 | 513  | 8.55     | 7.39323  | 28.12496 | Stalled      | chr3:146392543-146477910  | 83.368  |
| <b>Rabif</b>         | 0 | 0 | 0 | 654  | 10.9     | 7.38686  | 25.99656 | Unclassified | chr1:136389236-136404461  | 13.226  |
| <b>Rdh10</b>         | 0 | 0 | 0 | 271  | 4.516667 | 3.08184  | 12.35422 | Stalled      | chr1:16093962-16122631    | 26.67   |
| <b>Chuk</b>          | 0 | 0 | 0 | 626  | 10.43333 | 5.80625  | 32.08474 | Unclassified | chr19:44147823-44183967   | 34.145  |
| <b>Vsx2</b>          | 0 | 0 | 0 | 45   | 0.75     | 0.076576 | 0.380872 | Unclassified | chr12:85908801-85936407   | 25.607  |
| <b>38779</b>         | 0 | 0 | 0 | 107  | 1.783333 | 0.042854 | 1.030667 | Unclassified | chr1:72473685-72585138    | 109.454 |
| <b>Chrm3</b>         | 0 | 0 | 0 | 335  | 5.583333 | 0.141595 | 2.379693 | Unclassified | chr13:9875858-10362049    | 484.192 |
| <b>Chrm4</b>         | 0 | 0 | 0 | 128  | 2.133333 | 0.372521 | 2.350585 | Elongating   | chr2:91760345-91769986    | 7.642   |
| <b>Gpr17</b>         | 0 | 0 | 0 | 17   | 0.283333 | 0.074255 | 0.573176 | Unclassified | chr18:32102667-32111290   | 6.624   |
| <b>Fam196b</b>       | 0 | 0 | 0 | 2101 | 35.01667 | 0        | 0.735061 | Unclassified | chr11:34212821-34322640   | 107.82  |
| <b>Hnrnp2</b>        | 0 | 0 | 0 | 178  | 2.966667 | 19.5805  | 16.73457 | Stalled      | chrX:131133824-131141593  | 5.77    |
| <b>Zfp235</b>        | 0 | 0 | 0 | 178  | 2.966667 | 3.24635  | 13.05523 | Stalled      | chr7:24917181-24928260    | 9.08    |
| <b>Mpp6</b>          | 0 | 0 | 0 | 593  | 9.883333 | 8.58129  | 17.88667 | Unclassified | chr6:50058239-50148597    | 88.359  |
| <b>38965</b>         | 0 | 0 | 0 | 872  | 14.53333 | 26.9036  | 10.04254 | Unclassified | chrX:34452239-34531452    | 77.214  |
| <b>Nme4</b>          | 0 | 0 | 0 | 78   | 1.3      | 7.19401  | 12.21333 | Stalled      | chr17:26228689-26234415   | 3.727   |
| <b>Pap0lb</b>        | 0 | 0 | 0 | 6    | 0.1      | 0.580213 | 1.716852 | Unclassified | chr5:143003693-143008030  | 2.338   |
| <b>Helq</b>          | 0 | 0 | 0 | 682  | 11.36667 | 4.79521  | 17.55988 | Unclassified | chr5:101191166-101229619  | 36.454  |
| <b>Stx17</b>         | 0 | 0 | 0 | 319  | 5.316667 | 1.55526  | 20.15424 | Stalled      | chr4:48135790-48199378    | 61.589  |
| <b>Hey2</b>          | 0 | 0 | 0 | 11   | 0.183333 | 0.804817 | 4.914494 | Unclassified | chr10:30552164-30564589   | 10.426  |
| <b>Olf1875</b>       | 0 | 0 | 0 | 1    | 0.016667 | 0.072819 | 1        | Unclassified | chr9:37578221-37581225    | 1.005   |
| <b>Cdc25c</b>        | 0 | 0 | 0 | 272  | 4.533333 | 7.35715  | 14.02652 | Unclassified | chr18:34892650-34913187   | 18.538  |
| <b>Pop1</b>          | 0 | 0 | 0 | 670  | 11.16667 | 5.28127  | 12.30505 | Unclassified | chr15:34423065-34460408   | 35.344  |
| <b>Gm5758</b>        | 0 | 0 | 0 | 3    | 0.05     | 0        | 2        | Unclassified | chrX:83573281-83576274    | 0.994   |
| <b>Rimbp2</b>        | 0 | 0 | 0 | 217  | 3.616667 | 0.04208  | 0.943393 | Unclassified | chr5:129266275-129461237  | 192.963 |
| <b>Camsap1</b>       | 0 | 0 | 0 | 577  | 9.616667 | 2.74618  | 10.00392 | Unclassified | chr2:25782357-25840802    | 56.446  |
| <b>Vmn2r25</b>       | 0 | 0 | 0 | 7    | 0.116667 | 0.022453 | 0        | Unclassified | chr6:123772831-123805208  | 30.378  |
| <b>Lcn11</b>         | 0 | 0 | 0 | 7    | 0.116667 | 0        | 2.123387 | Unclassified | chr2:25630536-25635798    | 3.263   |
| <b>Eif5a2</b>        | 0 | 0 | 0 | 71   | 1.183333 | 0.942575 | 9.884454 | Unclassified | chr3:28678232-28697768    | 17.537  |
| <b>Qsox2</b>         | 0 | 0 | 0 | 422  | 7.033333 | 2.61098  | 11.39065 | Unclassified | chr2:26064649-26094940    | 28.292  |
| <b>Pacrg</b>         | 0 | 0 | 0 | 388  | 6.466667 | 0.539137 | 21.21772 | Stalled      | chr17:10595877-11035057   | 437.181 |
| <b>Ralb</b>          | 0 | 0 | 0 | 270  | 4.5      | 11.3843  | 11.23533 | Unclassified | chr1:121366882-121403359  | 34.478  |
| <b>Lrrc67</b>        | 0 | 0 | 0 | 44   | 0.733333 | 0.059816 | 0.981442 | Unclassified | chr1:9958706-10001211     | 40.506  |
| <b>Olf1735</b>       | 0 | 0 | 0 | 0    | 0        | 0        | 0        | Unclassified | chr14:50965050-50968115   | 1.066   |
| <b>170001L19Rik</b>  | 0 | 0 | 0 | 25   | 0.416667 | 0.028355 | 1.323741 | Unclassified | chr13:68734315-68753108   | 16.794  |
| <b>Olf1298</b>       | 0 | 0 | 0 | 0    | 0        | 0        | 0        | Unclassified | chr7:93637060-93640059    | 1       |
| <b>Olf1294</b>       | 0 | 0 | 0 | 0    | 0        | 0.038182 | 0        | Unclassified | chr7:93764146-93767153    | 1.008   |
| <b>Olf1293</b>       | 0 | 0 | 0 | 2    | 0.033333 | 0        | 1        | Unclassified | chr7:93810173-93813184    | 1.012   |
| <b>Olf1024</b>       | 0 | 0 | 0 | 0    | 0        | 0        | 0        | Unclassified | chr2:85744227-85747209    | 0.983   |
| <b>Olf1704</b>       | 0 | 0 | 0 | 1    | 0.016667 | 0.08786  | 0        | Unclassified | chr7:114006495-114009443  | 0.949   |
| <b>Ppbb</b>          | 0 | 0 | 0 | 0    | 0        | 0.201738 | 0        | Unclassified | chr5:91195543-91199086    | 1.544   |
| <b>Parva</b>         | 0 | 0 | 0 | 165  | 2.75     | 0.054721 | 0.498446 | Unclassified | chr7:119569219-119735202  | 163.984 |
| <b>Jph3</b>          | 0 | 0 | 0 | 133  | 2.216667 | 0.10924  | 0.314777 | Unclassified | chr8:124252462-124314721  | 60.26   |
| <b>As3mt</b>         | 0 | 0 | 0 | 175  | 2.916667 | 4.32538  | 11.59281 | Stalled      | chr19:46779932-46815585   | 33.654  |
| <b>Pm20d1</b>        | 0 | 0 | 0 | 35   | 0.583333 | 0.224467 | 0        | Unclassified | chr1:133691971-133714692  | 20.722  |
| <b>Gpr119</b>        | 0 | 0 | 0 | 4    | 0.066667 | 0        | 0        | Unclassified | chrX:46021155-46029655    | 6.501   |
| <b>Foxn1</b>         | 0 | 0 | 0 | 85   | 1.416667 | 0.081926 | 0        | Unclassified | chr11:78171789-78202060   | 28.272  |
| <b>Olf1320</b>       | 0 | 0 | 0 | 1    | 0.016667 | 0        | 1        | Unclassified | chrX:47034680-47037640    | 0.961   |
| <b>Olf1321</b>       | 0 | 0 | 0 | 3    | 0.05     | 0        | 1        | Unclassified | chrX:47080149-47083109    | 0.961   |
| <b>Ubtfl1</b>        | 0 | 0 | 0 | 6    | 0.1      | 0.019415 | 0        | Unclassified | chr9:18206861-18215946    | 7.086   |
| <b>Crygd</b>         | 0 | 0 | 0 | 2    | 0.033333 | 0        | 1        | Unclassified | chr1:65108411-65112014    | 1.604   |
| <b>Pppde1</b>        | 0 | 0 | 0 | 361  | 6.016667 | 4.20507  | 19.96976 | Stalled      | chr1:180115547-180182728  | 65.182  |
| <b>Zfhx3</b>         | 0 | 0 | 0 | 384  | 6.4      | 0.149667 | 3.582472 | Unclassified | chr8:111236543-111485536  | 246.994 |
| <b>Oxct2b</b>        | 0 | 0 | 0 | 8    | 0.133333 | 0.455814 | 0.602557 | Unclassified | chr4:122791490-122795243  | 1.754   |
| <b>Snord61</b>       | 0 | 0 | 0 | 42   | 0.7      | 0.82686  | 8        | Unclassified | chrX:54644624-54646686    | 0.063   |
| <b>Kcnn1</b>         | 0 | 0 | 0 | 60   | 1        | 0.091953 | 1.481588 | Unclassified | chr8:73365947-73382907    | 14.961  |
| <b>Olf1661</b>       | 0 | 0 | 0 | 3    | 0.05     | 0.026701 | 2        | Unclassified | chr7:111834530-111837490  | 0.961   |

|               |   |   |   |      |          |          |          |              |                           |         |
|---------------|---|---|---|------|----------|----------|----------|--------------|---------------------------|---------|
| Trim72        | 0 | 0 | 0 | 25   | 0.416667 | 0.082987 | 2.290065 | Unclassified | chr7:135145891-135154906  | 7.016   |
| Uggt1         | 0 | 0 | 0 | 2155 | 35.91667 | 12.0786  | 12.61043 | Unclassified | chr1:36196873-36303147    | 104.275 |
| Smapp1        | 0 | 0 | 0 | 307  | 5.116667 | 10.6119  | 28.75444 | Stalled      | chr1:23852465-23931128    | 76.664  |
| Ext1          | 0 | 0 | 0 | 960  | 16       | 7.62478  | 42.04746 | Stalled      | chr15:52899817-53179738   | 277.922 |
| Ext2          | 0 | 0 | 0 | 785  | 13.08333 | 8.98976  | 9.263088 | Unclassified | chr2:93535787-93664725    | 126.939 |
| Eya1          | 0 | 0 | 0 | 453  | 7.55     | 1.62337  | 9.92208  | Unclassified | chr1:14159038-14302280    | 141.243 |
| Eya2          | 0 | 0 | 0 | 182  | 3.033333 | 0.238544 | 2.790347 | Unclassified | chr2:165478797-165597131  | 116.335 |
| Iqcf1         | 0 | 0 | 0 | 4    | 0.066667 | 0.07282  | 0.781973 | Unclassified | chr9:106400297-106404580  | 2.284   |
| Fibcd1        | 0 | 0 | 0 | 79   | 1.316667 | 0.124015 | 2.161463 | Unclassified | chr2:31668809-31703525    | 32.717  |
| Gnat3         | 0 | 0 | 0 | 60   | 1        | 0.174669 | 0        | Unclassified | chr5:17466387-17525486    | 57.1    |
| Ppargc1b      | 0 | 0 | 0 | 1200 | 20       | 1.50854  | 10.80819 | Unclassified | chr18:61457789-61562085   | 102.297 |
| Vgll1         | 0 | 0 | 0 | 12   | 0.2      | 0.032392 | 0.597689 | Unclassified | chrX:54339282-54358623    | 17.342  |
| Lrp11         | 0 | 0 | 0 | 92   | 1.533333 | 1.49482  | 7.922078 | Unclassified | chr10:7307597-7345273     | 35.677  |
| C1rl          | 0 | 0 | 0 | 24   | 0.4      | 0.087262 | 3.248788 | Unclassified | chr6:124441130-124460661  | 17.532  |
| Clstn3        | 0 | 0 | 0 | 46   | 0.766667 | 0.195108 | 1.338511 | Unclassified | chr6:124380773-124416802  | 34.03   |
| Gm1568        | 0 | 0 | 0 | 14   | 0.233333 | 0.465992 | 0.965335 | Unclassified | chr12:81856433-81863702   | 5.27    |
| Prickle1      | 0 | 0 | 0 | 186  | 3.1      | 0.128634 | 3.219114 | Unclassified | chr15:93329544-93428322   | 96.779  |
| Prdm5         | 0 | 0 | 0 | 165  | 2.75     | 0.30543  | 7.146594 | Unclassified | chr6:65726955-65886371    | 157.417 |
| Mttr1         | 0 | 0 | 0 | 302  | 5.033333 | 3.89082  | 15.49564 | Stalled      | chrX:68615934-68672371    | 54.438  |
| Stx7          | 0 | 0 | 0 | 811  | 13.51667 | 16.4476  | 8.380901 | Unclassified | chr10:23867122-23908765   | 39.644  |
| Vamp4         | 0 | 0 | 0 | 444  | 7.4      | 3.05825  | 25.4392  | Unclassified | chr1:164498958-164529209  | 28.252  |
| Nt5c3l        | 0 | 0 | 0 | 464  | 7.733333 | 22.0591  | 12.11724 | Unclassified | chr11:100283634-100304403 | 18.77   |
| Defa25        | 0 | 0 | 0 | 0    | 0        | 0        | 0        | Unclassified | chr8:22222120-22224963    | 0.844   |
| Ankrd34c      | 0 | 0 | 0 | 6    | 0.1      | 0.041427 | 1.509323 | Unclassified | chr9:89623086-89635313    | 10.228  |
| Ppp1r3f       | 0 | 0 | 0 | 346  | 5.766667 | 8.37054  | 9.650307 | Unclassified | chrX:7135687-7153246      | 15.56   |
| Otud5         | 0 | 0 | 0 | 654  | 10.9     | 35.6904  | 14.45205 | Unclassified | chrX:7416956-7451984      | 33.029  |
| Gripap1       | 0 | 0 | 0 | 288  | 4.8      | 15.2525  | 11.22399 | Unclassified | chrX:7365120-7397689      | 30.57   |
| Dusp8         | 0 | 0 | 0 | 47   | 0.783333 | 0.268721 | 1.065789 | Unclassified | chr7:149267400-149278175  | 8.776   |
| Fkbp1b        | 0 | 0 | 0 | 101  | 1.683333 | 1.007    | 3.742348 | Unclassified | chr12:4839979-4850401     | 8.423   |
| AI132487      | 0 | 0 | 0 | 59   | 0.983333 | 1.05495  | 1.207792 | Unclassified | chr12:110087338-110095024 | 5.687   |
| Cstf2         | 0 | 0 | 0 | 429  | 7.15     | 10.7804  | 16.19848 | Unclassified | chrX:130591887-130621360  | 27.474  |
| Ntsr2         | 0 | 0 | 0 | 9    | 0.15     | 0.057992 | 0.980286 | Unclassified | chr12:16658275-16667042   | 6.768   |
| Ntrk2         | 0 | 0 | 0 | 340  | 5.666667 | 0.129775 | 0.980792 | Unclassified | chr13:58905956-59231328   | 32.323  |
| Vasn          | 0 | 0 | 0 | 440  | 7.333333 | 4.83844  | 0.987026 | Unclassified | chr16:4637944-4651166     | 11.223  |
| Prrg3         | 0 | 0 | 0 | 6    | 0.1      | 0.010865 | 0.685262 | Unclassified | chrX:69206359-69218067    | 9.709   |
| Mobkl1b       | 0 | 0 | 0 | 611  | 10.18333 | 22.7005  | 19.71555 | Unclassified | chr6:83274032-83290943    | 14.912  |
| Gas2l3        | 0 | 0 | 0 | 397  | 6.616667 | 1.22444  | 19.59386 | Unclassified | chr10:88871567-88908712   | 35.146  |
| 4930452B06Rik | 0 | 0 | 0 | 213  | 3.55     | 0.074541 | 2.6537   | Unclassified | chr14:9263685-9500804     | 235.12  |
| Gm5424        | 0 | 0 | 0 | 4    | 0.066667 | 14.3934  | 4        | Unclassified | chr10:61531769-61535319   | 1.551   |
| Usp26         | 0 | 0 | 0 | 13   | 0.216667 | 0.012404 | 0        | Unclassified | chrX:49107135-49156410    | 47.276  |
| Defa26        | 0 | 0 | 0 | 0    | 0        | 0.064795 | 0        | Unclassified | chr8:22726654-22729354    | 0.701   |
| Tdrd1         | 0 | 0 | 0 | 54   | 0.9      | 0.033012 | 1.368957 | Unclassified | chr19:56898698-56944502   | 43.805  |
| Elmod1        | 0 | 0 | 0 | 29   | 0.483333 | 0.068879 | 2.861605 | Unclassified | chr9:53759266-53825108    | 63.843  |
| Pramel3       | 0 | 0 | 0 | 1    | 0.016667 | 0        | 0        | Unclassified | chrX:131834854-131847173  | 10.32   |
| Nlrp4c        | 0 | 0 | 0 | 25   | 0.416667 | 0.010639 | 0        | Unclassified | chr7:5994762-6056751      | 59.99   |
| Fastkd5       | 0 | 0 | 0 | 435  | 7.25     | 0        | 10.89362 | Unclassified | chr2:130439573-130457763  | 16.191  |
| Fitm1         | 0 | 0 | 0 | 14   | 0.233333 | 0.112424 | 1.09375  | Unclassified | chr14:56192510-56195789   | 1.28    |
| Gm5622        | 0 | 0 | 0 | 18   | 0.3      | 0        | 0        | Unclassified | chr14:52170464-52282628   | 110.165 |
| Slx           | 0 | 0 | 0 | 1    | 0.016667 | 0        | 0        | Unclassified | chrX:25949784-25974691    | 22.908  |
| 5830418K08Rik | 0 | 0 | 0 | 1207 | 20.11667 | 3.84908  | 21.8415  | Unclassified | chr9:15121357-15164232    | 40.876  |
| Foxi3         | 0 | 0 | 0 | 11   | 0.183333 | 0.191447 | 0.992544 | Unclassified | chr6:70904599-70911059    | 4.461   |
| Emi5          | 0 | 0 | 0 | 358  | 5.966667 | 1.29794  | 14.93056 | Stalled      | chr12:100024813-100141694 | 114.882 |
| Fam154b       | 0 | 0 | 0 | 413  | 6.883333 | 1.13545  | 27.97274 | Unclassified | chr7:89781469-89799038    | 15.57   |
| Zyx           | 0 | 0 | 0 | 193  | 3.216667 | 6.92217  | 8.830748 | Unclassified | chr6:42297826-42308394    | 8.569   |
| Pwp1          | 0 | 0 | 0 | 392  | 6.533333 | 12.5136  | 7.578132 | Unclassified | chr10:85332575-85351847   | 17.273  |
| Fer114        | 0 | 0 | 0 | 92   | 1.533333 | 0.041986 | 1.104596 | Unclassified | chr2:155844875-155880683  | 33.809  |
| BC068281      | 0 | 0 | 0 | 122  | 2.033333 | 1.75481  | 7.956708 | Unclassified | chr12:4848108-4859719     | 9.612   |
| V1rh21        | 0 | 0 | 0 | 0    | 0        | 0        | 0        | Unclassified | chr13:22417779-22420676   | 0.898   |
| V1ri10        | 0 | 0 | 0 | 0    | 0        | 0        | 0        | Unclassified | chr13:23189017-23191914   | 0.898   |
| V1rh20        | 0 | 0 | 0 | 2    | 0.033333 | 0.042864 | 0        | Unclassified | chr13:22943467-22946364   | 0.898   |
| V1rh16        | 0 | 0 | 0 | 0    | 0        | 0        | 0        | Unclassified | chr13:23323983-23326910   | 0.928   |
| V1rh18        | 0 | 0 | 0 | 2    | 0.033333 | 0        | 1        | Unclassified | chr13:22974956-22978030   | 1.075   |
| V1rh13        | 0 | 0 | 0 | 0    | 0        | 0        | 0        | Unclassified | chr13:23252511-23255450   | 0.94    |
| V1rh14        | 0 | 0 | 0 | 0    | 0        | 0        | 0        | Unclassified | chr13:23205702-23208599   | 0.898   |
| V1rh11        | 0 | 0 | 0 | 2    | 0.033333 | 0        | 1        | Unclassified | chr13:22613919-22616855   | 0.937   |
| V1rh12        | 0 | 0 | 0 | 1    | 0.016667 | 0        | 1        | Unclassified | chr13:23275496-23278393   | 0.898   |
| Tusc2         | 0 | 0 | 0 | 281  | 4.683333 | 9.86685  | 11.72745 | Unclassified | chr9:107463585-107468439  | 2.855   |
| Gdpd4         | 0 | 0 | 0 | 71   | 1.183333 | 0.033617 | 0        | Unclassified | chr7:105066467-105198173  | 129.707 |
| A330021E22Rik | 0 | 0 | 0 | 30   | 0.5      | 0.292268 | 0.746036 | Unclassified | chr5:5580981-5666232      | 83.252  |
| Gm606         | 0 | 0 | 0 | 23   | 0.383333 | 0.021967 | 1.226919 | Unclassified | chr16:26957320-26992060   | 32.741  |
| Igsf11        | 0 | 0 | 0 | 93   | 1.55     | 0.277963 | 1.753623 | Unclassified | chr16:38900457-39027270   | 124.814 |
| Hcn4          | 0 | 0 | 0 | 69   | 1.15     | 0.074239 | 1.077776 | Unclassified | chr9:58669318-58708762    | 37.445  |
| Hs3st5        | 0 | 0 | 0 | 182  | 3.033333 | 0.043727 | 1.294475 | Unclassified | chr10:36224612-36554200   | 327.589 |
| Exd2          | 0 | 0 | 0 | 351  | 5.853333 | 3.2854   | 35.59856 | Stalled      | chr12:81562081-81599122   | 35.042  |
| Elavl4        | 0 | 0 | 0 | 60   | 1        | 0.038372 | 0.596472 | Unclassified | chr4:109876341-109962116  | 83.776  |
| Elavl3        | 0 | 0 | 0 | 118  | 1.966667 | 0.09945  | 1.241872 | Unclassified | chr9:21819449-21858467    | 37.019  |
| Fgf2          | 0 | 0 | 0 | 79   | 1.316667 | 0.903597 | 2.221752 | Unclassified | chr3:37245574-37303752    | 56.179  |
| Rsf1          | 0 | 0 | 0 | 1277 | 21.28333 | 3.25914  | 16.83424 | Unclassified | chr7:104726405-104841291  | 112.887 |
| Cdcp1         | 0 | 0 | 0 | 43   | 0.716667 | 0.039957 | 1.033291 | Unclassified | chr9:123081402-123127156  | 43.755  |
| Pkn2          | 0 | 0 | 0 | 782  | 13.03333 | 3.86907  | 49.48625 | Stalled      | chr3:142453865-142546968  | 91.104  |
| Olfr1341      | 0 | 0 | 0 | 2    | 0.033333 | 0        | 1        | Unclassified | chr4:118380013-118382952  | 0.94    |
| Pms1          | 0 | 0 | 0 | 538  | 8.966667 | 2.85159  | 87.38197 | Stalled      | chr1:53246031-53355840    | 107.81  |
| Csd8ap2       | 0 | 0 | 0 | 759  | 12.65    | 5.19588  | 17.88231 | Unclassified | chr4:32700447-32740240    | 37.794  |
| Cd8b1         | 0 | 0 | 0 | 31   | 0.516667 | 0.280583 | 1.059056 | Unclassified | chr6:71270805-71287445    | 14.641  |
| Cenph         | 0 | 0 | 0 | 331  | 5.516667 | 13.0203  | 15.08857 | Unclassified | chr13:101529640-101547854 | 16.215  |
| Ypel2         | 0 | 0 | 0 | 192  | 3.2      | 1.17499  | 8.34297  | Unclassified | chr11:86749926-86809264   | 57.339  |

|               |   |   |   |      |          |          |          |              |                           |         |
|---------------|---|---|---|------|----------|----------|----------|--------------|---------------------------|---------|
| Rhox11        | 0 | 0 | 0 | 4    | 0.066667 | 0        | 1.76589  | Unclassified | chrX:35429774-35440316    | 8.543   |
| Ifitm5        | 0 | 0 | 0 | 28   | 0.466667 | 0.126536 | 1.346643 | Unclassified | chr7:148134860-148138138  | 1.279   |
| Uprrt         | 0 | 0 | 0 | 113  | 1.883333 | 8.41295  | 34.53037 | Stalled      | chrX:101676120-101701601  | 23.482  |
| 4930430D24Rik | 0 | 0 | 0 | 2    | 0.033333 | 0.095437 | 0        | Unclassified | chrX:35391375-35398291    | 4.917   |
| Cln8          | 0 | 0 | 0 | 47   | 0.783333 | 0.647636 | 8.078047 | Unclassified | chr8:14886535-14901719    | 13.185  |
| Clec4a2       | 0 | 0 | 0 | 13   | 0.216667 | 0.06124  | 0.66313  | Unclassified | chr6:123071333-123094017  | 20.685  |
| Mctp1         | 0 | 0 | 0 | 438  | 7.3      | 0.218138 | 4.830322 | Unclassified | chr13:76520408-77171071   | 648.664 |
| Elov14        | 0 | 0 | 0 | 39   | 0.65     | 0.484363 | 6.575854 | Unclassified | chr9:83672299-83701912    | 27.614  |
| Scaf1         | 0 | 0 | 0 | 591  | 9.85     | 29.5199  | 3.233582 | Unclassified | chr7:52258319-52273619    | 13.301  |
| Cyp2c65       | 0 | 0 | 0 | 19   | 0.316667 | 0        | 0        | Unclassified | chr19:39133495-39168438   | 32.944  |
| Tsc22d4       | 0 | 0 | 0 | 435  | 7.25     | 40.6034  | 9.91735  | Unclassified | chr5:138185223-138200975  | 13.753  |
| 2510002D24Rik | 0 | 0 | 0 | 269  | 4.483333 | 11.8686  | 14.14364 | Unclassified | chr16:18834672-18840206   | 3.535   |
| Zfp777        | 0 | 0 | 0 | 469  | 7.816667 | 7.23691  | 8.977231 | Unclassified | chr6:47974186-48000113    | 23.928  |
| Tmem158       | 0 | 0 | 0 | 15   | 0.25     | 2.76528  | 1.572576 | Unclassified | chr9:123168174-123171907  | 1.734   |
| Boc           | 0 | 0 | 0 | 85   | 1.416667 | 0.271992 | 0.464378 | Unclassified | chr16:44485157-44560983   | 73.827  |
| P2ry10        | 0 | 0 | 0 | 282  | 4.7      | 6.76892  | 4.528308 | Unclassified | chrX:104282673-104300309  | 15.637  |
| Asprv1        | 0 | 0 | 0 | 7    | 0.116667 | 0.075341 | 0.840442 | Unclassified | chr6:86576167-86579698    | 1.532   |
| 4930417M19Rik | 0 | 0 | 0 | 89   | 1.483333 | 0.07448  | 2.252289 | Unclassified | chr4:43278030-43386703    | 106.674 |
| Ppp6c         | 0 | 0 | 0 | 365  | 6.083333 | 10.4111  | 18.81819 | Unclassified | chr2:39052317-39083858    | 29.542  |
| Tram111       | 0 | 0 | 0 | 5    | 0.083333 | 0.057627 | 2        | Unclassified | chr3:124021954-124026178  | 2.225   |
| Cd59b         | 0 | 0 | 0 | 14   | 0.233333 | 0.136724 | 1.179917 | Unclassified | chr2:103909166-103925114  | 13.949  |
| Zfp641        | 0 | 0 | 0 | 13   | 0.216667 | 0.163902 | 0.897961 | Unclassified | chr15:98116552-98128514   | 9.963   |
| 2310002J15Rik | 0 | 0 | 0 | 22   | 0.366667 | 0.065641 | 0.038462 | Unclassified | chr2:25094338-25097417    | 1.08    |
| Cd81          | 0 | 0 | 0 | 700  | 11.66667 | 61.9799  | 9.678164 | Unclassified | chr7:150236654-150253835  | 15.182  |
| Krtap1-3      | 0 | 0 | 0 | 0    | 0        | 0        | 0        | Unclassified | chr11:99451776-99454653   | 0.878   |
| Igfbp1b       | 0 | 0 | 0 | 3    | 0.05     | 0        | 0.260902 | Unclassified | chr6:138605613-138608965  | 1.353   |
| C030017K20Rik | 0 | 0 | 0 | 22   | 0.366667 | 0.081171 | 0        | Unclassified | chr4:154823678-154840514  | 14.837  |
| Phactr3       | 0 | 0 | 0 | 232  | 3.866667 | 0.029679 | 0        | Unclassified | chr2:177874721-178071196  | 194.476 |
| Snora68       | 0 | 0 | 0 | 279  | 4.65     | 0        | 107      | Unclassified | chr8:73419657-73421755    | 0.099   |
| Lpxn          | 0 | 0 | 0 | 1365 | 22.75    | 44.3011  | 5.524727 | Unclassified | chr19:12871098-12908298   | 35.201  |
| Ppih          | 0 | 0 | 0 | 618  | 10.3     | 7.23341  | 8.269164 | Unclassified | chr4:118972614-118995128  | 20.515  |
| Hoxa13        | 0 | 0 | 0 | 11   | 0.183333 | 0.470052 | 0.339973 | Unclassified | chr6:52208851-52212874    | 2.024   |
| Tceal6        | 0 | 0 | 0 | 3    | 0.05     | 0.012837 | 1        | Unclassified | chrX:131743225-131747226  | 2.002   |
| Smpx          | 0 | 0 | 0 | 13   | 0.216667 | 0.027211 | 0        | Unclassified | chrX:154135049-154190521  | 53.473  |
| Tspan13       | 0 | 0 | 0 | 316  | 5.266667 | 19.3539  | 18.92382 | Unclassified | chr12:36741141-36771065   | 27.925  |
| G2e3          | 0 | 0 | 0 | 403  | 6.176667 | 2.47843  | 37.26357 | Stalled      | chr12:52447216-52477973   | 28.758  |
| Pigy          | 0 | 0 | 0 | 326  | 5.433333 | 2.03653  | 22.08276 | Unclassified | chr6:57634732-57644072    | 7.341   |
| Olfr126       | 0 | 0 | 0 | 1    | 0.016667 | 0.024334 | 1        | Unclassified | chr17:37985538-37988498   | 0.961   |
| Olfr1225      | 0 | 0 | 0 | 0    | 0        | 0        | 0        | Unclassified | chr2:89010431-89013367    | 0.937   |
| Olfr1297      | 0 | 0 | 0 | 0    | 0        | 0.013617 | 0        | Unclassified | chr2:111461290-111464229  | 0.94    |
| Olfr1302      | 0 | 0 | 0 | 2    | 0.033333 | 0        | 1        | Unclassified | chr2:111618469-111621417  | 0.949   |
| Pard6b        | 0 | 0 | 0 | 138  | 2.3      | 1.74519  | 18.36066 | Stalled      | chr2:167904503-167926702  | 20.2    |
| Xkr4          | 0 | 0 | 0 | 200  | 3.333333 | 0.042321 | 0.697256 | Unclassified | chr1:3204562-3663579      | 457.018 |
| Hoxc6         | 0 | 0 | 0 | 3    | 0.05     | 0.18516  | 0        | Unclassified | chr15:102837992-102842312 | 2.321   |
| Gp2           | 0 | 0 | 0 | 13   | 0.216667 | 0        | 0.567256 | Unclassified | chr7:126586057-126604786  | 16.73   |
| Cd320         | 0 | 0 | 0 | 166  | 2.766667 | 4.6697   | 16.06919 | Stalled      | chr17:33978035-33986719   | 6.685   |
| Aqp3          | 0 | 0 | 0 | 21   | 0.35     | 0.468812 | 2.776364 | Unclassified | chr4:41039756-41047216    | 5.461   |
| Olfr112       | 0 | 0 | 0 | 3    | 0.05     | 0.024235 | 0        | Unclassified | chr17:37700183-37708394   | 6.212   |
| Olfr1500      | 0 | 0 | 0 | 4    | 0.066667 | 0        | 2        | Unclassified | chr19:13901948-13904884   | 0.937   |
| Olfr761       | 0 | 0 | 0 | 0    | 0        | 0.008136 | 0        | Unclassified | chr17:38088995-38091967   | 0.973   |
| Olfr119       | 0 | 0 | 0 | 2    | 0.033333 | 0.034991 | 0.798143 | Unclassified | chr17:37831629-37838582   | 4.954   |
| Cdh11         | 0 | 0 | 0 | 86   | 1.433333 | 0.333675 | 0        | Unclassified | chr8:105156894-105311011  | 152.118 |
| Pdzrn3        | 0 | 0 | 0 | 195  | 3.25     | 0.049942 | 0        | Unclassified | chr6:101099600-101329891  | 228.292 |
| Clec4b1       | 0 | 0 | 0 | 10   | 0.166667 | 0.030491 | 0.719692 | Unclassified | chr6:122998023-123021562  | 21.54   |
| Gm1673        | 0 | 0 | 0 | 5    | 0.083333 | 2.24419  | 4        | Unclassified | chr5:34324122-34327654    | 1.533   |
| Lace1         | 0 | 0 | 0 | 568  | 9.466667 | 2.44772  | 35.53568 | Stalled      | chr10:42032390-42200371   | 165.982 |
| Olfr1490      | 0 | 0 | 0 | 1    | 0.016667 | 0.026953 | 1        | Unclassified | chr19:13726935-13729886   | 0.952   |
| Prss32        | 0 | 0 | 0 | 13   | 0.216667 | 0.061448 | 2.084791 | Unclassified | chr17:23988738-23996743   | 6.006   |
| Cd160         | 0 | 0 | 0 | 107  | 1.783333 | 0.102    | 0        | Unclassified | chr3:96602685-96620444    | 15.76   |
| Trim36        | 0 | 0 | 0 | 124  | 2.066667 | 0.228921 | 0.556886 | Unclassified | chr18:46324955-46374261   | 47.307  |
| Hoxa10        | 0 | 0 | 0 | 19   | 0.316667 | 0.259669 | 0.799464 | Unclassified | chr6:52181197-52192853    | 9.657   |
| Coq5          | 0 | 0 | 0 | 414  | 6.9      | 11.3414  | 9.905226 | Unclassified | chr5:115727710-115746981  | 17.272  |
| Cdk18         | 0 | 0 | 0 | 70   | 1.166667 | 0.740536 | 2.042953 | Unclassified | chr1:134010123-134038262  | 26.14   |
| Car13         | 0 | 0 | 0 | 173  | 2.883333 | 4.409    | 12.03809 | Stalled      | chr3:14639726-14663002    | 21.277  |
| Hoxa1         | 0 | 0 | 0 | 18   | 0.3      | 0.300464 | 9.257453 | Unclassified | chr6:52105365-52110316    | 2.952   |
| Aqp2          | 0 | 0 | 0 | 10   | 0.166667 | 0.117664 | 0.359539 | Unclassified | chr15:99407486-99414976   | 5.491   |
| D10Wsu102e    | 0 | 0 | 0 | 450  | 7.5      | 12.7819  | 10.50392 | Unclassified | chr10:82820965-82831580   | 8.616   |
| Zfpm2         | 0 | 0 | 0 | 215  | 3.583333 | 0.066993 | 1.358113 | Unclassified | chr15:40484587-40936138   | 449.552 |
| Zfx           | 0 | 0 | 0 | 768  | 12.8     | 2.25915  | 16.23329 | Unclassified | chrX:91319969-91370746    | 48.778  |
| Zfy1          | 0 | 0 | 0 | 7    | 0.116667 | 0.006897 | 0        | Unclassified | chrY:61649-135852         | 72.204  |
| Zfy2          | 0 | 0 | 0 | 11   | 0.183333 | 0.006821 | 0        | Unclassified | chrY:1362122-1428357      | 64.236  |
| Igfbpl1       | 0 | 0 | 0 | 25   | 0.416667 | 0.089231 | 0.874658 | Unclassified | chr4:45822378-45841699    | 17.322  |
| 2610036D13Rik | 0 | 0 | 0 | 186  | 3.1      | 5.78826  | 1.493917 | Unclassified | chr2:157807538-157837096  | 27.559  |
| Zfp820        | 0 | 0 | 0 | 24   | 0.4      | 0.249904 | 1.117971 | Unclassified | chr17:21953842-21984726   | 28.885  |
| Arl5a         | 0 | 0 | 0 | 442  | 7.366667 | 4.39936  | 23.11196 | Unclassified | chr2:52253470-52282394    | 26.925  |
| Pde6c         | 0 | 0 | 0 | 92   | 1.533333 | 0.02478  | 0.720989 | Unclassified | chr19:38205270-38258439   | 51.17   |
| Pin1          | 0 | 0 | 0 | 7    | 0.116667 | 5.80634  | 0.214577 | Unclassified | chr2:104554082-104558447  | 2.366   |
| Secisbp2      | 0 | 0 | 0 | 1550 | 25.83333 | 10.3289  | 15.86858 | Unclassified | chr13:51745082-51779015   | 31.934  |
| Zmynd15       | 0 | 0 | 0 | 41   | 0.683333 | 0.227348 | 1.198717 | Unclassified | chr11:70271123-70279701   | 6.579   |
| Taar4         | 0 | 0 | 0 | 3    | 0.05     | 0.024552 | 2        | Unclassified | chr10:23678299-23681343   | 1.045   |
| Taar2         | 0 | 0 | 0 | 2    | 0.033333 | 0.037695 | 0        | Unclassified | chr10:23656377-23661389   | 3.013   |
| Tex24         | 0 | 0 | 0 | 2    | 0.033333 | 0.043492 | 0        | Unclassified | chr8:28452865-28459659    | 4.795   |
| Taar7b        | 0 | 0 | 0 | 0    | 0        | 0.014348 | 0        | Unclassified | chr10:23717744-23720821   | 1.078   |
| 9230107M04Rik | 0 | 0 | 0 | 11   | 0.183333 | 0        | 0.603222 | Unclassified | chr7:14140214-14158416    | 16.203  |
| Gnal1         | 0 | 0 | 0 | 548  | 9.133333 | 31.7866  | 11.91761 | Unclassified | chr17:36114899-36126407   | 9.509   |
| Ehmt1         | 0 | 0 | 0 | 1226 | 20.43333 | 7.54827  | 36.27905 | Unclassified | chr2:24646293-24777110    | 128.818 |



|               |   |         |   |      |          |          |          |              |                           |         |
|---------------|---|---------|---|------|----------|----------|----------|--------------|---------------------------|---------|
| Sesn2         | 0 | 0       | 0 | 462  | 7.7      | 11.3565  | 19.4585  | Unclassified | chr4:132048721-132068371  | 17.651  |
| Olfr809       | 0 | 0       | 0 | 2    | 0.033333 | 0.012954 | 0        | Unclassified | chr10:129210926-129213913 | 0.988   |
| Olfr554       | 0 | 0       | 0 | 1    | 0.016667 | 0.020136 | 1        | Unclassified | chr7:109786761-109789715  | 0.955   |
| Rbpj          | 0 | 0       | 0 | 1967 | 32.78333 | 4.71223  | 0.048734 | Unclassified | chr5:53945017-54048684    | 101.668 |
| Olfr129       | 0 | 0       | 0 | 1    | 0.016667 | 0.012876 | 0        | Unclassified | chr17:38191543-38194536   | 0.994   |
| Olfr110       | 0 | 0       | 0 | 5    | 0.083333 | 0        | 0        | Unclassified | chr17:37627412-37636619   | 7.208   |
| Olfr642       | 0 | 0       | 0 | 6    | 0.1      | 0        | 4        | Unclassified | chr7:111197921-111200866  | 0.946   |
| Olfr958       | 0 | 0       | 0 | 2    | 0.033333 | 0.027298 | 1        | Unclassified | chr9:39357515-39360454    | 0.94    |
| Olfr954       | 0 | 0       | 0 | 0    | 0        | 0.01353  | 0        | Unclassified | chr9:39267017-39269962    | 0.946   |
| Olfr135       | 0 | 0       | 0 | 2    | 0.033333 | 0        | 1        | Unclassified | chr17:38343191-38346130   | 0.94    |
| 4732415M23Rik | 0 | 0       | 0 | 205  | 3.416667 | 6.35799  | 51.59361 | Stalled      | chr8:125734757-125745945  | 9.189   |
| Pawr          | 0 | 0       | 0 | 74   | 1.233333 | 0.616978 | 3.914686 | Unclassified | chr10:107767244-107851447 | 82.204  |
| Snora70       | 0 | 0       | 0 | 119  | 1.983333 | 3.56749  | 56       | Unclassified | chrX:71515830-71517959    | 0.13    |
| Snora69       | 0 | 0       | 0 | 100  | 1.666667 | 3.57176  | 52       | Unclassified | chrX:34622906-34625028    | 0.123   |
| Trim3         | 0 | 0       | 0 | 112  | 1.866667 | 1.81257  | 9.7603   | Unclassified | chr7:112758983-112784013  | 23.031  |
| I11b          | 0 | 0       | 0 | 18   | 0.3      | 0.386325 | 0.809366 | Unclassified | chr2:129190315-129198856  | 6.542   |
| D2Erd750e     | 0 | 0       | 0 | 396  | 6.6      | 10.5739  | 6.155734 | Unclassified | chr2:118637738-118661947  | 22.21   |
| Rbmx          | 0 | 0       | 0 | 308  | 5.133333 | 10.7259  | 13.89668 | Unclassified | chrX:54639206-54648213    | 7.008   |
| Pygm          | 0 | 0       | 0 | 296  | 4.933333 | 1.82363  | 1.459823 | Elongating   | chr19:6382428-6398459     | 14.032  |
| Meig1         | 0 | 30.9346 | 0 | 25   | 0.416667 | 0.036307 | 1.159904 | Unclassified | chr2:3326314-3341920      | 13.607  |
| Irak1         | 0 | 0       | 0 | 443  | 7.383333 | 19.3464  | 5.42459  | Unclassified | chrX:71259256-71271260    | 10.005  |
| Hoxc12        | 0 | 0       | 0 | 8    | 0.133333 | 0.076016 | 0.285469 | Unclassified | chr15:102765283-102768948 | 1.666   |
| Higd1b        | 0 | 0       | 0 | 108  | 1.8      | 0        | 1.076988 | Elongating   | chr11:102695609-102699353 | 1.745   |
| Gm11567       | 0 | 0       | 0 | 0    | 0        | 0.017691 | 0        | Unclassified | chr11:99738500-99741543   | 1.044   |
| Cma1          | 0 | 0       | 0 | 2    | 0.033333 | 0.131022 | 2        | Unclassified | chr14:56560287-56565498   | 3.212   |
| Tsga13        | 0 | 0       | 0 | 31   | 0.516667 | 0.673952 | 0.771768 | Unclassified | chr6:30846980-30867573    | 18.594  |
| Mcpt2         | 0 | 0       | 0 | 8    | 0.133333 | 0        | 0.548884 | Unclassified | chr14:56658959-56663471   | 2.513   |
| Mcpt1         | 0 | 0       | 0 | 2    | 0.033333 | 0        | 0        | Unclassified | chr14:56634800-56639228   | 2.429   |
| Mcpt4         | 0 | 0       | 0 | 5    | 0.083333 | 0.090528 | 1.221184 | Unclassified | chr14:56678580-56683147   | 2.568   |
| 4930430A15Rik | 0 | 0       | 0 | 11   | 0.183333 | 0.013946 | 0        | Unclassified | chr2:111033410-111071757  | 36.348  |
| Anapc1        | 0 | 0       | 0 | 1270 | 21.16667 | 11.8842  | 16.69762 | Unclassified | chr2:128435818-128515131  | 77.314  |
| Inhbb         | 0 | 0       | 0 | 17   | 0.283333 | 0.201725 | 1.832436 | Unclassified | chr1:121312041-121320825  | 6.785   |
| Usp49         | 0 | 0       | 0 | 456  | 7.6      | 2.653    | 2.785012 | Elongating   | chr17:47765638-47821016   | 53.379  |
| A1661453      | 0 | 0       | 0 | 73   | 1.216667 | 0.107794 | 0.317314 | Unclassified | chr17:47571587-47607587   | 34.001  |
| Sic7a13       | 0 | 0       | 0 | 14   | 0.233333 | 0.036035 | 0.652053 | Unclassified | chr4:19743873-19769380    | 23.488  |
| Alox5         | 0 | 0       | 0 | 46   | 0.766667 | 0.068003 | 0.54999  | Unclassified | chr6:116360088-116413196  | 51.109  |
| Alox8         | 0 | 0       | 0 | 25   | 0.416667 | 0.188187 | 1.52621  | Unclassified | chr11:68997386-69013341   | 13.956  |
| Nmnat3        | 0 | 0       | 0 | 890  | 14.83333 | 5.42798  | 25.28844 | Unclassified | chr9:98195001-98311847    | 114.847 |
| Alox12e       | 0 | 0       | 0 | 12   | 0.2      | 0.105461 | 0.915317 | Unclassified | chr11:70129114-70138020   | 6.907   |
| Alox12        | 0 | 0       | 0 | 31   | 0.516667 | 0.197108 | 0.969314 | Unclassified | chr11:70054956-70070843   | 13.888  |
| Alox15        | 0 | 0       | 0 | 12   | 0.2      | 0.122111 | 0.99179  | Unclassified | chr11:70157648-70167533   | 7.886   |
| Alox12b       | 0 | 0       | 0 | 26   | 0.433333 | 0.021843 | 1.108509 | Unclassified | chr11:68968573-68983293   | 12.721  |
| Gm1679        | 0 | 0       | 0 | 6    | 0.1      | 0.09355  | 1        | Unclassified | chr5:110781114-110785106  | 1.993   |
| Rasef         | 0 | 0       | 0 | 27   | 0.45     | 0.014837 | 0        | Unclassified | chr4:73360482-73438506    | 76.025  |
| 0610012H03Rik | 0 | 0       | 0 | 153  | 2.55     | 0.059296 | 0.505761 | Unclassified | chr2:105062498-105220017  | 155.52  |
| Alk           | 0 | 0       | 0 | 625  | 10.41667 | 0.177583 | 3.258047 | Unclassified | chr17:72218327-72955647   | 735.321 |
| Hiat1         | 0 | 0       | 0 | 388  | 6.466667 | 8.52166  | 26.83562 | Stalled      | chr13:65166337-65216290   | 47.954  |
| Afap1l2       | 0 | 0       | 0 | 143  | 2.383333 | 0.025158 | 2.454145 | Unclassified | chr19:56986848-57084667   | 95.82   |
| 38780         | 0 | 0       | 0 | 330  | 5.5      | 15.9973  | 10.94452 | Unclassified | chr19:37280034-37298945   | 16.912  |
| Cacng8        | 0 | 0       | 0 | 47   | 0.783333 | 0.297669 | 0.311521 | Unclassified | chr7:3392458-3415366      | 20.909  |
| Cacng7        | 0 | 0       | 0 | 42   | 0.7      | 0.650103 | 1.314453 | Unclassified | chr7:3334684-3366537      | 29.854  |
| Zdjc          | 0 | 0       | 0 | 304  | 5.066667 | 15.4578  | 2.621869 | Elongating   | chr16:17145071-17148936   | 1.866   |
| Olfr295       | 0 | 0       | 0 | 1    | 0.016667 | 0        | 1        | Unclassified | chr7:93731786-93734716    | 0.931   |
| Plk2          | 0 | 0       | 0 | 142  | 2.366667 | 1.74331  | 24.42507 | Stalled      | chr13:111183251-111191051 | 5.801   |
| Als2cr12      | 0 | 0       | 0 | 46   | 0.766667 | 0.05283  | 1.384896 | Unclassified | chr1:58714963-58754833    | 37.871  |
| Zfp354a       | 0 | 0       | 0 | 15   | 0.25     | 0.063981 | 0        | Unclassified | chr11:50870758-50886301   | 13.544  |
| Hoxc13        | 0 | 0       | 0 | 7    | 0.116667 | 0.11589  | 0.625643 | Unclassified | chr15:102749561-102759245 | 7.685   |
| Large         | 0 | 0       | 0 | 382  | 6.366667 | 0.083835 | 3.595872 | Unclassified | chr8:75338497-75878455    | 537.959 |
| Sic6a19       | 0 | 0       | 0 | 33   | 0.55     | 0.042038 | 1.277446 | Unclassified | chr13:73818604-73840143   | 19.54   |
| Anpnp         | 0 | 0       | 0 | 33   | 0.55     | 0.116137 | 2.055669 | Unclassified | chr7:86966690-86989238    | 20.549  |
| 4432412L15Rik | 0 | 0       | 0 | 67   | 1.116667 | 0.36633  | 0.217841 | Unclassified | chr8:86543372-86554194    | 8.823   |
| Lats1         | 0 | 0       | 0 | 973  | 16.21667 | 3.08295  | 20.4606  | Unclassified | chr10:7399006-7436259     | 35.254  |
| Rsl24d1       | 0 | 0       | 0 | 406  | 6.766667 | 14.841   | 8.010434 | Unclassified | chr9:72959275-72971140    | 9.866   |
| Crtam         | 0 | 0       | 0 | 52   | 0.866667 | 0.027327 | 2.437525 | Unclassified | chr9:40780880-40814669    | 31.79   |
| Tas2r131      | 0 | 0       | 0 | 0    | 0        | 0        | 0        | Unclassified | chr6:132906929-132909862  | 0.934   |
| Tas2r129      | 0 | 0       | 0 | 1    | 0.016667 | 0        | 0        | Unclassified | chr6:132899119-132902082  | 0.964   |
| Tas2r130      | 0 | 0       | 0 | 1    | 0.016667 | 0        | 1        | Unclassified | chr6:131579909-131582848  | 0.94    |
| Zfhx2         | 0 | 0       | 0 | 156  | 2.6      | 0.907274 | 5.667487 | Unclassified | chr14:55680495-55712885   | 30.391  |
| Tas2r126      | 0 | 0       | 0 | 1    | 0.016667 | 0.041477 | 1        | Unclassified | chr6:42382533-42385460    | 0.928   |
| Pik3r4        | 0 | 0       | 0 | 441  | 7.35     | 8.10475  | 14.08209 | Unclassified | chr9:105543324-105589985  | 44.662  |
| Tas2r124      | 0 | 0       | 0 | 2    | 0.033333 | 0        | 1        | Unclassified | chr6:132702747-132705677  | 0.931   |
| Olfr466       | 0 | 0       | 0 | 2    | 0.033333 | 0.055302 | 2        | Unclassified | chr13:65251533-65254460   | 0.928   |
| 4930473A06Rik | 0 | 0       | 0 | 763  | 12.71667 | 1.29406  | 140.1213 | Stalled      | chr4:83169448-83510574    | 339.127 |
| Olfr655       | 0 | 0       | 0 | 6    | 0.1      | 0.027681 | 2        | Unclassified | chr7:111744767-111747693  | 0.927   |
| Skil          | 0 | 0       | 0 | 1464 | 24.4     | 5.11036  | 7.374444 | Unclassified | chr3:30991982-31021499    | 27.518  |
| Olfr1156      | 0 | 0       | 0 | 1    | 0.016667 | 0        | 0        | Unclassified | chr2:87789346-87792422    | 1.077   |
| Sycp1         | 0 | 0       | 0 | 33   | 0.55     | 0.00372  | 4.031832 | Unclassified | chr3:102622421-102742023  | 117.603 |
| Udqln3        | 0 | 0       | 0 | 4    | 0.066667 | 0.01623  | 0        | Unclassified | chr7:111289136-111293786  | 2.651   |
| Fads6         | 0 | 0       | 0 | 23   | 0.383333 | 0.393393 | 1.746927 | Unclassified | chr11:115144680-115160860 | 14.181  |
| Ugqlnl        | 0 | 0       | 0 | 4    | 0.066667 | 0.027886 | 0.393756 | Unclassified | chr7:111296772-111301070  | 2.299   |
| Gm14092       | 0 | 0       | 0 | 6    | 0.1      | 0.077718 | 0.475286 | Unclassified | chr2:145375190-145382718  | 5.529   |
| Hbq1          | 0 | 0       | 0 | 4    | 0.066667 | 0.889337 | 4        | Unclassified | chr11:32198068-32200873   | 0.806   |
| Cep152        | 0 | 0       | 0 | 784  | 13.06667 | 4.7165   | 16.29161 | Unclassified | chr2:125388823-125452849  | 62.027  |
| Sftpb         | 0 | 0       | 0 | 191  | 3.183333 | 0.136853 | 0.050589 | Unclassified | chr6:72251241-72264364    | 11.124  |
| Npvf          | 0 | 0       | 0 | 4    | 0.066667 | 0        | 0        | Unclassified | chr6:50600869-50606392    | 3.524   |
| Tek           | 0 | 0       | 0 | 83   | 1.383333 | 0.055    | 2.556786 | Unclassified | chr4:94403990-94541630    | 135.641 |

|                      |   |   |   |      |          |          |          |              |                           |         |
|----------------------|---|---|---|------|----------|----------|----------|--------------|---------------------------|---------|
| <b>Tectb</b>         | 0 | 0 | 0 | 21   | 0.35     | 0.112878 | 0.863296 | Unclassified | chr19:55253374-55270803   | 15.43   |
| <b>Tef</b>           | 0 | 0 | 0 | 393  | 6.55     | 5.33269  | 20.03506 | Unclassified | chr15:81639843-81657291   | 15.449  |
| <b>Tec</b>           | 0 | 0 | 0 | 1029 | 17.15    | 3.10001  | 30.93962 | Unclassified | chr5:73146961-73261687    | 112.727 |
| <b>Olfr665</b>       | 0 | 0 | 0 | 0    | 0        | 0        | 0        | Unclassified | chr7:112027222-112030173  | 0.952   |
| <b>Wbscr25</b>       | 0 | 0 | 0 | 14   | 0.233333 | 0.077713 | 1.036879 | Unclassified | chr5:135463302-135479220  | 13.919  |
| <b>Thoc4</b>         | 0 | 0 | 0 | 716  | 11.93333 | 62.0116  | 6.699077 | Unclassified | chr11:120455829-120461679 | 3.851   |
| <b>Ccdc39</b>        | 0 | 0 | 0 | 167  | 2.783333 | 0.323167 | 0.315906 | Unclassified | chr3:33711282-33745232    | 31.951  |
| <b>Olfr926</b>       | 0 | 0 | 0 | 0    | 0        | 0        | 0        | Unclassified | chr9:38682762-38685689    | 0.928   |
| <b>Ccdc122</b>       | 0 | 0 | 0 | 216  | 3.6      | 1.94326  | 54.74657 | Stalled      | chr14:77434578-77512011   | 75.434  |
| <b>Tekt1</b>         | 0 | 0 | 0 | 29   | 0.483333 | 0.237002 | 1.609681 | Unclassified | chr11:72158221-72177382   | 17.162  |
| <b>Fam116a</b>       | 0 | 0 | 0 | 703  | 11.71667 | 3.92502  | 37.78598 | Unclassified | chr14:27397035-27451583   | 52.549  |
| <b>Capn6</b>         | 0 | 0 | 0 | 12   | 0.2      | 0.021643 | 1.414811 | Unclassified | chrX:140236779-140263955  | 25.177  |
| <b>Capn7</b>         | 0 | 0 | 0 | 743  | 12.38333 | 8.03205  | 26.89729 | Unclassified | chr14:32147909-32185169   | 35.261  |
| <b>Capn2</b>         | 0 | 0 | 0 | 494  | 8.233333 | 8.55405  | 10.38176 | Unclassified | chr1:184397389-184449614  | 50.226  |
| <b>Capns1</b>        | 0 | 0 | 0 | 242  | 4.033333 | 63.2631  | 5.516993 | Unclassified | chr7:30971960-30982067    | 8.108   |
| <b>Rnf44</b>         | 0 | 0 | 0 | 815  | 13.58333 | 20.7158  | 7.716954 | Unclassified | chr13:54780761-54791561   | 8.801   |
| <b>Trim6</b>         | 0 | 0 | 0 | 54   | 0.9      | 0.365009 | 6.577906 | Unclassified | chr7:111365308-111383666  | 16.359  |
| <b>Rufy2</b>         | 0 | 0 | 0 | 790  | 13.16667 | 2.10181  | 6.421092 | Unclassified | chr10:62440970-62481490   | 38.521  |
| <b>Nkx2-6</b>        | 0 | 0 | 0 | 10   | 0.166667 | 0.586903 | 0.218953 | Unclassified | chr14:69788075-69793597   | 3.523   |
| <b>Pilrb2</b>        | 0 | 0 | 0 | 3    | 0.05     | 0.071093 | 0        | Unclassified | chr5:138307056-138314986  | 5.931   |
| <b>Nos1ap</b>        | 0 | 0 | 0 | 344  | 5.733333 | 1.09852  | 4.963632 | Unclassified | chr1:172247626-172521980  | 272.355 |
| <b>Phkg1</b>         | 0 | 0 | 0 | 112  | 1.866667 | 0.250667 | 5.568063 | Unclassified | chr5:130339310-130356954  | 15.645  |
| <b>9530003J23Rik</b> | 0 | 0 | 0 | 8    | 0.133333 | 0.073597 | 1.701299 | Unclassified | chr10:116670808-116677737 | 4.93    |
| <b>Nkx2-5</b>        | 0 | 0 | 0 | 12   | 0.2      | 0.277519 | 0.576247 | Unclassified | chr17:26975609-26980510   | 2.902   |
| <b>Rngtt</b>         | 0 | 0 | 0 | 1286 | 21.43333 | 3.51921  | 23.98023 | Unclassified | chr4:33395285-33589585    | 192.301 |
| <b>Olfr1229</b>      | 0 | 0 | 0 | 1    | 0.016667 | 0        | 1        | Unclassified | chr2:89122352-89125288    | 0.937   |
| <b>Olfr1467</b>      | 0 | 0 | 0 | 2    | 0.033333 | 0        | 1        | Unclassified | chr19:13437119-13440046   | 0.928   |
| <b>Phtf1</b>         | 0 | 0 | 0 | 854  | 14.23333 | 0        | 28.30649 | Unclassified | chr3:103770180-103811411  | 39.232  |
| <b>Lzts2</b>         | 0 | 0 | 0 | 61   | 1.016667 | 0.530624 | 3.011019 | Unclassified | chr19:45087665-45101594   | 11.93   |
| <b>Fam178a</b>       | 0 | 0 | 0 | 685  | 11.41667 | 4.91334  | 30.43605 | Unclassified | chr19:45003608-45058277   | 52.67   |
| <b>Hoxd1</b>         | 0 | 0 | 0 | 5    | 0.083333 | 0.185652 | 1.103666 | Unclassified | chr2:74599036-74603199    | 2.164   |
| <b>Tmem126b</b>      | 0 | 0 | 0 | 218  | 3.633333 | 8.22042  | 63.3919  | Stalled      | chr7:97617338-97626505    | 7.168   |
| <b>Mobkl1a</b>       | 0 | 0 | 0 | 716  | 11.93333 | 2.14593  | 43.12986 | Unclassified | chr5:89147895-89187480    | 37.586  |
| <b>Ces3</b>          | 0 | 0 | 0 | 19   | 0.316667 | 0.039114 | 0.657637 | Unclassified | chr8:95689970-95723703    | 31.734  |
| <b>Spats2l</b>       | 0 | 0 | 0 | 167  | 2.783333 | 0.033174 | 1.034593 | Unclassified | chr1:57829704-58005241    | 173.538 |
| <b>Pfdn1</b>         | 0 | 0 | 0 | 378  | 6.3      | 25.0399  | 13.09363 | Unclassified | chr18:36563332-36616149   | 50.818  |
| <b>Oas1f</b>         | 0 | 0 | 0 | 14   | 0.233333 | 0.172981 | 0.933075 | Unclassified | chr5:121295375-121307994  | 10.62   |
| <b>Ube2t</b>         | 0 | 0 | 0 | 195  | 3.25     | 12.59    | 33.27676 | Stalled      | chr1:136857153-136870714  | 11.562  |
| <b>Zcrb1</b>         | 0 | 0 | 0 | 483  | 8.05     | 24.4146  | 17.57599 | Unclassified | chr15:93216543-93230721   | 12.179  |
| <b>Sic7a8</b>        | 0 | 0 | 0 | 90   | 1.5      | 1.07659  | 3.835589 | Unclassified | chr14:55341051-55402723   | 59.673  |
| <b>Lrp2bp</b>        | 0 | 0 | 0 | 114  | 1.9      | 0.082444 | 0.887323 | Unclassified | chr8:47093955-47114830    | 18.876  |
| <b>Prdm12</b>        | 0 | 0 | 0 | 32   | 0.533333 | 0.798607 | 0.659517 | Unclassified | chr2:31493556-31511315    | 15.76   |
| <b>Map3k10</b>       | 0 | 0 | 0 | 208  | 3.466667 | 5.84463  | 15.78185 | Stalled      | chr7:28441395-28461617    | 18.223  |
| <b>Gm12769</b>       | 0 | 0 | 0 | 4    | 0.066667 | 0        | 2        | Unclassified | chr7:34526817-34530122    | 1.306   |
| <b>Gm996</b>         | 0 | 0 | 0 | 66   | 1.1      | 1.02334  | 1.15917  | Unclassified | chr2:25430935-25437619    | 4.685   |
| <b>Cdca71</b>        | 0 | 0 | 0 | 463  | 7.716667 | 7.30911  | 22.15125 | Unclassified | chr12:119080333-119117179 | 34.847  |
| <b>Nudt2l</b>        | 0 | 0 | 0 | 404  | 6.733333 | 24.5377  | 13.8626  | Unclassified | chr8:96543302-96562939    | 17.638  |
| <b>1700123K08Rik</b> | 0 | 0 | 0 | 4    | 0.066667 | 0.024482 | 0.481328 | Unclassified | chr5:139003067-139007922  | 2.856   |
| <b>S100z</b>         | 0 | 0 | 0 | 1    | 0.016667 | 0.128163 | 0        | Unclassified | chr13:96247255-96250610   | 1.356   |
| <b>Rab1b</b>         | 0 | 0 | 0 | 287  | 4.783333 | 36.018   | 5.944731 | Unclassified | chr19:5099206-5108996     | 7.791   |
| <b>Tmbim4</b>        | 0 | 0 | 0 | 285  | 4.75     | 33.6847  | 6.855713 | Unclassified | chr10:119643881-119661953 | 16.073  |
| <b>1110021L09Rik</b> | 0 | 0 | 0 | 48   | 0.8      | 0.298159 | 1.199616 | Unclassified | chr10:23514791-23547774   | 30.984  |
| <b>Arpm1</b>         | 0 | 0 | 0 | 16   | 0.266667 | 0.33851  | 2.076035 | Unclassified | chr3:30495994-30500792    | 2.799   |
| <b>Pldc2</b>         | 0 | 0 | 0 | 192  | 3.2      | 0.767669 | 1.3502   | Unclassified | chr2:16275948-16673742    | 395.795 |
| <b>Cd9912</b>        | 0 | 0 | 0 | 261  | 4.35     | 3.62829  | 12.11557 | Stalled      | chrX:68673244-68747820    | 72.577  |
| <b>Acad8</b>         | 0 | 0 | 0 | 118  | 1.966667 | 2.1985   | 26.5619  | Stalled      | chr9:26781725-26809134    | 25.41   |
| <b>Gm5142</b>        | 0 | 0 | 0 | 6    | 0.1      | 0        | 1.655884 | Unclassified | chr14:59777339-59799586   | 20.248  |
| <b>Dusp28</b>        | 0 | 0 | 0 | 302  | 5.033333 | 8.35272  | 10.67276 | Unclassified | chr1:94801565-94805197    | 1.633   |
| <b>Ilkap</b>         | 0 | 0 | 0 | 856  | 14.26667 | 35.3045  | 9.521612 | Unclassified | chr1:93272407-93297360    | 22.954  |
| <b>C1qtnf4</b>       | 0 | 0 | 0 | 51   | 0.85     | 4.72149  | 0.327227 | Unclassified | chr2:90723942-90730683    | 4.742   |
| <b>Gdi1</b>          | 0 | 0 | 0 | 226  | 3.766667 | 36.0602  | 14.53604 | Unclassified | chrX:71548350-71557206    | 6.857   |
| <b>Gdf9</b>          | 0 | 0 | 0 | 11   | 0.183333 | 0.071044 | 0        | Unclassified | chr11:53244787-53251404   | 4.618   |
| <b>Nfe2l3</b>        | 0 | 0 | 0 | 300  | 5        | 0.690187 | 0.312675 | Unclassified | chr6:51380668-51408767    | 26.1    |
| <b>Olfr824</b>       | 0 | 0 | 0 | 0    | 0        | 0        | 0        | Unclassified | chr10:129563163-129566111 | 0.949   |
| <b>Olfr823</b>       | 0 | 0 | 0 | 0    | 0        | 0        | 0        | Unclassified | chr10:129548896-129551844 | 0.949   |
| <b>Gdf11</b>         | 0 | 0 | 0 | 127  | 2.116667 | 4.01911  | 1.816378 | Elongating   | chr10:128321601-128330774 | 7.174   |
| <b>Gdf10</b>         | 0 | 0 | 0 | 10   | 0.166667 | 0.061298 | 0        | Unclassified | chr14:34734772-34748468   | 11.697  |
| <b>Olfr815</b>       | 0 | 0 | 0 | 0    | 0        | 0.013445 | 0        | Unclassified | chr10:129338831-129341782 | 0.952   |
| <b>Olfr816</b>       | 0 | 0 | 0 | 1    | 0.016667 | 0        | 0        | Unclassified | chr10:129348393-129351332 | 0.94    |
| <b>Olfr822</b>       | 0 | 0 | 0 | 0    | 0        | 0        | 0        | Unclassified | chr10:129509467-129512406 | 0.94    |
| <b>Olfr740</b>       | 0 | 0 | 0 | 0    | 0        | 0.009646 | 0        | Unclassified | chr14:51070728-51073662   | 0.935   |
| <b>Olfr736</b>       | 0 | 0 | 0 | 0    | 0        | 0.054596 | 0        | Unclassified | chr14:51010432-51013371   | 0.94    |
| <b>Gdi2</b>          | 0 | 0 | 0 | 1074 | 17.9     | 74.1721  | 11.67602 | Unclassified | chr13:3535320-3565507     | 28.188  |
| <b>Pou2f3</b>        | 0 | 0 | 0 | 112  | 1.866667 | 0.007617 | 0.425766 | Unclassified | chr9:42932021-43015838    | 81.818  |
| <b>5330437I02Rik</b> | 0 | 0 | 0 | 54   | 0.9      | 0.104385 | 2.106194 | Unclassified | chr18:65855921-65911191   | 53.271  |
| <b>Tdrd12</b>        | 0 | 0 | 0 | 36   | 0.6      | 0.031626 | 1.699695 | Unclassified | chr7:36278628-36324763    | 44.136  |
| <b>Neil3</b>         | 0 | 0 | 0 | 280  | 4.666667 | 7.08147  | 13.75039 | Stalled      | chr8:54672220-54726419    | 52.2    |
| <b>Tmcc3</b>         | 0 | 0 | 0 | 430  | 7.166667 | 1.94576  | 5.351484 | Unclassified | chr10:93975601-94053699   | 76.099  |
| <b>Ifna1</b>         | 0 | 0 | 0 | 2    | 0.033333 | 0.099135 | 1        | Unclassified | chr4:88493990-88496560    | 0.571   |
| <b>Arl2bp</b>        | 0 | 0 | 0 | 396  | 6.6      | 23.7227  | 8.750455 | Unclassified | chr8:97188654-97198322    | 7.669   |
| <b>Ifna11</b>        | 0 | 0 | 0 | 3    | 0.05     | 0        | 2        | Unclassified | chr4:88463822-88466469    | 0.648   |
| <b>Ifna2</b>         | 0 | 0 | 0 | 2    | 0.033333 | 0.067101 | 1        | Unclassified | chr4:88329110-88331683    | 0.574   |
| <b>Gm5065</b>        | 0 | 0 | 0 | 8    | 0.133333 | 0.05177  | 0        | Unclassified | chr7:5300142-5312283      | 10.142  |
| <b>Ifna5</b>         | 0 | 0 | 0 | 1    | 0.016667 | 0.027056 | 1        | Unclassified | chr4:88479428-88481998    | 0.571   |
| <b>Itga10</b>        | 0 | 0 | 0 | 69   | 1.15     | 0.858544 | 4.352518 | Unclassified | chr3:96447506-96468442    | 18.937  |
| <b>Fam19a2</b>       | 0 | 0 | 0 | 268  | 4.466667 | 0.142352 | 1.284659 | Unclassified | chr10:122699131-123178035 | 476.905 |

|               |   |          |   |      |          |          |          |              |                           |         |
|---------------|---|----------|---|------|----------|----------|----------|--------------|---------------------------|---------|
| Mon1a         | 0 | 0        | 0 | 232  | 3.866667 | 9.47443  | 14.01047 | Stalled      | chr9:107788459-107805470  | 15.012  |
| Tgif2         | 0 | 0        | 0 | 489  | 8.15     | 3.33666  | 6.174507 | Unclassified | chr2:156663812-156681267  | 15.456  |
| Lmx1a         | 0 | 0        | 0 | 134  | 2.233333 | 0.065272 | 1.658173 | Unclassified | chr1:169617688-169778864  | 159.177 |
| Snrbp2        | 0 | 0        | 0 | 226  | 3.766667 | 15.22    | 8.489706 | Unclassified | chr2:142886804-142897788  | 8.985   |
| Mark4         | 0 | 0        | 0 | 388  | 6.466667 | 7.93085  | 6.390628 | Unclassified | chr7:20011423-20045843    | 32.421  |
| Bloc1s3       | 0 | 0        | 0 | 417  | 6.95     | 4.95384  | 9.20174  | Unclassified | chr7:20091152-20095680    | 2.529   |
| Gm14139       | 0 | 0        | 0 | 5    | 0.083333 | 0.035085 | 1.55641  | Unclassified | chr2:150005490-150019015  | 11.526  |
| C79127        | 0 | 0        | 0 | 13   | 0.216667 | 0.26717  | 1.548868 | Unclassified | chr7:19862155-19867398    | 3.244   |
| Klc3          | 0 | 0        | 0 | 146  | 2.433333 | 2.52448  | 0.400369 | Unclassified | chr7:19979788-19987205    | 5.418   |
| Olfr1431      | 0 | 0        | 0 | 2    | 0.033333 | 0        | 1        | Unclassified | chr19:12282057-12284996   | 0.94    |
| Olfr463       | 0 | 0        | 0 | 4    | 0.066667 | 0        | 2        | Unclassified | chr11:87706488-87709424   | 0.937   |
| Scrg1         | 0 | 0        | 0 | 17   | 0.283333 | 0.054927 | 0        | Unclassified | chr8:59932719-59956382    | 21.664  |
| Mblac1        | 0 | 0        | 0 | 156  | 2.6      | 11.4457  | 10.67647 | Unclassified | chr5:138633541-138636628  | 1.088   |
| Olfr1420      | 0 | 0        | 0 | 3    | 0.05     | 0.124029 | 2        | Unclassified | chr19:11968512-11971442   | 0.931   |
| Nhirc2        | 0 | 0        | 0 | 856  | 14.26667 | 6.19848  | 14.56144 | Unclassified | chr9:56620750-56673336    | 50.587  |
| Abcb7         | 0 | 0        | 0 | 441  | 7.35     | 3.30991  | 49.65251 | Stalled      | chrX:101475903-101611185  | 133.283 |
| Psg21         | 0 | 0        | 0 | 7    | 0.116667 | 0.004884 | 1.388052 | Unclassified | chr7:19232002-19244074    | 10.073  |
| Sec1414       | 0 | 0        | 0 | 27   | 0.45     | 0.030494 | 0.796725 | Unclassified | chr11:3929784-3948012     | 16.229  |
| Wwc2          | 0 | 0        | 0 | 339  | 5.65     | 1.12135  | 6.819471 | Unclassified | chr8:48912963-49077905    | 162.943 |
| Vcam1         | 0 | 0        | 0 | 17   | 0.283333 | 0.082978 | 1.108999 | Unclassified | chr3:115812937-115834606  | 19.67   |
| Cyp3a25       | 0 | 0        | 0 | 8    | 0.133333 | 0.031948 | 0.817827 | Unclassified | chr5:146788769-146823193  | 32.425  |
| Mrps11        | 0 | 0        | 0 | 293  | 4.883333 | 19.731   | 12.09455 | Unclassified | chr7:85926016-85937874    | 9.859   |
| Sfrs6         | 0 | 0        | 0 | 934  | 15.56667 | 45.3483  | 8.727773 | Unclassified | chr2:162755243-162762854  | 5.612   |
| Nudt12        | 0 | 0        | 0 | 10   | 0.166667 | 0.595847 | 4.391744 | Unclassified | chr17:59140823-59154745   | 11.923  |
| 4921515J06Rik | 0 | 0        | 0 | 23   | 0.383333 | 0.061088 | 0.992291 | Unclassified | chr3:108741001-108763694  | 20.694  |
| 4921524J17Rik | 0 | 0        | 0 | 391  | 6.516667 | 5.8492   | 26.33385 | Unclassified | chr8:87932657-87958740    | 24.084  |
| 4921510H08Rik | 0 | 0        | 0 | 2    | 0.033333 | 0        | 1        | Unclassified | chr10:97153692-97157560   | 1.869   |
| Ggh           | 0 | 0        | 0 | 50   | 0.833333 | 5.25717  | 6.581688 | Unclassified | chr4:19967198-19993258    | 24.061  |
| Sic22a14      | 0 | 0        | 0 | 26   | 0.433333 | 0.069971 | 0.475429 | Unclassified | chr9:119078573-119101511  | 20.939  |
| D9Ert402e     | 0 | 0        | 0 | 325  | 5.416667 | 1.68278  | 53.31769 | Stalled      | chr9:122712664-122745449  | 30.786  |
| 2010015L04Rik | 0 | 0        | 0 | 75   | 1.25     | 0.645499 | 2.662461 | Unclassified | chr4:154781298-154817219  | 33.922  |
| Hfe           | 0 | 0        | 0 | 76   | 1.266667 | 0.729384 | 8.291231 | Unclassified | chr13:23795709-23804680   | 6.972   |
| Morc4         | 0 | 0        | 0 | 17   | 0.283333 | 0.06299  | 0.772963 | Unclassified | chrX:136357384-136408047  | 48.664  |
| Cdk1          | 0 | 0        | 0 | 1020 | 17       | 12.7677  | 5.392992 | Unclassified | chr10:68799382-68817660   | 16.279  |
| Cdc25a        | 0 | 0        | 0 | 935  | 15.58333 | 15.8415  | 6.422907 | Unclassified | chr9:109776082-109796394  | 18.313  |
| Sic30a9       | 0 | 0        | 0 | 550  | 9.166667 | 6.16456  | 73.26358 | Stalled      | chr5:67696195-67747384    | 49.19   |
| Gadl1         | 0 | 0        | 0 | 211  | 3.516667 | 0.05615  | 0.443438 | Unclassified | chr9:115816572-115985294  | 166.723 |
| Cdc73         | 0 | 0        | 0 | 839  | 13.98333 | 7.1582   | 25.90781 | Unclassified | chr1:145454628-145551814  | 95.187  |
| Ccdc116       | 0 | 0        | 0 | 93   | 1.55     | 0.44908  | 1.887749 | Elongating   | chr16:17139157-17146516   | 5.36    |
| Sfrs8         | 0 | 0        | 0 | 1928 | 32.13333 | 20.345   | 8.534947 | Unclassified | chr5:130005105-130077259  | 70.155  |
| Rab36         | 0 | 0        | 0 | 60   | 1        | 0.542982 | 4.859961 | Unclassified | chr10:74497833-74516845   | 17.013  |
| Cdc37         | 0 | 0        | 0 | 476  | 7.933333 | 86.121   | 5.112399 | Unclassified | chr9:20942984-20956350    | 11.367  |
| Myef2         | 0 | 0        | 0 | 534  | 8.9      | 11.1463  | 7.207022 | Unclassified | chr2:124913477-124951396  | 35.92   |
| Larp1         | 0 | 0        | 0 | 2738 | 45.63333 | 42.845   | 6.563523 | Unclassified | chr11:57820565-57875532   | 52.968  |
| Rsph3b        | 0 | 0        | 0 | 89   | 1.483333 | 9.08811  | 49.33265 | Stalled      | chr17:7109064-7154705     | 43.642  |
| Lrriq3        | 0 | 0        | 0 | 204  | 3.4      | 1.36372  | 92.80695 | Stalled      | chr3:154754397-154857242  | 100.846 |
| Ccdc25        | 0 | 0        | 0 | 563  | 9.383333 | 8.1233   | 13.81203 | Unclassified | chr14:66454138-66485441   | 29.304  |
| Clvs1         | 0 | 0        | 0 | 141  | 2.35     | 0.004418 | 0.567847 | Unclassified | chr4:9194508-9378838      | 182.331 |
| Kdr           | 0 | 0        | 0 | 54   | 0.9      | 0.404701 | 0.464038 | Unclassified | chr5:76329298-76376453    | 45.156  |
| Kera          | 0 | 0        | 0 | 6    | 0.1      | 0.013145 | 0        | Unclassified | chr10:97067838-97076322   | 6.485   |
| Ovgp1         | 0 | 0        | 0 | 47   | 0.783333 | 0.152273 | 3.690641 | Unclassified | chr3:105774719-105790341  | 13.623  |
| Chgb          | 0 | 0        | 0 | 21   | 0.35     | 0.112547 | 1.984184 | Unclassified | chr2:132605013-132620808  | 13.796  |
| Chga          | 0 | 0        | 0 | 39   | 0.65     | 0.430427 | 1.033657 | Unclassified | chr12:103791178-103803237 | 10.06   |
| Chi313        | 0 | 35.92405 | 0 | 18   | 0.3      | 0.095525 | 0.558966 | Unclassified | chr3:105950472-105972482  | 20.011  |
| Chi311        | 0 | 0        | 0 | 22   | 0.366667 | 0.05318  | 0        | Unclassified | chr1:136076980-136086606  | 7.627   |
| Ttc9          | 0 | 0        | 0 | 39   | 0.65     | 0.194567 | 0.468192 | Unclassified | chr12:82730355-82765928   | 33.574  |
| Act19         | 0 | 0        | 0 | 3    | 0.05     | 0        | 0        | Unclassified | chr17:33567843-33571212   | 1.37    |
| Nup35         | 0 | 0        | 0 | 201  | 3.35     | 3.19113  | 9.40375  | Unclassified | chr2:80476972-80499059    | 20.088  |
| Rgs7bp        | 0 | 0        | 0 | 82   | 1.366667 | 0.644213 | 2.349644 | Unclassified | chr13:105737232-105847010 | 107.779 |
| Psg26         | 0 | 0        | 0 | 2    | 0.033333 | 0.015002 | 0        | Unclassified | chr7:19059930-19071498    | 9.569   |
| Elf4          | 0 | 0        | 0 | 920  | 15.33333 | 7.62239  | 1.300031 | Elongating   | chrX:45764225-45818309    | 52.085  |
| Cib2          | 0 | 0        | 0 | 35   | 0.583333 | 1.5498   | 4.00273  | Unclassified | chr9:54393158-54409886    | 14.729  |
| Ruvbl1        | 0 | 0        | 0 | 686  | 11.43333 | 25.0918  | 6.248646 | Unclassified | chr6:88413416-88447560    | 32.145  |
| Srpk3         | 0 | 0        | 0 | 417  | 6.95     | 7.12218  | 2.107045 | Elongating   | chrX:71017760-71024263    | 4.504   |
| Inhbe         | 0 | 0        | 0 | 22   | 0.366667 | 0.21594  | 0.16388  | Unclassified | chr10:126786457-126790828 | 2.372   |
| Inhbc         | 0 | 0        | 0 | 12   | 0.2      | 0.026076 | 1.784769 | Unclassified | chr10:126793383-126809600 | 14.218  |
| Sic5a7        | 0 | 0        | 0 | 10   | 0.166667 | 0.030015 | 0        | Unclassified | chr17:54412914-54438487   | 23.574  |
| Inhba         | 0 | 0        | 0 | 17   | 0.283333 | 0.352051 | 0.439001 | Unclassified | chr13:16104307-16119044   | 12.738  |
| Inha          | 0 | 0        | 0 | 8    | 0.133333 | 0.035041 | 0        | Unclassified | chr1:75501651-75506929    | 3.279   |
| Xirp2         | 0 | 0        | 0 | 41   | 0.683333 | 0.007504 | 0.665569 | Unclassified | chr2:67282058-67364663    | 80.606  |
| Sic9a5        | 0 | 0        | 0 | 188  | 3.133333 | 2.48327  | 8.771314 | Unclassified | chr8:107870157-107893781  | 21.625  |
| Olfr544       | 0 | 0        | 0 | 22   | 0.366667 | 0.037918 | 1.114859 | Unclassified | chr7:109632627-109638821  | 4.195   |
| Olfr106       | 0 | 0        | 0 | 1    | 0.016667 | 0.009554 | 0        | Unclassified | chr17:37529474-37532455   | 0.982   |
| Olfr128       | 0 | 0        | 0 | 1    | 0.016667 | 0.014218 | 1        | Unclassified | chr17:38058512-38061439   | 0.928   |
| Cyp2w1        | 0 | 0        | 0 | 60   | 1        | 0        | 0.31993  | Unclassified | chr5:139826570-139832987  | 4.418   |
| Mtmt14        | 0 | 0        | 0 | 1317 | 21.95    | 26.0322  | 7.61225  | Unclassified | chr6:113185836-113231386  | 43.551  |
| Olfr299       | 0 | 0        | 0 | 0    | 0        | 0.025813 | 0        | Unclassified | chr7:93611922-93614915    | 0.994   |
| Mfsd6l        | 0 | 0        | 0 | 20   | 0.333333 | 0.149316 | 1.352358 | Unclassified | chr11:68367687-68371747   | 2.061   |
| Krtap1-5      | 0 | 0        | 0 | 3    | 0.05     | 0        | 1        | Unclassified | chr11:99441290-99444330   | 1.041   |
| Tmbim1        | 0 | 0        | 0 | 266  | 4.433333 | 4.52785  | 5.577542 | Unclassified | chr1:74334821-74352910    | 16.09   |
| 2310061I04Rik | 0 | 0        | 0 | 328  | 5.466667 | 10.9338  | 4.804869 | Unclassified | chr17:36029621-36036323   | 4.703   |
| Dedd          | 0 | 0        | 0 | 495  | 8.25     | 10.3635  | 12.62314 | Unclassified | chr1:173257275-173272632  | 13.358  |
| Cd40lg        | 0 | 0        | 0 | 10   | 0.166667 | 0.030759 | 1.217921 | Unclassified | chrX:54463319-54477219    | 11.901  |
| Pglyrp1       | 0 | 0        | 0 | 24   | 0.4      | 2.14546  | 2.835821 | Unclassified | chr7:19468038-19475787    | 5.75    |
| Caln1         | 0 | 0        | 0 | 386  | 6.433333 | 0.069627 | 0        | Unclassified | chr5:130843327-131316515  | 471.189 |
| Cd27          | 0 | 0        | 0 | 98   | 1.633333 | 0.7075   | 1.001961 | Elongating   | chr6:125182639-125189045  | 4.407   |

|               |   |   |   |      |           |          |          |              |                           |         |
|---------------|---|---|---|------|-----------|----------|----------|--------------|---------------------------|---------|
| Tnfsf11       | 0 | 0 | 0 | 44   | 0.733333  | 0.521828 | 1.832784 | Unclassified | chr14:78677252-78709850   | 30.599  |
| Tnfrsf9       | 0 | 0 | 0 | 70   | 1.166667  | 0.309046 | 1.434692 | Unclassified | chr4:150292263-150320211  | 25.949  |
| Tnfsf8        | 0 | 0 | 0 | 102  | 1.7       | 0.661525 | 1.569744 | Unclassified | chr4:63493857-63524318    | 28.462  |
| Cd70          | 0 | 0 | 0 | 20   | 0.333333  | 1.29381  | 2.125106 | Unclassified | chr17:57285419-57291200   | 3.782   |
| Prr3          | 0 | 0 | 0 | 542  | 9.033333  | 18.7958  | 13.60071 | Unclassified | chr17:36109483-36118412   | 6.93    |
| Svip          | 0 | 0 | 0 | 18   | 0.3       | 1.46105  | 3.080188 | Unclassified | chr7:59252531-59263388    | 8.858   |
| Dusp18        | 0 | 0 | 0 | 30   | 0.5       | 0.426021 | 6.476312 | Unclassified | chr11:3793242-3801299     | 6.058   |
| Pvr           | 0 | 0 | 0 | 295  | 4.916667  | 4.04813  | 8.09946  | Unclassified | chr7:20488928-20508492    | 17.565  |
| Olfir1045     | 0 | 0 | 0 | 0    | 0         | 0.046503 | 0        | Unclassified | chr2:86037959-86040907    | 0.949   |
| Pebp1         | 0 | 0 | 0 | 179  | 2.983333  | 43.5969  | 5.792199 | Unclassified | chr5:117732659-117739573  | 4.915   |
| Gm11564       | 0 | 0 | 0 | 1    | 0.016667  | 0.037095 | 1        | Unclassified | chr11:99676289-99678980   | 0.692   |
| Msr1          | 0 | 0 | 0 | 23   | 0.383333  | 0.243561 | 0        | Unclassified | chr8:40667053-40730032    | 60.98   |
| Rad54b        | 0 | 0 | 0 | 508  | 8.466667  | 2.01234  | 33.74757 | Stalled      | chr4:11484118-11542954    | 56.837  |
| 9030625A04Rik | 0 | 0 | 0 | 187  | 3.116667  | 4.56082  | 18.91541 | Stalled      | chr14:77424007-77438424   | 12.418  |
| Evi5          | 0 | 0 | 0 | 527  | 8.783333  | 1.01673  | 0.397087 | Unclassified | chr5:108173813-108306126  | 130.314 |
| Mefv          | 0 | 0 | 0 | 23   | 0.383333  | 0.182321 | 1.841323 | Unclassified | chr16:3707215-3720124     | 10.91   |
| Evpl          | 0 | 0 | 0 | 85   | 1.416667  | 0.234372 | 3.157995 | Unclassified | chr11:116081872-116101405 | 17.534  |
| Unc5d         | 0 | 0 | 0 | 312  | 5.2       | 0.065294 | 1.949906 | Unclassified | chr8:29757188-30332108    | 572.921 |
| Evx1          | 0 | 0 | 0 | 13   | 0.216667  | 0.066821 | 1.426944 | Unclassified | chr6:52261491-52268372    | 4.882   |
| Evx2          | 0 | 0 | 0 | 11   | 0.183333  | 0.251051 | 0.955707 | Unclassified | chr2:74493672-74499476    | 3.805   |
| Scap          | 0 | 0 | 0 | 1017 | 16.95     | 18.7651  | 5.84488  | Unclassified | chr9:110233796-110287450  | 51.655  |
| Plekha8       | 0 | 0 | 0 | 55   | 0.916667  | 0.702566 | 0.444889 | Unclassified | chr6:54551140-54595814    | 42.675  |
| Klrb1a        | 0 | 0 | 0 | 5    | 0.083333  | 0.044354 | 0.760608 | Unclassified | chr6:128559244-128574952  | 13.709  |
| Chmp5         | 0 | 0 | 0 | 354  | 5.9       | 10.9628  | 35.37299 | Stalled      | chr4:40893585-40912335    | 16.751  |
| Aen           | 0 | 0 | 0 | 806  | 13.433333 | 19.7366  | 3.909797 | Unclassified | chr7:86038812-86053719    | 12.908  |
| 2700062C07Rik | 0 | 0 | 0 | 169  | 2.816667  | 5.66023  | 5.226196 | Unclassified | chr18:24627371-24636268   | 6.898   |
| 2700060E02Rik | 0 | 0 | 0 | 262  | 4.366667  | 26.4757  | 13.21492 | Unclassified | chr14:20630623-20645045   | 12.423  |
| Chac2         | 0 | 0 | 0 | 243  | 4.05      | 6.02159  | 22.39425 | Stalled      | chr11:30876708-30888365   | 9.658   |
| N6amt2        | 0 | 0 | 0 | 286  | 4.766667  | 7.29691  | 34.29435 | Stalled      | chr14:58168434-58192406   | 21.974  |
| Tas2r118      | 0 | 0 | 0 | 0    | 0         | 0        | 0        | Unclassified | chr6:23919160-23922060    | 0.901   |
| Mid1ip1       | 0 | 0 | 0 | 482  | 8.033333  | 35.5721  | 2.284683 | Elongating   | chrX:10292490-10296827    | 2.338   |
| Klrb1c        | 0 | 0 | 0 | 6    | 0.1       | 0.081243 | 0.646793 | Unclassified | chr6:128728504-128740659  | 10.156  |
| Tas2r114      | 0 | 0 | 0 | 1    | 0.016667  | 0        | 0        | Unclassified | chr6:131639151-131642081  | 0.931   |
| Defb1         | 0 | 0 | 0 | 9    | 0.15      | 0        | 1.558148 | Unclassified | chr8:22885026-22905657    | 18.632  |
| Ppp4r2        | 0 | 0 | 0 | 633  | 10.55     | 7.97851  | 8.002098 | Unclassified | chr6:100781631-100818711  | 35.081  |
| Gas6          | 0 | 0 | 0 | 49   | 0.816667  | 0.410241 | 1.978767 | Unclassified | chr8:13465373-13496535    | 29.163  |
| Tas2r106      | 0 | 0 | 0 | 0    | 0         | 0        | 0        | Unclassified | chr6:131627977-131630904  | 0.928   |
| Polb          | 0 | 0 | 0 | 358  | 5.966667  | 9.00226  | 16.33369 | Unclassified | chr8:23738590-23765909    | 25.32   |
| 4930579C15Rik | 0 | 0 | 0 | 13   | 0.216667  | 0.041747 | 0        | Unclassified | chr4:94573983-94597501    | 21.519  |
| Tas2r140      | 0 | 0 | 0 | 1    | 0.016667  | 0        | 1        | Unclassified | chr6:133004872-133007811  | 0.94    |
| Cd109         | 0 | 0 | 0 | 99   | 1.65      | 0.100118 | 3.117162 | Unclassified | chr9:78461583-78564060    | 100.478 |
| Prkcdbp       | 0 | 0 | 0 | 5    | 0.083333  | 0.137407 | 0.67712  | Unclassified | chr7:112629129-112632711  | 1.583   |
| Col5a3        | 0 | 0 | 0 | 87   | 1.45      | 0.069494 | 0        | Unclassified | chr9:20574493-20621478    | 44.986  |
| Gas2          | 0 | 0 | 0 | 172  | 2.866667  | 1.01922  | 8.217411 | Unclassified | chr7:59132514-59249828    | 115.315 |
| Rab11a        | 0 | 0 | 0 | 240  | 4         | 6.72373  | 34.84244 | Stalled      | chr9:64563106-64587563    | 22.458  |
| 4930455F23Rik | 0 | 0 | 0 | 118  | 1.966667  | 3.25408  | 19.88817 | Stalled      | chr1:166203728-166217976  | 12.249  |
| Gria1         | 0 | 0 | 0 | 280  | 4.666667  | 0.03846  | 0        | Unclassified | chr11:56823192-57143746   | 318.555 |
| Fkbp14        | 0 | 0 | 0 | 23   | 0.383333  | 0.847743 | 2.764473 | Unclassified | chr6:54527598-54545122    | 15.525  |
| H2-Ke2        | 0 | 0 | 0 | 196  | 3.266667  | 81.8145  | 7.028924 | Unclassified | chr17:34075853-34079288   | 1.436   |
| Polr1c        | 0 | 0 | 0 | 656  | 10.933333 | 45.5127  | 3.929908 | Unclassified | chr17:46380868-46386994   | 4.127   |
| Slc8a1        | 0 | 0 | 0 | 207  | 3.45      | 0.03314  | 0        | Unclassified | chr17:81772444-82139717   | 365.274 |
| Polr1d        | 0 | 0 | 0 | 931  | 15.51667  | 88.0234  | 7.830929 | Unclassified | chr5:147887116-147922935  | 33.82   |
| Mkrn1         | 0 | 0 | 0 | 503  | 8.383333  | 15.5485  | 15.78351 | Unclassified | chr6:39347819-39372368    | 22.55   |
| Gm815         | 0 | 0 | 0 | 6    | 0.1       | 0.082954 | 1.388829 | Unclassified | chr19:26958414-26963137   | 2.724   |
| Igfbp2        | 0 | 0 | 0 | 35   | 0.583333  | 0.167084 | 1.395722 | Unclassified | chr1:72869076-72899045    | 27.97   |
| Tox           | 0 | 0 | 0 | 342  | 5.7       | 1.00848  | 7.287162 | Unclassified | chr4:6614532-6919870      | 303.339 |
| Ccr11         | 0 | 0 | 0 | 67   | 1.116667  | 0.34329  | 1.571703 | Unclassified | chr9:104000467-104030973  | 28.507  |
| Creb5         | 0 | 0 | 0 | 188  | 3.133333  | 0.089219 | 1.200751 | Unclassified | chr6:53521367-53645826    | 122.46  |
| Obox6         | 0 | 0 | 0 | 3    | 0.05      | 0.028756 | 0.730857 | Unclassified | chr7:16418598-16427028    | 6.431   |
| Tecr1         | 0 | 0 | 0 | 37   | 0.616667  | 0        | 0        | Unclassified | chr5:83707146-83786220    | 77.075  |
| Omp           | 0 | 0 | 0 | 35   | 0.583333  | 0.361803 | 1.083038 | Unclassified | chr7:105291868-105295957  | 2.09    |
| Akap7         | 0 | 0 | 0 | 366  | 6.1       | 0.59084  | 0.261246 | Unclassified | chr10:24888895-25020969   | 130.075 |
| Omt2a         | 0 | 0 | 0 | 3    | 0.05      | 0.051982 | 1        | Unclassified | chr9:78159778-78163855    | 2.078   |
| Rasa1         | 0 | 0 | 0 | 603  | 10.05     | 5.63892  | 51.62263 | Stalled      | chr13:85354303-85431091   | 74.789  |
| Cog2          | 0 | 0 | 0 | 657  | 10.95     | 10.3356  | 9.246999 | Unclassified | chr8:127042666-127075905  | 31.24   |
| Slc25a40      | 0 | 0 | 0 | 355  | 5.916667  | 2.35038  | 63.50678 | Stalled      | chr5:8420849-8454793      | 31.945  |
| Acsd2         | 0 | 0 | 0 | 105  | 1.75      | 3.45579  | 9.260257 | Unclassified | chr2:155341778-155388479  | 44.702  |
| Podxl2        | 0 | 0 | 0 | 104  | 1.733333  | 0.730353 | 0.463738 | Unclassified | chr6:88792551-88826038    | 31.488  |
| Svs5          | 0 | 0 | 0 | 3    | 0.05      | 0.064082 | 0.773006 | Unclassified | chr2:164156500-164160129  | 1.63    |
| Hoxa11        | 0 | 0 | 0 | 10   | 0.166667  | 0.122747 | 0.695028 | Unclassified | chr6:52192104-52197766    | 3.663   |
| Stard7        | 0 | 0 | 0 | 692  | 11.533333 | 22.2282  | 50.21526 | Unclassified | chr2:127093964-127124670  | 28.707  |
| Mtrf1         | 0 | 0 | 0 | 144  | 2.4       | 7.16339  | 12.79647 | Stalled      | chr14:79795578-79823457   | 25.88   |
| Polrmt        | 0 | 0 | 0 | 205  | 3.416667  | 9.8543   | 7.223563 | Unclassified | chr10:79198869-79211326   | 10.458  |
| Kcne4         | 0 | 0 | 0 | 1    | 0.016667  | 0.031221 | 0        | Unclassified | chr1:78811523-78816600    | 3.078   |
| Gprasp1       | 0 | 0 | 0 | 244  | 4.066667  | 4.23654  | 31.43379 | Stalled      | chrX:132275230-132338007  | 60.778  |
| Rab3c         | 0 | 0 | 0 | 136  | 2.266667  | 0.042228 | 0        | Unclassified | chr13:110844396-111072414 | 226.019 |
| Ccdc137       | 0 | 0 | 0 | 437  | 7.283333  | 7.2724   | 10.14144 | Unclassified | chr11:120317442-120325667 | 6.226   |
| V1ri7         | 0 | 0 | 0 | 0    | 0         | 0.049331 | 0        | Unclassified | chr13:22593205-22596114   | 0.91    |
| V1ri9         | 0 | 0 | 0 | 1    | 0.016667  | 0.02001  | 0        | Unclassified | chr13:22310729-22313689   | 0.961   |
| Vmn2r43       | 0 | 0 | 0 | 1    | 0.016667  | 0        | 0        | Unclassified | chr7:9864726-9882971      | 16.246  |
| Gpr39         | 0 | 0 | 0 | 181  | 3.016667  | 0.018006 | 1.050595 | Unclassified | chr1:127571572-127770436  | 196.865 |
| V1rh7         | 0 | 0 | 0 | 0    | 0         | 0        | 0        | Unclassified | chr13:22711965-22714904   | 0.94    |
| V1rh8         | 0 | 0 | 0 | 0    | 0         | 0        | 0        | Unclassified | chr13:22683848-22686799   | 0.952   |
| V1rh9         | 0 | 0 | 0 | 0    | 0         | 0.027586 | 0        | Unclassified | chr13:22864267-22867194   | 0.928   |
| V1ri2         | 0 | 0 | 0 | 2    | 0.033333  | 0        | 2        | Unclassified | chr13:23165660-23168563   | 0.904   |
| V1ri3         | 0 | 0 | 0 | 1    | 0.016667  | 0        | 0        | Unclassified | chr13:22444214-22447117   | 0.904   |



|               |   |   |   |      |          |          |          |              |                           |         |
|---------------|---|---|---|------|----------|----------|----------|--------------|---------------------------|---------|
| Enpp7         | 0 | 0 | 0 | 5    | 0.083333 | 0.11226  | 0.477466 | Unclassified | chr11:118847501-118854155 | 4.655   |
| V1ri5         | 0 | 0 | 0 | 2    | 0.033333 | 0.024354 | 1        | Unclassified | chr13:23226353-23229250   | 0.898   |
| V1ri6         | 0 | 0 | 0 | 1    | 0.016667 | 0.016249 | 0        | Unclassified | chr13:22368185-22371273   | 1.089   |
| MsrB2         | 0 | 0 | 0 | 307  | 5.116667 | 5.44903  | 6.897809 | Unclassified | chr2:19291262-19316597    | 23.336  |
| 1700001C02Rik | 0 | 0 | 0 | 24   | 0.4      | 0.036001 | 0        | Unclassified | chr5:30766449-30786460    | 18.012  |
| 2610019F03Rik | 0 | 0 | 0 | 22   | 0.366667 | 0.041628 | 1.684584 | Unclassified | chr8:13952007-13976777    | 22.771  |
| Gm5089        | 0 | 0 | 0 | 15   | 0.25     | 0.107373 | 0.58116  | Unclassified | chr14:122834075-122852337 | 16.263  |
| Wdfy3         | 0 | 0 | 0 | 303  | 5.05     | 0.134647 | 2.666466 | Unclassified | chr5:102261973-102500940  | 236.968 |
| Rtp1          | 0 | 0 | 0 | 5    | 0.083333 | 0.053401 | 0        | Unclassified | chr16:23427205-23434033   | 4.829   |
| Ccdc123       | 0 | 0 | 0 | 586  | 9.766667 | 6.14008  | 12.71431 | Unclassified | chr7:36180111-36223703    | 41.593  |
| Hsp90aa1      | 0 | 0 | 0 | 590  | 9.833333 | 41.8085  | 16.90294 | Unclassified | chr12:111929245-111936605 | 5.361   |
| Hspa1b        | 0 | 0 | 0 | 49   | 0.816667 | 2.02339  | 13.08931 | Stalled      | chr17:35093373-35098183   | 2.811   |
| Rpap2         | 0 | 0 | 0 | 813  | 13.55    | 0        | 34.10382 | Unclassified | chr5:108024735-108090857  | 64.123  |
| Cd3e          | 0 | 0 | 0 | 14   | 0.233333 | 0.23205  | 0.450776 | Unclassified | chr9:44806825-44819673    | 10.849  |
| Cep170        | 0 | 0 | 0 | 226  | 3.766667 | 3.0083   | 0.994576 | Unclassified | chr1:178663783-178739255  | 73.473  |
| Agxt2l1       | 0 | 0 | 0 | 23   | 0.383333 | 0.067683 | 0.438417 | Unclassified | chr3:130318492-130338666  | 18.175  |
| Gm13889       | 0 | 0 | 0 | 7    | 0.116667 | 0.69546  | 5        | Unclassified | chr2:93795967-93799257    | 1.291   |
| A530064D06Rik | 0 | 0 | 0 | 14   | 0.233333 | 0.048485 | 0.544817 | Unclassified | chr17:48288845-48306207   | 15.363  |
| BC094916      | 0 | 0 | 0 | 26   | 0.433333 | 6.22713  | 1.575618 | Unclassified | chr1:175451441-175468088  | 14.648  |
| Gm5114        | 0 | 0 | 0 | 2    | 0.033333 | 0.018177 | 1        | Unclassified | chr7:46662663-46670530    | 5.868   |
| 8430410K20Rik | 0 | 0 | 0 | 28   | 0.466667 | 4.61654  | 1.211838 | Unclassified | chr9:4381536-4386869      | 3.334   |
| Tmem60        | 0 | 0 | 0 | 331  | 5.516667 | 8.70994  | 13.22676 | Unclassified | chr5:20386270-20392688    | 4.419   |
| Eml4          | 0 | 0 | 0 | 2420 | 40.33333 | 19.5401  | 15.3165  | Unclassified | chr17:83748270-83879699   | 129.43  |
| Cnrm3         | 0 | 0 | 0 | 165  | 2.75     | 4.12847  | 9.915094 | Unclassified | chr1:36566720-36585082    | 16.363  |
| Zcchc4        | 0 | 0 | 0 | 468  | 7.8      | 4.05617  | 8.143488 | Unclassified | chr5:53172305-53211004    | 36.7    |
| Olfir790      | 0 | 0 | 0 | 1    | 0.016667 | 0        | 1        | Unclassified | chr10:128935941-128938910 | 0.97    |
| Zfp593        | 0 | 0 | 0 | 292  | 4.866667 | 15.3565  | 2.058409 | Elongating   | chr4:133799220-133803506  | 2.287   |
| Fam70a        | 0 | 0 | 0 | 98   | 1.633333 | 0.205482 | 1.119602 | Unclassified | chrX:35550477-35607658    | 55.182  |
| Pcdh7         | 0 | 0 | 0 | 201  | 3.35     | 0.198201 | 0.680512 | Unclassified | chr5:58107259-58523479    | 414.221 |
| 2210023G05Rik | 0 | 0 | 0 | 2    | 0.033333 | 0.180403 | 0        | Unclassified | chr8:107483617-107493436  | 7.82    |
| Olfir63       | 0 | 0 | 0 | 3    | 0.05     | 0        | 1        | Unclassified | chr17:33403670-33406621   | 0.952   |
| Nat5          | 0 | 0 | 0 | 419  | 6.983333 | 11.8701  | 8.133685 | Unclassified | chr2:145726976-145742160  | 13.185  |
| Rprm          | 0 | 0 | 0 | 5    | 0.083333 | 0.737378 | 3        | Unclassified | chr2:53936503-53939963    | 1.461   |
| Tmem33        | 0 | 0 | 0 | 422  | 7.033333 | 3.51099  | 25.09742 | Unclassified | chr5:67649890-67682700    | 30.811  |
| PlekHg4       | 0 | 0 | 0 | 23   | 0.383333 | 0.119951 | 1.573257 | Unclassified | chr8:107897280-107906762  | 7.483   |
| Defb2         | 0 | 0 | 0 | 6    | 0.1      | 0        | 0        | Unclassified | chr8:22948397-22953953    | 3.557   |
| Jhdm1d        | 0 | 0 | 0 | 429  | 7.15     | 1.35462  | 29.92491 | Stalled      | chr6:39086618-39158772    | 70.155  |
| Ccr5          | 0 | 0 | 0 | 45   | 0.75     | 0        | 1.241841 | Unclassified | chr9:124034281-124041922  | 5.642   |
| Fa2h          | 0 | 0 | 0 | 96   | 1.6      | 0.236577 | 2.108634 | Unclassified | chr8:113869037-113919721  | 48.685  |
| 4933404M02Rik | 0 | 0 | 0 | 21   | 0.35     | 1.53863  | 1.938981 | Unclassified | chr2:70344875-70378941    | 32.067  |
| Ktelc1        | 0 | 0 | 0 | 493  | 8.216667 | 5.33245  | 12.00186 | Unclassified | chr16:38525263-38552266   | 25.004  |
| 1700029F12Rik | 0 | 0 | 0 | 7    | 0.116667 | 0.034059 | 0        | Unclassified | chr13:97791818-97806317   | 12.5    |
| Adra1d        | 0 | 0 | 0 | 35   | 0.583333 | 1.02773  | 0.709103 | Unclassified | chr2:131371092-131390021  | 16.93   |
| Cib4          | 0 | 0 | 0 | 84   | 1.4      | 0        | 1.276531 | Unclassified | chr5:30787956-30850209    | 60.254  |
| Baz1a         | 0 | 0 | 0 | 2292 | 38.2     | 14.9471  | 8.66894  | Unclassified | chr12:55993975-56089323   | 93.349  |
| Ldoc1         | 0 | 0 | 0 | 0    | 0        | 0.076535 | 0        | Unclassified | chrX:58960790-58964125    | 1.336   |
| Trb1          | 0 | 0 | 0 | 13   | 0.216667 | 0.028898 | 0.280115 | Unclassified | chr8:114210409-114216910  | 4.502   |
| Gm5505        | 0 | 0 | 0 | 2    | 0.033333 | 0        | 0        | Unclassified | chr18:44185522-44191862   | 4.341   |
| Cox6b1        | 0 | 0 | 0 | 346  | 5.766667 | 173.294  | 5.33128  | Unclassified | chr7:31401992-31413170    | 9.179   |
| Cypt2         | 0 | 0 | 0 | 0    | 0        | 0        | 0        | Unclassified | chrX:102693110-102695974  | 0.865   |
| Acy1          | 0 | 0 | 0 | 723  | 12.05    | 7.53988  | 8.00086  | Unclassified | chr9:106335326-106342567  | 5.242   |
| Mapk3         | 0 | 0 | 0 | 94   | 1.566667 | 10.4383  | 4.056884 | Unclassified | chr7:133901139-133909330  | 6.192   |
| Mapk10        | 0 | 0 | 0 | 212  | 3.533333 | 0.117516 | 1.773925 | Unclassified | chr5:10336966-103642353   | 303.388 |
| Mapk13        | 0 | 0 | 0 | 24   | 0.4      | 0.221351 | 1.498772 | Unclassified | chr17:28904261-28915649   | 9.389   |
| Olfir1306     | 0 | 0 | 0 | 0    | 0        | 0.034074 | 0        | Unclassified | chr2:111752146-111755085  | 0.94    |
| Mapk8         | 0 | 0 | 0 | 337  | 5.616667 | 1.89688  | 29.47136 | Stalled      | chr14:34191083-34262344   | 69.262  |
| Ceacam5       | 0 | 0 | 0 | 19   | 0.316667 | 0.003937 | 0        | Unclassified | chr7:18296600-18346470    | 47.871  |
| Zfp592        | 0 | 0 | 0 | 843  | 14.05    | 6.53002  | 15.92081 | Unclassified | chr7:88136569-88190048    | 51.48   |
| Pla2g4c       | 0 | 0 | 0 | 45   | 0.75     | 0.326534 | 1.294195 | Unclassified | chr7:13912670-13946017    | 31.348  |
| L3mbt4        | 0 | 0 | 0 | 299  | 4.983333 | 0.123396 | 0.629026 | Unclassified | chr17:68621136-69129426   | 506.291 |
| Rbm8a         | 0 | 0 | 0 | 291  | 4.85     | 25.2836  | 9.265088 | Unclassified | chr3:96431850-96437714    | 3.865   |
| F10           | 0 | 0 | 0 | 25   | 0.416667 | 0.301118 | 0.43779  | Unclassified | chr8:13035307-13056216    | 18.91   |
| Sic17a5       | 0 | 0 | 0 | 424  | 7.066667 | 2.74197  | 31.74278 | Stalled      | chr9:78384315-78437834    | 51.52   |
| Atp1b3        | 0 | 0 | 0 | 834  | 13.9     | 48.4011  | 16.03657 | Unclassified | chr9:96233094-96266718    | 31.625  |
| Oxsr1         | 0 | 0 | 0 | 608  | 10.13333 | 8.11908  | 0.970294 | Unclassified | chr9:119149783-119215966  | 64.184  |
| Klhl25        | 0 | 0 | 0 | 398  | 6.633333 | 6.22886  | 7.27868  | Unclassified | chr7:82991223-83019016    | 25.794  |
| Hepacam2      | 0 | 0 | 0 | 32   | 0.533333 | 0.601522 | 2.296825 | Unclassified | chr6:3407088-3446498      | 37.411  |
| Cadm1         | 0 | 0 | 0 | 266  | 4.433333 | 0.10509  | 5.049021 | Unclassified | chr9:47336434-47661468    | 323.035 |
| Rbm46         | 0 | 0 | 0 | 22   | 0.366667 | 0.021504 | 3.461566 | Unclassified | chr3:82641155-82682405    | 39.251  |
| Galp          | 0 | 0 | 0 | 19   | 0.316667 | 0        | 0        | Unclassified | chr7:6146691-6167739      | 19.049  |
| B3gat1        | 0 | 0 | 0 | 16   | 0.266667 | 0.018705 | 1.267398 | Unclassified | chr9:26557146-26568923    | 9.778   |
| Tro           | 0 | 0 | 0 | 36   | 0.6      | 0.020578 | 0.504588 | Unclassified | chrX:147079845-147093979  | 12.135  |
| Plek          | 0 | 0 | 0 | 505  | 8.416667 | 12.6546  | 9.969955 | Unclassified | chr11:16871208-16910721   | 37.514  |
| Prpf40a       | 0 | 0 | 0 | 1250 | 20.83333 | 16.2019  | 32.32567 | Unclassified | chr2:52997508-53052221    | 52.714  |
| Tbpb2         | 0 | 0 | 0 | 703  | 11.71667 | 1.79793  | 14.68016 | Unclassified | chr3:119421659-119488306  | 64.648  |
| Zp3r          | 0 | 0 | 0 | 34   | 0.566667 | 0.031505 | 1.252129 | Unclassified | chr1:132473282-132528183  | 52.902  |
| Gucy1b2       | 0 | 0 | 0 | 76   | 1.266667 | 0.05673  | 0.916664 | Unclassified | chr14:63011512-63077126   | 63.615  |
| Ikzf4         | 0 | 0 | 0 | 97   | 1.616667 | 0.339999 | 3.546703 | Unclassified | chr10:128069470-128085049 | 13.58   |
| Bmp3          | 0 | 0 | 0 | 23   | 0.383333 | 0.061775 | 0.573254 | Unclassified | chr5:99281457-99309979    | 26.523  |
| Pltp          | 0 | 0 | 0 | 357  | 5.95     | 0        | 2.629711 | Elongating   | chr2:164665017-164685208  | 18.192  |
| Grem2         | 0 | 0 | 0 | 53   | 0.883333 | 0.006845 | 0        | Unclassified | chr1:176763915-176853950  | 88.036  |
| Actr1         | 0 | 0 | 0 | 1    | 0.016667 | 0.028715 | 0        | Unclassified | chrX:43680183-43683522    | 1.34    |
| Gm13128       | 0 | 0 | 0 | 1    | 0.016667 | 0.032972 | 0        | Unclassified | chr4:143918151-143923368  | 3.218   |
| Pappa2        | 0 | 0 | 0 | 188  | 3.133333 | 0.046279 | 0.568154 | Unclassified | chr1:160641861-160889569  | 245.709 |
| Arl1          | 0 | 0 | 0 | 359  | 5.983333 | 20.1044  | 23.44115 | Unclassified | chr10:88192158-88205947   | 11.79   |
| Olfir1133     | 0 | 0 | 0 | 0    | 0        | 0        | 0        | Unclassified | chr2:87485337-87488278    | 0.942   |

|               |   |          |   |      |          |          |          |              |                           |         |
|---------------|---|----------|---|------|----------|----------|----------|--------------|---------------------------|---------|
| Add2          | 0 | 0        | 0 | 46   | 0.766667 | 0.090401 | 0        | Unclassified | chr6:86026077-86069549    | 41.473  |
| A530098C11Rik | 0 | 0        | 0 | 169  | 2.816667 | 0.035404 | 0.226415 | Unclassified | chr1:44066252-44078851    | 10.6    |
| Olfr397       | 0 | 0        | 0 | 1    | 0.016667 | 0.013519 | 0        | Unclassified | chr11:73776111-73779059   | 0.949   |
| Adcyap1r1     | 0 | 0        | 0 | 70   | 1.166667 | 0.024971 | 0        | Unclassified | chr6:55399973-55451449    | 49.477  |
| Adcyap1       | 0 | 0        | 0 | 9    | 0.15     | 0.110274 | 0.915891 | Unclassified | chr17:93596761-93604829   | 6.069   |
| Olfr1123      | 0 | 0        | 0 | 0    | 0        | 0        | 0        | Unclassified | chr2:87256206-87259178    | 0.973   |
| Olfr390       | 0 | 0        | 0 | 0    | 0        | 0.057587 | 0        | Unclassified | chr11:73598441-73601377   | 0.937   |
| Adcy6         | 0 | 0        | 0 | 30   | 0.5      | 0.298442 | 0        | Unclassified | chr15:98420420-98440064   | 17.645  |
| Inca1         | 0 | 0        | 0 | 312  | 5.2      | 3.51362  | 53.76753 | Stalled      | chr11:70501862-70515657   | 11.796  |
| Fam26e        | 0 | 0        | 0 | 7    | 0.116667 | 0.157872 | 2.027395 | Unclassified | chr10:33811157-33818325   | 5.169   |
| Echdc2        | 0 | 0        | 0 | 25   | 0.416667 | 1.184    | 3.349141 | Unclassified | chr4:107836070-107851912  | 13.843  |
| Ikbkg         | 0 | 0        | 0 | 463  | 7.716667 | 3.8537   | 19.11451 | Stalled      | chrX:71673019-71699117    | 24.099  |
| Rcn1          | 0 | 0        | 0 | 242  | 4.033333 | 4.9389   | 9.015939 | Unclassified | chr2:105226104-105241476  | 13.373  |
| Gm6583        | 0 | 0        | 0 | 24   | 0.4      | 0        | 1.53525  | Unclassified | chr5:112782820-112787053  | 2.234   |
| Rcvrn         | 0 | 0        | 0 | 17   | 0.283333 | 0.036204 | 1.559758 | Unclassified | chr11:67506827-67516857   | 8.031   |
| Il11          | 0 | 0        | 0 | 16   | 0.266667 | 0.071089 | 0.624169 | Unclassified | chr7:4724661-4731743      | 5.083   |
| Il11ra1       | 0 | 0        | 0 | 16   | 0.266667 | 0.618972 | 4.24545  | Unclassified | chr4:41707182-41716346    | 7.165   |
| Gm11565       | 0 | 0        | 0 | 4    | 0.066667 | 0        | 1        | Unclassified | chr11:99774064-99776985   | 0.922   |
| Fads3         | 0 | 0        | 0 | 288  | 4.8      | 2.8224   | 1.699127 | Elongating   | chr19:10114037-10134161   | 18.125  |
| Gm13157       | 0 | 0        | 0 | 298  | 4.966667 | 2.00987  | 15.05325 | Stalled      | chr4:147128083-147185895  | 55.813  |
| Sic6a14       | 0 | 0        | 0 | 5    | 0.083333 | 0.014946 | 0        | Unclassified | chrX:21290025-21319481    | 27.457  |
| Mc4r          | 0 | 0        | 0 | 5    | 0.083333 | 0.092575 | 1.276934 | Unclassified | chr18:67017361-67022126   | 2.766   |
| Mc3r          | 0 | 0        | 0 | 5    | 0.083333 | 0.06352  | 0.896247 | Unclassified | chr2:172071991-172076614  | 2.624   |
| Mc2r          | 0 | 0        | 0 | 9    | 0.15     | 0        | 0        | Unclassified | chr18:68566560-68590913   | 22.354  |
| Asb9          | 0 | 0        | 0 | 10   | 0.166667 | 0.045132 | 0.819462 | Unclassified | chrX:160933834-160977684  | 41.851  |
| Trim9         | 0 | 0        | 0 | 118  | 1.966667 | 0.469627 | 3.905854 | Unclassified | chr12:71345523-71450601   | 103.079 |
| Col1a2        | 0 | 0        | 0 | 27   | 0.45     | 0.064792 | 0        | Unclassified | chr6:4453696-4491543      | 35.848  |
| Acmds         | 0 | 0        | 0 | 42   | 0.7      | 0.044521 | 1.977459 | Unclassified | chr1:129623989-129664141  | 38.153  |
| Pmpca         | 0 | 0        | 0 | 656  | 10.93333 | 23.4855  | 7.929876 | Unclassified | chr2:26242867-26252641    | 7.775   |
| Olig2         | 0 | 0        | 0 | 7    | 0.116667 | 0.152513 | 0.515621 | Unclassified | chr16:91223794-91228922   | 3.129   |
| Oog3          | 0 | 0        | 0 | 5    | 0.083333 | 0        | 0.505929 | Unclassified | chr4:143747459-143754554  | 5.096   |
| Adrb3         | 0 | 0        | 0 | 10   | 0.166667 | 0.270541 | 0.260218 | Unclassified | chr8:28336247-28342060    | 3.814   |
| Arhgef12      | 0 | 0        | 0 | 658  | 10.96667 | 3.97244  | 30.41266 | Stalled      | chr9:42771924-42915801    | 141.878 |
| Procr         | 0 | 0        | 0 | 16   | 0.266667 | 0.843715 | 1.330126 | Unclassified | chr2:155574952-155581213  | 4.262   |
| Olfr1286      | 0 | 0        | 0 | 0    | 0        | 0        | 0        | Unclassified | chr2:111260188-111263106  | 0.919   |
| Nxph2         | 0 | 0        | 0 | 27   | 0.45     | 0.029817 | 0        | Unclassified | chr2:23174765-23257493    | 80.729  |
| Clec14a       | 0 | 0        | 0 | 6    | 0.1      | 0.019765 | 0.469496 | Unclassified | chr12:59365706-59372245   | 4.54    |
| Nxph1         | 0 | 0        | 0 | 174  | 2.9      | 0.079069 | 1.281042 | Unclassified | chr6:8898018-9198578      | 298.561 |
| Tmem92        | 0 | 0        | 0 | 5    | 0.083333 | 0.065602 | 0.599359 | Unclassified | chr11:94638530-94646017   | 5.488   |
| 1810022C23Rik | 0 | 0        | 0 | 16   | 0.266667 | 0.833692 | 2.473108 | Unclassified | chr13:35038482-35057678   | 17.197  |
| Chrd12        | 0 | 0        | 0 | 68   | 1.133333 | 0.09275  | 0.598397 | Unclassified | chr7:107152913-107183236  | 28.324  |
| Nxn           | 0 | 0        | 0 | 621  | 10.35    | 6.41221  | 11.77833 | Stalled      | chr11:76070727-76214643   | 141.917 |
| Ccdc112       | 0 | 0        | 0 | 84   | 1.4      | 1.19424  | 13.49385 | Stalled      | chr18:46441804-46473582   | 29.779  |
| Fem1c         | 0 | 0        | 0 | 888  | 14.8     | 11.5469  | 28.41756 | Unclassified | chr18:46664259-46687625   | 21.367  |
| Mafa          | 0 | 0        | 0 | 35   | 0.583333 | 0.534014 | 20       | Unclassified | chr15:75577272-75580352   | 1.081   |
| Pramef8       | 0 | 0        | 0 | 227  | 3.783333 | 3.33781  | 1.386843 | Elongating   | chr4:143000328-143010990  | 8.663   |
| Ltm2          | 0 | 0        | 0 | 443  | 7.383333 | 3.28308  | 104.6208 | Stalled      | chr8:26688961-26709959    | 18.999  |
| Dnajc24       | 0 | 0        | 0 | 275  | 4.583333 | 16.1333  | 16.73576 | Stalled      | chr2:105806873-105845706  | 36.834  |
| Gm2030        | 0 | 0        | 0 | 0    | 0        | 0        | 0        | Unclassified | chrX:25714102-25739170    | 23.069  |
| S1pr5         | 0 | 0        | 0 | 22   | 0.366667 | 0.97585  | 0.630992 | Unclassified | chr9:21047360-21054887    | 5.528   |
| Olfr1128      | 0 | 0        | 0 | 0    | 0        | 0.027385 | 0        | Unclassified | chr2:87384764-87387699    | 0.936   |
| Mrps35        | 0 | 0        | 0 | 474  | 7.9      | 18.0153  | 18.38758 | Unclassified | chr6:146989291-147019424  | 28.134  |
| Gm5082        | 0 | 0        | 0 | 17   | 0.283333 | 0.024106 | 0.691099 | Unclassified | chr13:41742811-41752146   | 7.336   |
| Trim1         | 0 | 0        | 0 | 9    | 0.15     | 0.020783 | 0.571757 | Unclassified | chr8:44215160-44228840    | 11.681  |
| Pi15          | 0 | 0        | 0 | 17   | 0.283333 | 0.02407  | 0.636686 | Unclassified | chr1:17589981-17621019    | 29.039  |
| Smchd1        | 0 | 0        | 0 | 2074 | 34.56667 | 12.3339  | 24.25434 | Unclassified | chr17:171693833-171826683 | 130.851 |
| Olfr828       | 0 | 0        | 0 | 1    | 0.016667 | 0.027298 | 1        | Unclassified | chr9:18619797-18622736    | 0.94    |
| Dennd2c       | 0 | 0        | 0 | 72   | 1.2      | 0.11595  | 0.373746 | Unclassified | chr3:102929478-102973656  | 42.179  |
| Ddx11         | 0 | 0        | 0 | 489  | 8.15     | 4.8141   | 15.96611 | Unclassified | chr17:66470859-66501508   | 28.65   |
| Tmem91        | 0 | 0        | 0 | 196  | 3.266667 | 0.801949 | 0.505334 | Unclassified | chr7:26454160-26462185    | 6.026   |
| Sec14I3       | 0 | 0        | 0 | 10   | 0.166667 | 0.040973 | 1.212377 | Unclassified | chr11:3962843-3976617     | 11.775  |
| Nefh          | 0 | 0        | 0 | 74   | 1.233333 | 2.13503  | 1.650629 | Unclassified | chr11:4838758-4850067     | 9.31    |
| Cnrip1        | 0 | 0        | 0 | 60   | 1        | 4.12961  | 18.34655 | Stalled      | chr11:16949936-16979375   | 27.44   |
| Sic7a15       | 0 | 0        | 0 | 52   | 0.866667 | 0.067485 | 1.173589 | Unclassified | chr12:8535288-8607872     | 70.585  |
| Colec12       | 0 | 0        | 0 | 99   | 1.65     | 0.050154 | 0.635816 | Unclassified | chr18:9705645-9877993     | 170.349 |
| Gm7173        | 0 | 0        | 0 | 12   | 0.2      | 0.018102 | 0.771266 | Unclassified | chrX:76727906-76764624    | 34.719  |
| Olfr627       | 0 | 0        | 0 | 2    | 0.033333 | 0.033644 | 2        | Unclassified | chr7:110863109-110866060  | 0.952   |
| Trem1         | 0 | 0        | 0 | 12   | 0.2      | 0.115557 | 0.767866 | Unclassified | chr17:48497240-48506471   | 7.232   |
| Olfr1121      | 0 | 0        | 0 | 1    | 0.016667 | 0        | 0        | Unclassified | chr2:87209690-87212635    | 0.946   |
| Gigyf2        | 0 | 0        | 0 | 950  | 15.83333 | 13.8939  | 34.14799 | Unclassified | chr1:89221572-89347385    | 123.814 |
| Dctd          | 0 | 0        | 0 | 513  | 8.55     | 6.32221  | 15.97581 | Unclassified | chr8:49193311-49227020    | 31.71   |
| Prkci         | 0 | 0        | 0 | 418  | 6.966667 | 4.79524  | 24.21536 | Stalled      | chr3:30892692-30951662    | 56.971  |
| Car5a         | 0 | 0        | 0 | 85   | 1.416667 | 0.052472 | 1.300459 | Unclassified | chr8:124440043-124470812  | 28.77   |
| Car6          | 0 | 0        | 0 | 22   | 0.366667 | 0.056171 | 0        | Unclassified | chr4:149561124-149577244  | 14.121  |
| Car4          | 0 | 0        | 0 | 16   | 0.266667 | 0.157982 | 1.595628 | Unclassified | chr11:84769255-84779554   | 8.3     |
| Trafid1       | 0 | 0        | 0 | 573  | 9.55     | 28.5577  | 4.705993 | Unclassified | chr5:121821734-121837624  | 13.891  |
| Nr1i3         | 0 | 0        | 0 | 58   | 0.966667 | 0.05084  | 0.366518 | Unclassified | chr1:173142100-173148975  | 4.876   |
| 4931429I11Rik | 0 | 0        | 0 | 56   | 0.933333 | 0.075194 | 1.688822 | Unclassified | chr9:40702931-40774195    | 69.265  |
| D11Wsu99e     | 0 | 0        | 0 | 898  | 14.96667 | 12.9007  | 13.60173 | Unclassified | chr11:113522632-113547465 | 22.834  |
| Gm5460        | 0 | 0        | 0 | 7    | 0.116667 | 0.047144 | 2.131064 | Unclassified | chr14:34852263-34860167   | 5.905   |
| Atp5o         | 0 | 0        | 0 | 295  | 4.916667 | 95.1516  | 5.991847 | Unclassified | chr16:91925467-91933875   | 6.409   |
| Raly1         | 0 | 0        | 0 | 264  | 4.4      | 0.127055 | 0.730351 | Unclassified | chr3:13469654-14182287    | 710.634 |
| Wdfy1         | 0 | 0        | 0 | 734  | 12.23333 | 11.7935  | 9.33593  | Unclassified | chr1:79698836-79760344    | 59.509  |
| Fam171a2      | 0 | 0        | 0 | 159  | 2.65     | 0.699148 | 0.491264 | Unclassified | chr11:102298295-102310977 | 10.683  |
| Gm16387       | 0 | 165.6498 | 0 | 12   | 0.2      | 0.019052 | 0.868778 | Unclassified | chr7:46511993-46521904    | 7.912   |
| Drap1         | 0 | 0        | 0 | 296  | 4.933333 | 91.4198  | 3.647131 | Unclassified | chr19:5422823-5426916     | 2.094   |

|               |   |   |   |      |          |          |          |              |                           |         |
|---------------|---|---|---|------|----------|----------|----------|--------------|---------------------------|---------|
| Gpihbp1       | 0 | 0 | 0 | 2    | 0.033333 | 0.064323 | 0        | Unclassified | chr15:75425087-75428643   | 1.557   |
| Gm11330       | 0 | 0 | 0 | 0    | 0        | 0        | 0        | Unclassified | chr13:23339106-23342192   | 1.087   |
| Ppp1r14a      | 0 | 0 | 0 | 17   | 0.283333 | 0.627541 | 3.475113 | Unclassified | chr7:30072338-30078409    | 4.072   |
| Cenpa         | 0 | 0 | 0 | 562  | 9.366667 | 47.5167  | 8.020529 | Unclassified | chr5:30967274-30977199    | 7.926   |
| Taf10         | 0 | 0 | 0 | 380  | 6.333333 | 58.9894  | 3.632698 | Unclassified | chr7:112891407-112894852  | 1.446   |
| Syp           | 0 | 0 | 0 | 163  | 2.716667 | 1.49661  | 0.316844 | Unclassified | chrX:7213705-7230382      | 14.678  |
| Lct           | 0 | 0 | 0 | 372  | 6.2      | 0.068592 | 12.40626 | Stalled      | chr1:130181340-130226895  | 43.556  |
| Syngnr3       | 0 | 0 | 0 | 64   | 1.066667 | 1.59613  | 0.35172  | Unclassified | chr17:24822036-24828894   | 4.859   |
| Syngnr1       | 0 | 0 | 0 | 90   | 1.5      | 1.32037  | 5.650262 | Unclassified | chr15:79919763-79949931   | 28.169  |
| Slc35a1       | 0 | 0 | 0 | 293  | 4.883333 | 3.43439  | 21.58367 | Stalled      | chr4:34610506-34636687    | 24.182  |
| Bcas2         | 0 | 0 | 0 | 246  | 4.1      | 38.5072  | 14.80415 | Unclassified | chr3:102973633-102983077  | 7.445   |
| Hyi           | 0 | 0 | 0 | 190  | 3.166667 | 5.4104   | 2.295014 | Elongating   | chr4:118030618-118035349  | 2.732   |
| Spry1         | 0 | 0 | 0 | 16   | 0.266667 | 0.468388 | 1.731563 | Unclassified | chr3:37536871-37543521    | 4.651   |
| Syt1          | 0 | 0 | 0 | 292  | 4.866667 | 0.013577 | 0        | Unclassified | chr10:107935313-108449675 | 512.363 |
| Chchd8        | 0 | 0 | 0 | 230  | 3.833333 | 10.2474  | 11.93397 | Stalled      | chr7:107683613-107688326  | 2.714   |
| Galnt13       | 0 | 0 | 0 | 231  | 3.85     | 0.027598 | 0        | Unclassified | chr2:54286797-54970155    | 681.359 |
| Tmem28        | 0 | 0 | 0 | 14   | 0.233333 | 0.063358 | 0        | Unclassified | chrX:97014407-97041684    | 25.278  |
| Ulk2          | 0 | 0 | 0 | 554  | 9.233333 | 2.45771  | 97.61637 | Stalled      | chr11:61589099-61670594   | 79.496  |
| Cabp2         | 0 | 0 | 0 | 14   | 0.233333 | 0.131232 | 0        | Unclassified | chr19:4081518-4087337     | 3.82    |
| Rnf11         | 0 | 0 | 0 | 188  | 3.133333 | 6.43054  | 33.30484 | Stalled      | chr4:109125461-109151110  | 23.65   |
| Cabp5         | 0 | 0 | 0 | 11   | 0.183333 | 0.09548  | 0.54866  | Unclassified | chr7:13981503-13994227    | 10.725  |
| Pde7b         | 0 | 0 | 0 | 1050 | 17.5     | 1.37254  | 11.83842 | Stalled      | chr10:20117809-20446874   | 327.066 |
| Dpf1          | 0 | 0 | 0 | 92   | 1.533333 | 0.496257 | 1.373945 | Unclassified | chr7:30087023-30102605    | 13.583  |
| Gdpd2         | 0 | 0 | 0 | 48   | 0.8      | 0.083961 | 8.560117 | Unclassified | chrX:97923185-97934238    | 9.054   |
| Pdia6         | 0 | 0 | 0 | 1126 | 18.76667 | 223.184  | 5.656641 | Unclassified | chr12:17271400-17291576   | 18.177  |
| 9130008F23Rik | 0 | 0 | 0 | 19   | 0.316667 | 3.02105  | 4.855725 | Unclassified | chr17:41012430-41019507   | 5.078   |
| Zfp846        | 0 | 0 | 0 | 146  | 2.433333 | 1.96372  | 20.81636 | Stalled      | chr9:20383771-20399637    | 13.867  |
| Wdr53         | 0 | 0 | 0 | 355  | 5.916667 | 12.9734  | 25.63567 | Stalled      | chr16:32245371-32257158   | 9.788   |
| Cdkl3         | 0 | 0 | 0 | 416  | 6.933333 | 4.67528  | 48.56734 | Stalled      | chr11:51815722-51815667   | 33.946  |
| Mett5d1       | 0 | 0 | 0 | 242  | 4.033333 | 1.34873  | 30.91857 | Stalled      | chr2:108932456-109120447  | 185.992 |
| Slc12a1       | 0 | 0 | 0 | 70   | 1.166667 | 0.016559 | 0.525457 | Unclassified | chr2:124976335-125055737  | 77.403  |
| Krt42         | 0 | 0 | 0 | 16   | 0.266667 | 0        | 2.569223 | Unclassified | chr11:100124195-100133185 | 6.991   |
| Smc3          | 0 | 0 | 0 | 1083 | 18.05    | 18.4221  | 28.65427 | Unclassified | chr19:53672885-53720321   | 45.437  |
| Csnk2a2       | 0 | 0 | 0 | 863  | 14.38333 | 6.85615  | 5.551183 | Unclassified | chr8:97969995-98014720    | 42.726  |
| Csrp3         | 0 | 0 | 0 | 20   | 0.333333 | 0.057025 | 0        | Unclassified | chr7:56085767-56101021    | 13.255  |
| Csrp2         | 0 | 0 | 0 | 239  | 3.983333 | 5.1315   | 14.71548 | Unclassified | chr10:110355231-110376570 | 19.34   |
| Olfr435       | 0 | 0 | 0 | 0    | 0        | 0.054422 | 0        | Unclassified | chr6:43149644-43152586    | 0.943   |
| 1700094C09Rik | 0 | 0 | 0 | 33   | 0.55     | 0.067366 | 0.462654 | Unclassified | chr8:12571048-12600738    | 27.691  |
| Olfr1403      | 0 | 0 | 0 | 0    | 0        | 0.038837 | 0        | Unclassified | chr1:175198277-175201267  | 0.991   |
| Tlk1          | 0 | 0 | 0 | 1695 | 28.25    | 7.88788  | 20.56197 | Unclassified | chr2:70550466-70665537    | 113.072 |
| Olfr1160      | 0 | 0 | 0 | 0    | 0        | 0        | 0        | Unclassified | chr2:87845973-87848933    | 0.961   |
| Olfr6         | 0 | 0 | 0 | 0    | 0        | 0        | 0        | Unclassified | chr7:114099499-114102448  | 0.95    |
| Olfr1154      | 0 | 0 | 0 | 0    | 0        | 0        | 0        | Unclassified | chr2:87742898-87745831    | 0.934   |
| Ghnr          | 0 | 0 | 0 | 8    | 0.133333 | 0.049149 | 0.447121 | Unclassified | chr3:27268272-27276932    | 6.661   |
| Gm5150        | 0 | 0 | 0 | 16   | 0.266667 | 0.04208  | 0        | Unclassified | chr3:15848069-15908332    | 58.264  |
| Gm12695       | 0 | 0 | 0 | 32   | 0.533333 | 0.039122 | 0        | Unclassified | chr4:96390577-96453851    | 61.275  |
| Ascc3         | 0 | 0 | 0 | 1199 | 19.98333 | 2.91154  | 76.75925 | Stalled      | chr10:50310474-50571007   | 258.534 |
| Olfr441       | 0 | 0 | 0 | 0    | 0        | 0.030299 | 0        | Unclassified | chr6:43063742-43066675    | 0.934   |
| Olfr438       | 0 | 0 | 0 | 0    | 0        | 0.016562 | 0        | Unclassified | chr6:43101305-43104238    | 0.934   |
| Uevld         | 0 | 0 | 0 | 138  | 2.3      | 0.974241 | 11.13555 | Stalled      | chr7:54178585-54215888    | 35.304  |
| Gipc2         | 0 | 0 | 0 | 91   | 1.516667 | 0.385301 | 1.348739 | Unclassified | chr3:151756804-151830864  | 72.061  |
| Rps28         | 0 | 0 | 0 | 561  | 9.35     | 114.302  | 3.114616 | Unclassified | chr17:33959983-33963443   | 1.461   |
| Gfra4         | 0 | 0 | 0 | 9    | 0.15     | 0.145475 | 0.553659 | Unclassified | chr2:130865911-130870824  | 2.914   |
| Gfra1         | 0 | 0 | 0 | 275  | 4.583333 | 0.258283 | 3.607102 | Unclassified | chr19:58311181-58530956   | 217.776 |
| Gfpt2         | 0 | 0 | 0 | 64   | 1.066667 | 0.111596 | 2.675798 | Unclassified | chr11:49605656-49652122   | 44.467  |
| Gfra3         | 0 | 0 | 0 | 35   | 0.583333 | 0.090075 | 0.487485 | Unclassified | chr18:34849556-34882041   | 30.486  |
| Gfap          | 0 | 0 | 0 | 36   | 0.6      | 0.506132 | 0.912468 | Unclassified | chr11:102748649-102760514 | 9.866   |
| Ipo11         | 0 | 0 | 0 | 1237 | 20.61667 | 5.02196  | 18.47189 | Unclassified | chr13:107584518-107728995 | 142.478 |
| S100a8        | 0 | 0 | 0 | 1    | 0.016667 | 0.130779 | 0        | Unclassified | chr3:90470992-90473956    | 0.965   |
| Gjd4          | 0 | 0 | 0 | 8    | 0.133333 | 0.019265 | 3.810657 | Unclassified | chr18:9278604-9284807     | 4.204   |
| Tcf19         | 0 | 0 | 0 | 199  | 3.316667 | 17.9551  | 5.924031 | Unclassified | chr17:35649679-35655769   | 4.091   |
| Dhx57         | 0 | 0 | 0 | 426  | 7.1      | 9.92952  | 10.31148 | Unclassified | chr17:80637643-80691816   | 52.174  |
| Unc5cl        | 0 | 0 | 0 | 120  | 2        | 2.01659  | 0.19699  | Unclassified | chr17:48592225-48608007   | 13.783  |
| Saa2          | 0 | 0 | 0 | 3    | 0.05     | 0.120299 | 0.425782 | Unclassified | chr7:54005202-54009684    | 2.483   |
| Abca13        | 0 | 0 | 0 | 247  | 4.116667 | 0.018411 | 0        | Unclassified | chr11:9089944-9584262     | 492.319 |
| Mut           | 0 | 0 | 0 | 187  | 3.116667 | 4.00339  | 44.99701 | Stalled      | chr17:41069673-41097848   | 26.176  |
| Ndubf4        | 0 | 0 | 0 | 196  | 3.266667 | 15.5002  | 7.263128 | Unclassified | chr16:37647687-37656454   | 6.768   |
| Necap1        | 0 | 0 | 0 | 522  | 8.7      | 6.27591  | 9.142912 | Unclassified | chr6:122822574-122838959  | 14.386  |
| Pcm1          | 0 | 0 | 0 | 905  | 15.08333 | 3.48163  | 26.00878 | Unclassified | chr8:42323112-42419441    | 94.33   |
| 4930453N24Rik | 0 | 0 | 0 | 181  | 3.016667 | 7.21144  | 30.36156 | Stalled      | chr16:64765930-64772765   | 4.836   |
| Olfr1510      | 0 | 0 | 0 | 0    | 0        | 0.053442 | 0        | Unclassified | chr14:53029563-53032602   | 1.04    |
| Olfr742       | 0 | 0 | 0 | 1    | 0.016667 | 0.002816 | 1        | Unclassified | chr14:51132795-51135914   | 1.12    |
| Olfr225       | 0 | 0 | 0 | 0    | 0        | 0.040051 | 0        | Unclassified | chr11:59402629-59405589   | 0.961   |
| Dcaf15        | 0 | 0 | 0 | 539  | 8.983333 | 15.1421  | 2.67187  | Elongating   | chr8:86620970-86630661    | 7.692   |
| Tspan1        | 0 | 0 | 0 | 84   | 1.4      | 0.039015 | 0.110104 | Unclassified | chr4:115834485-115842203  | 5.719   |
| Olfr995       | 0 | 0 | 0 | 0    | 0        | 0.056858 | 0        | Unclassified | chr2:85278365-85281313    | 0.949   |
| Olfr994       | 0 | 0 | 0 | 0    | 0        | 0.016352 | 0        | Unclassified | chr2:85270039-85272984    | 0.946   |
| Olfr1512      | 0 | 0 | 0 | 1    | 0.016667 | 0.040784 | 0        | Unclassified | chr14:52991785-52994726   | 0.942   |
| Krt20         | 0 | 0 | 0 | 12   | 0.2      | 0.029268 | 0.98603  | Unclassified | chr11:99289716-99301467   | 9.752   |
| Olfr996       | 0 | 0 | 0 | 0    | 0        | 0        | 0        | Unclassified | chr2:85417371-85420438    | 1.068   |
| Olfr998       | 0 | 0 | 0 | 3    | 0.05     | 0.03389  | 1        | Unclassified | chr2:85428666-85431676    | 1.011   |
| Krt82         | 0 | 0 | 0 | 12   | 0.2      | 0.108911 | 0.513204 | Unclassified | chr15:101371657-101383090 | 9.434   |
| Zfp295        | 0 | 0 | 0 | 548  | 9.133333 | 2.98887  | 24.86186 | Unclassified | chr16:98168598-98185786   | 15.189  |
| Pabpc5        | 0 | 0 | 0 | 3    | 0.05     | 0.115842 | 3        | Unclassified | chrX:117038804-117043774  | 2.971   |
| Nek5          | 0 | 0 | 0 | 65   | 1.083333 | 0.074638 | 2.790822 | Unclassified | chr8:23184087-23237525    | 51.439  |
| Cpn1          | 0 | 0 | 0 | 51   | 0.85     | 0.150443 | 0.373498 | Unclassified | chr19:44030799-44063010   | 30.212  |

|               |   |   |   |      |          |          |          |              |                           |         |
|---------------|---|---|---|------|----------|----------|----------|--------------|---------------------------|---------|
| Ear10         | 0 | 0 | 0 | 1    | 0.016667 | 0        | 0        | Unclassified | chr14:44500562-44503033   | 0.472   |
| Ear11         | 0 | 0 | 0 | 2    | 0.033333 | 0        | 0        | Unclassified | chr14:51874936-51877787   | 0.852   |
| Slc39a2       | 0 | 0 | 0 | 32   | 0.533333 | 0.19219  | 3.070127 | Unclassified | chr14:52511284-52516420   | 3.137   |
| Slc44a3       | 0 | 0 | 0 | 161  | 2.683333 | 0.065108 | 0.311143 | Unclassified | chr3:121162446-121237262  | 72.817  |
| Hdac6         | 0 | 0 | 0 | 183  | 3.05     | 4.62812  | 15.07614 | Stalled      | chrX:7507247-7527015      | 17.769  |
| Hdac2         | 0 | 0 | 0 | 341  | 5.683333 | 16.1202  | 30.45854 | Stalled      | chr10:36692349-36721694   | 27.346  |
| Decr1         | 0 | 0 | 0 | 157  | 2.616667 | 2.89247  | 30.38097 | Stalled      | chr4:15844386-15874654    | 28.269  |
| 1200014M14Rik | 0 | 0 | 0 | 400  | 6.666667 | 5.93595  | 14.092   | Unclassified | chr13:97156248-97185542   | 27.295  |
| Pdcl          | 0 | 0 | 0 | 265  | 4.416667 | 10.4736  | 23.24186 | Stalled      | chr2:37205593-37216852    | 9.26    |
| Mmd           | 0 | 0 | 0 | 298  | 4.966667 | 3.05772  | 22.82749 | Stalled      | chr11:90108789-90139887   | 29.099  |
| Wdr19         | 0 | 0 | 0 | 288  | 4.8      | 4.030801 | 14.6718  | Stalled      | chr5:65588934-65651654    | 60.721  |
| Kcng4         | 0 | 0 | 0 | 33   | 0.55     | 0.053878 | 0.25887  | Unclassified | chr8:122147753-122161580  | 11.828  |
| Ccdc52        | 0 | 0 | 0 | 248  | 4.133333 | 1.77086  | 49.50839 | Stalled      | chr16:44345513-44388605   | 41.093  |
| Tada2a        | 0 | 0 | 0 | 438  | 7.3      | 3.94886  | 15.04342 | Unclassified | chr11:83892421-83945070   | 50.65   |
| Synrg         | 0 | 0 | 0 | 516  | 8.6      | 4.26747  | 28.49934 | Stalled      | chr11:83775929-83855581   | 77.653  |
| Map1lc3a      | 0 | 0 | 0 | 64   | 1.066667 | 9.24222  | 1.062353 | Unclassified | chr2:155100179-155103809  | 1.631   |
| Ggnbp2        | 0 | 0 | 0 | 1408 | 23.46667 | 21.4765  | 21.5105  | Unclassified | chr11:84645862-84686240   | 38.379  |
| 4930474N05Rik | 0 | 0 | 0 | 0    | 0        | 0.022895 | 0        | Unclassified | chr14:36906150-36910041   | 1.892   |
| Catsper3      | 0 | 0 | 0 | 31   | 0.516667 | 0.04888  | 0.446787 | Unclassified | chr13:55883939-55910359   | 24.421  |
| Sval2         | 0 | 0 | 0 | 1    | 0.016667 | 0        | 1        | Unclassified | chr6:41808337-41814321    | 3.985   |
| Ii23r         | 0 | 0 | 0 | 44   | 0.733333 | 0.056664 | 0.635258 | Unclassified | chr6:67372925-67443849    | 68.925  |
| C530028O21Rik | 0 | 0 | 0 | 57   | 0.95     | 0.230717 | 1.239395 | Unclassified | chr6:124944737-124953112  | 6.376   |
| Olfr427       | 0 | 0 | 0 | 2    | 0.033333 | 0        | 1        | Unclassified | chr1:176027590-176030538  | 0.949   |
| Dnajc22       | 0 | 0 | 0 | 7    | 0.116667 | 0.061364 | 2.714859 | Unclassified | chr15:98927914-98935138   | 5.225   |
| Nlrp14        | 0 | 0 | 0 | 11   | 0.183333 | 0.027344 | 0        | Unclassified | chr7:114308503-114341616  | 31.114  |
| Nckap1l       | 0 | 0 | 0 | 811  | 13.51667 | 33.4742  | 10.02451 | Unclassified | chr15:103282255-103329231 | 44.977  |
| Ati3          | 0 | 0 | 0 | 687  | 11.45    | 5.11913  | 35.53094 | Unclassified | chr19:7566927-7613098     | 44.172  |
| Mal2          | 0 | 0 | 0 | 13   | 0.216667 | 0.073896 | 1.469649 | Unclassified | chr15:54400920-54434401   | 31.482  |
| Cd69          | 0 | 0 | 0 | 701  | 11.68333 | 11.4055  | 2.977312 | Elongating   | chr6:129217342-129227387  | 8.046   |
| Cd7           | 0 | 0 | 0 | 9    | 0.15     | 0.117942 | 0.714928 | Unclassified | chr11:120898064-120902732 | 2.669   |
| Cd6           | 0 | 0 | 0 | 99   | 1.65     | 0.083358 | 0.594088 | Unclassified | chr19:10863828-10906548   | 40.721  |
| Cd63          | 0 | 0 | 0 | 9    | 0.15     | 0.793751 | 0        | Unclassified | chr10:128343974-128349874 | 3.901   |
| Hgd           | 0 | 0 | 0 | 46   | 0.766667 | 0.015842 | 1.095549 | Unclassified | chr16:37578238-37632111   | 51.874  |
| Wasl          | 0 | 0 | 0 | 489  | 8.15     | 4.6385   | 35.19101 | Stalled      | chr6:24563810-24616995    | 51.186  |
| Isx           | 0 | 0 | 0 | 23   | 0.383333 | 0        | 0.983068 | Unclassified | chr8:77395072-77417405    | 20.334  |
| Pcdh18        | 0 | 0 | 0 | 10   | 0.166667 | 0.04705  | 0.591318 | Unclassified | chr3:49547217-49563238    | 14.022  |
| Kcnj5         | 0 | 0 | 0 | 36   | 0.6      | 0.04561  | 0.478606 | Unclassified | chr9:32122367-32153822    | 29.456  |
| Kcnj4         | 0 | 0 | 0 | 57   | 0.95     | 0.017867 | 1.455359 | Unclassified | chr15:79314143-79337671   | 21.529  |
| Clec4f        | 0 | 0 | 0 | 13   | 0.216667 | 0.069422 | 0        | Unclassified | chr6:83594535-83608110    | 11.576  |
| Kcnj6         | 0 | 0 | 0 | 269  | 4.483333 | 0.08599  | 1.941352 | Unclassified | chr16:94970289-95221303   | 249.015 |
| Kcnk1         | 0 | 0 | 0 | 42   | 0.7      | 0.038955 | 0.952952 | Unclassified | chr8:128517001-12854585   | 35.585  |
| ENSMUSG00000  | 0 | 0 | 0 | 0    | 0        | 0.051303 | 0        | Unclassified | chr17:13289525-13293338   | 1.814   |
| Prl8a8        | 0 | 0 | 0 | 1    | 0.016667 | 0        | 0        | Unclassified | chr13:27598940-27607082   | 6.143   |
| Kcnk4         | 0 | 0 | 0 | 32   | 0.533333 | 0.347186 | 1.086065 | Unclassified | chr19:7000179-7011005     | 8.827   |
| Gbe1          | 0 | 0 | 0 | 692  | 11.53333 | 1.99458  | 142.4739 | Stalled      | chr16:70312331-70569961   | 255.631 |
| 2310042D19Rik | 0 | 0 | 0 | 45   | 0.75     | 0        | 0.703333 | Unclassified | chr4:155588035-155595416  | 5.382   |
| Prei4         | 0 | 0 | 0 | 1055 | 17.58333 | 8.8473   | 16.47958 | Unclassified | chr2:132354818-132405984  | 49.167  |
| Muc5b         | 0 | 0 | 0 | 182  | 3.033333 | 0.03607  | 0.154989 | Unclassified | chr7:149022976-149058990  | 34.015  |
| Cfi           | 0 | 0 | 0 | 61   | 1.016667 | 0.012365 | 0        | Unclassified | chr3:129537656-129578246  | 38.591  |
| Cfl2          | 0 | 0 | 0 | 340  | 5.666667 | 3.07491  | 16.8406  | Unclassified | chr12:55959805-55965864   | 4.06    |
| Ccne2         | 0 | 0 | 0 | 645  | 10.75    | 3.65613  | 21.2188  | Unclassified | chr4:11116500-11131926    | 13.427  |
| Cftr          | 0 | 0 | 0 | 62   | 1.033333 | 0.559088 | 0        | Unclassified | chr6:18118686-18272769    | 152.084 |
| Chst4         | 0 | 0 | 0 | 9    | 0.15     | 0.044857 | 0        | Unclassified | chr8:112552974-112565234  | 10.261  |
| Senp8         | 0 | 0 | 0 | 244  | 4.066667 | 0.708817 | 55.29247 | Stalled      | chr9:59583692-59600417    | 14.726  |
| Plxna4        | 0 | 0 | 0 | 417  | 6.95     | 0.055496 | 1.553769 | Unclassified | chr6:32094558-32540192    | 443.635 |
| Syt14         | 0 | 0 | 0 | 93   | 1.55     | 0.125868 | 1.836862 | Unclassified | chr1:194723500-194863892  | 138.393 |
| Fcrla         | 0 | 0 | 0 | 104  | 1.733333 | 6.52229  | 1.963363 | Elongating   | chr1:172847726-172859714  | 9.989   |
| Zfp316        | 0 | 0 | 0 | 143  | 2.383333 | 0.996495 | 6.533986 | Unclassified | chr5:144011373-144033701  | 20.329  |
| Dusp27        | 0 | 0 | 0 | 47   | 0.783333 | 0.025505 | 0.790395 | Unclassified | chr1:168028279-168060029  | 29.751  |
| Acat1         | 0 | 0 | 0 | 509  | 8.483333 | 14.4319  | 10.79748 | Unclassified | chr9:53388626-53420455    | 29.83   |
| Sulf1         | 0 | 0 | 0 | 106  | 1.766667 | 0.077706 | 0        | Unclassified | chr1:12706625-12850453    | 141.829 |
| Sdcbp2        | 0 | 0 | 0 | 130  | 2.166667 | 0.176074 | 0.981877 | Unclassified | chr2:151396367-151415735  | 17.369  |
| Tmco2         | 0 | 0 | 0 | 1    | 0.016667 | 0.089126 | 0        | Unclassified | chr4:120778255-120783831  | 3.577   |
| 2300005B03Rik | 0 | 0 | 0 | 18   | 0.3      | 0.054476 | 1.576037 | Unclassified | chr15:74573268-74579117   | 3.85    |
| Ccnc          | 0 | 0 | 0 | 364  | 6.066667 | 7.47112  | 33.47152 | Stalled      | chr4:21652849-21677693    | 22.845  |
| Tgm7          | 0 | 0 | 0 | 23   | 0.383333 | 0.042278 | 0.863733 | Unclassified | chr2:120919325-120937527  | 16.203  |
| Zbtb4         | 0 | 0 | 0 | 385  | 6.416667 | 3.4815   | 4.380885 | Unclassified | chr11:69577413-69597528   | 18.116  |
| Trh           | 0 | 0 | 0 | 6    | 0.1      | 0.027841 | 1.327759 | Unclassified | chr6:92192055-92196642    | 2.588   |
| Fam24a        | 0 | 0 | 0 | 43   | 0.716667 | 0        | 0.377989 | Unclassified | chr7:138476135-138480230  | 2.096   |
| Bst1          | 0 | 0 | 0 | 127  | 2.116667 | 1.08068  | 1.531228 | Unclassified | chr5:44208131-44234707    | 24.577  |
| Smyd1         | 0 | 0 | 0 | 62   | 1.033333 | 0.049587 | 0.907439 | Unclassified | chr6:71163934-71214275    | 48.342  |
| Olfr1042      | 0 | 0 | 0 | 2    | 0.033333 | 0        | 2        | Unclassified | chr2:85999583-86002525    | 0.943   |
| Tmem164       | 0 | 0 | 0 | 790  | 13.16667 | 5.83858  | 27.69461 | Stalled      | chrX:139113960-139272781  | 156.822 |
| Dock7         | 0 | 0 | 0 | 283  | 4.716667 | 0.340289 | 9.115943 | Unclassified | chr4:98603355-98789606    | 184.252 |
| Olfr543       | 0 | 0 | 0 | 31   | 0.516667 | 0.158786 | 18       | Unclassified | chr7:109625286-109628416  | 1.131   |
| Olfr104       | 0 | 0 | 0 | 1    | 0.016667 | 0.056991 | 0        | Unclassified | chr17:37497052-37500032   | 0.981   |
| 4932431H17Rik | 0 | 0 | 0 | 36   | 0.6      | 0.671146 | 2.393436 | Unclassified | chr3:58420221-58443129    | 20.909  |
| Kihl2         | 0 | 0 | 0 | 630  | 10.5     | 4.55223  | 27.39101 | Stalled      | chr8:67218658-67375716    | 155.059 |
| Impad1        | 0 | 0 | 0 | 370  | 6.166667 | 5.89851  | 12.01458 | Unclassified | chr4:4691500-4722453      | 28.954  |
| Sec24d        | 0 | 0 | 0 | 696  | 11.6     | 5.66135  | 14.10534 | Unclassified | chr3:122968413-123068554  | 98.142  |
| Calml4        | 0 | 0 | 0 | 91   | 1.516667 | 0.03565  | 0.336923 | Unclassified | chr9:62703910-62723724    | 17.815  |
| Otop3         | 0 | 0 | 0 | 39   | 0.65     | 0.058208 | 1.061194 | Unclassified | chr11:115194047-115208240 | 12.194  |
| Mtfmt         | 0 | 0 | 0 | 397  | 6.166667 | 9.01802  | 16.1725  | Unclassified | chr9:65281588-65300861    | 17.274  |
| Lnp           | 0 | 0 | 0 | 546  | 9.1      | 1.45152  | 39.01581 | Stalled      | chr2:74352893-74419005    | 64.113  |
| Tnr           | 0 | 0 | 0 | 361  | 6.016667 | 0.057014 | 0.528498 | Unclassified | chr1:161451899-161855053  | 401.155 |
| Tfpi2         | 0 | 0 | 0 | 6    | 0.1      | 0.033996 | 1.408372 | Unclassified | chr6:3912594-3920354      | 5.761   |



|               |   |   |   |      |          |          |          |              |                          |         |
|---------------|---|---|---|------|----------|----------|----------|--------------|--------------------------|---------|
| Tfpi          | 0 | 0 | 0 | 48   | 0.8      | 0.566942 | 1.487383 | Unclassified | chr2:84273016-84316331   | 41.316  |
| Tff3          | 0 | 0 | 0 | 6    | 0.1      | 0        | 1.048525 | Unclassified | chr17:31262251-31268556  | 4.306   |
| Tff2          | 0 | 0 | 0 | 7    | 0.116667 | 0        | 1.70203  | Unclassified | chr17:31278006-31283227  | 3.222   |
| Tfam          | 0 | 0 | 0 | 499  | 8.316667 | 8.22574  | 14.66553 | Unclassified | chr10:70688224-70702792  | 12.569  |
| Zfp738        | 0 | 0 | 0 | 91   | 1.516667 | 1.69435  | 17.93147 | Stalled      | chr13:67768377-67786449  | 16.073  |
| Msi3          | 0 | 0 | 0 | 468  | 7.8      | 7.46022  | 37.90065 | Unclassified | chrX:165092049-165113834 | 19.786  |
| B4galt6       | 0 | 0 | 0 | 82   | 1.366667 | 0.320117 | 1.29698  | Unclassified | chr18:20844503-20906905  | 60.403  |
| Msmb          | 0 | 0 | 0 | 30   | 0.5      | 0.074083 | 0.345417 | Unclassified | chr14:32953208-32971510  | 16.303  |
| Rab9          | 0 | 0 | 0 | 217  | 3.616667 | 9.54727  | 13.11626 | Stalled      | chrX:162895190-162919622 | 22.433  |
| Msn           | 0 | 0 | 0 | 1633 | 27.21667 | 75.2899  | 14.07522 | Unclassified | chrX:93289383-93363892   | 72.51   |
| Rab11fip1     | 0 | 0 | 0 | 247  | 4.116667 | 1.68392  | 22.51102 | Stalled      | chr8:28249244-28287120   | 35.877  |
| Zfp456        | 0 | 0 | 0 | 121  | 2.016667 | 0.799158 | 20.49888 | Stalled      | chr13:67464519-67478699  | 12.181  |
| 9630025I21Rik | 0 | 0 | 0 | 49   | 0.816667 | 1.30766  | 5.909114 | Unclassified | chr13:67572448-67587189  | 12.742  |
| Exph5         | 0 | 0 | 0 | 76   | 1.266667 | 0.072047 | 0        | Unclassified | chr9:53107774-53189263   | 79.49   |
| Ear1          | 0 | 0 | 0 | 0    | 0        | 0.003702 | 0        | Unclassified | chr14:44396430-44399304  | 0.875   |
| Bmp5          | 0 | 0 | 0 | 73   | 1.216667 | 0.020279 | 1.279952 | Unclassified | chr9:75621171-75746824   | 123.654 |
| Fbxl7         | 0 | 0 | 0 | 187  | 3.116667 | 0.052754 | 0.659286 | Unclassified | chr15:26470213-26827319  | 355.107 |
| Amy1          | 0 | 0 | 0 | 11   | 0.183333 | 0.043396 | 0        | Unclassified | chr3:113258869-113282668 | 21.8    |
| Mat1a         | 0 | 0 | 0 | 21   | 0.35     | 0.035956 | 0.486944 | Unclassified | chr14:41916669-41937701  | 19.033  |
| Iqgap3        | 0 | 0 | 0 | 359  | 5.983333 | 4.58453  | 3.982909 | Unclassified | chr3:87883972-87924970   | 38.999  |
| Etv2          | 0 | 0 | 0 | 8    | 0.133333 | 1.02692  | 0.342083 | Unclassified | chr7:31418634-31422871   | 2.238   |
| Etv1          | 0 | 0 | 0 | 51   | 0.85     | 0.236155 | 0.654005 | Unclassified | chr12:39504844-39594793  | 87.95   |
| D630002G06Rik | 0 | 0 | 0 | 15   | 0.25     | 0.021132 | 0.804668 | Unclassified | chr19:8234657-8295329    | 58.673  |
| Rnasen        | 0 | 0 | 0 | 929  | 15.48333 | 8.11766  | 37.13899 | Unclassified | chr15:12752569-12865046  | 110.478 |
| Scd4          | 0 | 0 | 0 | 24   | 0.4      | 2.16135  | 0.790541 | Unclassified | chr19:44405815-44421233  | 13.419  |
| Oog4          | 0 | 0 | 0 | 6    | 0.1      | 0.026169 | 0.801849 | Unclassified | chr4:143027066-143042205 | 13.14   |
| Rasgrp4       | 0 | 0 | 0 | 178  | 2.966667 | 2.43781  | 2.33924  | Elongating   | chr7:29918005-29938970   | 18.966  |
| Spc25         | 0 | 0 | 0 | 323  | 5.383333 | 8.0125   | 17.92599 | Unclassified | chr2:69031952-69046214   | 12.263  |
| Hpgd          | 0 | 0 | 0 | 12   | 0.2      | 0.059646 | 1.4782   | Unclassified | chr8:58771348-58799843   | 26.496  |
| Epcam         | 0 | 0 | 0 | 58   | 0.966667 | 2.61177  | 1.533044 | Unclassified | chr17:88033318-88050467  | 15.15   |
| Ly6f          | 0 | 0 | 0 | 2    | 0.033333 | 0.020625 | 1        | Unclassified | chr15:75096850-75102664  | 3.815   |
| Sbk2          | 0 | 0 | 0 | 26   | 0.433333 | 0.135146 | 3.903674 | Unclassified | chr7:4908683-4917950     | 7.268   |
| Opn1sw        | 0 | 0 | 0 | 78   | 1.3      | 0.106399 | 0.367893 | Unclassified | chr6:29326670-29332513   | 3.844   |
| Klk1b22       | 0 | 0 | 0 | 6    | 0.1      | 0.080202 | 0        | Unclassified | chr7:51366052-51372246   | 4.195   |
| Gira2         | 0 | 0 | 0 | 56   | 0.933333 | 0.009362 | 0        | Unclassified | chrX:161456948-161766913 | 197.966 |
| Fancb         | 0 | 0 | 0 | 155  | 2.583333 | 1.65022  | 19.20184 | Stalled      | chrX:161416523-161435203 | 16.681  |
| Mdm4          | 0 | 0 | 0 | 861  | 14.35    | 10.3365  | 11.9827  | Unclassified | chr1:134886421-134923925 | 35.505  |
| Zfp637        | 0 | 0 | 0 | 98   | 1.633333 | 4.38968  | 10.6747  | Stalled      | chr6:117789259-117795974 | 4.716   |
| V1ri4         | 0 | 0 | 0 | 0    | 0        | 0.042579 | 0        | Unclassified | chr13:22564486-22567389  | 0.904   |
| Efs           | 0 | 0 | 0 | 20   | 0.333333 | 0.064602 | 0        | Unclassified | chr14:55535379-55547625  | 10.247  |
| Fbxo27        | 0 | 0 | 0 | 30   | 0.5      | 0.729928 | 1.569076 | Unclassified | chr7:29475867-29484354   | 6.488   |
| Plscr4        | 0 | 0 | 0 | 30   | 0.5      | 0.534833 | 3.212269 | Unclassified | chr9:92350215-92387354   | 35.14   |
| 5033411D12Rik | 0 | 0 | 0 | 703  | 11.71667 | 0.773385 | 74.15308 | Stalled      | chr13:16949309-17788599  | 837.291 |
| P2ry4         | 0 | 0 | 0 | 2    | 0.033333 | 0.023124 | 0        | Unclassified | chrX:97785492-97792208   | 4.717   |
| Olfir1023     | 0 | 0 | 0 | 0    | 0        | 0.027385 | 0        | Unclassified | chr2:85724958-85727894   | 0.937   |
| Lhb           | 0 | 0 | 0 | 125  | 2.083333 | 0        | 63       | Unclassified | chr7:52674315-52677224   | 0.91    |
| Gucy2e        | 0 | 0 | 0 | 33   | 0.55     | 0.333745 | 0        | Unclassified | chr11:69031618-69052524  | 18.907  |
| Nkx6-2        | 0 | 0 | 0 | 27   | 0.45     | 0.211988 | 0.602042 | Unclassified | chr7:146767118-146770696 | 1.579   |
| Foxo4         | 0 | 0 | 0 | 450  | 7.5      | 6.198    | 3.059473 | Unclassified | chrX:98447866-98456211   | 6.346   |
| Guca2b        | 0 | 0 | 0 | 7    | 0.116667 | 2.05061  | 1.205742 | Unclassified | chr4:119329207-119333550 | 2.344   |
| Socs6         | 0 | 0 | 0 | 240  | 4        | 1.92401  | 14.40114 | Stalled      | chr18:89037271-89065599  | 26.329  |
| Pcnx          | 0 | 0 | 0 | 755  | 12.58333 | 2.12288  | 10.76262 | Unclassified | chr12:82959016-83101911  | 140.896 |
| Guca2a        | 0 | 0 | 0 | 33   | 0.55     | 0        | 0.547741 | Unclassified | chr4:119308336-119312070 | 1.735   |
| Plcx3         | 0 | 0 | 0 | 79   | 1.316667 | 0.06103  | 2.195119 | Unclassified | chr15:4323490-4525579    | 200.09  |
| Slpi          | 0 | 0 | 0 | 53   | 0.883333 | 88.584   | 2.261742 | Unclassified | chr2:164179806-164184243 | 2.438   |
| Pglyrp4       | 0 | 0 | 0 | 15   | 0.25     | 0.017273 | 0        | Unclassified | chr3:90528827-90545439   | 14.613  |
| Slit3         | 0 | 0 | 0 | 745  | 12.41667 | 0.189986 | 1.325854 | Unclassified | chr11:34932957-35522005  | 587.049 |
| Slit2         | 0 | 0 | 0 | 157  | 2.616667 | 0.131565 | 2.722031 | Unclassified | chr5:48372393-48697017   | 322.625 |
| Tirap         | 0 | 0 | 0 | 259  | 4.316667 | 2.48373  | 6.494139 | Unclassified | chr9:34994360-35009459   | 13.1    |
| Agtr1a        | 0 | 0 | 0 | 31   | 0.516667 | 0.145895 | 0        | Unclassified | chr13:30426224-30474736  | 46.513  |
| Nckap5        | 0 | 0 | 0 | 636  | 10.6     | 0.153946 | 1.183461 | Unclassified | chr1:127810212-128729209 | 916.998 |
| Akr7a5        | 0 | 0 | 0 | 181  | 3.016667 | 6.94778  | 36.62182 | Stalled      | chr4:138864658-138874701 | 8.044   |
| Kcnp4         | 0 | 0 | 0 | 293  | 4.883333 | 0.111294 | 0        | Unclassified | chr5:48780741-49282796   | 500.056 |
| Klk1b9        | 0 | 0 | 0 | 7    | 0.116667 | 0.017761 | 0.453328 | Unclassified | chr7:51229430-51235746   | 4.317   |
| Rab8b         | 0 | 0 | 0 | 1651 | 27.51667 | 9.94103  | 9.682565 | Unclassified | chr9:66691471-66769512   | 76.042  |
| Spaca5        | 0 | 0 | 0 | 1    | 0.016667 | 0.060077 | 0        | Unclassified | chrX:20643531-20655089   | 9.559   |
| Mknk1         | 0 | 0 | 0 | 786  | 13.1     | 11.1334  | 11.39435 | Unclassified | chr4:115509850-115551853 | 40.004  |
| Fam175b       | 0 | 0 | 0 | 443  | 7.383333 | 6.19483  | 11.80185 | Unclassified | chr7:140048907-140076794 | 25.888  |
| Angpt4        | 0 | 0 | 0 | 78   | 1.3      | 0        | 0.625682 | Unclassified | chr2:151735067-151770390 | 33.324  |
| 4921506M07Rik | 0 | 0 | 0 | 45   | 0.75     | 0.060659 | 0        | Unclassified | chr12:58663101-58723096  | 57.996  |
| Gm1381        | 0 | 0 | 0 | 22   | 0.366667 | 0        | 0.483858 | Unclassified | chr5:92998562-93020310   | 19.749  |
| Cla6          | 0 | 0 | 0 | 8    | 0.133333 | 0.012562 | 0.754911 | Unclassified | chr3:144615449-144640009 | 22.561  |
| Krt28         | 0 | 0 | 0 | 13   | 0.216667 | 0.020755 | 0.894361 | Unclassified | chr11:99226320-99238217  | 9.898   |
| Slc22a16      | 0 | 0 | 0 | 37   | 0.616667 | 0        | 1.472414 | Unclassified | chr10:40288167-40323938  | 33.772  |
| Ythdc1        | 0 | 0 | 0 | 756  | 12.6     | 15.5713  | 25.66699 | Unclassified | chr5:87231514-87265682   | 32.169  |
| Epb4.115      | 0 | 0 | 0 | 234  | 3.9      | 1.68713  | 13.49393 | Stalled      | chr1:121441609-121547577 | 103.969 |
| Gja5          | 0 | 0 | 0 | 20   | 0.333333 | 0.083295 | 1.086513 | Unclassified | chr3:96834338-96857557   | 21.22   |
| V1rf1         | 0 | 0 | 0 | 1    | 0.016667 | 0.090621 | 1        | Unclassified | chr17:21363789-21366779  | 0.991   |
| V1rf2         | 0 | 0 | 0 | 3    | 0.05     | 0        | 0        | Unclassified | chr17:21395390-21399827  | 2.438   |
| V1re7         | 0 | 0 | 0 | 0    | 0        | 0        | 0        | Unclassified | chr17:21026679-21029615  | 0.937   |
| V1re8         | 0 | 0 | 0 | 0    | 0        | 0.026953 | 0        | Unclassified | chr17:20981514-20984465  | 0.952   |
| V1rf5         | 0 | 0 | 0 | 2    | 0.033333 | 0        | 2        | Unclassified | chr17:21130690-21133650  | 0.961   |
| V1rg2         | 0 | 0 | 0 | 1    | 0.016667 | 0        | 1        | Unclassified | chr7:12339605-12342517   | 0.913   |
| V1rf3         | 0 | 0 | 0 | 0    | 0        | 0        | 0        | Unclassified | chr17:21448980-21451850  | 0.871   |
| V1rf4         | 0 | 0 | 0 | 0    | 0        | 0.022866 | 0        | Unclassified | chr17:21421496-21424617  | 1.122   |
| Cadps2        | 0 | 0 | 0 | 292  | 4.866667 | 0.160773 | 0.665689 | Unclassified | chr6:23212837-23791300   | 576.464 |

|               |   |   |   |      |          |          |          |              |                           |         |
|---------------|---|---|---|------|----------|----------|----------|--------------|---------------------------|---------|
| V1rg3         | 0 | 0 | 0 | 0    | 0        | 0.041477 | 0        | Unclassified | chr7:12776313-12779240    | 0.928   |
| Eral1         | 0 | 0 | 0 | 245  | 4.083333 | 12.2485  | 16.11285 | Unclassified | chr11:77886877-77895885   | 7.009   |
| Tigd4         | 0 | 0 | 0 | 8    | 0.133333 | 1.29991  | 0.76161  | Unclassified | chr3:84395495-84400954    | 3.46    |
| Trmprs11d     | 0 | 0 | 0 | 24   | 0.4      | 0.050113 | 0        | Unclassified | chr5:86731878-86804412    | 70.535  |
| Rnd1          | 0 | 0 | 0 | 89   | 1.483333 | 0.855036 | 20.54336 | Stalled      | chr15:98499635-98509892   | 8.258   |
| Gdnf          | 0 | 0 | 0 | 28   | 0.466667 | 0.054786 | 0.505597 | Unclassified | chr15:7759010-7787575     | 26.566  |
| Oc90          | 0 | 0 | 0 | 48   | 0.8      | 0.051353 | 0.820483 | Unclassified | chr15:65707618-65742615   | 32.998  |
| Ntf5          | 0 | 0 | 0 | 28   | 0.466667 | 0.68554  | 1.926385 | Unclassified | chr7:52667064-52672549    | 3.486   |
| Gja4          | 0 | 0 | 0 | 12   | 0.2      | 0.126269 | 1.402231 | Unclassified | chr4:126988664-126993222  | 2.559   |
| Alkbh6        | 0 | 0 | 0 | 184  | 3.066667 | 9.39789  | 9.173658 | Unclassified | chr7:31091771-31099322    | 5.552   |
| Ptk7          | 0 | 0 | 0 | 125  | 2.083333 | 0.111446 | 3.312143 | Unclassified | chr17:46701399-46768453   | 65.055  |
| Lfrn3         | 0 | 0 | 0 | 19   | 0.316667 | 0.076154 | 1.088065 | Unclassified | chr7:31140532-31149791    | 7.26    |
| Mlf2          | 0 | 0 | 0 | 334  | 5.566667 | 63.6162  | 15.2972  | Unclassified | chr6:124879405-124886165  | 4.761   |
| Aif1l         | 0 | 0 | 0 | 60   | 1        | 0.203864 | 0.290789 | Unclassified | chr2:31803822-31828962    | 23.141  |
| AU022870      | 0 | 0 | 0 | 656  | 10.93333 | 16.951   | 4.672536 | Unclassified | chr5:144748777-144777722  | 26.946  |
| Krtap4-7      | 0 | 0 | 0 | 1    | 0.016667 | 0.026209 | 0        | Unclassified | chr11:99504425-99507403   | 0.979   |
| Dhx36         | 0 | 0 | 0 | 481  | 8.016667 | 4.85811  | 21.64781 | Unclassified | chr3:62272563-62312910    | 38.348  |
| Pcdhb19       | 0 | 0 | 0 | 3    | 0.05     | 0.019032 | 0        | Unclassified | chr18:37654651-37661365   | 4.715   |
| Ddr2          | 0 | 0 | 0 | 122  | 2.033333 | 0.047926 | 0.488673 | Unclassified | chr1:171902437-172021075  | 116.639 |
| Lpo           | 0 | 0 | 0 | 56   | 0.933333 | 0.262598 | 0.257099 | Unclassified | chr11:87619929-87641616   | 19.688  |
| Glo1          | 0 | 0 | 0 | 229  | 3.816667 | 17.285   | 13.2575  | Unclassified | chr17:30729806-30751604   | 19.799  |
| Adora1        | 0 | 0 | 0 | 77   | 1.283333 | 0.094286 | 0.656854 | Unclassified | chr1:136095798-136134008  | 36.211  |
| Tdh           | 0 | 0 | 0 | 15   | 0.25     | 0.252211 | 0.529333 | Unclassified | chr14:64111185-64129929   | 16.745  |
| Hspd1         | 0 | 0 | 0 | 823  | 13.71667 | 55.1789  | 16.49167 | Unclassified | chr1:55134677-55146776    | 10.1    |
| Gm14461       | 0 | 0 | 0 | 40   | 0.666667 | 0.021601 | 0        | Unclassified | chr2:78075703-78142387    | 64.685  |
| Zcchc14       | 0 | 0 | 0 | 132  | 2.2      | 0.083034 | 1.172193 | Unclassified | chr8:124122604-124177833  | 53.23   |
| Ano5          | 0 | 0 | 0 | 45   | 0.75     | 0.031279 | 1.336839 | Unclassified | chr7:58764398-58854079    | 87.682  |
| Olfr1136      | 0 | 0 | 0 | 0    | 0        | 0.027473 | 0        | Unclassified | chr2:87533104-87536037    | 0.934   |
| Fcgr1         | 0 | 0 | 0 | 31   | 0.516667 | 0.064354 | 2.915395 | Unclassified | chr3:96086831-96099892    | 11.062  |
| Aimp2         | 0 | 0 | 0 | 693  | 11.55    | 30.2879  | 11.57843 | Unclassified | chr5:144663572-144672687  | 7.116   |
| H2-M10.2      | 0 | 0 | 0 | 10   | 0.166667 | 0        | 0.371866 | Unclassified | chr17:36421225-36425366   | 2.142   |
| Fcer1g        | 0 | 0 | 0 | 106  | 1.766667 | 1.77193  | 4.911141 | Unclassified | chr1:173159702-173166480  | 4.779   |
| Fsd1l         | 0 | 0 | 0 | 30   | 0.5      | 0.151565 | 2.785662 | Unclassified | chr4:53642426-53664491    | 20.066  |
| Efcab5        | 0 | 0 | 0 | 118  | 1.966667 | 0.137595 | 0        | Unclassified | chr11:76903416-77004470   | 99.055  |
| Creg1         | 0 | 0 | 0 | 212  | 3.533333 | 11.5838  | 25.32016 | Stalled      | chr1:167691910-167705435  | 11.526  |
| Nt5dc1        | 0 | 0 | 0 | 739  | 12.31667 | 3.57595  | 29.20461 | Unclassified | chr10:34023417-34140334   | 114.918 |
| Gm12581       | 0 | 0 | 0 | 54   | 0.9      | 0.070419 | 2.081969 | Unclassified | chr11:117720065-117726857 | 4.793   |
| Clrn3         | 0 | 0 | 0 | 48   | 0.8      | 0.023197 | 0.538206 | Unclassified | chr7:142703138-142722337  | 17.2    |
| Pid1          | 0 | 0 | 0 | 166  | 2.766667 | 0.235425 | 0.602781 | Unclassified | chr1:84032868-84283220    | 248.353 |
| Dpep3         | 0 | 0 | 0 | 8    | 0.133333 | 0.038121 | 0.411814 | Unclassified | chr8:108497419-108505319  | 5.901   |
| Zfp300        | 0 | 0 | 0 | 27   | 0.45     | 0.72631  | 10.16467 | Stalled      | chrX:20656275-20668355    | 10.081  |
| B020018G12Rik | 0 | 0 | 0 | 1    | 0.016667 | 35.5438  | 1        | Unclassified | chr1:177907906-177911247  | 1.342   |
| Ntsr1         | 0 | 0 | 0 | 56   | 0.933333 | 0.042547 | 0        | Unclassified | chr2:180232680-180279684  | 45.005  |
| Cnpy1         | 0 | 0 | 0 | 36   | 0.6      | 0.101137 | 0.487673 | Unclassified | chr5:28532002-28566413    | 32.412  |
| Slc45a1       | 0 | 0 | 0 | 40   | 0.666667 | 0.030003 | 0.364336 | Unclassified | chr4:150003504-150028283  | 22.78   |
| Flywch1       | 0 | 0 | 0 | 275  | 4.583333 | 9.63005  | 19.36848 | Unclassified | chr17:23892391-23910558   | 16.168  |
| Zfp568        | 0 | 0 | 0 | 554  | 9.233333 | 1.87511  | 17.01223 | Unclassified | chr7:30766973-30813300    | 44.328  |
| Poldip2       | 0 | 0 | 0 | 662  | 11.03333 | 17.7541  | 17.06077 | Unclassified | chr11:78323797-78336238   | 10.442  |
| Pdzd8         | 0 | 0 | 0 | 599  | 9.983333 | 6.40623  | 30.26068 | Unclassified | chr19:59370573-59422270   | 49.698  |
| Pex5l         | 0 | 0 | 0 | 83   | 1.383333 | 0.041853 | 1.246722 | Unclassified | chr3:32848554-32983958    | 133.405 |
| Bend3         | 0 | 0 | 0 | 712  | 11.86667 | 1.87364  | 11.10254 | Unclassified | chr10:43196945-43235223   | 36.279  |
| Nphs2         | 0 | 0 | 0 | 17   | 0.283333 | 0.07835  | 0.537984 | Unclassified | chr1:158238865-158258166  | 17.302  |
| Ntrk1         | 0 | 0 | 0 | 34   | 0.566667 | 0.064379 | 1.483691 | Unclassified | chr3:87582165-87601084    | 16.92   |
| Rnase1        | 0 | 0 | 0 | 2    | 0.033333 | 0.105702 | 0        | Unclassified | chr14:51764676-51768442   | 1.767   |
| Zfp451        | 0 | 0 | 0 | 579  | 9.65     | 3.49318  | 18.85749 | Unclassified | chr1:33818597-33873272    | 52.676  |
| Klhl6         | 0 | 0 | 0 | 321  | 5.35     | 16.0849  | 10.86277 | Unclassified | chr16:19946585-19985122   | 36.538  |
| Hist1h2bm     | 0 | 0 | 0 | 243  | 4.05     | 0        | 225      | Unclassified | chr13:21811966-21814347   | 0.382   |
| Hist1h2bf     | 0 | 0 | 0 | 207  | 3.45     | 0        | 165      | Unclassified | chr13:23665678-23668059   | 0.382   |
| Olfr1246      | 0 | 0 | 0 | 1    | 0.016667 | 0        | 0        | Unclassified | chr2:89430225-89433303    | 1.079   |
| Tpsb2         | 0 | 0 | 0 | 6    | 0.1      | 0        | 1.296422 | Unclassified | chr17:25501277-25505037   | 1.761   |
| 4932429P05Rik | 0 | 0 | 0 | 3    | 0.05     | 0.008287 | 0.689922 | Unclassified | chrX:86995606-87000830    | 3.225   |
| Ugt2b5        | 0 | 0 | 0 | 4    | 0.066667 | 0.013555 | 0        | Unclassified | chr5:87553973-87571365    | 15.393  |
| Ugt8a         | 0 | 0 | 0 | 34   | 0.566667 | 0.007122 | 0.692925 | Unclassified | chr3:125568260-125643468  | 73.209  |
| 4930522H14Rik | 0 | 0 | 0 | 11   | 0.183333 | 0        | 2.271048 | Unclassified | chr4:109177979-109205902  | 25.924  |
| Slc35a2       | 0 | 0 | 0 | 311  | 5.183333 | 7.13616  | 13.06718 | Unclassified | chrX:7459369-7471618      | 10.25   |
| Ufd1l         | 0 | 0 | 0 | 661  | 11.01667 | 12.4824  | 7.226472 | Unclassified | chr16:18810386-18835354   | 22.969  |
| Psg18         | 0 | 0 | 0 | 6    | 0.1      | 0.022341 | 0.672158 | Unclassified | chr7:18931156-18942356    | 9.201   |
| Psg19         | 0 | 0 | 0 | 8    | 0.133333 | 0.033781 | 0.582957 | Unclassified | chr7:19374473-19385859    | 9.387   |
| Ssxb10        | 0 | 0 | 0 | 4    | 0.066667 | 0        | 0.722556 | Unclassified | chrX:7902549-7913361      | 8.813   |
| Vgf           | 0 | 0 | 0 | 59   | 0.983333 | 1.72664  | 0.385409 | Unclassified | chr5:137504164-137509221  | 3.058   |
| Cdh10         | 0 | 0 | 0 | 79   | 1.316667 | 0.041404 | 2.152123 | Unclassified | chr15:18748083-18943989   | 193.907 |
| C030034I22Rik | 0 | 0 | 0 | 429  | 7.15     | 10.7725  | 0.229698 | Unclassified | chr17:69763786-69768530   | 2.745   |
| Dppa4         | 0 | 0 | 0 | 9    | 0.15     | 0.03087  | 0        | Unclassified | chr16:48281847-48294405   | 10.559  |
| Plod3         | 0 | 0 | 0 | 276  | 4.6      | 8.34328  | 12.6884  | Unclassified | chr5:137460888-137472514  | 9.627   |
| Mical2        | 0 | 0 | 0 | 177  | 2.95     | 0.068664 | 0.83923  | Unclassified | chr7:119367403-119496926  | 127.524 |
| Tcf23         | 0 | 0 | 0 | 15   | 0.25     | 0.11756  | 1.797222 | Unclassified | chr5:31269049-31279391    | 8.343   |
| Psg17         | 0 | 0 | 0 | 9    | 0.15     | 0        | 0        | Unclassified | chr7:19399285-19408940    | 7.656   |
| Zzz3          | 0 | 0 | 0 | 1674 | 27.9     | 3.30661  | 37.77194 | Unclassified | chr3:152056973-152125790  | 66.818  |
| Ntrk3         | 0 | 0 | 0 | 283  | 4.716667 | 0.026756 | 1.161041 | Unclassified | chr7:85336999-85724724    | 385.726 |
| Olfr943       | 0 | 0 | 0 | 0    | 0        | 0        | 0        | Unclassified | chr9:38989764-38992709    | 0.946   |
| Dsg3          | 0 | 0 | 0 | 22   | 0.366667 | 0.040558 | 0.5883   | Unclassified | chr18:20666804-20699811   | 31.008  |
| Ptn           | 0 | 0 | 0 | 59   | 0.983333 | 0.031708 | 0        | Unclassified | chr6:36665662-36763361    | 95.7    |
| Olfr17        | 0 | 0 | 0 | 2    | 0.033333 | 0        | 1        | Unclassified | chr7:114238980-114241927  | 0.948   |
| Fam123b       | 0 | 0 | 0 | 88   | 1.466667 | 1.10313  | 11.84386 | Stalled      | chrX:92615652-92642179    | 24.528  |
| Ankrd12       | 0 | 0 | 0 | 735  | 12.25    | 2.30767  | 47.30887 | Stalled      | chr17:66316840-66428386   | 109.547 |
| Gm16379       | 0 | 0 | 0 | 17   | 0.283333 | 129.436  | 8        | Unclassified | chr9:14649687-14652215    | 0.529   |

|               |   |          |   |      |          |          |          |              |                           |         |
|---------------|---|----------|---|------|----------|----------|----------|--------------|---------------------------|---------|
| Cldn19        | 0 | 0        | 0 | 24   | 0.4      | 0.066563 | 0.23074  | Unclassified | chr4:118926045-118935043  | 6.999   |
| Pias2         | 0 | 0        | 0 | 731  | 12.18333 | 11.963   | 26.78355 | Unclassified | chr18:77301946-77394447   | 90.502  |
| Dusp3         | 0 | 0        | 0 | 287  | 4.783333 | 5.80902  | 8.661358 | Unclassified | chr11:101835472-101848084 | 10.613  |
| Olfr670       | 0 | 0        | 0 | 0    | 0        | 0        | 0        | Unclassified | chr7:112108305-112111244  | 0.94    |
| Arhgef6       | 0 | 0        | 0 | 768  | 12.8     | 15.0628  | 6.362299 | Unclassified | chrX:54484664-54593906    | 107.243 |
| Rnf32         | 0 | 0        | 0 | 25   | 0.416667 | 0.023155 | 1.066691 | Unclassified | chr5:29522545-29551831    | 27.287  |
| Gm13102       | 0 | 0        | 0 | 2    | 0.033333 | 0.02565  | 0        | Unclassified | chr4:143687782-143700004  | 10.223  |
| 1700049G17Rik | 0 | 0        | 0 | 86   | 1.433333 | 0.8383   | 9.913192 | Unclassified | chr7:28692410-28716449    | 22.04   |
| Gm12253       | 0 | 0        | 0 | 11   | 0.183333 | 0.037806 | 0.472605 | Unclassified | chr11:58244060-58255124   | 9.065   |
| Lmbr1         | 0 | 0        | 0 | 278  | 4.633333 | 0.912039 | 69.95784 | Stalled      | chr5:29556341-29706930    | 148.59  |
| Bace2         | 0 | 0        | 0 | 144  | 2.4      | 0.257287 | 2.630785 | Unclassified | chr16:97576334-97660619   | 82.286  |
| Olfr18        | 0 | 0        | 0 | 4    | 0.066667 | 0.044347 | 0        | Unclassified | chr9:20118335-20142538    | 22.204  |
| Cldn14        | 0 | 0        | 0 | 198  | 3.3      | 0.105484 | 0        | Unclassified | chr16:93919275-94011082   | 89.808  |
| Lekr1         | 0 | 0        | 0 | 171  | 2.85     | 0.222185 | 42.66965 | Stalled      | chr3:65468156-65490101    | 19.946  |
| Olfr976       | 0 | 0        | 0 | 1    | 0.016667 | 0.026129 | 1        | Unclassified | chr9:39763573-39766554    | 0.982   |
| Olfr361       | 0 | 0        | 0 | 0    | 0        | 0        | 0        | Unclassified | chr2:36940297-36943266    | 0.97    |
| Olfr434       | 0 | 0        | 0 | 1    | 0.016667 | 0.019885 | 0        | Unclassified | chr6:43164913-43167879    | 0.967   |
| Olfr731       | 0 | 0        | 0 | 0    | 0        | 0.026129 | 0        | Unclassified | chr14:50857577-50860558   | 0.982   |
| Olfr495       | 0 | 0        | 0 | 0    | 0        | 0.015561 | 0        | Unclassified | chr7:115536635-115539628  | 0.994   |
| Tdrkh         | 0 | 0        | 0 | 27   | 0.45     | 0.401417 | 10.23488 | Unclassified | chr3:94215239-94235421    | 18.183  |
| Fbxo39        | 0 | 0        | 0 | 36   | 0.6      | 0.14232  | 2.787105 | Unclassified | chr11:72125945-72132921   | 4.977   |
| Ube2q2        | 0 | 0        | 0 | 523  | 8.716667 | 3.78473  | 24.35318 | Unclassified | chr9:54995175-55055328    | 58.154  |
| Itgb8         | 0 | 0        | 0 | 56   | 0.933333 | 0.281381 | 3.6485   | Unclassified | chr12:120401275-120478749 | 75.475  |
| Olfr1450      | 0 | 0        | 0 | 0    | 0        | 0.045607 | 0        | Unclassified | chr19:13026080-13029058   | 0.979   |
| Dek           | 0 | 0        | 0 | 847  | 14.11667 | 34.2704  | 15.20232 | Unclassified | chr13:47180136-47203589   | 21.454  |
| Sec16b        | 0 | 0        | 0 | 74   | 1.233333 | 0.122778 | 0        | Unclassified | chr1:159434926-159498553  | 61.628  |
| Gm1123        | 0 | 0        | 0 | 65   | 1.083333 | 0.151946 | 0.305609 | Unclassified | chr9:98907383-98938109    | 28.727  |
| 4922501C03Rik | 0 | 0        | 0 | 261  | 4.35     | 2.54883  | 17.18629 | Stalled      | chr9:87086797-87152367    | 63.571  |
| Adh5          | 0 | 0        | 0 | 550  | 9.166667 | 36.3858  | 12.73682 | Unclassified | chr3:138104127-138118463  | 12.337  |
| Cfd           | 0 | 0        | 0 | 18   | 0.3      | 0.111084 | 0        | Unclassified | chr10:79351597-79355401   | 1.805   |
| Gpr182        | 0 | 0        | 0 | 21   | 0.35     | 0.143749 | 0.221879 | Unclassified | chr10:127186657-127190854 | 2.198   |
| Wdr76         | 0 | 0        | 0 | 602  | 10.03333 | 4.79962  | 16.58645 | Unclassified | chr2:121330458-121370595  | 38.138  |
| Ndfip1        | 0 | 0        | 0 | 883  | 14.71667 | 51.8858  | 17.33649 | Unclassified | chr18:38576628-38624060   | 45.433  |
| Dap3          | 0 | 0        | 0 | 947  | 15.78333 | 10.371   | 30.91336 | Unclassified | chr3:88724724-88756204    | 29.481  |
| Vps35         | 0 | 0        | 0 | 728  | 12.13333 | 13.862   | 66.46914 | Unclassified | chr8:87784290-87825396    | 39.107  |
| Ankmy1        | 0 | 0        | 0 | 59   | 0.983333 | 0.035568 | 1.554384 | Unclassified | chr1:94766705-94801483    | 32.779  |
| Ugt2b34       | 0 | 0        | 0 | 12   | 0.2      | 0.020279 | 0.617868 | Unclassified | chr5:87318794-87337962    | 17.169  |
| Olfr934       | 0 | 0        | 0 | 1    | 0.016667 | 0        | 1        | Unclassified | chr9:38789694-38792627    | 0.934   |
| Kcnk18        | 0 | 0        | 0 | 41   | 0.683333 | 0.033816 | 0.294831 | Unclassified | chr19:59292137-59311860   | 17.724  |
| Nanos1        | 0 | 0        | 0 | 324  | 5.4      | 2.89107  | 0.538398 | Unclassified | chr19:60829889-60835817   | 3.929   |
| Dnajb2        | 0 | 0        | 0 | 347  | 5.783333 | 9.87492  | 13.93169 | Unclassified | chr1:75230997-75242265    | 9.269   |
| Dbc1          | 0 | 0        | 0 | 76   | 1.266667 | 0.007642 | 0.724556 | Unclassified | chr4:68422405-68617431    | 193.027 |
| Plag1         | 0 | 0        | 0 | 266  | 4.433333 | 0.199089 | 26.00264 | Stalled      | chr4:3828304-3867552      | 37.249  |
| Olfr458       | 0 | 0        | 0 | 0    | 0        | 0.049211 | 0        | Unclassified | chr6:42410074-42413016    | 0.943   |
| Rabgef1       | 0 | 0        | 0 | 274  | 4.566667 | 4.86271  | 0.834391 | Unclassified | chr5:130661049-130690207  | 27.159  |
| Crnk1         | 0 | 0        | 0 | 276  | 4.6      | 8.6218   | 6.560082 | Unclassified | chr2:145743217-145762436  | 17.22   |
| Pcdh17        | 0 | 0        | 0 | 45   | 0.75     | 0.190004 | 2.813679 | Unclassified | chr14:84841369-84936867   | 93.499  |
| Dmrt1         | 0 | 0        | 0 | 13   | 0.216667 | 0.069226 | 2.888505 | Unclassified | chr4:89352888-89361457    | 6.57    |
| Ankrd58       | 0 | 0        | 0 | 9    | 0.15     | 0.708173 | 2        | Unclassified | chrX:34586839-34590413    | 1.575   |
| Nbea          | 0 | 0        | 0 | 327  | 5.45     | 0.071182 | 0        | Unclassified | chr3:55429119-55989623    | 558.505 |
| Hspa4l        | 0 | 0        | 0 | 140  | 2.333333 | 1.94094  | 31.93598 | Stalled      | chr3:40547534-40594287    | 44.754  |
| Chi314        | 0 | 130.7236 | 0 | 11   | 0.183333 | 0.076087 | 0        | Unclassified | chr3:106004408-106024397  | 17.99   |
| Blmh          | 0 | 0        | 0 | 773  | 12.88333 | 30.4046  | 16.08888 | Unclassified | chr11:76757157-76800891   | 41.735  |
| Gm853         | 0 | 0        | 0 | 16   | 0.266667 | 0.017414 | 0        | Unclassified | chr4:129886352-129901539  | 13.188  |
| Gm1527        | 0 | 0        | 0 | 7    | 0.116667 | 0.033214 | 0        | Unclassified | chr3:28789538-28825646    | 34.109  |
| Dock11        | 0 | 0        | 0 | 1044 | 17.4     | 5.78134  | 18.1927  | Unclassified | chrX:33426826-33616557    | 187.732 |
| Rcor3         | 0 | 0        | 0 | 352  | 5.866667 | 1.86536  | 26.15692 | Stalled      | chr1:193924342-193963669  | 37.328  |
| Clec2e        | 0 | 0        | 0 | 8    | 0.133333 | 0.023766 | 0.535994 | Unclassified | chr6:129041849-129052934  | 9.086   |
| Gm2016        | 0 | 0        | 0 | 3    | 0.05     | 0        | 0        | Unclassified | chr12:89110519-89116307   | 3.789   |
| Ap1ar         | 0 | 0        | 0 | 409  | 6.816667 | 9.86782  | 23.06626 | Unclassified | chr3:127510182-127542410  | 30.229  |
| Crip3         | 0 | 0        | 0 | 8    | 0.133333 | 0.151672 | 1.137032 | Unclassified | chr17:46563890-46568720   | 2.831   |
| Slc35f1       | 0 | 0        | 0 | 215  | 3.583333 | 0.090201 | 0        | Unclassified | chr10:52408306-52831428   | 421.123 |
| Dmx1          | 0 | 0        | 0 | 902  | 15.03333 | 2.13494  | 51.5406  | Stalled      | chr18:49990666-50124739   | 132.074 |
| 2200002J24Rik | 0 | 0        | 0 | 29   | 0.483333 | 0.105052 | 5.68323  | Unclassified | chr7:31481944-31485553    | 1.61    |
| Gsdmd         | 0 | 0        | 0 | 153  | 2.55     | 16.7034  | 5.437918 | Unclassified | chr15:75690768-75697834   | 5.067   |
| Piwil4        | 0 | 0        | 0 | 118  | 1.966667 | 0.111784 | 0.487387 | Unclassified | chr9:14506801-14547177    | 38.377  |
| Slitrk2       | 0 | 0        | 0 | 1    | 0.016667 | 0.011572 | 0        | Unclassified | chrX:63904333-63914576    | 8.244   |
| Cux2          | 0 | 0        | 0 | 326  | 5.433333 | 0.037599 | 1.476321 | Unclassified | chr5:122310224-122499834  | 187.611 |
| Olfr1019      | 0 | 0        | 0 | 4    | 0.066667 | 0        | 3        | Unclassified | chr2:85681013-85683946    | 0.934   |
| Olfr1048      | 0 | 0        | 0 | 0    | 0        | 0        | 0        | Unclassified | chr2:86076027-86078990    | 0.964   |
| Olfr389       | 0 | 0        | 0 | 1    | 0.016667 | 0        | 1        | Unclassified | chr11:73589888-73592827   | 0.94    |
| Olfr393       | 0 | 0        | 0 | 1    | 0.016667 | 0        | 0        | Unclassified | chr11:73660686-73663625   | 0.94    |
| Olfr1052      | 0 | 0        | 0 | 2    | 0.033333 | 0        | 1        | Unclassified | chr2:86135974-86138913    | 0.94    |
| Acsm4         | 0 | 0        | 0 | 73   | 1.216667 | 0.035717 | 0.249011 | Unclassified | chr7:126831539-126858080  | 24.542  |
| Dcun1d3       | 0 | 0        | 0 | 372  | 6.2      | 0.930652 | 15.46754 | Stalled      | chr7:126996677-127040972  | 42.296  |
| Cd46          | 0 | 0        | 0 | 117  | 1.95     | 1.87015  | 42.78735 | Stalled      | chr1:196868093-196920442  | 50.35   |
| Bat5          | 0 | 0        | 0 | 379  | 6.316667 | 7.34587  | 11.46402 | Unclassified | chr17:35224235-35239932   | 13.698  |
| Meis1         | 0 | 0        | 0 | 146  | 2.433333 | 0.955753 | 9.349232 | Unclassified | chr11:18780430-18920683   | 138.254 |
| Hspa1a        | 0 | 0        | 0 | 38   | 0.633333 | 2.03296  | 16.10055 | Stalled      | chr17:35106303-35111101   | 2.799   |
| 4933409G03Rik | 0 | 0        | 0 | 16   | 0.266667 | 0.057429 | 0        | Unclassified | chr2:68418469-68454520    | 34.052  |
| Ehd3          | 0 | 0        | 0 | 145  | 2.416667 | 3.59374  | 6.120973 | Unclassified | chr17:74152180-74181433   | 27.254  |
| Gm11437       | 0 | 0        | 0 | 24   | 0.4      | 0.020925 | 0.463094 | Unclassified | chr11:83961866-83982978   | 19.113  |
| Kcne3         | 0 | 0        | 0 | 19   | 0.316667 | 0.113979 | 5.090787 | Unclassified | chr7:107325206-107333374  | 6.169   |
| Rps6          | 0 | 0        | 0 | 883  | 14.71667 | 0        | 8.827078 | Unclassified | chr4:86500002-86505271    | 3.27    |
| Fbxo33        | 0 | 0        | 0 | 504  | 8.4      | 5.53527  | 22.60437 | Unclassified | chr12:60301641-60322470   | 18.83   |
| Olfr142       | 0 | 0        | 0 | 0    | 0        | 0.011486 | 0        | Unclassified | chr2:90092225-90095143    | 0.919   |

|                      |   |   |   |      |          |          |          |              |                           |         |
|----------------------|---|---|---|------|----------|----------|----------|--------------|---------------------------|---------|
| <b>Fam19a1</b>       | 0 | 0 | 0 | 303  | 5.05     | 0.027596 | 0.643384 | Unclassified | chr6:96061147-96607191    | 544.045 |
| <b>Wwp1</b>          | 0 | 0 | 0 | 471  | 7.85     | 1.21685  | 50.30376 | Stalled      | chr4:19536819-19638140    | 99.322  |
| <b>Fbxl4</b>         | 0 | 0 | 0 | 470  | 7.833333 | 1.57152  | 38.77221 | Stalled      | chr4:22282711-22361193    | 76.483  |
| <b>Prc1</b>          | 0 | 0 | 0 | 828  | 13.8     | 16.3843  | 10.95133 | Unclassified | chr7:87437350-87461145    | 21.796  |
| <b>Fam38b</b>        | 0 | 0 | 0 | 271  | 4.516667 | 0.035972 | 0.582927 | Unclassified | chr18:63169867-63548837   | 376.971 |
| <b>Esyt3</b>         | 0 | 0 | 0 | 83   | 1.383333 | 0.102736 | 1.154817 | Unclassified | chr9:99210385-99260949    | 48.565  |
| <b>Sdk1</b>          | 0 | 0 | 0 | 963  | 16.05    | 0.091836 | 4.042157 | Unclassified | chr5:141715487-142689745  | 972.259 |
| <b>Casq1</b>         | 0 | 0 | 0 | 72   | 1.2      | 0.075229 | 0.115419 | Unclassified | chr1:174140024-174152026  | 10.003  |
| <b>Casq2</b>         | 0 | 0 | 0 | 69   | 1.15     | 0.02606  | 1.45087  | Unclassified | chr3:101888432-101950435  | 60.004  |
| <b>Casr</b>          | 0 | 0 | 0 | 131  | 2.183333 | 0.081896 | 1.035203 | Unclassified | chr16:36493781-36564220   | 68.44   |
| <b>Ipo8</b>          | 0 | 0 | 0 | 424  | 7.066667 | 5.24168  | 50.48599 | Stalled      | chr6:148719205-148781989  | 60.785  |
| <b>Pbx3</b>          | 0 | 0 | 0 | 477  | 7.95     | 1.74017  | 21.02043 | Stalled      | chr2:34027428-34229556    | 200.129 |
| <b>Irx3</b>          | 0 | 0 | 0 | 4    | 0.066667 | 0.096661 | 0.480654 | Unclassified | chr8:94322423-94327273    | 2.851   |
| <b>Ltv1</b>          | 0 | 0 | 0 | 442  | 7.366667 | 19.0703  | 13.04789 | Unclassified | chr10:12898443-12914943   | 14.501  |
| <b>Cdk20</b>         | 0 | 0 | 0 | 62   | 1.033333 | 1.94957  | 11.41046 | Stalled      | chr13:64531860-64541029   | 7.17    |
| <b>Ino80d</b>        | 0 | 0 | 0 | 1094 | 18.23333 | 1.41333  | 13.62013 | Unclassified | chr1:63094374-63162841    | 66.468  |
| <b>Ugt2b37</b>       | 0 | 0 | 0 | 8    | 0.133333 | 0        | 0        | Unclassified | chr5:87669516-87685813    | 14.298  |
| <b>Trp53bp1</b>      | 0 | 0 | 0 | 439  | 7.316667 | 5.02958  | 7.818089 | Unclassified | chr2:121022464-121099122  | 74.659  |
| <b>Mapk4</b>         | 0 | 0 | 0 | 217  | 3.616667 | 0.030561 | 1.162901 | Unclassified | chr18:74088140-74226603   | 136.464 |
| <b>Padi3</b>         | 0 | 0 | 0 | 62   | 1.033333 | 0.724738 | 2.82772  | Unclassified | chr4:140341283-140368563  | 25.281  |
| <b>Zfp708</b>        | 0 | 0 | 0 | 125  | 2.083333 | 0.701991 | 0.368766 | Unclassified | chr13:67170333-67200912   | 28.58   |
| <b>Ngp</b>           | 0 | 0 | 0 | 15   | 0.25     | 0        | 0.501136 | Unclassified | chr9:110320311-110325516  | 3.206   |
| <b>Enpp2</b>         | 0 | 0 | 0 | 42   | 0.7      | 0.118596 | 1.345912 | Unclassified | chr15:54670452-54753701   | 81.25   |
| <b>Olfr1248</b>      | 0 | 0 | 0 | 1    | 0.016667 | 0.019576 | 1        | Unclassified | chr2:89457324-89460402    | 1.079   |
| <b>Zfp799</b>        | 0 | 0 | 0 | 197  | 3.283333 | 1.55775  | 10.14555 | Unclassified | chr17:32954148-32969193   | 13.046  |
| <b>Nnmt</b>          | 0 | 0 | 0 | 15   | 0.25     | 0.026869 | 0.465424 | Unclassified | chr9:48399994-48415182    | 13.189  |
| <b>38962</b>         | 0 | 0 | 0 | 66   | 1.1      | 1.21205  | 1.786854 | Unclassified | chr15:82103364-82124872   | 19.509  |
| <b>Nipal2</b>        | 0 | 0 | 0 | 59   | 0.983333 | 0.043559 | 1.955932 | Unclassified | chr15:34502553-34610461   | 105.909 |
| <b>Sgcd</b>          | 0 | 0 | 0 | 235  | 3.916667 | 0.027483 | 0.630636 | Unclassified | chr11:46792284-47194804   | 400.521 |
| <b>Sgcg</b>          | 0 | 0 | 0 | 39   | 0.65     | 0.072924 | 0.509134 | Unclassified | chr14:61837951-61879327   | 39.377  |
| <b>Olfr1101</b>      | 0 | 0 | 0 | 0    | 0        | 0        | 0        | Unclassified | chr2:86828398-86831331    | 0.934   |
| <b>Sh3yl1</b>        | 0 | 0 | 0 | 181  | 3.016667 | 7.00349  | 78.2585  | Stalled      | chr12:31594533-31645014   | 48.482  |
| <b>Hdgf</b>          | 0 | 0 | 0 | 641  | 10.68333 | 112.289  | 7.522987 | Unclassified | chr3:87708242-87720054    | 9.813   |
| <b>Rhbd1l</b>        | 0 | 0 | 0 | 200  | 3.333333 | 4.39301  | 2.090329 | Elongating   | chr17:25971409-25976072   | 2.664   |
| <b>Purg</b>          | 0 | 0 | 0 | 202  | 3.366667 | 3.78202  | 9.903166 | Unclassified | chr8:34494796-34527941    | 31.146  |
| <b>Dlx5</b>          | 0 | 0 | 0 | 7    | 0.116667 | 0.23232  | 0.395039 | Unclassified | chr6:6827804-6834068      | 4.265   |
| <b>Dlx4</b>          | 0 | 0 | 0 | 14   | 0.233333 | 0.387111 | 0.978437 | Unclassified | chr11:95001760-95009115   | 5.356   |
| <b>Dlx6</b>          | 0 | 0 | 0 | 8    | 0.133333 | 0.279622 | 1.290529 | Unclassified | chr6:6811333-6817970      | 4.638   |
| <b>Dlx1</b>          | 0 | 0 | 0 | 18   | 0.3      | 0.842318 | 1.839473 | Unclassified | chr2:71365501-71372037    | 4.537   |
| <b>Dlx3</b>          | 0 | 0 | 0 | 14   | 0.233333 | 0.16393  | 1.861549 | Unclassified | chr11:94979448-94986599   | 5.152   |
| <b>Dlx2</b>          | 0 | 0 | 0 | 14   | 0.233333 | 0.507741 | 0.75353  | Unclassified | chr2:71381464-71386811    | 3.348   |
| <b>Abo</b>           | 0 | 0 | 0 | 33   | 0.55     | 0.014409 | 0        | Unclassified | chr2:26698022-26722499    | 22.478  |
| <b>T</b>             | 0 | 0 | 0 | 13   | 0.216667 | 0.100225 | 0.541109 | Unclassified | chr17:8625287-8635361     | 8.075   |
| <b>Gats2</b>         | 0 | 0 | 0 | 181  | 3.016667 | 2.04478  | 12.7528  | Stalled      | chr5:134573617-134617628  | 42.012  |
| <b>2310007B03Rik</b> | 0 | 0 | 0 | 19   | 0.316667 | 0.033536 | 0        | Unclassified | chr1:95047931-95059525    | 9.595   |
| <b>Sav1</b>          | 0 | 0 | 0 | 482  | 8.033333 | 12.2841  | 24.81809 | Unclassified | chr12:71065998-71089989   | 21.992  |
| <b>Aox4</b>          | 0 | 0 | 0 | 68   | 1.133333 | 0.056709 | 0.92858  | Unclassified | chr1:58265240-58325440    | 58.201  |
| <b>Nrgn</b>          | 0 | 0 | 0 | 26   | 0.433333 | 3.10166  | 2.389103 | Unclassified | chr9:37352077-37362330    | 8.254   |
| <b>Iars2</b>         | 0 | 0 | 0 | 679  | 11.31667 | 12.267   | 23.13819 | Unclassified | chr1:187110540-187155280  | 42.741  |
| <b>Arsb</b>          | 0 | 0 | 0 | 807  | 13.45    | 3.83899  | 43.36842 | Stalled      | chr13:94539633-94712971   | 171.339 |
| <b>Gpr180</b>        | 0 | 0 | 0 | 272  | 4.533333 | 3.19344  | 12.45038 | Unclassified | chr14:118534348-118563454 | 27.107  |
| <b>Nudt11</b>        | 0 | 0 | 0 | 0    | 0        | 0.13539  | 0        | Unclassified | chrX:5622624-5631869      | 7.246   |
| <b>Gjb1</b>          | 0 | 0 | 0 | 7    | 0.116667 | 0.265579 | 0        | Unclassified | chrX:98570675-98580963    | 8.289   |
| <b>Gjc1</b>          | 0 | 0 | 0 | 27   | 0.45     | 0.188114 | 1.864596 | Unclassified | chr11:102660791-102683000 | 20.21   |
| <b>Asgr1</b>         | 0 | 0 | 0 | 10   | 0.166667 | 0.030883 | 0        | Unclassified | chr11:69865870-69871396   | 3.527   |
| <b>Gja8</b>          | 0 | 0 | 0 | 12   | 0.2      | 0.027582 | 0.915569 | Unclassified | chr3:96722944-96731853    | 6.91    |
| <b>Gja3</b>          | 0 | 0 | 0 | 23   | 0.383333 | 0.045416 | 0        | Unclassified | chr14:57654496-57678782   | 22.287  |
| <b>Gja10</b>         | 0 | 0 | 0 | 6    | 0.1      | 0.109758 | 0        | Unclassified | chr4:32687839-32691357    | 1.519   |
| <b>S100a11</b>       | 0 | 0 | 0 | 99   | 1.65     | 18.4434  | 7.610732 | Unclassified | chr3:93322417-93330210    | 5.794   |
| <b>Csad</b>          | 0 | 0 | 0 | 48   | 0.8      | 1.51362  | 1.29845  | Unclassified | chr15:102007428-102021474 | 12.047  |
| <b>Lrrc27</b>        | 0 | 0 | 0 | 166  | 2.766667 | 2.34872  | 28.99165 | Stalled      | chr7:146396886-146428872  | 29.987  |
| <b>Ryr2</b>          | 0 | 0 | 0 | 1089 | 18.15    | 0.674603 | 3.396173 | Unclassified | chr13:11645369-12201212   | 553.844 |
| <b>S100a1</b>        | 0 | 0 | 0 | 194  | 3.233333 | 2.9378   | 4.320226 | Unclassified | chr3:90314955-90320252    | 3.298   |
| <b>Ryr3</b>          | 0 | 0 | 0 | 342  | 5.7      | 0.028281 | 0.539997 | Unclassified | chr2:112471538-112872488  | 398.951 |
| <b>Dip2c</b>         | 0 | 0 | 0 | 513  | 8.55     | 0.529331 | 14.52321 | Stalled      | chr13:9273771-9668171     | 392.401 |
| <b>Cd207</b>         | 0 | 0 | 0 | 14   | 0.233333 | 0.067366 | 0.639764 | Unclassified | chr6:83621208-83629851    | 6.644   |
| <b>Ambp</b>          | 0 | 0 | 0 | 15   | 0.25     | 0.062367 | 0.902355 | Unclassified | chr4:62804312-62817176    | 10.865  |
| <b>6430571L13Rik</b> | 0 | 0 | 0 | 208  | 3.466667 | 1.01446  | 3.398219 | Unclassified | chr9:107240970-107252014  | 9.045   |
| <b>Trhde</b>         | 0 | 0 | 0 | 161  | 2.683333 | 0.033598 | 1.44041  | Unclassified | chr10:113835876-114240426 | 402.551 |
| <b>Pcyt1a</b>        | 0 | 0 | 0 | 385  | 6.416667 | 5.64518  | 31.9805  | Stalled      | chr16:32429006-32475151   | 44.146  |
| <b>Ctla2b</b>        | 0 | 0 | 0 | 3    | 0.05     | 0.079368 | 0.523356 | Unclassified | chr13:60996711-61000808   | 2.098   |
| <b>Ctla2a</b>        | 0 | 0 | 0 | 1    | 0.016667 | 0.052767 | 0        | Unclassified | chr13:61035515-61039986   | 2.472   |
| <b>Gm239</b>         | 0 | 0 | 0 | 147  | 2.45     | 0.016349 | 0        | Unclassified | chr10:116213600-116335935 | 120.336 |
| <b>Gpr77</b>         | 0 | 0 | 0 | 56   | 0.933333 | 0.115866 | 0.27841  | Unclassified | chr7:16819933-16831503    | 9.571   |
| <b>Slk</b>           | 0 | 0 | 0 | 341  | 5.683333 | 5.31888  | 21.46939 | Stalled      | chr19:47652508-47719735   | 65.228  |
| <b>Olfr206</b>       | 0 | 0 | 0 | 1    | 0.016667 | 0.034773 | 0        | Unclassified | chr16:59344604-59347525   | 0.922   |
| <b>Olfr1494</b>      | 0 | 0 | 0 | 1    | 0.016667 | 0        | 0        | Unclassified | chr19:13821597-13824545   | 0.949   |
| <b>Olfr123</b>       | 0 | 0 | 0 | 1    | 0.016667 | 0        | 0        | Unclassified | chr17:37930390-37933320   | 0.931   |
| <b>Olfr121</b>       | 0 | 0 | 0 | 0    | 0        | 0.029245 | 0        | Unclassified | chr17:37883810-37889949   | 4.14    |
| <b>Olfr116</b>       | 0 | 0 | 0 | 1    | 0.016667 | 0.029264 | 1        | Unclassified | chr17:37760612-37763578   | 0.967   |
| <b>Olfr1504</b>      | 0 | 0 | 0 | 1    | 0.016667 | 0.053638 | 1        | Unclassified | chr19:13961750-13964698   | 0.949   |
| <b>Npnt1</b>         | 0 | 0 | 0 | 450  | 7.5      | 6.21791  | 21.10393 | Unclassified | chr11:29028750-29061828   | 31.079  |
| <b>Olfr1487</b>      | 0 | 0 | 0 | 0    | 0        | 0.002781 | 0        | Unclassified | chr19:13691653-13694601   | 0.949   |
| <b>Olfr1489</b>      | 0 | 0 | 0 | 3    | 0.05     | 0        | 2        | Unclassified | chr19:13705602-13708544   | 0.943   |
| <b>Zfp449</b>        | 0 | 0 | 0 | 36   | 0.6      | 0.12686  | 11.68692 | Stalled      | chrX:53597576-53618851    | 19.276  |
| <b>Syde1</b>         | 0 | 0 | 0 | 77   | 1.283333 | 0.194895 | 1.382185 | Unclassified | chr10:78047247-78056709   | 7.463   |



|                      |   |   |   |      |          |          |          |              |                           |         |
|----------------------|---|---|---|------|----------|----------|----------|--------------|---------------------------|---------|
| <b>Npb</b>           | 0 | 0 | 0 | 92   | 1.533333 | 0.630311 | 71       | Unclassified | chr11:120467790-120470414 | 0.625   |
| <b>Myf5</b>          | 0 | 0 | 0 | 9    | 0.15     | 0.049223 | 1.2785   | Unclassified | chr10:106919963-106925190 | 3.228   |
| <b>Mycs</b>          | 0 | 0 | 0 | 3    | 0.05     | 0.013546 | 0.576809 | Unclassified | chrX:5044021-5048383      | 2.363   |
| <b>Ppp1r15a</b>      | 0 | 0 | 0 | 539  | 8.983333 | 15.5964  | 8.106308 | Unclassified | chr7:52778289-52783638    | 3.35    |
| <b>Spag5</b>         | 0 | 0 | 0 | 554  | 9.233333 | 10.695   | 9.675445 | Unclassified | chr11:78113092-78135955   | 20.864  |
| <b>Avpr1a</b>        | 0 | 0 | 0 | 6    | 0.1      | 0.225521 | 2.394673 | Unclassified | chr10:121883554-121890509 | 4.956   |
| <b>1500032L24Rik</b> | 0 | 0 | 0 | 311  | 5.183333 | 143.633  | 5.21205  | Unclassified | chr15:82174475-82179492   | 3.018   |
| <b>Myf6</b>          | 0 | 0 | 0 | 3    | 0.05     | 0.071886 | 0.465526 | Unclassified | chr10:106929915-106933785 | 1.871   |
| <b>Myh1</b>          | 0 | 0 | 0 | 19   | 0.316667 | 0.026418 | 0.579863 | Unclassified | chr11:67011615-67038077   | 24.463  |
| <b>Exosc7</b>        | 0 | 0 | 0 | 775  | 12.91667 | 38.84    | 22.02074 | Unclassified | chr9:123020348-123045247  | 22.9    |
| <b>Sap18</b>         | 0 | 0 | 0 | 319  | 5.316667 | 12.2607  | 6.046388 | Unclassified | chr14:58415025-58423815   | 6.791   |
| <b>Sars</b>          | 0 | 0 | 0 | 518  | 8.633333 | 81.548   | 11.5836  | Unclassified | chr3:108229529-108250087  | 18.559  |
| <b>Sar1a</b>         | 0 | 0 | 0 | 679  | 11.31667 | 22.9945  | 12.01465 | Unclassified | chr10:61141068-61156045   | 12.978  |
| <b>Sh3pxd2b</b>      | 0 | 0 | 0 | 113  | 1.883333 | 0.120714 | 1.703542 | Unclassified | chr11:32245810-32328183   | 80.374  |
| <b>Sat1</b>          | 0 | 0 | 0 | 110  | 1.833333 | 13.5805  | 15.40687 | Stalled      | chrX:151647681-151652952  | 3.272   |
| <b>Ahsa2</b>         | 0 | 0 | 0 | 468  | 7.8      | 7.74616  | 4.034814 | Unclassified | chr11:23387881-23399946   | 10.066  |
| <b>Apoa1</b>         | 0 | 0 | 0 | 18   | 0.3      | 0.585156 | 0.534575 | Unclassified | chr9:46034712-46038549    | 1.838   |
| <b>Olfr155</b>       | 0 | 0 | 0 | 3    | 0.05     | 0.049119 | 2        | Unclassified | chr4:43865163-43868335    | 1.173   |
| <b>Olfr156</b>       | 0 | 0 | 0 | 0    | 0        | 0.030547 | 0        | Unclassified | chr4:43833207-43836305    | 1.099   |
| <b>Hapln3</b>        | 0 | 0 | 0 | 23   | 0.383333 | 0.035775 | 1.344428 | Unclassified | chr7:86261912-86277904    | 13.993  |
| <b>2900097C17Rik</b> | 0 | 0 | 0 | 81   | 1.35     | 11.1851  | 11.23584 | Stalled      | chr2:156213799-156220715  | 4.917   |
| <b>Rnf125</b>        | 0 | 0 | 0 | 80   | 1.333333 | 0.13916  | 0.326082 | Unclassified | chr18:21101125-21142349   | 39.225  |
| <b>Olfr159</b>       | 0 | 0 | 0 | 3    | 0.05     | 0.008237 | 1        | Unclassified | chr4:43782921-43785881    | 0.961   |
| <b>Gkn1</b>          | 0 | 0 | 0 | 15   | 0.25     | 0.094547 | 0        | Unclassified | chr6:87295646-87302909    | 5.264   |
| <b>Pcll1</b>         | 0 | 0 | 0 | 308  | 5.133333 | 0.367577 | 5.93892  | Unclassified | chr1:55460789-55811129    | 348.341 |
| <b>Ccdc113</b>       | 0 | 0 | 0 | 26   | 0.433333 | 0.30223  | 2.078183 | Unclassified | chr8:98055999-98082788    | 24.79   |
| <b>Wrn</b>           | 0 | 0 | 0 | 674  | 11.23333 | 3.3979   | 37.82173 | Stalled      | chr8:34344844-34497999    | 151.156 |
| <b>Gkn2</b>          | 0 | 0 | 0 | 13   | 0.216667 | 0        | 0.318083 | Unclassified | chr6:87321358-87329488    | 6.131   |
| <b>Taz</b>           | 0 | 0 | 0 | 303  | 5.05     | 12.8215  | 20.6444  | Stalled      | chrX:71526100-71535487    | 7.388   |
| <b>Ubxn6</b>         | 0 | 0 | 0 | 503  | 8.383333 | 16.4076  | 1.189626 | Elongating   | chr17:56207676-56216412   | 6.737   |
| <b>Rep15</b>         | 0 | 0 | 0 | 6    | 0.1      | 0.156615 | 4        | Unclassified | chr6:146979058-146982040  | 0.983   |
| <b>Ubi4</b>          | 0 | 0 | 0 | 136  | 2.266667 | 44.0255  | 12.36879 | Unclassified | chrX:71612739-71615866    | 1.128   |
| <b>Wsb2</b>          | 0 | 0 | 0 | 384  | 6.4      | 7.73131  | 2.533644 | Elongating   | chr5:117805313-117828598  | 21.286  |
| <b>Krtdap</b>        | 0 | 0 | 0 | 6    | 0.1      | 0        | 0        | Unclassified | chr7:31570923-31576102    | 3.18    |
| <b>Rhot1</b>         | 0 | 0 | 0 | 507  | 8.45     | 5.2736   | 30.20362 | Unclassified | chr11:80020556-80081409   | 58.854  |
| <b>Pnkp</b>          | 0 | 0 | 0 | 253  | 4.216667 | 15.5424  | 6.461095 | Unclassified | chr7:52110550-52118299    | 5.75    |
| <b>Stard3</b>        | 0 | 0 | 0 | 437  | 7.283333 | 8.7067   | 17.00699 | Unclassified | chr11:98217697-98242412   | 22.716  |
| <b>Rnf130</b>        | 0 | 0 | 0 | 460  | 7.666667 | 13.0695  | 32.96544 | Stalled      | chr11:49836832-49918235   | 79.404  |
| <b>Sytl1</b>         | 0 | 0 | 0 | 66   | 1.1      | 0.865333 | 3.767111 | Unclassified | chr4:132809004-132821002  | 9.999   |
| <b>Sic22a17</b>      | 0 | 0 | 0 | 41   | 0.683333 | 2.40205  | 6.094036 | Unclassified | chr14:55525563-55533969   | 6.407   |
| <b>C1gal1c1</b>      | 0 | 0 | 0 | 158  | 2.633333 | 3.32433  | 18.35424 | Stalled      | chrX:35983959-35990320    | 4.362   |
| <b>Chtf18</b>        | 0 | 0 | 0 | 240  | 4        | 10.3002  | 11.98289 | Unclassified | chr17:25855974-25866360   | 8.387   |
| <b>Csrnp3</b>        | 0 | 0 | 0 | 106  | 1.766667 | 0.016783 | 0.627288 | Unclassified | chr2:65681823-65681541    | 177.719 |
| <b>Socs2</b>         | 0 | 0 | 0 | 1694 | 28.23333 | 12.9956  | 4.054655 | Unclassified | chr10:94874123-94881491   | 5.369   |
| <b>Sypl2</b>         | 0 | 0 | 0 | 37   | 0.616667 | 0.063154 | 2.569011 | Unclassified | chr3:108015183-108031517  | 14.335  |
| <b>Eea1</b>          | 0 | 0 | 0 | 585  | 9.75     | 2.7001   | 39.47311 | Stalled      | chr10:95401296-95508152   | 104.857 |
| <b>Eepd1</b>         | 0 | 0 | 0 | 186  | 3.1      | 1.34253  | 16.23116 | Stalled      | chr9:25287181-25411695    | 122.515 |
| <b>1700028P14Rik</b> | 0 | 0 | 0 | 60   | 1        | 0        | 0        | Unclassified | chr19:23633249-23729302   | 94.054  |
| <b>Zfp474</b>        | 0 | 0 | 0 | 17   | 0.283333 | 0.033203 | 0        | Unclassified | chr18:52773568-52799484   | 23.917  |
| <b>Fmr1nb</b>        | 0 | 0 | 0 | 10   | 0.166667 | 0        | 3.497077 | Unclassified | chrX:66013013-66057733    | 42.721  |
| <b>Gm266</b>         | 0 | 0 | 0 | 11   | 0.183333 | 0.179619 | 6        | Unclassified | chr12:112722821-112726034 | 1.214   |
| <b>Scpep1</b>        | 0 | 0 | 0 | 713  | 11.88333 | 37.3857  | 8.985278 | Unclassified | chr11:88785335-88818756   | 31.422  |
| <b>Erlec1</b>        | 0 | 0 | 0 | 329  | 5.483333 | 6.44172  | 37.95274 | Stalled      | chr11:30829783-30856131   | 24.349  |
| <b>4833422F24Rik</b> | 0 | 0 | 0 | 12   | 0.2      | 0.032762 | 1.081491 | Unclassified | chr2:165220949-165227894  | 4.946   |
| <b>4933415F23Rik</b> | 0 | 0 | 0 | 2    | 0.033333 | 0.258057 | 0        | Unclassified | chr1:23107312-23111092    | 1.781   |
| <b>Nle1</b>          | 0 | 0 | 0 | 556  | 9.266667 | 23.3942  | 4.083443 | Unclassified | chr11:82714270-82723897   | 7.628   |
| <b>Rtkn2</b>         | 0 | 0 | 0 | 141  | 2.35     | 0.746333 | 8.470179 | Unclassified | chr10:67440345-67506612   | 64.268  |
| <b>Adck5</b>         | 0 | 0 | 0 | 452  | 7.533333 | 6.96143  | 5.040491 | Unclassified | chr15:76404788-76426241   | 19.454  |
| <b>Gm6812</b>        | 0 | 0 | 0 | 1    | 0.016667 | 0        | 0        | Unclassified | chrX:66145547-66148228    | 0.682   |
| <b>Sic35a3</b>       | 0 | 0 | 0 | 388  | 6.466667 | 3.1578   | 19.42199 | Unclassified | chr3:116373715-116417198  | 41.484  |
| <b>Tmem135</b>       | 0 | 0 | 0 | 856  | 14.26667 | 5.05855  | 30.00148 | Stalled      | chr7:96288230-96489297    | 199.068 |
| <b>4930555I21Rik</b> | 0 | 0 | 0 | 93   | 1.55     | 0.07539  | 1.287451 | Unclassified | chr4:135049901-135093718  | 41.818  |
| <b>Aox1</b>          | 0 | 0 | 0 | 93   | 1.55     | 0.035016 | 4.98161  | Unclassified | chr1:58084812-58163254    | 76.443  |
| <b>Fam117b</b>       | 0 | 0 | 0 | 528  | 8.8      | 4.54825  | 28.08586 | Stalled      | chr1:59967849-60042190    | 72.342  |
| <b>2010007H12Rik</b> | 0 | 0 | 0 | 296  | 4.933333 | 22.6128  | 3.092435 | Unclassified | chr5:138218145-138221335  | 1.191   |
| <b>Pcdh19</b>        | 0 | 0 | 0 | 31   | 0.516667 | 0.214917 | 2.369057 | Unclassified | chrX:130117399-130225532  | 106.134 |
| <b>Cdkn2b</b>        | 0 | 0 | 0 | 207  | 3.45     | 4.08426  | 3.133891 | Unclassified | chr4:88952197-88958941    | 4.745   |
| <b>Selenbp1</b>      | 0 | 0 | 0 | 29   | 0.483333 | 1.48892  | 8.865895 | Unclassified | chr3:94735004-94748680    | 11.677  |
| <b>Hif1a</b>         | 0 | 0 | 0 | 686  | 11.43333 | 8.75767  | 33.40335 | Unclassified | chr12:75006853-75048516   | 39.664  |
| <b>Cdkn1c</b>        | 0 | 0 | 0 | 17   | 0.283333 | 0.694025 | 3.630573 | Unclassified | chr7:150644246-150648955  | 2.71    |
| <b>Exosc10</b>       | 0 | 0 | 0 | 1458 | 24.3     | 21.7021  | 7.312594 | Unclassified | chr4:147930535-147956507  | 23.973  |
| <b>Pld6</b>          | 0 | 0 | 0 | 38   | 0.633333 | 1.0468   | 1.679247 | Unclassified | chr11:59597394-59603159   | 3.766   |
| <b>Olfr872</b>       | 0 | 0 | 0 | 13   | 0.216667 | 0        | 0        | Unclassified | chr9:20039605-20065357    | 23.753  |
| <b>Exosc9</b>        | 0 | 0 | 0 | 415  | 6.916667 | 15.4197  | 7.353636 | Unclassified | chr3:36449527-36446469    | 13.123  |
| <b>Olig1</b>         | 0 | 0 | 0 | 10   | 0.166667 | 0.076745 | 0.842761 | Unclassified | chr16:91268013-91272184   | 2.172   |
| <b>Grb14</b>         | 0 | 0 | 0 | 85   | 1.416667 | 0.652895 | 5.337195 | Unclassified | chr2:64750539-64862823    | 110.285 |
| <b>Qtrt1</b>         | 0 | 0 | 0 | 353  | 5.883333 | 18.5852  | 9.843289 | Unclassified | chr9:21214280-21224723    | 8.444   |
| <b>Mapk14</b>        | 0 | 0 | 0 | 881  | 14.68333 | 13.7864  | 17.40037 | Unclassified | chr17:28826286-28885349   | 57.064  |
| <b>Myadm</b>         | 0 | 0 | 0 | 449  | 7.483333 | 18.5234  | 2.029648 | Elongating   | chr7:3287038-3299350      | 10.313  |
| <b>Skint3</b>        | 0 | 0 | 0 | 23   | 0.383333 | 0.017668 | 0        | Unclassified | chr4:111902849-111973073  | 68.225  |
| <b>Olfr1086</b>      | 0 | 0 | 0 | 0    | 0        | 0        | 0        | Unclassified | chr2:86516555-86519488    | 0.934   |
| <b>Olfr1111</b>      | 0 | 0 | 0 | 0    | 0        | 0.027327 | 0        | Unclassified | chr2:86989878-86992816    | 0.939   |
| <b>Prkag1</b>        | 0 | 0 | 0 | 421  | 7.016667 | 13.2295  | 17.83575 | Unclassified | chr15:98643227-98663939   | 18.713  |
| <b>Rgs9</b>          | 0 | 0 | 0 | 132  | 2.2      | 0.510763 | 4.945051 | Unclassified | chr11:109086668-109161495 | 72.828  |
| <b>Kcne1</b>         | 0 | 0 | 0 | 22   | 0.366667 | 0.012187 | 0.384028 | Unclassified | chr16:92346245-92361713   | 13.469  |
| <b>Prkar1a</b>       | 0 | 0 | 0 | 794  | 13.23333 | 64.2639  | 13.26384 | Unclassified | chr11:109510262-109530962 | 18.701  |

|               |   |   |   |      |          |          |          |              |                           |         |
|---------------|---|---|---|------|----------|----------|----------|--------------|---------------------------|---------|
| Rgs2          | 0 | 0 | 0 | 205  | 3.416667 | 3.32583  | 29.75119 | Stalled      | chr1:145846467-145853279  | 4.813   |
| Kcnd1         | 0 | 0 | 0 | 19   | 0.316667 | 0.288302 | 1.076724 | Unclassified | chrX:7398968-7413629      | 12.662  |
| Rgs5          | 0 | 0 | 0 | 34   | 0.566667 | 0.056678 | 0        | Unclassified | chr1:171583631-171623657  | 38.027  |
| Prkar2b       | 0 | 0 | 0 | 245  | 4.083333 | 1.34123  | 15.83117 | Stalled      | chr12:32643343-32748144   | 102.802 |
| Rgl1          | 0 | 0 | 0 | 348  | 5.8      | 1.01527  | 8.69892  | Unclassified | chr1:154364659-154474241  | 107.583 |
| Kcnc1         | 0 | 0 | 0 | 137  | 2.283333 | 0.321102 | 1.715819 | Unclassified | chr7:53649837-53694074    | 42.238  |
| Rgn           | 0 | 0 | 0 | 4    | 0.066667 | 0        | 0        | Unclassified | chrX:20124943-20139213    | 12.271  |
| Retnlg        | 0 | 0 | 0 | 2    | 0.033333 | 0.084457 | 0        | Unclassified | chr16:48870720-48874610   | 1.891   |
| Prpf18        | 0 | 0 | 0 | 391  | 6.516667 | 11.552   | 10.07827 | Unclassified | chr2:4543212-4575132      | 29.921  |
| 8030411F24Rik | 0 | 0 | 0 | 2    | 0.033333 | 0.1706   | 0.745482 | Unclassified | chr2:148605744-148611672  | 3.929   |
| Zfand5        | 0 | 0 | 0 | 716  | 11.93333 | 7.71128  | 28.63754 | Unclassified | chr19:21344767-21356779   | 10.013  |
| Itgb1         | 0 | 0 | 0 | 104  | 1.733333 | 0.02175  | 0        | Unclassified | chr14:124057361-124373301 | 313.941 |
| Cel           | 0 | 0 | 0 | 66   | 1.1      | 0.025155 | 0.733303 | Unclassified | chr2:28411339-28420882    | 7.544   |
| Zfp27         | 0 | 0 | 0 | 280  | 4.666667 | 2.05345  | 16.63014 | Unclassified | chr7:30678355-30693123    | 12.769  |
| Zfp26         | 0 | 0 | 0 | 644  | 10.73333 | 1.0298   | 14.12459 | Unclassified | chr9:20232761-20266604    | 31.844  |
| Lyz16         | 0 | 0 | 0 | 12   | 0.2      | 0        | 0.985581 | Unclassified | chr11:103492388-103502188 | 7.801   |
| Sell          | 0 | 0 | 0 | 400  | 6.666667 | 12.7116  | 2.852262 | Elongating   | chr1:165990206-166010915  | 18.71   |
| Prdx6-rs1     | 0 | 0 | 0 | 1    | 0.016667 | 0.844804 | 1        | Unclassified | chr2:80130628-80135513    | 2.886   |
| D1Bwg0212e    | 0 | 0 | 0 | 338  | 5.633333 | 9.65959  | 15.37178 | Unclassified | chr1:39590646-39603722    | 11.077  |
| Cyp3a59       | 0 | 0 | 0 | 14   | 0.233333 | 0.02561  | 0.717557 | Unclassified | chr5:146888833-146924859  | 34.027  |
| Vmn2r1        | 0 | 0 | 0 | 13   | 0.216667 | 0.044038 | 0        | Unclassified | chr3:63883563-63909380    | 23.818  |
| Prss21        | 0 | 0 | 0 | 7    | 0.116667 | 0.0357   | 1.005346 | Unclassified | chr17:24003038-24010080   | 5.043   |
| Habp4         | 0 | 0 | 0 | 230  | 3.833333 | 4.26488  | 23.54418 | Stalled      | chr13:64261173-64287845   | 24.673  |
| 4931440L10Rik | 0 | 0 | 0 | 3    | 0.05     | 0.066015 | 0.835472 | Unclassified | chr1:136437522-136445599  | 6.078   |
| Svs1          | 0 | 0 | 0 | 11   | 0.183333 | 0        | 0.600637 | Unclassified | chr6:48934859-48941721    | 4.863   |
| Mettl11b      | 0 | 0 | 0 | 11   | 0.183333 | 0.024343 | 0.679908 | Unclassified | chr1:165633123-165657363  | 22.241  |
| C130079G13Rik | 0 | 0 | 0 | 7    | 0.116667 | 0.018381 | 0        | Unclassified | chr3:59727135-59741871    | 12.737  |
| Mylk2         | 0 | 0 | 0 | 13   | 0.216667 | 0.065212 | 0        | Unclassified | chr2:152735087-152748801  | 11.715  |
| Tnfsf18       | 0 | 0 | 0 | 40   | 0.666667 | 0.161603 | 0.863307 | Unclassified | chr1:163422787-163435419  | 10.633  |
| Cypr1         | 0 | 0 | 0 | 51   | 0.85     | 0.195428 | 0        | Unclassified | chr16:85456489-85552618   | 94.13   |
| Asb4          | 0 | 0 | 0 | 57   | 0.95     | 0.074128 | 0.996282 | Unclassified | chr6:5331385-5383021      | 49.637  |
| Dpysl5        | 0 | 0 | 0 | 124  | 2.066667 | 0.229729 | 2.167579 | Unclassified | chr5:31012267-31101742    | 87.476  |
| Asb3          | 0 | 0 | 0 | 682  | 11.36667 | 2.63071  | 52.39274 | Stalled      | chr11:30852397-31002704   | 148.308 |
| Tas2r105      | 0 | 0 | 0 | 0    | 0        | 0.028386 | 0        | Unclassified | chr6:131636578-131639481  | 0.904   |
| Olfr519       | 0 | 0 | 0 | 1    | 0.016667 | 0        | 0        | Unclassified | chr7:116036974-116039919  | 0.946   |
| Rora          | 0 | 0 | 0 | 743  | 12.38333 | 0.194895 | 0.494277 | Unclassified | chr9:68499608-69226835    | 725.228 |
| AI854703      | 0 | 0 | 0 | 101  | 1.683333 | 0.677942 | 0.160536 | Unclassified | chr6:48576165-48583687    | 5.523   |
| Rom1          | 0 | 0 | 0 | 297  | 4.95     | 6.69325  | 7.64624  | Unclassified | chr19:9001871-9005846     | 1.976   |
| C2cd3         | 0 | 0 | 0 | 926  | 15.43333 | 6.03565  | 23.90523 | Unclassified | chr7:107518742-107618668  | 97.927  |
| Gm8909        | 0 | 0 | 0 | 8    | 0.133333 | 0        | 0.459557 | Unclassified | chr17:36301917-36307467   | 3.551   |
| Ros1          | 0 | 0 | 0 | 81   | 1.35     | 0.02078  | 0        | Unclassified | chr10:51765731-51917050   | 149.32  |
| Rorc          | 0 | 0 | 0 | 47   | 0.783333 | 0.015361 | 2.27416  | Unclassified | chr3:94174747-94202161    | 25.415  |
| Ppp2r2a       | 0 | 0 | 0 | 1334 | 22.23333 | 14.7972  | 12.33321 | Unclassified | chr14:67634507-67693266   | 56.76   |
| Trp63         | 0 | 0 | 0 | 131  | 2.183333 | 0.064914 | 0        | Unclassified | chr16:25681850-25892174   | 208.325 |
| Gm732         | 0 | 0 | 0 | 0    | 0        | 0        | 0        | Unclassified | chrX:105141073-105145775  | 2.703   |
| Trpc5         | 0 | 0 | 0 | 120  | 2        | 0.021576 | 2.169252 | Unclassified | chrX:140816213-141124723  | 306.511 |
| Lrrc61        | 0 | 0 | 0 | 186  | 3.1      | 3.42067  | 19.31096 | Stalled      | chr6:48502797-48520721    | 15.925  |
| Capsl         | 0 | 0 | 0 | 72   | 1.2      | 0.338698 | 0        | Unclassified | chr15:9363782-9395790     | 30.009  |
| Foxf1a        | 0 | 0 | 0 | 13   | 0.216667 | 0.162905 | 0.520436 | Unclassified | chr8:123606373-123610779  | 2.407   |
| Lrrc40        | 0 | 0 | 0 | 465  | 7.75     | 4.71312  | 39.57057 | Unclassified | chr3:157697666-157731442  | 31.777  |
| Dnal1         | 0 | 0 | 0 | 309  | 5.15     | 0.248906 | 0.320873 | Unclassified | chr4:124732582-124744901  | 10.32   |
| Ep400         | 0 | 0 | 0 | 2248 | 37.46667 | 14.7149  | 23.47439 | Unclassified | chr5:111093391-111201736  | 106.346 |
| Butr1         | 0 | 0 | 0 | 20   | 0.333333 | 1.37036  | 0.345264 | Unclassified | chr11:58729558-58740467   | 8.91    |
| Ash11         | 0 | 0 | 0 | 1045 | 17.41667 | 5.11279  | 0.689637 | Unclassified | chr3:88767733-88883297    | 113.565 |
| Pkhd11        | 0 | 0 | 0 | 53   | 0.883333 | 0.057318 | 0.73099  | Unclassified | chr15:44287098-44428681   | 139.584 |
| Med9          | 0 | 0 | 0 | 683  | 11.38333 | 12.7018  | 4.464595 | Unclassified | chr11:59759715-59776808   | 15.094  |
| Tbc1d12       | 0 | 0 | 0 | 282  | 4.7      | 1.48874  | 36.84904 | Stalled      | chr19:38909068-38994413   | 83.346  |
| Lcn9          | 0 | 0 | 0 | 8    | 0.133333 | 0.030551 | 0.580889 | Unclassified | chr2:25676672-25681057    | 2.386   |
| Olfr222       | 0 | 0 | 0 | 3    | 0.05     | 0.026784 | 2        | Unclassified | chr11:59384283-59387240   | 0.958   |
| Acb5          | 0 | 0 | 0 | 61   | 1.016667 | 0.16537  | 0.623239 | Unclassified | chr12:120106297-120206894 | 98.598  |
| Cd4           | 0 | 0 | 0 | 39   | 0.65     | 0.086961 | 0        | Unclassified | chr6:124814710-124840227  | 23.518  |
| Usp44         | 0 | 0 | 0 | 173  | 2.883333 | 0.883134 | 1.627362 | Elongating   | chr10:93292299-93311283   | 16.985  |
| Foxo6         | 0 | 0 | 0 | 54   | 0.9      | 0.272268 | 0.910897 | Unclassified | chr4:119939682-119961866  | 20.185  |
| Gm7073        | 0 | 0 | 0 | 2    | 0.033333 | 0        | 0.95036  | Unclassified | chrX:57689226-57711370    | 20.145  |
| Gpa33         | 0 | 0 | 0 | 70   | 1.166667 | 0.033536 | 0.680278 | Unclassified | chr1:168058590-168096641  | 36.052  |
| Cd59a         | 0 | 0 | 0 | 36   | 0.6      | 1.17484  | 7.699523 | Unclassified | chr2:103933957-103955508  | 19.552  |
| Tlx2          | 0 | 0 | 0 | 19   | 0.316667 | 0.428998 | 0.413686 | Unclassified | chr6:83018318-83022219    | 1.902   |
| Tlx1          | 0 | 0 | 0 | 23   | 0.383333 | 0.120015 | 0.940933 | Unclassified | chr19:45223204-45231432   | 6.229   |
| Wbscr17       | 0 | 0 | 0 | 351  | 5.85     | 0.048871 | 1.667221 | Unclassified | chr5:131350820-131785392  | 432.573 |
| Tnpo2         | 0 | 0 | 0 | 1078 | 17.96667 | 17.0863  | 4.881949 | Unclassified | chr8:87558813-87581481    | 20.669  |
| BC016579      | 0 | 0 | 0 | 23   | 0.383333 | 0.222181 | 1.740944 | Unclassified | chr16:45626960-45656231   | 27.272  |
| Gng10         | 0 | 0 | 0 | 271  | 4.516667 | 29.2671  | 9.204352 | Unclassified | chr4:59046027-59054771    | 6.745   |
| Nr2e1         | 0 | 0 | 0 | 32   | 0.533333 | 0.17839  | 1.355948 | Unclassified | chr10:42281776-42305394   | 21.619  |
| Otop1         | 0 | 0 | 0 | 35   | 0.583333 | 0.085415 | 1.38753  | Unclassified | chr5:38666642-38695456    | 26.815  |
| Il1rl1        | 0 | 0 | 0 | 19   | 0.316667 | 0.072065 | 0        | Unclassified | chr1:40494493-40522259    | 25.767  |
| Krt24         | 0 | 0 | 0 | 11   | 0.183333 | 0.166939 | 1.116085 | Unclassified | chr11:99141406-99148552   | 5.147   |
| Sfrs9         | 0 | 0 | 0 | 435  | 7.25     | 61.9217  | 6.422029 | Unclassified | chr5:115775185-115783089  | 5.905   |
| Eif4b         | 0 | 0 | 0 | 1243 | 20.71667 | 95.4197  | 6.309686 | Unclassified | chr15:101902203-101927604 | 23.402  |
| Chrn4         | 0 | 0 | 0 | 38   | 0.633333 | 0.167277 | 1.539194 | Unclassified | chr9:54875962-54898351    | 20.39   |
| Olfm12b       | 0 | 0 | 0 | 114  | 1.9      | 0.915041 | 6.053265 | Unclassified | chr1:172572662-172612920  | 38.259  |
| Tmod2         | 0 | 0 | 0 | 66   | 1.1      | 0.107501 | 0.853923 | Unclassified | chr9:75413428-75461132    | 45.705  |
| Nme6          | 0 | 0 | 0 | 310  | 5.166667 | 10.3944  | 21.55761 | Unclassified | chr9:109733307-109745475  | 10.169  |
| Cyp4x1        | 0 | 0 | 0 | 25   | 0.416667 | 0.042048 | 1.027422 | Unclassified | chr4:114781286-114808582  | 25.297  |
| E4f1          | 0 | 0 | 0 | 464  | 7.733333 | 8.37855  | 19.35921 | Unclassified | chr17:24580723-24594256   | 11.534  |
| Idh2          | 0 | 0 | 0 | 310  | 5.166667 | 25.0554  | 13.25053 | Unclassified | chr7:87239735-87262236    | 20.502  |
| Ereg          | 0 | 0 | 0 | 18   | 0.3      | 0.009296 | 3.105669 | Unclassified | chr5:91501642-91522675    | 19.034  |

|               |   |   |   |      |           |          |          |              |                           |         |
|---------------|---|---|---|------|-----------|----------|----------|--------------|---------------------------|---------|
| Ssfa2         | 0 | 0 | 0 | 540  | 9         | 4.30996  | 21.44391 | Unclassified | chr2:79473581-79513121    | 37.541  |
| Amelx         | 0 | 0 | 0 | 4    | 0.066667  | 0        | 0        | Unclassified | chrX:165614045-165627141  | 11.097  |
| Ap4e1         | 0 | 0 | 0 | 475  | 7.916667  | 3.87304  | 21.40573 | Unclassified | chr2:126832446-126895550  | 61.105  |
| Ube4b         | 0 | 0 | 0 | 866  | 14.433333 | 12.1442  | 12.25011 | Unclassified | chr4:148702524-148802740  | 98.217  |
| Sic29a1       | 0 | 0 | 0 | 116  | 1.933333  | 6.92307  | 0.809182 | Unclassified | chr17:45722170-45731342   | 7.173   |
| Gm6086        | 0 | 0 | 0 | 9    | 0.15      | 0.068763 | 0        | Unclassified | chr1:95885085-95908116    | 21.032  |
| Lsm1          | 0 | 0 | 0 | 543  | 9.05      | 3.77929  | 35.28441 | Unclassified | chr8:26894062-26914447    | 18.386  |
| Smoc2         | 0 | 0 | 0 | 149  | 2.483333  | 0.049781 | 1.394978 | Unclassified | chr17:14414512-14541797   | 125.286 |
| Smoc1         | 0 | 0 | 0 | 145  | 2.416667  | 0.392412 | 0.527622 | Unclassified | chr12:82125794-82287400   | 159.607 |
| Ankrd43       | 0 | 0 | 0 | 12   | 0.2       | 1.02719  | 0.493267 | Unclassified | chr11:53290079-53295697   | 3.619   |
| Sprr2j-ps     | 0 | 0 | 0 | 3    | 0.05      | 0        | 1        | Unclassified | chr3:92220008-92223318    | 1.311   |
| Sprr2k        | 0 | 0 | 0 | 2    | 0.033333  | 0        | 0        | Unclassified | chr3:92234503-92237849    | 1.347   |
| D10Ert610e    | 0 | 0 | 0 | 68   | 1.133333  | 0.576149 | 4.217557 | Unclassified | chr10:126619577-126629110 | 7.534   |
| Sprr2i        | 0 | 0 | 0 | 3    | 0.05      | 0.014634 | 0        | Unclassified | chr3:92209912-92213193    | 1.282   |
| Sprr2f        | 0 | 0 | 0 | 2    | 0.033333  | 0        | 0        | Unclassified | chr3:92167108-92170364    | 1.257   |
| Echdc1        | 0 | 0 | 0 | 300  | 5         | 4.69993  | 30.84845 | Stalled      | chr10:29030971-29066467   | 33.497  |
| Alg11         | 0 | 0 | 0 | 277  | 4.616667  | 2.6357   | 16.90571 | Unclassified | chr8:23169191-23178761    | 7.571   |
| Creg2         | 0 | 0 | 0 | 58   | 0.966667  | 0.333601 | 1.517248 | Unclassified | chr1:39675250-39710027    | 32.778  |
| Zfp507        | 0 | 0 | 0 | 820  | 13.66667  | 4.79568  | 7.58464  | Unclassified | chr7:36557368-36590008    | 30.641  |
| Gm4745        | 0 | 0 | 0 | 1    | 0.016667  | 0        | 0        | Unclassified | chr7:15243056-15251345    | 6.29    |
| Gm13242       | 0 | 0 | 0 | 9    | 0.15      | 0        | 0        | Unclassified | chr4:145258599-145294340  | 33.742  |
| Pkd1l3        | 0 | 0 | 0 | 514  | 8.566667  | 1.07445  | 7.048269 | Unclassified | chr8:112136416-112196492  | 58.077  |
| Rpf1          | 0 | 0 | 0 | 601  | 10.01667  | 20.5485  | 10.5154  | Unclassified | chr3:146169309-146186387  | 15.079  |
| Plod2         | 0 | 0 | 0 | 88   | 1.466667  | 0.668849 | 13.53984 | Stalled      | chr9:92435060-92503258    | 66.199  |
| Mapkapk5      | 0 | 0 | 0 | 499  | 8.316667  | 12.8244  | 14.14077 | Unclassified | chr5:121975059-121997901  | 20.843  |
| Rapsn         | 0 | 0 | 0 | 42   | 0.7       | 0.189871 | 1.815406 | Unclassified | chr2:90873783-90885886    | 10.104  |
| C1ql3         | 0 | 0 | 0 | 23   | 0.383333  | 0.265216 | 0.665499 | Unclassified | chr2:12923513-12934491    | 8.979   |
| AI428936      | 0 | 0 | 0 | 51   | 0.85      | 0.615259 | 4.31275  | Unclassified | chr7:31097834-31104064    | 4.231   |
| Usp7          | 0 | 0 | 0 | 2300 | 38.333333 | 28.2785  | 2.771347 | Elongating   | chr16:8688814-8740435     | 49.622  |
| Mios          | 0 | 0 | 0 | 505  | 8.416667  | 4.74967  | 20.6539  | Unclassified | chr6:8157226-8186271      | 27.046  |
| Sic16a2       | 0 | 0 | 0 | 57   | 0.95      | 0.443791 | 2.099538 | Unclassified | chrX:100892752-101019327  | 124.576 |
| Sic16a7       | 0 | 0 | 0 | 73   | 1.216667  | 0.201331 | 0.584922 | Unclassified | chr10:124664540-124767591 | 101.052 |
| Sic13a2       | 0 | 0 | 0 | 55   | 0.916667  | 0.064345 | 1.662541 | Unclassified | chr11:78210777-78237687   | 24.911  |
| Sic16a1       | 0 | 0 | 0 | 920  | 15.333333 | 9.54613  | 21.71401 | Unclassified | chr3:104440590-104462385  | 19.796  |
| Sic17a1       | 0 | 0 | 0 | 29   | 0.483333  | 0.070844 | 0        | Unclassified | chr13:23960141-23987598   | 25.458  |
| Gm9897        | 0 | 0 | 0 | 33   | 0.55      | 1.14067  | 0        | Unclassified | chr5:4190366-4197651      | 5.286   |
| Zp3           | 0 | 0 | 0 | 13   | 0.216667  | 0.058389 | 0        | Unclassified | chr5:136453974-136464494  | 8.521   |
| Tnk1          | 0 | 0 | 0 | 70   | 1.166667  | 0.066376 | 0.095372 | Unclassified | chr11:69664064-69674232   | 8.169   |
| Cenpq         | 0 | 0 | 0 | 186  | 3.1       | 6.29188  | 23.59811 | Stalled      | chr17:41060003-41073500   | 11.498  |
| Nedd4l        | 0 | 0 | 0 | 1171 | 19.51667  | 1.28201  | 7.91543  | Unclassified | chr18:65045409-65377480   | 330.072 |
| Asah2         | 0 | 0 | 0 | 231  | 3.85      | 0.876897 | 2.776818 | Unclassified | chr19:32059140-32179630   | 118.491 |
| Trim40        | 0 | 0 | 0 | 20   | 0.333333  | 0.115026 | 0.853803 | Unclassified | chr17:37018542-37028990   | 8.449   |
| Zp2           | 0 | 0 | 0 | 6    | 0.1       | 0.023302 | 0        | Unclassified | chr7:127275874-127290804  | 12.931  |
| Mtmr9         | 0 | 0 | 0 | 411  | 6.85      | 11.5101  | 17.72707 | Unclassified | chr14:64142446-64164790   | 20.345  |
| I11f6         | 0 | 0 | 0 | 6    | 0.1       | 0        | 0.698931 | Unclassified | chr2:24068936-24081221    | 10.286  |
| Skint1        | 0 | 0 | 0 | 14   | 0.233333  | 0        | 0        | Unclassified | chr4:111676873-111702143  | 23.271  |
| Hes3          | 0 | 0 | 0 | 20   | 0.333333  | 0.210219 | 0.226754 | Unclassified | chr4:151660080-151667771  | 5.692   |
| Txnrd3        | 0 | 0 | 0 | 331  | 5.516667  | 1.75331  | 19.96342 | Unclassified | chr6:89591981-89625523    | 31.543  |
| Nfatc2ip      | 0 | 0 | 0 | 309  | 5.15      | 6.67136  | 15.31317 | Unclassified | chr7:133526367-133542251  | 13.885  |
| Xoc6b         | 0 | 0 | 0 | 410  | 6.833333  | 1.59494  | 15.23622 | Stalled      | chr6:84568480-85021507    | 451.028 |
| 4921521F21Rik | 0 | 0 | 0 | 20   | 0.333333  | 0        | 1.142787 | Unclassified | chr1:65059659-65081322    | 19.664  |
| Spata16       | 0 | 0 | 0 | 201  | 3.35      | 0.082685 | 0        | Unclassified | chr3:26534552-26882134    | 345.583 |
| Dpp10         | 0 | 0 | 0 | 311  | 5.183333  | 0.024918 | 1.396328 | Unclassified | chr1:125228715-125944136  | 713.422 |
| Nlrp9a        | 0 | 0 | 0 | 12   | 0.2       | 0.006143 | 0.77589  | Unclassified | chr7:27318083-27359165    | 39.083  |
| Prelp         | 0 | 0 | 0 | 12   | 0.2       | 0.03205  | 1.586091 | Unclassified | chr1:135806883-135819978  | 11.096  |
| Lap3          | 0 | 0 | 0 | 372  | 6.2       | 15.6625  | 9.811682 | Unclassified | chr5:45882612-45903930    | 19.319  |
| Sic22a13      | 0 | 0 | 0 | 19   | 0.316667  | 0.131211 | 0.470768 | Unclassified | chr9:119102102-119120223  | 16.122  |
| Edaradd       | 0 | 0 | 0 | 199  | 3.316667  | 5.05275  | 9.106212 | Unclassified | chr13:12569174-12614715   | 43.542  |
| Fosb          | 0 | 0 | 0 | 126  | 2.1       | 2.03621  | 2.50283  | Elongating   | chr7:19888044-19897394    | 7.351   |
| Fosl1         | 0 | 0 | 0 | 215  | 3.583333  | 1.99342  | 1.928372 | Elongating   | chr19:5445697-5455938     | 8.242   |
| Paf1          | 0 | 0 | 0 | 432  | 7.2       | 31.2528  | 13.01511 | Unclassified | chr7:29176014-29184402    | 6.389   |
| 1700023I07Rik | 0 | 0 | 0 | 0    | 0         | 0        | 0        | Unclassified | chrX:22036757-22039524    | 0.768   |
| Gzma          | 0 | 0 | 0 | 7    | 0.116667  | 2.0432   | 1.103621 | Unclassified | chr13:113884034-113893189 | 7.156   |
| Fpr2          | 0 | 0 | 0 | 8    | 0.133333  | 0.138401 | 0        | Unclassified | chr17:18022787-18030916   | 6.13    |
| Gabra4        | 0 | 0 | 0 | 32   | 0.533333  | 0.080821 | 1.51547  | Unclassified | chr5:71960972-72051547    | 88.576  |
| Zfp664        | 0 | 0 | 0 | 308  | 5.133333  | 7.77202  | 16.39872 | Unclassified | chr5:125341074-125369000  | 25.927  |
| Gpatch8       | 0 | 0 | 0 | 921  | 15.35     | 7.96799  | 29.18464 | Unclassified | chr11:102337231-102419472 | 80.242  |
| BC048599      | 0 | 0 | 0 | 2    | 0.033333  | 0.038955 | 0        | Unclassified | chr6:40845260-40852386    | 5.127   |
| Aoc2          | 0 | 0 | 0 | 423  | 7.05      | 3.10611  | 2.380225 | Elongating   | chr11:101184376-101191008 | 4.633   |
| Ptpn9         | 0 | 0 | 0 | 514  | 8.566667  | 5.84628  | 21.6732  | Stalled      | chr9:56840774-56910614    | 67.841  |
| Apln          | 0 | 0 | 0 | 7    | 0.116667  | 0.199379 | 2.439671 | Unclassified | chrX:45378322-45390029    | 9.708   |
| Pgc           | 0 | 0 | 0 | 21   | 0.35      | 0.037041 | 0.517825 | Unclassified | chr17:47861790-47871427   | 7.638   |
| Flg2          | 0 | 0 | 0 | 15   | 0.25      | 0.016699 | 0        | Unclassified | chr3:92999194-93025298    | 24.105  |
| 1700027A23Rik | 0 | 0 | 0 | 13   | 0.216667  | 2.56891  | 5.752075 | Unclassified | chr3:105799874-105806415  | 4.542   |
| 1700028K03Rik | 0 | 0 | 0 | 37   | 0.616667  | 7.68514  | 1.160392 | Unclassified | chr5:107961729-107977396  | 13.668  |
| Gm4858        | 0 | 0 | 0 | 1    | 0.016667  | 0.065184 | 1        | Unclassified | chr3:92870744-92879427    | 6.684   |
| Olfr196       | 0 | 0 | 0 | 2    | 0.033333  | 0.023457 | 0        | Unclassified | chr16:59167037-59169967   | 0.931   |
| Afgf2         | 0 | 0 | 0 | 426  | 7.1       | 11.9661  | 10.35396 | Unclassified | chr5:138092081-138127845  | 33.765  |
| Prss8         | 0 | 0 | 0 | 84   | 1.4       | 0.042009 | 0.216349 | Unclassified | chr7:135069236-135075627  | 4.392   |
| Snta1         | 0 | 0 | 0 | 85   | 1.416667  | 1.09664  | 6.234996 | Unclassified | chr2:154202049-154235820  | 31.772  |
| Gm5124        | 0 | 0 | 0 | 7    | 0.116667  | 3.71069  | 3.669859 | Unclassified | chrX:20935990-20941748    | 3.759   |
| Pecr          | 0 | 0 | 0 | 232  | 3.866667  | 6.71482  | 9.75717  | Unclassified | chr1:72305748-72332888    | 25.141  |
| Trim60        | 0 | 0 | 0 | 25   | 0.416667  | 0.089663 | 0.422049 | Unclassified | chr8:67523951-67544476    | 18.526  |
| 94300700I3Rik | 0 | 0 | 0 | 23   | 0.383333  | 0.0833   | 0        | Unclassified | chr1:158295059-158332121  | 35.063  |
| Dbn1d1        | 0 | 0 | 0 | 312  | 5.2       | 0.515929 | 0.257265 | Unclassified | chr8:126029587-126041355  | 9.769   |
| Iigp          | 0 | 0 | 0 | 17   | 0.283333  | 4.00528  | 0        | Unclassified | chr11:48759651-48794883   | 33.233  |

|               |   |   |   |      |          |          |          |              |                           |         |
|---------------|---|---|---|------|----------|----------|----------|--------------|---------------------------|---------|
| Mettl2        | 0 | 0 | 0 | 452  | 7.533333 | 8.74683  | 8.677843 | Unclassified | chr11:104985738-105002459 | 14.722  |
| Ip6k3         | 0 | 0 | 0 | 43   | 0.716667 | 0.122325 | 1.08902  | Unclassified | chr17:27280915-27306709   | 23.795  |
| Gm13177       | 0 | 0 | 0 | 8    | 0.333333 | 0        | 0.553941 | Unclassified | chr4:144201609-144213301  | 9.693   |
| Pbld          | 0 | 0 | 0 | 20   | 0.333333 | 0.023032 | 0.93487  | Unclassified | chr10:62522364-62540284   | 15.921  |
| BC048562      | 0 | 0 | 0 | 27   | 0.45     | 0.037311 | 0.263871 | Unclassified | chr9:108336812-108348414  | 9.603   |
| 6330416L07Rik | 0 | 0 | 0 | 248  | 4.133333 | 4.07061  | 5.509235 | Unclassified | chr17:22474955-22500367   | 23.413  |
| BY080835      | 0 | 0 | 0 | 282  | 4.7      | 0.302748 | 1.352509 | Elongating   | chr9:107495397-107501406  | 4.01    |
| Atp6v0d2      | 0 | 0 | 0 | 51   | 0.85     | 0.066565 | 0.472184 | Unclassified | chr4:19803984-19851713    | 45.73   |
| Slc2a7        | 0 | 0 | 0 | 40   | 0.666667 | 0.056853 | 1.410116 | Unclassified | chr4:149521080-149542591  | 19.512  |
| 5730410E15Rik | 0 | 0 | 0 | 80   | 1.333333 | 0.092046 | 0.59629  | Unclassified | chr15:44503402-44621609   | 116.208 |
| Herc4         | 0 | 0 | 0 | 865  | 14.41667 | 5.98004  | 39.61274 | Unclassified | chr10:62704732-62780625   | 73.894  |
| Tctex1d1      | 0 | 0 | 0 | 14   | 0.233333 | 0.013463 | 0.669324 | Unclassified | chr4:102656983-102678199  | 19.217  |
| Olfr357       | 0 | 0 | 0 | 0    | 0        | 0        | 0        | Unclassified | chr2:36850331-36853258    | 0.928   |
| Spata21       | 0 | 0 | 0 | 376  | 6.266667 | 0.0561   | 0.237475 | Unclassified | chr4:140642259-140668674  | 24.416  |
| Brix1         | 0 | 0 | 0 | 639  | 10.65    | 16.2963  | 16.42127 | Unclassified | chr15:10404533-10417692   | 11.16   |
| 1700065I17Rik | 0 | 0 | 0 | 73   | 1.216667 | 0        | 4.293286 | Unclassified | chr18:56746001-56754433   | 6.433   |
| Frem1         | 0 | 0 | 0 | 89   | 1.483333 | 0.024787 | 0        | Unclassified | chr4:82543830-82669006    | 123.177 |
| Olfr982       | 0 | 0 | 0 | 4    | 0.066667 | 0.05307  | 1        | Unclassified | chr9:39879881-39882847    | 0.967   |
| Pvrl1         | 0 | 0 | 0 | 171  | 2.85     | 0.488747 | 2.666432 | Unclassified | chr9:43550658-43615544    | 62.887  |
| Gm4984        | 0 | 0 | 0 | 10   | 0.166667 | 0.040958 | 6        | Unclassified | chrX:12227008-12229946    | 0.939   |
| Gm14160       | 0 | 0 | 0 | 9    | 0.15     | 0.03107  | 0        | Unclassified | chr2:151471139-151496269  | 23.131  |
| Zfp473        | 0 | 0 | 0 | 200  | 3.333333 | 0.82523  | 14.67608 | Stalled      | chr7:51986855-52005987    | 17.133  |
| Olfr921       | 0 | 0 | 0 | 2    | 0.033333 | 0        | 2        | Unclassified | chr9:38578672-38583939    | 3.268   |
| Galr1         | 0 | 0 | 0 | 17   | 0.283333 | 0.071425 | 0        | Unclassified | chr18:82561887-82578169   | 14.283  |
| Galnt3        | 0 | 0 | 0 | 45   | 0.75     | 0.212214 | 5.696178 | Unclassified | chr2:65920822-65964850    | 42.029  |
| Galnt1        | 0 | 0 | 0 | 1036 | 17.26667 | 8.66399  | 28.17791 | Unclassified | chr18:24362494-24445311   | 80.818  |
| Galc          | 0 | 0 | 0 | 261  | 4.35     | 2.33501  | 40.28888 | Stalled      | chr12:99440509-99499547   | 57.039  |
| Ogt           | 0 | 0 | 0 | 622  | 10.36667 | 15.4546  | 13.08083 | Unclassified | chrX:98833402-98879688    | 44.287  |
| Adamts6       | 0 | 0 | 0 | 290  | 4.833333 | 0.592709 | 3.352572 | Unclassified | chr13:105075952-105284843 | 206.892 |
| Galr2         | 0 | 0 | 0 | 17   | 0.283333 | 1.15611  | 0.666944 | Unclassified | chr11:116140252-116145252 | 3.001   |
| Olfr1491      | 0 | 0 | 0 | 0    | 0        | 0.01335  | 0        | Unclassified | chr19:13777318-13780278   | 0.961   |
| Ccdc90a       | 0 | 0 | 0 | 265  | 4.416667 | 8.18244  | 26.66202 | Stalled      | chr13:43636927-43657530   | 18.604  |
| Las1l         | 0 | 0 | 0 | 255  | 4.25     | 18.7746  | 30.59723 | Stalled      | chrX:93130651-93154298    | 21.648  |
| Depdc1a       | 0 | 0 | 0 | 167  | 2.783333 | 1.15866  | 31.74781 | Stalled      | chr3:159156414-159192540  | 34.127  |
| Olfr1265      | 0 | 0 | 0 | 0    | 0        | 0.026324 | 0        | Unclassified | chr2:89875077-89878007    | 0.931   |
| Olfr1495      | 0 | 0 | 0 | 1    | 0.016667 | 0        | 0        | Unclassified | chr19:13840833-13843793   | 0.961   |
| Ag1           | 0 | 0 | 0 | 283  | 4.716667 | 0.897602 | 56.75098 | Stalled      | chr3:116442916-116513084  | 68.169  |
| Slc30a2       | 0 | 0 | 0 | 23   | 0.383333 | 0.156935 | 0.934558 | Unclassified | chr4:133896984-133908580  | 9.597   |
| Fbxw24        | 0 | 0 | 0 | 12   | 0.2      | 0.012918 | 0        | Unclassified | chr9:109503630-109530571  | 24.942  |
| 5730601F06Rik | 0 | 0 | 0 | 513  | 8.55     | 1.5597   | 19.21968 | Unclassified | chr9:20299519-20327863    | 26.345  |
| Epas1         | 0 | 0 | 0 | 205  | 3.416667 | 0.467498 | 9.880337 | Unclassified | chr17:87151203-87232750   | 79.548  |
| B3galtl       | 0 | 0 | 0 | 184  | 3.066667 | 0.471048 | 21.83031 | Stalled      | chr5:150478831-150565174  | 84.344  |
| Pnma5         | 0 | 0 | 0 | 2    | 0.033333 | 0.033727 | 0        | Unclassified | chrX:70279326-70284442    | 3.117   |
| 4930434E21Rik | 0 | 0 | 0 | 98   | 1.633333 | 0.025819 | 0.922662 | Unclassified | chr5:150329253-150414469  | 83.217  |
| Tor1a         | 0 | 0 | 0 | 438  | 7.3      | 25.4196  | 7.036149 | Unclassified | chr2:30816146-30825404    | 7.259   |
| Vmn2r49       | 0 | 0 | 0 | 0    | 0        | 0.00206  | 0        | Unclassified | chr7:10561593-10579488    | 15.896  |
| Aym1          | 0 | 0 | 0 | 1    | 0.016667 | 0.485409 | 1        | Unclassified | chr5:113784313-113786841  | 0.529   |
| Fbxw22        | 0 | 0 | 0 | 10   | 0.166667 | 0.032441 | 0.756743 | Unclassified | chr9:109280924-109308810  | 25.887  |
| Gm12776       | 0 | 0 | 0 | 6    | 0.1      | 0        | 1.048525 | Unclassified | chr7:34878449-34885856    | 5.408   |
| Skint11       | 0 | 0 | 0 | 17   | 0.283333 | 0.093778 | 0        | Unclassified | chr4:113833988-113917633  | 81.646  |
| Skint6        | 0 | 0 | 0 | 148  | 2.466667 | 0        | 2.30551  | Unclassified | chr4:112477220-112961578  | 482.359 |
| Homez         | 0 | 0 | 0 | 33   | 0.55     | 0.939824 | 1.03114  | Unclassified | chr14:55471573-55481327   | 7.755   |
| Nrsn2         | 0 | 0 | 0 | 25   | 0.416667 | 0.074298 | 0.489752 | Unclassified | chr2:152194493-152204302  | 7.81    |
| Slc46a2       | 0 | 0 | 0 | 65   | 1.083333 | 0.055994 | 0.626084 | Unclassified | chr4:59918770-59929928    | 9.159   |
| Olfr275       | 0 | 0 | 0 | 0    | 0        | 0        | 0        | Unclassified | chr4:52836270-52839228    | 0.959   |
| Ppp2r2b       | 0 | 0 | 0 | 287  | 4.783333 | 0.057684 | 0.59181  | Unclassified | chr18:42804922-43221125   | 414.204 |
| Nxt1          | 0 | 0 | 0 | 217  | 3.166667 | 24.5564  | 14.20205 | Stalled      | chr2:148496350-148501762  | 3.413   |
| Glycam1       | 0 | 0 | 0 | 4    | 0.066667 | 0        | 0.397227 | Unclassified | chr15:103393192-103397509 | 2.318   |
| Gsg1          | 0 | 0 | 0 | 48   | 0.8      | 0.12749  | 0.54257  | Unclassified | chr6:135187347-135206354  | 17.008  |
| Tbk1          | 0 | 0 | 0 | 1391 | 23.18333 | 13.1365  | 12.27281 | Unclassified | chr10:120983514-121025850 | 40.337  |
| Shroom2       | 0 | 0 | 0 | 62   | 1.033333 | 0.041045 | 1.45194  | Unclassified | chrX:149044051-149206004  | 159.954 |
| Aqp8          | 0 | 0 | 0 | 10   | 0.166667 | 0.051613 | 0        | Unclassified | chr7:130603807-130611517  | 5.711   |
| Adra2a        | 0 | 0 | 0 | 31   | 0.516667 | 0.903369 | 1.490267 | Unclassified | chr19:54117671-54123472   | 3.802   |
| Upk3b         | 0 | 0 | 0 | 24   | 0.4      | 0.062949 | 0.93604  | Unclassified | chr5:136512365-136520863  | 6.499   |
| Adra2c        | 0 | 0 | 0 | 10   | 0.166667 | 0.144274 | 0.478095 | Unclassified | chr5:35619214-35624412    | 3.199   |
| Adra2b        | 0 | 0 | 0 | 20   | 0.333333 | 0.380883 | 2.660058 | Unclassified | chr2:127187021-127192957  | 3.937   |
| Snx13         | 0 | 0 | 0 | 642  | 10.7     | 1.82491  | 62.55653 | Stalled      | chr12:35729860-35832144   | 100.285 |
| Olfr1279      | 0 | 0 | 0 | 0    | 0        | 0.033997 | 0        | Unclassified | chr2:111144357-111147299  | 0.943   |
| Olfr356       | 0 | 0 | 0 | 2    | 0.033333 | 0        | 2        | Unclassified | chr2:36790640-36793588    | 0.949   |
| Olfr720       | 0 | 0 | 0 | 0    | 0        | 0        | 0        | Unclassified | chr14:15007643-15010594   | 0.952   |
| Olfr1350      | 0 | 0 | 0 | 1    | 0.016667 | 0.027651 | 1        | Unclassified | chr7:6520703-6523630      | 0.928   |
| Olfr1323      | 0 | 0 | 0 | 0    | 0        | 0.041343 | 0        | Unclassified | chrX:47362482-47365412    | 0.931   |
| Olfr1347      | 0 | 0 | 0 | 2    | 0.033333 | 0.033328 | 1        | Unclassified | chr7:6440623-6443583      | 0.961   |
| Olfr461       | 0 | 0 | 0 | 1    | 0.016667 | 0.040816 | 1        | Unclassified | chr6:40494034-40496976    | 0.943   |
| Tnfrsf22      | 0 | 0 | 0 | 161  | 2.683333 | 1.67608  | 15.63627 | Stalled      | chr7:150822629-150837543  | 12.915  |
| Ano1          | 0 | 0 | 0 | 220  | 3.666667 | 0.017573 | 0.815884 | Unclassified | chr7:151774555-151926383  | 149.829 |
| Suv39h2       | 0 | 0 | 0 | 582  | 9.7      | 2.74201  | 17.90708 | Unclassified | chr2:3373087-3394258      | 19.172  |
| Ube2h         | 0 | 0 | 0 | 881  | 14.68333 | 7.17867  | 14.46214 | Unclassified | chr6:30161288-30256539    | 93.252  |
| Hoxb2         | 0 | 0 | 0 | 5    | 0.083333 | 0.141617 | 0        | Unclassified | chr11:96210945-96215328   | 2.384   |
| Pgr15l        | 0 | 0 | 0 | 1    | 0.016667 | 0.009531 | 0        | Unclassified | chrX:94265934-94277443    | 9.51    |
| Eda2r         | 0 | 0 | 0 | 16   | 0.266667 | 0.043575 | 0        | Unclassified | chrX:94529180-94574548    | 43.369  |
| Zc4h2         | 0 | 0 | 0 | 23   | 0.383333 | 1.16533  | 7.645958 | Unclassified | chrX:92834535-92855771    | 19.237  |
| Ube2g2        | 0 | 0 | 0 | 949  | 15.81667 | 25.8419  | 10.57815 | Unclassified | chr10:77083065-77108735   | 23.671  |
| Ankrd5        | 0 | 0 | 0 | 21   | 0.35     | 0.037654 | 1.667818 | Unclassified | chr2:136356056-136381590  | 23.535  |
| Larp1b        | 0 | 0 | 0 | 341  | 5.683333 | 6.14651  | 24.77566 | Stalled      | chr3:40752552-40781715    | 27.164  |
| E130012A19Rik | 0 | 0 | 0 | 211  | 3.516667 | 10.8065  | 10.74109 | Stalled      | chr11:97488700-97493030   | 2.331   |



|               |   |   |   |      |          |          |          |              |                           |         |
|---------------|---|---|---|------|----------|----------|----------|--------------|---------------------------|---------|
| Sumo1         | 0 | 0 | 0 | 526  | 8.766667 | 17.0973  | 32.08661 | Unclassified | chr1:59696277-59729678    | 31.402  |
| Psmc4         | 0 | 0 | 0 | 794  | 13.23333 | 7.62452  | 45.94162 | Unclassified | chr11:30669774-30780361   | 108.588 |
| St6gal2       | 0 | 0 | 0 | 43   | 0.716667 | 0        | 1.135238 | Unclassified | chr17:55583014-55638524   | 53.511  |
| Ebf4          | 0 | 0 | 0 | 121  | 2.016667 | 0.288007 | 2.378218 | Unclassified | chr2:130119674-130196217  | 74.544  |
| Mrps24        | 0 | 0 | 0 | 255  | 4.25     | 39.7143  | 14.39098 | Unclassified | chr11:5603985-5609702     | 3.718   |
| Inpp1         | 0 | 0 | 0 | 289  | 4.816667 | 7.67373  | 1.656067 | Elongating   | chr7:108971145-108988740  | 15.596  |
| BC011426      | 0 | 0 | 0 | 190  | 3.166667 | 1.25058  | 25.81033 | Stalled      | chr17:56029515-56038353   | 6.839   |
| Lars          | 0 | 0 | 0 | 741  | 12.35    | 18.4467  | 22.613   | Unclassified | chr18:42362002-42423725   | 59.724  |
| Ctnnb1        | 0 | 0 | 0 | 1414 | 23.56667 | 48.5801  | 7.462133 | Unclassified | chr9:120840517-120869624  | 27.108  |
| Ins2          | 0 | 0 | 0 | 1    | 0.016667 | 0        | 0        | Unclassified | chr7:149864565-149867613  | 1.049   |
| Sico2b1       | 0 | 0 | 0 | 92   | 1.533333 | 0.014627 | 0.373835 | Unclassified | chr7:106806313-106861850  | 53.538  |
| Olfr420       | 0 | 0 | 0 | 4    | 0.066667 | 0.183791 | 2        | Unclassified | chr1:176086852-176089898  | 1.047   |
| Tssk2         | 0 | 0 | 0 | 66   | 1.1      | 0.069242 | 1.284375 | Unclassified | chr16:17896729-17900117   | 1.389   |
| Txn14a        | 0 | 0 | 0 | 1269 | 21.15    | 69.5605  | 9.156788 | Unclassified | chr18:80401536-80422590   | 19.055  |
| Taar8b        | 0 | 0 | 0 | 0    | 0        | 0.01127  | 0        | Unclassified | chr10:23811065-23814100   | 1.036   |
| Srr           | 0 | 0 | 0 | 732  | 12.2     | 1.63315  | 10.27024 | Unclassified | chr11:74719860-74741300   | 19.441  |
| Dnajb9        | 0 | 0 | 0 | 444  | 7.4      | 12.0223  | 54.23565 | Stalled      | chr12:45306883-45313055   | 4.173   |
| Add3          | 0 | 0 | 0 | 750  | 12.5     | 10.1013  | 0.739013 | Unclassified | chr19:53216486-53321888   | 103.403 |
| Insr          | 0 | 0 | 0 | 612  | 10.2     | 1.79561  | 13.38749 | Stalled      | chr8:3150921-3281617      | 128.697 |
| Tbl2          | 0 | 0 | 0 | 536  | 8.933333 | 7.63359  | 15.33074 | Unclassified | chr5:135623580-135638532  | 12.953  |
| Mc5r          | 0 | 0 | 0 | 8    | 0.133333 | 0.143384 | 1.07074  | Unclassified | chr18:68495256-68499365   | 2.11    |
| 2700029M09Rik | 0 | 0 | 0 | 572  | 9.533333 | 13.6939  | 9.49085  | Unclassified | chr8:63367247-63386368    | 17.122  |
| Ppp2r2d       | 0 | 0 | 0 | 710  | 11.83333 | 8.57287  | 12.03009 | Unclassified | chr7:146036068-146074739  | 36.672  |
| Hmgb2         | 0 | 0 | 0 | 807  | 13.45    | 61.1521  | 6.703517 | Unclassified | chr8:59988639-59994796    | 4.158   |
| Rho           | 0 | 0 | 0 | 14   | 0.233333 | 0.055448 | 0        | Unclassified | chr6:115879944-115888848  | 6.905   |
| Zhx3          | 0 | 0 | 0 | 364  | 6.066667 | 0.878103 | 67.93301 | Stalled      | chr2:160596182-160700726  | 102.545 |
| Trim34        | 0 | 0 | 0 | 218  | 3.633333 | 5.55094  | 13.28587 | Stalled      | chr7:111390970-111410750  | 17.781  |
| Zfp459        | 0 | 0 | 0 | 55   | 0.916667 | 0.625027 | 14.38424 | Stalled      | chr13:67506657-67524354   | 15.698  |
| Hyal3         | 0 | 0 | 0 | 248  | 4.133333 | 0.876195 | 2.181867 | Elongating   | chr9:107481626-107489688  | 6.063   |
| Smgc          | 0 | 0 | 0 | 12   | 0.2      | 0        | 0.688561 | Unclassified | chr15:91666758-91691866   | 23.109  |
| Ms4a4d        | 0 | 0 | 0 | 34   | 0.566667 | 0.082972 | 0.814674 | Unclassified | chr19:11609338-11632956   | 21.619  |
| Atp4b         | 0 | 0 | 0 | 52   | 0.866667 | 0.106239 | 1.250621 | Unclassified | chr8:13386208-13398778    | 10.571  |
| Chst5         | 0 | 0 | 0 | 31   | 0.516667 | 0.172209 | 0.817919 | Unclassified | chr8:114413034-114436099  | 21.066  |
| Ostc          | 0 | 0 | 0 | 478  | 7.966667 | 76.4115  | 13.34524 | Unclassified | chr3:130398836-130414336  | 13.501  |
| Gm5938        | 0 | 0 | 0 | 2    | 0.033333 | 0        | 0        | Unclassified | chrX:75368805-75375742    | 4.938   |
| Tas2r102      | 0 | 0 | 0 | 0    | 0        | 0        | 0        | Unclassified | chr6:132710148-132713192  | 1.045   |
| Olfr1413      | 0 | 0 | 0 | 2    | 0.033333 | 0.072505 | 1        | Unclassified | chr1:94467749-94470721    | 0.973   |
| Olfr283       | 0 | 0 | 0 | 3    | 0.05     | 0        | 2        | Unclassified | chr15:98208609-98211539   | 0.931   |
| Olfr711       | 0 | 0 | 0 | 1    | 0.016667 | 0        | 0        | Unclassified | chr7:114114881-114120965  | 4.085   |
| Olfr713       | 0 | 0 | 0 | 1    | 0.016667 | 0.019702 | 0        | Unclassified | chr7:114177649-114180624  | 0.976   |
| Olfr714       | 0 | 0 | 0 | 0    | 0        | 0        | 0        | Unclassified | chr7:114215343-114218297  | 0.955   |
| Olfr705       | 0 | 0 | 0 | 1    | 0.016667 | 0        | 0        | Unclassified | chr7:114016806-114019757  | 0.952   |
| Olfr1122      | 0 | 0 | 0 | 2    | 0.033333 | 0.026129 | 0        | Unclassified | chr2:87225863-87228844    | 0.982   |
| Olfr1134      | 0 | 0 | 0 | 2    | 0.033333 | 0.095542 | 1        | Unclassified | chr2:87496137-87499076    | 0.94    |
| Olfr1120      | 0 | 0 | 0 | 1    | 0.016667 | 0        | 0        | Unclassified | chr2:87195602-87198547    | 0.946   |
| Gzmn          | 0 | 0 | 0 | 8    | 0.133333 | 0.053737 | 0.56528  | Unclassified | chr14:56784632-56795433   | 8.802   |
| Cyp2c37       | 0 | 0 | 0 | 4    | 0.066667 | 0.045033 | 0        | Unclassified | chr19:40064913-40086733   | 19.821  |
| Tulp2         | 0 | 0 | 0 | 196  | 3.266667 | 2.38317  | 0.039714 | Unclassified | chr7:52767075-52777973    | 8.899   |
| Krt71         | 0 | 0 | 0 | 12   | 0.2      | 0.017686 | 0.425587 | Unclassified | chr15:101564379-101575528 | 9.15    |
| Cyp2c38       | 0 | 0 | 0 | 16   | 0.266667 | 0.023762 | 0.828613 | Unclassified | chr19:39464045-39539565   | 73.521  |
| Mocs1         | 0 | 0 | 0 | 324  | 5.4      | 4.51538  | 16.41246 | Unclassified | chr17:49565688-49594755   | 27.068  |
| Mdm2          | 0 | 0 | 0 | 888  | 14.8     | 27.4026  | 8.719343 | Unclassified | chr10:117125960-117149772 | 21.813  |
| Mdm1          | 0 | 0 | 0 | 277  | 4.616667 | 2.19421  | 60.72704 | Stalled      | chr10:117576842-117606053 | 27.212  |
| Blzf1         | 0 | 0 | 0 | 242  | 4.033333 | 4.19166  | 16.86184 | Stalled      | chr1:166219930-166239615  | 17.686  |
| Vax2          | 0 | 0 | 0 | 60   | 1        | 0.415777 | 1.388129 | Unclassified | chr6:83659257-83688298    | 27.042  |
| Mdfi          | 0 | 0 | 0 | 32   | 0.533333 | 0.150162 | 0.80955  | Unclassified | chr17:47952280-47973640   | 19.361  |
| Olfr1426      | 0 | 0 | 0 | 2    | 0.033333 | 0.045855 | 0.764095 | Unclassified | chr19:12162099-12168337   | 4.239   |
| 1300018J18Rik | 0 | 0 | 0 | 473  | 7.883333 | 6.17214  | 9.638876 | Unclassified | chr15:88917536-88930770   | 11.235  |
| Avpr1b        | 0 | 0 | 0 | 17   | 0.283333 | 0.064885 | 1.377627 | Unclassified | chr1:133493690-133508577  | 12.888  |
| 6530401N04Rik | 0 | 0 | 0 | 288  | 4.8      | 4.88803  | 33.84263 | Stalled      | chr12:53098493-53109488   | 8.996   |
| Olfr910       | 0 | 0 | 0 | 2    | 0.033333 | 0.019772 | 2        | Unclassified | chr9:38343466-38347412    | 1.947   |
| Olfr869       | 0 | 0 | 0 | 0    | 0        | 0        | 0        | Unclassified | chr9:19931563-19942531    | 8.969   |
| Pdcd7         | 0 | 0 | 0 | 532  | 8.866667 | 10.3199  | 23.52473 | Unclassified | chr9:65191874-65207450    | 13.577  |
| Olfr907       | 0 | 0 | 0 | 0    | 0        | 0        | 0        | Unclassified | chr9:38304255-38307188    | 0.934   |
| Olfr862       | 0 | 0 | 0 | 0    | 0        | 0        | 0        | Unclassified | chr9:19687826-19690747    | 0.922   |
| Cbfa2t2       | 0 | 0 | 0 | 466  | 7.766667 | 1.23007  | 13.2823  | Stalled      | chr2:154260219-154365092  | 102.874 |
| Runx1t1       | 0 | 0 | 0 | 101  | 1.683333 | 0.162048 | 1.207578 | Unclassified | chr4:13668448-13820790    | 150.343 |
| Runx2         | 0 | 0 | 0 | 520  | 8.666667 | 6.04945  | 0.577321 | Unclassified | chr17:44740949-44953746   | 210.798 |
| Cav2          | 0 | 0 | 0 | 11   | 0.183333 | 0.564605 | 3.846863 | Unclassified | chr6:17229340-17239011    | 7.672   |
| Repin1        | 0 | 0 | 0 | 217  | 3.616667 | 2.87843  | 5.251192 | Unclassified | chr6:48541881-48549081    | 5.201   |
| Cd209b        | 0 | 0 | 0 | 5    | 0.083333 | 0.012689 | 0        | Unclassified | chr8:3917656-3928814      | 9.159   |
| Bhmt2         | 0 | 0 | 0 | 19   | 0.316667 | 0        | 2.848181 | Unclassified | chr13:94426051-94446257   | 18.207  |
| Aqp4          | 0 | 0 | 0 | 11   | 0.183333 | 0.063048 | 0        | Unclassified | chr18:15547902-15564193   | 14.292  |
| Bola1         | 0 | 0 | 0 | 413  | 6.883333 | 20.0195  | 335      | Unclassified | chr3:96000510-96003509    | 1       |
| Zar1          | 0 | 0 | 0 | 5    | 0.083333 | 0.814523 | 3        | Unclassified | chr5:72968354-72974323    | 3.97    |
| Slc24a5       | 0 | 0 | 0 | 268  | 4.466667 | 0.52458  | 0.068471 | Unclassified | chr2:124891862-124914413  | 20.552  |
| Olfr651       | 0 | 0 | 0 | 3    | 0.05     | 0        | 3        | Unclassified | chr7:111699434-111702376  | 0.943   |
| Gm5447        | 0 | 0 | 0 | 133  | 2.216667 | 0.989483 | 64.55609 | Stalled      | chr13:31064032-31068117   | 2.086   |
| Tbc1d4        | 0 | 0 | 0 | 426  | 7.1      | 2.53167  | 10.95469 | Stalled      | chr14:101841576-102010408 | 166.833 |
| Mgst2         | 0 | 0 | 0 | 342  | 5.7      | 13.9871  | 3.760199 | Unclassified | chr3:51463114-51486597    | 21.484  |
| Olfr987       | 0 | 0 | 0 | 2    | 0.033333 | 0.027529 | 2        | Unclassified | chr2:85171123-85174053    | 0.931   |
| Gm10696       | 0 | 0 | 0 | 1    | 0.016667 | 0.00921  | 1        | Unclassified | chr3:93978333-93984115    | 3.783   |
| Cox15         | 0 | 0 | 0 | 715  | 11.91667 | 4.83295  | 25.553   | Unclassified | chr19:43807743-43829490   | 19.748  |
| 38781         | 0 | 0 | 0 | 766  | 12.76667 | 5.9028   | 32.20354 | Unclassified | chr15:31385653-31462792   | 75.14   |
| AI837181      | 0 | 0 | 0 | 302  | 5.033333 | 17.9658  | 3.525922 | Unclassified | chr19:5423143-5427314     | 2.172   |
| Prss35        | 0 | 0 | 0 | 6    | 0.1      | 0.01016  | 1.536124 | Unclassified | chr9:86634433-86650678    | 14.246  |

|                      |   |   |   |      |          |          |          |              |                           |         |
|----------------------|---|---|---|------|----------|----------|----------|--------------|---------------------------|---------|
| <b>Arl13b</b>        | 0 | 0 | 0 | 223  | 3.716667 | 2.7816   | 24.16037 | Stalled      | chr16:62793514-62848866   | 53.353  |
| <b>Etaa1</b>         | 0 | 0 | 0 | 355  | 5.916667 | 4.3202   | 27.39376 | Unclassified | chr11:17838752-17855878   | 15.127  |
| <b>Ino80</b>         | 0 | 0 | 0 | 1855 | 30.91667 | 5.72007  | 32.23396 | Unclassified | chr2:119198778-119305365  | 104.588 |
| <b>Sync</b>          | 0 | 0 | 0 | 3    | 0.05     | 0.046019 | 2        | Unclassified | chr7:29323903-29327229    | 1.327   |
| <b>Ppdm16</b>        | 0 | 0 | 0 | 588  | 9.8      | 0.631425 | 1.061411 | Unclassified | chr4:153690233-154012982  | 320.75  |
| <b>Lalba</b>         | 0 | 0 | 0 | 13   | 0.216667 | 0.03497  | 0.613365 | Unclassified | chr15:98310830-98315114   | 2.285   |
| <b>Rnf180</b>        | 0 | 0 | 0 | 147  | 2.45     | 0.318292 | 0        | Unclassified | chr13:105937573-106085094 | 145.522 |
| <b>Lysmd4</b>        | 0 | 0 | 0 | 252  | 4.2      | 1.50364  | 1.481696 | Elongating   | chr7:74365493-74373342    | 5.85    |
| <b>Zbtb2</b>         | 0 | 0 | 0 | 604  | 10.06667 | 3.72509  | 10.53454 | Unclassified | chr10:5956432-5979467     | 21.036  |
| <b>Ppfa2</b>         | 0 | 0 | 0 | 162  | 2.7      | 0.063447 | 0.743623 | Unclassified | chr10:105905394-106369573 | 462.18  |
| <b>Pdha2</b>         | 0 | 0 | 0 | 0    | 0        | 0.239761 | 0        | Unclassified | chr3:140872967-140877319  | 2.353   |
| <b>Iqcj</b>          | 0 | 0 | 0 | 84   | 1.4      | 0.63317  | 0        | Unclassified | chr3:67694141-67860515    | 164.375 |
| <b>Gli2</b>          | 0 | 0 | 0 | 263  | 4.383333 | 0.051586 | 0.913407 | Unclassified | chr1:120730637-120952196  | 219.56  |
| <b>Gli1</b>          | 0 | 0 | 0 | 125  | 2.083333 | 0.094837 | 0.08186  | Unclassified | chr10:126766937-126780635 | 11.699  |
| <b>Pdgfa</b>         | 0 | 0 | 0 | 34   | 0.566667 | 0.555585 | 3.822411 | Unclassified | chr5:139452928-139472907  | 17.98   |
| <b>Pdgfb</b>         | 0 | 0 | 0 | 49   | 0.816667 | 0.161184 | 0.579133 | Unclassified | chr15:79826305-79847238   | 18.934  |
| <b>Pdha1</b>         | 0 | 0 | 0 | 330  | 5.5      | 23.2099  | 21.08329 | Unclassified | chrX:156560150-156578268  | 16.119  |
| <b>Gli3</b>          | 0 | 0 | 0 | 178  | 2.966667 | 0.048673 | 1.207838 | Unclassified | chr13:15553555-15821858   | 266.304 |
| <b>Slc2a12</b>       | 0 | 0 | 0 | 140  | 2.333333 | 0.265729 | 0.296971 | Unclassified | chr10:22362816-22423686   | 58.871  |
| <b>Gm5346</b>        | 0 | 0 | 0 | 1    | 0.016667 | 0.009866 | 0        | Unclassified | chr8:44710328-44714539    | 2.212   |
| <b>Gsx1</b>          | 0 | 0 | 0 | 8    | 0.133333 | 0.122956 | 7        | Unclassified | chr5:147998271-148002522  | 2.252   |
| <b>4932411N23Rik</b> | 0 | 0 | 0 | 0    | 0        | 0.01506  | 0        | Unclassified | chrX:123346993-123352397  | 3.405   |
| <b>Lama1</b>         | 0 | 0 | 0 | 124  | 2.066667 | 0.051168 | 1.53317  | Unclassified | chr17:68044604-68171985   | 125.382 |
| <b>Ngrn</b>          | 0 | 0 | 0 | 361  | 6.016667 | 18.5286  | 17.89627 | Unclassified | chr7:87404100-87410264    | 4.165   |
| <b>Fam19a3</b>       | 0 | 0 | 0 | 28   | 0.466667 | 0.201925 | 2.509831 | Unclassified | chr3:104570323-104582465  | 10.143  |
| <b>Dis3l</b>         | 0 | 0 | 0 | 493  | 8.216667 | 5.33008  | 23.93043 | Unclassified | chr9:64154815-64190997    | 34.183  |
| <b>Atp6ap2</b>       | 0 | 0 | 0 | 418  | 6.966667 | 11.6399  | 23.68493 | Unclassified | chrX:12162884-12194175    | 29.292  |
| <b>Ccdc129</b>       | 0 | 0 | 0 | 71   | 1.183333 | 0.019513 | 0.667588 | Unclassified | chr6:55785011-55928592    | 141.582 |
| <b>Cux1</b>          | 0 | 0 | 0 | 2835 | 47.25    | 9.12181  | 7.851977 | Unclassified | chr5:136724004-137045301  | 319.298 |
| <b>Cugbp1</b>        | 0 | 0 | 0 | 1086 | 18.1     | 13.8418  | 14.74296 | Unclassified | chr2:90778614-90857210    | 76.597  |
| <b>Pou1f1</b>        | 0 | 0 | 0 | 3    | 0.05     | 0.043892 | 0        | Unclassified | chr16:65518963-65534316   | 13.354  |
| <b>Olf305</b>        | 0 | 0 | 0 | 1    | 0.016667 | 0.040051 | 1        | Unclassified | chr7:93511885-93514845    | 0.961   |
| <b>Olf986</b>        | 0 | 0 | 0 | 1    | 0.016667 | 0.050508 | 0        | Unclassified | chr9:39992663-39995678    | 1.016   |
| <b>Klk1b4</b>        | 0 | 0 | 0 | 5    | 0.083333 | 0.038217 | 1.24812  | Unclassified | chr7:51460804-51467123    | 4.32    |
| <b>Smug1</b>         | 0 | 0 | 0 | 177  | 2.95     | 1.77673  | 8.40967  | Unclassified | chr15:102983720-102995715 | 9.996   |
| <b>Olf270</b>        | 0 | 0 | 0 | 3    | 0.05     | 0        | 1        | Unclassified | chr4:52981500-52984439    | 0.94    |
| <b>Osbp3</b>         | 0 | 0 | 0 | 315  | 5.25     | 0.686127 | 0.679969 | Unclassified | chr6:50243325-50334836    | 89.512  |
| <b>Fam13c</b>        | 0 | 0 | 0 | 92   | 1.533333 | 0.030567 | 0.562637 | Unclassified | chr10:69901415-70021479   | 118.065 |
| <b>Lce1d</b>         | 0 | 0 | 0 | 0    | 0        | 0.084997 | 0        | Unclassified | chr3:92489420-92493132    | 1.713   |
| <b>Golga4</b>        | 0 | 0 | 0 | 865  | 14.41667 | 10.2163  | 8.123194 | Unclassified | chr9:118413435-118491637  | 76.203  |
| <b>Serpinc3a</b>     | 0 | 0 | 0 | 3    | 0.05     | 0        | 1.702292 | Unclassified | chr1:108942163-108950880  | 6.718   |
| <b>Plat</b>          | 0 | 0 | 0 | 47   | 0.783333 | 0.08605  | 1.940714 | Unclassified | chr8:23866215-23893320    | 25.106  |
| <b>Pdim4</b>         | 0 | 0 | 0 | 26   | 0.433333 | 0.108337 | 1.492092 | Unclassified | chr11:53868431-53884519   | 14.089  |
| <b>Fkbp3</b>         | 0 | 0 | 0 | 462  | 7.7      | 30.9399  | 18.38007 | Unclassified | chr12:66163418-66176925   | 11.508  |
| <b>Esam</b>          | 0 | 0 | 0 | 60   | 1        | 0.25605  | 3.843164 | Unclassified | chr9:37333673-37345902    | 10.23   |
| <b>Svil</b>          | 0 | 0 | 0 | 1033 | 17.21667 | 5.85975  | 5.474659 | Unclassified | chr18:4918564-5119288     | 198.725 |
| <b>Tnfrsf19</b>      | 0 | 0 | 0 | 112  | 1.866667 | 1.64588  | 4.98419  | Unclassified | chr14:61582670-61667692   | 83.023  |
| <b>Olf320</b>        | 0 | 0 | 0 | 1    | 0.016667 | 0.042503 | 0        | Unclassified | chr11:58495376-58498297   | 0.922   |
| <b>Sgtb</b>          | 0 | 0 | 0 | 180  | 3        | 0.606334 | 33.30021 | Stalled      | chr13:104897869-104931521 | 31.653  |
| <b>Grip2</b>         | 0 | 0 | 0 | 132  | 2.2      | 0.029904 | 1.050665 | Unclassified | chr6:91711502-91759387    | 45.886  |
| <b>2410012M07Rik</b> | 0 | 0 | 0 | 2    | 0.033333 | 0        | 0        | Unclassified | chr9:98763185-98766999    | 1.815   |
| <b>Pappa</b>         | 0 | 0 | 0 | 145  | 2.416667 | 0.03603  | 0        | Unclassified | chr4:64783207-65018543    | 233.337 |
| <b>2310021H06Rik</b> | 0 | 0 | 0 | 7    | 0.116667 | 0        | 0        | Unclassified | chr2:153986342-153994182  | 5.841   |
| <b>4930511Ii1Rik</b> | 0 | 0 | 0 | 21   | 0.35     | 0.058203 | 1.231115 | Unclassified | chr17:28665805-28675918   | 8.114   |
| <b>Kcna10</b>        | 0 | 0 | 0 | 16   | 0.266667 | 0.269552 | 0.942229 | Unclassified | chr3:106984060-106998639  | 12.58   |
| <b>Abca8a</b>        | 0 | 0 | 0 | 40   | 0.666667 | 0.032365 | 0.624957 | Unclassified | chr11:109886947-109954934 | 65.988  |
| <b>4930412F15Rik</b> | 0 | 0 | 0 | 45   | 0.75     | 0.079966 | 8.150456 | Unclassified | chr4:43672493-43683731    | 9.239   |
| <b>Tmem8b</b>        | 0 | 0 | 0 | 93   | 1.55     | 0.673613 | 6.967673 | Unclassified | chr4:43679842-43705539    | 23.698  |
| <b>Baalc</b>         | 0 | 0 | 0 | 20   | 0.333333 | 0.022145 | 0.476089 | Unclassified | chr15:38763454-38782810   | 17.357  |
| <b>Rnf181</b>        | 0 | 0 | 0 | 287  | 4.783333 | 29.0893  | 8.220018 | Unclassified | chr6:72309707-72314375    | 2.669   |
| <b>Fam71f1</b>       | 0 | 0 | 0 | 26   | 0.433333 | 0.121137 | 0.861295 | Unclassified | chr6:29267139-29286022    | 16.884  |
| <b>Cul7</b>          | 0 | 0 | 0 | 336  | 5.6      | 5.03001  | 18.37147 | Unclassified | chr17:46785286-46801313   | 14.028  |
| <b>Gjc2</b>          | 0 | 0 | 0 | 99   | 1.65     | 0.129756 | 3.34797  | Unclassified | chr11:58989065-58998715   | 7.651   |
| <b>Aqp1</b>          | 0 | 0 | 0 | 22   | 0.366667 | 0.455072 | 0.372067 | Unclassified | chr6:55284292-55298549    | 12.258  |
| <b>Gpr35</b>         | 0 | 0 | 0 | 28   | 0.466667 | 0.099401 | 0.329291 | Unclassified | chr1:94867695-94882968    | 13.274  |
| <b>Arl6ip6</b>       | 0 | 0 | 0 | 896  | 14.93333 | 10.349   | 42.00004 | Unclassified | chr2:53049117-53078255    | 27.139  |
| <b>Trim50</b>        | 0 | 0 | 0 | 39   | 0.65     | 0.044133 | 2.464945 | Unclassified | chr5:135827165-135843524  | 14.36   |
| <b>Rcl1</b>          | 0 | 0 | 0 | 965  | 16.08333 | 19.1891  | 10.64988 | Unclassified | chr19:29173864-29218333   | 42.47   |
| <b>Chrm2</b>         | 0 | 0 | 0 | 1    | 0.016667 | 0        | 0        | Unclassified | chr6:36471169-36474774    | 1.606   |
| <b>Slc17a6</b>       | 0 | 0 | 0 | 26   | 0.433333 | 0.017801 | 0        | Unclassified | chr7:58875199-58926496    | 49.298  |
| <b>Lce1l</b>         | 0 | 0 | 0 | 3    | 0.05     | 0        | 3        | Unclassified | chr3:92653870-92657208    | 1.339   |
| <b>Rab2a</b>         | 0 | 0 | 0 | 842  | 14.03333 | 22.0775  | 12.77056 | Unclassified | chr4:8460790-8534849      | 72.06   |
| <b>Pdzk1</b>         | 0 | 0 | 0 | 176  | 2.933333 | 0.724486 | 0.949719 | Unclassified | chr3:96631987-96674848    | 40.862  |
| <b>Usp14</b>         | 0 | 0 | 0 | 704  | 11.73333 | 5.39488  | 13.69055 | Unclassified | chr18:9993612-10032147    | 36.536  |
| <b>Med12</b>         | 0 | 0 | 0 | 336  | 5.6      | 11.7486  | 9.699201 | Unclassified | chrX:98467429-98494273    | 24.845  |
| <b>Nampt</b>         | 0 | 0 | 0 | 1016 | 16.93333 | 8.35648  | 17.25659 | Unclassified | chr12:33503199-33538233   | 33.035  |
| <b>Huwe1</b>         | 0 | 0 | 0 | 2241 | 37.35    | 23.3886  | 35.00605 | Unclassified | chrX:148235824-148369961  | 132.138 |
| <b>Lpl</b>           | 0 | 0 | 0 | 29   | 0.483333 | 0.123447 | 1.54189  | Unclassified | chr8:71402453-71430831    | 26.379  |
| <b>Rbm27</b>         | 0 | 0 | 0 | 766  | 12.76667 | 5.87011  | 30.03971 | Unclassified | chr18:42433006-42501192   | 66.187  |
| <b>Rassf8</b>        | 0 | 0 | 0 | 10   | 0.166667 | 0.377168 | 0        | Unclassified | chr6:145754902-145766104  | 9.203   |
| <b>ENSMUSG00000</b>  | 0 | 0 | 0 | 274  | 4.566667 | 14.3001  | 10.5814  | Unclassified | chr10:112362483-112368082 | 3.6     |
| <b>Sema3f</b>        | 0 | 0 | 0 | 81   | 1.35     | 0.169978 | 1.472756 | Unclassified | chr9:107583832-107614806  | 28.975  |
| <b>Best3</b>         | 0 | 0 | 0 | 54   | 0.9      | 0.315812 | 0.415836 | Unclassified | chr10:116421369-116462096 | 38.728  |
| <b>App</b>           | 0 | 0 | 0 | 461  | 7.683333 | 5.51455  | 9.456437 | Unclassified | chr16:84954687-85175948   | 219.262 |
| <b>Cntfr</b>         | 0 | 0 | 0 | 56   | 0.933333 | 0.076578 | 0.426017 | Unclassified | chr4:41604529-41646123    | 39.595  |
| <b>Cdh16</b>         | 0 | 0 | 0 | 23   | 0.383333 | 0.062737 | 0.698116 | Unclassified | chr8:107138046-107150161  | 10.116  |

|                      |   |   |   |      |          |          |          |              |                           |         |
|----------------------|---|---|---|------|----------|----------|----------|--------------|---------------------------|---------|
| <b>Cdh2</b>          | 0 | 0 | 0 | 134  | 2.233333 | 0.047334 | 0.6259   | Unclassified | chr18:16747385-16969558   | 220.174 |
| <b>Rnft1</b>         | 0 | 0 | 0 | 548  | 9.133333 | 2.59227  | 23.63283 | Unclassified | chr11:86296158-86312509   | 14.352  |
| <b>Cyp3a41b</b>      | 0 | 0 | 0 | 1    | 0.016667 | 0.036273 | 0        | Unclassified | chr5:146319532-146347599  | 26.068  |
| <b>Memo1</b>         | 0 | 0 | 0 | 1120 | 18.66667 | 9.92041  | 36.39441 | Unclassified | chr17:74600045-74696323   | 94.279  |
| <b>Tmx1</b>          | 0 | 0 | 0 | 408  | 6.8      | 17.7571  | 47.50164 | Stalled      | chr12:71552140-71568611   | 14.472  |
| <b>Cobl</b>          | 0 | 0 | 0 | 154  | 2.566667 | 0.025094 | 0.597671 | Unclassified | chr11:12136678-12366963   | 228.286 |
| <b>Gstm7</b>         | 0 | 0 | 0 | 11   | 0.183333 | 0.387822 | 3.671817 | Unclassified | chr3:107729251-107736663  | 5.413   |
| <b>Tas2r139</b>      | 0 | 0 | 0 | 1    | 0.016667 | 0.040051 | 1        | Unclassified | chr6:42088934-42091894    | 0.961   |
| <b>Pnp1a5</b>        | 0 | 0 | 0 | 25   | 0.416667 | 0.022697 | 0.605653 | Unclassified | chr15:83943050-83955605   | 10.556  |
| <b>Zmym1</b>         | 0 | 0 | 0 | 326  | 5.433333 | 3.27894  | 19.45688 | Unclassified | chr4:126724337-126740376  | 14.04   |
| <b>Tpx2</b>          | 0 | 0 | 0 | 701  | 11.68333 | 26.0633  | 9.627428 | Unclassified | chr2:152671699-152721057  | 47.359  |
| <b>Brsk2</b>         | 0 | 0 | 0 | 254  | 4.233333 | 0.112957 | 0.887149 | Unclassified | chr7:149133655-149190148  | 54.494  |
| <b>Trib3</b>         | 0 | 0 | 0 | 135  | 2.25     | 3.855    | 13.22605 | Stalled      | chr2:152163160-152171796  | 6.637   |
| <b>Tchh1</b>         | 0 | 0 | 0 | 1    | 0.016667 | 0.01861  | 0        | Unclassified | chr3:93270675-93275902    | 3.228   |
| <b>Uchl3</b>         | 0 | 0 | 0 | 717  | 11.95    | 32.6027  | 9.867315 | Unclassified | chr14:102051183-102095342 | 42.16   |
| <b>Clic5</b>         | 0 | 0 | 0 | 111  | 1.85     | 0.395128 | 0.456188 | Unclassified | chr17:44323520-444171117  | 91.598  |
| <b>Enpp4</b>         | 0 | 0 | 0 | 24   | 0.4      | 0.31765  | 4.794872 | Unclassified | chr17:44233258-44244757   | 9.5     |
| <b>E330017A01Rik</b> | 0 | 0 | 0 | 5    | 0.083333 | 0.056793 | 0.416683 | Unclassified | chr16:58635374-58640516   | 3.143   |
| <b>Rfng</b>          | 0 | 0 | 0 | 174  | 2.9      | 8.33118  | 16.91312 | Stalled      | chr11:120642058-120647518 | 3.461   |
| <b>5430407P10Rik</b> | 0 | 0 | 0 | 47   | 0.783333 | 0.590238 | 4.141482 | Unclassified | chr2:6019545-6053231      | 31.687  |
| <b>Ikzf5</b>         | 0 | 0 | 0 | 234  | 3.9      | 2.4502   | 27.16291 | Stalled      | chr7:138532162-138555992  | 21.831  |
| <b>Resp18</b>        | 0 | 0 | 0 | 13   | 0.216667 | 0.054154 | 0.320148 | Unclassified | chr1:75268776-75276955    | 6.18    |
| <b>Kcnd3</b>         | 0 | 0 | 0 | 268  | 4.466667 | 0.03933  | 1.365912 | Unclassified | chr3:105253247-105476920  | 221.674 |
| <b>Bex1</b>          | 0 | 0 | 0 | 1    | 0.016667 | 0.353525 | 0        | Unclassified | chrX:132748510-132752052  | 1.543   |
| <b>Irak1bp1</b>      | 0 | 0 | 0 | 249  | 4.15     | 5.0587   | 46.83928 | Stalled      | chr9:82721412-82741295    | 17.884  |
| <b>Rev3l</b>         | 0 | 0 | 0 | 1116 | 18.6     | 2.02456  | 52.79628 | Stalled      | chr10:39449965-39595011   | 143.047 |
| <b>Btbd12</b>        | 0 | 0 | 0 | 408  | 6.8      | 7.17764  | 0.692772 | Unclassified | chr16:3979122-4003680     | 22.559  |
| <b>Zfp161</b>        | 0 | 0 | 0 | 188  | 3.133333 | 3.1296   | 18.71073 | Stalled      | chr17:69731317-69739884   | 6.568   |
| <b>Zfp148</b>        | 0 | 0 | 0 | 1444 | 24.06667 | 2.45301  | 34.77144 | Unclassified | chr16:33378860-33503989   | 123.13  |
| <b>Olfr635</b>       | 0 | 0 | 0 | 0    | 0        | 0.009356 | 0        | Unclassified | chr7:111125689-111128654  | 0.966   |
| <b>1700019M22Rik</b> | 0 | 0 | 0 | 2    | 0.033333 | 0.084876 | 2        | Unclassified | chr12:97284828-97287432   | 0.605   |
| <b>Gcm2</b>          | 0 | 0 | 0 | 12   | 0.2      | 0.102388 | 0.45662  | Unclassified | chr13:41196795-41207357   | 8.563   |
| <b>Mthfs</b>         | 0 | 0 | 0 | 66   | 1.1      | 8.37112  | 5.530926 | Unclassified | chr9:89104027-89135063    | 29.037  |
| <b>1700016C15Rik</b> | 0 | 0 | 0 | 50   | 0.833333 | 0        | 0.985196 | Unclassified | chr1:179657944-179683436  | 23.493  |
| <b>Klk7</b>          | 0 | 0 | 0 | 4    | 0.066667 | 0.036723 | 0        | Unclassified | chr7:51064813-51071729    | 4.917   |
| <b>Sic7a11</b>       | 0 | 0 | 0 | 96   | 1.6      | 0        | 5.317864 | Unclassified | chr3:50168857-50249535    | 78.679  |
| <b>Arl6ip5</b>       | 0 | 0 | 0 | 404  | 6.733333 | 63.966   | 7.615213 | Unclassified | chr6:97158785-97183309    | 22.525  |
| <b>Nudt19</b>        | 0 | 0 | 0 | 474  | 7.9      | 13.1544  | 15.72487 | Unclassified | chr7:36332203-36342947    | 8.745   |
| <b>Asb17</b>         | 0 | 0 | 0 | 10   | 0.166667 | 0.122293 | 0.582463 | Unclassified | chr3:153505210-153516579  | 9.37    |
| <b>D1Pas1</b>        | 0 | 0 | 0 | 4    | 0.066667 | 1.07294  | 1.377529 | Unclassified | chr1:188789294-188794506  | 3.213   |
| <b>Rpl10</b>         | 0 | 0 | 0 | 708  | 11.8     | 0        | 4.78457  | Unclassified | chrX:71514154-71518473    | 2.32    |
| <b>Nudt15</b>        | 0 | 0 | 0 | 169  | 2.816667 | 1.34558  | 0        | Unclassified | chr14:73919670-73950049   | 28.38   |
| <b>Fpgt</b>          | 0 | 0 | 0 | 181  | 3.016667 | 0.943138 | 27.93438 | Stalled      | chr3:154747882-154758342  | 8.461   |
| <b>1700019G17Rik</b> | 0 | 0 | 0 | 47   | 0.783333 | 1.76064  | 6.729525 | Unclassified | chr6:85849044-85856932    | 5.889   |
| <b>Gm13088</b>       | 0 | 0 | 0 | 0    | 0        | 0.014075 | 0        | Unclassified | chr4:143243662-143249149  | 3.488   |
| <b>Olfr1256</b>      | 0 | 0 | 0 | 2    | 0.033333 | 0        | 1        | Unclassified | chr2:89675179-89678100    | 0.922   |
| <b>Il20rb</b>        | 0 | 0 | 0 | 240  | 4        | 0.951656 | 1.106893 | Unclassified | chr9:100358137-100388892  | 28.756  |
| <b>Tmem192</b>       | 0 | 0 | 0 | 455  | 7.583333 | 12.8569  | 29.84764 | Unclassified | chr8:67469083-67492933    | 21.851  |
| <b>3110007F17Rik</b> | 0 | 0 | 0 | 37   | 0.616667 | 1.26014  | 30.62795 | Stalled      | chrX:120215167-120256902  | 39.736  |
| <b>Ppp1r16a</b>      | 0 | 0 | 0 | 256  | 4.266667 | 5.63316  | 8.596917 | Unclassified | chr15:76500109-76525345   | 23.237  |
| <b>Olfr1203</b>      | 0 | 0 | 0 | 2    | 0.033333 | 0.016723 | 2        | Unclassified | chr2:88669275-88672199    | 0.925   |
| <b>Fut11</b>         | 0 | 0 | 0 | 688  | 11.46667 | 6.8322   | 14.83346 | Unclassified | chr14:21512189-21519419   | 5.231   |
| <b>Ccdc79</b>        | 0 | 0 | 0 | 101  | 1.683333 | 0.265016 | 26.93623 | Stalled      | chr8:106970618-107035787  | 63.17   |
| <b>Tcf7l1</b>        | 0 | 0 | 0 | 305  | 5.083333 | 0.635415 | 4.361295 | Unclassified | chr6:72576373-72740950    | 162.578 |
| <b>Sparcl1</b>       | 0 | 0 | 0 | 29   | 0.483333 | 0.053504 | 0.548234 | Unclassified | chr5:104508129-104545107  | 34.979  |
| <b>Ecm1</b>          | 0 | 0 | 0 | 158  | 2.633333 | 1.34267  | 3.739243 | Unclassified | chr3:95538070-95545492    | 5.423   |
| <b>Eda</b>           | 0 | 0 | 0 | 97   | 1.616667 | 0.315487 | 0.817011 | Unclassified | chrX:97168944-97596099    | 425.156 |
| <b>Ect2</b>          | 0 | 0 | 0 | 746  | 12.43333 | 5.76968  | 12.12673 | Unclassified | chr3:26996147-27054758    | 56.612  |
| <b>Flna</b>          | 0 | 0 | 0 | 1058 | 17.63333 | 49.7328  | 6.076401 | Unclassified | chrX:71468799-71493873    | 23.075  |
| <b>1700018A14Rik</b> | 0 | 0 | 0 | 70   | 1.166667 | 10.3613  | 65       | Unclassified | chr18:46356674-46359385   | 0.712   |
| <b>Sgpp1</b>         | 0 | 0 | 0 | 300  | 5        | 9.93355  | 15.71125 | Unclassified | chr12:76815234-76838716   | 21.483  |
| <b>Elp4</b>          | 0 | 0 | 0 | 560  | 9.333333 | 2.82745  | 54.99943 | Stalled      | chr2:105540265-105746657  | 204.393 |
| <b>Fam195b</b>       | 0 | 0 | 0 | 363  | 6.05     | 24.0121  | 11.19799 | Unclassified | chr11:120404201-120413041 | 6.841   |
| <b>Eif4a3</b>        | 0 | 0 | 0 | 841  | 14.01667 | 68.8194  | 7.534844 | Unclassified | chr11:119149676-119163357 | 11.682  |
| <b>Acot11</b>        | 0 | 0 | 0 | 167  | 2.783333 | 1.2828   | 2.379516 | Unclassified | chr4:106417165-106474436  | 55.272  |
| <b>2410042D21Rik</b> | 0 | 0 | 0 | 296  | 4.933333 | 2.55547  | 23.86955 | Stalled      | chr2:112217367-112254394  | 35.028  |
| <b>Fam132b</b>       | 0 | 0 | 0 | 389  | 6.483333 | 0.359677 | 0.309593 | Unclassified | chr1:93261006-93270794    | 7.789   |
| <b>Olfr1214</b>      | 0 | 0 | 0 | 1    | 0.016667 | 0        | 0        | Unclassified | chr2:88827421-88830357    | 0.937   |
| <b>Sost</b>          | 0 | 0 | 0 | 19   | 0.316667 | 0.75667  | 0        | Unclassified | chr11:101823772-101830329 | 4.558   |
| <b>Cdc16</b>         | 0 | 0 | 0 | 483  | 8.05     | 9.87714  | 9.983443 | Unclassified | chr8:13755689-13781882    | 24.194  |
| <b>Angptl2</b>       | 0 | 0 | 0 | 126  | 2.1      | 0        | 1.248892 | Unclassified | chr2:33069480-33103234    | 31.755  |
| <b>Amotl1</b>        | 0 | 0 | 0 | 122  | 2.033333 | 0.197909 | 1.557219 | Unclassified | chr9:14346410-14421444    | 73.035  |
| <b>Dvl3</b>          | 0 | 0 | 0 | 295  | 4.916667 | 5.9662   | 13.20306 | Unclassified | chr16:20515136-20532260   | 15.125  |
| <b>Lgi1</b>          | 0 | 0 | 0 | 37   | 0.616667 | 0.046535 | 0.552195 | Unclassified | chr19:38337271-38383429   | 44.159  |
| <b>Mmp16</b>         | 0 | 0 | 0 | 88   | 1.466667 | 0.07282  | 0.754464 | Unclassified | chr4:17778628-18045881    | 265.254 |
| <b>Dvl1</b>          | 0 | 0 | 0 | 349  | 5.816667 | 18.0266  | 5.066667 | Unclassified | chr4:155219520-155233412  | 11.893  |
| <b>D1Ert622e</b>     | 0 | 0 | 0 | 757  | 12.61667 | 9.54371  | 11.69106 | Unclassified | chr1:99540478-99560595    | 18.118  |
| <b>Mme</b>           | 0 | 0 | 0 | 47   | 0.783333 | 0.021159 | 1.309609 | Unclassified | chr3:63097793-63186153    | 86.361  |
| <b>Mmp12</b>         | 0 | 0 | 0 | 9    | 0.15     | 0.053298 | 0        | Unclassified | chr9:7345373-7360461      | 13.089  |
| <b>Ctsr</b>          | 0 | 0 | 0 | 2    | 0.033333 | 0.019201 | 0.798995 | Unclassified | chr13:61260575-61267549   | 4.975   |
| <b>Zfp353</b>        | 0 | 0 | 0 | 1    | 0.016667 | 0.018813 | 0        | Unclassified | chr8:43164626-43171733    | 5.108   |
| <b>V1rd20</b>        | 0 | 0 | 0 | 0    | 0        | 0        | 0        | Unclassified | chr7:24767130-24770045    | 0.916   |
| <b>Slitrk3</b>       | 0 | 0 | 0 | 6    | 0.1      | 0.017171 | 1.323181 | Unclassified | chr3:72852046-72862865    | 8.82    |
| <b>V1rd10</b>        | 0 | 0 | 0 | 0    | 0        | 0        | 0        | Unclassified | chr7:5405428-5408361      | 0.934   |
| <b>V1rd11</b>        | 0 | 0 | 0 | 1    | 0.016667 | 0.005474 | 0        | Unclassified | chr7:5835181-5838144      | 0.964   |
| <b>V1rd17</b>        | 0 | 0 | 0 | 2    | 0.033333 | 0        | 2        | Unclassified | chr7:24711404-24714376    | 0.973   |

|                      |   |   |   |      |          |          |          |              |                           |         |
|----------------------|---|---|---|------|----------|----------|----------|--------------|---------------------------|---------|
| <b>1190002N15Rik</b> | 0 | 0 | 0 | 186  | 3.1      | 2.45908  | 34.10895 | Stalled      | chr9:94418282-94440500    | 20.219  |
| <b>Ap1s1</b>         | 0 | 0 | 0 | 184  | 3.066667 | 36.454   | 6.707891 | Unclassified | chr5:137510863-137523930  | 11.068  |
| <b>Sncb</b>          | 0 | 0 | 0 | 25   | 0.416667 | 0.439058 | 3.187924 | Unclassified | chr13:54860220-54869801   | 7.582   |
| <b>Cyb5r1</b>        | 0 | 0 | 0 | 72   | 1.2      | 1.34108  | 0.50741  | Unclassified | chr4:106740772-106757410  | 14.639  |
| <b>Zfp575</b>        | 0 | 0 | 0 | 29   | 0.483333 | 0.477022 | 2.438247 | Unclassified | chr7:25368856-25374660    | 3.805   |
| <b>Wtip</b>          | 0 | 0 | 0 | 29   | 0.483333 | 0.252127 | 1.428398 | Unclassified | chr7:34894566-34920287    | 23.722  |
| <b>Strbp</b>         | 0 | 0 | 0 | 382  | 6.366667 | 2.76012  | 0.505607 | Unclassified | chr2:37425389-37504805    | 77.417  |
| <b>Spock1</b>        | 0 | 0 | 0 | 460  | 7.666667 | 0.088746 | 2.053866 | Unclassified | chr13:57527451-58011693   | 482.243 |
| <b>Bambi</b>         | 0 | 0 | 0 | 93   | 1.55     | 0.747466 | 15.90151 | Stalled      | chr18:3505954-3516402     | 8.449   |
| <b>Spop</b>          | 0 | 0 | 0 | 1099 | 18.31667 | 23.1181  | 12.94192 | Unclassified | chr11:95273396-95354724   | 79.329  |
| <b>Spnb3</b>         | 0 | 0 | 0 | 172  | 2.866667 | 0.085598 | 0        | Unclassified | chr19:4709222-4752352     | 41.131  |
| <b>Csgalnact2</b>    | 0 | 0 | 0 | 243  | 4.05     | 1.36908  | 27.72404 | Stalled      | chr6:118057470-118091158  | 31.689  |
| <b>Esrgr</b>         | 0 | 0 | 0 | 149  | 2.483333 | 0.082776 | 1.190143 | Unclassified | chr1:189819737-190038763  | 217.027 |
| <b>Olfr1223</b>      | 0 | 0 | 0 | 0    | 0        | 0.020878 | 0        | Unclassified | chr2:88984242-88993493    | 7.252   |
| <b>Gm4951</b>        | 0 | 0 | 0 | 19   | 0.316667 | 0.065311 | 0.684698 | Unclassified | chr18:60369730-60404774   | 35.745  |
| <b>Perp</b>          | 0 | 0 | 0 | 27   | 0.45     | 0.59871  | 5.261618 | Unclassified | chr10:18562876-18576878   | 12.003  |
| <b>Oxct2a</b>        | 0 | 0 | 0 | 2    | 0.033333 | 0.498178 | 2        | Unclassified | chr4:122999118-123002877  | 1.76    |
| <b>Adamts19</b>      | 0 | 0 | 0 | 97   | 1.616667 | 0        | 0        | Unclassified | chr18:58994417-59213332   | 216.916 |
| <b>Sv2a</b>          | 0 | 0 | 0 | 207  | 3.45     | 1.966    | 5.071001 | Unclassified | chr3:95983149-95999103    | 13.955  |
| <b>Thsd4</b>         | 0 | 0 | 0 | 612  | 10.2     | 0.038742 | 0        | Unclassified | chr9:59814738-60360842    | 544.105 |
| <b>1700016K19Rik</b> | 0 | 0 | 0 | 37   | 0.616667 | 3.97949  | 3.056517 | Unclassified | chr11:75811413-75817071   | 3.659   |
| <b>D130040H23Rik</b> | 0 | 0 | 0 | 264  | 4.4      | 1.83862  | 31.89571 | Stalled      | chr8:71792978-71827274    | 32.297  |
| <b>0610040J01Rik</b> | 0 | 0 | 0 | 99   | 1.65     | 0.082244 | 2.917449 | Unclassified | chr5:64201733-64290858    | 87.126  |
| <b>Grit</b>          | 0 | 0 | 0 | 123  | 2.05     | 0.093673 | 1.102344 | Unclassified | chr9:31921720-32072082    | 148.363 |
| <b>Tnnc2</b>         | 0 | 0 | 0 | 7    | 0.116667 | 0.037041 | 2.445998 | Unclassified | chr2:164602661-164607234  | 2.574   |
| <b>Tnnc1</b>         | 0 | 0 | 0 | 12   | 0.2      | 0.072924 | 0.375098 | Unclassified | chr14:32019497-32024897   | 3.401   |
| <b>Tnc</b>           | 0 | 0 | 0 | 95   | 1.583333 | 0.230619 | 0        | Unclassified | chr4:63620818-63683760    | 60.943  |
| <b>Clec3b</b>        | 0 | 0 | 0 | 21   | 0.35     | 0.310072 | 0.844828 | Unclassified | chr9:123058063-123066550  | 6.488   |
| <b>Csnk1g1</b>       | 0 | 0 | 0 | 857  | 14.28333 | 3.54844  | 31.86116 | Stalled      | chr9:65754816-65892821    | 136.006 |
| <b>Adcy8</b>         | 0 | 0 | 0 | 136  | 2.266667 | 0.073759 | 1.258343 | Unclassified | chr15:64530596-64755858   | 223.263 |
| <b>Tnfaip2</b>       | 0 | 0 | 0 | 36   | 0.6      | 0.441571 | 2.072864 | Unclassified | chr12:112678871-112693229 | 12.359  |
| <b>Sic22a5</b>       | 0 | 0 | 0 | 292  | 4.866667 | 4.1186   | 25.27207 | Stalled      | chr11:53678047-53707205   | 27.159  |
| <b>Sic22a12</b>      | 0 | 0 | 0 | 28   | 0.466667 | 0.176345 | 1.101503 | Unclassified | chr19:6535855-6545070     | 7.216   |
| <b>Sic23a1</b>       | 0 | 0 | 0 | 672  | 11.2     | 1.09769  | 1.030489 | Elongating   | chr18:35774257-35788872   | 12.616  |
| <b>Sic25a14</b>      | 0 | 0 | 0 | 94   | 1.566667 | 3.39303  | 19.79992 | Stalled      | chrX:45974756-46015469    | 38.714  |
| <b>Sic25a17</b>      | 0 | 0 | 0 | 424  | 7.066667 | 15.9279  | 18.65918 | Unclassified | chr15:81149350-81193195   | 41.846  |
| <b>Sic2a2</b>        | 0 | 0 | 0 | 27   | 0.45     | 0.049869 | 0.540939 | Unclassified | chr3:28594824-28627282    | 30.459  |
| <b>Sic2a3</b>        | 0 | 0 | 0 | 150  | 2.5      | 5.4597   | 4.415422 | Unclassified | chr6:122677828-122694763  | 14.936  |
| <b>Sic11a1</b>       | 0 | 0 | 0 | 56   | 0.933333 | 0.377951 | 0.477769 | Unclassified | chr1:74419776-74432625    | 10.85   |
| <b>Olfr45</b>        | 0 | 0 | 0 | 3    | 0.05     | 0.030202 | 3        | Unclassified | chr7:147874805-147877741  | 0.937   |
| <b>Hbb-bh1</b>       | 0 | 0 | 0 | 3    | 0.05     | 0.105052 | 0.689384 | Unclassified | chr7:110990151-110993676  | 1.526   |
| <b>Spint4</b>        | 0 | 0 | 0 | 6    | 0.1      | 0.05154  | 0.595878 | Unclassified | chr2:164522000-164527948  | 3.949   |
| <b>Fam189a1</b>      | 0 | 0 | 0 | 658  | 10.96667 | 0.115924 | 0.758347 | Unclassified | chr7:1900981-72303414     | 400.434 |
| <b>Spin2</b>         | 0 | 0 | 0 | 22   | 0.366667 | 1.13808  | 3.25985  | Unclassified | chrX:150264835-150268783  | 1.949   |
| <b>Barhl1</b>        | 0 | 0 | 0 | 141  | 2.35     | 0.177908 | 1.038566 | Elongating   | chr2:28763199-28773941    | 8.743   |
| <b>Cldn8</b>         | 0 | 0 | 0 | 4    | 0.066667 | 0.021741 | 2        | Unclassified | chr16:88561070-88565428   | 2.359   |
| <b>Btn1a1</b>        | 0 | 0 | 0 | 23   | 0.383333 | 1.56477  | 0.952629 | Unclassified | chr13:23548861-23559770   | 8.91    |
| <b>Dnmt3l</b>        | 0 | 0 | 0 | 173  | 2.883333 | 0.10592  | 4.196656 | Unclassified | chr10:77503031-77526360   | 21.33   |
| <b>Gsc2</b>          | 0 | 0 | 0 | 6    | 0.1      | 0.936918 | 0        | Unclassified | chr16:17913646-17917152   | 1.507   |
| <b>Aktip</b>         | 0 | 0 | 0 | 155  | 2.583333 | 2.94951  | 0.274977 | Unclassified | chr8:93647397-93661395    | 11.999  |
| <b>CommD3</b>        | 0 | 0 | 0 | 180  | 3        | 33.9914  | 20.44826 | Stalled      | chr2:18592088-18597843    | 3.756   |
| <b>Ptch2</b>         | 0 | 0 | 0 | 63   | 1.05     | 0.05778  | 0.926216 | Unclassified | chr4:116766960-116787436  | 18.477  |
| <b>Rnf214</b>        | 0 | 0 | 0 | 536  | 8.933333 | 5.63611  | 69.43504 | Stalled      | chr9:45671773-45716960    | 43.188  |
| <b>Serpinc1</b>      | 0 | 0 | 0 | 118  | 1.966667 | 0.450824 | 1.542435 | Unclassified | chr1:162906736-162933143  | 24.408  |
| <b>Spag11a</b>       | 0 | 0 | 0 | 2    | 0.033333 | 0        | 0        | Unclassified | chr8:19155886-19159578    | 1.693   |
| <b>Lefty2</b>        | 0 | 0 | 0 | 12   | 0.2      | 0.220891 | 0.767809 | Unclassified | chr1:182821249-182829233  | 5.985   |
| <b>Inpp4b</b>        | 0 | 0 | 0 | 755  | 12.58333 | 0.525377 | 0.350808 | Unclassified | chr8:84237098-84646460    | 407.363 |
| <b>Pgrmc2</b>        | 0 | 0 | 0 | 472  | 7.866667 | 17.4833  | 38.22806 | Unclassified | chr3:40870249-40888968    | 16.72   |
| <b>Fam19a5</b>       | 0 | 0 | 0 | 143  | 2.383333 | 0.044313 | 0        | Unclassified | chr15:87453659-87589794   | 134.136 |
| <b>Dbx2</b>          | 0 | 0 | 0 | 31   | 0.516667 | 0.067722 | 1.074898 | Unclassified | chr15:95453993-95487202   | 31.21   |
| <b>Tcl1</b>          | 0 | 0 | 0 | 11   | 0.183333 | 0        | 1.663161 | Unclassified | chr12:106454966-106462947 | 5.982   |
| <b>Gipr</b>          | 0 | 0 | 0 | 62   | 1.033333 | 0.428919 | 0.369393 | Unclassified | chr7:19742473-19753476    | 9.004   |
| <b>Hipk4</b>         | 0 | 0 | 0 | 49   | 0.816667 | 0.084947 | 0.884365 | Unclassified | chr7:28306279-28316193    | 7.915   |
| <b>Olfr1132</b>      | 0 | 0 | 0 | 1    | 0.016667 | 0        | 1        | Unclassified | chr2:87474975-87477902    | 0.928   |
| <b>Olfr1270</b>      | 0 | 0 | 0 | 2    | 0.033333 | 0        | 0        | Unclassified | chr2:89989246-89992161    | 0.916   |
| <b>Tmem144</b>       | 0 | 0 | 0 | 131  | 2.183333 | 0.687787 | 16.2901  | Stalled      | chr3:79617074-79648584    | 29.511  |
| <b>Prx</b>           | 0 | 0 | 0 | 192  | 3.2      | 0.595776 | 0.287562 | Unclassified | chr7:28282342-28305060    | 20.719  |
| <b>Rfk</b>           | 0 | 0 | 0 | 172  | 2.866667 | 6.36248  | 28.30341 | Stalled      | chr19:17466532-17475837   | 7.306   |
| <b>Gabbr1</b>        | 0 | 0 | 0 | 453  | 7.55     | 9.74644  | 7.090237 | Unclassified | chr17:37180910-37211250   | 28.341  |
| <b>Crif3</b>         | 0 | 0 | 0 | 1135 | 18.91667 | 30.1178  | 15.24208 | Unclassified | chr11:79860000-79896457   | 34.458  |
| <b>Irgm2</b>         | 0 | 0 | 0 | 185  | 3.083333 | 4.97859  | 5.758922 | Unclassified | chr11:58026478-58036282   | 7.805   |
| <b>Ppt2</b>          | 0 | 0 | 0 | 52   | 0.866667 | 2.7271   | 2.505177 | Unclassified | chr17:34753606-34766042   | 10.437  |
| <b>Sic25a26</b>      | 0 | 0 | 0 | 508  | 8.466667 | 2.60779  | 9.970026 | Unclassified | chr6:94448307-94554644    | 104.338 |
| <b>Thoc2</b>         | 0 | 0 | 0 | 650  | 10.83333 | 5.05775  | 28.49702 | Stalled      | chrX:39148170-39267078    | 116.909 |
| <b>Lrrc18</b>        | 0 | 0 | 0 | 877  | 14.61667 | 0        | 0.902357 | Unclassified | chr14:33802567-33828478   | 23.912  |
| <b>Aph1a</b>         | 0 | 0 | 0 | 113  | 1.883333 | 16.8273  | 6.536718 | Unclassified | chr3:95695918-95702213    | 4.296   |
| <b>Krt36</b>         | 0 | 0 | 0 | 10   | 0.166667 | 0.025044 | 0.340297 | Unclassified | chr11:99963328-99969422   | 4.095   |
| <b>Krt34</b>         | 0 | 0 | 0 | 4    | 0.066667 | 0        | 0        | Unclassified | chr11:99898664-99904868   | 4.205   |
| <b>Il17rc</b>        | 0 | 0 | 0 | 190  | 3.166667 | 2.16615  | 0.162976 | Unclassified | chr6:113419448-113433132  | 11.685  |
| <b>Gm561</b>         | 0 | 0 | 0 | 83   | 1.383333 | 13.3732  | 16.93241 | Unclassified | chr2:144417800-144421101  | 1.302   |
| <b>Cxx1b</b>         | 0 | 0 | 0 | 24   | 0.4      | 10.6558  | 21       | Unclassified | chrX:50972353-50975585    | 1.233   |
| <b>Ubxn2b</b>        | 0 | 0 | 0 | 281  | 4.683333 | 1.87553  | 22.6489  | Stalled      | chr4:6116251-6146935      | 28.685  |
| <b>Manea</b>         | 0 | 0 | 0 | 452  | 7.533333 | 5.53574  | 20.30373 | Unclassified | chr4:26251652-26275799    | 22.148  |
| <b>Nipa1</b>         | 0 | 0 | 0 | 68   | 1.133333 | 1.01645  | 1.982916 | Unclassified | chr7:63233853-63276943    | 41.091  |
| <b>Snord22</b>       | 0 | 0 | 0 | 248  | 4.133333 | 9.96543  | 115      | Unclassified | chr19:8798355-8800481     | 0.127   |
| <b>Adam32</b>        | 0 | 0 | 0 | 182  | 3.033333 | 0.062851 | 18.86642 | Stalled      | chr8:25946614-26061276    | 112.663 |



|               |   |   |   |      |          |          |          |              |                           |         |
|---------------|---|---|---|------|----------|----------|----------|--------------|---------------------------|---------|
| Mul1          | 0 | 0 | 0 | 378  | 6.3      | 6.06589  | 5.394879 | Unclassified | chr4:137988586-137998180  | 7.595   |
| Ptcd1         | 0 | 0 | 0 | 638  | 10.63333 | 6.00936  | 14.46593 | Unclassified | chr5:145908246-145929973  | 19.728  |
| A530016L24Rik | 0 | 0 | 0 | 17   | 0.283333 | 0        | 0        | Unclassified | chr12:113725658-113738138 | 10.481  |
| Ppm1f         | 0 | 0 | 0 | 283  | 4.716667 | 7.97559  | 1.069689 | Unclassified | chr16:16901413-16927455   | 24.043  |
| Taf2          | 0 | 0 | 0 | 647  | 10.78333 | 8.57192  | 25.41084 | Unclassified | chr15:54846683-54905707   | 57.025  |
| Pmvk          | 0 | 0 | 0 | 242  | 4.033333 | 63.5336  | 10.71405 | Unclassified | chr3:89261039-89272930    | 9.892   |
| Olfr1282      | 0 | 0 | 0 | 0    | 0        | 0.019704 | 0        | Unclassified | chr2:111175315-111178233  | 0.919   |
| 4930433I11Rik | 0 | 0 | 0 | 5    | 0.083333 | 0.024782 | 0.608802 | Unclassified | chr7:48240978-48250202    | 7.225   |
| Narg1         | 0 | 0 | 0 | 1210 | 20.16667 | 12.8407  | 20.55401 | Unclassified | chr3:51217937-51279906    | 59.97   |
| Hdhd1a        | 0 | 0 | 0 | 3    | 0.05     | 0        | 1        | Unclassified | chr18:50727309-50730353   | 1.045   |
| Stk36         | 0 | 0 | 0 | 181  | 3.016667 | 0.269353 | 52.2198  | Stalled      | chr1:74646028-74683467    | 35.44   |
| Olfr1221      | 0 | 0 | 0 | 1    | 0.016667 | 0.027385 | 1        | Unclassified | chr2:88951731-88954667    | 0.937   |
| Kcnj11        | 0 | 0 | 0 | 6    | 0.1      | 0.166662 | 0.509443 | Unclassified | chr7:53352531-53357607    | 3.077   |
| Zfp523        | 0 | 0 | 0 | 353  | 5.883333 | 3.8068   | 14.66657 | Unclassified | chr17:28312362-28342829   | 28.468  |
| Cyp2j12       | 0 | 0 | 0 | 26   | 0.433333 | 0.033973 | 0.63723  | Unclassified | chr4:95766333-95809733    | 41.401  |
| Ccdc40        | 0 | 0 | 0 | 300  | 5        | 1.02169  | 3.031952 | Unclassified | chr11:119087885-119126526 | 36.642  |
| Rxcc4         | 0 | 0 | 0 | 645  | 10.75    | 2.24679  | 90.89546 | Stalled      | chr13:89988525-90231213   | 240.689 |
| Xrxfp4        | 0 | 0 | 0 | 17   | 0.283333 | 0.061765 | 0.521432 | Unclassified | chr3:88455819-88459064    | 1.246   |
| Gabbr1        | 0 | 0 | 0 | 47   | 0.783333 | 0.139487 | 0        | Unclassified | chr4:33217530-33250563    | 31.034  |
| Gm13280       | 0 | 0 | 0 | 0    | 0        | 0        | 0        | Unclassified | chr4:88322190-88324760    | 0.571   |
| Gabre         | 0 | 0 | 0 | 4    | 0.066667 | 0.013776 | 0.844487 | Unclassified | chrX:69502770-69522060    | 17.291  |
| Gabrg1        | 0 | 0 | 0 | 28   | 0.466667 | 0.016118 | 0.776962 | Unclassified | chr5:71142285-71235856    | 91.572  |
| Gabrg2        | 0 | 0 | 0 | 38   | 0.633333 | 0.038892 | 0.713113 | Unclassified | chr11:41723696-41816180   | 90.485  |
| Gabrg3        | 0 | 0 | 0 | 348  | 5.8      | 0.022982 | 1.975743 | Unclassified | chr7:63979611-64644241    | 662.631 |
| Rps4y2        | 0 | 0 | 0 | 7    | 0.116667 | 5.15216  | 7        | Unclassified | chr6:148301177-148304118  | 0.942   |
| Pmch          | 0 | 0 | 0 | 1    | 0.016667 | 0.039643 | 1        | Unclassified | chr10:87551816-87555119   | 1.304   |
| Gabrb3        | 0 | 0 | 0 | 130  | 2.166667 | 0.009323 | 1.299147 | Unclassified | chr7:64843903-65084171    | 238.269 |
| Gabrd         | 0 | 0 | 0 | 33   | 0.55     | 0.095492 | 1.630001 | Unclassified | chr4:154759087-154774178  | 13.092  |
| Pbp2          | 0 | 0 | 0 | 4    | 0.066667 | 0.040816 | 2        | Unclassified | chr6:135259146-135262402  | 1.257   |
| Sic35d3       | 0 | 0 | 0 | 26   | 0.433333 | 1.34062  | 1.983368 | Unclassified | chr10:19567722-19573265   | 3.544   |
| 2610008E11Rik | 0 | 0 | 0 | 177  | 2.95     | 1.04396  | 11.70867 | Stalled      | chr10:78527118-78562302   | 33.185  |
| Abcc3         | 0 | 0 | 0 | 124  | 2.066667 | 0.069181 | 1.762993 | Unclassified | chr11:94204608-94256290   | 49.683  |
| Fam123a       | 0 | 0 | 0 | 7    | 0.116667 | 0.288457 | 0        | Unclassified | chr14:60995122-60999839   | 2.718   |
| Dennd2d       | 0 | 0 | 0 | 291  | 4.85     | 3.80991  | 7.692498 | Unclassified | chr3:106283348-106303972  | 18.625  |
| Tbc1d2b       | 0 | 0 | 0 | 124  | 2.066667 | 1.01079  | 3.726681 | Unclassified | chr9:90096886-90167607    | 68.722  |
| Sei12         | 0 | 0 | 0 | 80   | 1.333333 | 0.034654 | 0.670683 | Unclassified | chr2:140055593-140217446  | 159.854 |
| Cpeb1         | 0 | 0 | 0 | 85   | 1.416667 | 0.073601 | 2.319098 | Unclassified | chr7:88492328-88601562    | 107.235 |
| Epha3         | 0 | 0 | 0 | 157  | 2.616667 | 0.03544  | 1.344527 | Unclassified | chr16:63545043-63865983   | 318.941 |
| Stom          | 0 | 0 | 0 | 125  | 2.083333 | 2.1248   | 20.52727 | Stalled      | chr2:35169509-35194529    | 23.021  |
| Epc1          | 0 | 0 | 0 | 2332 | 38.86667 | 11.9791  | 15.87413 | Unclassified | chr18:6435948-6518085     | 80.138  |
| Myh10         | 0 | 0 | 0 | 397  | 6.616667 | 0.420831 | 1.937863 | Unclassified | chr11:68503416-68630126   | 124.711 |
| Bcl9          | 0 | 0 | 0 | 264  | 4.4      | 5.3083   | 0.566081 | Unclassified | chr3:97008550-97022430    | 11.881  |
| Gm5736        | 0 | 0 | 0 | 1    | 0.016667 | 0.091709 | 0        | Unclassified | chr7:110987637-110991035  | 1.399   |
| Fam115a       | 0 | 0 | 0 | 20   | 0.333333 | 0.044573 | 0.549473 | Unclassified | chr6:42622545-42645058    | 20.514  |
| Vps33a        | 0 | 0 | 0 | 418  | 6.966667 | 8.56678  | 21.46721 | Unclassified | chr5:123978770-124025024  | 44.255  |
| Epha5         | 0 | 0 | 0 | 135  | 2.25     | 0.054313 | 0        | Unclassified | chr5:84483787-84848407    | 362.621 |
| Zdhhc6        | 0 | 0 | 0 | 744  | 12.4     | 12.3943  | 22.98772 | Unclassified | chr19:55372788-55392522   | 17.735  |
| Olfr212       | 0 | 0 | 0 | 5    | 0.083333 | 0.287122 | 0        | Unclassified | chr6:116454533-116467983  | 11.451  |
| Kcnj15        | 0 | 0 | 0 | 78   | 1.3      | 0.173367 | 0.353791 | Unclassified | chr16:95477257-95521865   | 42.609  |
| Pion          | 0 | 0 | 0 | 286  | 4.766667 | 1.74164  | 21.7686  | Stalled      | chr5:20690084-20797519    | 105.436 |
| Defb21        | 0 | 0 | 0 | 8    | 0.133333 | 0        | 0.230917 | Unclassified | chr2:152396479-152400679  | 2.201   |
| Atpaf1        | 0 | 0 | 0 | 379  | 6.316667 | 4.88253  | 25.98894 | Unclassified | chr4:115455589-115484896  | 27.308  |
| 4732418C07Rik | 0 | 0 | 0 | 573  | 9.55     | 6.13111  | 15.68264 | Unclassified | chr4:115408677-115449932  | 39.256  |
| Ctct811       | 0 | 0 | 0 | 3    | 0.05     | 0.019607 | 0.324781 | Unclassified | chr5:25019884-25023845    | 1.962   |
| Tomm70a       | 0 | 0 | 0 | 763  | 12.71667 | 14.979   | 19.57226 | Unclassified | chr16:57119826-57154643   | 32.818  |
| Actr3b        | 0 | 0 | 0 | 276  | 4.6      | 2.23197  | 21.15521 | Stalled      | chr5:25263843-25356159    | 90.317  |
| Plekhg1       | 0 | 0 | 0 | 212  | 3.533333 | 0.060123 | 2.101995 | Unclassified | chr10:6379240-6608164     | 226.925 |
| Mppe1         | 0 | 0 | 0 | 449  | 7.483333 | 7.09741  | 19.09466 | Unclassified | chr18:67385183-67407484   | 20.302  |
| Ripk4         | 0 | 0 | 0 | 31   | 0.516667 | 0.122748 | 1.741295 | Unclassified | chr16:97963548-97987362   | 21.815  |
| Slmo1         | 0 | 0 | 0 | 52   | 0.866667 | 0.472981 | 4.940537 | Unclassified | chr18:67622502-67640235   | 15.734  |
| Vsx1          | 0 | 0 | 0 | 17   | 0.283333 | 0.097039 | 2.890185 | Unclassified | chr2:150506439-150516873  | 8.435   |
| Sic35e4       | 0 | 0 | 0 | 90   | 1.5      | 3.12075  | 4.110256 | Unclassified | chr11:3807024-3816667     | 7.644   |
| 6330403K07Rik | 0 | 0 | 0 | 23   | 0.383333 | 0.473193 | 0.571455 | Unclassified | chr11:70845442-70849119   | 1.678   |
| Chrm5         | 0 | 0 | 0 | 4    | 0.066667 | 0.080744 | 0.42759  | Unclassified | chr2:112319228-112322974  | 1.747   |
| Ccdc106       | 0 | 0 | 0 | 95   | 1.583333 | 1.3043   | 0.291221 | Unclassified | chr7:5006327-5012386      | 4.06    |
| Atmin         | 0 | 0 | 0 | 278  | 4.633333 | 5.90262  | 5.857793 | Unclassified | chr8:119465292-119484344  | 17.053  |
| Smad1         | 0 | 0 | 0 | 371  | 6.183333 | 2.14248  | 11.94038 | Stalled      | chr8:81862297-81925367    | 61.071  |
| Mia2          | 0 | 0 | 0 | 9    | 0.15     | 0        | 1.345407 | Unclassified | chr12:60194786-60210117   | 13.332  |
| Amhr2         | 0 | 0 | 0 | 25   | 0.416667 | 0.092156 | 0.877909 | Unclassified | chr15:102273797-102285070 | 9.274   |
| Spata18       | 0 | 0 | 0 | 33   | 0.55     | 0.782927 | 2.041616 | Unclassified | chr5:74040618-74070722    | 28.105  |
| Iws1          | 0 | 0 | 0 | 996  | 16.6     | 5.15765  | 20.88749 | Unclassified | chr18:32225387-32263985   | 36.599  |
| Kif2b         | 0 | 0 | 0 | 2    | 0.033333 | 0.011292 | 0        | Unclassified | chr11:91436599-91440869   | 2.271   |
| Clca3         | 0 | 0 | 0 | 30   | 0.5      | 0.048034 | 1.534964 | Unclassified | chr3:144667500-144697740  | 28.241  |
| Trim59        | 0 | 0 | 0 | 580  | 9.666667 | 5.86602  | 12.42144 | Unclassified | chr3:68839215-68850664    | 9.45    |
| 9230105E10Rik | 0 | 0 | 0 | 184  | 3.066667 | 6.62801  | 14.45251 | Stalled      | chr7:111487268-111503872  | 14.605  |
| Ttc15         | 0 | 0 | 0 | 1085 | 18.08333 | 10.3134  | 11.25211 | Unclassified | chr12:29375492-29437318   | 59.827  |
| Foxj3         | 0 | 0 | 0 | 926  | 15.43333 | 4.28476  | 32.42644 | Unclassified | chr4:119210292-119301724  | 89.433  |
| Crisp3        | 0 | 0 | 0 | 6    | 0.1      | 0.147823 | 0        | Unclassified | chr17:40358725-40381207   | 20.483  |
| Crisp1        | 0 | 0 | 0 | 13   | 0.216667 | 0.022596 | 0.689713 | Unclassified | chr17:40430706-40458156   | 25.451  |
| Npsr1         | 0 | 0 | 0 | 105  | 1.75     | 0.027046 | 0.676398 | Unclassified | chr9:23900461-24120842    | 218.382 |
| Me3           | 0 | 0 | 0 | 185  | 3.083333 | 0.167169 | 1.643623 | Unclassified | chr7:96779327-97002869    | 221.543 |
| Arpc1b        | 0 | 0 | 0 | 1628 | 27.13333 | 209.833  | 3.83439  | Unclassified | chr5:145873124-145889055  | 13.932  |
| Raly          | 0 | 0 | 0 | 1500 | 25       | 103.569  | 29.09338 | Unclassified | chr2:154614845-154692995  | 76.151  |
| Ran           | 0 | 0 | 0 | 807  | 13.45    | 99.7971  | 11.66706 | Unclassified | chr5:129524030-129530196  | 4.167   |
| Gm6592        | 0 | 0 | 0 | 2    | 0.033333 | 0.050558 | 0        | Unclassified | chrX:8419119-8426733      | 5.615   |
| Upk3a         | 0 | 0 | 0 | 9    | 0.15     | 0.023176 | 1.574991 | Unclassified | chr15:84845570-84852990   | 5.421   |

|               |   |   |   |      |          |          |          |              |                           |         |
|---------------|---|---|---|------|----------|----------|----------|--------------|---------------------------|---------|
| Upp1          | 0 | 0 | 0 | 15   | 0.25     | 0.465678 | 0.58852  | Unclassified | chr11:9016010-9036172     | 18.163  |
| Car7          | 0 | 0 | 0 | 26   | 0.433333 | 0.233327 | 0.89754  | Unclassified | chr8:107062706-107074243  | 9.538   |
| Urod          | 0 | 0 | 0 | 92   | 1.533333 | 14.9607  | 8.777778 | Unclassified | chr4:116662821-116668980  | 4.16    |
| Lsm14b        | 0 | 0 | 0 | 358  | 5.966667 | 12.2145  | 8.928982 | Unclassified | chr2:179757691-179770166  | 10.476  |
| Pot1a         | 0 | 0 | 0 | 400  | 6.666667 | 2.0749   | 45.13439 | Stalled      | chr6:25693734-25761226    | 65.493  |
| Lrrc30        | 0 | 0 | 0 | 1    | 0.016667 | 0.029145 | 0        | Unclassified | chr17:67980304-67984063   | 1.76    |
| Slc36a1       | 0 | 0 | 0 | 227  | 3.783333 | 2.17338  | 7.787248 | Unclassified | chr11:55015841-55049832   | 31.992  |
| Hnrnpa3       | 0 | 0 | 0 | 1014 | 16.9     | 0        | 13.41361 | Unclassified | chr2:75495315-75507464    | 10.15   |
| Phc3          | 0 | 0 | 0 | 918  | 15.3     | 3.39443  | 13.26714 | Unclassified | chr3:30798217-30870337    | 70.121  |
| Cplx3         | 0 | 0 | 0 | 22   | 0.366667 | 0.040373 | 1.042733 | Unclassified | chr9:57447800-57456088    | 6.289   |
| Ireb2         | 0 | 0 | 0 | 808  | 13.46667 | 6.48012  | 17.30349 | Unclassified | chr9:54709561-54760341    | 48.781  |
| Dnm1l         | 0 | 0 | 0 | 481  | 8.016667 | 11.2404  | 27.61042 | Unclassified | chr16:16312325-16361123   | 46.799  |
| Btbd11        | 0 | 0 | 0 | 329  | 5.483333 | 0.4318   | 1.830322 | Unclassified | chr10:84847558-85123037   | 273.48  |
| Psd2          | 0 | 0 | 0 | 85   | 1.416667 | 0.153072 | 1.517109 | Unclassified | chr18:36122488-36174369   | 49.882  |
| Slc35d1       | 0 | 0 | 0 | 662  | 11.03333 | 3.1273   | 30.21634 | Unclassified | chr4:102844322-102889489  | 43.168  |
| Wdr78         | 0 | 0 | 0 | 432  | 7.2      | 1.18961  | 87.0066  | Stalled      | chr4:102710670-102788904  | 76.235  |
| Ptdss2        | 0 | 0 | 0 | 187  | 3.116667 | 6.98512  | 7.061686 | Unclassified | chr7:148315184-148342053  | 24.87   |
| Akr1c13       | 0 | 0 | 0 | 9    | 0.15     | 0.249545 | 0.626482 | Unclassified | chr13:4188432-4204849     | 14.418  |
| Sh2d3c        | 0 | 0 | 0 | 455  | 7.583333 | 8.38341  | 4.967556 | Unclassified | chr2:32574591-32610514    | 33.924  |
| Npas3         | 0 | 0 | 0 | 540  | 9        | 0.172221 | 1.815006 | Unclassified | chr12:54347663-55173162   | 823.5   |
| Tcl1b2        | 0 | 0 | 0 | 4    | 0.066667 | 0.048556 | 0        | Unclassified | chr12:106383242-106393435 | 8.194   |
| Tcl1b4        | 0 | 0 | 0 | 3    | 0.05     | 0        | 0.641127 | Unclassified | chr12:106438631-106445203 | 4.573   |
| Tcl1b5        | 0 | 0 | 0 | 8    | 0.133333 | 0.072763 | 0.972911 | Unclassified | chr12:106412567-106419355 | 4.789   |
| Pcsk7         | 0 | 0 | 0 | 647  | 10.78333 | 10.0772  | 24.01992 | Unclassified | chr9:45712651-45737805    | 23.155  |
| Cmtm2a        | 0 | 0 | 0 | 10   | 0.166667 | 0.188722 | 2.599848 | Unclassified | chr8:106804941-106819081  | 12.141  |
| Prrs52        | 0 | 0 | 0 | 29   | 0.483333 | 0        | 0.489689 | Unclassified | chr14:64721159-64732588   | 9.43    |
| 1700058C13Rik | 0 | 0 | 0 | 15   | 0.25     | 0.035113 | 0.333651 | Unclassified | chr2:153954082-153964091  | 8.01    |
| Hbp1          | 0 | 0 | 0 | 357  | 5.95     | 5.68925  | 5.264214 | Unclassified | chr12:32611319-32637400   | 24.082  |
| Gprin2        | 0 | 0 | 0 | 21   | 0.35     | 0.49641  | 3.260975 | Unclassified | chr14:35007627-35016819   | 7.193   |
| AU042651      | 0 | 0 | 0 | 37   | 0.616667 | 0.248113 | 0        | Unclassified | chr13:56537715-56573724   | 34.01   |
| Onecut1       | 0 | 0 | 0 | 45   | 0.75     | 0.674718 | 1.201654 | Unclassified | chr9:74707727-74737454    | 27.728  |
| Retn          | 0 | 0 | 0 | 12   | 0.2      | 0.125987 | 0.739261 | Unclassified | chr8:3653788-3658095      | 2.308   |
| Apba3         | 0 | 0 | 0 | 82   | 1.366667 | 14.7659  | 3.501068 | Unclassified | chr10:80728916-80735991   | 5.076   |
| Cxcl14        | 0 | 0 | 0 | 15   | 0.25     | 0.077249 | 2.171235 | Unclassified | chr13:56390005-56399912   | 7.908   |
| Gm806         | 0 | 0 | 0 | 15   | 0.25     | 0.02515  | 0.439252 | Unclassified | chr13:50560675-50570724   | 8.05    |
| Ltb4r2        | 0 | 0 | 0 | 17   | 0.283333 | 3.31256  | 8        | Unclassified | chr14:56378760-56381843   | 1.084   |
| Retnlb        | 0 | 0 | 0 | 2    | 0.033333 | 0        | 0.509082 | Unclassified | chr16:48814968-48819004   | 2.037   |
| Retnla        | 0 | 0 | 0 | 7    | 0.116667 | 0        | 0.154119 | Unclassified | chr16:48840664-48844574   | 1.911   |
| Slc30a6       | 0 | 0 | 0 | 482  | 8.033333 | 3.10766  | 27.64425 | Unclassified | chr17:74792971-74823569   | 28.599  |
| Extl3         | 0 | 0 | 0 | 546  | 9.1      | 7.2187   | 9.96787  | Unclassified | chr14:65670896-65718943   | 46.048  |
| Olfr646       | 0 | 0 | 0 | 3    | 0.05     | 0.027298 | 2        | Unclassified | chr7:111252794-111255733  | 0.94    |
| Rdh14         | 0 | 0 | 0 | 250  | 4.166667 | 9.28889  | 22.84916 | Stalled      | chr12:10395585-10402368   | 4.784   |
| Azi1          | 0 | 0 | 0 | 149  | 2.483333 | 2.54619  | 10.36707 | Stalled      | chr11:119925743-119950141 | 22.399  |
| Axin2         | 0 | 0 | 0 | 62   | 1.033333 | 0.180596 | 1.722616 | Unclassified | chr11:108779662-108812095 | 30.434  |
| Olfr652       | 0 | 0 | 0 | 2    | 0.033333 | 0.080353 | 1        | Unclassified | chr7:111710665-111713726  | 1.062   |
| Olfr362       | 0 | 0 | 0 | 2    | 0.033333 | 0.026869 | 1        | Unclassified | chr2:36960214-36963168    | 0.955   |
| Olfr582       | 0 | 0 | 0 | 2    | 0.033333 | 0.032192 | 2        | Unclassified | chr7:110187994-110190954  | 0.961   |
| Olfr589       | 0 | 0 | 0 | 1    | 0.016667 | 0        | 1        | Unclassified | chr7:110303305-110306259  | 0.955   |
| Gm6377        | 0 | 0 | 0 | 1    | 0.016667 | 0.690919 | 1        | Unclassified | chrX:106390094-106395784  | 3.691   |
| Olfr584       | 0 | 0 | 0 | 1    | 0.016667 | 0        | 1        | Unclassified | chr7:110232033-110234993  | 0.961   |
| 1810029B16Rik | 0 | 0 | 0 | 315  | 5.25     | 7.59357  | 7.0974   | Unclassified | chr8:69000244-69012406    | 10.163  |
| Esrrb         | 0 | 0 | 0 | 193  | 3.216667 | 0.109317 | 0.910166 | Unclassified | chr12:87700066-87862577   | 160.512 |
| Spink2        | 0 | 0 | 0 | 14   | 0.233333 | 0.104709 | 2.165303 | Unclassified | chr5:77634132-77642478    | 6.347   |
| Cln3          | 0 | 0 | 0 | 165  | 2.75     | 4.07231  | 8.829036 | Unclassified | chr7:133714913-133728750  | 11.838  |
| Thap3         | 0 | 0 | 0 | 178  | 2.966667 | 12.4838  | 2.738175 | Elongating   | chr4:151356747-151365095  | 6.349   |
| Ifi202b       | 0 | 0 | 0 | 11   | 0.183333 | 0.017862 | 0        | Unclassified | chr1:175892699-175914975  | 20.277  |
| Ltf           | 0 | 0 | 0 | 35   | 0.583333 | 0.037393 | 0        | Unclassified | chr9:110919795-110945270  | 23.476  |
| Ddx1          | 0 | 0 | 0 | 581  | 9.683333 | 26.2093  | 13.94126 | Unclassified | chr12:13226112-13257980   | 29.869  |
| Magee1        | 0 | 0 | 0 | 71   | 1.183333 | 3.40406  | 5.980882 | Unclassified | chrX:102313734-102319250  | 3.517   |
| Aqp9          | 0 | 0 | 0 | 45   | 0.75     | 0.222977 | 0.539893 | Unclassified | chr9:70958467-71013096    | 52.63   |
| 1110002B05Rik | 0 | 0 | 0 | 361  | 6.016667 | 14.3664  | 21.95833 | Unclassified | chr12:55746360-55759559   | 11.2    |
| Il1r12        | 0 | 0 | 0 | 66   | 1.1      | 0.427211 | 3.781013 | Unclassified | chr1:40379471-40422316    | 40.846  |
| Tmem184c      | 0 | 0 | 0 | 237  | 3.95     | 8.81414  | 24.64386 | Stalled      | chr8:80119878-80136552    | 14.675  |
| 4930526D03Rik | 0 | 0 | 0 | 13   | 0.216667 | 0.0537   | 0.698    | Unclassified | chr2:181431499-181435147  | 1.649   |
| Kras          | 0 | 0 | 0 | 544  | 9.066667 | 4.72986  | 15.76292 | Unclassified | chr6:145165220-145200751  | 33.532  |
| Cdh19         | 0 | 0 | 0 | 22   | 0.366667 | 0        | 0        | Unclassified | chr1:112785771-112875949  | 88.179  |
| Spag11b       | 0 | 0 | 0 | 2    | 0.033333 | 0        | 0.556147 | Unclassified | chr8:19138758-19143010    | 2.253   |
| Ltk           | 0 | 0 | 0 | 67   | 1.116667 | 1.8631   | 0.342034 | Unclassified | chr2:119577061-119588167  | 9.107   |
| Olfr937       | 0 | 0 | 0 | 0    | 0        | 0.027385 | 0        | Unclassified | chr9:38867313-38870249    | 0.937   |
| 1700037H04Rik | 0 | 0 | 0 | 313  | 5.216667 | 15.6337  | 52.81522 | Stalled      | chr2:130972060-130987756  | 13.697  |
| 1700023A16Rik | 0 | 0 | 0 | 22   | 0.366667 | 0        | 1.007346 | Unclassified | chr6:146796631-146819926  | 21.296  |
| Ptov1         | 0 | 0 | 0 | 182  | 3.033333 | 7.74626  | 2.685274 | Elongating   | chr7:52118437-52127158    | 6.722   |
| Gpr87         | 0 | 0 | 0 | 2    | 0.033333 | 0        | 2        | Unclassified | chr3:58982844-58986007    | 1.164   |
| Folr4         | 0 | 0 | 0 | 55   | 0.916667 | 1.23272  | 4.883005 | Unclassified | chr9:14690257-14710395    | 18.139  |
| 1810033B17Rik | 0 | 0 | 0 | 29   | 0.483333 | 0.724283 | 1.236311 | Unclassified | chr8:3663761-3668905      | 3.145   |
| Olfr1272      | 0 | 0 | 0 | 0    | 0        | 0.014218 | 0        | Unclassified | chr2:90121803-90124730    | 0.928   |
| Pes1          | 0 | 0 | 0 | 752  | 12.53333 | 32.0788  | 4.733702 | Unclassified | chr11:3861977-3880007     | 16.031  |
| 1700042G07Rik | 0 | 0 | 0 | 3    | 0.05     | 0.065389 | 3        | Unclassified | chr4:115843976-115846902  | 0.927   |
| Erp27         | 0 | 0 | 0 | 284  | 4.733333 | 0.59173  | 7.830544 | Unclassified | chr6:136855907-136872701  | 14.795  |
| Dyrk2         | 0 | 0 | 0 | 482  | 8.033333 | 7.74124  | 6.544439 | Unclassified | chr10:118296404-118307959 | 9.556   |
| Hrct1         | 0 | 0 | 0 | 8    | 0.133333 | 0.042113 | 4        | Unclassified | chr4:43738069-43740982    | 0.914   |
| C1qtnf2       | 0 | 0 | 0 | 26   | 0.433333 | 0        | 1.271482 | Unclassified | chr11:43285845-43305027   | 17.183  |
| Zfp9          | 0 | 0 | 0 | 50   | 0.833333 | 0.325225 | 8.690865 | Unclassified | chr6:118411967-118431291  | 17.325  |
| Islr          | 0 | 0 | 0 | 11   | 0.183333 | 0.029903 | 0.422535 | Unclassified | chr9:58004075-58008949    | 2.875   |
| Rfxank        | 0 | 0 | 0 | 771  | 12.85    | 10.7282  | 0.997781 | Unclassified | chr8:72654704-72665096    | 8.393   |
| Iqcf4         | 0 | 0 | 0 | 3    | 0.05     | 0.035258 | 1        | Unclassified | chr9:106470649-106475298  | 2.65    |

|               |   |   |   |      |          |          |          |              |                           |         |
|---------------|---|---|---|------|----------|----------|----------|--------------|---------------------------|---------|
| Tnfsf13b      | 0 | 0 | 0 | 41   | 0.683333 | 0.203793 | 4.944917 | Unclassified | chr8:10004632-10035999    | 29.368  |
| Kcna2         | 0 | 0 | 0 | 11   | 0.183333 | 0.100128 | 2.091332 | Unclassified | chr3:106902484-106909797  | 5.314   |
| BC026585      | 0 | 0 | 0 | 116  | 1.933333 | 3.08145  | 15.96087 | Stalled      | chr1:159386712-159418864  | 30.153  |
| Spire1        | 0 | 0 | 0 | 106  | 1.766667 | 0.804398 | 0.376906 | Unclassified | chr18:67647862-67714375   | 64.514  |
| Zcchc13       | 0 | 0 | 0 | 1    | 0.016667 | 0.035634 | 0        | Unclassified | chrX:100823924-100827003  | 1.08    |
| Tpp1          | 0 | 0 | 0 | 68   | 1.133333 | 6.42192  | 2.065506 | Unclassified | chr7:112893360-112902721  | 7.362   |
| A930038C07Rik | 0 | 0 | 0 | 69   | 1.15     | 0.3912   | 10.93591 | Stalled      | chr6:65619604-65656924    | 35.321  |
| Fam171b       | 0 | 0 | 0 | 53   | 0.883333 | 0.547545 | 2.949962 | Unclassified | chr2:83650884-83721515    | 68.632  |
| Lemd3         | 0 | 0 | 0 | 765  | 12.75    | 7.31755  | 24.23665 | Unclassified | chr10:120360466-120418386 | 55.921  |
| Xirp1         | 0 | 0 | 0 | 18   | 0.3      | 0.030015 | 0.825036 | Unclassified | chr9:119923382-119930933  | 5.552   |
| Accs3         | 0 | 0 | 0 | 87   | 1.45     | 0.102338 | 0        | Unclassified | chr10:106373220-106562720 | 187.501 |
| Ces5          | 0 | 0 | 0 | 5    | 0.083333 | 0.050085 | 0        | Unclassified | chr8:107448159-107458572  | 8.414   |
| Tmprss12      | 0 | 0 | 0 | 5    | 0.083333 | 0.038002 | 0        | Unclassified | chr15:100109267-100123484 | 12.218  |
| Lin28b        | 0 | 0 | 0 | 46   | 0.766667 | 0.042742 | 0.672894 | Unclassified | chr10:45096438-45192007   | 93.57   |
| Cpne9         | 0 | 0 | 0 | 166  | 2.766667 | 0.096849 | 9.396198 | Unclassified | chr6:113230300-113255565  | 23.266  |
| Slc44a4       | 0 | 0 | 0 | 108  | 1.8      | 0.068323 | 14.32883 | Stalled      | chr17:35049424-35067301   | 15.878  |
| Dpf3          | 0 | 0 | 0 | 210  | 3.5      | 0.039496 | 9.142819 | Unclassified | chr12:84370184-84830658   | 458.475 |
| Fut10         | 0 | 0 | 0 | 76   | 1.266667 | 0.471096 | 1.522403 | Unclassified | chr8:32295803-32371955    | 74.153  |
| Glp1r         | 0 | 0 | 0 | 56   | 0.933333 | 0.129895 | 1.206707 | Unclassified | chr17:31036811-31073455   | 34.645  |
| Gira1         | 0 | 0 | 0 | 103  | 1.716667 | 0.027327 | 1.444855 | Unclassified | chr11:55328314-55423292   | 92.979  |
| Gira4         | 0 | 0 | 0 | 30   | 0.5      | 0.02725  | 1.789539 | Unclassified | chrX:133292212-133316260  | 22.049  |
| Glrp1         | 0 | 0 | 0 | 21   | 0.35     | 0.193763 | 3.471057 | Unclassified | chr1:90396445-90408641    | 10.197  |
| Glrb          | 0 | 0 | 0 | 43   | 0.716667 | 0.030025 | 0.627347 | Unclassified | chr3:80647525-80719546    | 70.022  |
| Csl           | 0 | 0 | 0 | 2    | 0.033333 | 12.6975  | 0.488491 | Unclassified | chr10:99220338-99224292   | 1.955   |
| Dcaf7         | 0 | 0 | 0 | 593  | 9.883333 | 22.2967  | 9.314446 | Unclassified | chr11:105896185-105920637 | 22.453  |
| Ggt6          | 0 | 0 | 0 | 10   | 0.166667 | 0.070342 | 1.093023 | Unclassified | chr11:72247027-72251906   | 2.88    |
| 1700003E16Rik | 0 | 0 | 0 | 31   | 0.516667 | 1.9254   | 5.074148 | Unclassified | chr6:83104397-83112969    | 6.573   |
| Bcl11b        | 0 | 0 | 0 | 125  | 2.083333 | 0.075165 | 0        | Unclassified | chr12:109148612-109243624 | 93.013  |
| Arglu1        | 0 | 0 | 0 | 877  | 14.61667 | 56.3376  | 9.153949 | Unclassified | chr8:8666575-8692537      | 23.963  |
| Ercc6l        | 0 | 0 | 0 | 202  | 3.366667 | 3.26294  | 19.60514 | Stalled      | chrX:99338158-99354430    | 14.273  |
| Ppp1r1a       | 0 | 0 | 0 | 62   | 1.033333 | 0.079174 | 0.774191 | Unclassified | chr15:103360709-103370423 | 7.715   |
| Slc43a3       | 0 | 0 | 0 | 1342 | 22.36667 | 22.3542  | 4.292572 | Unclassified | chr2:84774812-84798666    | 21.855  |
| Pdcd1lg2      | 0 | 0 | 0 | 708  | 11.8     | 2.52241  | 0.240822 | Unclassified | chr19:29483408-29547416   | 62.009  |
| Pdgrfa        | 0 | 0 | 0 | 66   | 1.1      | 0.079926 | 0        | Unclassified | chr5:75546315-75594229    | 45.915  |
| 2610524H06Rik | 0 | 0 | 0 | 112  | 1.866667 | 5.813    | 9.247786 | Unclassified | chr5:115271945-115275477  | 1.533   |
| Wdr47         | 0 | 0 | 0 | 162  | 2.7      | 1.74472  | 31.37804 | Stalled      | chr3:108392195-108448637  | 54.443  |
| Akr1c19       | 0 | 0 | 0 | 5    | 0.083333 | 0.030982 | 0.772998 | Unclassified | chr13:4230985-4247605     | 14.621  |
| Pnpla1        | 0 | 0 | 0 | 83   | 1.383333 | 0.062816 | 0        | Unclassified | chr17:28993355-29027253   | 31.899  |
| Rabep1        | 0 | 0 | 0 | 880  | 14.66667 | 3.39759  | 24.32466 | Unclassified | chr11:70656264-70756606   | 98.343  |
| Olfr358       | 0 | 0 | 0 | 1    | 0.016667 | 0        | 1        | Unclassified | chr2:36860139-36863132    | 0.994   |
| Pim2          | 0 | 0 | 0 | 364  | 6.066667 | 15.99    | 14.00164 | Unclassified | chrX:7453431-7460558      | 5.128   |
| Pip           | 0 | 0 | 0 | 1    | 0.016667 | 0        | 0        | Unclassified | chr6:41795547-41802061    | 4.515   |
| Pik3r3        | 0 | 0 | 0 | 332  | 5.533333 | 1.09876  | 72.67135 | Stalled      | chr4:115892518-115975661  | 81.144  |
| Pikfyve       | 0 | 0 | 0 | 611  | 10.18333 | 2.04989  | 38.38923 | Stalled      | chr1:65231258-65325270    | 92.013  |
| Cul2          | 0 | 0 | 0 | 519  | 8.65     | 4.6579   | 17.76829 | Unclassified | chr18:3381222-3436698     | 53.477  |
| Pggt1b        | 0 | 0 | 0 | 710  | 11.83333 | 7.2974   | 20.40251 | Unclassified | chr18:46399602-46442504   | 40.903  |
| Scn1a         | 0 | 0 | 0 | 75   | 1.25     | 0.01755  | 1.396836 | Unclassified | chr2:66108838-66280894    | 170.057 |
| Scn10a        | 0 | 0 | 0 | 118  | 1.966667 | 0.028898 | 0        | Unclassified | chr9:119517583-119605478  | 85.896  |
| Prol1         | 0 | 0 | 0 | 5    | 0.083333 | 0.200397 | 1.555786 | Unclassified | chr5:88744336-88757842    | 11.507  |
| Muc5ac        | 0 | 0 | 0 | 40   | 0.666667 | 0.015775 | 0.4339   | Unclassified | chr7:148972915-149005040  | 30.126  |
| Opn4          | 0 | 0 | 0 | 19   | 0.316667 | 0.073597 | 0.334012 | Unclassified | chr14:35403803-35415328   | 9.526   |
| Mug1          | 0 | 0 | 0 | 19   | 0.316667 | 0.012455 | 0        | Unclassified | chr6:121786558-121839074  | 50.517  |
| Cpamd8        | 0 | 0 | 0 | 19   | 0.316667 | 0.008288 | 0        | Unclassified | chr6:121954815-122035985  | 79.171  |
| Rpl14         | 0 | 0 | 0 | 706  | 11.76667 | 366.355  | 5.926659 | Unclassified | chr9:120478633-120483770  | 3.138   |
| Dynl1c3       | 0 | 0 | 0 | 93   | 1.55     | 7.42245  | 12.18766 | Stalled      | chrX:9231395-9242109      | 8.715   |
| Cd84          | 0 | 0 | 0 | 319  | 5.316667 | 3.49204  | 4.60037  | Unclassified | chr1:173768709-173820849  | 50.141  |
| Fgf22         | 0 | 0 | 0 | 90   | 1.5      | 0.131046 | 0.484084 | Unclassified | chr10:79215863-79219706   | 1.844   |
| Ccdc159       | 0 | 0 | 0 | 57   | 0.95     | 0.995212 | 14.15071 | Stalled      | chr9:21729914-21740316    | 8.403   |
| Fam135a       | 0 | 0 | 0 | 100  | 1.666667 | 0.293307 | 16.25573 | Stalled      | chr1:24017596-24109180    | 89.585  |
| Dppa1         | 0 | 0 | 0 | 24   | 0.4      | 0.016983 | 0        | Unclassified | chr11:46420511-46444776   | 22.266  |
| Lrrc20        | 0 | 0 | 0 | 450  | 7.5      | 2.16191  | 42.49912 | Stalled      | chr10:60936580-61044976   | 106.397 |
| Parp12        | 0 | 0 | 0 | 111  | 1.85     | 1.65469  | 6.080615 | Unclassified | chr6:39036410-39070348    | 31.939  |
| Grik4         | 0 | 0 | 0 | 518  | 8.633333 | 0.088797 | 2.725879 | Unclassified | chr9:42328518-42754454    | 423.937 |
| Tpk1          | 0 | 0 | 0 | 619  | 10.31667 | 0.980206 | 77.78066 | Stalled      | chr6:43295005-43618174    | 321.17  |
| Grxcr1        | 0 | 0 | 0 | 57   | 0.95     | 0.047956 | 0.715914 | Unclassified | chr5:68421073-68557635    | 134.563 |
| 1110057K04Rik | 0 | 0 | 0 | 686  | 11.43333 | 5.07723  | 34.48733 | Unclassified | chr12:8212912-8292564     | 77.653  |
| Pdcl3         | 0 | 0 | 0 | 149  | 2.483333 | 15.9802  | 18.58347 | Stalled      | chr1:39042658-39054081    | 9.424   |
| Armc8         | 0 | 0 | 0 | 822  | 13.7     | 5.22136  | 24.94587 | Unclassified | chr9:99378810-99471318    | 90.509  |
| Cox4i1        | 0 | 0 | 0 | 815  | 13.58333 | 378.71   | 6.079423 | Unclassified | chr8:123190189-123198109  | 5.921   |
| AF529169      | 0 | 0 | 0 | 34   | 0.566667 | 0.075479 | 0.49964  | Unclassified | chr9:89484871-89519824    | 32.954  |
| Zfp560        | 0 | 0 | 0 | 198  | 3.3      | 0.72857  | 33.66742 | Stalled      | chr9:20149579-20191602    | 40.024  |
| Ankrd46       | 0 | 0 | 0 | 244  | 4.066667 | 6.25482  | 13.45992 | Unclassified | chr15:36407422-36428546   | 19.125  |
| Ngly1         | 0 | 0 | 0 | 577  | 9.616667 | 4.79256  | 46.48259 | Stalled      | chr14:17079827-17144440   | 62.614  |
| Gm1574        | 0 | 0 | 0 | 13   | 0.216667 | 0.09403  | 0        | Unclassified | chr13:46367089-46395484   | 26.396  |
| Maea          | 0 | 0 | 0 | 906  | 15.1     | 36.9733  | 25.6089  | Unclassified | chr5:33676220-33715943    | 37.724  |
| Wdr8          | 0 | 0 | 0 | 232  | 3.866667 | 8.89058  | 4.695114 | Unclassified | chr4:153514480-153530927  | 14.448  |
| Gm904         | 0 | 0 | 0 | 0    | 0        | 0        | 0        | Unclassified | chr13:50736596-50741207   | 2.612   |
| Vwc2l         | 0 | 0 | 0 | 85   | 1.416667 | 0.022026 | 0.653871 | Unclassified | chr1:70770288-70931971    | 159.684 |
| Fam20c        | 0 | 0 | 0 | 224  | 3.733333 | 0.700274 | 21.24146 | Stalled      | chr5:139229034-139286017  | 54.984  |
| Sh3rf1        | 0 | 0 | 0 | 560  | 9.333333 | 0.757397 | 16.36547 | Stalled      | chr8:63700967-63874869    | 171.903 |
| Cep290        | 0 | 0 | 0 | 163  | 2.716667 | 0.261807 | 0.910276 | Unclassified | chr10:99948922-100036289  | 85.368  |
| Gai3st2       | 0 | 0 | 0 | 5    | 0.083333 | 0.021824 | 2.802006 | Unclassified | chr1:95755920-95773071    | 15.152  |
| Hook1         | 0 | 0 | 0 | 197  | 3.283333 | 5.16688  | 52.88269 | Stalled      | chr4:95632069-95690965    | 56.897  |
| 4930458L03Rik | 0 | 0 | 0 | 4    | 0.066667 | 0.012164 | 0.705493 | Unclassified | chr13:65016713-65024503   | 5.791   |
| Olfr531       | 0 | 0 | 0 | 3    | 0.05     | 0.070035 | 3        | Unclassified | chr7:147586028-147588943  | 0.916   |
| Olfr522       | 0 | 0 | 0 | 3    | 0.05     | 0.027298 | 3        | Unclassified | chr7:147347908-147350847  | 0.94    |

|                      |   |   |   |      |          |          |          |              |                           |          |
|----------------------|---|---|---|------|----------|----------|----------|--------------|---------------------------|----------|
| <b>Olfr341</b>       | 0 | 0 | 0 | 0    | 0        | 0.008395 | 0        | Unclassified | chr2:36334706-36337648    | 0.943    |
| <b>Olfr342</b>       | 0 | 0 | 0 | 2    | 0.033333 | 0.057403 | 1        | Unclassified | chr2:36380933-36383872    | 0.94     |
| <b>Lonrf2</b>        | 0 | 0 | 0 | 30   | 0.5      | 0.116122 | 0        | Unclassified | chr1:38851353-38880060    | 26.708   |
| <b>Olfr170</b>       | 0 | 0 | 0 | 0    | 0        | 0.062817 | 0        | Unclassified | chr16:19605817-19608759   | 0.943    |
| <b>Olfr525</b>       | 0 | 0 | 0 | 7    | 0.116667 | 0.020622 | 2        | Unclassified | chr7:147506599-147509529  | 0.931    |
| <b>Abat</b>          | 0 | 0 | 0 | 139  | 2.316667 | 0.06163  | 5.514571 | Unclassified | chr16:8511521-8621658     | 108.138  |
| <b>Plekhg6</b>       | 0 | 0 | 0 | 40   | 0.666667 | 0.021226 | 0.301763 | Unclassified | chr6:125312668-125332522  | 17.855   |
| <b>Il17d</b>         | 0 | 0 | 0 | 40   | 0.666667 | 1.18514  | 0.732546 | Unclassified | chr14:58141665-58162003   | 18.339   |
| <b>6530401D17Rik</b> | 0 | 0 | 0 | 30   | 0.5      | 1.75372  | 0.597771 | Unclassified | chrX:132526358-132569483  | 41.126   |
| <b>Ccdc65</b>        | 0 | 0 | 0 | 43   | 0.716667 | 1.01739  | 1.104172 | Unclassified | chr15:98536657-98553764   | 15.108   |
| <b>Bdh2</b>          | 0 | 0 | 0 | 39   | 0.65     | 0.074876 | 1.731495 | Unclassified | chr3:134942255-134967389  | 23.135   |
| <b>Mmp13</b>         | 0 | 0 | 0 | 13   | 0.216667 | 0.024255 | 1.48393  | Unclassified | chr9:7270544-7283331      | 10.788   |
| <b>Fam118b</b>       | 0 | 0 | 0 | 814  | 13.56667 | 7.17906  | 36.53785 | Unclassified | chr9:35024549-35077352    | 50.804   |
| <b>Col2a1</b>        | 0 | 0 | 0 | 62   | 1.033333 | 0.069912 | 2.132653 | Unclassified | chr15:97806032-97837155   | 29.124   |
| <b>Col3a1</b>        | 0 | 0 | 0 | 13   | 0.216667 | 0.020735 | 0.755944 | Unclassified | chr1:45366382-45406550    | 38.169   |
| <b>Col4a1</b>        | 0 | 0 | 0 | 189  | 3.15     | 0.081374 | 1.159541 | Unclassified | chr8:11198422-11314826    | 114.405  |
| <b>Col17a1</b>       | 0 | 0 | 0 | 153  | 2.55     | 0.04237  | 0        | Unclassified | chr19:47720830-47768532   | 45.703   |
| <b>Col18a1</b>       | 0 | 0 | 0 | 283  | 4.716667 | 0.081976 | 0.868932 | Unclassified | chr10:76514923-76631275   | 114.353  |
| <b>Cd151</b>         | 0 | 0 | 0 | 246  | 4.1      | 6.23203  | 0.519858 | Unclassified | chr7:148651260-148657380  | 4.121    |
| <b>Olfr1290</b>      | 0 | 0 | 0 | 0    | 0        | 0.020457 | 0        | Unclassified | chr2:111329374-111332313  | 0.94     |
| <b>Olfr773</b>       | 0 | 0 | 0 | 0    | 0        | 0.102833 | 0        | Unclassified | chr10:128623541-128626475 | 0.935    |
| <b>Rnf19a</b>        | 0 | 0 | 0 | 501  | 8.35     | 4.34567  | 44.68967 | Stalled      | chr15:36169688-36214902   | 43.215   |
| <b>Olfr772</b>       | 0 | 0 | 0 | 0    | 0        | 0.031869 | 0        | Unclassified | chr10:128611107-128614110 | 1.004    |
| <b>Olfr769</b>       | 0 | 0 | 0 | 1    | 0.016667 | 0        | 0        | Unclassified | chr10:128548540-128551479 | 0.94     |
| <b>Lrrtm2</b>        | 0 | 0 | 0 | 22   | 0.366667 | 0        | 1.002548 | Unclassified | chr18:35368662-35376678   | 6.017    |
| <b>Fam186b</b>       | 0 | 0 | 0 | 29   | 0.483333 | 0.040214 | 0        | Unclassified | chr15:99101448-99119611   | 16.164   |
| <b>Olfr137</b>       | 0 | 0 | 0 | 1    | 0.016667 | 0        | 0        | Unclassified | chr17:38441465-38444404   | 0.94     |
| <b>Olfr130</b>       | 0 | 0 | 0 | 1    | 0.016667 | 0        | 1        | Unclassified | chr17:38202117-38205071   | 0.955    |
| <b>Dzip1</b>         | 0 | 0 | 0 | 111  | 1.85     | 0.62405  | 1.579726 | Unclassified | chr14:119274741-119324389 | 47.649   |
| <b>Olfr266</b>       | 0 | 0 | 0 | 1    | 0.016667 | 0        | 0        | Unclassified | chr3:106624524-106627475  | 0.952    |
| <b>Olfr724</b>       | 0 | 0 | 0 | 0    | 0        | 0.013748 | 0        | Unclassified | chr14:50579765-50582771   | 1.007    |
| <b>Olfr1410</b>      | 0 | 0 | 0 | 3    | 0.05     | 0.03305  | 1        | Unclassified | chr1:94502415-94505384    | 0.97     |
| <b>Olfr722</b>       | 0 | 0 | 0 | 5    | 0.083333 | 0        | 1.539436 | Unclassified | chr14:50513932-50523616   | 7.685    |
| <b>Olfr730</b>       | 0 | 0 | 0 | 0    | 0        | 0        | 0        | Unclassified | chr14:50805936-50808893   | 0.958    |
| <b>Olfr486</b>       | 0 | 0 | 0 | 0    | 0        | 0.027092 | 0        | Unclassified | chr7:115315311-115318256  | 0.946    |
| <b>Gpr107</b>        | 0 | 0 | 0 | 1035 | 17.25    | 8.71488  | 6.798274 | Unclassified | chr2:31005835-31072087    | 64.253   |
| <b>Lcmt1</b>         | 0 | 0 | 0 | 281  | 4.683333 | 14.6393  | 16.14645 | Stalled      | chr7:130519495-130573872  | 52.378   |
| <b>Nmnat2</b>        | 0 | 0 | 0 | 191  | 3.183333 | 0.104843 | 0        | Unclassified | chr1:154800230-154966391  | 164.162  |
| <b>Rtn4r</b>         | 0 | 0 | 0 | 60   | 1        | 0.054712 | 1.269223 | Unclassified | chr16:18125798-18152501   | 24.704   |
| <b>Plin1</b>         | 0 | 0 | 0 | 29   | 0.483333 | 0.275428 | 0.564364 | Unclassified | chr7:86866049-86879662    | 11.614   |
| <b>Dnm3</b>          | 0 | 0 | 0 | 568  | 9.466667 | 0.489966 | 1.396933 | Unclassified | chr1:163917432-164410165  | 490.734  |
| <b>Ube2cbp</b>       | 0 | 0 | 0 | 369  | 6.15     | 3.04945  | 42.8345  | Stalled      | chr9:86200840-86360523    | 157.684  |
| <b>Try5</b>          | 0 | 0 | 0 | 0    | 0        | 0.080002 | 0        | Unclassified | chr6:41261230-41266709    | 3.48     |
| <b>Rpn1</b>          | 0 | 0 | 0 | 799  | 13.31667 | 63.886   | 7.560938 | Unclassified | chr6:88032466-88055298    | 20.833   |
| <b>Mmp10</b>         | 0 | 0 | 0 | 10   | 0.166667 | 0.104684 | 1.602701 | Unclassified | chr9:7500359-7510240      | 7.882    |
| <b>Wfdc3</b>         | 0 | 0 | 0 | 20   | 0.333333 | 0.046889 | 0.787576 | Unclassified | chr2:164556725-164570767  | 12.043   |
| <b>Zfp11</b>         | 0 | 0 | 0 | 206  | 3.433333 | 0.366456 | 28.79475 | Stalled      | chr5:130160469-130177963  | 15.495   |
| <b>Zfp101</b>        | 0 | 0 | 0 | 200  | 3.333333 | 3.32825  | 14.06229 | Stalled      | chr17:33517123-33533582   | 14.46    |
| <b>Tspyl2</b>        | 0 | 0 | 0 | 296  | 4.933333 | 12.2344  | 8.526261 | Unclassified | chrX:148771394-148779027  | 5.634    |
| <b>Zfp105</b>        | 0 | 0 | 0 | 9    | 0.15     | 0.140698 | 0.49828  | Unclassified | chr9:122830195-122840146  | 7.952    |
| <b>Rnf103</b>        | 0 | 0 | 0 | 347  | 5.783333 | 5.72014  | 41.75416 | Stalled      | chr6:71441887-71460875    | 16.989   |
| <b>Khdrbs3</b>       | 0 | 0 | 0 | 159  | 2.65     | 0.480697 | 1.547627 | Unclassified | chr15:68756849-68923948   | 165.1    |
| <b>Hunk</b>          | 0 | 0 | 0 | 146  | 2.433333 | 0.097229 | 2.223963 | Unclassified | chr16:90384641-90499798   | 113.158  |
| <b>Arhgap20</b>      | 0 | 0 | 0 | 66   | 1.1      | 0.090625 | 3.5705   | Unclassified | chr9:51571456-51661164    | 87.709   |
| <b>Rab3d</b>         | 0 | 0 | 0 | 75   | 1.25     | 2.10166  | 8.978188 | Unclassified | chr9:21711954-21724565    | 10.612   |
| <b>C1qtnf9</b>       | 0 | 0 | 0 | 23   | 0.383333 | 0.013477 | 0        | Unclassified | chr14:61384970-61399705   | 12.736   |
| <b>Fgd6</b>          | 0 | 0 | 0 | 423  | 7.05     | 0.933616 | 33.96498 | Stalled      | chr10:93496745-93608084   | 109.34   |
| <b>Fam162b</b>       | 0 | 0 | 0 | 5    | 0.083333 | 0.069403 | 0        | Unclassified | chr10:51305256-51312266   | 5.011    |
| <b>Homer1</b>        | 0 | 0 | 0 | 468  | 7.8      | 3.71282  | 32.40498 | Stalled      | chr13:94072449-94174917   | 100.469  |
| <b>Dfna5</b>         | 0 | 0 | 0 | 178  | 2.966667 | 0.078112 | 2.946229 | Unclassified | chr6:50157401-50213768    | 54.368   |
| <b>Cul3</b>          | 0 | 0 | 0 | 916  | 15.26667 | 13.0605  | 24.84169 | Unclassified | chr1:80263392-80339005    | 73.614   |
| <b>Panx3</b>         | 0 | 0 | 0 | 10   | 0.166667 | 0.035629 | 1.086281 | Unclassified | chr9:37467486-37478807    | 9.322    |
| <b>Sirpa</b>         | 0 | 0 | 0 | 162  | 2.7      | 1.6083   | 3.271205 | Unclassified | chr2:129417313-129457964  | 38.652   |
| <b>Atg10</b>         | 0 | 0 | 0 | 858  | 14.3     | 1.13087  | 108.0004 | Stalled      | chr13:91074953-91365592   | 288.64   |
| <b>Cntnap2</b>       | 0 | 0 | 0 | 933  | 15.55    | 0.026574 | 0.706431 | Unclassified | chr6:45008059-47251370    | 2241.312 |
| <b>Grtp1</b>         | 0 | 0 | 0 | 174  | 2.9      | 1.07591  | 1.273069 | Unclassified | chr8:13176868-13202624    | 23.757   |
| <b>Efcab1</b>        | 0 | 0 | 0 | 9    | 0.15     | 0        | 0.678431 | Unclassified | chr16:14904738-14924615   | 17.878   |
| <b>Wdr61</b>         | 0 | 0 | 0 | 398  | 6.633333 | 28.163   | 12.25535 | Unclassified | chr9:54564961-54584301    | 17.341   |
| <b>Nr2c1</b>         | 0 | 0 | 0 | 253  | 4.216667 | 1.28589  | 18.96801 | Stalled      | chr10:93608675-93659959   | 49.285   |
| <b>Crisp2</b>        | 0 | 0 | 0 | 10   | 0.166667 | 0.045513 | 0.759055 | Unclassified | chr17:40901685-40933037   | 29.353   |
| <b>Spinlw1</b>       | 0 | 0 | 0 | 6    | 0.1      | 0.033951 | 1.027947 | Unclassified | chr2:164413842-164421071  | 5.23     |
| <b>Gnptg</b>         | 0 | 0 | 0 | 207  | 3.45     | 11.6241  | 8.107123 | Unclassified | chr17:25371261-25379061   | 5.801    |
| <b>1700018L24Rik</b> | 0 | 0 | 0 | 35   | 0.583333 | 0        | 0.321911 | Unclassified | chr8:11838520-11855761    | 15.242   |
| <b>Klhl23</b>        | 0 | 0 | 0 | 25   | 0.416667 | 0.48018  | 3.152124 | Unclassified | chr2:69658426-69674707    | 14.282   |
| <b>1700109H08Rik</b> | 0 | 0 | 0 | 356  | 5.933333 | 0        | 1.071195 | Elongating   | chr5:3569715-3584341      | 12.627   |
| <b>Mrap</b>          | 0 | 0 | 0 | 56   | 0.933333 | 0        | 0.691699 | Unclassified | chr16:90736568-90750021   | 11.454   |
| <b>2510039O18Rik</b> | 0 | 0 | 0 | 325  | 5.416667 | 34.0984  | 4.644079 | Unclassified | chr4:147313003-147321423  | 6.421    |
| <b>V1rg9</b>         | 0 | 0 | 0 | 0    | 0        | 0        | 0        | Unclassified | chr7:12845107-12848028    | 0.922    |
| <b>Camk2n2</b>       | 0 | 0 | 0 | 157  | 2.616667 | 1.8192   | 1.565091 | Elongating   | chr16:20619287-20623351   | 2.065    |
| <b>Glrx5</b>         | 0 | 0 | 0 | 383  | 6.383333 | 75.0674  | 15.01691 | Unclassified | chr12:106268898-106279120 | 8.223    |
| <b>V1rg7</b>         | 0 | 0 | 0 | 0    | 0        | 0        | 0        | Unclassified | chr7:12735812-12738753    | 0.942    |
| <b>Prpf8</b>         | 0 | 0 | 0 | 983  | 16.38333 | 46.9789  | 4.158277 | Unclassified | chr11:75298278-75322949   | 22.672   |
| <b>Olfr1418</b>      | 0 | 0 | 0 | 5    | 0.083333 | 0.167259 | 3        | Unclassified | chr19:11929484-11932441   | 0.958    |
| <b>Olfr1148</b>      | 0 | 0 | 0 | 0    | 0        | 0.020327 | 0        | Unclassified | chr2:87671197-87674142    | 0.946    |
| <b>Olfr310</b>       | 0 | 0 | 0 | 0    | 0        | 0        | 0        | Unclassified | chr7:93417239-93420321    | 1.083    |
| <b>Ehf</b>           | 0 | 0 | 0 | 47   | 0.783333 | 0.1636   | 0.462783 | Unclassified | chr2:103103589-103145353  | 39.765   |



|                      |   |          |   |      |          |          |          |              |                           |          |
|----------------------|---|----------|---|------|----------|----------|----------|--------------|---------------------------|----------|
| <b>Ei24</b>          | 0 | 0        | 0 | 123  | 2.05     | 15.2155  | 24.94872 | Stalled      | chr9:36586740-36606653    | 17.914   |
| <b>Socs7</b>         | 0 | 0        | 0 | 481  | 8.016667 | 5.54029  | 15.12076 | Unclassified | chr11:97221864-97259856   | 35.993   |
| <b>Ribp1</b>         | 0 | 0        | 0 | 13   | 0.216667 | 0.048001 | 0.426277 | Unclassified | chr7:86519756-86531671    | 9.916    |
| <b>Igfbp6</b>        | 0 | 0        | 0 | 9    | 0.15     | 0.1392   | 0.764124 | Unclassified | chr15:101972616-101979943 | 5.328    |
| <b>Stard6</b>        | 0 | 0        | 0 | 256  | 4.266667 | 0.196078 | 55.69365 | Stalled      | chr18:70630198-70660717   | 28.52    |
| <b>C80913</b>        | 0 | 0        | 0 | 724  | 12.06667 | 7.84095  | 20.91616 | Unclassified | chr7:38745011-38806571    | 59.561   |
| <b>GpnmB</b>         | 0 | 0        | 0 | 46   | 0.766667 | 1.07271  | 0.32978  | Unclassified | chr6:48984516-49008181    | 21.666   |
| <b>Narg2</b>         | 0 | 0        | 0 | 415  | 6.916667 | 2.44594  | 46.43246 | Stalled      | chr9:69243804-69280881    | 35.078   |
| <b>Gpr45</b>         | 0 | 0        | 0 | 62   | 1.033333 | 0.258891 | 2.371845 | Unclassified | chr1:43007716-43092294    | 82.579   |
| <b>Plk5</b>          | 0 | 0        | 0 | 27   | 0.45     | 0.121367 | 0.802344 | Unclassified | chr10:79817203-79828234   | 9.032    |
| <b>Gm7337</b>        | 0 | 0        | 0 | 5    | 0.083333 | 0.056522 | 0        | Unclassified | chr5:88277383-88282037    | 2.655    |
| <b>Insm2</b>         | 0 | 0        | 0 | 74   | 1.233333 | 0.56989  | 0.31082  | Unclassified | chr12:56697903-56703004   | 3.102    |
| <b>OlfR749</b>       | 0 | 0        | 0 | 2    | 0.033333 | 0        | 0        | Unclassified | chr14:51355895-51365999   | 8.105    |
| <b>Prkd3</b>         | 0 | 0        | 0 | 430  | 7.166667 | 6.12536  | 13.79235 | Stalled      | chr17:79348745-79422156   | 71.412   |
| <b>Fgfr10p</b>       | 0 | 0        | 0 | 459  | 7.65     | 7.00881  | 2.000339 | Elongating   | chr17:8356400-8389333     | 30.934   |
| <b>Adam28</b>        | 0 | 0        | 0 | 31   | 0.516667 | 0.082879 | 0        | Unclassified | chr14:69224083-69275899   | 49.817   |
| <b>CrB3</b>          | 0 | 0        | 0 | 50   | 0.833333 | 0.554339 | 0.389626 | Unclassified | chr17:57199699-57205337   | 3.639    |
| <b>Sic26a2</b>       | 0 | 114.7574 | 0 | 411  | 6.85     | 2.53427  | 30.36294 | Unclassified | chr18:61356507-61373250   | 14.744   |
| <b>Adam24</b>        | 0 | 0        | 0 | 4    | 0.066667 | 0        | 0        | Unclassified | chr8:41758447-41767553    | 7.107    |
| <b>Dtna</b>          | 0 | 0        | 0 | 167  | 2.783333 | 0.089647 | 0        | Unclassified | chr18:23571915-23818215   | 244.301  |
| <b>OlfR898</b>       | 0 | 0        | 0 | 1    | 0.016667 | 0.026982 | 0        | Unclassified | chr9:38154669-38157619    | 0.951    |
| <b>Tm6sf2</b>        | 0 | 0        | 0 | 96   | 1.6      | 0.424801 | 10.42562 | Stalled      | chr8:72594830-72603951    | 7.122    |
| <b>Pri8a2</b>        | 0 | 0        | 0 | 3    | 0.05     | 0.028137 | 0        | Unclassified | chr13:27435557-27446073   | 8.517    |
| <b>Fmo2</b>          | 0 | 0        | 0 | 26   | 0.433333 | 0.026893 | 0        | Unclassified | chr1:164805177-164830843  | 23.667   |
| <b>Hhla1</b>         | 0 | 0        | 0 | 24   | 0.4      | 0.050993 | 0        | Unclassified | chr15:65754004-65810366   | 54.363   |
| <b>Sic25a5</b>       | 0 | 0        | 0 | 514  | 8.566667 | 130.45   | 5.74724  | Unclassified | chrX:34333646-34338801    | 3.156    |
| <b>Anxa11</b>        | 0 | 0        | 0 | 481  | 8.016667 | 10.8157  | 13.54741 | Unclassified | chr14:26659640-26706290   | 44.651   |
| <b>Anxa3</b>         | 0 | 0        | 0 | 63   | 1.05     | 0.216682 | 0.454153 | Unclassified | chr5:97220403-97274987    | 52.585   |
| <b>Anxa4</b>         | 0 | 0        | 0 | 246  | 4.1      | 3.83878  | 15.84067 | Stalled      | chr6:86686833-86745578    | 56.746   |
| <b>4925202D21Rik</b> | 0 | 0        | 0 | 16   | 0.266667 | 0.090025 | 0.835969 | Unclassified | chr6:129272182-129283799  | 9.618    |
| <b>Qsox1</b>         | 0 | 0        | 0 | 366  | 6.1      | 8.55549  | 23.39958 | Unclassified | chr1:157625284-157662029  | 34.746   |
| <b>Git6d1</b>        | 0 | 0        | 0 | 18   | 0.3      | 0.035242 | 0        | Unclassified | chr2:25649486-25673356    | 21.871   |
| <b>Rtn1</b>          | 0 | 0        | 0 | 296  | 4.933333 | 0.415783 | 1.210572 | Unclassified | chr12:73312738-73511926   | 197.189  |
| <b>Erc1</b>          | 0 | 0        | 0 | 588  | 9.8      | 1.55631  | 24.53831 | Stalled      | chr6:119520813-11980168   | 277.356  |
| <b>Ctsq</b>          | 0 | 0        | 0 | 1    | 0.016667 | 0        | 0        | Unclassified | chr13:61136402-61143958   | 5.557    |
| <b>Ube4a</b>         | 0 | 0        | 0 | 671  | 11.18333 | 6.68969  | 18.50975 | Unclassified | chr9:44731209-44775683    | 42.475   |
| <b>Wnt8a</b>         | 0 | 0        | 0 | 15   | 0.25     | 0.143435 | 0        | Unclassified | chr18:34699981-34707715   | 5.735    |
| <b>Serpinb9d</b>     | 0 | 0        | 0 | 13   | 0.216667 | 0.043941 | 1.001149 | Unclassified | chr13:33282827-33295849   | 11.023   |
| <b>Ucma</b>          | 0 | 0        | 0 | 23   | 0.383333 | 0.081633 | 0.281703 | Unclassified | chr2:4895167-4906794      | 9.628    |
| <b>Serpinb5</b>      | 0 | 0        | 0 | 21   | 0.35     | 0.019987 | 0        | Unclassified | chr1:108755756-108779925  | 22.17    |
| <b>Lck</b>           | 0 | 0        | 0 | 188  | 3.133333 | 13.2864  | 1.62505  | Elongating   | chr4:129225587-129237616  | 10.03    |
| <b>Stra8</b>         | 0 | 0        | 0 | 50   | 0.833333 | 0.044042 | 0.531751 | Unclassified | chr6:34868959-34889342    | 18.384   |
| <b>Spic</b>          | 0 | 0        | 0 | 7    | 0.116667 | 0.131709 | 0        | Unclassified | chr10:88138014-88147768   | 7.755    |
| <b>Spin1</b>         | 0 | 0        | 0 | 634  | 10.56667 | 10.8037  | 11.64478 | Unclassified | chr13:51194266-51247915   | 51.65    |
| <b>Kcnu1</b>         | 0 | 0        | 0 | 77   | 1.283333 | 0.018148 | 0        | Unclassified | chr8:26958094-27048406    | 88.313   |
| <b>Tcf15</b>         | 0 | 0        | 0 | 12   | 0.2      | 0.275324 | 0        | Unclassified | chr2:151967344-151974832  | 5.489    |
| <b>Nudt10</b>        | 0 | 0        | 0 | 0    | 0        | 0.173705 | 0        | Unclassified | chrX:5745814-5752109      | 4.296    |
| <b>Zfp512</b>        | 0 | 0        | 0 | 249  | 4.15     | 6.20292  | 15.52136 | Stalled      | chr5:31752808-31784124    | 29.317   |
| <b>Tatdn2</b>        | 0 | 0        | 0 | 808  | 13.46667 | 23.1004  | 8.993076 | Unclassified | chr6:113645492-113661062  | 13.571   |
| <b>Cntn5</b>         | 0 | 0        | 0 | 501  | 8.35     | 0.014217 | 1.427042 | Unclassified | chr9:9660890-10906726     | 1243.837 |
| <b>Gm12942</b>       | 0 | 0        | 0 | 165  | 2.75     | 3.13352  | 12.81159 | Stalled      | chr4:126801289-126806888  | 3.6      |
| <b>Rbm26</b>         | 0 | 0        | 0 | 997  | 16.61667 | 9.77078  | 35.75969 | Unclassified | chr14:105513735-105578544 | 62.81    |
| <b>Hus1b</b>         | 0 | 0        | 0 | 15   | 0.25     | 0.370147 | 13       | Unclassified | chr13:31038712-31041543   | 0.832    |
| <b>Bspry</b>         | 0 | 0        | 0 | 98   | 1.633333 | 1.96326  | 4.432455 | Unclassified | chr4:62139100-62158332    | 17.233   |
| <b>Glyctk</b>        | 0 | 0        | 0 | 70   | 1.166667 | 1.55999  | 0.834633 | Unclassified | chr9:106055190-106062469  | 5.28     |
| <b>Xlr5b</b>         | 0 | 0        | 0 | 0    | 0        | 0        | 0        | Unclassified | chrX:70392179-70403738    | 9.56     |
| <b>Gm13124</b>       | 0 | 0        | 0 | 3    | 0.05     | 0        | 0.901342 | Unclassified | chr4:144144902-144157037  | 10.136   |
| <b>Naa20</b>         | 0 | 0        | 0 | 18   | 0.3      | 0        | 0.583078 | Unclassified | chr8:70045752-70072526    | 24.775   |
| <b>Ypel4</b>         | 0 | 0        | 0 | 17   | 0.283333 | 0.920321 | 2.158501 | Unclassified | chr2:84572360-84578034    | 3.675    |
| <b>Prmt8</b>         | 0 | 0        | 0 | 107  | 1.783333 | 0.445333 | 1.321397 | Unclassified | chr6:127639028-127720747  | 79.72    |
| <b>Tacc1</b>         | 0 | 0        | 0 | 1785 | 29.75    | 8.51078  | 8.688398 | Unclassified | chr8:26265023-26313921    | 46.899   |
| <b>Neurod2</b>       | 0 | 0        | 0 | 11   | 0.183333 | 0.3349   | 0.947214 | Unclassified | chr11:98186730-98192959   | 4.23     |
| <b>Rps29</b>         | 0 | 0        | 0 | 401  | 6.683333 | 144.71   | 4.665201 | Unclassified | chr12:70258708-70262173   | 1.466    |
| <b>Zfp455</b>        | 0 | 0        | 0 | 59   | 0.983333 | 0.709454 | 6.626807 | Unclassified | chr13:67293441-67310234   | 14.794   |
| <b>OlfR1166</b>      | 0 | 0        | 0 | 0    | 0        | 0.009457 | 0        | Unclassified | chr2:87963516-87967150    | 1.635    |
| <b>Zfp595</b>        | 0 | 0        | 0 | 137  | 2.283333 | 1.3378   | 19.71472 | Stalled      | chr13:67413933-67435496   | 19.564   |
| <b>Vps37d</b>        | 0 | 0        | 0 | 45   | 0.75     | 0.467676 | 2.527974 | Unclassified | chr5:135548770-135556136  | 5.367    |
| <b>Rxfp1</b>         | 0 | 0        | 0 | 73   | 1.216667 | 0.073172 | 0        | Unclassified | chr3:79448637-79543716    | 93.08    |
| <b>Optc</b>          | 0 | 0        | 0 | 23   | 0.383333 | 0.142872 | 2.248464 | Unclassified | chr1:135793771-135806576  | 10.806   |
| <b>Lmnb2</b>         | 0 | 0        | 0 | 485  | 8.083333 | 13.5917  | 5.802228 | Unclassified | chr10:80364107-80382990   | 16.884   |
| <b>Lmna</b>          | 0 | 0        | 0 | 252  | 4.2      | 2.58872  | 5.873892 | Unclassified | chr3:88285070-88309254    | 22.185   |
| <b>Lmo2</b>          | 0 | 0        | 0 | 929  | 15.48333 | 73.449   | 0.048183 | Unclassified | chr2:103796151-103822034  | 23.884   |
| <b>OlfR152</b>       | 0 | 0        | 0 | 2    | 0.033333 | 0        | 2        | Unclassified | chr2:87620692-87623643    | 0.952    |
| <b>Gm10565</b>       | 0 | 0        | 0 | 17   | 0.283333 | 0.368061 | 3.184142 | Unclassified | chr4:141638212-141644014  | 3.803    |
| <b>Ramp2</b>         | 0 | 0        | 0 | 13   | 0.216667 | 0.499719 | 1.306629 | Unclassified | chr11:101105647-101109564 | 1.918    |
| <b>Sic17a3</b>       | 0 | 0        | 0 | 26   | 0.433333 | 0.038965 | 0.447904 | Unclassified | chr13:23929302-23952583   | 21.282   |
| <b>AW209491</b>      | 0 | 0        | 0 | 217  | 3.616667 | 3.62775  | 23.73727 | Stalled      | chr13:14720511-14730469   | 7.959    |
| <b>Ywhab</b>         | 0 | 0        | 0 | 732  | 12.2     | 42.7118  | 12.51395 | Unclassified | chr2:163818932-163844323  | 23.392   |
| <b>Sic4a4</b>        | 0 | 0        | 0 | 261  | 4.35     | 0.055419 | 2.333328 | Unclassified | chr5:89314284-89668681    | 352.398  |
| <b>Ndufa1</b>        | 0 | 0        | 0 | 119  | 1.983333 | 124.414  | 15.58316 | Stalled      | chrX:34727583-34733233    | 3.651    |
| <b>Kcnip1</b>        | 0 | 0        | 0 | 250  | 4.166667 | 0        | 0.460746 | Unclassified | chr11:33529779-33745527   | 213.749  |
| <b>Secisbp2l</b>     | 0 | 0        | 0 | 512  | 8.533333 | 7.08493  | 10.84771 | Unclassified | chr2:125562721-125610606  | 45.886   |
| <b>Basp1</b>         | 0 | 0        | 0 | 106  | 1.766667 | 7.4374   | 3.263232 | Unclassified | chr15:25293032-25345519   | 50.488   |
| <b>Ppp4r1</b>        | 0 | 0        | 0 | 1248 | 20.8     | 7.19127  | 11.09151 | Unclassified | chr17:66130694-66191266   | 58.573   |
| <b>Steap1</b>        | 0 | 0        | 0 | 6    | 0.1      | 0.042159 | 1.714224 | Unclassified | chr5:5736321-5751317      | 12.997   |
| <b>Krcc1</b>         | 0 | 0        | 0 | 484  | 8.066667 | 5.8026   | 26.54451 | Unclassified | chr6:71220012-71235313    | 13.302   |

|                      |   |          |   |      |          |          |          |              |                           |         |
|----------------------|---|----------|---|------|----------|----------|----------|--------------|---------------------------|---------|
| <b>Olfir902</b>      | 0 | 0        | 0 | 1    | 0.016667 | 0        | 0        | Unclassified | chr9:38254376-38257431    | 1.056   |
| <b>1700090G07Rik</b> | 0 | 0        | 0 | 10   | 0.166667 | 0        | 0.802395 | Unclassified | chr17:87314687-87321706   | 5.02    |
| <b>Tcf20</b>         | 0 | 0        | 0 | 1155 | 19.25    | 8.7811   | 0.327639 | Unclassified | chr15:82639054-82744564   | 103.511 |
| <b>Hnf1b</b>         | 0 | 0        | 0 | 112  | 1.866667 | 1.17349  | 1.392674 | Unclassified | chr11:83662370-83719317   | 54.948  |
| <b>Zeb1</b>          | 0 | 0        | 0 | 1329 | 22.15    | 3.72952  | 22.18053 | Unclassified | chr18:5589888-5774909     | 183.022 |
| <b>Tlr13</b>         | 0 | 0        | 0 | 13   | 0.216667 | 0.047894 | 1.237223 | Unclassified | chrX:103336613-103355832  | 17.22   |
| <b>Pnn</b>           | 0 | 0        | 0 | 608  | 10.13333 | 54.6163  | 10.7425  | Unclassified | chr12:60165905-60175004   | 7.1     |
| <b>Pnmt</b>          | 0 | 0        | 0 | 7    | 0.116667 | 0.072164 | 0.567896 | Unclassified | chr11:98245945-98249411   | 1.467   |
| <b>Tcfap2b</b>       | 0 | 0        | 0 | 31   | 0.516667 | 0.126978 | 0        | Unclassified | chr1:19196994-19228815    | 29.822  |
| <b>Tcfap2a</b>       | 0 | 0        | 0 | 90   | 1.5      | 0.642239 | 0.164666 | Unclassified | chr13:40811043-40831192   | 18.15   |
| <b>1700084C01Rik</b> | 0 | 0        | 0 | 5    | 0.083333 | 0.080102 | 0.611198 | Unclassified | chr1:171857069-171864784  | 5.716   |
| <b>Defa-ps13</b>     | 0 | 0        | 0 | 2    | 0.033333 | 0        | 0.757223 | Unclassified | chr8:19298676-19304794    | 4.119   |
| <b>Olfir52</b>       | 0 | 0        | 0 | 1    | 0.016667 | 0        | 1        | Unclassified | chr2:86021306-86024266    | 0.961   |
| <b>Ccdc73</b>        | 0 | 0        | 0 | 224  | 3.733333 | 0.133629 | 0.335152 | Unclassified | chr2:104724480-104839894  | 113.415 |
| <b>Olfir1394</b>     | 0 | 0        | 0 | 1    | 0.016667 | 0        | 1        | Unclassified | chr11:48971517-48974456   | 0.94    |
| <b>Nes</b>           | 0 | 0        | 0 | 43   | 0.716667 | 0.786612 | 3.508393 | Unclassified | chr3:87773014-87784373    | 9.36    |
| <b>Defb43</b>        | 0 | 0        | 0 | 11   | 0.183333 | 0        | 0.742929 | Unclassified | chr14:63628607-63636925   | 6.319   |
| <b>Defb25</b>        | 0 | 0        | 0 | 1    | 0.016667 | 0.131225 | 1        | Unclassified | chr2:152448091-152450789  | 0.699   |
| <b>Frmppd1</b>       | 0 | 0        | 0 | 117  | 1.95     | 0.077239 | 1.923396 | Unclassified | chr4:45195777-45298808    | 101.032 |
| <b>Olfir1311</b>     | 0 | 0        | 0 | 3    | 0.05     | 0        | 1        | Unclassified | chr2:111861070-111864009  | 0.94    |
| <b>Mgat4c</b>        | 0 | 0        | 0 | 6    | 0.1      | 0.01707  | 0        | Unclassified | chr10:101835070-101854100 | 17.031  |
| <b>Mrfap1</b>        | 0 | 0        | 0 | 271  | 4.516667 | 52.1108  | 34.72067 | Unclassified | chr5:37186105-37189993    | 1.889   |
| <b>Tmem35</b>        | 0 | 0        | 0 | 8    | 0.133333 | 0.287332 | 1.418013 | Unclassified | chrX:130827763-130840508  | 10.746  |
| <b>Wdr48</b>         | 0 | 0        | 0 | 715  | 11.91667 | 6.49795  | 9.403743 | Unclassified | chr9:119802012-119835697  | 31.686  |
| <b>Pias1</b>         | 0 | 128.7278 | 0 | 1019 | 16.98333 | 4.68704  | 19.76954 | Unclassified | chr9:62727883-62830686    | 100.804 |
| <b>Nek1</b>          | 0 | 0        | 0 | 804  | 13.4     | 7.66021  | 53.89178 | Stalled      | chr8:63470016-63609031    | 137.016 |
| <b>Gm12657</b>       | 0 | 0        | 0 | 58   | 0.966667 | 0        | 1.308573 | Unclassified | chr4:94258340-94267010    | 6.671   |
| <b>Cnn3</b>          | 0 | 0        | 0 | 559  | 9.316667 | 16.9059  | 14.78398 | Unclassified | chr3:121127458-121161123  | 31.666  |
| <b>Tslp</b>          | 0 | 0        | 0 | 8    | 0.133333 | 0.204879 | 0        | Unclassified | chr18:32973036-32979455   | 4.422   |
| <b>Erc2</b>          | 0 | 0        | 0 | 589  | 9.816667 | 0.02739  | 0.592954 | Unclassified | chr14:28433627-29291723   | 856.097 |
| <b>Snord82</b>       | 0 | 0        | 0 | 141  | 2.35     | 0        | 60       | Unclassified | chr1:88252834-88254902    | 0.069   |
| <b>Fbxo22</b>        | 0 | 0        | 0 | 430  | 7.166667 | 12.2855  | 19.49311 | Unclassified | chr9:55054741-55072240    | 15.5    |
| <b>Slc25a35</b>      | 0 | 0        | 0 | 118  | 1.966667 | 2.45804  | 6.883218 | Unclassified | chr11:68779632-68786017   | 4.386   |
| <b>Vwc2</b>          | 0 | 0        | 0 | 87   | 1.45     | 0.028656 | 0        | Unclassified | chr11:11012018-11163529   | 149.512 |
| <b>Gfra2</b>         | 0 | 0        | 0 | 118  | 1.966667 | 0.270246 | 1.776776 | Unclassified | chr14:71287936-71379645   | 89.71   |
| <b>Timm23</b>        | 0 | 0        | 0 | 826  | 13.76667 | 7.58416  | 10.23783 | Unclassified | chr14:32993351-33017077   | 21.727  |
| <b>Tmem22</b>        | 0 | 0        | 0 | 23   | 0.383333 | 0.226408 | 1.49578  | Unclassified | chr9:100452606-100473504  | 18.899  |
| <b>Btg4</b>          | 0 | 0        | 0 | 2    | 0.033333 | 0.019552 | 0        | Unclassified | chr9:50922105-50927805    | 3.701   |
| <b>Atp5a1</b>        | 0 | 0        | 0 | 858  | 14.3     | 243.672  | 6.260034 | Unclassified | chr18:78010506-78021607   | 9.102   |
| <b>Fbxw9</b>         | 0 | 0        | 0 | 137  | 2.283333 | 10.3724  | 6.967395 | Unclassified | chr8:87582017-87591019    | 7.003   |
| <b>Zbtb24</b>        | 0 | 0        | 0 | 504  | 8.4      | 4.97922  | 18.84607 | Unclassified | chr10:41168201-41185380   | 15.18   |
| <b>Elac2</b>         | 0 | 0        | 0 | 586  | 9.766667 | 14.3717  | 13.50277 | Unclassified | chr11:64790536-64815578   | 23.043  |
| <b>Mrpl46</b>        | 0 | 0        | 0 | 262  | 4.366667 | 31.17    | 12.69231 | Unclassified | chr7:85920226-85929975    | 7.75    |
| <b>AI427809</b>      | 0 | 0        | 0 | 10   | 0.166667 | 0.063041 | 1.223482 | Unclassified | chr4:53274227-53285104    | 8.878   |
| <b>Prrx2</b>         | 0 | 0        | 0 | 89   | 1.483333 | 0.090977 | 0.298426 | Unclassified | chr2:30698886-30736765    | 35.88   |
| <b>Gpx7</b>          | 0 | 0        | 0 | 53   | 0.883333 | 1.84661  | 13.65209 | Stalled      | chr4:108072821-108081318  | 6.498   |
| <b>Fam164a</b>       | 0 | 0        | 0 | 53   | 0.883333 | 0.183036 | 12.9054  | Stalled      | chr3:7501425-7553848      | 50.424  |
| <b>Olfir65</b>       | 0 | 0        | 0 | 1    | 0.016667 | 0        | 1        | Unclassified | chr7:111049970-111056050  | 4.081   |
| <b>Olfir66</b>       | 0 | 0        | 0 | 4    | 0.066667 | 0        | 3        | Unclassified | chr7:111029819-111032755  | 0.937   |
| <b>Olfir64</b>       | 0 | 0        | 0 | 3    | 0.05     | 0        | 2        | Unclassified | chr7:111041323-111044985  | 1.663   |
| <b>Olfir60</b>       | 0 | 0        | 0 | 1    | 0.016667 | 0.07811  | 1        | Unclassified | chr7:147530950-147533886  | 0.937   |
| <b>Olfir62</b>       | 0 | 0        | 0 | 1    | 0.016667 | 0.040601 | 0        | Unclassified | chr4:118336123-118339070  | 0.948   |
| <b>Slc22a7</b>       | 0 | 0        | 0 | 20   | 0.333333 | 0.134102 | 0.745844 | Unclassified | chr17:46569133-46577426   | 6.294   |
| <b>Lce1i</b>         | 0 | 0        | 0 | 1    | 0.016667 | 0        | 1        | Unclassified | chr3:92581131-92584821    | 1.691   |
| <b>Gm6890</b>        | 0 | 0        | 0 | 0    | 0        | 0        | 0        | Unclassified | chrX:71984265-71987527    | 1.263   |
| <b>Olfir67</b>       | 0 | 0        | 0 | 6    | 0.1      | 0.020638 | 0        | Unclassified | chr7:110935725-110942344  | 4.62    |
| <b>Nedd1</b>         | 0 | 0        | 0 | 414  | 6.9      | 2.96663  | 40.0552  | Stalled      | chr10:92147489-92187163   | 37.675  |
| <b>Gbp2</b>          | 0 | 0        | 0 | 233  | 3.883333 | 60.8842  | 4.005014 | Unclassified | chr3:142281626-142300972  | 17.347  |
| <b>Ndufs4</b>        | 0 | 0        | 0 | 556  | 9.266667 | 31.0255  | 21.00112 | Stalled      | chr13:115078003-115180302 | 100.3   |
| <b>S100b</b>         | 0 | 0        | 0 | 32   | 0.533333 | 0.169753 | 0.365507 | Unclassified | chr10:75714580-75724064   | 7.485   |
| <b>Gata3</b>         | 0 | 0        | 0 | 28   | 0.466667 | 0.769258 | 0.882297 | Unclassified | chr2:9778704-9802227      | 21.524  |
| <b>Gata4</b>         | 0 | 0        | 0 | 61   | 1.016667 | 0.162318 | 2.428948 | Unclassified | chr14:63817751-63866097   | 46.347  |
| <b>Gata1</b>         | 0 | 0        | 0 | 10   | 0.166667 | 0.099296 | 0        | Unclassified | chrX:7536385-7546941      | 8.557   |
| <b>Ppia</b>          | 0 | 0        | 0 | 1507 | 25.11667 | 0        | 7.537954 | Unclassified | chr11:6313872-6319813     | 3.942   |
| <b>Gbas</b>          | 0 | 0        | 0 | 464  | 7.333333 | 6.06539  | 20.1682  | Unclassified | chr5:130228949-130264201  | 33.253  |
| <b>Gata5</b>         | 0 | 0        | 0 | 23   | 0.383333 | 0.036869 | 1.747042 | Unclassified | chr2:180059792-180071384  | 9.593   |
| <b>Gata6</b>         | 0 | 0        | 0 | 33   | 0.55     | 0.09229  | 1.017853 | Unclassified | chr18:11050507-11085633   | 33.127  |
| <b>Otop2</b>         | 0 | 0        | 0 | 50   | 0.833333 | 0.098798 | 0.33007  | Unclassified | chr11:115166476-115193617 | 25.142  |
| <b>Usp31</b>         | 0 | 0        | 0 | 489  | 8.15     | 1.15618  | 15.34863 | Unclassified | chr7:128785535-128852767  | 65.233  |
| <b>Mov10</b>         | 0 | 0        | 0 | 384  | 6.4      | 8.30278  | 14.58273 | Unclassified | chr3:104597749-104623223  | 23.475  |
| <b>Kcns1</b>         | 0 | 0        | 0 | 63   | 1.05     | 1.52603  | 0.756874 | Unclassified | chr2:163989354-163998849  | 7.496   |
| <b>Cdr2l</b>         | 0 | 0        | 0 | 33   | 0.55     | 0.325604 | 0.597856 | Unclassified | chr11:115241229-115257446 | 14.218  |
| <b>Lilra5</b>        | 0 | 0        | 0 | 7    | 0.116667 | 0.048616 | 1.081621 | Unclassified | chr7:4187355-4195065      | 5.711   |
| <b>Epm2a</b>         | 0 | 0        | 0 | 152  | 2.533333 | 1.38939  | 32.93896 | Stalled      | chr10:11061242-11177275   | 114.034 |
| <b>Ephx2</b>         | 0 | 0        | 0 | 60   | 1        | 0.352685 | 3.950912 | Unclassified | chr14:66703213-66745337   | 40.125  |
| <b>Vps33b</b>        | 0 | 0        | 0 | 384  | 6.4      | 10.4503  | 10.91751 | Unclassified | chr7:87412540-87436465    | 21.926  |
| <b>Epo</b>           | 0 | 0        | 0 | 10   | 0.166667 | 0.053775 | 0.408729 | Unclassified | chr5:137924247-137929044  | 2.798   |
| <b>Ppp1r12c</b>      | 0 | 0        | 0 | 737  | 12.28333 | 30.622   | 8.922957 | Unclassified | chr7:4433122-4455282      | 20.161  |
| <b>Epn2</b>          | 0 | 0        | 0 | 156  | 2.6      | 0.353112 | 7.021101 | Unclassified | chr11:61330750-61395153   | 62.404  |
| <b>Tmod3</b>         | 0 | 0        | 0 | 490  | 8.166667 | 13.5211  | 23.01157 | Unclassified | chr9:75345590-75409464    | 61.875  |
| <b>Tmod4</b>         | 0 | 0        | 0 | 105  | 1.75     | 0.154624 | 0.480023 | Unclassified | chr3:94926435-94933130    | 4.696   |
| <b>Gpr98</b>         | 0 | 0        | 0 | 336  | 5.6      | 0.040449 | 0.61586  | Unclassified | chr13:81234066-81774143   | 538.078 |
| <b>Btbd3</b>         | 0 | 0        | 0 | 20   | 0.333333 | 0.074605 | 0.637062 | Unclassified | chr2:138080319-138113158  | 30.84   |
| <b>Vash1</b>         | 0 | 0        | 0 | 91   | 1.516667 | 1.69593  | 3.159894 | Unclassified | chr12:88017649-88036630   | 16.982  |
| <b>DOH4S114</b>      | 0 | 0        | 0 | 22   | 0.366667 | 0.218939 | 4.550735 | Unclassified | chr18:33596672-33625683   | 27.012  |
| <b>Itgal</b>         | 0 | 0        | 0 | 1305 | 21.75    | 57.6333  | 4.696855 | Unclassified | chr7:134437861-134477412  | 37.552  |

|               |   |   |   |      |          |           |          |              |                           |         |
|---------------|---|---|---|------|----------|-----------|----------|--------------|---------------------------|---------|
| Olfr728       | 0 | 0 | 0 | 0    | 0        | 0         | 0        | Unclassified | chr14:50759376-50762312   | 0.937   |
| Tesk2         | 0 | 0 | 0 | 394  | 6.566667 | 4.56105   | 12.69813 | Stalled      | chr4:116391559-116476853  | 83.295  |
| Tmem145       | 0 | 0 | 0 | 19   | 0.316667 | 0.418132  | 1.292949 | Unclassified | chr7:26089126-26101214    | 10.089  |
| Plin5         | 0 | 0 | 0 | 58   | 0.966667 | 0.078144  | 0.265367 | Unclassified | chr17:56251023-56258971   | 5.949   |
| Trit1         | 0 | 0 | 0 | 671  | 11.18333 | 7.06987   | 9.11293  | Unclassified | chr4:122691839-122732177  | 38.339  |
| Golt1b        | 0 | 0 | 0 | 653  | 10.88333 | 6.13683   | 20.44566 | Unclassified | chr6:142333762-142352378  | 16.617  |
| Ctu2          | 0 | 0 | 0 | 557  | 9.283333 | 13.327    | 2.424796 | Elongating   | chr8:124998042-125006992  | 6.951   |
| Olfr191       | 0 | 0 | 0 | 0    | 0        | 0.026291  | 0        | Unclassified | chr16:59085377-59088307   | 0.931   |
| Olfr198       | 0 | 0 | 0 | 1    | 0.016667 | 0.090435  | 1        | Unclassified | chr16:59201329-59204250   | 0.922   |
| Gm10334       | 0 | 0 | 0 | 2    | 0.033333 | 0.012703  | 0.7426   | Unclassified | chr6:41392212-41398096    | 3.885   |
| Mageb3        | 0 | 0 | 0 | 423  | 7.05     | 3.64338   | 219.8356 | Stalled      | chr2:121779506-121783828  | 2.323   |
| 1700034015Rik | 0 | 0 | 0 | 1    | 0.016667 | 0.034592  | 0        | Unclassified | chr6:41632429-41635716    | 1.288   |
| Sic25a41      | 0 | 0 | 0 | 67   | 1.116667 | 0.198622  | 0.108172 | Unclassified | chr17:57172194-57183077   | 8.884   |
| Dmrt2         | 0 | 0 | 0 | 57   | 0.95     | 0.839345  | 2.221951 | Unclassified | chr4:109648629-109656289  | 5.661   |
| Defb7         | 0 | 0 | 0 | 1    | 0.016667 | 0         | 0        | Unclassified | chr8:19493096-19497775    | 2.68    |
| Zdhhc19       | 0 | 0 | 0 | 24   | 0.4      | 0.214964  | 0        | Unclassified | chr16:32494366-32507300   | 10.935  |
| Wscd2         | 0 | 0 | 0 | 135  | 2.25     | 0.020854  | 0        | Unclassified | chr5:113917466-114039679  | 120.214 |
| Tmem40        | 0 | 0 | 0 | 68   | 1.133333 | 0.0519601 | 7.324873 | Unclassified | chr6:115679158-115711017  | 29.86   |
| Nut           | 0 | 0 | 0 | 45   | 0.75     | 0.048091  | 1.49788  | Unclassified | chr2:112088104-112101448  | 11.345  |
| Onecut2       | 0 | 0 | 0 | 57   | 0.95     | 0.053597  | 1.02813  | Unclassified | chr18:64498017-64458142   | 58.126  |
| Gucy2f        | 0 | 0 | 0 | 30   | 0.5      | 0.009468  | 0.798293 | Unclassified | chrX:138515702-138633474  | 115.773 |
| Rhcg          | 0 | 0 | 0 | 45   | 0.75     | 0.116568  | 0.346162 | Unclassified | chr7:86738249-86764543    | 24.295  |
| Gm101         | 0 | 0 | 0 | 67   | 1.116667 | 0.030624  | 0.520978 | Unclassified | chr1:121820095-121893787  | 71.693  |
| Pxmp2         | 0 | 0 | 0 | 327  | 5.45     | 5.31917   | 90.26101 | Stalled      | chr5:110703304-110717187  | 11.884  |
| Nupr1         | 0 | 0 | 0 | 29   | 0.483333 | 1.57554   | 2.158029 | Unclassified | chr7:133766759-133770984  | 2.226   |
| Ppig          | 0 | 0 | 0 | 527  | 8.783333 | 9.47096   | 29.09755 | Unclassified | chr2:69559144-69592116    | 30.973  |
| Vmn2r-ps11    | 0 | 0 | 0 | 47   | 0.783333 | 0.005159  | 0.820929 | Unclassified | chr3:64436784-64650665    | 211.882 |
| Nol4          | 0 | 0 | 0 | 143  | 2.383333 | 0.124768  | 0.709908 | Unclassified | chr18:22851655-23202154   | 348.5   |
| Calb2         | 0 | 0 | 0 | 29   | 0.483333 | 0.026869  | 0.477453 | Unclassified | chr8:112666437-112694106  | 25.67   |
| C1ql2         | 0 | 0 | 0 | 9    | 0.15     | 0.454786  | 0.569896 | Unclassified | chr1:122235158-122239751  | 2.594   |
| Oxnad1        | 0 | 0 | 0 | 312  | 5.2      | 6.942     | 43.6218  | Stalled      | chr14:32896913-32916389   | 17.477  |
| Ccnk          | 0 | 0 | 0 | 825  | 13.75    | 18.8514   | 7.336684 | Unclassified | chr12:109415947-109441569 | 23.623  |
| Kif24         | 0 | 0 | 0 | 712  | 11.86667 | 3.7931    | 32.08742 | Unclassified | chr4:41337780-41413881    | 74.102  |
| Hmgn2         | 0 | 0 | 0 | 533  | 8.883333 | 20.9414   | 13.21926 | Unclassified | chr4:133520653-133525906  | 3.254   |
| Sic7a9        | 0 | 0 | 0 | 22   | 0.366667 | 0.0203    | 0.454368 | Unclassified | chr7:36232197-36251018    | 16.822  |
| Polk          | 0 | 0 | 0 | 464  | 7.733333 | 3.53577   | 58.92258 | Stalled      | chr13:97250643-97314440   | 61.798  |
| Ccr6          | 0 | 0 | 0 | 180  | 3        | 3.70878   | 1.737259 | Elongating   | chr17:8433390-8449992     | 14.603  |
| Cttnbp2nl     | 0 | 0 | 0 | 69   | 1.15     | 0.279968  | 3.645508 | Unclassified | chr3:104804834-104858064  | 51.231  |
| Wdr75         | 0 | 0 | 0 | 567  | 9.45     | 10.3076   | 19.68325 | Unclassified | chr1:45850345-45880458    | 28.114  |
| Bckdk         | 0 | 0 | 0 | 282  | 4.7      | 10.5444   | 11.57851 | Unclassified | chr7:135045586-135053178  | 5.593   |
| Defb30        | 0 | 0 | 0 | 5    | 0.083333 | 0.090712  | 0        | Unclassified | chr14:63652923-63658670   | 3.748   |
| Olfr1082      | 0 | 0 | 0 | 1    | 0.016667 | 0.019403  | 0        | Unclassified | chr2:86434041-86440966    | 4.926   |
| Unc5c         | 0 | 0 | 0 | 191  | 3.183333 | 0.054212  | 1.331358 | Unclassified | chr3:141126527-141497886  | 369.36  |
| Tex19.1       | 0 | 0 | 0 | 6    | 0.1      | 0.04422   | 0.561841 | Unclassified | chr11:121005456-121009627 | 2.172   |
| Ung           | 0 | 0 | 0 | 503  | 8.383333 | 18.1189   | 3.08906  | Unclassified | chr5:114578443-114589330  | 8.888   |
| Olfr606       | 0 | 0 | 0 | 3    | 0.05     | 0         | 2        | Unclassified | chr7:110597852-110600812  | 0.961   |
| Cpne4         | 0 | 0 | 0 | 338  | 5.633333 | 0.052515  | 0        | Unclassified | chr9:104470117-104936874  | 464.758 |
| Bcl2a1a       | 0 | 0 | 0 | 4    | 0.066667 | 30.7964   | 1.384426 | Unclassified | chr9:88849757-88857254    | 5.498   |
| Rd3           | 0 | 0 | 0 | 31   | 0.516667 | 0.326164  | 0.898022 | Unclassified | chr1:193799269-193809795  | 8.527   |
| Taf4b         | 0 | 0 | 0 | 983  | 16.38333 | 2.9067    | 57.07296 | Unclassified | chr18:14939753-15058868   | 117.116 |
| Dzip1l        | 0 | 0 | 0 | 40   | 0.666667 | 0.032628  | 0.51099  | Unclassified | chr9:99528013-99569675    | 39.663  |
| Ier5l         | 0 | 0 | 0 | 131  | 2.183333 | 4.75988   | 25.8125  | Unclassified | chr2:30328160-30331719    | 1.56    |
| 2610507B11Rik | 0 | 0 | 0 | 591  | 9.85     | 17.5799   | 16.87873 | Unclassified | chr11:78073255-78104128   | 28.874  |
| Cwf191l       | 0 | 0 | 0 | 654  | 10.9     | 4.24654   | 8.637434 | Unclassified | chr19:44183126-44212366   | 27.241  |
| Olfr993       | 0 | 0 | 0 | 0    | 0        | 0.016352  | 0        | Unclassified | chr2:85254089-85257034    | 0.946   |
| Odf3l2        | 0 | 0 | 0 | 12   | 0.2      | 0.051348  | 1.578326 | Unclassified | chr10:79102270-79110483   | 6.214   |
| Rps6kb1       | 0 | 0 | 0 | 858  | 14.3     | 7.83252   | 23.94276 | Unclassified | chr11:86312512-86360309   | 45.798  |
| Kctd3         | 0 | 0 | 0 | 597  | 9.95     | 5.614     | 8.402006 | Unclassified | chr1:190794976-190833719  | 36.744  |
| Tnip2         | 0 | 0 | 0 | 514  | 8.566667 | 15.0628   | 9.826588 | Unclassified | chr5:34838744-34858628    | 17.885  |
| Bcl2l10       | 0 | 0 | 0 | 9    | 0.15     | 0.03131   | 0.837885 | Unclassified | chr9:75193564-75199447    | 3.884   |
| Dok7          | 0 | 0 | 0 | 52   | 0.866667 | 0.041293  | 0        | Unclassified | chr5:35397732-35430480    | 30.749  |
| Zfp462        | 0 | 0 | 0 | 113  | 1.883333 | 0.068346  | 0        | Unclassified | chr4:54958816-55096435    | 135.62  |
| Kdm3b         | 0 | 0 | 0 | 1098 | 18.3     | 10.6099   | 9.630907 | Unclassified | chr18:34934661-34999024   | 62.364  |
| Zfp763        | 0 | 0 | 0 | 130  | 2.166667 | 2.10531   | 4.95955  | Unclassified | chr17:33153808-33172326   | 16.519  |
| Cyp2d22       | 0 | 0 | 0 | 39   | 0.65     | 0.577057  | 1.664344 | Unclassified | chr15:82200957-82212690   | 9.734   |
| Actr10        | 0 | 0 | 0 | 362  | 6.033333 | 4.60438   | 30.5731  | Stalled      | chr12:72036843-72065702   | 26.86   |
| Dnaja2        | 0 | 0 | 0 | 763  | 12.71667 | 36.7512   | 18.72015 | Unclassified | chr8:88061538-88081170    | 17.633  |
| Arpc1a        | 0 | 0 | 0 | 583  | 9.716667 | 36.4442   | 9.61432  | Unclassified | chr5:145842737-145869625  | 24.889  |
| Nat6          | 0 | 0 | 0 | 196  | 3.266667 | 8.26002   | 2.083472 | Elongating   | chr9:107480500-107486379  | 3.88    |
| Tmem87b       | 0 | 0 | 0 | 322  | 5.366667 | 2.12904   | 29.51559 | Stalled      | chr2:128642038-128679997  | 35.96   |
| Gabrq         | 0 | 0 | 0 | 6    | 0.1      | 0.012816  | 0.707773 | Unclassified | chrX:70068774-70083883    | 13.11   |
| Ly6i          | 0 | 0 | 0 | 9    | 0.15     | 11.4452   | 1.031496 | Unclassified | chr15:74810241-74815860   | 3.62    |
| AI894139      | 0 | 0 | 0 | 586  | 9.766667 | 0         | 4.680234 | Unclassified | chr6:47901388-47915296    | 11.909  |
| Zfp276        | 0 | 0 | 0 | 429  | 7.15     | 7.17126   | 5.428826 | Unclassified | chr8:125776094-125794451  | 16.358  |
| Skint7        | 0 | 0 | 0 | 1    | 0.016667 | 0.031997  | 0        | Unclassified | chr4:111643531-111660824  | 15.294  |
| Olfr604       | 0 | 0 | 0 | 1    | 0.016667 | 0.034041  | 1        | Unclassified | chr7:110531575-110534514  | 0.94    |
| Olfr686       | 0 | 0 | 0 | 1    | 0.016667 | 0         | 0        | Unclassified | chr7:112351901-112354855  | 0.955   |
| Olfr166       | 0 | 0 | 0 | 1    | 0.016667 | 0.061339  | 0        | Unclassified | chr16:19484932-19487871   | 0.94    |
| Nkx3-2        | 0 | 0 | 0 | 17   | 0.283333 | 0.46353   | 0.647733 | Unclassified | chr5:42152721-42157459    | 2.739   |
| Barx1         | 0 | 0 | 0 | 7    | 0.116667 | 0.386091  | 0.661849 | Unclassified | chr13:48756404-48761876   | 3.473   |
| Olfr1352      | 0 | 0 | 0 | 1    | 0.016667 | 0.041343  | 0        | Unclassified | chr10:78444536-78447466   | 0.931   |
| Prkar2a       | 0 | 0 | 0 | 306  | 5.1      | 4.71826   | 13.70404 | Stalled      | chr9:108592473-108651842  | 57.37   |
| Olfr656       | 0 | 0 | 0 | 1    | 0.016667 | 0.051783  | 0        | Unclassified | chr7:111764170-111767160  | 0.991   |
| Bax           | 0 | 0 | 0 | 313  | 5.216667 | 110.595   | 5.167236 | Unclassified | chr7:52717064-52724268    | 5.205   |
| Zranb3        | 0 | 0 | 0 | 468  | 7.8      | 3.08457   | 10.64144 | Stalled      | chr1:129850762-130000985  | 148.224 |
| Ctdspl        | 0 | 0 | 0 | 249  | 4.15     | 0.375164  | 2.804336 | Unclassified | chr9:118833653-118953237  | 117.585 |

|               |   |   |   |      |          |          |          |              |                           |         |
|---------------|---|---|---|------|----------|----------|----------|--------------|---------------------------|---------|
| Zfp607        | 0 | 0 | 0 | 274  | 4.566667 | 2.14621  | 24.55582 | Stalled      | chr7:28643603-28665844    | 20.242  |
| Mtap7d1       | 0 | 0 | 0 | 516  | 8.6      | 19.3035  | 16.90644 | Unclassified | chr4:125909413-125935563  | 24.151  |
| Grm5          | 0 | 0 | 0 | 220  | 3.666667 | 0.185397 | 2.153933 | Unclassified | chr7:94730677-95283573    | 550.897 |
| Senp6         | 0 | 0 | 0 | 1570 | 26.16667 | 14.4213  | 12.10083 | Unclassified | chr9:79912709-79992587    | 77.879  |
| Ddah1         | 0 | 0 | 0 | 115  | 1.916667 | 0.16076  | 0        | Unclassified | chr3:145419655-145557241  | 135.587 |
| Fam159a       | 0 | 0 | 0 | 37   | 0.616667 | 0.56133  | 2.006793 | Unclassified | chr4:108040381-108057954  | 15.574  |
| Sat2          | 0 | 0 | 0 | 5    | 0.083333 | 0.276089 | 0.275887 | Unclassified | chr11:69433610-69437371   | 1.762   |
| Tshz3         | 0 | 0 | 0 | 60   | 1        | 0.017936 | 0.566015 | Unclassified | chr7:37481136-37558476    | 75.341  |
| Plekha4       | 0 | 0 | 0 | 500  | 8.333333 | 0.708271 | 100.9749 | Stalled      | chr7:52779699-52809599    | 27.901  |
| Ccdc23        | 0 | 0 | 0 | 100  | 1.666667 | 19.07    | 6.93901  | Unclassified | chr4:118865914-118873903  | 5.99    |
| Spag1         | 0 | 0 | 0 | 91   | 1.516667 | 0.08958  | 1.986051 | Unclassified | chr1:75369871-75428881    | 57.011  |
| Myst3         | 0 | 0 | 0 | 1320 | 22       | 8.71638  | 22.24787 | Unclassified | chr8:23968010-24053734    | 83.725  |
| Zfp828        | 0 | 0 | 0 | 407  | 6.783333 | 8.20844  | 8.396596 | Unclassified | chr8:13867640-13881638    | 11.999  |
| Gstt4         | 0 | 0 | 0 | 16   | 0.266667 | 0.199839 | 1.269231 | Unclassified | chr10:75277689-75287288   | 7.6     |
| Epdr1         | 0 | 0 | 0 | 24   | 0.4      | 0.623996 | 3.073567 | Unclassified | chr13:19683577-19713699   | 28.123  |
| Grm7          | 0 | 0 | 0 | 387  | 6.45     | 0.018392 | 0.706206 | Unclassified | chr6:110593591-111517224  | 921.634 |
| Egfl8         | 0 | 0 | 0 | 47   | 0.783333 | 0.156114 | 0.529994 | Unclassified | chr17:34750294-34754916   | 2.623   |
| Fam5c         | 0 | 0 | 0 | 139  | 2.316667 | 0.042722 | 0        | Unclassified | chr1:148340795-148749602  | 406.808 |
| Hdc           | 0 | 0 | 0 | 83   | 1.383333 | 0.614408 | 0.230762 | Unclassified | chr2:126419403-126446401  | 24.999  |
| Tbx19         | 0 | 0 | 0 | 27   | 0.45     | 0.077033 | 0.477375 | Unclassified | chr1:167067983-167092904  | 22.922  |
| Strc          | 0 | 0 | 0 | 25   | 0.416667 | 0.020036 | 1.307134 | Unclassified | chr2:121189462-121208676  | 17.215  |
| Sec22a        | 0 | 0 | 0 | 316  | 5.266667 | 1.09469  | 28.17204 | Stalled      | chr16:35311216-35366004   | 52.789  |
| Masp2         | 0 | 0 | 0 | 1035 | 17.25    | 0.075955 | 0.069546 | Unclassified | chr4:147974652-147989589  | 12.938  |
| Masp1         | 0 | 0 | 0 | 89   | 1.483333 | 0.060542 | 2.248138 | Unclassified | chr16:23451857-23522663   | 68.807  |
| Uhrf1bp1      | 0 | 0 | 0 | 600  | 10       | 5.51273  | 19.52278 | Unclassified | chr10:89205735-89282614   | 74.88   |
| Cdc23         | 0 | 0 | 0 | 522  | 8.7      | 0        | 8.793287 | Unclassified | chr18:34791336-34813390   | 20.055  |
| Ascl1         | 0 | 0 | 0 | 8    | 0.133333 | 0.175877 | 0.576766 | Unclassified | chr10:86953785-86958405   | 2.621   |
| 4930505A04Rik | 0 | 0 | 0 | 18   | 0.3      | 0.069277 | 0        | Unclassified | chr11:30326005-30373829   | 45.825  |
| Matk          | 0 | 0 | 0 | 306  | 5.1      | 2.08432  | 0.385302 | Unclassified | chr10:80718289-80725726   | 5.438   |
| Fxyd3         | 0 | 0 | 0 | 8    | 0.133333 | 0        | 0.925116 | Unclassified | chr7:31855553-31863716    | 6.164   |
| Usp50         | 0 | 0 | 0 | 83   | 1.383333 | 0.021996 | 0        | Unclassified | chr2:126586785-126611196  | 22.412  |
| Hdac11        | 0 | 0 | 0 | 134  | 2.233333 | 1.89082  | 6.434633 | Unclassified | chr6:91104808-91124677    | 17.87   |
| Gpr149        | 0 | 0 | 0 | 31   | 0.516667 | 0.088362 | 0.712034 | Unclassified | chr3:62333884-62411062    | 75.179  |
| Fgd5          | 0 | 0 | 0 | 130  | 2.166667 | 0.047873 | 0.405248 | Unclassified | chr6:91935103-92025999    | 88.897  |
| Duoxa1        | 0 | 0 | 0 | 16   | 0.266667 | 0.068491 | 1.91482  | Unclassified | chr2:122129284-122141466  | 10.183  |
| Cdsn          | 0 | 0 | 0 | 14   | 0.233333 | 0.047858 | 1.00896  | Unclassified | chr17:35687072-35694125   | 5.054   |
| Apbh          | 0 | 0 | 0 | 3    | 0.05     | 0        | 3        | Unclassified | chr7:32075537-32078835    | 1.299   |
| Trpc6         | 0 | 0 | 0 | 68   | 1.133333 | 0.078652 | 0        | Unclassified | chr9:8542141-8680741      | 136.601 |
| Znhit1        | 0 | 0 | 0 | 229  | 3.816667 | 21.1577  | 3.0314   | Unclassified | chr5:137458070-137465752  | 5.683   |
| Cyp4f16       | 0 | 0 | 0 | 103  | 1.716667 | 2.13031  | 1.067722 | Unclassified | chr17:32671573-32688742   | 15.17   |
| Gm7092        | 0 | 0 | 0 | 6    | 0.1      | 0.126755 | 2        | Unclassified | chr7:26399639-26402911    | 1.273   |
| Olf952        | 0 | 0 | 0 | 0    | 0        | 0        | 0        | Unclassified | chr9:39233709-39236654    | 0.946   |
| Gspt2         | 0 | 0 | 0 | 12   | 0.2      | 1.10242  | 3.848311 | Unclassified | chrX:91879407-91883900    | 2.494   |
| Mmp19         | 0 | 0 | 0 | 38   | 0.633333 | 0.165927 | 0.667595 | Unclassified | chr10:128226008-128237880 | 9.873   |
| Aspg          | 0 | 0 | 0 | 44   | 0.733333 | 0.042221 | 1.688854 | Unclassified | chr12:113342893-113365784 | 20.892  |
| Arhgef9       | 0 | 0 | 0 | 80   | 1.333333 | 0.29407  | 24.56787 | Stalled      | chrX:92244282-92363825    | 117.544 |
| Pctp          | 0 | 0 | 0 | 104  | 1.733333 | 4.18685  | 14.17634 | Stalled      | chr11:89844730-89866208   | 19.479  |
| Gnai1         | 0 | 0 | 0 | 60   | 1        | 0.12443  | 0.619123 | Unclassified | chr5:17770952-17868231    | 95.28   |
| Cdk16         | 0 | 0 | 0 | 443  | 7.383333 | 13.1011  | 10.1674  | Unclassified | chrX:20263618-20277003    | 11.386  |
| Gna11         | 0 | 0 | 0 | 402  | 6.7      | 5.20555  | 5.763489 | Unclassified | chr10:80991476-81009791   | 16.316  |
| Furin         | 0 | 0 | 0 | 233  | 3.883333 | 4.38482  | 0.453466 | Unclassified | chr7:87534079-87552317    | 16.239  |
| Pcdh24        | 0 | 0 | 0 | 82   | 1.366667 | 0.183535 | 1.656977 | Unclassified | chr13:54800823-54838022   | 35.2    |
| BC054059      | 0 | 0 | 0 | 27   | 0.45     | 0.060837 | 0.9369   | Unclassified | chr2:158326347-158333934  | 5.588   |
| Cd300lf       | 0 | 0 | 0 | 216  | 3.6      | 1.98335  | 5.500361 | Unclassified | chr11:114977528-114997306 | 17.779  |
| Rab3gap1      | 0 | 0 | 0 | 758  | 12.63333 | 10.302   | 36.84374 | Unclassified | chr1:129763349-129840453  | 75.105  |
| Cda           | 0 | 0 | 0 | 57   | 0.95     | 0.237633 | 2.570135 | Unclassified | chr4:137894442-137925870  | 29.429  |
| Gpm6a         | 0 | 0 | 0 | 64   | 1.066667 | 0.402435 | 0.625062 | Unclassified | chr8:56038195-56146222    | 106.028 |
| Sall1         | 0 | 0 | 0 | 33   | 0.55     | 0.036576 | 0.33222  | Unclassified | chr8:91551142-91570061    | 16.92   |
| Lrrc49        | 0 | 0 | 0 | 219  | 3.65     | 1.86056  | 7.477906 | Unclassified | chr9:60435045-60537941    | 100.897 |
| Cyp2b13       | 0 | 0 | 0 | 10   | 0.166667 | 0.003408 | 0.808167 | Unclassified | chr7:26844513-26881215    | 34.703  |
| Cyp2b10       | 0 | 0 | 0 | 24   | 0.4      | 0.013693 | 1.119331 | Unclassified | chr7:26680682-26711643    | 28.962  |
| Vwde          | 0 | 0 | 0 | 15   | 0.25     | 0.022547 | 1.554268 | Unclassified | chr6:13135609-13176965    | 39.357  |
| Cyp2a5        | 0 | 0 | 0 | 3    | 0.05     | 0.011201 | 0        | Unclassified | chr7:27618357-27628283    | 7.927   |
| Cyp2a4        | 0 | 0 | 0 | 2    | 0.033333 | 0.018674 | 0        | Unclassified | chr7:27090210-27100107    | 7.898   |
| Gnat2         | 0 | 0 | 0 | 30   | 0.5      | 0.554904 | 0.231237 | Unclassified | chr3:107893985-107904203  | 8.219   |
| Cyp26a1       | 0 | 0 | 0 | 16   | 0.266667 | 0.395788 | 1.250859 | Unclassified | chr19:37770297-37776026   | 3.73    |
| Tmem39b       | 0 | 0 | 0 | 299  | 4.983333 | 8.37487  | 14.35278 | Unclassified | chr4:129353598-129376082  | 20.485  |
| Pla2g1b       | 0 | 0 | 0 | 34   | 0.566667 | 2.27472  | 0.184238 | Unclassified | chr5:115914274-115924726  | 8.453   |
| Pla2r1        | 0 | 0 | 0 | 148  | 2.466667 | 0.220931 | 3.438368 | Unclassified | chr2:60257095-60393318    | 134.224 |
| Ybx1          | 0 | 0 | 0 | 1147 | 19.11667 | 214.139  | 10.0955  | Unclassified | chr4:118949931-118969118  | 17.188  |
| Gm5640        | 0 | 0 | 0 | 0    | 0        | 0        | 0        | Unclassified | chrX:71884457-71892974    | 6.518   |
| Phtf2         | 0 | 0 | 0 | 1047 | 17.45    | 4.42492  | 33.49413 | Unclassified | chr5:20264481-20389942    | 123.462 |
| Pkp1          | 0 | 0 | 0 | 86   | 1.433333 | 0.054282 | 1.087553 | Unclassified | chr1:137767971-137817601  | 47.631  |
| Pklr          | 0 | 0 | 0 | 22   | 0.366667 | 0.079464 | 0.310435 | Unclassified | chr3:88938063-88950516    | 10.454  |
| Pknox1        | 0 | 0 | 0 | 648  | 10.8     | 3.46186  | 24.89233 | Unclassified | chr17:31699717-31744637   | 42.921  |
| Pri3b1        | 0 | 0 | 0 | 0    | 0        | 0.027385 | 0        | Unclassified | chr13:27332298-27341609   | 7.312   |
| Lypla1        | 0 | 0 | 0 | 408  | 6.8      | 7.1936   | 40.89436 | Stalled      | chr1:4795973-4836816      | 38.844  |
| Scx           | 0 | 0 | 0 | 98   | 1.633333 | 0        | 1.473146 | Unclassified | chr15:76285867-76289890   | 2.024   |
| Star          | 0 | 0 | 0 | 214  | 3.566667 | 0.410913 | 0.439351 | Unclassified | chr8:26916984-26926454    | 7.471   |
| Abhd5         | 0 | 0 | 0 | 165  | 2.75     | 1.24558  | 47.69991 | Stalled      | chr9:122258733-122290641  | 29.909  |
| Zdhhc4        | 0 | 0 | 0 | 516  | 8.6      | 7.65794  | 12.18861 | Unclassified | chr5:144078169-144092905  | 12.737  |
| Sct           | 0 | 0 | 0 | 6    | 0.1      | 0.480296 | 6        | Unclassified | chr7:148464236-148467030  | 0.795   |
| Zc3h7b        | 0 | 0 | 0 | 781  | 13.01667 | 12.1905  | 5.060412 | Unclassified | chr15:81573277-81626699   | 51.423  |
| Scp2          | 0 | 0 | 0 | 513  | 8.55     | 9.66083  | 17.16872 | Unclassified | chr4:107716443-107793104  | 74.662  |
| Msx3          | 0 | 0 | 0 | 14   | 0.233333 | 0.515567 | 1.70566  | Unclassified | chr7:147232055-147236987  | 2.933   |
| Agap1         | 0 | 0 | 0 | 567  | 9.45     | 0.152349 | 0.875032 | Unclassified | chr1:91349385-91791857    | 440.473 |



|                      |   |   |   |      |          |          |          |              |                           |         |
|----------------------|---|---|---|------|----------|----------|----------|--------------|---------------------------|---------|
| <b>AI747448</b>      | 0 | 0 | 0 | 7    | 0.116667 | 0.016843 | 1.609528 | Unclassified | chr3:144573884-144597493  | 21.61   |
| <b>Susd4</b>         | 0 | 0 | 0 | 154  | 2.566667 | 0.081873 | 1.386465 | Unclassified | chr1:184693036-184825785  | 130.75  |
| <b>Fcho2</b>         | 0 | 0 | 0 | 478  | 7.966667 | 0.99638  | 24.40323 | Stalled      | chr13:99493361-99587404   | 92.044  |
| <b>Rnaset2a</b>      | 0 | 0 | 0 | 111  | 1.85     | 56.2249  | 12.59973 | Stalled      | chr17:8321462-8342653     | 19.192  |
| <b>Tmem85</b>        | 0 | 0 | 0 | 283  | 4.716667 | 23.9336  | 10.13201 | Unclassified | chr2:112203175-112210184  | 5.01    |
| <b>II20</b>          | 0 | 0 | 0 | 5    | 0.083333 | 0        | 1.216608 | Unclassified | chr1:132803768-132809873  | 4.106   |
| <b>Lim2</b>          | 0 | 0 | 0 | 12   | 0.2      | 0        | 0.898274 | Unclassified | chr7:50683470-50691361    | 5.892   |
| <b>Siglec5</b>       | 0 | 0 | 0 | 13   | 0.216667 | 0.17338  | 0.414074 | Unclassified | chr7:50604774-50614840    | 8.067   |
| <b>8430426H19Rik</b> | 0 | 0 | 0 | 119  | 1.983333 | 2.44021  | 21.24223 | Stalled      | chr13:62554376-62570172   | 13.797  |
| <b>Armc7</b>         | 0 | 0 | 0 | 504  | 8.4      | 6.60132  | 7.368466 | Unclassified | chr11:115334990-115351780 | 14.791  |
| <b>Kprp</b>          | 0 | 0 | 0 | 3    | 0.05     | 0        | 0        | Unclassified | chr3:92626995-92633169    | 4.175   |
| <b>Cyp2c55</b>       | 0 | 0 | 0 | 18   | 0.3      | 0.051549 | 0        | Unclassified | chr19:39079508-39117177   | 35.67   |
| <b>Pigx</b>          | 0 | 0 | 0 | 191  | 3.183333 | 13.0594  | 22.61558 | Stalled      | chr16:32084501-32101813   | 15.313  |
| <b>Osgepl1</b>       | 0 | 0 | 0 | 106  | 1.766667 | 4.6777   | 20.45112 | Stalled      | chr1:53368506-53380908    | 10.403  |
| <b>4921530L21Rik</b> | 0 | 0 | 0 | 1    | 0.016667 | 0.044347 | 0        | Unclassified | chr14:96278484-96281994   | 1.511   |
| <b>Ush1c</b>         | 0 | 0 | 0 | 75   | 1.25     | 0.012545 | 1.117393 | Unclassified | chr7:53450720-53495860    | 43.141  |
| <b>Ppil1</b>         | 0 | 0 | 0 | 735  | 12.25    | 89.4416  | 5.165233 | Unclassified | chr17:29387779-29402916   | 13.138  |
| <b>Nexn</b>          | 0 | 0 | 0 | 463  | 7.716667 | 0.06502  | 0.057907 | Unclassified | chr3:151899949-151931284  | 29.336  |
| <b>2010011I20Rik</b> | 0 | 0 | 0 | 185  | 3.083333 | 2.568    | 2.565744 | Elongating   | chr2:172169076-172181249  | 10.174  |
| <b>Dock5</b>         | 0 | 0 | 0 | 219  | 3.65     | 0.176093 | 3.25366  | Unclassified | chr14:68369984-68553629   | 181.646 |
| <b>Rad51ap1</b>      | 0 | 0 | 0 | 600  | 10       | 10.8937  | 17.29972 | Unclassified | chr6:126873436-126891573  | 16.138  |
| <b>Pld5</b>          | 0 | 0 | 0 | 207  | 3.45     | 0.061013 | 1.817494 | Unclassified | chr1:177892436-178207443  | 313.008 |
| <b>Gm7334</b>        | 0 | 0 | 0 | 436  | 7.266667 | 0        | 14.10337 | Unclassified | chr16:78360107-78379002   | 16.896  |
| <b>Hsd17b10</b>      | 0 | 0 | 0 | 100  | 1.666667 | 29.131   | 8.406104 | Unclassified | chrX:148434438-148438985  | 2.548   |
| <b>Hal</b>           | 0 | 0 | 0 | 50   | 0.833333 | 0.055764 | 1.587419 | Unclassified | chr10:92949512-92979488   | 27.977  |
| <b>4930529M08Rik</b> | 0 | 0 | 0 | 121  | 2.016667 | 0.131365 | 37.21159 | Stalled      | chr2:145758519-145789962  | 29.444  |
| <b>Cyp2t4</b>        | 0 | 0 | 0 | 323  | 5.383333 | 0.356009 | 0.084832 | Unclassified | chr7:27936732-27943583    | 4.852   |
| <b>Ttc35</b>         | 0 | 0 | 0 | 212  | 3.533333 | 9.45259  | 33.23379 | Stalled      | chr15:43306774-43359323   | 50.55   |
| <b>Cknj13</b>        | 0 | 0 | 0 | 36   | 0.6      | 0        | 1.184056 | Unclassified | chr1:89282858-89293304    | 8.447   |
| <b>4933434E20Rik</b> | 0 | 0 | 0 | 489  | 8.15     | 14.4634  | 21.92658 | Unclassified | chr3:89854738-89866369    | 9.632   |
| <b>Fate1</b>         | 0 | 0 | 0 | 6    | 0.1      | 0        | 0        | Unclassified | chrX:69216324-69234385    | 16.062  |
| <b>Slc26a6</b>       | 0 | 0 | 0 | 291  | 4.85     | 3.86932  | 105.5162 | Stalled      | chr9:108754373-108815380  | 59.008  |
| <b>Olfr807</b>       | 0 | 0 | 0 | 0    | 0        | 0        | 0        | Unclassified | chr10:129191568-129194504 | 0.937   |
| <b>Olfr808</b>       | 0 | 0 | 0 | 1    | 0.016667 | 0        | 0        | Unclassified | chr10:129202553-129205492 | 0.94    |
| <b>Olfr796</b>       | 0 | 0 | 0 | 2    | 0.033333 | 0        | 1        | Unclassified | chr10:129044602-129047535 | 0.934   |
| <b>Olfr791</b>       | 0 | 0 | 0 | 1    | 0.016667 | 0        | 1        | Unclassified | chr10:128961284-128964223 | 0.94    |
| <b>Nin</b>           | 0 | 0 | 0 | 980  | 16.33333 | 6.28216  | 22.40467 | Unclassified | chr12:71112421-71214912   | 100.492 |
| <b>Olfr167</b>       | 0 | 0 | 0 | 1    | 0.016667 | 0        | 0        | Unclassified | chr16:19514788-19517727   | 0.94    |
| <b>Olfr1417</b>      | 0 | 0 | 0 | 1    | 0.016667 | 0.087731 | 1        | Unclassified | chr19:11902566-11905514   | 0.949   |
| <b>Nkx2-3</b>        | 0 | 0 | 0 | 18   | 0.3      | 1.17726  | 2.346476 | Unclassified | chr19:43684814-43690382   | 3.569   |
| <b>Stoml3</b>        | 0 | 0 | 0 | 27   | 0.45     | 0        | 0.853348 | Unclassified | chr3:53290714-53311574    | 18.861  |
| <b>Ndufb6</b>        | 0 | 0 | 0 | 292  | 4.866667 | 74.0203  | 25.83912 | Stalled      | chr4:40217695-40228401    | 8.707   |
| <b>Cdx1</b>          | 0 | 0 | 0 | 32   | 0.533333 | 0.095058 | 0.352583 | Unclassified | chr18:61178516-61197853   | 17.338  |
| <b>Cdx2</b>          | 0 | 0 | 0 | 16   | 0.266667 | 0.197174 | 2.00397  | Unclassified | chr5:148112475-148120825  | 6.351   |
| <b>Cdx4</b>          | 0 | 0 | 0 | 4    | 0.066667 | 0.056247 | 0.722941 | Unclassified | chrX:100514736-100525563  | 8.828   |
| <b>Tram1</b>         | 0 | 0 | 0 | 1247 | 20.78333 | 18.2366  | 6.924628 | Unclassified | chr1:13554782-13581945    | 25.164  |
| <b>Stfa2l1</b>       | 0 | 0 | 0 | 1    | 0.016667 | 0        | 0        | Unclassified | chr16:36154896-36162034   | 5.139   |
| <b>Fbxo45</b>        | 0 | 0 | 0 | 445  | 7.416667 | 5.99225  | 23.42143 | Unclassified | chr16:32230197-32249111   | 16.915  |
| <b>Sprn</b>          | 0 | 0 | 0 | 28   | 0.466667 | 0.077158 | 0.48464  | Unclassified | chr7:147336526-147342558  | 4.033   |
| <b>Snrnp48</b>       | 0 | 0 | 0 | 524  | 8.733333 | 10.8801  | 14.54118 | Unclassified | chr13:38294807-38319532   | 22.726  |
| <b>Rnl3</b>          | 0 | 0 | 0 | 395  | 6.583333 | 3.61714  | 81.19192 | Stalled      | chr19:33212236-33468785   | 254.55  |
| <b>Cyp3a16</b>       | 0 | 0 | 0 | 13   | 0.216667 | 0.025272 | 0        | Unclassified | chr5:146197177-146232592  | 33.416  |
| <b>Tgm6</b>          | 0 | 0 | 0 | 38   | 0.633333 | 0.05808  | 1.404804 | Unclassified | chr2:129947020-129979961  | 30.942  |
| <b>Rab39b</b>        | 0 | 0 | 0 | 27   | 0.45     | 0.903471 | 12.63623 | Stalled      | chrX:72817396-72825543    | 6.148   |
| <b>Col1a1</b>        | 0 | 0 | 0 | 37   | 0.616667 | 0.122686 | 0.613096 | Unclassified | chr11:94795583-94813170   | 15.588  |
| <b>Krt6b</b>         | 0 | 0 | 0 | 4    | 0.066667 | 0.024082 | 0.620349 | Unclassified | chr15:101506453-101512720 | 4.268   |
| <b>Col9a3</b>        | 0 | 0 | 0 | 167  | 2.783333 | 0.450203 | 6.588648 | Unclassified | chr2:180330926-180356890  | 23.965  |
| <b>Comt1</b>         | 0 | 0 | 0 | 526  | 8.766667 | 13.0925  | 10.35926 | Unclassified | chr16:18406974-18428809   | 19.836  |
| <b>Copa</b>          | 0 | 0 | 0 | 710  | 11.83333 | 33.8247  | 21.04158 | Unclassified | chr1:174010659-174052463  | 39.805  |
| <b>Comp</b>          | 0 | 0 | 0 | 58   | 0.966667 | 0.559988 | 0.126344 | Unclassified | chr8:72895446-72905965    | 8.52    |
| <b>Slc6a17</b>       | 0 | 0 | 0 | 73   | 1.216667 | 0.062985 | 1.684555 | Unclassified | chr3:107270465-107322936  | 50.472  |
| <b>Spopl</b>         | 0 | 0 | 0 | 394  | 6.566667 | 2.27852  | 28.68947 | Stalled      | chr2:23365573-23429624    | 62.052  |
| <b>Slc7a2</b>        | 0 | 0 | 0 | 66   | 1.1      | 0.220222 | 0.972702 | Unclassified | chr8:41945720-42007424    | 59.705  |
| <b>Klhl38</b>        | 0 | 0 | 0 | 14   | 0.233333 | 0.011588 | 0.417419 | Unclassified | chr15:58146127-58157724   | 9.598   |
| <b>H2-M1</b>         | 0 | 0 | 0 | 1    | 0.016667 | 0        | 0        | Unclassified | chr17:36806952-36811142   | 2.191   |
| <b>H2-M11</b>        | 0 | 0 | 0 | 2    | 0.033333 | 0        | 0.541074 | Unclassified | chr17:36682019-36686197   | 2.179   |
| <b>Rad51</b>         | 0 | 0 | 0 | 531  | 8.85     | 15.1994  | 24.2777  | Unclassified | chr2:118936552-118961806  | 23.255  |
| <b>H2-M10.4</b>      | 0 | 0 | 0 | 7    | 0.116667 | 0        | 2.692663 | Unclassified | chr17:36597108-36601274   | 2.167   |
| <b>Psmg2</b>         | 0 | 0 | 0 | 568  | 9.466667 | 16.2255  | 25.82884 | Unclassified | chr18:67799252-67813816   | 12.565  |
| <b>Grin3a</b>        | 0 | 0 | 0 | 162  | 2.7      | 0.034453 | 1.597617 | Unclassified | chr4:49678097-49859953    | 179.857 |
| <b>Pyy</b>           | 0 | 0 | 0 | 4    | 0.066667 | 0.180149 | 2        | Unclassified | chr11:101967990-101971090 | 1.101   |
| <b>Nags</b>          | 0 | 0 | 0 | 11   | 0.183333 | 0.439376 | 0.650321 | Unclassified | chr11:102004900-102010790 | 3.891   |
| <b>Asb16</b>         | 0 | 0 | 0 | 26   | 0.433333 | 0.338758 | 0.583569 | Unclassified | chr11:102128136-102139375 | 9.24    |
| <b>BC030867</b>      | 0 | 0 | 0 | 333  | 5.55     | 7.98619  | 6.624874 | Unclassified | chr11:102108195-102126497 | 16.303  |
| <b>Liph</b>          | 0 | 0 | 0 | 423  | 7.05     | 25.3921  | 5.980175 | Unclassified | chr10:119662115-119669126 | 5.012   |
| <b>Atxn713</b>       | 0 | 0 | 0 | 905  | 15.08333 | 19.5212  | 3.461876 | Unclassified | chr11:102150613-102159943 | 7.331   |
| <b>Trappc2</b>       | 0 | 0 | 0 | 284  | 4.733333 | 0.574521 | 40.16349 | Stalled      | chrX:162876756-162890475  | 11.72   |
| <b>Zdhhc12</b>       | 0 | 0 | 0 | 412  | 6.866667 | 12.407   | 7.402426 | Unclassified | chr2:29946463-29951155    | 2.693   |
| <b>Mrp135</b>        | 0 | 0 | 0 | 263  | 4.383333 | 7.15494  | 15.71215 | Unclassified | chr6:71762991-71775778    | 10.788  |
| <b>Serp1b1a</b>      | 0 | 0 | 0 | 47   | 0.783333 | 1.35847  | 6.871563 | Unclassified | chr13:32933960-32945054   | 9.095   |
| <b>Dcst1</b>         | 0 | 0 | 0 | 62   | 1.033333 | 0.958545 | 0.608904 | Unclassified | chr3:89154156-89171161    | 15.006  |
| <b>Ywhae</b>         | 0 | 0 | 0 | 1783 | 29.71667 | 167.898  | 10.46677 | Unclassified | chr11:75544388-75579341   | 32.954  |
| <b>Slc23a3</b>       | 0 | 0 | 0 | 52   | 0.866667 | 0.199282 | 7.248521 | Unclassified | chr1:75122115-75132464    | 8.35    |
| <b>Ywhah</b>         | 0 | 0 | 0 | 511  | 8.516667 | 67.4556  | 18.00451 | Unclassified | chr5:33359464-33370615    | 9.152   |
| <b>A1cf</b>          | 0 | 0 | 0 | 80   | 1.333333 | 0.033481 | 0.502039 | Unclassified | chr19:31941250-32023896   | 80.647  |
| <b>Pdzd4</b>         | 0 | 0 | 0 | 251  | 4.183333 | 1.09804  | 1.741979 | Unclassified | chrX:71038695-71072308    | 31.614  |

|                      |   |   |   |      |           |          |          |              |                           |         |
|----------------------|---|---|---|------|-----------|----------|----------|--------------|---------------------------|---------|
| <b>Pnma3</b>         | 0 | 0 | 0 | 2    | 0.033333  | 0.013152 | 0        | Unclassified | chrX:70308125-70313530    | 3.406   |
| <b>Krt2</b>          | 0 | 0 | 0 | 12   | 0.2       | 0.088287 | 0        | Unclassified | chr15:101641119-101650600 | 7.482   |
| <b>D4Bwg0951e</b>    | 0 | 0 | 0 | 23   | 0.383333  | 0.165746 | 2.041794 | Unclassified | chr4:80554589-80600205    | 43.617  |
| <b>Rhov</b>          | 0 | 0 | 0 | 11   | 0.183333  | 1.0762   | 3.049587 | Unclassified | chr2:119094938-119098962  | 2.025   |
| <b>Yap1</b>          | 0 | 0 | 0 | 76   | 1.266667  | 0.165151 | 3.055372 | Unclassified | chr9:7932002-8006596      | 72.595  |
| <b>Zbtb8a</b>        | 0 | 0 | 0 | 151  | 2.516667  | 2.11545  | 4.485882 | Unclassified | chr4:129030875-129057272  | 24.398  |
| <b>Rufy3</b>         | 0 | 0 | 0 | 193  | 3.216667  | 1.07992  | 0.948483 | Unclassified | chr5:89010598-89071721    | 59.124  |
| <b>Teddm1</b>        | 0 | 0 | 0 | 6    | 0.1       | 0.049784 | 2        | Unclassified | chr1:155736775-155740190  | 1.416   |
| <b>Tmem47</b>        | 0 | 0 | 0 | 5    | 0.083333  | 0.050236 | 1.858322 | Unclassified | chrX:78313982-78343214    | 27.233  |
| <b>Dennd2a</b>       | 0 | 0 | 0 | 173  | 2.883333  | 0.402881 | 0.725322 | Unclassified | chr6:39412376-39509833    | 95.458  |
| <b>5830403L16Rik</b> | 0 | 0 | 0 | 1    | 0.016667  | 0.085236 | 0        | Unclassified | chr1:155696671-155700325  | 1.655   |
| <b>Pax2</b>          | 0 | 0 | 0 | 103  | 1.716667  | 0.153388 | 0.884049 | Unclassified | chr19:44829883-44910517   | 78.635  |
| <b>Gpr139</b>        | 0 | 0 | 0 | 37   | 0.616667  | 0        | 0        | Unclassified | chr7:126287836-126329888  | 40.053  |
| <b>Cxcl10</b>        | 0 | 0 | 0 | 81   | 1.35      | 1.32624  | 4.072626 | Unclassified | chr5:92775666-92779880    | 2.215   |
| <b>Cpne7</b>         | 0 | 0 | 0 | 45   | 0.75      | 0.324923 | 1.377748 | Unclassified | chr8:125639273-125659085  | 17.813  |
| <b>Eif2c4</b>        | 0 | 0 | 0 | 95   | 1.583333  | 0.673743 | 8.668503 | Unclassified | chr4:126166788-126212702  | 43.915  |
| <b>Gm11818</b>       | 0 | 0 | 0 | 27   | 0.45      | 0.236528 | 0.738995 | Unclassified | chr4:12832004-12908618    | 74.615  |
| <b>Defb36</b>        | 0 | 0 | 0 | 8    | 0.133333  | 0        | 0.512365 | Unclassified | chr2:152428108-152438462  | 8.355   |
| <b>Gm136</b>         | 0 | 0 | 0 | 10   | 0.166667  | 0.029508 | 0.589175 | Unclassified | chr4:34691036-34705508    | 12.473  |
| <b>Zcchc6</b>        | 0 | 0 | 0 | 909  | 15.15     | 7.06725  | 22.16868 | Unclassified | chr13:59873239-59926508   | 51.27   |
| <b>Gm52</b>          | 0 | 0 | 0 | 4    | 0.066667  | 0.179733 | 0.598949 | Unclassified | chr5:135034109-135037963  | 1.855   |
| <b>AI182371</b>      | 0 | 0 | 0 | 8    | 0.133333  | 0        | 1.51494  | Unclassified | chr2:34939565-34958180    | 16.616  |
| <b>1700013F07Rik</b> | 0 | 0 | 0 | 13   | 0.216667  | 0.411335 | 2.018985 | Unclassified | chr3:108338501-108347615  | 7.115   |
| <b>Egf</b>           | 0 | 0 | 0 | 358  | 5.966667  | 0.840292 | 0.534527 | Unclassified | chr3:129380492-129460240  | 77.749  |
| <b>Cdk3</b>          | 0 | 0 | 0 | 66   | 1.1       | 0.296383 | 4.374673 | Unclassified | chr11:116075315-116081601 | 4.287   |
| <b>Efnb3</b>         | 0 | 0 | 0 | 97   | 1.616667  | 0.502112 | 7.861792 | Unclassified | chr11:69367594-69375739   | 6.146   |
| <b>Efnb2</b>         | 0 | 0 | 0 | 253  | 4.216667  | 0.225442 | 21.83469 | Stalled      | chr8:8617438-8662773      | 43.336  |
| <b>Efnb1</b>         | 0 | 0 | 0 | 71   | 1.183333  | 1.88014  | 28.33638 | Stalled      | chrX:96329468-96344330    | 12.863  |
| <b>Efna5</b>         | 0 | 0 | 0 | 270  | 4.5       | 0.156884 | 3.633368 | Unclassified | chr17:62952305-63232666   | 278.362 |
| <b>Mpped2</b>        | 0 | 0 | 0 | 130  | 2.166667  | 0.101105 | 0.576023 | Unclassified | chr2:106531615-106708517  | 174.903 |
| <b>Gpkow</b>         | 0 | 0 | 0 | 206  | 3.433333  | 7.69639  | 9.752766 | Unclassified | chrX:7272259-7287385      | 13.127  |
| <b>5730590G19Rik</b> | 0 | 0 | 0 | 777  | 12.95     | 6.43413  | 10.88329 | Unclassified | chr7:86803081-86843031    | 37.951  |
| <b>Egfr</b>          | 0 | 0 | 0 | 170  | 2.833333  | 0.256992 | 1.512736 | Unclassified | chr11:16650205-16813910   | 161.706 |
| <b>Cd80</b>          | 0 | 0 | 0 | 430  | 7.166667  | 4.80507  | 1.592147 | Elongating   | chr16:38457012-38487014   | 28.003  |
| <b>Catsper4</b>      | 0 | 0 | 0 | 26   | 0.433333  | 0.016998 | 0.770612 | Unclassified | chr4:133767882-133785298  | 15.417  |
| <b>Cacng3</b>        | 0 | 0 | 0 | 130  | 2.166667  | 0.050491 | 0.876043 | Unclassified | chr7:129813257-129912905  | 97.649  |
| <b>Slc6a5</b>        | 0 | 0 | 0 | 82   | 1.366667  | 0.085476 | 0.763828 | Unclassified | chr7:57163668-57214863    | 49.196  |
| <b>Foxi2</b>         | 0 | 0 | 0 | 9    | 0.15      | 0.069251 | 0.857143 | Unclassified | chr7:142600049-142605298  | 3.25    |
| <b>Olfr1022</b>      | 0 | 0 | 0 | 0    | 0         | 0.054077 | 0        | Unclassified | chr2:85706750-85709696    | 0.947   |
| <b>Gnmt</b>          | 0 | 0 | 0 | 57   | 0.95      | 0.39706  | 2.09319  | Unclassified | chr17:46862612-46868114   | 3.503   |
| <b>Olfr452</b>       | 0 | 0 | 0 | 2    | 0.033333  | 0.080574 | 0        | Unclassified | chr6:42738039-42740993    | 0.955   |
| <b>Olfr1264</b>      | 0 | 0 | 0 | 1    | 0.016667  | 0        | 1        | Unclassified | chr2:89861294-89864221    | 0.928   |
| <b>Olfr1178</b>      | 0 | 0 | 0 | 1    | 0.016667  | 0        | 0        | Unclassified | chr2:88229405-88232377    | 0.973   |
| <b>Olfr538</b>       | 0 | 0 | 0 | 1    | 0.016667  | 0.023381 | 1        | Unclassified | chr7:147758053-147760986  | 0.934   |
| <b>Hgf</b>           | 0 | 0 | 0 | 37   | 0.616667  | 0.032564 | 0        | Unclassified | chr5:16057367-16125257    | 65.891  |
| <b>Gnrh1</b>         | 0 | 0 | 0 | 28   | 0.466667  | 1.25217  | 0.476372 | Unclassified | chr14:68361285-68367493   | 4.209   |
| <b>Slc40a1</b>       | 0 | 0 | 0 | 12   | 0.2       | 0.261635 | 0.623011 | Unclassified | chr1:45964914-45984439    | 17.526  |
| <b>Grin3b</b>        | 0 | 0 | 0 | 393  | 6.55      | 0.318742 | 0.557511 | Unclassified | chr10:79431468-79439935   | 6.468   |
| <b>Ppef2</b>         | 0 | 0 | 0 | 42   | 0.7       | 0.090176 | 1.594442 | Unclassified | chr5:92655999-92684185    | 26.187  |
| <b>Gnrhr</b>         | 0 | 0 | 0 | 15   | 0.25      | 0.031855 | 1.067231 | Unclassified | chr5:86611022-86628895    | 15.874  |
| <b>Gm11569</b>       | 0 | 0 | 0 | 1    | 0.016667  | 0.012133 | 1        | Unclassified | chr11:99664861-99667760   | 0.9     |
| <b>Foxb2</b>         | 0 | 0 | 0 | 8    | 0.133333  | 0.803664 | 0        | Unclassified | chr19:16946805-16950320   | 1.516   |
| <b>Mif1</b>          | 0 | 0 | 0 | 24   | 0.4       | 0.482335 | 1.741405 | Unclassified | chr3:67176018-67203922    | 25.905  |
| <b>Pitpnb</b>        | 0 | 0 | 0 | 1473 | 24.55     | 23.6468  | 18.93933 | Unclassified | chr5:111757782-111817379  | 57.598  |
| <b>Fam60a</b>        | 0 | 0 | 0 | 764  | 12.733333 | 2.36366  | 4.053022 | Unclassified | chr6:148869580-148896954  | 25.375  |
| <b>Mitf</b>          | 0 | 0 | 0 | 228  | 3.8       | 0.742956 | 7.52296  | Unclassified | chr6:97755051-97971352    | 214.302 |
| <b>Pate4</b>         | 0 | 0 | 0 | 6    | 0.1       | 0.088302 | 0.431431 | Unclassified | chr9:35414677-35421470    | 4.794   |
| <b>Ptpn11</b>        | 0 | 0 | 0 | 898  | 14.96667  | 14.5165  | 17.90561 | Unclassified | chr5:121580541-121643406  | 60.866  |
| <b>Bhlha15</b>       | 0 | 0 | 0 | 219  | 3.65      | 9.70847  | 3.250341 | Unclassified | chr5:144949154-144955310  | 4.157   |
| <b>Dscam</b>         | 0 | 0 | 0 | 507  | 8.45      | 0.034268 | 0.533555 | Unclassified | chr16:96813686-97394342   | 578.657 |
| <b>Klk15</b>         | 0 | 0 | 0 | 10   | 0.166667  | 0        | 0        | Unclassified | chr7:51187140-51194960    | 5.821   |
| <b>Dsc1</b>          | 0 | 0 | 0 | 21   | 0.35      | 0.02037  | 0        | Unclassified | chr18:20243203-20275274   | 30.072  |
| <b>Dsc2</b>          | 0 | 0 | 0 | 20   | 0.333333  | 0.014511 | 0.619763 | Unclassified | chr18:20189298-20220006   | 28.709  |
| <b>Dsc3</b>          | 0 | 0 | 0 | 19   | 0.316667  | 0.055566 | 0.715145 | Unclassified | chr18:20119430-20162598   | 41.169  |
| <b>Ly6h</b>          | 0 | 0 | 0 | 5    | 0.083333  | 0        | 0.324172 | Unclassified | chr15:75395174-75399612   | 2.439   |
| <b>Pth1r</b>         | 0 | 0 | 0 | 91   | 1.516667  | 0.325409 | 0.212821 | Unclassified | chr9:110624588-110651649  | 25.062  |
| <b>Synpo</b>         | 0 | 0 | 0 | 158  | 2.633333  | 0.928166 | 1.150866 | Unclassified | chr18:60753643-60785959   | 30.317  |
| <b>Leprot</b>        | 0 | 0 | 0 | 256  | 4.266667  | 9.69481  | 18.98309 | Stalled      | chr4:10131837-101331963   | 11.577  |
| <b>Tat</b>           | 0 | 0 | 0 | 10   | 0.166667  | 0.027234 | 1.08771  | Unclassified | chr8:112512356-112523701  | 9.346   |
| <b>Rdh8</b>          | 0 | 0 | 0 | 11   | 0.183333  | 0        | 0.908669 | Unclassified | chr9:20620947-20630607    | 7.661   |
| <b>Mapk7</b>         | 0 | 0 | 0 | 265  | 4.416667  | 8.62647  | 6.914555 | Unclassified | chr11:61302313-61309705   | 5.393   |
| <b>Pla2g7</b>        | 0 | 0 | 0 | 53   | 0.883333  | 1.16097  | 4.539928 | Unclassified | chr17:43703399-43749150   | 43.752  |
| <b>Tceb3</b>         | 0 | 0 | 0 | 718  | 11.96667  | 21.3947  | 9.313951 | Unclassified | chr4:135559284-135579564  | 18.281  |
| <b>Cacng6</b>        | 0 | 0 | 0 | 29   | 0.483333  | 0.261892 | 1.263741 | Unclassified | chr7:3423422-3435658      | 10.237  |
| <b>Cartpt</b>        | 0 | 0 | 0 | 7    | 0.116667  | 0.168838 | 0.545661 | Unclassified | chr13:100668438-100672638 | 2.201   |
| <b>Gpr20</b>         | 0 | 0 | 0 | 34   | 0.566667  | 0.059861 | 1.883905 | Unclassified | chr15:73525036-73539935   | 12.9    |
| <b>Sc4mol</b>        | 0 | 0 | 0 | 726  | 12.1      | 39.3773  | 8.468049 | Unclassified | chr8:67196941-67214375    | 15.435  |
| <b>Serpnb9f</b>      | 0 | 0 | 0 | 1    | 0.016667  | 0.024868 | 0        | Unclassified | chr13:33413945-33427235   | 11.291  |
| <b>Zfp707</b>        | 0 | 0 | 0 | 219  | 3.65      | 15.2998  | 21.49094 | Stalled      | chr15:75797614-75806295   | 6.682   |
| <b>Serpina1a</b>     | 0 | 0 | 0 | 3    | 0.05      | 0        | 0        | Unclassified | chr12:105091668-105103829 | 10.162  |
| <b>Serpina1b</b>     | 0 | 0 | 0 | 3    | 0.05      | 0.005549 | 0        | Unclassified | chr12:104966365-104978399 | 10.035  |
| <b>Serpina1c</b>     | 0 | 0 | 0 | 2    | 0.033333  | 0        | 0.900259 | Unclassified | chr12:105133135-105145160 | 10.026  |
| <b>Serpina1d</b>     | 0 | 0 | 0 | 4    | 0.066667  | 0.034753 | 0        | Unclassified | chr12:105001796-105013843 | 10.048  |
| <b>Serpina1e</b>     | 0 | 0 | 0 | 6    | 0.1       | 0.013174 | 0        | Unclassified | chr12:105185141-105197107 | 9.967   |
| <b>Plk4</b>          | 0 | 0 | 0 | 537  | 8.95      | 8.0157   | 14.92968 | Unclassified | chr3:40601872-40620805    | 16.934  |
| <b>Serpnb9b</b>      | 0 | 0 | 0 | 22   | 0.366667  | 0.152749 | 0.755677 | Unclassified | chr13:33117282-33132427   | 13.146  |

|               |   |          |   |      |           |          |          |              |                           |         |
|---------------|---|----------|---|------|-----------|----------|----------|--------------|---------------------------|---------|
| Serpnb9c      | 0 | 0        | 0 | 4    | 0.066667  | 0.030588 | 3        | Unclassified | chr13:33241143-33252220   | 9.078   |
| Slc5a3        | 0 | 0        | 0 | 686  | 11.433333 | 15.5054  | 26.10294 | Unclassified | chr16:92056566-92087718   | 29.153  |
| 1700125D06Rik | 0 | 0        | 0 | 19   | 0.316667  | 0.436398 | 12       | Unclassified | chr4:129166433-129169200  | 0.768   |
| Nphp1         | 0 | 0        | 0 | 133  | 2.216667  | 1.41458  | 15.8154  | Stalled      | chr2:127566467-127616590  | 48.124  |
| Efr3b         | 0 | 0        | 0 | 180  | 3         | 0.49527  | 6.458865 | Unclassified | chr12:3962553-4040915     | 76.363  |
| Cdkl2         | 0 | 0        | 0 | 85   | 1.416667  | 1.44627  | 23.30636 | Stalled      | chr5:92435100-92474044    | 36.945  |
| Rhbdd2        | 0 | 0        | 0 | 289  | 4.816667  | 2.35021  | 14.50486 | Unclassified | chr5:136106523-136122246  | 13.724  |
| Otos          | 0 | 0        | 0 | 30   | 0.5       | 0.14564  | 2.056738 | Unclassified | chr1:94540794-94547418    | 4.625   |
| Olfr69        | 0 | 0        | 0 | 4    | 0.066667  | 0.033    | 0.768465 | Unclassified | chr7:110915790-110922108  | 4.319   |
| Muc4          | 0 | 0        | 0 | 71   | 1.183333  | 0.060162 | 0        | Unclassified | chr16:32733971-32782476   | 46.506  |
| Leprel1       | 0 | 0        | 0 | 122  | 2.033333  | 0.131128 | 2.210072 | Unclassified | chr16:25960408-26107870   | 145.463 |
| Krt8          | 0 | 0        | 0 | 13   | 0.216667  | 0.028368 | 1.697179 | Unclassified | chr15:101827141-101836773 | 7.633   |
| Dmbx1         | 0 | 0        | 0 | 47   | 0.783333  | 0.051048 | 0.746258 | Unclassified | chr4:115587723-115614531  | 24.809  |
| LOC16697      | 0 | 0        | 0 | 1    | 0.016667  | 0.029162 | 0        | Unclassified | chr10:77167331-77169731   | 0.401   |
| Ttyh2         | 0 | 0        | 0 | 272  | 4.533333  | 0.915673 | 14.87668 | Stalled      | chr11:114534781-114582298 | 45.518  |
| Krtap12-1     | 0 | 0        | 0 | 3    | 0.05      | 0.082451 | 2        | Unclassified | chr10:77181330-77184001   | 0.672   |
| 2210010C04Rik | 0 | 0        | 0 | 5    | 0.083333  | 0.083767 | 0.585807 | Unclassified | chr6:40980266-40987508    | 5.243   |
| Krtap13       | 0 | 0        | 0 | 1    | 0.016667  | 0.077083 | 0        | Unclassified | chr16:88750989-88753873   | 0.885   |
| Chic2         | 0 | 0        | 0 | 509  | 8.483333  | 17.1252  | 20.79087 | Unclassified | chr5:75402448-75442651    | 38.204  |
| Tulp1         | 0 | 0        | 0 | 24   | 0.4       | 0.223215 | 1.160976 | Unclassified | chr17:28488463-28504088   | 13.626  |
| Olfr1100      | 0 | 0        | 0 | 0    | 0         | 0.05307  | 0        | Unclassified | chr2:86817985-86820951    | 0.967   |
| 5730455P16Rik | 0 | 0        | 0 | 316  | 5.266667  | 2.9531   | 18.89733 | Unclassified | chr11:80173994-80193517   | 17.524  |
| Sp8           | 0 | 0        | 0 | 12   | 0.2       | 0.142202 | 0.85705  | Unclassified | chr12:120082801-120091049 | 6.249   |
| B430306N03Rik | 0 | 0        | 0 | 64   | 1.066667  | 0.312788 | 1.704379 | Unclassified | chr17:48453486-48465836   | 10.351  |
| Catsperg2     | 0 | 0        | 0 | 19   | 0.316667  | 0.043637 | 0        | Unclassified | chr7:30482237-30514034    | 29.798  |
| Kcnj8         | 0 | 0        | 0 | 13   | 0.216667  | 0.02343  | 0        | Unclassified | chr6:142513458-142521876  | 6.419   |
| Hs3st6        | 0 | 0        | 0 | 10   | 0.166667  | 0.737524 | 2.696649 | Unclassified | chr17:24887947-24895629   | 5.683   |
| Ciptm1l       | 0 | 134.7152 | 0 | 971  | 16.183333 | 43.6798  | 9.342488 | Unclassified | chr13:73739748-73758053   | 16.306  |
| 1700054N08Rik | 0 | 0        | 0 | 234  | 3.9       | 5.36464  | 1.418158 | Unclassified | chr8:126364743-126386109  | 19.367  |
| Gabra2        | 0 | 0        | 0 | 70   | 1.166667  | 0.048222 | 1.359737 | Unclassified | chr5:71352295-71489088    | 134.794 |
| Xcl1          | 0 | 0        | 0 | 6    | 0.1       | 0.051061 | 0.417249 | Unclassified | chr1:166861778-166867641  | 3.864   |
| Gtsf1l        | 0 | 0        | 0 | 22   | 0.366667  | 0.050922 | 0.323634 | Unclassified | chr2:162912766-162917337  | 2.572   |
| Myo3a         | 0 | 0        | 0 | 114  | 1.9       | 0.029383 | 1.469287 | Unclassified | chr2:22160694-22473767    | 311.074 |
| Frmf3         | 0 | 0        | 0 | 68   | 1.133333  | 0.036883 | 3.678287 | Unclassified | chr4:73657506-73835832    | 176.327 |
| C9            | 0 | 0        | 0 | 39   | 0.65      | 0.058025 | 0.584946 | Unclassified | chr15:6393332-6448476     | 53.145  |
| Cd300lg       | 0 | 0        | 0 | 16   | 0.266667  | 0.054584 | 0.967095 | Unclassified | chr11:101900824-101916931 | 14.108  |
| Utp15         | 0 | 0        | 0 | 588  | 9.8       | 7.26474  | 19.90866 | Unclassified | chr13:99016799-99034947   | 16.149  |
| 4930503L19Rik | 0 | 0        | 0 | 344  | 5.733333  | 6.72237  | 19.5612  | Unclassified | chr18:70612793-70634134   | 19.342  |
| Ankrd32       | 0 | 0        | 0 | 434  | 7.233333  | 2.70527  | 32.93202 | Stalled      | chr13:77182348-77276729   | 92.382  |
| C5ar1         | 0 | 0        | 0 | 20   | 0.333333  | 0.250584 | 3.427052 | Unclassified | chr7:16832091-16846600    | 12.51   |
| Dnahc7b       | 0 | 0        | 0 | 100  | 1.666667  | 0.026963 | 0        | Unclassified | chr1:46121582-46430395    | 306.814 |
| C6            | 0 | 0        | 0 | 36   | 0.6       | 0.009022 | 0        | Unclassified | chr15:4675209-4754045     | 76.837  |
| Pclo          | 0 | 0        | 0 | 154  | 2.566667  | 0.047643 | 2.095556 | Unclassified | chr5:14512917-14863459    | 348.543 |
| Tas2r108      | 0 | 0        | 0 | 3    | 0.05      | 0        | 3        | Unclassified | chr6:40441590-40444484    | 0.895   |
| Kcnk9         | 0 | 0        | 0 | 44   | 0.733333  | 0.074205 | 0.453268 | Unclassified | chr15:72342548-72378709   | 34.162  |
| Fbln7         | 0 | 0        | 0 | 48   | 0.8       | 0.076010 | 0.822083 | Unclassified | chr2:128687667-128722770  | 33.104  |
| 2210415F13Rik | 0 | 0        | 0 | 13   | 0.216667  | 0.086016 | 1.53737  | Unclassified | chr11:58190533-58204043   | 11.511  |
| 17000200O3Rik | 0 | 0        | 0 | 689  | 11.483333 | 4.95715  | 31.40823 | Unclassified | chr12:87580827-87632318   | 49.492  |
| Psma5         | 0 | 0        | 0 | 614  | 10.233333 | 23.2034  | 16.05304 | Unclassified | chr3:108057843-108082870  | 23.028  |
| Pax4          | 0 | 0        | 0 | 7    | 0.116667  | 0.039015 | 0        | Unclassified | chr6:28392334-28401340    | 7.007   |
| Ccdc27        | 0 | 0        | 0 | 37   | 0.616667  | 0.055349 | 0.313001 | Unclassified | chr4:153400752-153418786  | 16.035  |
| H2-M2         | 0 | 0        | 0 | 2    | 0.033333  | 0.255783 | 1        | Unclassified | chr17:37617795-37622474   | 2.68    |
| H2-M9         | 0 | 0        | 0 | 3    | 0.05      | 0.062276 | 1        | Unclassified | chr17:36777369-36781589   | 2.221   |
| Pola1         | 0 | 0        | 0 | 1329 | 22.15     | 4.77982  | 31.04568 | Stalled      | chrX:90550105-90879494    | 327.39  |
| Brd1          | 0 | 0        | 0 | 1020 | 17        | 11.6571  | 8.564923 | Unclassified | chr15:88517464-88566649   | 47.186  |
| II7           | 0 | 0        | 0 | 34   | 0.566667  | 1.26811  | 4.93965  | Unclassified | chr3:7572076-7615427      | 41.352  |
| Rfx8          | 0 | 0        | 0 | 100  | 1.666667  | 0        | 0.716337 | Unclassified | chr1:39722147-39779834    | 55.688  |
| Asap2         | 0 | 0        | 0 | 650  | 10.833333 | 0.899566 | 10.029   | Stalled      | chr12:21115616-21276032   | 158.417 |
| Zcchc16       | 0 | 0        | 0 | 91   | 1.516667  | 0.021172 | 0.830933 | Unclassified | chrX:141121449-141556951  | 433.503 |
| Cspp1         | 0 | 0        | 0 | 1057 | 17.61667  | 3.46399  | 22.58858 | Unclassified | chr1:10026298-10126849    | 98.552  |
| Sycp2         | 0 | 0        | 0 | 38   | 0.633333  | 0.018029 | 1.993114 | Unclassified | chr2:178080000-178144363  | 62.364  |
| Gm12824       | 0 | 0        | 0 | 316  | 5.266667  | 0.168508 | 3.315523 | Unclassified | chr4:114077328-114287703  | 208.376 |
| Olfr402       | 0 | 0        | 0 | 1    | 0.016667  | 0        | 1        | Unclassified | chr11:73966657-73969605   | 0.949   |
| Trappc6a      | 0 | 0        | 0 | 475  | 7.916667  | 54.3771  | 12.18569 | Unclassified | chr7:20092077-20101494    | 7.418   |
| Cog6          | 0 | 0        | 0 | 282  | 4.7       | 6.03886  | 19.89696 | Stalled      | chr3:52786044-52823145    | 35.102  |
| Ano2          | 0 | 0        | 0 | 311  | 5.183333  | 0.044078 | 0        | Unclassified | chr6:125638436-125990144  | 349.709 |
| Gatm          | 0 | 0        | 0 | 108  | 1.8       | 9.36513  | 22.15207 | Stalled      | chr2:122420208-122439013  | 16.806  |
| Slc39a8       | 0 | 0        | 0 | 483  | 8.05      | 3.20663  | 21.89512 | Stalled      | chr3:135486454-135551534  | 63.081  |
| Rps10         | 0 | 0        | 0 | 1197 | 19.95     | 312.75   | 3.726723 | Unclassified | chr17:27767373-27774187   | 4.815   |
| Gpt2          | 0 | 0        | 0 | 154  | 2.566667  | 2.84146  | 9.151458 | Unclassified | chr8:88014515-88051457    | 34.943  |
| Edem2         | 0 | 0        | 0 | 516  | 8.6       | 29.3037  | 18.02585 | Unclassified | chr2:155527408-155557211  | 27.804  |
| Ccdc88a       | 0 | 0        | 0 | 262  | 4.366667  | 1.3005   | 49.59064 | Stalled      | chr11:29271774-29410811   | 137.038 |
| Zswim1        | 0 | 0        | 0 | 284  | 4.733333  | 6.29046  | 7.809148 | Unclassified | chr2:164646185-164652367  | 4.183   |
| Scand3        | 0 | 0        | 0 | 14   | 0.233333  | 8.54218  | 7.753061 | Unclassified | chr5:130369592-130379492  | 7.901   |
| Rbpm2         | 0 | 0        | 0 | 47   | 0.783333  | 0.566523 | 1.223801 | Unclassified | chr9:65476388-65508325    | 29.938  |
| Dnmbp         | 0 | 0        | 0 | 191  | 3.183333  | 0.784722 | 1.550612 | Unclassified | chr19:43922456-43988882   | 64.427  |
| Fhl1          | 0 | 0        | 0 | 32   | 0.533333  | 0.104689 | 0        | Unclassified | chrX:53982963-54046523    | 61.561  |
| Hp1bp3        | 0 | 0        | 0 | 971  | 16.183333 | 21.984   | 10.57957 | Unclassified | chr4:137770541-137799085  | 26.545  |
| Lypd2         | 0 | 0        | 0 | 5    | 0.083333  | 0        | 3        | Unclassified | chr15:74562681-74566743   | 2.063   |
| 1110020G09Rik | 0 | 0        | 0 | 414  | 6.9       | 4.04902  | 20.35685 | Unclassified | chr15:8999008-9040244     | 39.237  |
| Stk39         | 0 | 0        | 0 | 772  | 12.86667  | 2.01643  | 3.871125 | Unclassified | chr2:68048503-68312038    | 261.536 |
| C030046I01Rik | 0 | 0        | 0 | 207  | 3.45      | 18.8069  | 8.795907 | Unclassified | chr10:79372797-79381675   | 6.879   |
| 1700019L03Rik | 0 | 0        | 0 | 62   | 1.033333  | 0.117985 | 0.435975 | Unclassified | chr2:32632932-32641925    | 6.994   |
| Rgr           | 0 | 0        | 0 | 14   | 0.233333  | 0.015451 | 0.932194 | Unclassified | chr14:37850675-37864150   | 11.476  |
| Ly9           | 0 | 0        | 0 | 294  | 4.9       | 29.3549  | 5.607051 | Unclassified | chr1:173518743-173539491  | 18.749  |
| Sepsecs       | 0 | 0        | 0 | 315  | 5.25      | 4.65919  | 16.71575 | Unclassified | chr5:53034645-53062940    | 26.296  |

|                      |   |   |   |      |           |          |          |   |              |                           |         |
|----------------------|---|---|---|------|-----------|----------|----------|---|--------------|---------------------------|---------|
| <b>Oifr1312</b>      | 0 | 0 | 0 | 0    | 0         | 0        | 0        | 0 | Unclassified | chr2:111882233-111885187  | 0.955   |
| <b>Hspa12b</b>       | 0 | 0 | 0 | 53   | 0.883333  | 0.195968 | 0.252584 | 0 | Unclassified | chr2:130951147-130971719  | 18.573  |
| <b>Gm1661</b>        | 0 | 0 | 0 | 75   | 1.25      | 0.21628  | 4.851999 | 0 | Unclassified | chr4:116887794-116926522  | 36.729  |
| <b>Akt3</b>          | 0 | 0 | 0 | 612  | 10.2      | 1.57779  | 0.812042 | 0 | Unclassified | chr1:178952245-179180898  | 226.654 |
| <b>Zfp69</b>         | 0 | 0 | 0 | 326  | 5.433333  | 2.68536  | 53.26747 | 0 | Stalled      | chr4:120602743-120626306  | 21.564  |
| <b>Pgbd5</b>         | 0 | 0 | 0 | 86   | 1.433333  | 0.122536 | 1.801098 | 0 | Unclassified | chr8:126892948-126959836  | 64.889  |
| <b>Zdhhc13</b>       | 0 | 0 | 0 | 402  | 6.7       | 3.92394  | 26.60803 | 0 | Unclassified | chr7:56042372-56082807    | 38.436  |
| <b>Kng2</b>          | 0 | 0 | 0 | 23   | 0.383333  | 0.078608 | 0        | 0 | Unclassified | chr16:22985924-23031174   | 43.251  |
| <b>Acsm2</b>         | 0 | 0 | 0 | 16   | 0.266667  | 0.015881 | 0        | 0 | Unclassified | chr7:126703224-126740105  | 34.882  |
| <b>Oifr44</b>        | 0 | 0 | 0 | 5    | 0.083333  | 0.029903 | 1.629149 | 0 | Unclassified | chr9:39291788-39303573    | 9.786   |
| <b>Ftl2</b>          | 0 | 0 | 0 | 1    | 0.016667  | 38.5812  | 0        | 0 | Unclassified | chr4:125179288-125182245  | 0.958   |
| <b>Oifr263-ps1</b>   | 0 | 0 | 0 | 1    | 0.016667  | 0.013402 | 1        | 0 | Unclassified | chr13:21222645-21225599   | 0.955   |
| <b>Oifr48</b>        | 0 | 0 | 0 | 2    | 0.033333  | 0        | 1        | 0 | Unclassified | chr2:89684222-89687128    | 0.907   |
| <b>Lins2</b>         | 0 | 0 | 0 | 34   | 0.566667  | 1.72617  | 0.939636 | 0 | Unclassified | chr7:738590989-73859542   | 6.554   |
| <b>Oifr46</b>        | 0 | 0 | 0 | 0    | 0         | 0.002754 | 0        | 0 | Unclassified | chr7:147794066-147797023  | 0.958   |
| <b>Adam23</b>        | 0 | 0 | 0 | 108  | 1.8       | 0.084723 | 1.769779 | 0 | Unclassified | chr1:63490477-63643089    | 150.613 |
| <b>Oifr5</b>         | 0 | 0 | 0 | 2    | 0.033333  | 0        | 0        | 0 | Unclassified | chr7:6432926-6435865      | 0.94    |
| <b>Oifr49</b>        | 0 | 0 | 0 | 6    | 0.1       | 0        | 3        | 0 | Unclassified | chr14:54901570-54904600   | 1.031   |
| <b>Gemin7</b>        | 0 | 0 | 0 | 475  | 7.916667  | 42.659   | 9.077404 | 0 | Unclassified | chr7:20150297-20160692    | 8.396   |
| <b>Rab42</b>         | 0 | 0 | 0 | 29   | 0.483333  | 0.976482 | 24       | 0 | Unclassified | chr4:131858108-131861271  | 1.164   |
| <b>Gm7197</b>        | 0 | 0 | 0 | 0    | 0         | 0        | 0        | 0 | Unclassified | chrX:83643544-83646583    | 1.04    |
| <b>Etl4</b>          | 0 | 0 | 0 | 345  | 5.75      | 0.115836 | 0        | 0 | Unclassified | chr2:20209539-20732162    | 520.624 |
| <b>Ccdc14</b>        | 0 | 0 | 0 | 265  | 4.416667  | 1.85009  | 14.69061 | 0 | Stalled      | chr16:34688701-34725280   | 34.58   |
| <b>Ncoa1</b>         | 0 | 0 | 0 | 1010 | 16.833333 | 3.4535   | 27.03717 | 0 | Stalled      | chr12:4247362-4486060     | 236.699 |
| <b>Prss37</b>        | 0 | 0 | 0 | 6    | 0.1       | 0.097402 | 2.359795 | 0 | Unclassified | chr6:40464822-40471507    | 4.686   |
| <b>Gm4922</b>        | 0 | 0 | 0 | 6    | 0.1       | 0.032653 | 0        | 0 | Unclassified | chr10:18499532-18508599   | 7.068   |
| <b>Oifr706</b>       | 0 | 0 | 0 | 3    | 0.05      | 0.026953 | 0        | 0 | Unclassified | chr7:114029378-114032329  | 0.952   |
| <b>Oifr521</b>       | 0 | 0 | 0 | 1    | 0.016667  | 0.106265 | 0        | 0 | Unclassified | chr7:106913673-106916637  | 0.965   |
| <b>Zkscan17</b>      | 0 | 0 | 0 | 514  | 8.566667  | 5.95044  | 4.923902 | 0 | Unclassified | chr11:59299022-59322142   | 21.121  |
| <b>A930005I04Rik</b> | 0 | 0 | 0 | 103  | 1.716667  | 0.344027 | 1.155521 | 0 | Unclassified | chr5:35256563-35266488    | 7.926   |
| <b>Sdha</b>          | 0 | 0 | 0 | 560  | 9.333333  | 47.2142  | 41.67701 | 0 | Unclassified | chr13:74459702-74489688   | 27.987  |
| <b>Oifr93</b>        | 0 | 0 | 0 | 2    | 0.033333  | 0.009615 | 2        | 0 | Unclassified | chr17:37287976-37290915   | 0.94    |
| <b>Tmc3</b>          | 0 | 0 | 0 | 70   | 1.166667  | 0.109871 | 1.456157 | 0 | Unclassified | chr7:90731440-90772219    | 38.78   |
| <b>Kiss1r</b>        | 0 | 0 | 0 | 153  | 2.55      | 2.6837   | 19.53496 | 0 | Stalled      | chr10:79377715-79385015   | 5.301   |
| <b>Cygb</b>          | 0 | 0 | 0 | 29   | 0.483333  | 0.896055 | 1.113997 | 0 | Unclassified | chr11:116506908-116517627 | 8.72    |
| <b>Ercc2</b>         | 0 | 0 | 0 | 444  | 7.4       | 14.7057  | 3.354161 | 0 | Unclassified | chr7:19965387-19981041    | 13.655  |
| <b>Spast</b>         | 0 | 0 | 0 | 484  | 8.066667  | 3.88598  | 27.39044 | 0 | Unclassified | chr17:74736326-74790453   | 52.128  |
| <b>Nlrp2</b>         | 0 | 0 | 0 | 29   | 0.483333  | 0.022591 | 0.647754 | 0 | Unclassified | chr7:5250148-5304637      | 52.49   |
| <b>Erf</b>           | 0 | 0 | 0 | 296  | 4.933333  | 5.81263  | 5.847429 | 0 | Unclassified | chr7:26027579-26037777    | 8.199   |
| <b>Oifr574</b>       | 0 | 0 | 0 | 1    | 0.016667  | 0        | 0        | 0 | Unclassified | chr7:110094980-110098021  | 1.042   |
| <b>2610020H08Rik</b> | 0 | 0 | 0 | 328  | 5.466667  | 6.58709  | 33.00103 | 0 | Stalled      | chr7:126935643-126992455  | 54.813  |
| <b>Trnau1ap</b>      | 0 | 0 | 0 | 906  | 15.1      | 14.5954  | 8.125446 | 0 | Unclassified | chr4:131867677-131887453  | 17.777  |
| <b>Lims2</b>         | 0 | 0 | 0 | 48   | 0.8       | 0.037963 | 0.367213 | 0 | Unclassified | chr18:32089160-32118273   | 27.114  |
| <b>Stk38</b>         | 0 | 0 | 0 | 587  | 9.783333  | 16.8459  | 21.99266 | 0 | Unclassified | chr17:29107829-29146882   | 37.054  |
| <b>Ankrd49</b>       | 0 | 0 | 0 | 139  | 2.316667  | 5.31733  | 0.655138 | 0 | Unclassified | chr9:14584641-14589408    | 2.768   |
| <b>Oxgr1</b>         | 0 | 0 | 0 | 17   | 0.283333  | 0.402915 | 1.185933 | 0 | Unclassified | chr14:120418806-120443657 | 22.852  |
| <b>Fbxl5</b>         | 0 | 0 | 0 | 594  | 9.9       | 6.43223  | 33.87352 | 0 | Unclassified | chr5:44135856-44175388    | 37.533  |
| <b>BC026782</b>      | 0 | 0 | 0 | 7    | 0.116667  | 0.026797 | 0        | 0 | Unclassified | chr1:141706869-141757276  | 48.408  |
| <b>Tmem86a</b>       | 0 | 0 | 0 | 106  | 1.766667  | 0.74422  | 18.44907 | 0 | Stalled      | chr7:54304009-54310146    | 4.138   |
| <b>Nif311</b>        | 0 | 0 | 0 | 213  | 3.55      | 4.05768  | 1.511188 | 0 | Elongating   | chr1:58502476-58519120    | 14.645  |
| <b>Ppa1</b>          | 0 | 0 | 0 | 814  | 13.56667  | 38.3636  | 21.42068 | 0 | Unclassified | chr10:61109368-61136913   | 25.546  |
| <b>Fam45a</b>        | 0 | 0 | 0 | 295  | 4.916667  | 3.01425  | 26.80051 | 0 | Stalled      | chr19:60885472-60912130   | 24.659  |
| <b>Ccdc80</b>        | 0 | 0 | 0 | 36   | 0.6       | 0.172149 | 0.499036 | 0 | Unclassified | chr16:45092165-45128037   | 33.873  |
| <b>Rragb</b>         | 0 | 0 | 0 | 98   | 1.633333  | 3.47874  | 22.501   | 0 | Stalled      | chrX:149572500-149606485  | 31.986  |
| <b>Klf8</b>          | 0 | 0 | 0 | 133  | 2.216667  | 0.287475 | 9.851109 | 0 | Unclassified | chrX:149670587-149830677  | 158.091 |
| <b>Unc13c</b>        | 0 | 0 | 0 | 247  | 4.116667  | 0.0349   | 0        | 0 | Unclassified | chr9:73327230-73783374    | 454.145 |
| <b>Cd51</b>          | 0 | 0 | 0 | 40   | 0.666667  | 0.251671 | 0.516792 | 0 | Unclassified | chr3:87159802-87174996    | 13.195  |
| <b>Lyzl1</b>         | 0 | 0 | 0 | 18   | 0.3       | 0.090468 | 0.981086 | 0 | Unclassified | chr18:4163829-4182234     | 16.406  |
| <b>Tmem220</b>       | 0 | 0 | 0 | 91   | 1.516667  | 0.737159 | 10.29323 | 0 | Stalled      | chr11:66836655-66848292   | 9.638   |
| <b>Fam109b</b>       | 0 | 0 | 0 | 30   | 0.5       | 0.183966 | 0.399465 | 0 | Unclassified | chr15:82169608-82176140   | 4.533   |
| <b>0610009D07Rik</b> | 0 | 0 | 0 | 447  | 7.45      | 23.1932  | 17.50824 | 0 | Unclassified | chr12:4822413-4834465     | 10.053  |
| <b>Sdhc</b>          | 0 | 0 | 0 | 314  | 5.233333  | 34.5604  | 23.99053 | 0 | Stalled      | chr1:173059288-173082734  | 21.447  |
| <b>Txlnb</b>         | 0 | 0 | 0 | 177  | 2.95      | 0.523092 | 18.23371 | 0 | Stalled      | chr10:17514024-17565469   | 49.446  |
| <b>Nanos2</b>        | 0 | 0 | 0 | 5    | 0.083333  | 0.089064 | 2        | 0 | Unclassified | chr7:19570872-19574311    | 1.44    |
| <b>6030446N20Rik</b> | 0 | 0 | 0 | 684  | 11.4      | 1.74915  | 31.68386 | 0 | Stalled      | chr18:12140447-12281962   | 139.516 |
| <b>Ust</b>           | 0 | 0 | 0 | 474  | 7.9       | 0.810577 | 19.59177 | 0 | Stalled      | chr10:7924550-8240623     | 314.074 |
| <b>Sic41a2</b>       | 0 | 0 | 0 | 327  | 5.45      | 0.610637 | 10.2791  | 0 | Stalled      | chr10:82693883-82802562   | 106.68  |
| <b>Adamts8</b>       | 0 | 0 | 0 | 43   | 0.716667  | 0.158695 | 1.028314 | 0 | Unclassified | chr9:30748147-30770443    | 20.297  |
| <b>A230050P20Rik</b> | 0 | 0 | 0 | 202  | 3.366667  | 18.8832  | 4.582129 | 0 | Unclassified | chr9:20671085-20678751    | 5.667   |
| <b>Grrp1</b>         | 0 | 0 | 0 | 14   | 0.233333  | 0.595865 | 0.726678 | 0 | Unclassified | chr4:133807024-133812021  | 2.998   |
| <b>Zcchc12</b>       | 0 | 0 | 0 | 10   | 0.166667  | 0.067227 | 2.575342 | 0 | Unclassified | chrX:33733898-33739153    | 3.256   |
| <b>Hnrp11</b>        | 0 | 0 | 0 | 107  | 1.783333  | 2.16725  | 10.85212 | 0 | Stalled      | chr17:80428826-80463674   | 32.849  |
| <b>Alp2</b>          | 0 | 0 | 0 | 400  | 6.666667  | 8.06996  | 59.85449 | 0 | Stalled      | chr9:30957141-31021400    | 62.26   |
| <b>A230046K03Rik</b> | 0 | 0 | 0 | 1043 | 17.38333  | 4.59225  | 31.04853 | 0 | Unclassified | chr10:83004685-83059218   | 52.534  |
| <b>Tmprss8</b>       | 0 | 0 | 0 | 8    | 0.133333  | 0.034922 | 1.034076 | 0 | Unclassified | chr17:24109094-24114197   | 3.104   |
| <b>Hmgn1</b>         | 0 | 0 | 0 | 449  | 7.483333  | 49.257   | 9.769726 | 0 | Unclassified | chr16:96343194-96351332   | 6.139   |
| <b>Usp25</b>         | 0 | 0 | 0 | 711  | 11.85     | 7.23659  | 19.31703 | 0 | Unclassified | chr16:77012313-77117025   | 102.713 |
| <b>Abt1</b>          | 0 | 0 | 0 | 249  | 4.15      | 5.83204  | 5.671837 | 0 | Unclassified | chr13:23510229-23517735   | 5.507   |
| <b>EG635895</b>      | 0 | 0 | 0 | 0    | 0         | 0.017616 | 0        | 0 | Unclassified | chr17:14083379-14087685   | 2.307   |
| <b>Zfp354c</b>       | 0 | 0 | 0 | 165  | 2.75      | 1.51507  | 10.16803 | 0 | Stalled      | chr11:50624586-50643233   | 16.648  |
| <b>Ms4a7</b>         | 0 | 0 | 0 | 17   | 0.283333  | 0.468711 | 2.666278 | 0 | Unclassified | chr19:11395897-11412606   | 14.71   |
| <b>Ankle2</b>        | 0 | 0 | 0 | 734  | 12.23333  | 7.6673   | 24.17015 | 0 | Unclassified | chr5:110658059-110685667  | 25.609  |
| <b>Mcc</b>           | 0 | 0 | 0 | 378  | 6.3       | 0.105957 | 3.059927 | 0 | Unclassified | chr18:44584713-44973836   | 387.124 |
| <b>4921501E09Rik</b> | 0 | 0 | 0 | 6    | 0.1       | 0.03108  | 2.372992 | 0 | Unclassified | chr17:33201087-33207003   | 3.917   |
| <b>Ttf2</b>          | 0 | 0 | 0 | 463  | 7.716667  | 6.22624  | 12.91963 | 0 | Unclassified | chr3:100742783-100775586  | 30.804  |
| <b>Oifr985</b>       | 0 | 0 | 0 | 1    | 0.016667  | 0.034453 | 0        | 0 | Unclassified | chr9:39934508-39937624    | 1.117   |



|               |   |   |   |      |          |          |          |              |                           |         |
|---------------|---|---|---|------|----------|----------|----------|--------------|---------------------------|---------|
| Nr1h5         | 0 | 0 | 0 | 25   | 0.416667 | 0.07295  | 1.548717 | Unclassified | chr3:102743580-102770056  | 24.477  |
| Fvxo34        | 0 | 0 | 0 | 553  | 9.216667 | 4.6321   | 17.10327 | Unclassified | chr14:48090235-48151637   | 59.403  |
| Av19          | 0 | 0 | 0 | 541  | 9.016667 | 3.01062  | 37.09757 | Unclassified | chr6:56662898-56711905    | 47.008  |
| Ctsf          | 0 | 0 | 0 | 21   | 0.35     | 0.551408 | 1.140304 | Unclassified | chr19:4853128-4860912     | 5.785   |
| Ccdc36        | 0 | 0 | 0 | 43   | 0.716667 | 0.179312 | 0.735427 | Unclassified | chr9:108305970-108332813  | 24.844  |
| Kcnp3         | 0 | 0 | 0 | 92   | 1.533333 | 0.089617 | 1.253464 | Unclassified | chr2:127282233-127349106  | 64.874  |
| Socs5         | 0 | 0 | 0 | 201  | 3.35     | 0.834199 | 21.06833 | Stalled      | chr17:87505018-87536925   | 29.908  |
| Pdk1          | 0 | 0 | 0 | 365  | 6.083333 | 8.0337   | 24.75627 | Stalled      | chr2:71709328-71741914    | 30.587  |
| Bnc2          | 0 | 0 | 0 | 253  | 4.216667 | 0.035695 | 0        | Unclassified | chr4:83918445-84322990    | 402.546 |
| Lsm5          | 0 | 0 | 0 | 140  | 2.333333 | 6.95205  | 27.42722 | Stalled      | chr6:56651056-56656693    | 3.638   |
| Stx12         | 0 | 0 | 0 | 494  | 8.233333 | 8.11394  | 39.02695 | Unclassified | chr4:132409978-132442373  | 30.396  |
| Ptpn20        | 0 | 0 | 0 | 23   | 0.383333 | 0.033181 | 1.432511 | Unclassified | chr14:34400455-34453940   | 51.486  |
| Mcrs1         | 0 | 0 | 0 | 425  | 7.083333 | 10.9627  | 6.643169 | Unclassified | chr15:99073248-99084392   | 9.145   |
| Ptpn2         | 0 | 0 | 0 | 1106 | 18.43333 | 11.159   | 38.54165 | Unclassified | chr18:67825154-67886275   | 59.122  |
| Fabp6         | 0 | 0 | 0 | 11   | 0.183333 | 0        | 0.386019 | Unclassified | chr11:43409613-43417013   | 5.401   |
| Zfp553        | 0 | 0 | 0 | 279  | 4.65     | 7.91628  | 8.66829  | Unclassified | chr7:134374956-134381374  | 4.419   |
| Lrig1         | 0 | 0 | 0 | 190  | 3.166667 | 0.229722 | 2.037586 | Unclassified | chr6:94554522-94652139    | 95.618  |
| Atp5sl        | 0 | 0 | 0 | 265  | 4.416667 | 14.5579  | 5.218425 | Unclassified | chr7:26402511-26410569    | 6.059   |
| Ptpn4         | 0 | 0 | 0 | 828  | 13.8     | 1.0675   | 41.30155 | Stalled      | chr1:121554669-121735648  | 178.98  |
| 1700029P11Rik | 0 | 0 | 0 | 1    | 0.016667 | 0        | 1        | Unclassified | chr15:81808974-81811993   | 1.02    |
| Bckdhh        | 0 | 0 | 0 | 281  | 4.683333 | 1.49432  | 0        | Unclassified | chr9:83840387-84017847    | 175.461 |
| Olfr676       | 0 | 0 | 0 | 1    | 0.016667 | 0.026869 | 1        | Unclassified | chr7:112181713-112184667  | 0.955   |
| Zfp111        | 0 | 0 | 0 | 28   | 0.466667 | 0.129188 | 3.927355 | Unclassified | chr7:24978233-24995168    | 14.936  |
| Chd6          | 0 | 0 | 0 | 799  | 13.31667 | 2.9015   | 8.364741 | Unclassified | chr2:160772713-160936792  | 162.08  |
| Bcl2a1b       | 0 | 0 | 0 | 59   | 0.983333 | 58.3365  | 9.271012 | Unclassified | chr9:89092110-89102676    | 8.567   |
| Olfr568       | 0 | 0 | 0 | 1    | 0.016667 | 0        | 1        | Unclassified | chr7:110023635-110026577  | 0.943   |
| Olfr558       | 0 | 0 | 0 | 13   | 0.216667 | 0.013154 | 1.398548 | Unclassified | chr7:109848836-109860568  | 9.733   |
| Olfr561       | 0 | 0 | 0 | 1    | 0.016667 | 0.040687 | 0        | Unclassified | chr7:109921039-109923984  | 0.946   |
| Olfr585       | 0 | 0 | 0 | 1    | 0.016667 | 0.026753 | 1        | Unclassified | chr7:110244256-110247213  | 0.958   |
| Sic16a5       | 0 | 0 | 0 | 55   | 0.916667 | 0.199459 | 0.729354 | Unclassified | chr11:115321786-115335712 | 11.927  |
| Olfr572       | 0 | 0 | 0 | 0    | 0        | 0.040177 | 0        | Unclassified | chr7:110074143-110077100  | 0.958   |
| Olfr569       | 0 | 0 | 0 | 1    | 0.016667 | 0.029914 | 1        | Unclassified | chr7:110035720-110038665  | 0.946   |
| Stap1         | 0 | 0 | 0 | 235  | 3.916667 | 6.56517  | 2.99724  | Elongating   | chr5:86498852-86533018    | 32.167  |
| Trhr          | 0 | 0 | 0 | 16   | 0.266667 | 0.006447 | 0        | Unclassified | chr15:44025680-44067458   | 39.779  |
| Fam48a        | 0 | 0 | 0 | 399  | 6.65     | 12.4229  | 15.5466  | Unclassified | chr3:54495026-54520759    | 23.734  |
| Tecta         | 0 | 0 | 0 | 82   | 1.366667 | 0.036683 | 0.464195 | Unclassified | chr9:42137705-42210012    | 70.308  |
| Gm766         | 0 | 0 | 0 | 21   | 0.35     | 0        | 0.482105 | Unclassified | chr6:142734300-142754986  | 18.687  |
| B020004J07Rik | 0 | 0 | 0 | 4    | 0.066667 | 0.012979 | 0        | Unclassified | chr4:101507573-101518627  | 9.055   |
| Atg4b         | 0 | 0 | 0 | 498  | 8.3      | 6.65505  | 18.10437 | Unclassified | chr1:95649609-95686106    | 34.498  |
| E030002O03Rik | 0 | 0 | 0 | 11   | 0.183333 | 0.062574 | 1.213704 | Unclassified | chr7:111301526-111315330  | 11.805  |
| 2610034M16Rik | 0 | 0 | 0 | 62   | 1.033333 | 0.030705 | 0        | Unclassified | chr17:59018230-59132798   | 112.569 |
| Muc15         | 0 | 0 | 0 | 4    | 0.066667 | 0        | 0        | Unclassified | chr2:110559764-110578120  | 16.357  |
| Olfr684       | 0 | 0 | 0 | 1    | 0.016667 | 0.040947 | 1        | Unclassified | chr7:112305255-112308194  | 0.94    |
| Btnl5         | 0 | 0 | 0 | 13   | 0.216667 | 0.092626 | 0        | Unclassified | chr17:34624350-34636374   | 10.025  |
| Col4a3        | 0 | 0 | 0 | 126  | 2.1      | 0.028592 | 1.039281 | Unclassified | chr1:82581495-82718634    | 135.14  |
| S100a14       | 0 | 0 | 0 | 5    | 0.083333 | 0        | 1        | Unclassified | chr3:90328777-90332755    | 1.979   |
| Pole          | 0 | 0 | 0 | 1269 | 21.15    | 9.63851  | 14.22318 | Unclassified | chr5:110713337-110766472  | 51.136  |
| Tcte2         | 0 | 0 | 0 | 69   | 1.15     | 0.063718 | 1.244621 | Unclassified | chr17:13853442-13900401   | 44.96   |
| Krtap9-3      | 0 | 0 | 0 | 1    | 0.016667 | 0        | 0        | Unclassified | chr11:99458661-99461420   | 0.76    |
| Tcte1         | 0 | 0 | 0 | 43   | 0.716667 | 0.133559 | 0.370494 | Unclassified | chr17:45658382-45679626   | 19.245  |
| Dynl1b        | 0 | 0 | 0 | 144  | 2.4      | 0        | 20.25321 | Stalled      | chr17:6427259-6435443     | 6.185   |
| Nkx2-1        | 0 | 0 | 0 | 16   | 0.266667 | 0.178272 | 0.284232 | Unclassified | chr12:57632925-57639895   | 4.971   |
| Lman2l        | 0 | 0 | 0 | 160  | 2.666667 | 4.60117  | 13.1772  | Stalled      | chr1:36480030-36504084    | 22.055  |
| Rgs12         | 0 | 0 | 0 | 397  | 6.616667 | 0.975263 | 8.954032 | Unclassified | chr5:35290096-35376240    | 84.145  |
| Olfr1126      | 0 | 0 | 0 | 0    | 0        | 0.039436 | 0        | Unclassified | chr2:87295323-87298268    | 0.946   |
| 4930547N16Rik | 0 | 0 | 0 | 521  | 8.683333 | 5.88305  | 67.81813 | Stalled      | chr10:87554142-87611686   | 55.545  |
| Taf1d         | 0 | 0 | 0 | 953  | 15.88333 | 16.913   | 6.125908 | Unclassified | chr9:15108657-15116548    | 5.892   |
| 4930550C14Rik | 0 | 0 | 0 | 116  | 1.933333 | 0.041443 | 10.28901 | Stalled      | chr9:53211390-53240908    | 27.519  |
| Col4a4        | 0 | 0 | 0 | 196  | 3.266667 | 0.049243 | 0.821127 | Unclassified | chr1:82447297-82585424    | 136.128 |
| Olfr1130      | 0 | 0 | 0 | 0    | 0        | 0.005579 | 0        | Unclassified | chr2:87445546-87448491    | 0.946   |
| Olfr545       | 0 | 0 | 0 | 5    | 0.083333 | 0.047088 | 2        | Unclassified | chr7:109642336-109645287  | 0.952   |
| Actc1         | 0 | 0 | 0 | 7    | 0.116667 | 0.222298 | 0.429875 | Unclassified | chr2:113873024-113880547  | 5.524   |
| Pck1          | 0 | 0 | 0 | 23   | 0.383333 | 0.269456 | 0.447071 | Unclassified | chr2:172976573-172984754  | 6.182   |
| Apol10b       | 0 | 0 | 0 | 16   | 0.266667 | 0.112498 | 2.496472 | Unclassified | chr15:77414587-77428555   | 11.969  |
| Olfr192       | 0 | 0 | 0 | 0    | 0        | 0.009761 | 0        | Unclassified | chr16:59097891-59100816   | 0.926   |
| Olfr118       | 0 | 0 | 0 | 0    | 0        | 0.041393 | 0        | Unclassified | chr17:37806969-37809933   | 0.965   |
| Actg2         | 0 | 0 | 0 | 32   | 0.533333 | 0.068224 | 0.887653 | Unclassified | chr6:83462902-83488245    | 23.344  |
| Smox          | 0 | 0 | 0 | 113  | 1.883333 | 3.27785  | 7.552108 | Unclassified | chr2:131315678-131350908  | 33.231  |
| Abi2          | 0 | 0 | 0 | 123  | 2.05     | 0.460856 | 9.033298 | Unclassified | chr1:60464641-60538002    | 71.362  |
| Hcrr2         | 0 | 0 | 0 | 47   | 0.783333 | 0.312654 | 0.692198 | Unclassified | chr9:76073686-76173385    | 97.7    |
| Gnb5          | 0 | 0 | 0 | 102  | 1.7      | 2.10812  | 1.021753 | Unclassified | chr9:75157201-75193478    | 34.278  |
| Gtf2e2        | 0 | 0 | 0 | 406  | 6.766667 | 9.39395  | 35.23465 | Stalled      | chr8:34840538-34887645    | 45.108  |
| Mal           | 0 | 0 | 0 | 29   | 0.483333 | 0.073923 | 0.454226 | Unclassified | chr2:127458961-127484431  | 23.471  |
| Mak           | 0 | 0 | 0 | 77   | 1.283333 | 0.09395  | 2.644406 | Unclassified | chr13:41120488-41177075   | 54.588  |
| Cnndbp1       | 0 | 0 | 0 | 169  | 2.816667 | 14.5832  | 17.89092 | Stalled      | chr2:120832143-120842648  | 8.506   |
| Mfap2         | 0 | 0 | 0 | 48   | 0.8      | 0.095024 | 0.383523 | Unclassified | chr4:140564551-140571898  | 5.348   |
| Man1a2        | 0 | 0 | 0 | 1342 | 22.36667 | 6.80025  | 48.497   | Unclassified | chr3:100366126-100491396  | 123.271 |
| Man2a1        | 0 | 0 | 0 | 1150 | 19.16667 | 8.89788  | 10.37198 | Unclassified | chr17:64948988-65104450   | 153.463 |
| Pex11c        | 0 | 0 | 0 | 214  | 3.566667 | 3.64229  | 8.302753 | Unclassified | chr8:3458816-3469648      | 8.833   |
| B230217C12Rik | 0 | 0 | 0 | 109  | 1.816667 | 1.93964  | 2.285519 | Unclassified | chr11:97700093-97704357   | 2.265   |
| Pls1          | 0 | 0 | 0 | 95   | 1.583333 | 0.159554 | 2.536496 | Unclassified | chr9:95653062-95747698    | 92.637  |
| Vps36         | 0 | 0 | 0 | 395  | 6.583333 | 22.7598  | 17.6907  | Unclassified | chr8:23301331-23329069    | 25.739  |
| Heca          | 0 | 0 | 0 | 475  | 7.916667 | 9.41099  | 13.59134 | Unclassified | chr10:17620271-17669873   | 47.603  |
| Olfr371       | 0 | 0 | 0 | 0    | 0        | 0.054596 | 0        | Unclassified | chr8:87752395-87755334    | 0.94    |
| Fam169a       | 0 | 0 | 0 | 112  | 1.866667 | 0.126737 | 0        | Unclassified | chr13:97835241-97899476   | 62.236  |
| Olfm2         | 0 | 0 | 0 | 194  | 3.233333 | 0.184891 | 2.455333 | Unclassified | chr9:20472429-20534658    | 60.23   |

|               |   |   |   |      |           |          |          |              |                           |         |
|---------------|---|---|---|------|-----------|----------|----------|--------------|---------------------------|---------|
| Lipn          | 0 | 0 | 0 | 14   | 0.233333  | 0        | 1.2018   | Unclassified | chr19:34139847-34159408   | 17.562  |
| Clic6         | 0 | 0 | 0 | 59   | 0.983333  | 0.198597 | 0.876124 | Unclassified | chr16:92496391-92541486   | 43.096  |
| 4933427D06Rik | 0 | 0 | 0 | 24   | 0.4       | 0.092907 | 1.671711 | Unclassified | chr6:89044108-89060031    | 13.924  |
| 8430410A17Rik | 0 | 0 | 0 | 214  | 3.566667  | 5.02765  | 25.389   | Stalled      | chr6:87861969-87886607    | 22.639  |
| Aox3          | 0 | 0 | 0 | 111  | 1.85      | 0.047032 | 0.44421  | Unclassified | chr1:58167979-58257296    | 87.318  |
| Gm9294        | 0 | 0 | 0 | 1    | 0.016667  | 27.5081  | 0        | Unclassified | chr7:50208955-50211778    | 0.824   |
| Bat2          | 0 | 0 | 0 | 938  | 15.633333 | 76.3954  | 0.848148 | Unclassified | chr17:35286030-35301993   | 13.964  |
| Defb18        | 0 | 0 | 0 | 0    | 0         | 0        | 0        | Unclassified | chr1:18226553-18229524    | 0.972   |
| Crbn          | 0 | 0 | 0 | 425  | 7.083333  | 3.45032  | 6.800294 | Unclassified | chr6:106728238-106752068  | 21.831  |
| Aplp1         | 0 | 0 | 0 | 21   | 0.35      | 0.486451 | 2.970063 | Unclassified | chr7:31220000-31232580    | 10.581  |
| Api5          | 0 | 0 | 0 | 553  | 9.216667  | 18.0786  | 15.87836 | Unclassified | chr2:94251883-94280304    | 26.422  |
| Apoa2         | 0 | 0 | 0 | 5    | 0.083333  | 1.30377  | 2        | Unclassified | chr1:173153184-173156510  | 1.327   |
| E330034G19Rik | 0 | 0 | 0 | 7    | 0.116667  | 0.051499 | 0.722184 | Unclassified | chr14:25110585-25129181   | 16.597  |
| Gsc           | 0 | 0 | 0 | 9    | 0.15      | 0.316587 | 0.512025 | Unclassified | chr12:105709418-105713446 | 2.029   |
| Psmc6         | 0 | 0 | 0 | 399  | 6.65      | 19.1843  | 12.85945 | Unclassified | chr14:45947498-45968746   | 19.249  |
| Cdc14b        | 0 | 0 | 0 | 268  | 4.466667  | 0.854537 | 2.975658 | Unclassified | chr13:64293852-64378296   | 82.445  |
| Sh2d4b        | 0 | 0 | 0 | 105  | 1.75      | 0.197783 | 0.85457  | Unclassified | chr14:41629156-41708254   | 77.099  |
| Ucn3          | 0 | 0 | 0 | 8    | 0.133333  | 0.130247 | 0.378946 | Unclassified | chr13:3939935-3946595     | 4.661   |
| Mfsd7a        | 0 | 0 | 0 | 18   | 0.3       | 0.194187 | 1.034175 | Unclassified | chr5:108870072-108879910  | 7.839   |
| Shank2        | 0 | 0 | 0 | 349  | 5.816667  | 0.032512 | 0.417104 | Unclassified | chr7:151359424-151608580  | 247.157 |
| Mctp2         | 0 | 0 | 0 | 722  | 12.033333 | 0.911885 | 26.54858 | Stalled      | chr7:79222715-79453481    | 228.767 |
| Irx5          | 0 | 0 | 0 | 13   | 0.216667  | 0.175992 | 1.536597 | Unclassified | chr8:94879694-94885355    | 3.662   |
| 2210411K11Rik | 0 | 0 | 0 | 399  | 6.65      | 9.32635  | 19.46655 | Stalled      | chr7:4736386-4743162      | 4.777   |
| 4932415M13Rik | 0 | 0 | 0 | 0    | 0         | 0.01311  | 0        | Unclassified | chr17:53861075-53865058   | 1.984   |
| Cep76         | 0 | 0 | 0 | 545  | 9.083333  | 3.2269   | 51.74003 | Unclassified | chr18:67777050-67802990   | 23.941  |
| Dgkh          | 0 | 0 | 0 | 397  | 6.616667  | 0.662211 | 7.377618 | Unclassified | chr14:78969415-79126896   | 155.482 |
| Dennd1c       | 0 | 0 | 0 | 293  | 4.883333  | 11.4522  | 10.39705 | Unclassified | chr17:57205477-57219933   | 12.457  |
| Rasl12        | 0 | 0 | 0 | 26   | 0.433333  | 0.658338 | 1.641143 | Unclassified | chr9:65244294-65260512    | 14.219  |
| Ptgs2         | 0 | 0 | 0 | 23   | 0.383333  | 0.17925  | 6.015447 | Unclassified | chr1:151945253-151955142  | 7.89    |
| Kynu          | 0 | 0 | 0 | 642  | 10.7      | 11.1268  | 9.979066 | Unclassified | chr2:43408848-43538235    | 127.388 |
| Klhl30        | 0 | 0 | 0 | 31   | 0.516667  | 0.016975 | 0.276779 | Unclassified | chr1:93245649-93258981    | 11.333  |
| Gsdma         | 0 | 0 | 0 | 23   | 0.383333  | 0.137255 | 0        | Unclassified | chr11:98523664-98539022   | 13.359  |
| Psmc9         | 0 | 0 | 0 | 359  | 5.983333  | 10.3217  | 7.98166  | Unclassified | chr5:123676198-123700134  | 21.937  |
| Adamts2       | 0 | 0 | 0 | 239  | 3.983333  | 0.041111 | 0.917724 | Unclassified | chr11:50413586-50617551   | 201.966 |
| Brsk1         | 0 | 0 | 0 | 35   | 0.583333  | 0.184249 | 1.31124  | Unclassified | chr7:4640529-4667598      | 25.07   |
| Pde4a         | 0 | 0 | 0 | 317  | 5.283333  | 1.97837  | 2.474325 | Elongating   | chr9:20968157-21017692    | 47.536  |
| Mcm9          | 0 | 0 | 0 | 1661 | 27.683333 | 2.85404  | 4.413192 | Unclassified | chr10:53257129-53352245   | 93.117  |
| Pde1a         | 0 | 0 | 0 | 152  | 2.533333  | 0.081418 | 1.995386 | Unclassified | chr2:79674609-79971569    | 294.961 |
| Abpe          | 0 | 0 | 0 | 3    | 0.05      | 0        | 0        | Unclassified | chr7:32085787-32089996    | 2.21    |
| Mrgprg        | 0 | 0 | 0 | 9    | 0.15      | 0.098533 | 0.940975 | Unclassified | chr7:150949614-150954898  | 3.285   |
| Armcx6        | 0 | 0 | 0 | 32   | 0.533333  | 1.44571  | 19.88537 | Stalled      | chrX:131282993-131287958  | 2.966   |
| Tbccl         | 0 | 0 | 0 | 499  | 8.316667  | 3.92678  | 6.573408 | Unclassified | chr9:42220399-42282309    | 59.911  |
| Hba-x         | 0 | 0 | 0 | 2    | 0.033333  | 0.085728 | 0.339934 | Unclassified | chr11:32174599-32178113   | 1.515   |
| Gm906         | 0 | 0 | 0 | 0    | 0         | 0.013977 | 0        | Unclassified | chr13:50340549-50347677   | 5.129   |
| Cnot2         | 0 | 0 | 0 | 1269 | 21.15     | 15.0922  | 19.4642  | Unclassified | chr10:115922216-116020567 | 96.352  |
| 2410129H14Rik | 0 | 0 | 0 | 496  | 8.266667  | 5.40738  | 19.28622 | Unclassified | chr14:99433762-99447355   | 11.594  |
| Rap2c         | 0 | 0 | 0 | 288  | 4.8       | 6.22415  | 16.85175 | Stalled      | chrX:48357090-48373195    | 14.106  |
| Xrcc6bp1      | 0 | 0 | 0 | 203  | 3.383333  | 6.48766  | 23.78731 | Stalled      | chr10:126305485-126340427 | 32.943  |
| Klhdcc9       | 0 | 0 | 0 | 170  | 2.833333  | 2.91308  | 3.021219 | Unclassified | chr1:173288579-173292929  | 2.351   |
| E130306D19Rik | 0 | 0 | 0 | 84   | 1.4       | 4.27936  | 2.816718 | Elongating   | chr4:43509017-43514532    | 3.516   |
| Yipf6         | 0 | 0 | 0 | 306  | 5.1       | 3.09235  | 22.16532 | Stalled      | chrX:96131119-96144359    | 11.241  |
| 1600029D21Rik | 0 | 0 | 0 | 42   | 0.7       | 0.339809 | 0.403703 | Unclassified | chr9:50300629-50313744    | 11.116  |
| Zdhhc15       | 0 | 0 | 0 | 66   | 1.1       | 0.195527 | 8.62874  | Unclassified | chrX:101732310-101868403  | 134.094 |
| Btnl1         | 0 | 0 | 0 | 95   | 1.583333  | 0.703425 | 3.515915 | Unclassified | chr17:34512076-34522973   | 8.898   |
| Gm5478        | 0 | 0 | 0 | 4    | 0.066667  | 0.0182   | 0        | Unclassified | chr15:101473450-101479811 | 4.362   |
| Prkcc         | 0 | 0 | 0 | 161  | 2.683333  | 2.29207  | 3.907529 | Unclassified | chr7:3301657-3331005      | 27.349  |
| Prkch         | 0 | 0 | 0 | 299  | 4.983333  | 0.535848 | 3.639531 | Unclassified | chr12:74684027-74879171   | 193.145 |
| 2700081O15Rik | 0 | 0 | 0 | 275  | 4.583333  | 6.45898  | 2.778335 | Elongating   | chr19:7490114-7500393     | 8.28    |
| Olfr1377      | 0 | 0 | 0 | 0    | 0         | 0.044398 | 0        | Unclassified | chr11:50796204-50799128   | 0.925   |
| Olfr1378      | 0 | 0 | 0 | 2    | 0.033333  | 0.029787 | 0        | Unclassified | chr11:50780521-50783469   | 0.949   |
| Olfr1280      | 0 | 0 | 0 | 0    | 0         | 0        | 0        | Unclassified | chr2:111153637-111156555  | 0.919   |
| Olfr1336      | 0 | 0 | 0 | 0    | 0         | 0        | 0        | Unclassified | chr7:6411221-6414166      | 0.946   |
| Top1          | 0 | 0 | 0 | 1295 | 21.583333 | 29.5     | 28.72841 | Unclassified | chr2:160469632-160548499  | 76.868  |
| Olfr1348      | 0 | 0 | 0 | 2    | 0.033333  | 0.020425 | 2        | Unclassified | chr7:6453996-6456935      | 0.94    |
| Mamld1        | 0 | 0 | 0 | 55   | 0.916667  | 0.02069  | 0.665515 | Unclassified | chrX:68301430-68407892    | 104.463 |
| Tead4         | 0 | 0 | 0 | 97   | 1.616667  | 0.256467 | 1.31595  | Unclassified | chr6:128177160-128252831  | 73.672  |
| Cox6a1        | 0 | 0 | 0 | 328  | 5.466667  | 247.48   | 8.957659 | Unclassified | chr5:115795662-115800964  | 3.303   |
| Cox6a2        | 0 | 0 | 0 | 8    | 0.133333  | 2.81838  | 5        | Unclassified | chr7:135348948-135351880  | 0.933   |
| 2200002K05Rik | 0 | 0 | 0 | 59   | 0.983333  | 0.167618 | 1.320022 | Unclassified | chr9:15041488-15063857    | 20.37   |
| Cox6c         | 0 | 0 | 0 | 230  | 3.833333  | 83.0573  | 8.684876 | Unclassified | chr15:35861730-35870001   | 6.272   |
| Cox7a1        | 0 | 0 | 0 | 90   | 1.5       | 3.15156  | 3.421327 | Unclassified | chr7:30967189-30971049    | 1.861   |
| AW554918      | 0 | 0 | 0 | 648  | 10.8      | 0.659843 | 38.99989 | Stalled      | chr18:25325520-25625822   | 298.303 |
| Cox7c         | 0 | 0 | 0 | 153  | 2.55      | 41.779   | 8.991642 | Unclassified | chr13:86184402-86188400   | 1.999   |
| Cox8b         | 0 | 0 | 0 | 109  | 1.816667  | 0.10592  | 0.990215 | Unclassified | chr7:148084840-148088345  | 1.506   |
| Atp6v0e2      | 0 | 0 | 0 | 12   | 0.2       | 0.174895 | 1.570162 | Unclassified | chr6:48485567-48491797    | 4.231   |
| 1700029J11Rik | 0 | 0 | 0 | 109  | 1.816667  | 0.296217 | 3.912331 | Unclassified | chr2:172296053-172299816  | 1.764   |
| Gltscr1       | 0 | 0 | 0 | 632  | 10.533333 | 15.7253  | 0.381659 | Unclassified | chr7:16556610-16586844    | 28.235  |
| Me2           | 0 | 0 | 0 | 814  | 13.56667  | 16.6721  | 31.87903 | Unclassified | chr18:73929693-73977046   | 45.354  |
| Defb23        | 0 | 0 | 0 | 3    | 0.05      | 0.127907 | 0        | Unclassified | chr2:152284885-152292328  | 5.444   |
| Sico1a5       | 0 | 0 | 0 | 49   | 0.816667  | 0.041437 | 0        | Unclassified | chr6:142182749-142273470  | 88.722  |
| Msi1          | 0 | 0 | 0 | 67   | 1.116667  | 0.256142 | 0.834806 | Unclassified | chr5:115877693-115904211  | 24.519  |
| Adcy10        | 0 | 0 | 0 | 111  | 1.85      | 0.022144 | 3.344782 | Unclassified | chr1:167413313-167506904  | 91.592  |
| Prrb1         | 0 | 0 | 0 | 1    | 0.016667  | 0        | 0        | Unclassified | chr6:132156812-132162539  | 3.728   |
| Lrriq4        | 0 | 0 | 0 | 26   | 0.433333  | 0.370476 | 1.057456 | Unclassified | chr3:30541428-30571353    | 27.926  |
| Serpinb3c     | 0 | 0 | 0 | 2    | 0.033333  | 0.013168 | 0        | Unclassified | chr1:109167777-109176948  | 7.172   |
| Lce1m         | 0 | 0 | 0 | 0    | 0         | 0.043842 | 0        | Unclassified | chr3:92821728-92824982    | 1.255   |

|               |   |   |   |      |          |          |          |              |                           |         |
|---------------|---|---|---|------|----------|----------|----------|--------------|---------------------------|---------|
| Cdc27         | 0 | 0 | 0 | 837  | 13.95    | 5.73521  | 13.61535 | Unclassified | chr11:104363842-104413934 | 48.093  |
| Vta1          | 0 | 0 | 0 | 514  | 8.566667 | 20.5029  | 14.41291 | Unclassified | chr10:14375138-14427295   | 50.158  |
| Commd6        | 0 | 0 | 0 | 471  | 7.85     | 14.1966  | 12.22382 | Unclassified | chr14:102032983-102041688 | 6.706   |
| Cd302         | 0 | 0 | 0 | 171  | 2.85     | 0.774893 | 6.110866 | Unclassified | chr2:60090049-60124475    | 32.427  |
| Acyp1         | 0 | 0 | 0 | 236  | 3.933333 | 8.52389  | 16.69477 | Stalled      | chr12:86613347-86623385   | 8.039   |
| Rnaseh2b      | 0 | 0 | 0 | 930  | 15.5     | 10.4222  | 21.88298 | Unclassified | chr14:62948941-62991829   | 40.889  |
| Vldlr         | 0 | 0 | 0 | 38   | 0.633333 | 0.193199 | 2.092844 | Unclassified | chr19:27289509-27328721   | 37.213  |
| Prpmp5        | 0 | 0 | 0 | 0    | 0        | 0.029945 | 0        | Unclassified | chr6:132261607-132266761  | 3.155   |
| Slitrk4       | 0 | 0 | 0 | 1    | 0.016667 | 0.019542 | 0        | Unclassified | chrX:61522618-61532171    | 7.554   |
| E330016A19Rik | 0 | 0 | 0 | 32   | 0.533333 | 0.749666 | 4.874856 | Unclassified | chr9:78278324-78292954    | 12.631  |
| 2700050L05Rik | 0 | 0 | 0 | 718  | 11.96667 | 5.00159  | 27.44654 | Unclassified | chr7:140827388-140864653  | 35.266  |
| Vip           | 0 | 0 | 0 | 2    | 0.033333 | 0.016786 | 0        | Unclassified | chr10:4698926-4709323     | 8.398   |
| Smarca2       | 0 | 0 | 0 | 2234 | 37.23333 | 8.91824  | 10.91798 | Unclassified | chr19:26677649-26852811   | 173.163 |
| Ctsw          | 0 | 0 | 0 | 94   | 1.566667 | 0.332892 | 0.714512 | Unclassified | chr19:5465239-5470498     | 3.26    |
| Nox3          | 0 | 0 | 0 | 34   | 0.566667 | 0.03576  | 0        | Unclassified | chr17:3635239-3698261     | 61.023  |
| Yif1b         | 0 | 0 | 0 | 328  | 5.466667 | 23.665   | 11.74652 | Unclassified | chr7:30021341-3003251     | 9.211   |
| 2610301B20Rik | 0 | 0 | 0 | 247  | 4.116667 | 3.3247   | 20.0038  | Stalled      | chr4:10799644-10826570    | 24.927  |
| Tm7sf4        | 0 | 0 | 0 | 14   | 0.233333 | 0.019292 | 0.51859  | Unclassified | chr15:39575477-39592480   | 15.004  |
| Pde1b         | 0 | 0 | 0 | 326  | 5.433333 | 5.3141   | 6.779084 | Unclassified | chr15:103331728-103360483 | 26.756  |
| Galnt12       | 0 | 0 | 0 | 197  | 3.283333 | 6.65541  | 21.1427  | Stalled      | chr4:47102824-47135914    | 31.091  |
| Pde1c         | 0 | 0 | 0 | 156  | 2.6      | 0.14661  | 0.659918 | Unclassified | chr6:56019797-56321628    | 299.832 |
| Apol7a        | 0 | 0 | 0 | 9    | 0.15     | 0.016941 | 0        | Unclassified | chr15:77218647-77231540   | 10.894  |
| 2310003C23Rik | 0 | 0 | 0 | 112  | 1.866667 | 12.8472  | 0.909995 | Unclassified | chr2:180445250-180453222  | 5.973   |
| Olf1197       | 0 | 0 | 0 | 1    | 0.016667 | 0.036647 | 0        | Unclassified | chr2:88568809-88571754    | 0.946   |
| Car9          | 0 | 0 | 0 | 102  | 1.7      | 0.529743 | 0.285905 | Unclassified | chr4:43517897-43526597    | 6.701   |
| Pnma2         | 0 | 0 | 0 | 11   | 0.183333 | 0.059571 | 1.057556 | Unclassified | chr14:67528044-67538898   | 8.855   |
| Oxr1          | 0 | 0 | 0 | 396  | 6.6      | 5.48329  | 18.44726 | Stalled      | chr15:41618579-41692593   | 72.015  |
| Cyp4f13       | 0 | 0 | 0 | 387  | 6.45     | 3.2863   | 8.912577 | Unclassified | chr17:33061632-33086306   | 22.675  |
| Dcaf17        | 0 | 0 | 0 | 633  | 10.55    | 6.31184  | 82.88432 | Stalled      | chr2:70891800-70926701    | 32.902  |
| Snx16         | 0 | 0 | 0 | 149  | 2.483333 | 1.31294  | 22.602   | Stalled      | chr3:10417816-10442124    | 22.309  |
| Tas2r110      | 0 | 0 | 0 | 0    | 0        | 0        | 0        | Unclassified | chr6:132816025-132819027  | 1.003   |
| AI987944      | 0 | 0 | 0 | 152  | 2.533333 | 1.22047  | 21.25836 | Stalled      | chr7:48629157-48650630    | 19.474  |
| Atr           | 0 | 0 | 0 | 451  | 7.516667 | 1.91674  | 39.42209 | Stalled      | chr9:95756015-95852063    | 94.049  |
| S100a9        | 0 | 0 | 0 | 2    | 0.033333 | 0.393944 | 0        | Unclassified | chr3:90496554-90501613    | 3.06    |
| Gm4976        | 0 | 0 | 0 | 23   | 0.383333 | 0.019429 | 0.55081  | Unclassified | chr8:95544115-95574091    | 27.977  |
| Cldn16        | 0 | 0 | 0 | 15   | 0.25     | 0.044579 | 1.177449 | Unclassified | chr16:26461245-26482853   | 19.609  |
| Atp6v0b       | 0 | 0 | 0 | 222  | 3.7      | 53.288   | 9.718865 | Unclassified | chr4:117556934-117561934  | 3.001   |
| Foxp2         | 0 | 0 | 0 | 249  | 4.15     | 0.131636 | 2.751004 | Unclassified | chr6:14849348-15391977    | 540.63  |
| Ccdc13        | 0 | 0 | 0 | 25   | 0.416667 | 0        | 0.777469 | Unclassified | chr9:121726479-121742197  | 13.719  |
| Atp12a        | 0 | 0 | 0 | 28   | 0.466667 | 0.11029  | 1.977355 | Unclassified | chr14:56981904-57007388   | 23.485  |
| Olf1930       | 0 | 0 | 0 | 0    | 0        | 0.048373 | 0        | Unclassified | chr9:38735757-38738684    | 0.928   |
| Olf1511       | 0 | 0 | 0 | 3    | 0.05     | 0.080226 | 1        | Unclassified | chr14:53009489-53012446   | 0.958   |
| Asphd1        | 0 | 0 | 0 | 90   | 1.5      | 0        | 1.246596 | Elongating   | chr7:134089521-134095095  | 3.575   |
| Sic9a9        | 0 | 0 | 0 | 523  | 8.716667 | 3.23059  | 5.22225  | Unclassified | chr9:94568327-95129867    | 559.541 |
| 2810007J24Rik | 0 | 0 | 0 | 14   | 0.233333 | 0        | 0.743967 | Unclassified | chr7:14996067-15033935    | 35.869  |
| Olf1325       | 0 | 0 | 0 | 0    | 0        | 0.029355 | 0        | Unclassified | chr11:58392365-58395328   | 0.964   |
| Olf1117       | 0 | 0 | 0 | 2    | 0.033333 | 0        | 1        | Unclassified | chr17:37796322-37799276   | 0.955   |
| Sez6l2        | 0 | 0 | 0 | 94   | 1.566667 | 0.384224 | 2.302153 | Unclassified | chr7:134092242-134113783  | 19.542  |
| Olf11333      | 0 | 0 | 0 | 2    | 0.033333 | 0.009464 | 1        | Unclassified | chr4:118502089-118505043  | 0.955   |
| Olf1747       | 0 | 0 | 0 | 0    | 0        | 0        | 0        | Unclassified | chr14:51300365-51303320   | 0.956   |
| Olf1370       | 0 | 0 | 0 | 3    | 0.05     | 0        | 1        | Unclassified | chr8:86062991-86066086    | 1.096   |
| Dag1          | 0 | 0 | 0 | 387  | 6.45     | 4.10092  | 36.43915 | Stalled      | chr9:108108288-108168067  | 57.78   |
| Kctd13        | 0 | 0 | 0 | 409  | 6.816667 | 11.6891  | 18.18467 | Unclassified | chr7:134070392-134089123  | 16.732  |
| Pou6f1        | 0 | 0 | 0 | 61   | 1.016667 | 2.45082  | 1.871988 | Unclassified | chr15:100405748-100418796 | 11.049  |
| Emb           | 0 | 0 | 0 | 596  | 9.933333 | 10.8398  | 9.041757 | Unclassified | chr13:118007379-118063222 | 53.844  |
| Olf1346       | 0 | 0 | 0 | 1    | 0.016667 | 0        | 0        | Unclassified | chr2:36541523-36544453    | 0.931   |
| Olf1218       | 0 | 0 | 0 | 2    | 0.033333 | 0.054771 | 1        | Unclassified | chr2:88894645-88897581    | 0.937   |
| Aatf          | 0 | 0 | 0 | 1117 | 18.61667 | 17.7688  | 27.0313  | Unclassified | chr11:84236357-84329003   | 90.647  |
| Pr12a1        | 0 | 0 | 0 | 2    | 0.033333 | 0        | 0.858417 | Unclassified | chr13:27891523-27900585   | 7.063   |
| Mettl4        | 0 | 0 | 0 | 379  | 6.316667 | 3.40279  | 59.40747 | Stalled      | chr17:95126419-95151232   | 22.814  |
| Fgf21         | 0 | 0 | 0 | 23   | 0.383333 | 0.081202 | 0.322385 | Unclassified | chr7:52869259-52872860    | 1.602   |
| Apba2         | 0 | 0 | 0 | 242  | 4.033333 | 0.038615 | 1.026927 | Unclassified | chr7:71644591-71899762    | 252.172 |
| Apbb1         | 0 | 0 | 0 | 64   | 1.066667 | 0.909242 | 1.673788 | Unclassified | chr7:112706997-112732049  | 23.053  |
| Apbb2         | 0 | 0 | 0 | 809  | 13.48333 | 0.384909 | 10.77084 | Stalled      | chr5:66693126-67011910    | 316.785 |
| Atxn2l        | 0 | 0 | 0 | 1591 | 26.51667 | 51.2959  | 8.027757 | Unclassified | chr7:133635221-133648816  | 11.596  |
| Ap4s1         | 0 | 0 | 0 | 766  | 12.76667 | 12.0426  | 21.26474 | Unclassified | chr12:52789952-52839926   | 47.975  |
| Fbxw20        | 0 | 0 | 0 | 14   | 0.233333 | 0.043269 | 0        | Unclassified | chr9:109119945-109139238  | 17.294  |
| St18          | 0 | 0 | 0 | 78   | 1.3      | 0.037168 | 1.267903 | Unclassified | chr1:6718131-6851021      | 130.891 |
| Gm12794       | 0 | 0 | 0 | 4    | 0.066667 | 0.01323  | 0        | Unclassified | chr4:101611011-101615788  | 2.778   |
| Tufm          | 0 | 0 | 0 | 221  | 3.683333 | 38.5729  | 4.762192 | Unclassified | chr7:133628868-133634244  | 3.377   |
| 6030422M02Rik | 0 | 0 | 0 | 533  | 8.883333 | 0.060241 | 1.119936 | Elongating   | chr1:9896718-9931035      | 32.318  |
| Dub2a         | 0 | 0 | 0 | 0    | 0        | 0.044578 | 0        | Unclassified | chr7:110398599-110403019  | 2.421   |
| Nhs           | 0 | 0 | 0 | 118  | 1.966667 | 0.032975 | 0.735476 | Unclassified | chrX:158274199-158599722  | 323.524 |
| Impdh2        | 0 | 0 | 0 | 549  | 9.15     | 63.5979  | 4.324073 | Unclassified | chr9:108460831-108467897  | 5.067   |
| Insl5         | 0 | 0 | 0 | 5    | 0.083333 | 0.03742  | 0.723681 | Unclassified | chr4:102690477-102701333  | 8.857   |
| Apcdd1        | 0 | 0 | 0 | 40   | 0.666667 | 0.219787 | 3.379505 | Unclassified | chr18:63079980-63112849   | 30.87   |
| Ang           | 0 | 0 | 0 | 11   | 0.183333 | 0        | 0.385041 | Unclassified | chr14:51713674-51721682   | 6.009   |
| Zfyve9        | 0 | 0 | 0 | 96   | 1.6      | 0.230339 | 0        | Unclassified | chr4:108311863-108398481  | 84.619  |
| Slc9a3r2      | 0 | 0 | 0 | 34   | 0.566667 | 0.604946 | 1.318212 | Unclassified | chr17:24776226-24789250   | 11.025  |
| Fstl5         | 0 | 0 | 0 | 229  | 3.816667 | 0.029587 | 3.695261 | Unclassified | chr3:75876519-76513927    | 635.409 |
| Syn3          | 0 | 0 | 0 | 826  | 13.76667 | 0.30327  | 13.46558 | Stalled      | chr10:85511492-85963641   | 450.15  |
| Podxl         | 0 | 0 | 0 | 152  | 2.533333 | 0.153825 | 1.622451 | Unclassified | chr6:31469492-31515937    | 44.446  |
| Nrk           | 0 | 0 | 0 | 18   | 0.3      | 0.054372 | 0        | Unclassified | chrX:135446968-135543627  | 94.66   |
| Klhdc10       | 0 | 0 | 0 | 259  | 4.316667 | 3.4716   | 22.77295 | Stalled      | chr6:30349908-30405174    | 53.267  |
| Cab39l        | 0 | 0 | 0 | 763  | 12.71667 | 4.77217  | 87.41483 | Stalled      | chr14:60057817-60167740   | 107.924 |
| Oog2          | 0 | 0 | 0 | 2    | 0.033333 | 0.01599  | 1        | Unclassified | chr4:143778619-143786837  | 6.219   |

|               |   |   |   |      |          |          |          |              |                           |          |
|---------------|---|---|---|------|----------|----------|----------|--------------|---------------------------|----------|
| Uba5          | 0 | 0 | 0 | 372  | 6.2      | 12.6257  | 7.363058 | Unclassified | chr9:103948917-103967451  | 16.535   |
| Tspan17       | 0 | 0 | 0 | 32   | 0.533333 | 1.50563  | 4.272915 | Unclassified | chr13:54888765-54898129   | 7.365    |
| Camsap111     | 0 | 0 | 0 | 461  | 7.683333 | 2.9288   | 30.29659 | Stalled      | chr1:138164699-138244681  | 77.983   |
| Smu1          | 0 | 0 | 0 | 496  | 8.266667 | 13.1601  | 9.762409 | Unclassified | chr4:40682682-40706918    | 22.237   |
| Gpn1          | 0 | 0 | 0 | 389  | 6.483333 | 10.6213  | 7.817697 | Unclassified | chr5:31795133-31814000    | 16.868   |
| Ppp4r4        | 0 | 0 | 0 | 66   | 1.1      | 0.125275 | 9.386796 | Unclassified | chr12:104768774-104852042 | 81.269   |
| Armc1         | 0 | 0 | 0 | 447  | 7.45     | 7.69218  | 25.25513 | Unclassified | chr3:19032143-19065065    | 30.923   |
| Morc2a        | 0 | 0 | 0 | 591  | 9.85     | 8.67205  | 33.71273 | Unclassified | chr11:3547496-3590375     | 40.88    |
| Mfn1          | 0 | 0 | 0 | 343  | 5.716667 | 4.91937  | 19.6221  | Stalled      | chr3:32426403-32478147    | 49.745   |
| Gm14203       | 0 | 0 | 0 | 50   | 0.833333 | 0.044282 | 1.350279 | Unclassified | chr2:158336531-158376362  | 37.832   |
| Fxyd2         | 0 | 0 | 0 | 37   | 0.616667 | 0.343929 | 1.019645 | Unclassified | chr9:45209220-45218361    | 7.142    |
| Tmem165       | 0 | 0 | 0 | 752  | 12.53333 | 20.6763  | 13.90523 | Unclassified | chr5:76610904-76638269    | 25.366   |
| Mier1         | 0 | 0 | 0 | 1197 | 19.95    | 6.55382  | 14.61038 | Unclassified | chr4:102785069-102838354  | 51.286   |
| Tpbpa         | 0 | 0 | 0 | 4    | 0.066667 | 0        | 0.528857 | Unclassified | chr13:61040052-61045296   | 3.245    |
| Tpd5211       | 0 | 0 | 0 | 72   | 1.2      | 0.101155 | 3.782047 | Unclassified | chr10:31052185-31167727   | 113.543  |
| Acsm1         | 0 | 0 | 0 | 32   | 0.533333 | 0.012596 | 0.58494  | Unclassified | chr7:126759341-126806028  | 44.688   |
| Nlrp4b        | 0 | 0 | 0 | 17   | 0.283333 | 0.011744 | 0        | Unclassified | chr7:11271141-11315507    | 42.367   |
| Adcy2         | 0 | 0 | 0 | 271  | 4.516667 | 0.054784 | 0.583655 | Unclassified | chr13:68758919-69140419   | 379.501  |
| Tdrd6         | 0 | 0 | 0 | 27   | 0.45     | 0.0764   | 0.798833 | Unclassified | chr17:43752283-43769248   | 14.966   |
| Kcnn2         | 0 | 0 | 0 | 75   | 1.25     | 0.081433 | 2.588707 | Unclassified | chr18:45717807-45845537   | 125.731  |
| Kcnn3         | 0 | 0 | 0 | 197  | 3.283333 | 0.141338 | 0.436956 | Unclassified | chr3:89322085-89476416    | 152.332  |
| Zfp800        | 0 | 0 | 0 | 596  | 9.933333 | 2.81699  | 41.30159 | Unclassified | chr6:28189930-28213601    | 21.672   |
| Ppp1r3a       | 0 | 0 | 0 | 13   | 0.216667 | 0.0126   | 1.572434 | Unclassified | chr6:14663821-14707274    | 41.454   |
| Cnga2         | 0 | 0 | 0 | 8    | 0.133333 | 0.008437 | 0        | Unclassified | chrX:69235213-69255557    | 18.345   |
| Cnga1         | 0 | 0 | 0 | 34   | 0.566667 | 0.042128 | 0.543229 | Unclassified | chr5:72994935-73035991    | 39.057   |
| Sh3bp4        | 0 | 0 | 0 | 154  | 2.566667 | 0.300083 | 5.641096 | Unclassified | chr1:90965036-91050368    | 83.333   |
| Ckap5         | 0 | 0 | 0 | 525  | 8.75     | 8.99712  | 0.881623 | Unclassified | chr2:91384478-91460821    | 74.344   |
| Ears2         | 0 | 0 | 0 | 569  | 9.483333 | 4.10934  | 36.08651 | Unclassified | chr7:129182334-129212577  | 28.244   |
| Klhl24        | 0 | 0 | 0 | 213  | 3.55     | 2.18581  | 24.41136 | Stalled      | chr16:20095626-20127817   | 30.192   |
| Abcc2         | 0 | 0 | 0 | 72   | 1.2      | 0.064212 | 0        | Unclassified | chr19:43854797-43912708   | 55.912   |
| Hmxo2         | 0 | 0 | 0 | 524  | 8.733333 | 30.5827  | 34.2723  | Unclassified | chr16:4724360-4766248     | 39.889   |
| Adrbk2        | 0 | 0 | 0 | 167  | 2.783333 | 0.221491 | 3.18844  | Unclassified | chr5:113339497-113446534  | 105.038  |
| Csmid1        | 0 | 0 | 0 | 864  | 14.4     | 0.017928 | 2.627113 | Unclassified | chr8:15892544-17537385    | 1642.842 |
| Zc3h11a       | 0 | 0 | 0 | 827  | 13.78333 | 17.1411  | 8.084748 | Unclassified | chr1:135516447-135559957  | 41.511   |
| Cpm           | 0 | 0 | 0 | 572  | 9.533333 | 1.57364  | 21.96194 | Unclassified | chr10:117064555-117124408 | 57.854   |
| Gfod2         | 0 | 0 | 0 | 167  | 2.783333 | 2.78145  | 18.47577 | Stalled      | chr8:108240012-108284507  | 42.496   |
| Ipo5          | 0 | 0 | 0 | 1252 | 20.86667 | 28.8285  | 10.07284 | Unclassified | chr14:121308415-121347266 | 36.852   |
| Fgg           | 0 | 0 | 0 | 9    | 0.15     | 0.033661 | 1.212211 | Unclassified | chr3:82809817-82818971    | 7.155    |
| Tcerg11       | 0 | 0 | 0 | 151  | 2.516667 | 0.024944 | 1.118418 | Unclassified | chr7:145400654-145591413  | 188.76   |
| Itgb2l        | 0 | 0 | 0 | 41   | 0.683333 | 0.022024 | 0.708957 | Unclassified | chr16:96643904-96667221   | 21.318   |
| Itgb2         | 0 | 0 | 0 | 968  | 16.13333 | 33.1509  | 7.30448  | Unclassified | chr10:76991092-77028419   | 35.328   |
| Itgav         | 0 | 0 | 0 | 867  | 14.45    | 2.21262  | 30.01719 | Unclassified | chr2:83562553-83647073    | 82.521   |
| Itgb1         | 0 | 0 | 0 | 622  | 10.36667 | 14.4465  | 12.47619 | Unclassified | chr8:131207553-131257479  | 47.927   |
| Olfir923      | 0 | 0 | 0 | 0    | 0        | 0        | 0        | Unclassified | chr9:38633277-38636231    | 0.955    |
| Dach2         | 0 | 0 | 0 | 121  | 2.016667 | 0.867226 | 11.72902 | Unclassified | chrX:110409864-110949995  | 538.132  |
| Fshr          | 0 | 0 | 0 | 127  | 2.116667 | 0        | 0        | Unclassified | chr17:89384291-89602015   | 215.725  |
| Loxl1         | 0 | 0 | 0 | 78   | 1.3      | 0.191976 | 0.512949 | Unclassified | chr9:58135529-58163019    | 25.491   |
| Lox           | 0 | 0 | 0 | 10   | 0.166667 | 0.149358 | 2.785818 | Unclassified | chr18:52676891-52691362   | 12.472   |
| Fshb          | 0 | 0 | 0 | 0    | 0        | 0.016081 | 0        | Unclassified | chr2:106896297-106901808  | 3.512    |
| Olfir50       | 0 | 0 | 0 | 1    | 0.016667 | 0        | 0        | Unclassified | chr2:36646757-36649696    | 0.94     |
| Pard3b        | 0 | 0 | 0 | 838  | 13.96667 | 0.535838 | 8.820306 | Unclassified | chr1:61683397-62688858    | 1003.462 |
| C1qa          | 0 | 0 | 0 | 5    | 0.083333 | 0.177675 | 1.976109 | Unclassified | chr4:136451830-136456759  | 2.93     |
| Serping1      | 0 | 0 | 0 | 14   | 0.233333 | 0.091545 | 0.475644 | Unclassified | chr2:84605516-84617586    | 10.071   |
| Stc1          | 0 | 0 | 0 | 7    | 0.116667 | 0.234545 | 1.57489  | Unclassified | chr14:69645345-69659458   | 12.114   |
| Stc2          | 0 | 0 | 0 | 20   | 0.333333 | 0.629022 | 0.722861 | Unclassified | chr11:31259440-31272061   | 10.622   |
| Stat5b        | 0 | 0 | 0 | 1150 | 19.16667 | 16.7345  | 9.17771  | Unclassified | chr11:100642044-100713899 | 69.856   |
| Gm6084        | 0 | 0 | 0 | 3    | 0.05     | 0        | 0        | Unclassified | chr17:40862068-40868731   | 4.664    |
| Med26         | 0 | 0 | 0 | 1393 | 23.21667 | 5.86448  | 11.14377 | Unclassified | chr8:75018459-75074209    | 53.751   |
| Gm4696        | 0 | 0 | 0 | 12   | 0.2      | 0        | 1.266504 | Unclassified | chr6:128656525-128675064  | 16.54    |
| Arl16         | 0 | 0 | 0 | 398  | 6.633333 | 7.17188  | 11.84875 | Unclassified | chr11:120325639-120330914 | 3.276    |
| Rabep2        | 0 | 0 | 0 | 717  | 11.95    | 42.5877  | 9.566666 | Unclassified | chr7:133570280-133589421  | 17.142   |
| Hdac8         | 0 | 0 | 0 | 391  | 6.516667 | 6.16945  | 15.13835 | Stalled      | chrX:99479978-99702487    | 220.51   |
| Zeb2          | 0 | 0 | 0 | 4187 | 69.78333 | 4.82603  | 3.647677 | Unclassified | chr2:44839153-44970799    | 129.647  |
| Zfp68         | 0 | 0 | 0 | 418  | 6.966667 | 4.48808  | 13.79548 | Unclassified | chr5:139044879-139062971  | 16.093   |
| Tcn2          | 0 | 0 | 0 | 60   | 1        | 3.11869  | 4.407874 | Unclassified | chr11:3817080-3834081     | 15.002   |
| Ldb3          | 0 | 0 | 0 | 96   | 1.6      | 0.057888 | 0        | Unclassified | chr14:35339884-35403867   | 61.984   |
| Atp6v1g1      | 0 | 0 | 0 | 171  | 2.85     | 15.4023  | 7.754809 | Unclassified | chr4:63203798-63211734    | 5.937    |
| Fam164b       | 0 | 0 | 0 | 132  | 2.2      | 0        | 5.027067 | Unclassified | chr10:12869449-12899829   | 28.381   |
| Sec22b        | 0 | 0 | 0 | 374  | 6.233333 | 23.0104  | 13.82468 | Unclassified | chr3:97703149-97726241    | 21.093   |
| Snai2         | 0 | 0 | 0 | 6    | 0.1      | 0.10197  | 1.674033 | Unclassified | chr16:14703951-14709475   | 3.525    |
| Zc3hav1l      | 0 | 0 | 0 | 145  | 2.416667 | 1.43078  | 17.73308 | Stalled      | chr6:38241871-38251259    | 7.389    |
| Hltf          | 0 | 0 | 0 | 476  | 7.933333 | 4.10755  | 40.40159 | Stalled      | chr3:19955810-20018376    | 60.567   |
| Smarcc1       | 0 | 0 | 0 | 1346 | 22.43333 | 11.6943  | 42.48107 | Unclassified | chr9:110032527-110142682  | 108.156  |
| Nbl1          | 0 | 0 | 0 | 39   | 0.65     | 0.508758 | 0.443223 | Unclassified | chr4:138638206-138650885  | 10.68    |
| Usp6nl        | 0 | 0 | 0 | 1433 | 23.88333 | 4.70601  | 18.28591 | Unclassified | chr2:6241802-6364866      | 121.065  |
| Krt13         | 0 | 0 | 0 | 6    | 0.1      | 0.029261 | 1.474835 | Unclassified | chr11:99978909-99984809   | 3.901    |
| Sele          | 0 | 0 | 0 | 16   | 0.266667 | 0.074821 | 1.302906 | Unclassified | chr1:165976364-165987808  | 9.445    |
| D630042P16Rik | 0 | 0 | 0 | 45   | 0.75     | 0        | 0.391805 | Unclassified | chr6:112309317-112340017  | 28.701   |
| Myo1a         | 0 | 0 | 0 | 30   | 0.5      | 0.107026 | 0.352301 | Unclassified | chr10:127140311-127157996 | 15.686   |
| Krt31         | 0 | 0 | 0 | 8    | 0.133333 | 0.024319 | 0        | Unclassified | chr11:99907959-99913865   | 3.907    |
| Slc6a11       | 0 | 0 | 0 | 155  | 2.583333 | 0.053585 | 0.875848 | Unclassified | chr6:114079234-114199880  | 118.647  |
| Smok3b        | 0 | 0 | 0 | 0    | 0        | 0.028752 | 0        | Unclassified | chr5:138476451-138491861  | 13.411   |
| Rad52         | 0 | 0 | 0 | 596  | 9.933333 | 3.81982  | 10.11382 | Unclassified | chr6:119850715-119872840  | 20.126   |
| Mrps21        | 0 | 0 | 0 | 364  | 6.066667 | 73.7518  | 1.515409 | Elongating   | chr3:95666574-95676542    | 7.969    |
| Naa15         | 0 | 0 | 0 | 1    | 0.016667 | 0.266    | 0        | Unclassified | chr8:70012656-70016002    | 1.347    |
| Ripply1       | 0 | 0 | 0 | 3    | 0.05     | 0.066041 | 0        | Unclassified | chrX:136314219-136318892  | 2.674    |



|                      |   |   |   |      |          |          |          |              |                           |         |
|----------------------|---|---|---|------|----------|----------|----------|--------------|---------------------------|---------|
| <b>2410016006Rik</b> | 0 | 0 | 0 | 314  | 5.233333 | 13.9824  | 6.267603 | Unclassified | chr12:85289557-85293903   | 2.347   |
| <b>Rnf135</b>        | 0 | 0 | 0 | 285  | 4.75     | 10.3005  | 28.03019 | Stalled      | chr11:79995373-80013255   | 15.883  |
| <b>Krt17</b>         | 0 | 0 | 0 | 9    | 0.15     | 0.016964 | 1.290403 | Unclassified | chr11:100117530-100124303 | 4.774   |
| <b>Gm4937</b>        | 0 | 0 | 0 | 1    | 0.016667 | 0        | 0        | Unclassified | chrX:73507644-73513012    | 3.369   |
| <b>Slc44a2</b>       | 0 | 0 | 0 | 433  | 7.216667 | 19.4702  | 1.646603 | Elongating   | chr9:21140295-21159472    | 17.178  |
| <b>Krt14</b>         | 0 | 0 | 0 | 13   | 0.216667 | 0.011572 | 0.323671 | Unclassified | chr11:100064475-100070824 | 4.35    |
| <b>Klk5</b>          | 0 | 0 | 0 | 11   | 0.183333 | 0.041376 | 0        | Unclassified | chr7:51095638-51106551    | 8.914   |
| <b>Trpm4</b>         | 0 | 0 | 0 | 189  | 3.15     | 1.30713  | 18.57099 | Stalled      | chr7:52558524-52591150    | 30.627  |
| <b>Svop</b>          | 0 | 0 | 0 | 105  | 1.75     | 0.056206 | 0.762532 | Unclassified | chr5:114476921-114543389  | 64.469  |
| <b>Gpr31c</b>        | 0 | 0 | 0 | 1    | 0.016667 | 0.193752 | 1        | Unclassified | chr17:13244186-13247146   | 0.961   |
| <b>Scgb3a1</b>       | 0 | 0 | 0 | 13   | 0.216667 | 0.150024 | 1.350993 | Unclassified | chr11:49475111-49478620   | 1.51    |
| <b>Tas2r117</b>      | 0 | 0 | 0 | 0    | 0        | 0        | 0        | Unclassified | chr6:132750918-132753911  | 0.994   |
| <b>Tas2r123</b>      | 0 | 0 | 0 | 0    | 0        | 0.038372 | 0        | Unclassified | chr6:132795159-132798161  | 1.003   |
| <b>Cyp8b1</b>        | 0 | 0 | 0 | 21   | 0.35     | 0.696492 | 0.317726 | Unclassified | chr9:121823474-121827423  | 1.95    |
| <b>Oifr1346</b>      | 0 | 0 | 0 | 2    | 0.033333 | 0.027211 | 0        | Unclassified | chr7:6424822-6427764      | 0.943   |
| <b>Cyp7a1</b>        | 0 | 0 | 0 | 7    | 0.116667 | 0.018432 | 0        | Unclassified | chr4:6192758-6204778      | 10.021  |
| <b>Cyp7b1</b>        | 0 | 0 | 0 | 84   | 1.4      | 0.165677 | 3.416135 | Unclassified | chr3:17971949-18145338    | 171.39  |
| <b>Cyp4b1</b>        | 0 | 0 | 0 | 11   | 0.183333 | 0.044484 | 0        | Unclassified | chr4:115297332-115322310  | 22.979  |
| <b>Gbp10</b>         | 0 | 0 | 0 | 15   | 0.25     | 0.88898  | 5.742635 | Unclassified | chr5:105644717-105670552  | 23.836  |
| <b>Agxt2</b>         | 0 | 0 | 0 | 34   | 0.566667 | 0.077249 | 0        | Unclassified | chr15:10286333-10339493   | 51.161  |
| <b>Lca5l</b>         | 0 | 0 | 0 | 144  | 2.4      | 0.957968 | 14.40766 | Stalled      | chr16:96380012-96415864   | 33.853  |
| <b>Gm13084</b>       | 0 | 0 | 0 | 4    | 0.066667 | 0.024068 | 0.836173 | Unclassified | chr4:143399893-143407996  | 6.104   |
| <b>Gria2</b>         | 0 | 0 | 0 | 61   | 1.016667 | 0.056204 | 2.016433 | Unclassified | chr3:80488857-80608713    | 117.857 |
| <b>Pcgf6</b>         | 0 | 0 | 0 | 450  | 7.5      | 6.87967  | 26.62415 | Unclassified | chr19:47108108-47127335   | 17.228  |
| <b>Mto1</b>          | 0 | 0 | 0 | 624  | 10.4     | 5.88108  | 13.05891 | Unclassified | chr9:78294016-78321959    | 25.944  |
| <b>Cited4</b>        | 0 | 0 | 0 | 11   | 0.183333 | 3.42284  | 1.440032 | Unclassified | chr4:120337167-120340425  | 1.259   |
| <b>Tyms</b>          | 0 | 0 | 0 | 523  | 8.716667 | 11.0841  | 8.062602 | Unclassified | chr5:30385366-30402121    | 14.756  |
| <b>Xkr8</b>          | 0 | 0 | 0 | 143  | 2.383333 | 2.85975  | 3.760326 | Unclassified | chr4:132280818-132290461  | 7.644   |
| <b>Oifr30</b>        | 0 | 0 | 0 | 2    | 0.033333 | 0.027039 | 1        | Unclassified | chr11:58268416-58271482   | 1.067   |
| <b>Oifr3</b>         | 0 | 0 | 0 | 2    | 0.033333 | 0.040816 | 1        | Unclassified | chr2:36667668-36670610    | 0.943   |
| <b>Tspan10</b>       | 0 | 0 | 0 | 9    | 0.15     | 0.055885 | 0.761865 | Unclassified | chr11:120301944-120308635 | 4.692   |
| <b>C030046E11Rik</b> | 0 | 0 | 0 | 858  | 14.3     | 5.51179  | 27.27743 | Unclassified | chr19:29594771-29680411   | 83.641  |
| <b>Diap2</b>         | 0 | 0 | 0 | 709  | 11.81667 | 1.70089  | 45.22951 | Stalled      | chrX:126282277-126995733  | 711.457 |
| <b>Ftcd</b>          | 0 | 0 | 0 | 20   | 0.333333 | 0.028376 | 0.44611  | Unclassified | chr10:76036392-76053083   | 14.692  |
| <b>Etnk2</b>         | 0 | 0 | 0 | 49   | 0.816667 | 1.50136  | 3.34753  | Unclassified | chr1:135258148-135276895  | 16.748  |
| <b>Fst</b>           | 0 | 0 | 0 | 4    | 0.066667 | 0.208396 | 0        | Unclassified | chr13:115242469-115250938 | 6.47    |
| <b>Sdpr</b>          | 0 | 0 | 0 | 8    | 0.133333 | 0.130051 | 0.681461 | Unclassified | chr1:51343969-51359804    | 13.836  |
| <b>Pdgd</b>          | 0 | 0 | 0 | 85   | 1.416667 | 0.09996  | 0        | Unclassified | chr9:6166611-6377519      | 208.909 |
| <b>Agpat6</b>        | 0 | 0 | 0 | 902  | 15.03333 | 21.5802  | 13.70627 | Unclassified | chr8:24283417-24320925    | 35.509  |
| <b>Npnt</b>          | 0 | 0 | 0 | 870  | 14.5     | 19.2139  | 28.73083 | Unclassified | chr9:58428046-58500686    | 70.641  |
| <b>Frrs1</b>         | 0 | 0 | 0 | 197  | 3.283333 | 0.75959  | 9.622642 | Unclassified | chr3:116562597-116606668  | 42.072  |
| <b>Pus7</b>          | 0 | 0 | 0 | 721  | 12.01667 | 6.50805  | 11.981   | Unclassified | chr5:23246513-23291479    | 42.967  |
| <b>Naip5</b>         | 0 | 0 | 0 | 36   | 0.6      | 0.525981 | 10.32815 | Unclassified | chr13:100981694-101019291 | 35.598  |
| <b>Napb</b>          | 0 | 0 | 0 | 62   | 1.033333 | 0.915906 | 5.204743 | Unclassified | chr2:148520392-148560156  | 37.765  |
| <b>Nap114</b>        | 0 | 0 | 0 | 1479 | 24.65    | 47.2167  | 15.80092 | Unclassified | chr7:150699483-150736995  | 35.513  |
| <b>Nap112</b>        | 0 | 0 | 0 | 1    | 0.016667 | 0.13265  | 0        | Unclassified | chrX:100379397-100384003  | 2.607   |
| <b>Slc6a1</b>        | 0 | 0 | 0 | 46   | 0.766667 | 0.053642 | 0.881534 | Unclassified | chr6:114230628-114267518  | 34.891  |
| <b>Trim62</b>        | 0 | 0 | 0 | 122  | 2.033333 | 1.11779  | 3.898798 | Unclassified | chr4:128559383-128588570  | 27.188  |
| <b>Atg12</b>         | 0 | 0 | 0 | 201  | 3.35     | 4.97727  | 24.0696  | Stalled      | chr18:46892070-46903233   | 9.164   |
| <b>Nudt7</b>         | 0 | 0 | 0 | 163  | 2.716667 | 2.85911  | 25.67875 | Stalled      | chr8:116655478-116676205  | 18.728  |
| <b>Wdr72</b>         | 0 | 0 | 0 | 108  | 1.8      | 0.017193 | 2.492049 | Unclassified | chr9:73956140-74131010    | 172.871 |
| <b>Oifr211</b>       | 0 | 0 | 0 | 2    | 0.033333 | 0        | 1        | Unclassified | chr6:116441628-116444558  | 0.931   |
| <b>Cnot3</b>         | 0 | 0 | 0 | 1025 | 17.08333 | 23.7446  | 5.056215 | Unclassified | chr7:3594954-3612702      | 15.749  |
| <b>Aldh8a1</b>       | 0 | 0 | 0 | 35   | 0.583333 | 0.108406 | 0.386633 | Unclassified | chr10:21095105-21116384   | 19.228  |
| <b>Tbd1d15</b>       | 0 | 0 | 0 | 784  | 13.06667 | 6.27023  | 16.58327 | Unclassified | chr10:114634926-114690549 | 53.624  |
| <b>Uqcrrs1</b>       | 0 | 0 | 0 | 343  | 5.716667 | 51.9911  | 19.33731 | Unclassified | chr13:30632180-30639185   | 5.006   |
| <b>Aspn</b>          | 0 | 0 | 0 | 53   | 0.883333 | 0        | 0        | Unclassified | chr13:49637909-49662931   | 23.023  |
| <b>Snx31</b>         | 0 | 0 | 0 | 67   | 1.116667 | 0.071334 | 1.334978 | Unclassified | chr15:36433816-36487327   | 51.512  |
| <b>Oifr834</b>       | 0 | 0 | 0 | 2    | 0.033333 | 0.027298 | 2        | Unclassified | chr9:18790433-18793372    | 0.94    |
| <b>Oifr832</b>       | 0 | 0 | 0 | 0    | 0        | 0        | 0        | Unclassified | chr9:18747093-18750032    | 0.94    |
| <b>3110001D03Rik</b> | 0 | 0 | 0 | 111  | 1.85     | 45.4513  | 104      | Unclassified | chr4:74923257-74926190    | 0.934   |
| <b>Ckm</b>           | 0 | 0 | 0 | 38   | 0.633333 | 1.4492   | 0.213324 | Unclassified | chr7:19994442-20006932    | 10.491  |
| <b>Abcg4</b>         | 0 | 0 | 0 | 50   | 0.833333 | 0.506984 | 2.871436 | Unclassified | chr9:44081272-44098327    | 15.056  |
| <b>Sec11a</b>        | 0 | 0 | 0 | 680  | 11.33333 | 41.9774  | 23.84636 | Unclassified | chr7:88060264-88094436    | 32.173  |
| <b>Mn1</b>           | 0 | 0 | 0 | 77   | 1.283333 | 0.078426 | 1.430593 | Unclassified | chr5:111845185-111886045  | 38.861  |
| <b>Klhl36</b>        | 0 | 0 | 0 | 219  | 3.65     | 4.25333  | 9.919991 | Unclassified | chr8:122384204-122400889  | 14.686  |
| <b>Raver1</b>        | 0 | 0 | 0 | 1413 | 23.55    | 32.2791  | 7.338412 | Unclassified | chr9:20878608-20898432    | 17.825  |
| <b>Nxf3</b>          | 0 | 0 | 0 | 3    | 0.05     | 0.012911 | 0        | Unclassified | chrX:132606637-132621794  | 13.158  |
| <b>Gira3</b>         | 0 | 0 | 0 | 55   | 0.916667 | 0        | 0.772659 | Unclassified | chr8:58417621-58604149    | 184.529 |
| <b>Kir3dl1</b>       | 0 | 0 | 0 | 3    | 0.05     | 0        | 0        | Unclassified | chrX:133050537-133068847  | 16.311  |
| <b>Pgm1</b>          | 0 | 0 | 0 | 260  | 4.333333 | 7.17303  | 24.28723 | Stalled      | chr5:64482188-64519397    | 35.21   |
| <b>Kir3dl2</b>       | 0 | 0 | 0 | 1    | 0.016667 | 0        | 0        | Unclassified | chrX:132982645-133005580  | 20.936  |
| <b>Ubr3</b>          | 0 | 0 | 0 | 924  | 15.4     | 5.48003  | 16.37236 | Unclassified | chr2:69733302-69862070    | 126.769 |
| <b>Pkdcc</b>         | 0 | 0 | 0 | 32   | 0.533333 | 0.214128 | 1.312229 | Unclassified | chr17:83612622-83624409   | 9.788   |
| <b>Rhod3</b>         | 0 | 0 | 0 | 379  | 6.316667 | 0.104256 | 1.064219 | Unclassified | chr18:24865945-25292002   | 424.058 |
| <b>Reep2</b>         | 0 | 0 | 0 | 191  | 3.183333 | 0.381232 | 5.415984 | Unclassified | chr18:34998311-35007109   | 6.799   |
| <b>Cox8a</b>         | 0 | 0 | 0 | 319  | 5.316667 | 174.211  | 5.011686 | Unclassified | chr19:7289647-7294106     | 2.46    |
| <b>Cd34</b>          | 0 | 0 | 0 | 15   | 0.25     | 0.124784 | 0.641502 | Unclassified | chr1:196763014-196787486  | 22.473  |
| <b>1110067D22Rik</b> | 0 | 0 | 0 | 98   | 1.633333 | 0.59955  | 9.586505 | Unclassified | chr11:20723357-20733111   | 7.755   |
| <b>Hsfy2</b>         | 0 | 0 | 0 | 2    | 0.033333 | 0.045675 | 1        | Unclassified | chr1:56692892-56696295    | 1.404   |
| <b>Faim</b>          | 0 | 0 | 0 | 237  | 3.95     | 11.4962  | 29.06631 | Stalled      | chr9:98884791-98902438    | 15.648  |
| <b>I128ra</b>        | 0 | 0 | 0 | 77   | 1.283333 | 0.258948 | 2.150606 | Unclassified | chr4:135240371-135264093  | 21.723  |
| <b>Eef1a2</b>        | 0 | 0 | 0 | 23   | 0.383333 | 0.352077 | 0.29391  | Unclassified | chr2:180882396-180893720  | 9.325   |
| <b>Myom3</b>         | 0 | 0 | 0 | 123  | 2.05     | 0.200004 | 0.315506 | Unclassified | chr4:135313629-135371479  | 55.851  |
| <b>Tmem167</b>       | 0 | 0 | 0 | 560  | 9.333333 | 2.06336  | 16.79084 | Unclassified | chr13:90227271-90254526   | 25.256  |
| <b>Rprd1a</b>        | 0 | 0 | 0 | 461  | 7.683333 | 4.49566  | 22.64792 | Unclassified | chr18:24643462-24690705   | 45.244  |

|               |   |          |   |      |          |          |          |              |                           |         |
|---------------|---|----------|---|------|----------|----------|----------|--------------|---------------------------|---------|
| Sdhaf2        | 0 | 0        | 0 | 674  | 11.23333 | 8.28753  | 33.59582 | Unclassified | chr19:10575002-10601699   | 24.698  |
| H2afz         | 0 | 0        | 0 | 583  | 9.716667 | 87.9626  | 8.521723 | Unclassified | chr3:137525562-137529886  | 2.325   |
| Sobp          | 0 | 0        | 0 | 156  | 2.6      | 0.527437 | 1.593307 | Unclassified | chr10:42722305-42896336   | 172.032 |
| Aoah          | 0 | 0        | 0 | 170  | 2.833333 | 0.109917 | 0        | Unclassified | chr13:20883987-21116121   | 230.135 |
| Fkbp9         | 0 | 0        | 0 | 74   | 1.233333 | 0.297955 | 1.20473  | Unclassified | chr6:56780052-56829354    | 47.303  |
| Sec23b        | 0 | 0        | 0 | 603  | 10.05    | 16.0367  | 21.01348 | Unclassified | chr2:144380012-144416479  | 34.468  |
| Sh3d19        | 0 | 0        | 0 | 126  | 2.1      | 0.517241 | 0.274784 | Unclassified | chr3:85886355-85934443    | 46.089  |
| Grik1         | 0 | 0        | 0 | 249  | 4.15     | 0.049024 | 1.232412 | Unclassified | chr16:87896141-88292503   | 394.363 |
| Vwce          | 0 | 0        | 0 | 98   | 1.633333 | 0.152058 | 4.115612 | Unclassified | chr19:10706722-10739700   | 30.979  |
| Pabpn1l       | 0 | 0        | 0 | 24   | 0.4      | 0.033609 | 1.187475 | Unclassified | chr8:125143370-125148635  | 3.266   |
| Cpsf2         | 0 | 0        | 0 | 894  | 14.9     | 10.2895  | 41.38079 | Unclassified | chr12:103212183-103244203 | 30.021  |
| Ccdc117       | 0 | 3.991561 | 0 | 412  | 6.866667 | 13.2064  | 5.347374 | Unclassified | chr11:5428890-5444220     | 13.331  |
| Cbx4          | 0 | 0        | 0 | 1262 | 21.03333 | 21.5328  | 2.639365 | Elongating   | chr11:118938884-118949551 | 8.668   |
| Nr4a1         | 0 | 0        | 0 | 121  | 2.016667 | 2.90045  | 6.954129 | Unclassified | chr15:101095276-101105223 | 7.948   |
| Rnase13       | 0 | 0        | 0 | 4    | 0.066667 | 0.125241 | 2        | Unclassified | chr14:52541834-52544448   | 0.615   |
| Cbx1          | 0 | 0        | 0 | 498  | 8.3      | 33.5091  | 18.3943  | Unclassified | chr11:96648449-96669954   | 19.506  |
| Foxa1         | 0 | 0        | 0 | 19   | 0.316667 | 0.146778 | 0        | Unclassified | chr12:58641618-58649108   | 5.491   |
| Foxa3         | 0 | 0        | 0 | 95   | 1.583333 | 0.177289 | 2.565761 | Unclassified | chr7:19598631-19610888    | 10.258  |
| Cbx2          | 0 | 0        | 0 | 89   | 1.483333 | 3.24286  | 6.054694 | Unclassified | chr11:118882342-118892584 | 8.243   |
| Hs6st3        | 0 | 0        | 0 | 404  | 6.733333 | 0.218985 | 0.645049 | Unclassified | chr14:119535486-120269037 | 731.552 |
| Hs6st2        | 0 | 0        | 0 | 84   | 1.4      | 0.038692 | 1.563123 | Unclassified | chrX:48740388-49036779    | 294.392 |
| Hs6st1        | 0 | 0        | 0 | 652  | 10.86667 | 14.6877  | 9.729354 | Unclassified | chr1:36123244-36163290    | 38.047  |
| Ppap2c        | 0 | 0        | 0 | 35   | 0.583333 | 3.48763  | 4.17734  | Unclassified | chr10:78989173-78998532   | 7.36    |
| Rgs11         | 0 | 0        | 0 | 25   | 0.416667 | 2.21663  | 2.662053 | Unclassified | chr17:26337906-26348269   | 8.364   |
| Zfp808        | 0 | 0        | 0 | 59   | 0.983333 | 1.66656  | 25.94569 | Stalled      | chr13:62229249-62275296   | 44.048  |
| Impg1         | 0 | 0        | 0 | 91   | 1.516667 | 0.10044  | 1.382261 | Unclassified | chr9:80161136-80361045    | 197.91  |
| Fbxl8         | 0 | 0        | 0 | 242  | 4.033333 | 5.21017  | 13.09579 | Stalled      | chr8:107786547-107793226  | 4.68    |
| Nadsyn1       | 0 | 0        | 0 | 291  | 4.85     | 3.49703  | 30.44721 | Stalled      | chr7:150981498-151010746  | 27.249  |
| Trim42        | 0 | 0        | 0 | 29   | 0.483333 | 0.057239 | 0        | Unclassified | chr9:97249980-97272377    | 20.398  |
| Spaca1        | 0 | 0        | 0 | 15   | 0.25     | 0.214999 | 1.960794 | Unclassified | chr4:34115288-34139042    | 21.755  |
| Fndc8         | 0 | 0        | 0 | 221  | 3.683333 | 0.117016 | 0.033514 | Unclassified | chr11:82703646-82714239   | 8.594   |
| Zfp184        | 0 | 0        | 0 | 42   | 0.7      | 2.3323   | 11.00347 | Stalled      | chr13:22034962-22052354   | 15.393  |
| BC030476      | 0 | 0        | 0 | 25   | 0.416667 | 0.113419 | 3.852253 | Unclassified | chr15:34381066-34403646   | 20.581  |
| UBqln2        | 0 | 0        | 0 | 221  | 3.683333 | 6.90605  | 10.00386 | Unclassified | chrX:149930774-149936101  | 3.328   |
| Cla5          | 0 | 0        | 0 | 24   | 0.4      | 0.029418 | 0.558038 | Unclassified | chr3:144733228-144764005  | 28.778  |
| Dpt           | 0 | 0        | 0 | 81   | 1.35     | 0.094007 | 0.258797 | Unclassified | chr1:166724862-166754397  | 27.536  |
| Pgam5         | 0 | 0        | 0 | 441  | 7.35     | 13.7924  | 7.723783 | Unclassified | chr5:110688153-110700918  | 10.766  |
| Leap2         | 0 | 0        | 0 | 73   | 1.216667 | 0.077362 | 40       | Unclassified | chr11:53235682-53238638   | 0.957   |
| Tspyl5        | 0 | 0        | 0 | 5    | 0.083333 | 0.201404 | 0.429387 | Unclassified | chr15:33613629-33619638   | 4.01    |
| 1700072E05Rik | 0 | 0        | 0 | 2    | 0.033333 | 0        | 0.679076 | Unclassified | chrX:83287537-83292652    | 3.116   |
| Ncoa6         | 0 | 0        | 0 | 255  | 4.25     | 4.75562  | 0        | Unclassified | chr2:155216400-155268519  | 50.12   |
| Vmn2r-ps14    | 0 | 0        | 0 | 25   | 0.416667 | 0.627729 | 9.092126 | Unclassified | chr4:145052112-145057864  | 3.753   |
| Tmem64        | 0 | 0        | 0 | 354  | 5.9      | 5.54328  | 28.51168 | Stalled      | chr4:15190966-15213900    | 20.935  |
| Cyp4a30b      | 0 | 0        | 0 | 6    | 0.1      | 0.058652 | 0.777382 | Unclassified | chr4:115123208-115143667  | 18.46   |
| Gm11435       | 0 | 0        | 0 | 71   | 1.183333 | 0.082025 | 1.379436 | Unclassified | chr11:83325237-83337677   | 10.441  |
| Hnf4g         | 0 | 0        | 0 | 52   | 0.866667 | 0.033727 | 0.75472  | Unclassified | chr3:3506029-3659800      | 151.772 |
| Krtap1-4      | 0 | 0        | 0 | 3    | 0.05     | 0        | 3        | Unclassified | chr11:99443862-99446991   | 1.13    |
| Vkorc1l1      | 0 | 0        | 0 | 345  | 5.75     | 3.68087  | 4.324095 | Unclassified | chr5:130415982-130458760  | 40.779  |
| Gpr21         | 0 | 0        | 0 | 17   | 0.283333 | 0        | 0.932908 | Unclassified | chr2:37370145-37374801    | 2.657   |
| Fgd4          | 0 | 0        | 0 | 62   | 1.033333 | 0.025511 | 1.405799 | Unclassified | chr16:16422070-16562289   | 138.22  |
| Cntlh         | 0 | 0        | 0 | 364  | 6.066667 | 2.26396  | 47.55718 | Stalled      | chr4:84528230-84777822    | 247.593 |
| Lamb2         | 0 | 0        | 0 | 75   | 1.25     | 0.772281 | 0.511167 | Unclassified | chr9:108380192-108392861  | 10.67   |
| Ptpr          | 0 | 0        | 0 | 156  | 2.6      | 0.691594 | 1.881168 | Unclassified | chr10:115453418-115711985 | 256.568 |
| Prkab2        | 0 | 0        | 0 | 186  | 3.1      | 1.63893  | 19.39984 | Stalled      | chr3:97460134-97476990    | 14.857  |
| Ptprm         | 0 | 0        | 0 | 554  | 9.233333 | 0.135805 | 3.902434 | Unclassified | chr17:67016188-67705799   | 687.612 |
| Ptprn         | 0 | 0        | 0 | 124  | 2.066667 | 0.123269 | 0.123268 | Unclassified | chr1:75243615-75262783    | 17.169  |
| Lama2         | 0 | 0        | 0 | 280  | 4.666667 | 0.03233  | 1.39079  | Unclassified | chr10:26701091-27338748   | 635.658 |
| Ptprg         | 0 | 0        | 0 | 494  | 8.233333 | 0.019524 | 0.582376 | Unclassified | chr14:12384066-13074553   | 688.488 |
| Lama4         | 0 | 0        | 0 | 95   | 1.583333 | 0.088264 | 1.212838 | Unclassified | chr10:38683646-38829937   | 144.292 |
| Ptprk         | 0 | 0        | 0 | 255  | 4.25     | 0.049796 | 0        | Unclassified | chr10:27792625-28317203   | 522.579 |
| Lamb1-1       | 0 | 0        | 0 | 103  | 1.716667 | 0.037647 | 0.387806 | Unclassified | chr12:31948158-32014504   | 64.347  |
| Bet1          | 0 | 0        | 0 | 117  | 1.95     | 11.0742  | 16.39977 | Stalled      | chr6:4026903-4038927      | 10.025  |
| Bex2          | 0 | 0        | 0 | 2    | 0.033333 | 3.48034  | 0        | Unclassified | chrX:132601104-132604649  | 1.546   |
| Tnfsf4        | 0 | 0        | 0 | 37   | 0.616667 | 0.573287 | 3.001576 | Unclassified | chr1:163323568-163348337  | 22.77   |
| Txk           | 0 | 0        | 0 | 116  | 1.933333 | 0.079627 | 2.459612 | Unclassified | chr5:73087216-73146012    | 56.797  |
| Twist1        | 0 | 0        | 0 | 8    | 0.133333 | 0.691924 | 0        | Unclassified | chr12:34640535-34644696   | 2.162   |
| Trim38        | 0 | 0        | 0 | 17   | 0.283333 | 0        | 0        | Unclassified | chr13:23872440-23883364   | 8.925   |
| Bdkrb1        | 0 | 0        | 0 | 10   | 0.166667 | 0.679823 | 0.869602 | Unclassified | chr12:106840300-106843638 | 1.339   |
| Bdkrb2        | 0 | 0        | 0 | 81   | 1.35     | 0.106803 | 1.157186 | Unclassified | chr12:106799381-106831281 | 29.901  |
| Bdnf          | 0 | 0        | 0 | 43   | 0.716667 | 0.099789 | 1.686299 | Unclassified | chr2:109512856-109567200  | 52.345  |
| Cmpk2         | 0 | 0        | 0 | 245  | 4.083333 | 6.03541  | 13.73055 | Unclassified | chr12:27152079-27164702   | 10.624  |
| Gm13276       | 0 | 0        | 0 | 0    | 0        | 0        | 0        | Unclassified | chr4:88428866-88432422    | 1.557   |
| Lrrc19        | 0 | 0        | 0 | 20   | 0.333333 | 0        | 0        | Unclassified | chr4:94303350-94318835    | 13.486  |
| Elf2          | 0 | 0        | 0 | 1520 | 25.33333 | 9.61943  | 0.219335 | Unclassified | chr3:51059586-51131909    | 70.324  |
| Zfp397        | 0 | 0        | 0 | 469  | 7.816667 | 3.16268  | 25.0562  | Unclassified | chr18:24111188-24123171   | 9.984   |
| Kctd5         | 0 | 0        | 0 | 792  | 13.2     | 10.8481  | 9.20648  | Unclassified | chr17:24184686-24212452   | 25.767  |
| Gm106         | 0 | 0        | 0 | 55   | 0.916667 | 0.074622 | 0.416698 | Unclassified | chr1:15843942-15884803    | 38.862  |
| 4930486G11Rik | 0 | 0        | 0 | 105  | 1.75     | 0.623626 | 9.014817 | Unclassified | chr9:81755350-81921098    | 163.749 |
| Taar7e        | 0 | 0        | 0 | 0    | 0        | 0        | 0        | Unclassified | chr10:23755419-23758496   | 1.078   |
| Fam13b        | 0 | 0        | 0 | 574  | 9.566667 | 3.10422  | 34.46193 | Unclassified | chr18:34602004-34668477   | 64.474  |
| D10Bwg1379e   | 0 | 0        | 0 | 162  | 2.7      | 0.417929 | 3.497164 | Unclassified | chr10:18307816-18465564   | 155.749 |
| Gm414         | 0 | 0        | 0 | 17   | 0.283333 | 0.035584 | 0.55675  | Unclassified | chr3:69809534-69832630    | 21.097  |
| Trim24        | 0 | 0        | 0 | 1365 | 22.75    | 8.27926  | 22.47275 | Unclassified | chr6:37818810-37916289    | 95.48   |
| Tiam1         | 0 | 0        | 0 | 447  | 7.45     | 0.728034 | 0.894787 | Unclassified | chr16:89787355-89976944   | 187.59  |
| Tie1          | 0 | 0        | 0 | 27   | 0.45     | 0.019824 | 0        | Unclassified | chr4:118143795-118164454  | 18.66   |
| Phlda1        | 0 | 0        | 0 | 245  | 4.083333 | 8.60711  | 6.246889 | Unclassified | chr10:110941341-110945705 | 2.365   |

|               |   |   |   |      |          |          |          |              |                           |         |
|---------------|---|---|---|------|----------|----------|----------|--------------|---------------------------|---------|
| Tdg           | 0 | 0 | 0 | 713  | 11.88333 | 5.68645  | 11.80419 | Unclassified | chr10:82090582-82113239   | 20.658  |
| I125          | 0 | 0 | 0 | 9    | 0.215    | 0.065058 | 0.584572 | Unclassified | chr14:55549607-55554671   | 3.065   |
| Otoa          | 0 | 0 | 0 | 133  | 2.216667 | 0.007025 | 6.320793 | Unclassified | chr7:128224951-128306603  | 79.653  |
| Ccdc83        | 0 | 0 | 0 | 26   | 0.433333 | 0.03316  | 1.697531 | Unclassified | chr7:97384270-97415942    | 29.673  |
| Gm14511       | 0 | 0 | 0 | 0    | 0        | 0        | 0        | Unclassified | chrX:8552837-8555685      | 0.849   |
| Semg1         | 0 | 0 | 0 | 0    | 0        | 0.04898  | 0        | Unclassified | chr2:164061664-164066077  | 2.414   |
| Olfr895       | 0 | 0 | 0 | 0    | 0        | 0.04043  | 0        | Unclassified | chr9:38074099-38077050    | 0.952   |
| Tmc2          | 0 | 0 | 0 | 80   | 1.333333 | 0.027896 | 0.473148 | Unclassified | chr2:130018929-130090181  | 69.253  |
| Tie6          | 0 | 0 | 0 | 58   | 0.966667 | 0.737738 | 7.029565 | Unclassified | chr10:81053649-81065645   | 9.997   |
| Olfr1083      | 0 | 0 | 0 | 0    | 0        | 0.016386 | 0        | Unclassified | chr2:86446783-86449726    | 0.944   |
| Abi3bp        | 0 | 0 | 0 | 166  | 2.766667 | 0.074705 | 0.561501 | Unclassified | chr16:56475958-56690241   | 212.284 |
| Olfr1040      | 0 | 0 | 0 | 0    | 0        | 0        | 0        | Unclassified | chr2:85985947-85988889    | 0.943   |
| Olfr924       | 0 | 0 | 0 | 0    | 0        | 0        | 0        | Unclassified | chr9:38653700-38656627    | 0.928   |
| Olfr776       | 0 | 0 | 0 | 2    | 0.033333 | 0        | 0        | Unclassified | chr10:128696018-128698957 | 0.94    |
| Olfr1173      | 0 | 0 | 0 | 0    | 0        | 0        | 0        | Unclassified | chr2:88114265-88117204    | 0.94    |
| Olfr1118      | 0 | 0 | 0 | 0    | 0        | 0.015514 | 0        | Unclassified | chr2:87146920-87149916    | 0.997   |
| Chrbn1        | 0 | 0 | 0 | 157  | 2.616667 | 3.30364  | 12.78981 | Stalled      | chr11:69597537-69611439   | 11.903  |
| Chrna7        | 0 | 0 | 0 | 75   | 1.25     | 0.036776 | 1.227572 | Unclassified | chr7:70243577-70359412    | 113.836 |
| Stk35         | 0 | 0 | 0 | 610  | 10.16667 | 4.92826  | 14.91471 | Unclassified | chr2:129624252-129658019  | 31.768  |
| Gstm5         | 0 | 0 | 0 | 13   | 0.216667 | 2.36237  | 13       | Unclassified | chr3:107696771-107701603  | 2.833   |
| Chrbn2        | 0 | 0 | 0 | 99   | 1.65     | 0.333308 | 1.070115 | Unclassified | chr3:89557369-89570554    | 11.186  |
| Dnajb7        | 0 | 0 | 0 | 19   | 0.316667 | 0        | 1.5754   | Unclassified | chr15:81237517-81240703   | 1.187   |
| Cend1         | 0 | 0 | 0 | 72   | 1.2      | 0.046408 | 9.008026 | Unclassified | chr7:148612349-148617319  | 2.971   |
| Pglyrp2       | 0 | 0 | 0 | 62   | 1.033333 | 3.76719  | 0        | Unclassified | chr17:32550044-32559920   | 7.877   |
| Rnf25         | 0 | 0 | 0 | 251  | 4.183333 | 9.98854  | 6.826278 | Unclassified | chr1:74640326-74649971    | 7.646   |
| Cntn1         | 0 | 0 | 0 | 184  | 3.066667 | 0.370747 | 1.846654 | Unclassified | chr15:91879595-92172398   | 290.804 |
| Tacc2         | 0 | 0 | 0 | 700  | 11.66667 | 1.70281  | 1.483124 | Unclassified | chr7:137718997-137908298  | 187.302 |
| Pkkaa1        | 0 | 0 | 0 | 421  | 7.016667 | 3.90922  | 12.23397 | Unclassified | chr15:5091860-5131899     | 38.04   |
| Zfp534        | 0 | 0 | 0 | 1    | 0.016667 | 0        | 0        | Unclassified | chr4:147047611-147078662  | 29.052  |
| Scrib         | 0 | 0 | 0 | 705  | 11.75    | 16.744   | 21.13901 | Unclassified | chr15:75877615-75902160   | 22.546  |
| Ifnk          | 0 | 0 | 0 | 24   | 0.4      | 0        | 1.260084 | Unclassified | chr4:35097303-35101268    | 1.966   |
| Tas2r134      | 0 | 0 | 0 | 0    | 0        | 0        | 0        | Unclassified | chr2:51481030-51483927    | 0.898   |
| Tas2r135      | 0 | 0 | 0 | 1    | 0.016667 | 0        | 0        | Unclassified | chr6:42353527-42356493    | 0.967   |
| Tas2r138      | 0 | 0 | 0 | 1    | 0.016667 | 0        | 0        | Unclassified | chr6:40562313-40565309    | 0.997   |
| Tas2r143      | 0 | 0 | 0 | 2    | 0.033333 | 0.072655 | 2        | Unclassified | chr6:42348236-42351118    | 0.883   |
| Tas2r144      | 0 | 0 | 0 | 1    | 0.016667 | 0        | 1        | Unclassified | chr6:42163326-42166286    | 0.961   |
| Magea3        | 0 | 0 | 0 | 0    | 0        | 0.004762 | 0        | Unclassified | chrX:151383005-151386112  | 1.108   |
| Magea2        | 0 | 0 | 0 | 0    | 0        | 0.006923 | 0        | Unclassified | chrX:151461743-151469835  | 6.093   |
| Smad9         | 0 | 0 | 0 | 65   | 1.083333 | 0.057301 | 1.256419 | Unclassified | chr3:54557503-54605179    | 45.677  |
| Moap1         | 0 | 0 | 0 | 394  | 6.566667 | 14.232   | 14.29442 | Unclassified | chr12:103978039-103983870 | 3.832   |
| Yipf3         | 0 | 0 | 0 | 519  | 8.65     | 22.3293  | 8.694458 | Unclassified | chr17:46383028-46389486   | 4.459   |
| Osbpl11       | 0 | 0 | 0 | 452  | 7.533333 | 6.19779  | 22.28102 | Unclassified | chr16:33183156-33243397   | 58.242  |
| Smad6         | 0 | 0 | 0 | 176  | 2.933333 | 0.435722 | 2.529825 | Unclassified | chr9:63800883-63871866    | 68.984  |
| Mnat1         | 0 | 0 | 0 | 658  | 10.96667 | 7.52948  | 16.2371  | Stalled      | chr12:74222703-74374975   | 150.273 |
| Mafk          | 0 | 0 | 0 | 783  | 13.05    | 12.5965  | 4.700037 | Unclassified | chr5:140265489-140278606  | 11.118  |
| Magea1        | 0 | 0 | 0 | 0    | 0        | 0.004145 | 0        | Unclassified | chrX:151523061-151526333  | 1.273   |
| Mag           | 0 | 0 | 0 | 52   | 0.866667 | 0.174264 | 1.551711 | Unclassified | chr7:31684201-31701851    | 15.651  |
| I830077J02Rik | 0 | 0 | 0 | 19   | 0.316667 | 0.108205 | 2.065574 | Unclassified | chr3:105728808-105737582  | 6.775   |
| Lrch3         | 0 | 0 | 0 | 1163 | 19.38333 | 4.57682  | 26.01178 | Unclassified | chr16:32912185-33016115   | 101.931 |
| Slain2        | 0 | 0 | 0 | 506  | 8.433333 | 6.75063  | 42.34031 | Stalled      | chr5:73303555-73370067    | 64.513  |
| Mtnr1b        | 0 | 0 | 0 | 14   | 0.233333 | 0        | 0.522513 | Unclassified | chr9:15667058-15681000    | 11.943  |
| Gpr146        | 0 | 0 | 0 | 946  | 15.76667 | 2.78596  | 1.866402 | Elongating   | chr5:139854620-139872368  | 15.749  |
| Armcx3        | 0 | 0 | 0 | 32   | 0.533333 | 2.91089  | 5.888982 | Unclassified | chrX:131289106-131295995  | 4.89    |
| Olfr853       | 0 | 0 | 0 | 0    | 0        | 0        | 0        | Unclassified | chr9:19341454-19344372    | 0.919   |
| Zfp40         | 0 | 0 | 0 | 91   | 1.516667 | 0.910831 | 20.45856 | Stalled      | chr17:23310835-23332195   | 19.361  |
| Slain1        | 0 | 0 | 0 | 344  | 5.733333 | 5.25204  | 26.61047 | Stalled      | chr14:104047459-104104016 | 54.558  |
| Sumf1         | 0 | 0 | 0 | 484  | 8.066667 | 6.07533  | 18.2462  | Stalled      | chr6:108057021-108137576  | 78.556  |
| Myot          | 0 | 0 | 0 | 8    | 0.133333 | 0.087107 | 0        | Unclassified | chr18:44491727-44515376   | 21.65   |
| Gstm4         | 0 | 0 | 0 | 194  | 3.233333 | 4.08576  | 42.24086 | Stalled      | chr3:107843327-107849774  | 4.448   |
| Rgs13         | 0 | 0 | 0 | 28   | 0.466667 | 0.068491 | 0.582734 | Unclassified | chr1:145985796-146026502  | 38.707  |
| 0610010012Rik | 0 | 0 | 0 | 167  | 2.783333 | 2.60635  | 9.501943 | Unclassified | chr18:36506277-36553024   | 44.748  |
| Rrh           | 0 | 0 | 0 | 197  | 3.283333 | 0.036776 | 2.4565   | Elongating   | chr3:129511492-129527423  | 13.932  |
| Rras          | 0 | 0 | 0 | 109  | 1.816667 | 9.5223   | 10.92165 | Stalled      | chr7:52271376-52277014    | 3.639   |
| Gng11         | 0 | 0 | 0 | 1    | 0.016667 | 0.214627 | 0        | Unclassified | chr6:3951986-3958445      | 4.46    |
| Defcr-rs1     | 0 | 0 | 0 | 0    | 0        | 0        | 0        | Unclassified | chr8:22465566-22468699    | 1.134   |
| BC051665      | 0 | 0 | 0 | 6    | 0.1      | 0.038133 | 0.40989  | Unclassified | chr13:60883253-60889725   | 4.473   |
| Hrh3          | 0 | 0 | 0 | 24   | 0.4      | 0.131747 | 3.192069 | Unclassified | chr2:179834177-179840927  | 4.751   |
| Mpi           | 0 | 0 | 0 | 236  | 3.933333 | 7.54164  | 3.166552 | Unclassified | chr9:57392074-57402559    | 8.486   |
| Cnr1          | 0 | 0 | 0 | 21   | 0.35     | 0.090489 | 1.183694 | Unclassified | chr4:34009606-34035806    | 24.201  |
| Vipr1         | 0 | 0 | 0 | 74   | 1.233333 | 0.776291 | 1.519119 | Unclassified | chr9:121549833-121582072  | 30.24   |
| Stx2          | 0 | 0 | 0 | 121  | 2.016667 | 1.19595  | 14.68905 | Stalled      | chr5:129490435-129516439  | 24.005  |
| Lpar1         | 0 | 0 | 0 | 98   | 1.633333 | 0.314705 | 2.230602 | Unclassified | chr4:58448123-58568363    | 118.241 |
| 2310007A19Rik | 0 | 0 | 0 | 19   | 0.316667 | 0.081633 | 0.336518 | Unclassified | chr3:94268906-94279513    | 8.608   |
| Vill          | 0 | 0 | 0 | 104  | 1.733333 | 1.91671  | 0.773384 | Unclassified | chr9:118959895-118980643  | 18.749  |
| Wdr69         | 0 | 0 | 0 | 34   | 0.566667 | 0.018973 | 0.60885  | Unclassified | chr1:83154336-83207145    | 50.81   |
| Tada1         | 0 | 0 | 0 | 397  | 6.616667 | 10.6851  | 9.429076 | Unclassified | chr1:168307297-168323749  | 14.453  |
| Olah          | 0 | 0 | 0 | 24   | 0.4      | 0        | 0        | Unclassified | chr2:3259259-3285841      | 24.583  |
| Mmp21         | 0 | 0 | 0 | 71   | 1.183333 | 0.075877 | 0.551889 | Unclassified | chr7:140865952-140873744  | 5.793   |
| Osbpl6        | 0 | 0 | 0 | 160  | 2.666667 | 0.089257 | 2.225352 | Unclassified | chr2:76242594-76438704    | 194.111 |
| Raet1e        | 0 | 0 | 0 | 3    | 0.05     | 0        | 0        | Unclassified | chr10:21891326-21903720   | 10.395  |
| Efcab6        | 0 | 0 | 0 | 223  | 3.716667 | 0.1419   | 0        | Unclassified | chr15:83697141-83897779   | 198.639 |
| Odf3          | 0 | 0 | 0 | 68   | 1.133333 | 0.027741 | 0.329007 | Unclassified | chr7:148031814-148036824  | 3.011   |
| Lnx2          | 0 | 0 | 0 | 784  | 13.06667 | 5.34562  | 13.35678 | Unclassified | chr5:147828230-147890148  | 59.919  |
| Gsta4         | 0 | 0 | 0 | 33   | 0.55     | 0.535128 | 7.589162 | Unclassified | chr9:78037772-78057156    | 17.385  |
| Clint1        | 0 | 0 | 0 | 752  | 12.53333 | 25.2936  | 8.708108 | Unclassified | chr11:45663465-45724127   | 58.663  |
| Arl4a         | 0 | 0 | 0 | 295  | 4.916667 | 4.35928  | 29.28284 | Stalled      | chr12:40759877-40765963   | 4.087   |

|               |   |   |   |      |          |          |          |              |                           |         |
|---------------|---|---|---|------|----------|----------|----------|--------------|---------------------------|---------|
| Grm1          | 0 | 0 | 0 | 247  | 4.116667 | 0.067021 | 0        | Unclassified | chr10:10408554-10804129   | 393.576 |
| Nr3c1         | 0 | 0 | 0 | 600  | 10       | 3.97066  | 1.154518 | Unclassified | chr18:39570198-39648899   | 76.702  |
| Pax9          | 0 | 0 | 0 | 14   | 0.233333 | 0.144395 | 0.548753 | Unclassified | chr12:57794625-57812217   | 15.593  |
| Grin2c        | 0 | 0 | 0 | 63   | 1.05     | 0.261825 | 3.025904 | Unclassified | chr11:115110482-115130557 | 18.076  |
| Grin2a        | 0 | 0 | 0 | 317  | 5.283333 | 0.024114 | 0.567797 | Unclassified | chr16:9577802-9994626     | 414.825 |
| Pbx2          | 0 | 0 | 0 | 183  | 3.05     | 13.5644  | 5.234763 | Unclassified | chr17:34727415-34734286   | 4.872   |
| Olf1349       | 0 | 0 | 0 | 4    | 0.066667 | 0.053737 | 0        | Unclassified | chr7:6467184-6470138      | 0.955   |
| Igbb1         | 0 | 0 | 0 | 194  | 3.233333 | 35.9508  | 9.842438 | Unclassified | chrX:97687629-97711464    | 21.836  |
| Kat2b         | 0 | 0 | 0 | 656  | 10.93333 | 1.43016  | 15.79912 | Unclassified | chr17:53704639-53812045   | 105.407 |
| Nat8l         | 0 | 0 | 0 | 43   | 0.716667 | 0.61436  | 1.065245 | Unclassified | chr5:34336632-34348565    | 9.934   |
| Gria4         | 0 | 0 | 0 | 120  | 2        | 0.025069 | 0        | Unclassified | chr9:4417892-4798234      | 378.343 |
| Zbtb25        | 0 | 0 | 0 | 881  | 14.68333 | 4.52675  | 13.17572 | Unclassified | chr12:77449930-77471986   | 20.057  |
| Rundc3a       | 0 | 0 | 0 | 83   | 1.383333 | 0.71308  | 0.821031 | Unclassified | chr11:102252748-102263867 | 9.12    |
| Kcnk15        | 0 | 0 | 0 | 16   | 0.266667 | 0.248378 | 4.074659 | Unclassified | chr2:163677485-163684610  | 5.126   |
| Olf205        | 0 | 0 | 0 | 0    | 0        | 0.040629 | 0        | Unclassified | chr16:59328415-59331333   | 0.919   |
| Olf1707       | 0 | 0 | 0 | 0    | 0        | 0.039545 | 0        | Unclassified | chr7:114034697-114037621  | 0.925   |
| Vat1l         | 0 | 0 | 0 | 133  | 2.216667 | 0.056104 | 0        | Unclassified | chr8:116727539-116897970  | 168.432 |
| Aldh16a1      | 0 | 0 | 0 | 616  | 10.26667 | 15.0117  | 34.07615 | Unclassified | chr7:52397209-52411908    | 12.7    |
| Adam26b       | 0 | 0 | 0 | 1    | 0.016667 | 0.014412 | 0        | Unclassified | chr8:44605217-44615491    | 8.275   |
| Zfp366        | 0 | 0 | 0 | 87   | 1.45     | 0.069705 | 0.843063 | Unclassified | chr13:99952777-100016987  | 62.211  |
| Gpr371l       | 0 | 0 | 0 | 13   | 0.216667 | 0.073951 | 0.738026 | Unclassified | chr1:137056826-137066258  | 7.433   |
| Acnat2        | 0 | 0 | 0 | 10   | 0.166667 | 0.034737 | 0        | Unclassified | chr4:49392716-49423023    | 28.308  |
| Ii17rd        | 0 | 0 | 0 | 80   | 1.333333 | 0.275929 | 3.920954 | Unclassified | chr14:27850186-27920472   | 68.287  |
| Cyp11b1       | 0 | 0 | 0 | 17   | 0.283333 | 0.066829 | 0.291211 | Unclassified | chr15:74665322-74674073   | 6.752   |
| Sgsh          | 0 | 0 | 0 | 204  | 3.4      | 2.36634  | 12.16831 | Unclassified | chr11:119204802-119218824 | 12.023  |
| Olf194        | 0 | 0 | 0 | 0    | 0        | 0.027826 | 0        | Unclassified | chr16:59118975-59121894   | 0.92    |
| 1700001J03Rik | 0 | 0 | 0 | 10   | 0.166667 | 0        | 0.63388  | Unclassified | chr5:146994025-146998880  | 2.856   |
| Id3           | 0 | 0 | 0 | 570  | 9.5      | 26.5793  | 1.93635  | Elongating   | chr4:135697736-135701307  | 1.572   |
| Parp4         | 0 | 0 | 0 | 507  | 8.45     | 2.93866  | 12.86863 | Unclassified | chr14:57192455-57278635   | 84.181  |
| 9030619P08Rik | 0 | 0 | 0 | 7    | 0.116667 | 0.02549  | 0.392097 | Unclassified | chr15:75258035-75264259   | 4.225   |
| Cplx1         | 0 | 0 | 0 | 52   | 0.866667 | 0.052622 | 1.636791 | Unclassified | chr5:108947572-108981046  | 31.475  |
| Wnt7a         | 0 | 0 | 0 | 67   | 1.116667 | 0.032283 | 1.744106 | Unclassified | chr6:91313976-91363363    | 47.388  |
| Apobec4       | 0 | 0 | 0 | 17   | 0.283333 | 0.040921 | 2.998749 | Unclassified | chr1:154595680-154604674  | 6.995   |
| Cicc1         | 0 | 0 | 0 | 389  | 6.483333 | 6.85945  | 25.44752 | Unclassified | chr3:108455164-108480929  | 23.766  |
| Epor          | 0 | 0 | 0 | 37   | 0.616667 | 0.812845 | 0.292922 | Unclassified | chr9:21763342-21770020    | 4.679   |
| Actn3         | 0 | 0 | 0 | 247  | 4.116667 | 0.117515 | 4.237095 | Unclassified | chr19:4861222-4879884     | 16.663  |
| Fbxo46        | 0 | 0 | 0 | 485  | 8.083333 | 5.58455  | 10.50758 | Unclassified | chr7:19703207-19723609    | 18.403  |
| Mil12         | 0 | 0 | 0 | 19   | 0.316667 | 0.059611 | 2.305582 | Unclassified | chr7:19423314-19444002    | 18.689  |
| Psg22         | 0 | 0 | 0 | 10   | 0.166667 | 0.017135 | 0.576211 | Unclassified | chr7:19301438-19312595    | 9.158   |
| Ddx25         | 0 | 0 | 0 | 84   | 1.4      | 1.3845   | 4.156583 | Unclassified | chr9:35349432-35368055    | 16.624  |
| Gpr50         | 0 | 0 | 0 | 5    | 0.083333 | 0.014233 | 0        | Unclassified | chrX:68914941-68921264    | 4.324   |
| Nmur1         | 0 | 0 | 0 | 4    | 0.066667 | 0.073657 | 3        | Unclassified | chr1:88282899-88286716    | 1.818   |
| Ing5          | 0 | 0 | 0 | 778  | 12.96667 | 4.13113  | 11.9771  | Unclassified | chr1:95698541-95718677    | 18.137  |
| Gpr27         | 0 | 0 | 0 | 3    | 0.05     | 0.393484 | 1        | Unclassified | chr6:99640672-99643812    | 1.141   |
| Gpr19         | 0 | 0 | 0 | 87   | 1.45     | 2.14247  | 1.619542 | Unclassified | chr6:134819110-134839877  | 18.768  |
| Gpr37         | 0 | 0 | 0 | 24   | 0.4      | 0.191834 | 0.518488 | Unclassified | chr6:25618522-25641980    | 21.459  |
| Tmed6         | 0 | 0 | 0 | 51   | 0.85     | 0.601444 | 1.049278 | Unclassified | chr8:109585383-109591544  | 4.162   |
| Pigyl         | 0 | 0 | 0 | 175  | 2.916667 | 29.0809  | 14.34664 | Unclassified | chr9:21959289-21962798    | 1.51    |
| Spesp1        | 0 | 0 | 0 | 13   | 0.216667 | 0.038283 | 1.7967   | Unclassified | chr9:62118535-62131986    | 11.452  |
| Lacln1        | 0 | 0 | 0 | 193  | 3.216667 | 2.7396   | 14.90739 | Stalled      | chr1:67047090-67087439    | 38.35   |
| Adat1         | 0 | 0 | 0 | 601  | 10.01667 | 2.37389  | 14.27155 | Unclassified | chr8:114490807-114518202  | 25.396  |
| Asb11         | 0 | 0 | 0 | 23   | 0.383333 | 0.020311 | 0.476203 | Unclassified | chrX:160874032-160897032  | 21.001  |
| Alkbh4        | 0 | 0 | 0 | 50   | 0.833333 | 5.37838  | 0.738059 | Unclassified | chr5:136612650-136617484  | 2.835   |
| Cotl1         | 0 | 0 | 0 | 1091 | 18.18333 | 168.915  | 10.17867 | Unclassified | chr8:122333113-122366479  | 31.367  |
| D5Wsu178e     | 0 | 0 | 0 | 614  | 10.23333 | 2.93412  | 32.53576 | Unclassified | chr5:30557157-30598976    | 39.82   |
| Ii1f9         | 0 | 0 | 0 | 8    | 0.133333 | 0.035928 | 0.549265 | Unclassified | chr2:24039995-24049087    | 7.093   |
| D6Wsu163e     | 0 | 0 | 0 | 611  | 10.18333 | 6.36187  | 23.37836 | Unclassified | chr6:126887983-126925722  | 35.74   |
| Eps813        | 0 | 0 | 0 | 29   | 0.483333 | 0        | 0.352067 | Unclassified | chr3:107678147-107695817  | 15.671  |
| Trp53i13      | 0 | 0 | 0 | 295  | 4.916667 | 4.69015  | 4.913854 | Unclassified | chr11:77321600-77328775   | 5.176   |
| Taok1         | 0 | 0 | 0 | 1160 | 19.33333 | 1.94884  | 44.7592  | Unclassified | chr11:77342663-77423317   | 78.655  |
| Fbn1          | 0 | 0 | 0 | 212  | 3.533333 | 0.059551 | 3.006208 | Unclassified | chr2:125126329-125334174  | 205.846 |
| Wap           | 0 | 0 | 0 | 12   | 0.2      | 0.068415 | 0.472949 | Unclassified | chr11:6535485-6540652     | 3.168   |
| Gm364         | 0 | 0 | 0 | 19   | 0.316667 | 0.023778 | 0        | Unclassified | chrX:54660330-54741944    | 79.615  |
| Vtn           | 0 | 0 | 0 | 21   | 0.35     | 0.02183  | 0.384785 | Unclassified | chr11:78310621-78315827   | 3.207   |
| Gpr101        | 0 | 0 | 0 | 6    | 0.1      | 0.021329 | 4.294682 | Unclassified | chrX:54749846-54758934    | 7.089   |
| Cct2          | 0 | 0 | 0 | 949  | 15.81667 | 106.67   | 6.457393 | Unclassified | chr10:116488053-116502870 | 12.818  |
| Ubt2          | 0 | 0 | 0 | 321  | 5.35     | 1.36321  | 32.42243 | Stalled      | chr11:32353371-32418709   | 63.339  |
| Olf1906       | 0 | 0 | 0 | 2    | 0.033333 | 0        | 1        | Unclassified | chr9:38293615-38296551    | 0.937   |
| Olf1220       | 0 | 0 | 0 | 0    | 0        | 0        | 0        | Unclassified | chr2:88937094-88940120    | 1.027   |
| Gstk1         | 0 | 0 | 0 | 27   | 0.45     | 2.12227  | 18.67613 | Stalled      | chr6:42193933-42200440    | 4.508   |
| Olf1812       | 0 | 0 | 0 | 1    | 0.016667 | 0.016562 | 1        | Unclassified | chr10:129279163-129282096 | 0.934   |
| Olf1263       | 0 | 0 | 0 | 2    | 0.033333 | 0        | 1        | Unclassified | chr2:89853088-89856009    | 0.922   |
| Olf1502       | 0 | 0 | 0 | 2    | 0.033333 | 0.009494 | 2        | Unclassified | chr19:13934284-13937235   | 0.952   |
| Olf1499       | 0 | 0 | 0 | 2    | 0.033333 | 0        | 1        | Unclassified | chr19:13889133-13892078   | 0.946   |
| Olf1878       | 0 | 0 | 0 | 0    | 0        | 0        | 0        | Unclassified | chr9:37724132-37727195    | 1.064   |
| Olf1904       | 0 | 0 | 0 | 0    | 0        | 0        | 0        | Unclassified | chr9:38269627-38272560    | 0.934   |
| Cpa1          | 0 | 0 | 0 | 6    | 0.1      | 0        | 0        | Unclassified | chr6:30587220-30595361    | 6.142   |
| Cml1          | 0 | 0 | 0 | 206  | 3.433333 | 2.64515  | 24.90213 | Stalled      | chr6:85860148-85867671    | 5.524   |
| Lrat          | 0 | 0 | 0 | 12   | 0.2      | 0.074277 | 0        | Unclassified | chr3:82696503-82709896    | 11.394  |
| Ndfip2        | 0 | 0 | 0 | 339  | 5.65     | 5.37642  | 38.57191 | Stalled      | chr14:105656020-105708490 | 50.471  |
| Ttc17         | 0 | 0 | 0 | 972  | 16.2     | 3.73449  | 38.23331 | Unclassified | chr2:94140922-94248846    | 105.925 |
| Ces8          | 0 | 0 | 0 | 26   | 0.433333 | 0.131747 | 0.858844 | Unclassified | chr8:107653699-107674008  | 18.31   |
| Mfn2          | 0 | 0 | 0 | 758  | 12.63333 | 10.3311  | 4.216196 | Unclassified | chr4:147247703-147280928  | 31.226  |
| Klra17        | 0 | 0 | 0 | 8    | 0.133333 | 0        | 0        | Unclassified | chr6:129781171-129828688  | 45.518  |
| Zscan5b       | 0 | 0 | 0 | 11   | 0.183333 | 0        | 0        | Unclassified | chr7:6171879-6191014      | 17.136  |
| Arr3          | 0 | 0 | 0 | 29   | 0.483333 | 0.019717 | 0        | Unclassified | chrX:97798894-97813832    | 12.939  |



|               |   |   |   |      |          |          |          |              |                           |         |
|---------------|---|---|---|------|----------|----------|----------|--------------|---------------------------|---------|
| Hectd1        | 0 | 0 | 0 | 1469 | 24.48333 | 13.6164  | 19.95137 | Unclassified | chr12:52844708-52932523   | 85.816  |
| Olf1217       | 0 | 0 | 0 | 0    | 0        | 0.030861 | 0        | Unclassified | chr2:88863243-88866158    | 0.916   |
| Unc84a        | 0 | 0 | 0 | 445  | 7.416667 | 5.07541  | 16.16926 | Unclassified | chr5:139674623-139725749  | 49.127  |
| Krt76         | 0 | 0 | 0 | 14   | 0.233333 | 0.049891 | 0        | Unclassified | chr15:101714781-101725351 | 8.571   |
| Tmco4         | 0 | 0 | 0 | 1954 | 32.56667 | 11.9391  | 26.78943 | Unclassified | chr4:138526819-138615086  | 86.268  |
| Ston1         | 0 | 0 | 0 | 31   | 0.516667 | 0.176035 | 0.822757 | Unclassified | chr17:89023894-89045064   | 19.171  |
| Mdk           | 0 | 0 | 0 | 96   | 1.6      | 1.24196  | 2.724816 | Unclassified | chr2:91769978-91774439    | 2.462   |
| Olf1361       | 0 | 0 | 0 | 2    | 0.033333 | 0.09404  | 1        | Unclassified | chr13:21750236-21753190   | 0.955   |
| Olf777        | 0 | 0 | 0 | 1    | 0.016667 | 0        | 1        | Unclassified | chr10:128705441-128708377 | 0.937   |
| Olf1360       | 0 | 0 | 0 | 0    | 0        | 0.01957  | 0        | Unclassified | chr13:21765869-21768849   | 0.981   |
| Olf315        | 0 | 0 | 0 | 3    | 0.05     | 0.082686 | 3        | Unclassified | chr11:58589630-58592560   | 0.931   |
| Olf311        | 0 | 0 | 0 | 2    | 0.033333 | 0.049975 | 0        | Unclassified | chr11:58652617-58655544   | 0.928   |
| Exoc2         | 0 | 0 | 0 | 1123 | 18.71667 | 4.94166  | 17.29488 | Unclassified | chr13:30905786-31067916   | 160.131 |
| Olf576        | 0 | 0 | 0 | 2    | 0.033333 | 0        | 1        | Unclassified | chr7:110111615-110114554  | 0.94    |
| Olf1518       | 0 | 0 | 0 | 0    | 0        | 0        | 0        | Unclassified | chr10:128685591-128688530 | 0.94    |
| Eif4ebp1      | 0 | 0 | 0 | 503  | 8.383333 | 35.798   | 4.703042 | Unclassified | chr8:28368798-28386128    | 15.331  |
| Ppt1          | 0 | 0 | 0 | 548  | 9.133333 | 9.11688  | 4.800464 | Unclassified | chr4:122511484-122536418  | 22.935  |
| Ppyr1         | 0 | 0 | 0 | 7    | 0.116667 | 0.01347  | 0.590793 | Unclassified | chr14:34958831-34967605   | 6.775   |
| Ppy           | 0 | 0 | 0 | 4    | 0.066667 | 0.053401 | 1        | Unclassified | chr11:101961244-101964614 | 1.371   |
| Eps15         | 0 | 0 | 0 | 684  | 11.4     | 7.69244  | 21.42332 | Unclassified | chr4:108950879-109060415  | 107.537 |
| Gm438         | 0 | 0 | 0 | 13   | 0.216667 | 0.06265  | 0.964386 | Unclassified | chr4:144367106-144378486  | 9.381   |
| Cbr4          | 0 | 0 | 0 | 161  | 2.683333 | 8.35296  | 21.8972  | Stalled      | chr8:63964530-63982297    | 15.768  |
| BC027072      | 0 | 0 | 0 | 18   | 0.3      | 0.015361 | 2.048987 | Unclassified | chr17:72092894-72104225   | 9.332   |
| Otud7a        | 0 | 0 | 0 | 258  | 4.3      | 0.114795 | 2.21674  | Unclassified | chr7:70587657-70903913    | 314.257 |
| Podn1         | 0 | 0 | 0 | 104  | 1.733333 | 0.104749 | 0.33675  | Unclassified | chr8:86647887-86656416    | 6.53    |
| V1rg4         | 0 | 0 | 0 | 1    | 0.016667 | 0.02629  | 1        | Unclassified | chr7:12515659-12518634    | 0.976   |
| Mdh1b         | 0 | 0 | 0 | 85   | 1.416667 | 0.067454 | 31.92163 | Stalled      | chr1:63745401-63778892    | 31.492  |
| Apoa5         | 0 | 0 | 0 | 15   | 0.25     | 0.121469 | 0.302096 | Unclassified | chr9:46074690-46080002    | 3.313   |
| Clage5        | 0 | 0 | 0 | 1211 | 20.18333 | 11.8765  | 0.048732 | Unclassified | chr12:60228732-60291207   | 60.476  |
| Mre11a        | 0 | 0 | 0 | 1056 | 17.6     | 7.46955  | 31.41442 | Unclassified | chr9:14587150-14638861    | 49.712  |
| 38966         | 0 | 0 | 0 | 955  | 15.91667 | 23.2658  | 41.0987  | Unclassified | chr9:25058168-25116150    | 55.983  |
| Hmgcs2        | 0 | 0 | 0 | 54   | 0.9      | 0.054504 | 0.758198 | Unclassified | chr3:98082353-98114659    | 30.307  |
| Lin37         | 0 | 0 | 0 | 204  | 3.4      | 18.5369  | 3.931328 | Unclassified | chr7:31340459-31346665    | 4.207   |
| Trpa1         | 0 | 0 | 0 | 32   | 0.533333 | 0.081173 | 0.601149 | Unclassified | chr1:14862728-14910943    | 46.216  |
| C8a           | 0 | 0 | 0 | 54   | 0.9      | 0.037037 | 1.078741 | Unclassified | chr4:104488286-104551003  | 60.718  |
| Mertk         | 0 | 0 | 0 | 131  | 2.183333 | 0.104549 | 0        | Unclassified | chr2:128522732-128627924  | 103.193 |
| Lrg1          | 0 | 0 | 0 | 10   | 0.166667 | 0.094725 | 0.405104 | Unclassified | chr17:56259100-56263369   | 2.27    |
| Olf1247       | 0 | 0 | 0 | 1    | 0.016667 | 0        | 1        | Unclassified | chr2:89449312-89452257    | 0.946   |
| Meis2         | 0 | 0 | 0 | 135  | 2.25     | 0.251468 | 0        | Unclassified | chr2:115686999-115892794  | 203.796 |
| Phf16         | 0 | 0 | 0 | 87   | 1.45     | 2.0737   | 0.398745 | Unclassified | chrX:20035652-20095022    | 57.371  |
| Rbm3          | 0 | 0 | 0 | 1367 | 22.78333 | 36.9103  | 3.304065 | Unclassified | chrX:7716100-7724928      | 6.829   |
| Ctr9          | 0 | 0 | 0 | 367  | 6.116667 | 7.52827  | 27.77052 | Unclassified | chr7:118170464-118199891  | 27.428  |
| Klra7         | 0 | 0 | 0 | 7    | 0.116667 | 0        | 0        | Unclassified | chr6:130168622-130185340  | 14.719  |
| Tsg101        | 0 | 0 | 0 | 664  | 11.06667 | 5.89197  | 43.84692 | Unclassified | chr7:54144396-54177300    | 30.905  |
| Plek2         | 0 | 0 | 0 | 140  | 2.333333 | 0.206582 | 0.930526 | Unclassified | chr12:79989683-80009925   | 18.243  |
| Syce1         | 0 | 0 | 0 | 14   | 0.233333 | 0.113796 | 2.1845   | Unclassified | chr7:147963128-147975753  | 10.626  |
| Gzme          | 0 | 0 | 0 | 2    | 0.033333 | 0.086497 | 0.667553 | Unclassified | chr14:56736455-56741462   | 3.008   |
| Cst9          | 0 | 0 | 0 | 3    | 0.05     | 0.074731 | 1.443207 | Unclassified | chr2:148658882-148664473  | 3.592   |
| Olf1226       | 0 | 0 | 0 | 0    | 0        | 0        | 0        | Unclassified | chr2:89033256-89036189    | 0.934   |
| 1810011O10Rik | 0 | 0 | 0 | 1    | 0.016667 | 0.125178 | 1        | Unclassified | chr8:25548087-25551418    | 1.332   |
| Pnlp          | 0 | 0 | 0 | 7    | 0.116667 | 0.068951 | 0        | Unclassified | chr19:58742854-58756278   | 11.425  |
| 4931432M23Rik | 0 | 0 | 0 | 16   | 0.266667 | 0.044501 | 1.662058 | Unclassified | chr8:98083191-98101097    | 15.907  |
| 1810014F10Rik | 0 | 0 | 0 | 41   | 0.683333 | 1.86218  | 6.504811 | Unclassified | chr7:147285368-147290305  | 2.938   |
| Rdx           | 0 | 0 | 0 | 626  | 10.43333 | 20.6933  | 17.0128  | Unclassified | chr9:51854045-51896843    | 40.799  |
| Rfc1          | 0 | 0 | 0 | 906  | 15.1     | 8.91622  | 16.86575 | Unclassified | chr5:65653090-65728878    | 73.789  |
| Gm7609        | 0 | 0 | 0 | 24   | 0.4      | 1.68978  | 5.229197 | Unclassified | chr1:85194185-85210337    | 14.153  |
| Rdh16         | 0 | 0 | 0 | 10   | 0.166667 | 0.04592  | 0.603315 | Unclassified | chr10:127236208-127252895 | 14.688  |
| Rdh5          | 0 | 0 | 0 | 57   | 0.95     | 0.325494 | 1.282554 | Unclassified | chr10:128350646-128358353 | 5.708   |
| Dgat2l6       | 0 | 0 | 0 | 9    | 0.15     | 0        | 2.406458 | Unclassified | chrX:97718176-97741447    | 21.272  |
| Olf980        | 0 | 0 | 0 | 1    | 0.016667 | 0.013704 | 0        | Unclassified | chr9:39813599-39816532    | 0.934   |
| Olf974        | 0 | 0 | 0 | 2    | 0.033333 | 0        | 2        | Unclassified | chr9:39747846-39750779    | 0.934   |
| Olf979        | 0 | 0 | 0 | 0    | 0        | 0.020523 | 0        | Unclassified | chr9:39807874-39810810    | 0.937   |
| Olf577        | 0 | 0 | 0 | 2    | 0.033333 | 0.027298 | 1        | Unclassified | chr7:110121565-110124504  | 0.94    |
| Olf570        | 0 | 0 | 0 | 2    | 0.033333 | 0        | 2        | Unclassified | chr7:110046882-110049821  | 0.94    |
| Olf586        | 0 | 0 | 0 | 0    | 0        | 0        | 0        | Unclassified | chr7:110270342-110273296  | 0.955   |
| Olf559        | 0 | 0 | 0 | 1    | 0.016667 | 0.033433 | 1        | Unclassified | chr7:109872045-109875002  | 0.958   |
| Olf575        | 0 | 0 | 0 | 0    | 0        | 0        | 0        | Unclassified | chr7:110103177-110106134  | 0.958   |
| Olf578        | 0 | 0 | 0 | 1    | 0.016667 | 0.027211 | 1        | Unclassified | chr7:110132734-110135676  | 0.943   |
| Foxc1         | 0 | 0 | 0 | 43   | 0.716667 | 1.54615  | 0.453305 | Unclassified | chr13:31896514-31902504   | 3.991   |
| Foxd2         | 0 | 0 | 0 | 139  | 2.316667 | 1.26237  | 26.67372 | Stalled      | chr4:114578884-114583503  | 2.62    |
| Rps6ka4       | 0 | 0 | 0 | 244  | 4.066667 | 10.1169  | 9.156353 | Unclassified | chr19:6903573-6917091     | 11.519  |
| Mfge8         | 0 | 0 | 0 | 79   | 1.316667 | 6.58532  | 10.58939 | Stalled      | chr7:86278653-86295946    | 15.294  |
| Net1          | 0 | 0 | 0 | 519  | 8.65     | 18.081   | 8.523029 | Unclassified | chr13:3881808-3894824     | 11.017  |
| Hsd17b12      | 0 | 0 | 0 | 1273 | 21.21667 | 23.2449  | 23.17799 | Unclassified | chr2:93872853-94000066    | 125.214 |
| Mgat3         | 0 | 0 | 0 | 63   | 1.05     | 0.068683 | 0.404762 | Unclassified | chr15:80002150-80045949   | 41.8    |
| Olf1250       | 0 | 0 | 0 | 1    | 0.016667 | 0.032703 | 1        | Unclassified | chr2:89496651-89499596    | 0.946   |
| Clec4e        | 0 | 0 | 0 | 13   | 0.216667 | 0.442644 | 3.248548 | Unclassified | chr6:123231806-123241889  | 8.084   |
| Rims2         | 0 | 0 | 0 | 232  | 3.866667 | 0.125493 | 4.103768 | Unclassified | chr15:39027877-39513486   | 483.61  |
| Olf1138       | 0 | 0 | 0 | 3    | 0.05     | 0        | 2        | Unclassified | chr2:87577543-87580479    | 0.937   |
| Meaf6         | 0 | 0 | 0 | 589  | 9.816667 | 11.1741  | 27.40265 | Unclassified | chr4:124760390-124787133  | 24.744  |
| Lysmd2        | 0 | 0 | 0 | 71   | 1.183333 | 1.4632   | 12.60509 | Stalled      | chr9:75471538-75485580    | 12.043  |
| 2210010C17Rik | 0 | 0 | 0 | 30   | 0.5      | 0        | 0        | Unclassified | chr7:20522653-20538092    | 13.44   |
| Cysltr2       | 0 | 0 | 0 | 48   | 0.8      | 0.301301 | 3.452998 | Unclassified | chr14:73428935-73450921   | 19.987  |
| Cuzd1         | 0 | 0 | 0 | 19   | 0.316667 | 0.051129 | 1.377794 | Unclassified | chr7:138452067-138467806  | 13.74   |
| Itm2b         | 0 | 0 | 0 | 619  | 10.31667 | 87.3562  | 12.38317 | Unclassified | chr14:73762038-73787078   | 23.041  |
| Itm2a         | 0 | 0 | 0 | 13   | 0.216667 | 3.12533  | 6.326681 | Unclassified | chrX:104592533-104600699  | 6.167   |

|                      |   |          |   |      |           |          |          |              |                           |         |
|----------------------|---|----------|---|------|-----------|----------|----------|--------------|---------------------------|---------|
| <b>Olf1151</b>       | 0 | 0        | 0 | 0    | 0         | 0        | 0        | Unclassified | chr2:87695333-87698260    | 0.928   |
| <b>Olf1155</b>       | 0 | 0        | 0 | 1    | 0.016667  | 0.040687 | 0        | Unclassified | chr2:87782838-87785783    | 0.946   |
| <b>Snapc4</b>        | 0 | 0        | 0 | 486  | 8.1       | 8.21182  | 5.907393 | Unclassified | chr2:26218295-26238139    | 17.845  |
| <b>Cpeb2</b>         | 0 | 0        | 0 | 575  | 9.583333  | 1.96791  | 37.60954 | Stalled      | chr5:43623197-43677429    | 52.233  |
| <b>AF366264</b>      | 0 | 0        | 0 | 4    | 0.066667  | 0.045326 | 4        | Unclassified | chr8:13835230-13840089    | 2.86    |
| <b>Ssr4</b>          | 0 | 0        | 0 | 573  | 9.55      | 127.68   | 7.79442  | Unclassified | chrX:71030481-71036166    | 3.686   |
| <b>Mfap1b</b>        | 0 | 0        | 0 | 187  | 3.116667  | 15.2363  | 64.61232 | Stalled      | chr2:121287401-121301759  | 12.359  |
| <b>Znrf4</b>         | 0 | 0        | 0 | 11   | 0.183333  | 0.186646 | 0.529727 | Unclassified | chr17:56650670-56653906   | 1.237   |
| <b>Arhgap15</b>      | 0 | 159.6624 | 0 | 3170 | 52.833333 | 6.79453  | 3.545401 | Unclassified | chr2:43602343-44243143    | 638.801 |
| <b>Atp2c2</b>        | 0 | 0        | 0 | 134  | 2.233333  | 0.286309 | 1.577839 | Unclassified | chr8:122221908-122281618  | 57.711  |
| <b>Dctn3</b>         | 0 | 0        | 0 | 244  | 4.066667  | 29.6623  | 11.69644 | Unclassified | chr4:41661829-41672195    | 8.367   |
| <b>Slc38a7</b>       | 0 | 0        | 0 | 136  | 2.266667  | 2.06945  | 4.087182 | Unclassified | chr8:98359822-98379391    | 17.57   |
| <b>Daam2</b>         | 0 | 0        | 0 | 173  | 2.883333  | 0.097527 | 0.388384 | Unclassified | chr17:49595346-49705662   | 108.317 |
| <b>Ldoc1l</b>        | 0 | 0        | 0 | 132  | 2.2       | 6.37221  | 5.274865 | Unclassified | chr15:84383827-84390253   | 4.427   |
| <b>Olf153</b>        | 0 | 0        | 0 | 1    | 0.016667  | 0.084701 | 0        | Unclassified | chr7:147835879-147838818  | 0.94    |
| <b>Fibin</b>         | 0 | 0        | 0 | 2    | 0.033333  | 0.05575  | 1        | Unclassified | chr2:110201081-110205150  | 2.07    |
| <b>5031439G07Rik</b> | 0 | 0        | 0 | 584  | 9.733333  | 7.63481  | 16.87502 | Unclassified | chr15:84776149-84820401   | 42.253  |
| <b>Rbm6</b>          | 0 | 0        | 0 | 1190 | 19.833333 | 7.84085  | 56.50007 | Unclassified | chr9:107675890-107777150  | 99.261  |
| <b>Mmd2</b>          | 0 | 0        | 0 | 61   | 1.016667  | 0.077473 | 0.865781 | Unclassified | chr5:143039434-143086706  | 45.273  |
| <b>Klra5</b>         | 0 | 0        | 0 | 4    | 0.066667  | 0        | 0        | Unclassified | chr6:129849008-129865242  | 14.235  |
| <b>9930032O22Rik</b> | 0 | 0        | 0 | 25   | 0.416667  | 0.026775 | 0        | Unclassified | chr5:86914901-86949625    | 32.725  |
| <b>P4ha3</b>         | 0 | 0        | 0 | 60   | 1         | 0.105891 | 1.505103 | Unclassified | chr7:107432029-107468208  | 34.18   |
| <b>Tmtc4</b>         | 0 | 0        | 0 | 397  | 6.616667  | 0.78259  | 42.64022 | Stalled      | chr14:123318196-123384483 | 64.288  |
| <b>Mmsp</b>          | 0 | 0        | 0 | 68   | 1.133333  | 0        | 0.395577 | Unclassified | chr4:43596087-43599366    | 1.28    |
| <b>Wdr46</b>         | 0 | 0        | 0 | 482  | 8.033333  | 24.405   | 3.895225 | Unclassified | chr17:34075667-34086640   | 8.974   |
| <b>Galnt14</b>       | 0 | 0        | 0 | 274  | 4.566667  | 0.275341 | 4.098184 | Unclassified | chr17:73843090-74061791   | 216.702 |
| <b>Ephx3</b>         | 0 | 0        | 0 | 42   | 0.7       | 0.219979 | 4.052551 | Unclassified | chr17:32320714-32328408   | 5.695   |
| <b>Gypc</b>          | 0 | 0        | 0 | 1636 | 27.26667  | 18.1056  | 4.33648  | Unclassified | chr18:32687973-32721688   | 31.716  |
| <b>Wdr27</b>         | 0 | 0        | 0 | 409  | 6.816667  | 0.097551 | 125.3123 | Stalled      | chr17:14955678-15082129   | 124.452 |
| <b>Bai3</b>          | 0 | 0        | 0 | 355  | 5.916667  | 0.041777 | 0.683804 | Unclassified | chr1:25124320-25888552    | 762.233 |
| <b>Niacr1</b>        | 0 | 0        | 0 | 7    | 0.116667  | 0.191782 | 0.715156 | Unclassified | chr5:124313580-124317518  | 1.939   |
| <b>Maged2</b>        | 0 | 0        | 0 | 13   | 0.216667  | 0.978724 | 0        | Unclassified | chrX:147240963-147250825  | 7.863   |
| <b>Senp3</b>         | 0 | 0        | 0 | 496  | 8.266667  | 28.9134  | 12.88816 | Unclassified | chr11:69486613-69497472   | 8.86    |
| <b>Ntnng1</b>        | 0 | 0        | 0 | 208  | 3.466667  | 0.553181 | 1.919537 | Unclassified | chr3:109582967-109948390  | 363.424 |
| <b>Olf1193</b>       | 0 | 0        | 0 | 0    | 0         | 0        | 0        | Unclassified | chr2:88516013-88518970    | 0.958   |
| <b>Olf1036</b>       | 0 | 0        | 0 | 0    | 0         | 0.020589 | 0        | Unclassified | chr2:85912898-85915831    | 0.934   |
| <b>Zfp281</b>        | 0 | 0        | 0 | 225  | 3.75      | 5.48544  | 7.311924 | Unclassified | chr1:138519477-138526968  | 5.492   |
| <b>Fert2</b>         | 0 | 0        | 0 | 179  | 2.983333  | 0.293992 | 0.578047 | Unclassified | chr17:64243366-64488843   | 243.478 |
| <b>Cntnap5a</b>      | 0 | 0        | 0 | 368  | 6.133333  | 0.045831 | 0        | Unclassified | chr1:117579713-118477251  | 895.539 |
| <b>Ttc5</b>          | 0 | 0        | 0 | 199  | 3.316667  | 11.0825  | 8.091857 | Unclassified | chr14:51385089-51407193   | 20.105  |
| <b>Fech</b>          | 0 | 0        | 0 | 341  | 5.683333  | 2.76756  | 32.84642 | Stalled      | chr18:64616203-64650720   | 32.518  |
| <b>Atp5g3</b>        | 0 | 0        | 0 | 447  | 7.45      | 279.198  | 9.558837 | Unclassified | chr2:73746506-73751351    | 2.846   |
| <b>Krt35</b>         | 0 | 0        | 0 | 7    | 0.116667  | 0        | 0.335842 | Unclassified | chr11:99953505-99959538   | 4.034   |
| <b>Nid2</b>          | 0 | 0        | 0 | 211  | 3.516667  | 1.40812  | 4.514824 | Unclassified | chr14:20568478-20631009   | 60.532  |
| <b>Olf1631</b>       | 0 | 0        | 0 | 8    | 0.133333  | 0.077466 | 1.395496 | Unclassified | chr7:111061575-111078425  | 14.851  |
| <b>D230037D09Rik</b> | 0 | 0        | 0 | 369  | 6.15      | 13.7934  | 7.097688 | Unclassified | chr12:103979969-103983607 | 1.639   |
| <b>Nt5c1b</b>        | 0 | 0        | 0 | 14   | 0.233333  | 0.013818 | 0.596336 | Unclassified | chr12:10374776-10396980   | 20.205  |
| <b>Cyp2g1</b>        | 0 | 0        | 0 | 12   | 0.2       | 0.02075  | 1.059797 | Unclassified | chr7:27591945-27606216    | 12.272  |
| <b>Dmrtc1a</b>       | 0 | 0        | 0 | 0    | 0         | 0        | 0        | Unclassified | chrX:100098559-100106026  | 5.468   |
| <b>Iyd</b>           | 0 | 0        | 0 | 18   | 0.3       | 0.066578 | 0.492754 | Unclassified | chr10:6791663-6808262     | 14.6    |
| <b>Cyp2d9</b>        | 0 | 0        | 0 | 4    | 0.066667  | 0.024759 | 0        | Unclassified | chr15:82280806-82287257   | 4.452   |
| <b>Cyp2e1</b>        | 0 | 0        | 0 | 8    | 0.133333  | 0.014765 | 1.339803 | Unclassified | chr7:147947730-147960876  | 11.147  |
| <b>Cyp2f2</b>        | 0 | 0        | 0 | 18   | 0.3       | 0        | 0.427744 | Unclassified | chr7:27902973-27918679    | 13.707  |
| <b>Cyp2d10</b>       | 0 | 0        | 0 | 7    | 0.116667  | 0.030992 | 0        | Unclassified | chr15:82233275-82239624   | 4.35    |
| <b>Zfp597</b>        | 0 | 0        | 0 | 181  | 3.016667  | 2.45937  | 18.48352 | Stalled      | chr16:3861543-3874374     | 10.832  |
| <b>Oit1</b>          | 0 | 0        | 0 | 41   | 0.683333  | 0.02049  | 1.751341 | Unclassified | chr14:9181461-9213277     | 29.817  |
| <b>Mtpn</b>          | 0 | 0        | 0 | 537  | 8.95      | 29.9918  | 16.48745 | Unclassified | chr6:35458823-35491888    | 31.066  |
| <b>E130201H02Rik</b> | 0 | 0        | 0 | 1    | 0.016667  | 35.859   | 1        | Unclassified | chr7:127739138-127741988  | 0.851   |
| <b>Ppp1r12a</b>      | 0 | 0        | 0 | 1450 | 24.16667  | 12.8642  | 51.75249 | Unclassified | chr10:107597455-107714631 | 115.177 |
| <b>Sbpl</b>          | 0 | 0        | 0 | 4    | 0.066667  | 0.094873 | 2        | Unclassified | chr17:24090051-24094240   | 2.19    |
| <b>Myt1l</b>         | 0 | 0        | 0 | 318  | 5.3       | 0.042778 | 0.554821 | Unclassified | chr12:30211248-30608074   | 394.827 |
| <b>Myt1</b>          | 0 | 0        | 0 | 67   | 1.116667  | 0.026064 | 0        | Unclassified | chr2:181499746-181562473  | 60.728  |
| <b>Cetn4</b>         | 0 | 0        | 0 | 80   | 1.333333  | 0.894477 | 54.63334 | Stalled      | chr3:37207548-37213368    | 3.821   |
| <b>Fam20a</b>        | 0 | 0        | 0 | 121  | 2.016667  | 0.116008 | 1.808697 | Unclassified | chr11:109534239-109585570 | 49.332  |
| <b>Fzd8</b>          | 0 | 0        | 0 | 13   | 0.216667  | 0.21846  | 1.254682 | Unclassified | chr18:9210853-9216197     | 3.345   |
| <b>Fzd9</b>          | 0 | 0        | 0 | 86   | 1.433333  | 1.09334  | 1.626141 | Elongating   | chr5:135724807-135728917  | 2.111   |
| <b>Ganab</b>         | 0 | 0        | 0 | 770  | 12.833333 | 36.6055  | 13.19205 | Unclassified | chr19:8970600-8991155     | 18.556  |
| <b>G6pc</b>          | 0 | 0        | 0 | 7    | 0.116667  | 0.034253 | 0        | Unclassified | chr11:101227043-101239217 | 10.175  |
| <b>Chodl</b>         | 0 | 0        | 0 | 16   | 0.266667  | 0.03546  | 1.810323 | Unclassified | chr16:78929192-78951973   | 20.782  |
| <b>Slc36a2</b>       | 0 | 0        | 0 | 48   | 0.8       | 0.144837 | 1.119835 | Unclassified | chr11:54971969-55000579   | 26.611  |
| <b>Ccl9</b>          | 0 | 0        | 0 | 10   | 0.166667  | 0.262021 | 0        | Unclassified | chr11:83386418-83394138   | 5.721   |
| <b>Saa3</b>          | 0 | 0        | 0 | 30   | 0.5       | 49.0636  | 0.417445 | Unclassified | chr7:53967367-53973046    | 3.68    |
| <b>Mtap4</b>         | 0 | 0        | 0 | 1134 | 18.9      | 15.5515  | 33.78458 | Unclassified | chr9:109832277-109986451  | 152.175 |
| <b>Ccl5</b>          | 0 | 0        | 0 | 99   | 1.65      | 14.5018  | 3.191919 | Unclassified | chr11:83339280-83346020   | 4.741   |
| <b>Ccl6</b>          | 0 | 0        | 0 | 4    | 0.066667  | 0.080325 | 0.583507 | Unclassified | chr11:83401387-83408589   | 5.203   |
| <b>Ccl7</b>          | 0 | 0        | 0 | 2    | 0.033333  | 0.144726 | 0.447819 | Unclassified | chr11:81857213-81861023   | 1.811   |
| <b>Kndc1</b>         | 0 | 0        | 0 | 85   | 1.416667  | 0.038609 | 1.084291 | Unclassified | chr7:147078594-147127439  | 46.846  |
| <b>Ccl3</b>          | 0 | 0        | 0 | 18   | 0.3       | 1.46009  | 1.270004 | Unclassified | chr11:83461344-83464880   | 1.537   |
| <b>Ppp1r3g</b>       | 0 | 0        | 0 | 11   | 0.183333  | 0.979566 | 4.175141 | Unclassified | chr13:36057774-36062251   | 2.478   |
| <b>D930020B18Rik</b> | 0 | 0        | 0 | 68   | 1.133333  | 0.695501 | 3.894122 | Unclassified | chr10:121076756-121130970 | 52.215  |
| <b>Stap2</b>         | 0 | 0        | 0 | 35   | 0.583333  | 0.16332  | 6.328265 | Unclassified | chr17:56136501-56146991   | 8.491   |
| <b>Rbp1</b>          | 0 | 0        | 0 | 52   | 0.866667  | 1.02439  | 0.649251 | Unclassified | chr9:98321379-98346969    | 23.591  |
| <b>Ola1</b>          | 0 | 0        | 0 | 1026 | 17.1      | 15.4091  | 37.40923 | Unclassified | chr2:72930857-73054504    | 121.648 |
| <b>Dgkk</b>          | 0 | 0        | 0 | 33   | 0.55      | 0.023283 | 1.69706  | Unclassified | chrX:6354431-6525489      | 169.059 |
| <b>Tmem5</b>         | 0 | 0        | 0 | 193  | 3.216667  | 6.39835  | 37.60355 | Stalled      | chr10:121518315-121536158 | 15.844  |
| <b>Adcy1</b>         | 0 | 0        | 0 | 120  | 2         | 0.026139 | 0        | Unclassified | chr11:6961491-7078508     | 115.018 |

|               |   |   |   |      |          |          |          |              |                           |         |
|---------------|---|---|---|------|----------|----------|----------|--------------|---------------------------|---------|
| 1700019N19Rik | 0 | 0 | 0 | 11   | 0.183333 | 0        | 0        | Unclassified | chr19:58860292-58870904   | 8.613   |
| Pri7c1        | 0 | 0 | 0 | 2    | 0.033333 | 0        | 0.86322  | Unclassified | chr13:27865363-27874673   | 7.311   |
| Rnf151        | 0 | 0 | 0 | 250  | 4.166667 | 0.258916 | 4.356028 | Unclassified | chr17:24852784-24857002   | 2.219   |
| 4921517D21Rik | 0 | 0 | 0 | 15   | 0.25     | 0.044936 | 0.427898 | Unclassified | chr9:107828799-107834792  | 3.994   |
| Nkap          | 0 | 0 | 0 | 217  | 3.616667 | 4.41719  | 19.34813 | Stalled      | chrX:34664757-34690741    | 23.985  |
| Ccdc50        | 0 | 0 | 0 | 657  | 10.95    | 9.30737  | 17.0115  | Unclassified | chr16:27387062-27452304   | 63.243  |
| Ubxn2a        | 0 | 0 | 0 | 441  | 7.35     | 4.12065  | 33.68187 | Unclassified | chr12:4885837-4916326     | 28.49   |
| Rundc3b       | 0 | 0 | 0 | 128  | 2.133333 | 1.82015  | 13.1837  | Stalled      | chr5:8490335-8624952      | 132.618 |
| Proz          | 0 | 0 | 0 | 149  | 2.483333 | 0.561182 | 0.250159 | Unclassified | chr8:13058907-13075006    | 14.1    |
| 6330409N04Rik | 0 | 0 | 0 | 248  | 4.133333 | 4.8336   | 49.16276 | Stalled      | chr14:62153141-62177723   | 22.583  |
| Ccnh          | 0 | 0 | 0 | 285  | 4.75     | 8.88452  | 17.75199 | Unclassified | chr13:85327081-85353328   | 24.248  |
| Lmo1          | 0 | 0 | 0 | 54   | 0.9      | 0.155567 | 0.761426 | Unclassified | chr7:116282085-116315822  | 31.738  |
| Mt3           | 0 | 0 | 0 | 2    | 0.033333 | 0.453646 | 2        | Unclassified | chr8:96674506-96678046    | 1.541   |
| C86695        | 0 | 0 | 0 | 4    | 0.066667 | 0        | 0        | Unclassified | chr8:23067185-23074775    | 5.591   |
| Lmo3          | 0 | 0 | 0 | 126  | 2.1      | 0.0244   | 0.633956 | Unclassified | chr6:138313001-138532489  | 217.489 |
| Fam70b        | 0 | 0 | 0 | 56   | 0.933333 | 0        | 0.666524 | Unclassified | chr8:13433458-13461449    | 25.992  |
| Apcs          | 0 | 0 | 0 | 4    | 0.066667 | 0.052152 | 3        | Unclassified | chr1:174824092-174827185  | 1.094   |
| Jph4          | 0 | 0 | 0 | 35   | 0.583333 | 0.469158 | 0        | Unclassified | chr14:55725662-55737115   | 9.454   |
| Mt4           | 0 | 0 | 0 | 6    | 0.1      | 0        | 0.171671 | Unclassified | chr8:96659103-96662931    | 1.829   |
| Tbc1d8b       | 0 | 0 | 0 | 118  | 1.966667 | 1.39276  | 27.45348 | Stalled      | chrX:136217534-136288757  | 69.224  |
| Dsg4          | 0 | 0 | 0 | 24   | 0.4      | 0.011055 | 0        | Unclassified | chr18:20592675-20630322   | 35.648  |
| Ptprc         | 0 | 0 | 0 | 1923 | 32.05    | 38.3865  | 5.518722 | Unclassified | chr1:139959437-140073882  | 112.446 |
| Rgs4          | 0 | 0 | 0 | 8    | 0.133333 | 0.043578 | 0.925405 | Unclassified | chr1:171671607-171679773  | 6.167   |
| Mum11         | 0 | 0 | 0 | 10   | 0.166667 | 0.068006 | 6.306771 | Unclassified | chrX:135742582-135772874  | 28.293  |
| Rps15a        | 0 | 0 | 0 | 1883 | 31.38333 | 6.32319  | 4.591757 | Unclassified | chr7:125247889-125261661  | 11.773  |
| Sntn          | 0 | 0 | 0 | 5    | 0.083333 | 0        | 0.738117 | Unclassified | chr14:14501389-14515662   | 12.274  |
| Papolg        | 0 | 0 | 0 | 307  | 5.116667 | 5.51242  | 26.50476 | Stalled      | chr11:23762646-23797270   | 32.625  |
| Loxl2         | 0 | 0 | 0 | 132  | 2.2      | 0.051968 | 1.600289 | Unclassified | chr14:70007282-700995640  | 86.359  |
| Usp11         | 0 | 0 | 0 | 300  | 5        | 5.19337  | 14.13707 | Unclassified | chrX:20279034-20297665    | 16.632  |
| Xylt2         | 0 | 0 | 0 | 652  | 10.86667 | 6.78923  | 3.263056 | Unclassified | chr11:94525160-94540807   | 13.648  |
| Nrcam         | 0 | 0 | 0 | 194  | 3.233333 | 0.150487 | 2.380613 | Unclassified | chr12:45427871-45702833   | 272.963 |
| Syt15         | 0 | 0 | 0 | 45   | 0.75     | 0.057942 | 0.182514 | Unclassified | chr14:35031231-35043607   | 10.377  |
| Ranbp17       | 0 | 0 | 0 | 244  | 4.066667 | 0.039055 | 11.9913  | Stalled      | chr11:33111793-33415746   | 301.954 |
| Spata20       | 0 | 0 | 0 | 13   | 0.216667 | 0.069304 | 0.435848 | Unclassified | chr11:94340217-94348624   | 6.408   |
| Gramd1c       | 0 | 0 | 0 | 135  | 2.25     | 1.61649  | 9.474881 | Unclassified | chr16:43980467-44018472   | 36.006  |
| Kihdc7a       | 0 | 0 | 0 | 7    | 0.116667 | 0.030651 | 0        | Unclassified | chr4:139518087-139525941  | 5.855   |
| Foxn4         | 0 | 0 | 0 | 38   | 0.633333 | 0.012946 | 0        | Unclassified | chr5:114704172-114725770  | 19.599  |
| Hoxc5         | 0 | 0 | 0 | 6    | 0.1      | 0.12206  | 0.893601 | Unclassified | chr15:102842438-102847860 | 3.423   |
| Hoxc9         | 0 | 0 | 0 | 18   | 0.3      | 0.678467 | 0.99114  | Unclassified | chr15:102805462-102814875 | 7.414   |
| Hmgb3         | 0 | 0 | 0 | 225  | 3.75     | 7.97051  | 22.3642  | Stalled      | chrX:68807167-68813829    | 4.663   |
| Hmg20b        | 0 | 0 | 0 | 251  | 4.183333 | 24.03    | 3.956519 | Unclassified | chr10:80808792-80815172   | 4.381   |
| Hoxc4         | 0 | 0 | 0 | 4    | 0.066667 | 0.380964 | 0        | Unclassified | chr15:102862825-102867283 | 2.459   |
| AU021092      | 0 | 0 | 0 | 19   | 0.316667 | 0.074785 | 0        | Unclassified | chr16:5211912-5224392     | 10.481  |
| Krtap13-1     | 0 | 0 | 0 | 1    | 0.016667 | 0        | 1        | Unclassified | chr16:88727106-88729856   | 0.751   |
| Nrip1         | 0 | 0 | 0 | 996  | 16.6     | 1.79404  | 21.15703 | Unclassified | chr16:76291106-76375294   | 82.189  |
| Robo2         | 0 | 0 | 0 | 218  | 3.633333 | 0.02389  | 1.416924 | Unclassified | chr16:73892550-74413157   | 518.608 |
| Adamts13      | 0 | 0 | 0 | 129  | 2.15     | 0.145513 | 3.485921 | Unclassified | chr2:26826935-26865145    | 36.211  |
| Gm711         | 0 | 0 | 0 | 652  | 10.86667 | 0.189084 | 4.628143 | Unclassified | chr2:26787588-26809016    | 19.429  |
| R3hdml        | 0 | 0 | 0 | 12   | 0.2      | 0.093721 | 0        | Unclassified | chr2:163316053-163328348  | 10.296  |
| Tyrobp        | 0 | 0 | 0 | 54   | 0.9      | 1.69828  | 0.495902 | Unclassified | chr7:31196806-31202598    | 3.793   |
| Sic8a3        | 0 | 0 | 0 | 111  | 1.85     | 0.049264 | 0.551933 | Unclassified | chr12:82298901-82436167   | 135.267 |
| Sic8a2        | 0 | 0 | 0 | 106  | 1.766667 | 0.111973 | 0.830977 | Unclassified | chr7:16713648-16745860    | 30.213  |
| Atp8a2        | 0 | 0 | 0 | 405  | 6.75     | 0.048692 | 1.044208 | Unclassified | chr14:60266577-60707671   | 439.095 |
| Dlc1          | 0 | 0 | 0 | 45   | 0.75     | 0.084097 | 2.65068  | Unclassified | chr8:37630798-37678928    | 46.131  |
| Sic9a4        | 0 | 0 | 0 | 36   | 0.6      | 0.04024  | 2.49068  | Unclassified | chr1:40635071-40687576    | 50.506  |
| Solh          | 0 | 0 | 0 | 131  | 2.183333 | 10.0391  | 0.559917 | Unclassified | chr17:26096500-26104450   | 5.951   |
| Fbxo17        | 0 | 0 | 0 | 91   | 1.516667 | 0.652538 | 3.70623  | Unclassified | chr7:29499808-29523159    | 21.352  |
| 4930402H24Rik | 0 | 0 | 0 | 403  | 6.716667 | 0.865064 | 15.22216 | Stalled      | chr2:130533588-130667846  | 132.259 |
| Uaca          | 0 | 0 | 0 | 121  | 2.016667 | 0.159191 | 2.143926 | Unclassified | chr9:60640354-60728177    | 85.824  |
| Sic30a8       | 0 | 0 | 0 | 21   | 0.35     | 0.013448 | 0.673439 | Unclassified | chr15:52125107-52167288   | 40.182  |
| Naalad2       | 0 | 0 | 0 | 39   | 0.65     | 0.047644 | 0.619654 | Unclassified | chr9:18127464-18192372    | 62.909  |
| Bbs5          | 0 | 0 | 0 | 72   | 1.2      | 3.20508  | 11.87259 | Stalled      | chr2:69483311-69505626    | 20.316  |
| Lin9          | 0 | 0 | 0 | 772  | 12.86667 | 2.05565  | 38.22618 | Unclassified | chr1:182569464-182620818  | 49.355  |
| Pat1          | 0 | 0 | 0 | 703  | 11.71667 | 7.03852  | 19.702   | Unclassified | chr19:11984888-12019585   | 32.698  |
| Plac1l        | 0 | 0 | 0 | 6    | 0.1      | 0.170863 | 0        | Unclassified | chr19:11721773-11737049   | 13.277  |
| Gm97          | 0 | 0 | 0 | 12   | 0.2      | 0        | 0.57992  | Unclassified | chr19:11769544-11786348   | 14.805  |
| A3galt2       | 0 | 0 | 0 | 38   | 0.633333 | 0.117094 | 1.220506 | Unclassified | chr4:128434501-128446542  | 10.042  |
| Phf21a        | 0 | 0 | 0 | 1179 | 19.65    | 4.15257  | 25.97964 | Unclassified | chr2:92022338-92204823    | 180.486 |
| Defa-ps1      | 0 | 0 | 0 | 1    | 0.016667 | 0        | 0        | Unclassified | chr8:22803483-22806325    | 0.843   |
| Hbs1l         | 0 | 0 | 0 | 1092 | 18.2     | 13.1119  | 8.067511 | Unclassified | chr10:21013784-21088695   | 72.912  |
| Stub1         | 0 | 0 | 0 | 445  | 7.416667 | 27.2708  | 3.418001 | Unclassified | chr17:25967580-25972306   | 2.727   |
| Tubd1         | 0 | 0 | 0 | 435  | 7.25     | 5.65256  | 51.24101 | Stalled      | chr11:86356509-86380862   | 22.354  |
| Pygl          | 0 | 0 | 0 | 56   | 0.933333 | 1.29453  | 7.665554 | Unclassified | chr12:71291801-71330670   | 36.87   |
| Phka2         | 0 | 0 | 0 | 240  | 4        | 2.67893  | 30.59734 | Stalled      | chrX:156938621-157029654  | 89.034  |
| Ptger3        | 0 | 0 | 0 | 48   | 0.8      | 0.342601 | 0.625614 | Unclassified | chr3:157227855-157307722  | 77.868  |
| Bves          | 0 | 0 | 0 | 52   | 0.866667 | 0.023926 | 0.40206  | Unclassified | chr10:45053567-45089514   | 33.948  |
| Pter          | 0 | 0 | 0 | 146  | 2.433333 | 0.936203 | 14.45702 | Stalled      | chr2:12843667-12925080    | 79.414  |
| Ptf1a         | 0 | 0 | 0 | 7    | 0.116667 | 0.127653 | 3        | Unclassified | chr2:19365289-19369126    | 1.838   |
| Ptldr         | 0 | 0 | 0 | 8    | 0.133333 | 0.036183 | 3.521002 | Unclassified | chr14:45470909-45481050   | 8.142   |
| Ptgd3         | 0 | 0 | 0 | 28   | 0.466667 | 0.047763 | 0.904263 | Unclassified | chr2:25322231-25327269    | 3.039   |
| Ptpn3         | 0 | 0 | 0 | 354  | 5.9      | 0.571437 | 6.651073 | Unclassified | chr4:57203712-57316709    | 110.998 |
| Samd1         | 0 | 0 | 0 | 304  | 5.066667 | 19.2249  | 2.110957 | Elongating   | chr8:86519570-86524285    | 2.716   |
| Wnt5a         | 0 | 0 | 0 | 16   | 0.266667 | 0.077984 | 0        | Unclassified | chr14:29316658-29338620   | 19.963  |
| Wnt3a         | 0 | 0 | 0 | 75   | 1.25     | 0.027973 | 0.733609 | Unclassified | chr11:59061545-59106253   | 42.709  |
| Wnt4          | 0 | 0 | 0 | 117  | 1.95     | 0.034922 | 0.274636 | Unclassified | chr4:136831549-136852694  | 19.146  |
| Wnt3          | 0 | 0 | 0 | 80   | 1.333333 | 0.218063 | 2.238507 | Unclassified | chr11:103633488-103679335 | 43.848  |

|               |   |          |   |      |          |          |          |              |                           |         |
|---------------|---|----------|---|------|----------|----------|----------|--------------|---------------------------|---------|
| Tub           | 0 | 0        | 0 | 35   | 0.583333 | 0.038831 | 1.241146 | Unclassified | chr7:116152393-116177973  | 23.581  |
| 3300002I08Rik | 0 | 0        | 0 | 310  | 5.166667 | 11.8903  | 5.163901 | Unclassified | chr2:150136672-150190501  | 51.83   |
| Sec62         | 0 | 0        | 0 | 400  | 6.666667 | 14.1806  | 13.43133 | Unclassified | chr3:30689797-30720185    | 28.389  |
| Kti12         | 0 | 0        | 0 | 227  | 3.783333 | 35.1657  | 12.36765 | Unclassified | chr4:108518461-108522017  | 1.557   |
| Slc7a6        | 0 | 0        | 0 | 738  | 12.3     | 6.44529  | 24.78755 | Unclassified | chr8:108690774-108722604  | 29.831  |
| Tnks1bp1      | 0 | 0        | 0 | 277  | 4.616667 | 3.97023  | 1.446889 | Elongating   | chr2:84888616-84913205    | 22.59   |
| Thbs4         | 0 | 0        | 0 | 49   | 0.186667 | 0.073423 | 0.468044 | Unclassified | chr13:93521541-93566773   | 43.233  |
| 4930550L24Rik | 0 | 0        | 0 | 2    | 0.033333 | 0.016306 | 0.886942 | Unclassified | chrX:56162637-56173481    | 8.845   |
| Dse           | 0 | 0        | 0 | 221  | 3.683333 | 2.04084  | 16.42329 | Stalled      | chr10:33871198-33929357   | 56.16   |
| Spag4l        | 0 | 0        | 0 | 21   | 0.35     | 0.044386 | 1.349301 | Unclassified | chr2:153681925-153698820  | 14.896  |
| Tgtp          | 0 | 0        | 0 | 7    | 0.116667 | 1.7106   | 1.193467 | Unclassified | chr11:48798830-48807748   | 6.919   |
| Ift88         | 0 | 0        | 0 | 239  | 3.983333 | 1.26892  | 47.53282 | Stalled      | chr14:58040907-58136774   | 93.868  |
| Thbs2         | 0 | 0        | 0 | 36   | 0.6      | 0.019478 | 1.370746 | Unclassified | chr17:14802506-14833269   | 28.764  |
| Thbs1         | 0 | 0        | 0 | 26   | 0.433333 | 0.258447 | 1.17745  | Unclassified | chr2:117935657-117952869  | 15.213  |
| Enox2         | 0 | 0        | 0 | 334  | 5.566667 | 2.11657  | 67.92532 | Stalled      | chrX:46363698-46643419    | 277.722 |
| Mrpl19        | 0 | 0        | 0 | 319  | 5.316667 | 6.14632  | 3.287754 | Unclassified | chr6:81907839-81917943    | 8.105   |
| Wbscr16       | 0 | 0        | 0 | 790  | 13.16667 | 9.38061  | 6.471764 | Unclassified | chr5:134623927-134654637  | 28.711  |
| Mrpl37        | 0 | 0        | 0 | 484  | 8.066667 | 23.8804  | 13.32574 | Unclassified | chr4:106728478-106741471  | 10.994  |
| Rabgap1l      | 0 | 45.90295 | 0 | 5465 | 91.08333 | 11.2792  | 40.25572 | Unclassified | chr1:162149304-162725069  | 573.766 |
| Olfr216       | 0 | 0        | 0 | 1    | 0.016667 | 0        | 0        | Unclassified | chr11:58477062-58480046   | 0.985   |
| E130203B14Rik | 0 | 0        | 0 | 102  | 1.7      | 0.112137 | 1.364258 | Unclassified | chr14:33667941-33752675   | 82.735  |
| Tmco7         | 0 | 0        | 0 | 1072 | 17.86667 | 2.8832   | 35.24956 | Unclassified | chr8:109204967-109375339  | 168.373 |
| Ace           | 0 | 0        | 0 | 45   | 0.75     | 0.120686 | 1.05     | Unclassified | chr11:105827260-105851259 | 22      |
| Apoc4         | 0 | 0        | 0 | 9    | 0.15     | 0        | 0.249249 | Unclassified | chr7:20263442-20266765    | 3.324   |
| Ttyh1         | 0 | 0        | 0 | 94   | 1.566667 | 0.305063 | 0.300067 | Unclassified | chr7:4069134-4087843      | 16.71   |
| Usp29         | 0 | 0        | 0 | 148  | 2.466667 | 0.052533 | 1.234562 | Unclassified | chr7:6681451-6919931      | 236.481 |
| Mog           | 0 | 0        | 0 | 18   | 0.3      | 0.060065 | 1.478445 | Unclassified | chr17:37147684-37162343   | 12.66   |
| Mab211l       | 0 | 0        | 0 | 10   | 0.166667 | 0.858113 | 0.457385 | Unclassified | chr3:55584431-55589209    | 2.779   |
| Carhsp1       | 0 | 0        | 0 | 557  | 9.283333 | 7.92481  | 7.170078 | Unclassified | chr16:8658679-8674246     | 13.568  |
| Lyz1          | 0 | 0        | 0 | 5    | 0.083333 | 0.581733 | 0.575912 | Unclassified | chr10:116724851-116731924 | 5.074   |
| Zfp870        | 0 | 0        | 0 | 223  | 3.716667 | 1.71548  | 10.54959 | Unclassified | chr17:33016165-33030548   | 12.384  |
| Dgcr6         | 0 | 0        | 0 | 129  | 2.15     | 11.0662  | 0.757517 | Unclassified | chr16:18050952-18071435   | 18.484  |
| Zfp811        | 0 | 0        | 0 | 27   | 0.45     | 0.413966 | 2.655518 | Unclassified | chr17:32933955-32948864   | 12.91   |
| Rad54l2       | 0 | 0        | 0 | 874  | 14.56667 | 4.59272  | 20.37578 | Unclassified | chr9:106590410-106693544  | 101.135 |
| Dgcr2         | 0 | 0        | 0 | 1051 | 17.51667 | 16.2956  | 13.73179 | Unclassified | chr16:17840450-17893821   | 51.372  |
| Dmrtc1b       | 0 | 0        | 0 | 2    | 0.033333 | 0        | 0        | Unclassified | chrX:99901219-99910547    | 7.329   |
| Zfp563        | 0 | 0        | 0 | 216  | 3.6      | 1.58386  | 6.379898 | Unclassified | chr17:33224311-33247649   | 21.339  |
| Morc2b        | 0 | 0        | 0 | 6    | 0.1      | 0.124259 | 0        | Unclassified | chr17:33272534-33278628   | 4.095   |
| Rcan2         | 0 | 0        | 0 | 194  | 3.233333 | 0.236894 | 1.671901 | Unclassified | chr17:43936799-44176465   | 237.667 |
| Rcan3         | 0 | 0        | 0 | 266  | 4.433333 | 1.76228  | 25.42154 | Stalled      | chr4:134968223-134991720  | 21.498  |
| Phgr1         | 0 | 0        | 0 | 12   | 0.2      | 0        | 1.543213 | Unclassified | chr2:118596504-118603900  | 5.397   |
| Gmds          | 0 | 0        | 0 | 1457 | 24.28333 | 11.1759  | 42.00535 | Stalled      | chr13:31911454-32432413   | 518.96  |
| Tcf15         | 0 | 0        | 0 | 21   | 0.35     | 0.040687 | 0        | Unclassified | chr2:180356663-180379396  | 20.734  |
| Ccdc67        | 0 | 0        | 0 | 112  | 1.866667 | 0.09321  | 2.338721 | Unclassified | chr9:15364307-15434377    | 68.071  |
| A130022J15Rik | 0 | 0        | 0 | 257  | 4.283333 | 1.91509  | 17.32142 | Stalled      | chr6:97060937-97100877    | 37.941  |
| Mmrn2         | 0 | 0        | 0 | 33   | 0.55     | 0.022805 | 1.579115 | Unclassified | chr14:35186689-35217472   | 28.784  |
| Oas1h         | 0 | 0        | 0 | 13   | 0.216667 | 0.086829 | 0        | Unclassified | chr5:121309430-121323512  | 12.083  |
| Oas2          | 0 | 0        | 0 | 146  | 2.433333 | 2.19264  | 4.390591 | Unclassified | chr5:121180342-121201857  | 19.516  |
| 4930567H17Rik | 0 | 0        | 0 | 1    | 0.016667 | 0.044402 | 0        | Unclassified | chrX:67647075-67649915    | 0.841   |
| Ngb           | 0 | 0        | 0 | 29   | 0.483333 | 0.301154 | 2.894503 | Unclassified | chr12:88438480-88445489   | 5.01    |
| Cox7a2l       | 0 | 0        | 0 | 387  | 6.45     | 95.752   | 5.999321 | Unclassified | chr17:83901256-83915673   | 12.418  |
| Sftpd         | 0 | 0        | 0 | 8    | 0.133333 | 0.203127 | 0.631327 | Unclassified | chr14:41985501-42000487   | 12.987  |
| Agbl2         | 0 | 0        | 0 | 184  | 3.066667 | 0.05553  | 19.09505 | Stalled      | chr2:90620900-90656388    | 33.489  |
| Wfikkn2       | 0 | 0        | 0 | 28   | 0.466667 | 0.20015  | 0.658902 | Unclassified | chr11:94097265-94105893   | 6.629   |
| Sim2          | 0 | 0        | 0 | 93   | 1.55     | 0.202547 | 4.557086 | Unclassified | chr16:94083504-94348638   | 263.135 |
| Olfr1188      | 0 | 0        | 0 | 0    | 0        | 0        | 0        | Unclassified | chr2:88397627-88400566    | 0.94    |
| Sin3b         | 0 | 0        | 0 | 734  | 12.23333 | 56.3181  | 11.38767 | Unclassified | chr8:75245186-75282102    | 34.917  |
| Hist1h2bp     | 0 | 0        | 0 | 318  | 5.3      | 0        | 94.71627 | Unclassified | chr13:21877356-21881082   | 1.727   |
| Timp2         | 0 | 0        | 0 | 113  | 1.883333 | 0.290154 | 3.051553 | Unclassified | chr11:118162374-118218725 | 54.352  |
| Pramel5       | 0 | 0        | 0 | 4    | 0.066667 | 0.022805 | 0        | Unclassified | chr4:143860535-143872369  | 9.835   |
| Zfp429        | 0 | 0        | 0 | 135  | 2.25     | 1.93803  | 16.46947 | Stalled      | chr13:67490264-67502703   | 10.44   |
| Slc36a4       | 0 | 0        | 0 | 212  | 3.533333 | 1.58798  | 17.56036 | Stalled      | chr9:15512212-15543233    | 29.022  |
| Duox1         | 0 | 0        | 0 | 46   | 0.766667 | 0.041355 | 0.410238 | Unclassified | chr2:122139407-122173708  | 32.302  |
| Gemin5        | 0 | 0        | 0 | 1041 | 17.35    | 9.07303  | 11.41104 | Unclassified | chr11:57933503-57984041   | 48.539  |
| Mrpl22        | 0 | 0        | 0 | 193  | 3.216667 | 10.1169  | 6.645461 | Unclassified | chr11:57983155-57993080   | 7.926   |
| Olfr286       | 0 | 0        | 0 | 5    | 0.083333 | 0        | 0        | Unclassified | chr15:98057105-98066881   | 7.777   |
| 8430419L09Rik | 0 | 0        | 0 | 251  | 4.183333 | 2.61296  | 8.020099 | Unclassified | chr6:135146004-135186257  | 38.254  |
| Hist3h2ba     | 0 | 0        | 0 | 79   | 1.316667 | 7.7475   | 49       | Unclassified | chr11:58760412-58763032   | 0.621   |
| Pgpep1        | 0 | 0        | 0 | 263  | 4.383333 | 10.281   | 6.527585 | Unclassified | chr8:73173009-73185580    | 10.572  |
| Lhfp13        | 0 | 0        | 0 | 312  | 5.2      | 0.09669  | 2.527029 | Unclassified | chr5:22250010-22781414    | 529.405 |
| Plscr2        | 0 | 0        | 0 | 49   | 0.186667 | 0.023406 | 7.172563 | Unclassified | chr9:92168557-92192567    | 22.011  |
| Arg2          | 0 | 0        | 0 | 142  | 2.366667 | 1.02859  | 3.416252 | Unclassified | chr12:80229774-80257287   | 25.514  |
| Arg1          | 0 | 0        | 0 | 135  | 2.25     | 1.2059   | 0.581344 | Unclassified | chr10:24635012-24649276   | 12.265  |
| Arf6          | 0 | 0        | 0 | 915  | 15.25    | 52.8334  | 10.41337 | Unclassified | chr12:70471136-70476967   | 3.832   |
| Arf5          | 0 | 0        | 0 | 170  | 2.833333 | 61.0775  | 6.483506 | Unclassified | chr6:28371639-28376499    | 2.861   |
| Pip1          | 0 | 0        | 0 | 11   | 0.183333 | 0.287271 | 0        | Unclassified | chrX:133355374-133372281  | 14.908  |
| Arf2          | 0 | 0        | 0 | 227  | 3.783333 | 6.5537   | 13.65582 | Stalled      | chr11:103826184-103846650 | 18.467  |
| Hcn3          | 0 | 0        | 0 | 78   | 1.3      | 0.97851  | 4.962811 | Unclassified | chr3:88950696-88966079    | 13.384  |
| Ankrd9        | 0 | 0        | 0 | 191  | 3.183333 | 2.07384  | 7.723377 | Unclassified | chr12:112213562-112219231 | 3.67    |
| Serpind1      | 0 | 0        | 0 | 77   | 1.283333 | 0        | 0.545138 | Unclassified | chr16:17329463-17343665   | 12.203  |
| Hcfc1         | 0 | 0        | 0 | 1558 | 25.96667 | 28.9204  | 5.146626 | Unclassified | chrX:71188133-71213654    | 23.522  |
| Fetub         | 0 | 0        | 0 | 30   | 0.5      | 0.258239 | 0.421344 | Unclassified | chr16:22916454-22939841   | 21.388  |
| Hcn1          | 0 | 0        | 0 | 156  | 2.6      | 0.038642 | 2.139152 | Unclassified | chr13:118389126-118769835 | 378.71  |
| Hcn2          | 0 | 0        | 0 | 115  | 1.916667 | 0.645608 | 1.237135 | Unclassified | chr10:79177378-79198853   | 19.476  |
| Nfasc         | 0 | 0        | 0 | 279  | 4.65     | 0.068786 | 0.39039  | Unclassified | chr1:134461267-134640374  | 177.108 |
| Ankrd61       | 0 | 0        | 0 | 55   | 0.916667 | 0        | 1.739636 | Unclassified | chr5:144651611-144657936  | 4.326   |



|               |   |   |   |      |          |          |          |              |                           |          |
|---------------|---|---|---|------|----------|----------|----------|--------------|---------------------------|----------|
| Plcb1         | 0 | 0 | 0 | 410  | 6.833333 | 0.018314 | 1.25554  | Unclassified | chr2:134609899-135300994  | 689.096  |
| Plcb3         | 0 | 0 | 0 | 199  | 3.316667 | 3.97389  | 6.565302 | Unclassified | chr19:7028202-7046242     | 16.041   |
| Plau          | 0 | 0 | 0 | 79   | 1.316667 | 0.542508 | 16.30413 | Stalled      | chr14:21653883-21662610   | 6.728    |
| Mark1         | 0 | 0 | 0 | 104  | 1.733333 | 0.158213 | 0        | Unclassified | chr1:186720302-186825428  | 103.127  |
| Plcb4         | 0 | 0 | 0 | 261  | 4.35     | 0.131816 | 0        | Unclassified | chr2:135565565-135838804  | 271.24   |
| Rab11fip2     | 0 | 0 | 0 | 411  | 6.85     | 1.99564  | 32.32638 | Stalled      | chr19:59978788-60021267   | 40.48    |
| Gm5483        | 0 | 0 | 0 | 3    | 0.05     | 0.046512 | 2        | Unclassified | chr16:36182297-36188196   | 3.9      |
| P2ry1         | 0 | 0 | 0 | 11   | 0.183333 | 1.11786  | 3.054781 | Unclassified | chr3:60804716-60812901    | 6.186    |
| Ndufb8        | 0 | 0 | 0 | 326  | 5.433333 | 89.2058  | 9.126097 | Unclassified | chr19:44624743-44631905   | 5.163    |
| Scd3          | 0 | 0 | 0 | 41   | 0.683333 | 4.58625  | 0.504636 | Unclassified | chr19:44275777-44318506   | 40.73    |
| Zswim6        | 0 | 0 | 0 | 1221 | 20.35    | 1.54749  | 39.38139 | Unclassified | chr13:108514697-108682258 | 165.562  |
| Lass4         | 0 | 0 | 0 | 336  | 5.6      | 3.81555  | 14.16916 | Unclassified | chr8:4491404-4526079      | 32.676   |
| Zfp292        | 0 | 0 | 0 | 1076 | 17.93333 | 3.37154  | 28.14205 | Unclassified | chr4:34750358-34832197    | 79.84    |
| Tpbp          | 0 | 0 | 0 | 21   | 0.35     | 1.3255   | 2.900529 | Unclassified | chr9:85733986-85740662    | 4.677    |
| 2900073G15Rik | 0 | 0 | 0 | 450  | 7.5      | 44.1592  | 16.75809 | Unclassified | chr17:71343132-71353873   | 8.742    |
| Dnajc12       | 0 | 0 | 0 | 83   | 1.383333 | 5.43792  | 36.63288 | Stalled      | chr10:62847364-62871569   | 22.206   |
| Fndc3b        | 0 | 0 | 0 | 1931 | 32.18333 | 1.68466  | 6.176425 | Unclassified | chr3:27315083-27611361    | 294.279  |
| Myom2         | 0 | 0 | 0 | 76   | 1.266667 | 0.031051 | 1.005162 | Unclassified | chr8:15055652-15133419    | 75.768   |
| Tmem202       | 0 | 0 | 0 | 6    | 0.1      | 0.071429 | 0        | Unclassified | chr9:59366491-59375308    | 6.818    |
| Xkr9          | 0 | 0 | 0 | 45   | 0.75     | 0.026618 | 0.426315 | Unclassified | chr1:13656851-13691804    | 32.954   |
| V1rd15        | 0 | 0 | 0 | 1    | 0.016667 | 0        | 1        | Unclassified | chr7:24837792-24840710    | 0.919    |
| Bcl2l15       | 0 | 0 | 0 | 75   | 1.25     | 1.14906  | 0.220413 | Unclassified | chr3:103634618-103658539  | 21.922   |
| Cmklr1        | 0 | 0 | 0 | 64   | 1.066667 | 0.126136 | 0        | Unclassified | chr5:114062363-114102399  | 38.037   |
| Ube3b         | 0 | 0 | 0 | 852  | 14.2     | 10.4964  | 13.05421 | Unclassified | chr5:114828615-114871175  | 40.561   |
| Hspbp1        | 0 | 0 | 0 | 448  | 7.466667 | 24.1423  | 6.870887 | Unclassified | chr7:4612122-4638565      | 24.444   |
| Sdccag1       | 0 | 0 | 0 | 1036 | 17.26667 | 14.6626  | 10.89013 | Unclassified | chr12:70412529-70460153   | 45.625   |
| Mrps16        | 0 | 0 | 0 | 389  | 6.483333 | 39.8092  | 19.02384 | Stalled      | chr14:21210452-21214777   | 2.326    |
| Kcne11        | 0 | 0 | 0 | 2    | 0.033333 | 0.05318  | 0.308915 | Unclassified | chrX:138739295-138742741  | 1.447    |
| Cyb56d1       | 0 | 0 | 0 | 432  | 7.2      | 3.65684  | 9.286356 | Unclassified | chr3:107998688-108005752  | 5.065    |
| Zfp654        | 0 | 0 | 0 | 21   | 0.35     | 0.748032 | 1.99359  | Unclassified | chr16:64780172-64788147   | 5.976    |
| Mcf2          | 0 | 0 | 0 | 21   | 0.35     | 0.070926 | 0        | Unclassified | chrX:57309132-57402820    | 91.689   |
| Cela1         | 0 | 0 | 0 | 76   | 1.266667 | 0.231438 | 2.927928 | Unclassified | chr15:100504852-100520351 | 13.5     |
| AF251705      | 0 | 0 | 0 | 9    | 0.15     | 0.157055 | 0.813408 | Unclassified | chr11:114858082-114865194 | 5.113    |
| Evc2          | 0 | 0 | 0 | 91   | 1.516667 | 0.028058 | 0.986047 | Unclassified | chr5:37727716-37816293    | 86.578   |
| Fam189b       | 0 | 0 | 0 | 180  | 3        | 1.89317  | 4.568079 | Unclassified | chr3:88985146-88993211    | 6.066    |
| Kcnmb2        | 0 | 0 | 0 | 203  | 3.383333 | 0.035125 | 0.597163 | Unclassified | chr3:31799624-32099102    | 297.479  |
| Sfxn4         | 0 | 0 | 0 | 234  | 3.9      | 1.11665  | 21.69297 | Stalled      | chr19:60913179-60939333   | 24.155   |
| 4930432K09Rik | 0 | 0 | 0 | 13   | 0.216667 | 0        | 0        | Unclassified | chr5:88252721-88275411    | 20.691   |
| Tmem161b      | 0 | 0 | 0 | 399  | 6.65     | 2.1965   | 20.58233 | Stalled      | chr13:84359900-84435571   | 73.672   |
| Utp6          | 0 | 0 | 0 | 493  | 8.216667 | 12.6255  | 17.81521 | Unclassified | chr11:79747457-79777889   | 28.433   |
| 4930590J08Rik | 0 | 0 | 0 | 127  | 2.116667 | 0.026425 | 4.501364 | Unclassified | chr6:91852226-91900719    | 46.494   |
| Parg          | 0 | 0 | 0 | 733  | 12.21667 | 6.62717  | 47.94394 | Stalled      | chr14:33013156-33110735   | 95.58    |
| Git2          | 0 | 0 | 0 | 1155 | 19.25    | 8.80235  | 10.13964 | Unclassified | chr5:115177416-115225500  | 46.085   |
| 2210404J11Rik | 0 | 0 | 0 | 102  | 1.7      | 2.18216  | 0.176331 | Unclassified | chr17:15176575-15201196   | 22.622   |
| BC049807      | 0 | 0 | 0 | 67   | 1.116667 | 0.552655 | 6.807605 | Unclassified | chr17:21702009-21725649   | 21.641   |
| Anks1b        | 0 | 0 | 0 | 715  | 11.91667 | 0.404118 | 1.217641 | Unclassified | chr10:89334253-90436049   | 1099.797 |
| Trpm1         | 0 | 0 | 0 | 137  | 2.283333 | 0.087193 | 0.45984  | Unclassified | chr7:71296720-71414645    | 115.926  |
| Daam1         | 0 | 0 | 0 | 845  | 14.08333 | 3.00301  | 13.81983 | Unclassified | chr12:72930064-73093354   | 161.291  |
| Acvr1         | 0 | 0 | 0 | 184  | 3.066667 | 0.21751  | 7.775391 | Unclassified | chr2:58298848-58421239    | 120.392  |
| Tm2d2         | 0 | 0 | 0 | 301  | 5.016667 | 19.5804  | 21.60369 | Stalled      | chr8:26125682-26133731    | 6.05     |
| Npr2          | 0 | 0 | 0 | 38   | 0.633333 | 0.070014 | 1.049974 | Unclassified | chr4:43642806-43664112    | 19.307   |
| Krt77         | 0 | 0 | 0 | 19   | 0.316667 | 0.111835 | 0        | Unclassified | chr15:101690286-101702049 | 9.764    |
| Krt40         | 0 | 0 | 0 | 5    | 0.083333 | 0        | 1.400749 | Unclassified | chr11:99398798-99406472   | 5.675    |
| Krt74         | 0 | 0 | 0 | 13   | 0.216667 | 0.086131 | 0.894233 | Unclassified | chr15:101584782-101595868 | 9.087    |
| Gm5414        | 0 | 0 | 0 | 3    | 0.05     | 0.007707 | 0.612553 | Unclassified | chr15:101454458-101460619 | 4.162    |
| Qrfrp         | 0 | 0 | 0 | 47   | 0.783333 | 0.021332 | 0.963743 | Unclassified | chr3:36078347-36123197    | 42.851   |
| Acta2         | 0 | 0 | 0 | 161  | 2.683333 | 0        | 0.194456 | Unclassified | chr19:34315580-34331826   | 14.247   |
| Psg16         | 0 | 0 | 0 | 40   | 0.666667 | 0.044911 | 3.423095 | Unclassified | chr7:17657388-17684320    | 24.933   |
| Slc30a10      | 0 | 0 | 0 | 19   | 0.316667 | 0.133923 | 1.439532 | Unclassified | chr1:187276726-187292640  | 13.915   |
| Atp11b        | 0 | 0 | 0 | 956  | 15.93333 | 9.19197  | 34.41033 | Unclassified | chr3:35651059-35755198    | 102.14   |
| 2410022L05Rik | 0 | 0 | 0 | 65   | 1.083333 | 4.32848  | 3.35014  | Unclassified | chr8:13884787-13892271    | 5.485    |
| Ttc19         | 0 | 0 | 0 | 891  | 14.85    | 6.54581  | 20.54117 | Unclassified | chr11:62092974-62129926   | 34.953   |
| Mfap4         | 0 | 0 | 0 | 79   | 1.316667 | 0.059296 | 0.091379 | Unclassified | chr11:61296945-61302206   | 3.262    |
| Fbxo47        | 0 | 0 | 0 | 281  | 4.683333 | 1.07502  | 95.92393 | Stalled      | chr11:97715620-97747468   | 29.849   |
| Mras          | 0 | 0 | 0 | 53   | 0.883333 | 0.260649 | 0.99303  | Unclassified | chr9:99285838-99339131    | 51.294   |
| 1700007G11Rik | 0 | 0 | 0 | 258  | 4.3      | 1.88962  | 2.60719  | Unclassified | chr5:98756322-99231038    | 472.717  |
| Olfr1257      | 0 | 0 | 0 | 2    | 0.033333 | 0        | 2        | Unclassified | chr2:89718984-89721914    | 0.931    |
| BC039632      | 0 | 0 | 0 | 275  | 4.583333 | 0.196595 | 0.686918 | Unclassified | chr7:135028957-135036484  | 5.528    |
| Pmfbp1        | 0 | 0 | 0 | 64   | 1.066667 | 0.02263  | 0.434394 | Unclassified | chr8:112015926-112066542  | 48.617   |
| Abhd13        | 0 | 0 | 0 | 352  | 5.866667 | 3.3078   | 15.31709 | Unclassified | chr8:9975716-9992154      | 14.439   |
| Olfr859       | 0 | 0 | 0 | 0    | 0        | 0        | 0        | Unclassified | chr9:19610763-19613693    | 0.931    |
| Olfr1252      | 0 | 0 | 0 | 0    | 0        | 0        | 0        | Unclassified | chr2:89561321-89564266    | 0.946    |
| Olfr855       | 0 | 0 | 0 | 1    | 0.016667 | 0.025892 | 1        | Unclassified | chr9:19386954-19389944    | 0.991    |
| Olfr850       | 0 | 0 | 0 | 0    | 0        | 0        | 0        | Unclassified | chr9:19281744-19284692    | 0.949    |
| Olfr854       | 0 | 0 | 0 | 1    | 0.016667 | 0.020263 | 1        | Unclassified | chr9:19370878-19373826    | 0.949    |
| Olfr536       | 0 | 0 | 0 | 8    | 0.133333 | 0.014965 | 0.476759 | Unclassified | chr7:147686751-147695217  | 6.467    |
| Mbip          | 0 | 0 | 0 | 208  | 3.466667 | 6.7046   | 17.22139 | Stalled      | chr12:57429307-57448855   | 17.549   |
| Arntl2        | 0 | 0 | 0 | 34   | 0.566667 | 0.081023 | 0        | Unclassified | chr6:146752051-146781168  | 27.118   |
| Ttc39a        | 0 | 0 | 0 | 118  | 1.966667 | 0.076646 | 0.986108 | Unclassified | chr4:109077704-109117348  | 37.645   |
| Ppp1r1b       | 0 | 0 | 0 | 36   | 0.6      | 0.411541 | 0.869856 | Unclassified | chr11:98208051-98219109   | 9.059    |
| Fnta          | 0 | 0 | 0 | 346  | 5.766667 | 14.1794  | 20.97956 | Unclassified | chr8:27109193-27128073    | 16.881   |
| Ppp1cb        | 0 | 0 | 0 | 793  | 13.21667 | 13.1998  | 25.54856 | Unclassified | chr5:32759342-32796085    | 34.744   |
| Ppp1b         | 0 | 0 | 0 | 791  | 13.18333 | 17.1712  | 19.19253 | Unclassified | chr17:85355340-85423331   | 65.992   |
| Ppm1a         | 0 | 0 | 0 | 675  | 11.25    | 14.9062  | 27.82818 | Unclassified | chr12:73860197-73895926   | 33.73    |
| Dcaf12l2      | 0 | 0 | 0 | 2    | 0.033333 | 0.008897 | 0        | Unclassified | chrX:41718633-41723514    | 2.882    |
| Fam124b       | 0 | 0 | 0 | 41   | 0.683333 | 0.411861 | 4.590007 | Unclassified | chr1:80195273-80212519    | 15.247   |

|               |   |   |   |      |          |          |           |              |                           |         |
|---------------|---|---|---|------|----------|----------|-----------|--------------|---------------------------|---------|
| Gm4987        | 0 | 0 | 0 | 0    | 0        | 48.0153  | 0         | Unclassified | chrX:43809017-43811523    | 0.507   |
| Dcaf121i      | 0 | 0 | 0 | 1    | 0.016667 | 0.04814  | 0         | Unclassified | chrX:42139748-42145328    | 3.581   |
| Fez2          | 0 | 0 | 0 | 357  | 5.95     | 3.25867  | 17.14488  | Unclassified | chr17:78777224-78819443   | 40.22   |
| Cdh5          | 0 | 0 | 0 | 165  | 2.75     | 0.218643 | 0         | Unclassified | chr8:106623524-106668402  | 42.879  |
| Tox3          | 0 | 0 | 0 | 80   | 1.333333 | 0.07225  | 2.300238  | Unclassified | chr8:92771010-92874151    | 101.142 |
| Odam          | 0 | 0 | 0 | 2    | 0.033333 | 0.073742 | 2         | Unclassified | chr5:88312719-88321767    | 7.049   |
| Hhip          | 0 | 0 | 0 | 71   | 1.833333 | 0.26534  | 1.152751  | Unclassified | chr8:82489749-82563907    | 92.159  |
| Gpx8          | 0 | 0 | 0 | 9    | 0.15     | 0.138759 | 1.585635  | Unclassified | chr13:113832970-113838596 | 3.627   |
| Afg3l2        | 0 | 0 | 0 | 750  | 12.5     | 17.2621  | 11.61099  | Unclassified | chr18:67564417-67610790   | 44.374  |
| Nxph4         | 0 | 0 | 0 | 29   | 0.483333 | 1.08652  | 0.537623  | Unclassified | chr10:126962528-126973615 | 9.088   |
| Fam151a       | 0 | 0 | 0 | 34   | 0.566667 | 0.110526 | 0.631398  | Unclassified | chr4:106404519-106420897  | 14.379  |
| Wdr7          | 0 | 0 | 0 | 821  | 13.68333 | 2.87979  | 35.43786  | Stalled      | chr18:63866348-64149411   | 281.064 |
| Neu2          | 0 | 0 | 0 | 28   | 0.466667 | 0.024319 | 0.457973  | Unclassified | chr1:89468601-89494413    | 23.813  |
| Nr0b2         | 0 | 0 | 0 | 9    | 0.15     | 0.137563 | 0.4094028 | Unclassified | chr4:133107304-133112451  | 3.148   |
| Nr2e3         | 0 | 0 | 0 | 11   | 0.183333 | 0.051291 | 0.948159  | Unclassified | chr9:59790577-59799886    | 7.31    |
| Rnase4        | 0 | 0 | 0 | 43   | 0.716667 | 1.56642  | 2.55486   | Unclassified | chr14:51708751-51725826   | 15.076  |
| Zfp810        | 0 | 0 | 0 | 332  | 5.533333 | 1.7549   | 14.26455  | Unclassified | chr9:22081191-22114082    | 30.892  |
| 5730419I09Rik | 0 | 0 | 0 | 1038 | 17.3     | 9.69165  | 17.73154  | Unclassified | chr6:142959439-143050627  | 89.189  |
| Ttc22         | 0 | 0 | 0 | 35   | 0.583333 | 0.075896 | 1.051866  | Unclassified | chr4:106293053-106312790  | 17.738  |
| Arrdc5        | 0 | 0 | 0 | 19   | 0.316667 | 0.060683 | 0.244463  | Unclassified | chr17:56433533-56441709   | 6.177   |
| 1700015E13Rik | 0 | 0 | 0 | 6    | 0.1      | 0.053926 | 2.081445  | Unclassified | chr1:172236991-172242256  | 3.266   |
| Tdpoz2        | 0 | 0 | 0 | 0    | 0        | 0.01411  | 0         | Unclassified | chr3:93455492-93458585    | 1.094   |
| Scyl1         | 0 | 0 | 0 | 432  | 7.2      | 18.9347  | 6.728695  | Unclassified | chr19:5758426-5773401     | 12.976  |
| 2310079F23Rik | 0 | 0 | 0 | 747  | 12.45    | 5.91592  | 13.46512  | Unclassified | chr5:35898857-35919719    | 18.863  |
| Pus7l         | 0 | 0 | 0 | 453  | 7.55     | 2.74494  | 40.95778  | Unclassified | chr15:94353070-94375938   | 20.869  |
| 1500015O10Rik | 0 | 0 | 0 | 66   | 1.1      | 0.043298 | 0.296469  | Unclassified | chr1:43785446-43799409    | 11.964  |
| Mall          | 0 | 0 | 0 | 69   | 1.15     | 0.117282 | 1.433124  | Unclassified | chr2:127530125-127557633  | 25.509  |
| Fam69c        | 0 | 0 | 0 | 24   | 0.4      | 0.077386 | 2.121339  | Unclassified | chr18:84887633-84909828   | 20.196  |
| Rasl10b       | 0 | 0 | 0 | 37   | 0.616667 | 0.165681 | 1.173811  | Unclassified | chr11:83221573-83234540   | 10.968  |
| Olfr1258      | 0 | 0 | 0 | 1    | 0.016667 | 0        | 1         | Unclassified | chr2:89767967-89770903    | 0.937   |
| Sifn8         | 0 | 0 | 0 | 373  | 6.216667 | 4.36864  | 7.111612  | Unclassified | chr11:82815659-82836312   | 18.654  |
| Mfsd7b        | 0 | 0 | 0 | 600  | 10       | 4.32721  | 35.63537  | Unclassified | chr1:192829710-192852069  | 20.36   |
| Dgki          | 0 | 0 | 0 | 376  | 6.266667 | 0.119857 | 0.547739  | Unclassified | chr6:36796021-37251976    | 453.956 |
| Il1rap        | 0 | 0 | 0 | 357  | 5.95     | 2.15743  | 43.77737  | Stalled      | chr16:26579790-26725233   | 143.444 |
| Ii3           | 0 | 0 | 0 | 3    | 0.05     | 0.030192 | 1.089253  | Unclassified | chr11:54078586-54082781   | 2.196   |
| Mtrr          | 0 | 0 | 0 | 680  | 11.33333 | 5.71883  | 27.40426  | Unclassified | chr13:68699656-68722998   | 21.343  |
| Klra3         | 0 | 0 | 0 | 1    | 0.016667 | 0.01196  | 0         | Unclassified | chr6:130273304-130289644  | 14.341  |
| Ii4           | 0 | 0 | 0 | 13   | 0.216667 | 0.06595  | 0         | Unclassified | chr11:53425964-53434167   | 6.204   |
| Ii3ra         | 0 | 0 | 0 | 421  | 7.016667 | 8.21732  | 8.44699   | Unclassified | chr14:15177008-15188004   | 8.997   |
| Klra2         | 0 | 0 | 0 | 10   | 0.166667 | 0.007172 | 0.750893  | Unclassified | chr6:131169252-131199380  | 28.129  |
| Gm5934        | 0 | 0 | 0 | 0    | 0        | 0.015278 | 0         | Unclassified | chrX:24051433-24079886    | 26.454  |
| Cthrc1        | 0 | 0 | 0 | 22   | 0.366667 | 0.110106 | 3.186042  | Unclassified | chr15:38906477-38918665   | 10.189  |
| Cign          | 0 | 0 | 0 | 45   | 0.75     | 0.736711 | 2.430349  | Unclassified | chr8:85911789-85950728    | 36.94   |
| Cldn5         | 0 | 0 | 0 | 15   | 0.25     | 0.416938 | 0.223871  | Unclassified | chr16:18774939-18778353   | 1.415   |
| Cldn4         | 0 | 0 | 0 | 18   | 0.3      | 0.509061 | 1.398589  | Unclassified | chr5:135420992-135424804  | 1.813   |
| Cxcl9         | 0 | 0 | 0 | 7    | 0.116667 | 0.105884 | 1.069767  | Unclassified | chr5:92750356-92759105    | 6.75    |
| Akr1c20       | 0 | 0 | 0 | 11   | 0.183333 | 0        | 0         | Unclassified | chr13:4506404-4524579     | 16.176  |
| Sbsn          | 0 | 0 | 0 | 16   | 0.266667 | 0.458989 | 1.885126  | Unclassified | chr7:31534489-31541153    | 4.665   |
| Apip          | 0 | 0 | 0 | 355  | 5.916667 | 15.3789  | 24.7209   | Unclassified | chr2:102911831-102932806  | 18.976  |
| Scoc          | 0 | 0 | 0 | 227  | 3.783333 | 1.29865  | 31.54591  | Stalled      | chr8:85958391-85968547    | 8.157   |
| Dqx1          | 0 | 0 | 0 | 376  | 6.266667 | 0.975798 | 4.305587  | Unclassified | chr6:83005837-83017213    | 9.377   |
| Zmym3         | 0 | 0 | 0 | 247  | 4.116667 | 3.6712   | 0.84444   | Unclassified | chrX:98599723-98618188    | 16.466  |
| Defb19        | 0 | 0 | 0 | 10   | 0.166667 | 0.130446 | 1.176735  | Unclassified | chr2:152401822-152408048  | 4.227   |
| Sult1b1       | 0 | 0 | 0 | 6    | 0.1      | 0.014765 | 0         | Unclassified | chr5:87942363-87969220    | 24.858  |
| Pus1          | 0 | 0 | 0 | 495  | 8.25     | 35.899   | 5.530515  | Unclassified | chr5:111202685-111211615  | 6.931   |
| Acot9         | 0 | 0 | 0 | 259  | 4.316667 | 6.5246   | 36.19297  | Stalled      | chrX:151695042-151732050  | 35.009  |
| Cnot6         | 0 | 0 | 0 | 678  | 11.3     | 17.3788  | 17.42667  | Unclassified | chr11:49488211-49528212   | 38.002  |
| Brwd1         | 0 | 0 | 0 | 428  | 7.133333 | 1.8019   | 15.08741  | Stalled      | chr16:96213698-96306035   | 90.338  |
| Pcdhb1        | 0 | 0 | 0 | 7    | 0.116667 | 0.307759 | 0.843262  | Unclassified | chr18:37422651-37427108   | 2.458   |
| Pcdhb2        | 0 | 0 | 0 | 7    | 0.116667 | 0.037898 | 1.487437  | Unclassified | chr18:37452493-37457268   | 2.776   |
| Pcdhb3        | 0 | 0 | 0 | 2    | 0.033333 | 0.010153 | 0         | Unclassified | chr18:37458452-37464239   | 3.788   |
| Pcdhb4        | 0 | 0 | 0 | 5    | 0.083333 | 0.027569 | 0         | Unclassified | chr18:37465108-37470827   | 3.72    |
| Pcdhb5        | 0 | 0 | 0 | 1    | 0.016667 | 0.022503 | 0         | Unclassified | chr18:37478034-37483567   | 3.534   |
| Vit           | 0 | 0 | 0 | 132  | 2.2      | 0.073041 | 0.480224  | Unclassified | chr17:78905479-79026738   | 119.26  |
| Pcdhb7        | 0 | 0 | 0 | 7    | 0.116667 | 0.025563 | 1.155832  | Unclassified | chr18:37499355-37504861   | 3.507   |
| Pcdhb8        | 0 | 0 | 0 | 1    | 0.016667 | 0.043791 | 0         | Unclassified | chr18:37512924-37517264   | 2.341   |
| Htr3b         | 0 | 0 | 0 | 26   | 0.433333 | 0.026579 | 1.115112  | Unclassified | chr9:48743112-48775095    | 29.984  |
| Leprot1       | 0 | 0 | 0 | 128  | 2.133333 | 2.61202  | 11.77706  | Stalled      | chr8:35198625-35211793    | 11.169  |
| Lst1          | 0 | 0 | 0 | 116  | 1.933333 | 6.37479  | 0.467373  | Unclassified | chr17:35322039-35327385   | 3.347   |
| Tex264        | 0 | 0 | 0 | 443  | 7.383333 | 12.5193  | 4.11651   | Unclassified | chr9:106561076-106590279  | 27.204  |
| Jak1          | 0 | 0 | 0 | 1827 | 30.45    | 22.1315  | 20.67555  | Unclassified | chr4:100824578-100939887  | 113.31  |
| Lrrn3         | 0 | 0 | 0 | 202  | 3.366667 | 1.11866  | 4.72438   | Unclassified | chr12:42178254-42214338   | 34.085  |
| Rnf111        | 0 | 0 | 0 | 1080 | 18       | 5.76264  | 32.55991  | Unclassified | chr9:70273235-70353532    | 78.298  |
| F11r          | 0 | 0 | 0 | 66   | 1.1      | 1.14061  | 3.578154  | Unclassified | chr1:173365691-173394724  | 27.034  |
| Olfr366       | 0 | 0 | 0 | 2    | 0.033333 | 0        | 1         | Unclassified | chr2:37073010-37075940    | 0.931   |
| Cacng1        | 0 | 0 | 0 | 22   | 0.366667 | 0.095883 | 1.620621  | Unclassified | chr11:107564531-107579790 | 13.26   |
| Cacnb4        | 0 | 0 | 0 | 339  | 5.65     | 0.260318 | 4.305745  | Unclassified | chr2:52283839-52534101    | 248.263 |
| Mycbp2        | 0 | 0 | 0 | 1734 | 28.9     | 6.55528  | 27.86967  | Unclassified | chr14:103512627-103748017 | 233.391 |
| Mapkap1       | 0 | 0 | 0 | 902  | 15.03333 | 7.07406  | 1.417839  | Unclassified | chr2:34285544-34480470    | 192.927 |
| Cacna2d1      | 0 | 0 | 0 | 205  | 3.416667 | 0.034639 | 2.060771  | Unclassified | chr5:15438508-15880329    | 439.822 |
| Cacna1e       | 0 | 0 | 0 | 1301 | 21.68333 | 4.037    | 1.644132  | Unclassified | chr1:156239648-156575050  | 333.403 |
| Cacnb3        | 0 | 0 | 0 | 168  | 2.8      | 0.648126 | 0.418158  | Unclassified | chr15:98460650-98474961   | 12.312  |
| Tapt1         | 0 | 0 | 0 | 795  | 13.25    | 4.96168  | 16.38421  | Unclassified | chr5:44566400-44619845    | 51.446  |
| Sgta          | 0 | 0 | 0 | 394  | 6.566667 | 30.1903  | 6.79901   | Unclassified | chr10:80506817-80524899   | 16.083  |
| Nup37         | 0 | 0 | 0 | 518  | 8.633333 | 9.60409  | 42.21233  | Unclassified | chr10:87607736-87641133   | 31.398  |
| Pigg          | 0 | 0 | 0 | 169  | 2.816667 | 14.5284  | 39.28708  | Stalled      | chr16:94580370-94594317   | 11.948  |

|                      |   |   |   |      |           |          |          |              |                           |         |
|----------------------|---|---|---|------|-----------|----------|----------|--------------|---------------------------|---------|
| <b>Parp8</b>         | 0 | 0 | 0 | 957  | 15.95     | 3.8882   | 18.18752 | Stalled      | chr13:117643630-117816323 | 170.694 |
| <b>Cml5</b>          | 0 | 0 | 0 | 7    | 0.116667  | 0.031343 | 0.478805 | Unclassified | chr6:85767211-85772966    | 3.756   |
| <b>Srp14</b>         | 0 | 0 | 0 | 341  | 5.683333  | 43.7862  | 8.653161 | Unclassified | chr2:118301578-118307432  | 3.855   |
| <b>Srpk1</b>         | 0 | 0 | 0 | 1136 | 18.933333 | 16.0483  | 11.77696 | Unclassified | chr17:28726536-28761399   | 32.864  |
| <b>Gm8333</b>        | 0 | 0 | 0 | 8    | 0.133333  | 0        | 0.746867 | Unclassified | chr4:152069648-152075031  | 3.384   |
| <b>Srpk2</b>         | 0 | 0 | 0 | 534  | 8.9       | 3.31328  | 6.697112 | Unclassified | chr5:23009173-23124389    | 113.217 |
| <b>Fabp4</b>         | 0 | 0 | 0 | 19   | 0.316667  | 0.359897 | 0.750798 | Unclassified | chr3:10204342-10210576    | 4.235   |
| <b>Tnni3k</b>        | 0 | 0 | 0 | 151  | 2.516667  | 0.012639 | 0.64125  | Unclassified | chr3:154449254-154720371  | 269.118 |
| <b>Cntn2</b>         | 0 | 0 | 0 | 122  | 2.033333  | 0.102154 | 0.426405 | Unclassified | chr1:134406001-134441517  | 33.517  |
| <b>Mrpl27</b>        | 0 | 0 | 0 | 314  | 5.233333  | 16.3187  | 6.824778 | Unclassified | chr11:94513104-94521401   | 6.298   |
| <b>Mrpl16</b>        | 0 | 0 | 0 | 150  | 2.5       | 19.5986  | 16.70517 | Stalled      | chr19:11842904-11849436   | 4.533   |
| <b>Lce3c</b>         | 0 | 0 | 0 | 1    | 0.016667  | 0        | 1        | Unclassified | chr3:92746407-92749652    | 1.246   |
| <b>Lrfn2</b>         | 0 | 0 | 0 | 179  | 2.983333  | 0.021353 | 0.976221 | Unclassified | chr17:49069906-49236915   | 165.01  |
| <b>Heatr5b</b>       | 0 | 0 | 0 | 515  | 8.583333  | 4.49364  | 78.07108 | Stalled      | chr17:79152245-79236721   | 82.477  |
| <b>Qpct</b>          | 0 | 0 | 0 | 58   | 0.966667  | 1.0325   | 3.672433 | Unclassified | chr17:79449245-79489583   | 38.339  |
| <b>Ccdc150</b>       | 0 | 0 | 0 | 126  | 2.1       | 0.454293 | 19.7943  | Stalled      | chr1:54305526-54425571    | 118.046 |
| <b>BC051070</b>      | 0 | 0 | 0 | 13   | 0.216667  | 0.015367 | 0        | Unclassified | chr3:106190301-106211100  | 18.8    |
| <b>Fgf3</b>          | 0 | 0 | 0 | 6    | 0.1       | 0.05367  | 0        | Unclassified | chr7:152022516-152029253  | 4.738   |
| <b>Fgf4</b>          | 0 | 0 | 0 | 5    | 0.083333  | 0.088826 | 1.176785 | Unclassified | chr7:152045290-152051148  | 3.859   |
| <b>Fgf5</b>          | 0 | 0 | 0 | 18   | 0.3       | 0.081992 | 0.562397 | Unclassified | chr5:98681202-98706049    | 22.848  |
| <b>Fgf6</b>          | 0 | 0 | 0 | 9    | 0.15      | 0.104029 | 0.505501 | Unclassified | chr6:126963559-126974736  | 9.178   |
| <b>Fgf15</b>         | 0 | 0 | 0 | 13   | 0.216667  | 0.453926 | 2.131132 | Unclassified | chr7:152080436-152086856  | 4.421   |
| <b>Fgf17</b>         | 0 | 0 | 0 | 24   | 0.4       | 0.501409 | 0.878387 | Unclassified | chr14:71036011-71044075   | 6.065   |
| <b>Fuca1</b>         | 0 | 0 | 0 | 371  | 6.183333  | 22.3937  | 12.15619 | Unclassified | chr4:135474640-135496215  | 19.576  |
| <b>Dus4l</b>         | 0 | 0 | 0 | 387  | 6.45      | 3.84345  | 34.25598 | Unclassified | chr12:32324919-32341691   | 14.773  |
| <b>0610007L01Rik</b> | 0 | 0 | 0 | 1175 | 19.583333 | 17.1455  | 0.174855 | Unclassified | chr5:130693613-130719635  | 24.023  |
| <b>Syt17</b>         | 0 | 0 | 0 | 92   | 1.533333  | 0.11889  | 2.516883 | Unclassified | chr7:125525369-125589066  | 61.698  |
| <b>Tmem79</b>        | 0 | 0 | 0 | 148  | 2.466667  | 0.85519  | 3.150669 | Unclassified | chr3:88132574-88140355    | 5.782   |
| <b>Slc7a3</b>        | 0 | 0 | 0 | 43   | 0.716667  | 4.11525  | 5.392751 | Unclassified | chrX:98274559-98282691    | 6.133   |
| <b>Atp10a</b>        | 0 | 0 | 0 | 738  | 12.3      | 3.21476  | 22.50459 | Stalled      | chr7:65911571-66084796    | 171.222 |
| <b>Atp8a1</b>        | 0 | 0 | 0 | 1084 | 18.06667  | 1.59798  | 30.67323 | Stalled      | chr5:68009379-68240670    | 229.296 |
| <b>Atp9a</b>         | 0 | 0 | 0 | 193  | 3.216667  | 0.522967 | 3.013529 | Unclassified | chr2:168459937-168569300  | 107.364 |
| <b>6330406I15Rik</b> | 0 | 0 | 0 | 50   | 0.833333  | 0.075757 | 0.27834  | Unclassified | chr5:150212380-150234278  | 19.899  |
| <b>Gni3l</b>         | 0 | 0 | 0 | 401  | 6.683333  | 3.34714  | 15.03512 | Unclassified | chrX:147417675-147453865  | 34.191  |
| <b>Tmem66</b>        | 0 | 0 | 0 | 127  | 2.116667  | 11.6062  | 12.42341 | Stalled      | chr8:35215616-35233901    | 16.286  |
| <b>Lrrc16b</b>       | 0 | 0 | 0 | 89   | 1.483333  | 1.74062  | 5.377517 | Unclassified | chr14:56107929-56127101   | 17.173  |
| <b>Olfr424</b>       | 0 | 0 | 0 | 3    | 0.05      | 0.06774  | 1        | Unclassified | chr1:176064876-176067822  | 0.947   |
| <b>Olfr509</b>       | 0 | 0 | 0 | 2    | 0.033333  | 0        | 1        | Unclassified | chr7:115789122-115792088  | 0.967   |
| <b>Commd9</b>        | 0 | 0 | 0 | 190  | 3.166667  | 9.30201  | 11.4099  | Stalled      | chr2:101724418-101741796  | 15.379  |
| <b>Olfr513</b>       | 0 | 0 | 0 | 0    | 0         | 0        | 0        | Unclassified | chr7:115896371-115899301  | 0.931   |
| <b>Palmd</b>         | 0 | 0 | 0 | 31   | 0.516667  | 0.042828 | 0.631475 | Unclassified | chr3:116621179-116673870  | 50.692  |
| <b>Dazl</b>          | 0 | 0 | 0 | 53   | 0.883333  | 0        | 5.604895 | Unclassified | chr17:50418718-50434924   | 14.207  |
| <b>Asb14</b>         | 0 | 0 | 0 | 71   | 1.183333  | 0.057244 | 0        | Unclassified | chr14:27705789-27727602   | 19.814  |
| <b>Abcb4</b>         | 0 | 0 | 0 | 163  | 2.716667  | 1.3557   | 9.896585 | Unclassified | chr5:8891720-8959226      | 65.507  |
| <b>Phex</b>          | 0 | 0 | 0 | 136  | 2.266667  | 0.037243 | 1.318889 | Unclassified | chrX:153596617-153855218  | 256.602 |
| <b>Slc25a3</b>       | 0 | 0 | 0 | 639  | 10.65     | 186.412  | 13.84403 | Unclassified | chr10:90579322-90588708   | 7.387   |
| <b>Fxr1</b>          | 0 | 0 | 0 | 628  | 10.46667  | 18.7613  | 17.87789 | Unclassified | chr3:33917000-33968266    | 49.267  |
| <b>Prss41</b>        | 0 | 0 | 0 | 18   | 0.3       | 0.553223 | 0.657926 | Unclassified | chr17:23973751-23983123   | 7.373   |
| <b>Asb13</b>         | 0 | 0 | 0 | 319  | 5.316667  | 4.08944  | 17.47286 | Unclassified | chr13:3631321-3651025     | 17.705  |
| <b>D7Erdt443e</b>    | 0 | 0 | 0 | 76   | 1.266667  | 0.042281 | 0.593646 | Unclassified | chr7:141457944-141570511  | 110.568 |
| <b>Olfr457</b>       | 0 | 0 | 0 | 2    | 0.033333  | 0.008395 | 1        | Unclassified | chr6:42421233-42424175    | 0.943   |
| <b>Abp1</b>          | 0 | 0 | 0 | 24   | 0.4       | 0.023974 | 1.215069 | Unclassified | chr6:48843253-48859186    | 13.934  |
| <b>Myo5b</b>         | 0 | 0 | 0 | 342  | 5.7       | 0.046275 | 1.972505 | Unclassified | chr18:74600272-74931131   | 328.86  |
| <b>Myo5a</b>         | 0 | 0 | 0 | 1494 | 24.9      | 5.03014  | 39.11614 | Unclassified | chr9:74917012-75071494    | 152.483 |
| <b>Myo1f</b>         | 0 | 0 | 0 | 147  | 2.45      | 3.3199   | 8.091808 | Unclassified | chr17:33690651-33744709   | 52.059  |
| <b>Slc22a9</b>       | 0 | 0 | 0 | 19   | 0.316667  | 0.038818 | 0.674114 | Unclassified | chr19:7747567-7787800     | 38.234  |
| <b>Creb3l3</b>       | 0 | 0 | 0 | 75   | 1.25      | 0.089665 | 0.316597 | Unclassified | chr10:80547077-80563617   | 14.541  |
| <b>Myo1b</b>         | 0 | 0 | 0 | 152  | 2.533333  | 0.126848 | 1.582394 | Unclassified | chr1:51806615-51974818    | 166.204 |
| <b>Myo15</b>         | 0 | 0 | 0 | 333  | 5.55      | 0.105467 | 11.7242  | Stalled      | chr11:60280840-60341870   | 59.031  |
| <b>Smurf1</b>        | 0 | 0 | 0 | 570  | 9.5       | 2.36189  | 12.30067 | Unclassified | chr5:145637363-145728699  | 89.337  |
| <b>Abcg5</b>         | 0 | 0 | 0 | 33   | 0.55      | 0.045307 | 1.430299 | Unclassified | chr17:85057573-85084263   | 24.691  |
| <b>Olfr1076</b>      | 0 | 0 | 0 | 0    | 0         | 0        | 0        | Unclassified | chr2:86346617-86349559    | 0.943   |
| <b>38967</b>         | 0 | 0 | 0 | 67   | 1.116667  | 0.238744 | 2.475285 | Unclassified | chr11:53331301-53357598   | 24.298  |
| <b>Hsd17b6</b>       | 0 | 0 | 0 | 21   | 0.35      | 0.008784 | 0.450454 | Unclassified | chr10:127427991-127446564 | 16.574  |
| <b>Skp2</b>          | 0 | 0 | 0 | 338  | 5.633333  | 3.43573  | 15.24121 | Unclassified | chr15:9041741-9072207     | 28.467  |
| <b>Abca8b</b>        | 0 | 0 | 0 | 46   | 0.766667  | 0.097444 | 1.17634  | Unclassified | chr11:109794719-109859130 | 62.412  |
| <b>Serfl</b>         | 0 | 0 | 0 | 59   | 0.983333  | 5.6357   | 16.45426 | Stalled      | chr13:100875973-100884188 | 6.216   |
| <b>Lair1</b>         | 0 | 0 | 0 | 34   | 0.566667  | 0.153055 | 3.315952 | Unclassified | chr7:3958674-4016806      | 56.133  |
| <b>Gm5431</b>        | 0 | 0 | 0 | 29   | 0.483333  | 0.910747 | 4.623223 | Unclassified | chr11:48700923-48717654   | 14.732  |
| <b>Styk1</b>         | 0 | 0 | 0 | 13   | 0.216667  | 0.064499 | 1.733376 | Unclassified | chr6:131249161-131265845  | 14.685  |
| <b>Pi4k2b</b>        | 0 | 0 | 0 | 164  | 2.733333  | 3.57379  | 18.4412  | Stalled      | chr5:53130812-53160579    | 27.768  |
| <b>Cdc37l1</b>       | 0 | 0 | 0 | 510  | 8.5       | 6.7298   | 28.15449 | Unclassified | chr19:29062983-29092059   | 27.077  |
| <b>Rps6ka6</b>       | 0 | 0 | 0 | 21   | 0.35      | 0.10398  | 0.881485 | Unclassified | chrX:108501800-108653554  | 149.755 |
| <b>Magt1</b>         | 0 | 0 | 0 | 399  | 6.65      | 21.3818  | 29.15852 | Stalled      | chrX:103165816-103209125  | 41.31   |
| <b>Mon2</b>          | 0 | 0 | 0 | 628  | 10.46667  | 4.74473  | 22.69832 | Unclassified | chr10:122429116-122515561 | 84.446  |
| <b>Srrm4</b>         | 0 | 0 | 0 | 155  | 2.583333  | 0.09773  | 0.495984 | Unclassified | chr5:116889281-117043826  | 152.546 |
| <b>Cecr2</b>         | 0 | 0 | 0 | 441  | 7.35      | 1.1911   | 24.19169 | Stalled      | chr6:120614438-120721209  | 104.772 |
| <b>Cutc</b>          | 0 | 0 | 0 | 468  | 7.8       | 5.4829   | 112.8642 | Stalled      | chr19:43825512-43843128   | 15.617  |
| <b>4932412H11Rik</b> | 0 | 0 | 0 | 54   | 0.9       | 0.041254 | 7.012876 | Unclassified | chr5:3843172-3866596      | 21.425  |
| <b>6430526N21Rik</b> | 0 | 0 | 0 | 743  | 12.383333 | 10.0241  | 6.829184 | Unclassified | chr7:4969977-4984825      | 12.849  |
| <b>Fam57b</b>        | 0 | 0 | 0 | 34   | 0.566667  | 0.19958  | 0        | Unclassified | chr7:133958398-133973731  | 13.334  |
| <b>Fam110b</b>       | 0 | 0 | 0 | 112  | 1.866667  | 0.314608 | 1.773719 | Unclassified | chr4:5569325-5727091      | 155.767 |
| <b>Krtap3-3</b>      | 0 | 0 | 0 | 1    | 0.016667  | 0        | 0        | Unclassified | chr11:99411445-99414177   | 0.733   |
| <b>Klh9</b>          | 0 | 0 | 0 | 191  | 3.183333  | 7.97031  | 20.03434 | Stalled      | chr4:88364195-88370412    | 4.218   |
| <b>Csf3r</b>         | 0 | 0 | 0 | 44   | 0.733333  | 0.582746 | 2.793894 | Unclassified | chr4:12569902-125721684   | 19.783  |
| <b>Csf3</b>          | 0 | 0 | 0 | 38   | 0.633333  | 0.075224 | 0.089911 | Unclassified | chr11:98560626-98564943   | 2.318   |

|               |   |   |   |      |          |          |          |              |                           |          |
|---------------|---|---|---|------|----------|----------|----------|--------------|---------------------------|----------|
| Csf2rb2       | 0 | 0 | 0 | 122  | 2.033333 | 1.39479  | 0.966994 | Unclassified | chr15:78112939-78138033   | 23.095   |
| Csf2rb        | 0 | 0 | 0 | 300  | 5        | 5.03781  | 2.926179 | Elongating   | chr15:78154419-78181431   | 25.013   |
| Csf2          | 0 | 0 | 0 | 11   | 0.183333 | 0.062035 | 0.338698 | Unclassified | chr11:54060771-54065401   | 2.631    |
| 4922505E12Rik | 0 | 0 | 0 | 5    | 0.083333 | 0        | 0.260355 | Unclassified | chr1:184677256-184681311  | 2.056    |
| Ppcs          | 0 | 0 | 0 | 208  | 3.466667 | 11.5516  | 28.10029 | Stalled      | chr4:119091137-119097025  | 3.889    |
| Dlk2          | 0 | 0 | 0 | 38   | 0.633333 | 0.58537  | 0.913977 | Unclassified | chr17:46432369-46440220   | 5.852    |
| Wfdc9         | 0 | 0 | 0 | 8    | 0.133333 | 0        | 0        | Unclassified | chr2:164475124-164482466  | 5.343    |
| 2410127L17Rik | 0 | 0 | 0 | 340  | 5.666667 | 3.9983   | 11.04688 | Unclassified | chr19:18743269-18779282   | 34.014   |
| Ccr11         | 0 | 0 | 0 | 8    | 0.133333 | 0.070226 | 0.631075 | Unclassified | chr9:123891781-123895241  | 1.461    |
| Bag4          | 0 | 0 | 0 | 500  | 8.333333 | 2.70617  | 53.03755 | Stalled      | chr8:26875010-26897681    | 20.672   |
| Fam132a       | 0 | 0 | 0 | 131  | 2.183333 | 2.16286  | 3.36011  | Unclassified | chr4:155334426-155340738  | 4.313    |
| A530088H08Rik | 0 | 0 | 0 | 13   | 0.216667 | 0.068036 | 0        | Unclassified | chr11:66723492-66742202   | 16.711   |
| Maf           | 0 | 0 | 0 | 17   | 0.283333 | 0.770669 | 3.746943 | Unclassified | chr8:118227152-118232794  | 3.643    |
| Gm5592        | 0 | 0 | 0 | 3    | 0.05     | 0.015274 | 0        | Unclassified | chr7:48537696-48545553    | 5.858    |
| Olfr1079      | 0 | 0 | 0 | 1    | 0.016667 | 0.054077 | 1        | Unclassified | chr2:86378122-86381070    | 0.949    |
| Ptchd2        | 0 | 0 | 0 | 87   | 1.45     | 0.03835  | 2.328712 | Unclassified | chr4:147610965-147664074  | 51.11    |
| Odf31         | 0 | 0 | 0 | 5    | 0.083333 | 0.035601 | 0        | Unclassified | chr9:56696465-56701770    | 3.306    |
| A530099J19Rik | 0 | 0 | 0 | 5    | 0.083333 | 0.013866 | 1.203822 | Unclassified | chr13:19819285-19826820   | 5.536    |
| 2810408P10Rik | 0 | 0 | 0 | 159  | 2.65     | 1.60882  | 18.28242 | Stalled      | chr4:147197094-147224484  | 25.391   |
| Hoxa6         | 0 | 0 | 0 | 6    | 0.1      | 0.196269 | 0.386691 | Unclassified | chr6:52156363-52160623    | 2.261    |
| Hoxa5         | 0 | 0 | 0 | 6    | 0.1      | 0        | 0.759049 | Unclassified | chr6:52151752-52156586    | 2.835    |
| Hoxa4         | 0 | 0 | 0 | 75   | 1.25     | 0.360669 | 12.17218 | Stalled      | chr6:52139685-52143702    | 2.018    |
| Psg29         | 0 | 0 | 0 | 10   | 0.166667 | 0.02404  | 0        | Unclassified | chr7:17786825-17801105    | 12.281   |
| Hoxb1         | 0 | 0 | 0 | 15   | 0.25     | 0.172777 | 0.35236  | Unclassified | chr11:96225071-96229567   | 2.497    |
| Hoxa9         | 0 | 0 | 0 | 8    | 0.133333 | 0.185996 | 0.316753 | Unclassified | chr6:52174052-52179369    | 3.318    |
| Hoxa7         | 0 | 0 | 0 | 8    | 0.133333 | 0.664648 | 1.576247 | Unclassified | chr6:52165622-52170572    | 2.951    |
| Bclp2         | 0 | 0 | 0 | 24   | 0.4      | 0.049446 | 0        | Unclassified | chr3:105820049-105837732  | 15.684   |
| Hoxb13        | 0 | 0 | 0 | 10   | 0.166667 | 0.136655 | 1.530864 | Unclassified | chr11:96053674-96057913   | 2.24     |
| Ddhd1         | 0 | 0 | 0 | 682  | 11.36667 | 3.42987  | 51.54056 | Unclassified | chr14:46212848-46279818   | 64.971   |
| Cops5         | 0 | 0 | 0 | 365  | 6.083333 | 33.7109  | 17.76445 | Unclassified | chr1:10014911-10029979    | 13.069   |
| Dpysl4        | 0 | 0 | 0 | 20   | 0.333333 | 0.048565 | 0        | Unclassified | chr7:146269899-146287690  | 15.792   |
| Dcpp2         | 0 | 0 | 0 | 2    | 0.033333 | 0        | 1        | Unclassified | chr17:24033688-24037754   | 2.067    |
| Hpse2         | 0 | 0 | 0 | 382  | 6.366667 | 0.048114 | 0.611113 | Unclassified | chr19:42863084-43464801   | 599.718  |
| Tex12         | 0 | 0 | 0 | 1    | 0.016667 | 0        | 1        | Unclassified | chr9:50365252-50371373    | 4.122    |
| Acer1         | 0 | 0 | 0 | 46   | 0.766667 | 0.079146 | 0.771602 | Unclassified | chr17:57092912-57123549   | 28.638   |
| Nepr          | 0 | 0 | 0 | 8    | 0.133333 | 0.035152 | 0        | Unclassified | chr10:52109413-52124410   | 12.998   |
| Picalm        | 0 | 0 | 0 | 1507 | 25.11667 | 13.5252  | 24.2042  | Unclassified | chr7:97276741-97357442    | 78.702   |
| Sic18a1       | 0 | 0 | 0 | 290  | 4.833333 | 2.79041  | 109.8219 | Stalled      | chr8:71561606-71615121    | 51.516   |
| Scn2a1        | 0 | 0 | 0 | 50   | 0.833333 | 0.040758 | 0        | Unclassified | chr2:65506501-65605504    | 97.004   |
| Mcoln3        | 0 | 0 | 0 | 134  | 2.233333 | 0.778354 | 3.077353 | Unclassified | chr3:145782754-145803610  | 18.857   |
| Zfp53         | 0 | 0 | 0 | 475  | 7.916667 | 5.78204  | 32.09858 | Unclassified | chr17:21623951-21647441   | 21.491   |
| Cntn4         | 0 | 0 | 0 | 464  | 7.733333 | 0.044502 | 0        | Unclassified | chr6:105625738-106649299  | 1021.562 |
| Pan3          | 0 | 0 | 0 | 2424 | 40.4     | 4.74904  | 20.52836 | Unclassified | chr5:148240155-148360077  | 117.923  |
| Psmc2         | 0 | 0 | 0 | 704  | 11.73333 | 47.3318  | 9.638055 | Unclassified | chr5:21289100-21309602    | 18.503   |
| Psmc1         | 0 | 0 | 0 | 393  | 6.55     | 110.129  | 3.987484 | Unclassified | chr14:56195330-56200364   | 3.035    |
| Zufsp         | 0 | 0 | 0 | 433  | 7.216667 | 3.70165  | 14.72757 | Unclassified | chr10:33646741-33673018   | 24.278   |
| Rhox4g        | 0 | 0 | 0 | 0    | 0        | 0        | 0        | Unclassified | chrX:35061007-35067834    | 4.828    |
| Rhox4a        | 0 | 0 | 0 | 0    | 0        | 0.006768 | 0        | Unclassified | chrX:34803421-34810070    | 4.65     |
| Spert         | 0 | 0 | 0 | 10   | 0.166667 | 0.063486 | 0.504736 | Unclassified | chr14:75982640-75993792   | 9.153    |
| Mpp5          | 0 | 0 | 0 | 403  | 6.716667 | 1.86651  | 40.45339 | Stalled      | chr12:79848007-79939068   | 89.062   |
| Fam32a        | 0 | 0 | 0 | 189  | 3.15     | 28.1813  | 3.216481 | Unclassified | chr8:74741628-74747674    | 4.047    |
| Olfr464       | 0 | 0 | 0 | 0    | 0        | 0        | 0        | Unclassified | chr11:87727464-87730406   | 0.943    |
| Ccdc70        | 0 | 0 | 0 | 5    | 0.083333 | 0.036479 | 0        | Unclassified | chr8:23079067-23084513    | 3.447    |
| Abca14        | 0 | 0 | 0 | 57   | 0.95     | 0.021424 | 0        | Unclassified | chr7:127345477-127468866  | 121.39   |
| Itga8         | 0 | 0 | 0 | 146  | 2.433333 | 0.139645 | 3.487001 | Unclassified | chr2:12028286-12225547    | 195.262  |
| Rtp2          | 0 | 0 | 0 | 5    | 0.083333 | 0.03695  | 1.172185 | Unclassified | chr16:23925633-23932880   | 5.248    |
| Zfp831        | 0 | 0 | 0 | 238  | 3.966667 | 0.977582 | 0.438627 | Unclassified | chr2:174467034-174536331  | 67.298   |
| Oas1d         | 0 | 0 | 0 | 11   | 0.183333 | 0.050433 | 0        | Unclassified | chr5:121362826-121371654  | 6.829    |
| Ablim3        | 0 | 0 | 0 | 122  | 2.033333 | 0.265828 | 3.491087 | Unclassified | chr18:61959048-62073478   | 112.431  |
| Fam149a       | 0 | 0 | 0 | 45   | 0.75     | 0.14035  | 0.514888 | Unclassified | chr8:46422068-46469645    | 45.578   |
| Eif2s2        | 0 | 0 | 0 | 662  | 11.03333 | 22.4154  | 6.167928 | Unclassified | chr2:154697145-154720642  | 21.498   |
| Prr15l        | 0 | 0 | 0 | 40   | 0.666667 | 0.14582  | 0.396156 | Unclassified | chr11:96788637-96796961   | 6.325    |
| Nipal4        | 0 | 0 | 0 | 56   | 0.933333 | 0.221709 | 1.261326 | Unclassified | chr11:45961656-45981861   | 18.206   |
| Scyl2         | 0 | 0 | 0 | 304  | 5.066667 | 4.95279  | 17.47635 | Stalled      | chr10:89102851-89151030   | 46.18    |
| Wt1           | 0 | 0 | 0 | 50   | 0.833333 | 0.095335 | 1.000945 | Unclassified | chr2:104964685-105013771  | 47.087   |
| Gm597         | 0 | 0 | 0 | 7    | 0.116667 | 0.057811 | 0.439148 | Unclassified | chr1:28832966-28839097    | 4.132    |
| Acsf5         | 0 | 0 | 0 | 1305 | 21.75    | 39.7658  | 6.689182 | Unclassified | chr19:55325858-55371118   | 43.261   |
| Xk            | 0 | 0 | 0 | 227  | 3.783333 | 1.73437  | 29.98311 | Stalled      | chrX:8847909-8890371      | 40.463   |
| Cd300a        | 0 | 0 | 0 | 33   | 0.55     | 0.160052 | 4.454719 | Unclassified | chr11:114749354-114765965 | 14.612   |
| Ttc3          | 0 | 0 | 0 | 362  | 6.033333 | 1.3737   | 39.98752 | Stalled      | chr16:94590345-94690828   | 98.484   |
| Nfatc4        | 0 | 0 | 0 | 20   | 0.333333 | 0.128086 | 0.704104 | Unclassified | chr14:56441631-56452780   | 9.15     |
| Tsta3         | 0 | 0 | 0 | 121  | 2.016667 | 15.0623  | 4.339607 | Unclassified | chr15:75755112-75762160   | 5.049    |
| Tsx           | 0 | 0 | 0 | 2    | 0.033333 | 0        | 0.901137 | Unclassified | chrX:100607805-100619919  | 10.115   |
| Trim75        | 0 | 0 | 0 | 8    | 0.133333 | 0.09213  | 0.49975  | Unclassified | chr8:67505549-67513543    | 5.995    |
| Olfr988       | 0 | 0 | 0 | 2    | 0.033333 | 0.04131  | 1        | Unclassified | chr2:85193151-85196081    | 0.931    |
| Olfr1182      | 0 | 0 | 0 | 0    | 0        | 0        | 0        | Unclassified | chr2:88286175-88289093    | 0.919    |
| Atg4c         | 0 | 0 | 0 | 216  | 3.6      | 4.55398  | 32.73022 | Stalled      | chr4:98858837-98926474    | 65.638   |
| Olfr504       | 0 | 0 | 0 | 0    | 0        | 0        | 0        | Unclassified | chr7:115708350-115711307  | 0.958    |
| Olfr685       | 0 | 0 | 0 | 2    | 0.033333 | 0.04043  | 1        | Unclassified | chr7:112328874-112331825  | 0.952    |
| Agk           | 0 | 0 | 0 | 614  | 10.23333 | 2.71812  | 35.03482 | Unclassified | chr6:40273493-40346761    | 71.269   |
| Vrk2          | 0 | 0 | 0 | 782  | 13.03333 | 5.68003  | 38.50934 | Stalled      | chr11:26371401-26495920   | 122.52   |
| Olfr566       | 0 | 0 | 0 | 1    | 0.016667 | 0.04043  | 0        | Unclassified | chr7:110004834-110007785  | 0.952    |
| Cd300ld       | 0 | 0 | 0 | 9    | 0.15     | 0.148284 | 1.688926 | Unclassified | chr11:114843760-114853200 | 7.441    |
| Cd300lb       | 0 | 0 | 0 | 16   | 0.266667 | 0.075652 | 0.862112 | Unclassified | chr11:114784094-114797700 | 11.607   |
| Eif2ak1       | 0 | 0 | 0 | 607  | 10.11667 | 14.1728  | 37.62214 | Stalled      | chr5:144576660-144663586  | 84.927   |
| Speer4d       | 0 | 0 | 0 | 6    | 0.1      | 0        | 0.556672 | Unclassified | chr5:15122916-15129682    | 4.767    |



|               |   |   |   |      |          |          |          |              |                           |         |
|---------------|---|---|---|------|----------|----------|----------|--------------|---------------------------|---------|
| Fggy          | 0 | 0 | 0 | 555  | 9.25     | 1.13863  | 36.60376 | Stalled      | chr4:95222197-95593630    | 369.434 |
| Pknox2        | 0 | 0 | 0 | 287  | 4.783333 | 0.067179 | 4.814589 | Unclassified | chr9:36698566-36956899    | 256.334 |
| Trip6         | 0 | 0 | 0 | 190  | 3.166667 | 4.94286  | 2.883319 | Elongating   | chr5:137751126-137757469  | 4.344   |
| Six6os1       | 0 | 0 | 0 | 16   | 0.266667 | 0.01342  | 0.718072 | Unclassified | chr12:73982095-74020752   | 36.658  |
| 3110079015Rik | 0 | 0 | 0 | 15   | 0.25     | 0.166807 | 0        | Unclassified | chr1:89364838-89372033    | 5.196   |
| Bmper         | 0 | 0 | 0 | 210  | 3.5      | 0.124927 | 2.255342 | Unclassified | chr9:23025519-23289646    | 262.128 |
| Maged1        | 0 | 0 | 0 | 76   | 1.266667 | 5.1175   | 5.509863 | Unclassified | chrX:91780812-91789413    | 6.602   |
| Snx27         | 0 | 0 | 0 | 430  | 7.166667 | 5.7826   | 24.00493 | Stalled      | chr3:94301465-94388624    | 85.16   |
| Fbxo44        | 0 | 0 | 0 | 147  | 2.45     | 6.09659  | 5.821695 | Unclassified | chr4:147526908-147536173  | 7.266   |
| Brdt          | 0 | 0 | 0 | 127  | 2.116667 | 0.734293 | 0.306744 | Unclassified | chr5:107758212-107816077  | 55.866  |
| Pth2          | 0 | 0 | 0 | 2    | 0.033333 | 0.239807 | 2        | Unclassified | chr7:52434551-52437208    | 0.658   |
| Olf133        | 0 | 0 | 0 | 2    | 0.033333 | 0.016456 | 0        | Unclassified | chr17:38283534-38286473   | 0.94    |
| Acads         | 0 | 0 | 0 | 164  | 2.733333 | 16.3016  | 7.828125 | Unclassified | chr5:115560307-115571322  | 9.016   |
| Cklf          | 0 | 0 | 0 | 289  | 4.816667 | 14.3578  | 22.56255 | Unclassified | chr8:106772802-106788836  | 14.035  |
| Rpl36a        | 0 | 0 | 0 | 501  | 8.35     | 99.1442  | 11.13998 | Unclassified | chrX:131118192-131122599  | 2.408   |
| B3galt6       | 0 | 0 | 0 | 542  | 9.033333 | 4.44274  | 12.55059 | Unclassified | chr4:155363574-155368787  | 3.214   |
| Sic2a9        | 0 | 0 | 0 | 457  | 7.616667 | 2.21422  | 17.33681 | Stalled      | chr5:38740511-38873545    | 131.035 |
| Asb10         | 0 | 0 | 0 | 15   | 0.25     | 0.127168 | 1.964081 | Unclassified | chr5:24038514-24048266    | 7.753   |
| Acyp2         | 0 | 0 | 0 | 251  | 4.183333 | 4.31508  | 89.81941 | Stalled      | chr11:30405991-30551396   | 143.406 |
| Olf975        | 0 | 0 | 0 | 3    | 0.05     | 0        | 1        | Unclassified | chr9:39757421-39760354    | 0.934   |
| Helb          | 0 | 0 | 0 | 430  | 7.166667 | 8.99276  | 25.90589 | Unclassified | chr10:119520663-119552021 | 29.359  |
| Nans          | 0 | 0 | 0 | 516  | 8.6      | 61.7756  | 8.155082 | Unclassified | chr4:46500200-46516310    | 14.111  |
| Pdxdc1        | 0 | 0 | 0 | 753  | 12.55    | 10.0349  | 23.69561 | Unclassified | chr16:13834022-13905228   | 69.207  |
| Strn3         | 0 | 0 | 0 | 1176 | 19.6     | 5.31     | 39.17134 | Unclassified | chr12:52710628-52794874   | 82.247  |
| Espnl         | 0 | 0 | 0 | 98   | 1.633333 | 0.129529 | 8.490714 | Unclassified | chr1:93216651-93244880    | 26.23   |
| Olf969        | 0 | 0 | 0 | 0    | 0        | 0.027385 | 0        | Unclassified | chr9:39600961-39603897    | 0.937   |
| Ypel1         | 0 | 0 | 0 | 175  | 2.916667 | 0.189233 | 1.918048 | Elongating   | chr16:17068403-17086781   | 16.379  |
| Psmd7         | 0 | 0 | 0 | 572  | 9.533333 | 57.4114  | 7.316196 | Unclassified | chr8:110104280-110114382  | 8.103   |
| A630033E08Rik | 0 | 0 | 0 | 78   | 1.3      | 0.588776 | 10.82972 | Stalled      | chr17:22983663-23006101   | 20.439  |
| D330045A20Rik | 0 | 0 | 0 | 21   | 0.35     | 0.052497 | 1.58792  | Unclassified | chrX:136012905-136089119  | 74.215  |
| Olf273        | 0 | 0 | 0 | 0    | 0        | 0        | 0        | Unclassified | chr4:52868429-52871383    | 0.955   |
| Dpy1911       | 0 | 0 | 0 | 668  | 11.13333 | 3.31343  | 42.6124  | Stalled      | chr9:24216224-24309584    | 91.361  |
| Mmp25         | 0 | 0 | 0 | 29   | 0.483333 | 0.683732 | 0.763301 | Unclassified | chr17:23766424-23784236   | 15.813  |
| Olf843        | 0 | 0 | 0 | 1    | 0.016667 | 0        | 0        | Unclassified | chr9:19052800-19055907    | 1.108   |
| Sln           | 0 | 0 | 0 | 8    | 0.133333 | 0        | 1.026316 | Unclassified | chr9:53696057-53701656    | 3.6     |
| Dio2          | 0 | 0 | 0 | 21   | 0.35     | 0.387722 | 1.784547 | Unclassified | chr12:91962991-91978878   | 13.888  |
| Dio1          | 0 | 0 | 0 | 23   | 0.383333 | 0        | 0.411435 | Unclassified | chr4:106964069-106981748  | 15.68   |
| Tgm5          | 0 | 0 | 0 | 54   | 0.9      | 0.086084 | 0.426365 | Unclassified | chr2:120871846-120913495  | 39.65   |
| Gtsf1         | 0 | 0 | 0 | 21   | 0.35     | 0.053401 | 0.574178 | Unclassified | chr15:103232891-103262858 | 27.968  |
| Crct1         | 0 | 0 | 0 | 1    | 0.016667 | 0.0895   | 1        | Unclassified | chr3:92818127-92821608    | 1.482   |
| Gm1008        | 0 | 0 | 0 | 12   | 0.2      | 0.042579 | 0.521887 | Unclassified | chr2:165176796-165189619  | 10.824  |
| 2810408M09Rik | 0 | 0 | 0 | 161  | 2.683333 | 8.19581  | 10.37024 | Stalled      | chr2:165315611-165320814  | 3.204   |
| Tgfa          | 0 | 0 | 0 | 115  | 1.916667 | 0.064557 | 0.829996 | Unclassified | chr6:86143409-86225151    | 79.743  |
| Tgfb1i1       | 0 | 0 | 0 | 66   | 1.1      | 0.232947 | 5.881475 | Unclassified | chr7:135388384-135397226  | 6.843   |
| Tsc22d1       | 0 | 0 | 0 | 131  | 2.183333 | 2.02347  | 8.725552 | Unclassified | chr14:76902371-76907568   | 3.198   |
| Klrb1b        | 0 | 0 | 0 | 19   | 0.316667 | 0.035956 | 0.491762 | Unclassified | chr6:128763723-128778333  | 12.611  |
| Tgfb3         | 0 | 0 | 0 | 108  | 1.8      | 0.619014 | 3.606638 | Unclassified | chr12:87397693-87421991   | 22.299  |
| Klhl8         | 0 | 0 | 0 | 147  | 2.45     | 0.994412 | 12.66413 | Stalled      | chr5:104291068-104342248  | 49.181  |
| Ptpdc1        | 0 | 0 | 0 | 129  | 2.15     | 0.10505  | 15.72578 | Stalled      | chr13:48673240-48722942   | 47.703  |
| Fam120a       | 0 | 0 | 0 | 2061 | 34.35    | 49.731   | 10.56129 | Unclassified | chr13:48974585-49065197   | 88.613  |
| 4933405L10Rik | 0 | 0 | 0 | 36   | 0.6      | 0.262256 | 9.072201 | Unclassified | chr8:108230202-108234068  | 1.867   |
| Defb50        | 0 | 0 | 0 | 8    | 0.133333 | 0        | 0        | Unclassified | chr8:22932010-22941768    | 7.759   |
| Lep           | 0 | 0 | 0 | 16   | 0.266667 | 0.035415 | 0        | Unclassified | chr6:29008220-29023876    | 13.657  |
| Lepr          | 0 | 0 | 0 | 49   | 0.816667 | 0.078925 | 0.668849 | Unclassified | chr4:101388011-101487959  | 97.949  |
| Kcnk12        | 0 | 0 | 0 | 82   | 1.366667 | 1.98905  | 1.207195 | Unclassified | chr17:88145160-88199334   | 52.175  |
| Gsdma3        | 0 | 0 | 0 | 7    | 0.116667 | 0.058135 | 2.185391 | Unclassified | chr11:98485673-98499403   | 11.731  |
| Ghdc          | 0 | 0 | 0 | 60   | 1        | 4.35708  | 8.943706 | Unclassified | chr11:100627645-100634271 | 4.627   |
| Bnip3l        | 0 | 0 | 0 | 198  | 3.3      | 10.4013  | 30.99853 | Stalled      | chr14:67604076-67629714   | 23.639  |
| Prrxl1        | 0 | 0 | 0 | 58   | 0.966667 | 0.090955 | 1.946054 | Unclassified | chr14:33411112-33462432   | 49.321  |
| Bnip2         | 0 | 0 | 0 | 329  | 5.483333 | 26.5438  | 19.28765 | Unclassified | chr9:69835307-69856124    | 18.818  |
| D630023F18Rik | 0 | 0 | 0 | 17   | 0.283333 | 0.22912  | 1.545807 | Unclassified | chr1:65153886-65171767    | 15.882  |
| Ly6g6e        | 0 | 0 | 0 | 12   | 0.2      | 0.293073 | 0.194946 | Unclassified | chr17:35211886-35215749   | 1.864   |
| Cyp4v3        | 0 | 0 | 0 | 172  | 2.866667 | 4.3892   | 35.4804  | Stalled      | chr8:46391155-46420550    | 27.396  |
| Rnf152        | 0 | 0 | 0 | 86   | 1.433333 | 0.288429 | 2.545109 | Unclassified | chr1:107173495-107255287  | 79.793  |
| Agphd1        | 0 | 0 | 0 | 79   | 1.316667 | 1.27062  | 31.26087 | Stalled      | chr9:54763096-54797731    | 32.636  |
| Olf1015       | 0 | 0 | 0 | 0    | 0        | 0.027298 | 0        | Unclassified | chr2:85623630-85626646    | 1.017   |
| Abhd6         | 0 | 0 | 0 | 208  | 3.466667 | 2.5239   | 17.12977 | Stalled      | chr14:8833415-8889069     | 53.655  |
| Nmur2         | 0 | 0 | 0 | 17   | 0.283333 | 0.015649 | 1.666617 | Unclassified | chr11:55838491-55856489   | 15.999  |
| Gm13363       | 0 | 0 | 0 | 431  | 7.183333 | 0        | 27.34255 | Unclassified | chr1:30998436-31008555    | 8.12    |
| Eif3f         | 0 | 0 | 0 | 410  | 6.833333 | 147.674  | 3.456879 | Unclassified | chr7:116075928-116085456  | 7.529   |
| Fnip1         | 0 | 0 | 0 | 536  | 8.933333 | 1.85482  | 34.11917 | Stalled      | chr11:54249680-54331743   | 80.064  |
| Spred3        | 0 | 0 | 0 | 59   | 0.983333 | 1.26683  | 1.625973 | Unclassified | chr7:29943847-29955666    | 9.82    |
| Pld1          | 0 | 0 | 0 | 124  | 2.066667 | 0.267656 | 1.101017 | Unclassified | chr3:27881092-28032284    | 149.193 |
| Pld2          | 0 | 0 | 0 | 52   | 0.866667 | 0.630439 | 8.286952 | Unclassified | chr11:70351665-70371612   | 17.948  |
| Ppp2r5d       | 0 | 0 | 0 | 430  | 7.166667 | 22.2291  | 13.46265 | Unclassified | chr17:46819940-46843951   | 22.012  |
| 4931406P16Rik | 0 | 0 | 0 | 208  | 3.466667 | 2.89368  | 0        | Unclassified | chr7:35021732-35072628    | 48.897  |
| Prr9          | 0 | 0 | 0 | 1    | 0.016667 | 0.08667  | 0        | Unclassified | chr3:91926125-91929869    | 1.745   |
| Kctd15        | 0 | 0 | 0 | 24   | 0.4      | 0.053158 | 1.209012 | Unclassified | chr7:35424035-35439860    | 13.826  |
| Ankrd23       | 0 | 0 | 0 | 79   | 1.316667 | 1.80337  | 1.42138  | Elongating   | chr1:36587378-36594574    | 5.197   |
| Olf1009       | 0 | 0 | 0 | 0    | 0        | 0        | 0        | Unclassified | chr2:85559563-85562508    | 0.946   |
| 9130409I23Rik | 0 | 0 | 0 | 11   | 0.183333 | 0.057373 | 0        | Unclassified | chr1:182979367-182990798  | 9.432   |
| Sfpq          | 0 | 0 | 0 | 1387 | 23.11667 | 78.8184  | 5.308855 | Unclassified | chr4:126696544-126708479  | 9.936   |
| 4930471M23Rik | 0 | 0 | 0 | 298  | 4.966667 | 3.28864  | 6.912289 | Unclassified | chr5:30948311-30962102    | 11.792  |
| Zc3hc1        | 0 | 0 | 0 | 360  | 6        | 15.3196  | 11.22637 | Unclassified | chr6:30316387-30343010    | 24.624  |
| E130303B06Rik | 0 | 0 | 0 | 97   | 1.616667 | 9.12214  | 1.744877 | Elongating   | chr8:108227551-108234068  | 4.518   |
| Tspan33       | 0 | 0 | 0 | 67   | 1.116667 | 1.60268  | 6.388895 | Unclassified | chr6:29642255-29668558    | 24.304  |

|               |   |          |   |      |          |          |          |              |                           |         |
|---------------|---|----------|---|------|----------|----------|----------|--------------|---------------------------|---------|
| Gchfr         | 0 | 0        | 0 | 59   | 0.983333 | 1.26329  | 0.698215 | Unclassified | chr2:118991523-118998125  | 4.603   |
| Atfp6v1h      | 0 | 0        | 0 | 556  | 9.266667 | 9.85709  | 24.31069 | Unclassified | chr1:5071253-5152630      | 79.378  |
| Aifm1         | 0 | 0        | 0 | 256  | 4.266667 | 17.0803  | 30.7043  | Stalled      | chrX:45828120-45868603    | 38.484  |
| Foxl2         | 0 | 0        | 0 | 10   | 0.166667 | 0.218865 | 0        | Unclassified | chr9:98854025-98858543    | 2.519   |
| Btaf1         | 0 | 0        | 0 | 1032 | 17.2     | 4.53281  | 43.31462 | Unclassified | chr19:36998568-37088547   | 87.98   |
| Spata2        | 0 | 0        | 0 | 551  | 9.183333 | 8.54669  | 9.166587 | Unclassified | chr2:167306635-167320374  | 11.74   |
| Cpa6          | 0 | 0        | 0 | 179  | 2.983333 | 0.039844 | 0        | Unclassified | chr1:10314807-10712024    | 395.218 |
| Smc5          | 0 | 0        | 0 | 574  | 9.566667 | 8.70675  | 20.18091 | Unclassified | chr19:23283221-23350367   | 65.147  |
| 1300010F03Rik | 0 | 0        | 0 | 1210 | 20.16667 | 3.61456  | 36.51026 | Stalled      | chr14:79246984-79602115   | 353.132 |
| Trpm3         | 0 | 0        | 0 | 515  | 8.583333 | 0.049197 | 3.124681 | Unclassified | chr19:22211606-23064374   | 850.769 |
| Fam92a        | 0 | 0        | 0 | 121  | 2.016667 | 7.51668  | 12.24104 | Stalled      | chr4:12080868-12101162    | 18.295  |
| Trim37        | 0 | 0        | 0 | 785  | 13.08333 | 6.44268  | 35.87602 | Unclassified | chr11:86938578-87034184   | 93.607  |
| Smarcc2       | 0 | 0        | 0 | 767  | 12.78333 | 23.4259  | 6.457328 | Unclassified | chr10:127894291-127927230 | 30.94   |
| I1C0022H11Rik | 0 | 0        | 0 | 6    | 0.1      | 0.124211 | 1.543457 | Unclassified | chr7:50430957-50447479    | 14.523  |
| Dynll2        | 0 | 0        | 0 | 300  | 5        | 32.611   | 12.07005 | Unclassified | chr11:87793027-87803035   | 8.009   |
| Thyn1         | 0 | 0        | 0 | 121  | 2.016667 | 7.12188  | 9.922995 | Unclassified | chr9:26805261-26814919    | 7.659   |
| Fam71e2       | 0 | 0        | 0 | 31   | 0.516667 | 0.047751 | 0.791906 | Unclassified | chr7:4704830-4724872      | 18.043  |
| Best2         | 0 | 0        | 0 | 36   | 0.6      | 0.391987 | 0.279506 | Unclassified | chr8:87531101-87540307    | 7.207   |
| Rpl39         | 0 | 0        | 0 | 521  | 8.683333 | 0        | 3.610367 | Unclassified | chrX:34622514-34627179    | 2.666   |
| 4933422H20Rik | 0 | 0        | 0 | 9    | 0.15     | 0.079605 | 1.056974 | Unclassified | chr11:115299858-115309582 | 7.725   |
| Lce1h         | 0 | 0        | 0 | 1    | 0.016667 | 0.027209 | 1        | Unclassified | chr3:92567136-92570987    | 1.852   |
| Lipf          | 0 | 0        | 0 | 10   | 0.166667 | 0.018945 | 0        | Unclassified | chr19:34033737-34051303   | 15.567  |
| 2810474019Rik | 0 | 0        | 0 | 664  | 11.06667 | 3.97816  | 14.89043 | Unclassified | chr6:149255935-149284185  | 26.251  |
| 2010106E10Rik | 0 | 0        | 0 | 17   | 0.283333 | 0        | 0        | Unclassified | chrX:109606882-109671952  | 63.071  |
| Smc6          | 0 | 0        | 0 | 754  | 12.56667 | 5.7532   | 53.05404 | Unclassified | chr12:11270691-11326591   | 53.901  |
| Gemin6        | 0 | 0        | 0 | 256  | 4.266667 | 12.06    | 32.04048 | Stalled      | chr17:80621828-80627837   | 4.901   |
| Mreg          | 0 | 0        | 0 | 922  | 15.36667 | 6.7811   | 9.006059 | Unclassified | chr1:72205807-72260881    | 53.075  |
| Bbs7          | 0 | 0        | 0 | 88   | 1.466667 | 0.942095 | 22.57131 | Stalled      | chr3:36472064-36514311    | 40.248  |
| 4832428D23Rik | 0 | 0        | 0 | 10   | 0.166667 | 0.036261 | 0        | Unclassified | chr1:44260914-44277776    | 14.863  |
| Gm973         | 0 | 0        | 0 | 194  | 3.233333 | 0.167557 | 0        | Unclassified | chr1:59571107-59691353    | 118.247 |
| Acsf6         | 0 | 0        | 0 | 90   | 1.5      | 0.153694 | 1.600852 | Unclassified | chr11:54115325-54175041   | 57.717  |
| Sic27a1       | 0 | 0        | 0 | 121  | 2.016667 | 3.1218   | 0.277903 | Unclassified | chr8:74090825-74110607    | 17.783  |
| Gp5           | 0 | 0        | 0 | 62   | 1.033333 | 3.3363   | 1.581314 | Unclassified | chr16:30307778-30312865   | 3.088   |
| Rasl11a       | 0 | 0        | 0 | 10   | 0.166667 | 1.59319  | 1.812415 | Unclassified | chr5:147654646-147659302  | 2.657   |
| Akirin2       | 0 | 0        | 0 | 370  | 6.166667 | 23.5348  | 13.03929 | Unclassified | chr4:34495863-34514157    | 16.295  |
| Dtx4          | 0 | 0        | 0 | 234  | 3.9      | 1.78425  | 4.022462 | Unclassified | chr19:12540825-12578486   | 35.662  |
| Cd177         | 0 | 0        | 0 | 22   | 0.366667 | 0.018889 | 0.446548 | Unclassified | chr7:25529001-25547330    | 16.33   |
| Vwa5b1        | 0 | 0        | 0 | 222  | 3.7      | 1.33614  | 0        | Unclassified | chr4:138124884-138181907  | 55.024  |
| Gp1ba         | 0 | 0        | 0 | 77   | 1.283333 | 0.244154 | 0.567791 | Unclassified | chr11:70450623-70455557   | 2.935   |
| Lrp2          | 0 | 0        | 0 | 137  | 2.283333 | 0.051352 | 5.080552 | Unclassified | chr2:69262391-69426124    | 161.734 |
| Sgol2         | 0 | 0        | 0 | 283  | 4.716667 | 3.66135  | 30.84631 | Stalled      | chr1:58050817-58083121    | 30.305  |
| Mbd3l2        | 0 | 0        | 0 | 6    | 0.1      | 0.029764 | 0        | Unclassified | chr9:18233058-18250758    | 15.701  |
| 4631416L12Rik | 0 | 0        | 0 | 227  | 3.783333 | 0.216683 | 1.421947 | Unclassified | chr3:62140698-62266143    | 123.446 |
| Synpr         | 0 | 0        | 0 | 188  | 3.133333 | 0.05308  | 0        | Unclassified | chr14:14115293-14447982   | 330.69  |
| Fxc1          | 0 | 0        | 0 | 296  | 4.933333 | 33.5044  | 257      | Unclassified | chr7:112787053-112790359  | 1.307   |
| Ckmt2         | 0 | 0        | 0 | 40   | 0.666667 | 0.060373 | 0.365854 | Unclassified | chr13:91992991-92018490   | 23.5    |
| Nrbp1         | 0 | 0        | 0 | 350  | 5.833333 | 15.7658  | 18.91442 | Unclassified | chr5:31541290-31553935    | 10.646  |
| Ube2s         | 0 | 0        | 0 | 563  | 9.383333 | 90.5881  | 8.046308 | Unclassified | chr7:4759615-4765942      | 4.328   |
| Tas2r136      | 0 | 0        | 0 | 3    | 0.05     | 0.039074 | 0        | Unclassified | chr6:132727196-132730180  | 0.985   |
| Nnt           | 0 | 0        | 0 | 291  | 4.85     | 5.00432  | 41.97598 | Stalled      | chr13:120124333-12019945  | 73.613  |
| Olfr1408      | 0 | 0        | 0 | 3    | 0.05     | 0.020589 | 3        | Unclassified | chr1:175060413-175063346  | 0.934   |
| Shisa3        | 0 | 0        | 0 | 30   | 0.5      | 0.95541  | 3.831329 | Unclassified | chr5:67997121-68003511    | 4.391   |
| Nnat          | 0 | 0        | 0 | 37   | 0.616667 | 0.440486 | 0.818482 | Unclassified | chr2:157383845-157388255  | 2.411   |
| Olfr672       | 0 | 0        | 0 | 1    | 0.016667 | 0.020457 | 0        | Unclassified | chr7:112144477-112147416  | 0.94    |
| Olfr214       | 0 | 0        | 0 | 4    | 0.066667 | 0.093161 | 2        | Unclassified | chr6:116504444-116507407  | 0.964   |
| Olfr1013      | 0 | 0        | 0 | 0    | 0        | 0        | 0        | Unclassified | chr2:85607959-85610877    | 0.919   |
| Olfr608       | 0 | 0        | 0 | 0    | 0        | 0.026953 | 0        | Unclassified | chr7:110616554-110619505  | 0.952   |
| Olfr551       | 0 | 0        | 0 | 5    | 0.083333 | 0        | 3        | Unclassified | chr7:109736307-109739255  | 0.949   |
| Olfr678       | 0 | 0        | 0 | 1    | 0.016667 | 0        | 0        | Unclassified | chr7:112215982-112218924  | 0.943   |
| Nodal         | 0 | 0        | 0 | 15   | 0.25     | 0.25077  | 0.693309 | Unclassified | chr10:60878719-60888085   | 7.367   |
| Cd3g          | 0 | 0        | 0 | 5    | 0.083333 | 0.187923 | 1.66276  | Unclassified | chr9:44777654-44790514    | 10.861  |
| Sntb2         | 0 | 0        | 0 | 210  | 3.5      | 1.24575  | 22.79399 | Stalled      | chr8:109457649-109538092  | 78.444  |
| Cd209c        | 0 | 0        | 0 | 5    | 0.083333 | 0.016537 | 0        | Unclassified | chr8:3940221-3948863      | 6.643   |
| Pax1          | 0 | 0        | 0 | 13   | 0.216667 | 0.097241 | 1.002991 | Unclassified | chr2:147188729-147200782  | 10.054  |
| Mfi2          | 0 | 0        | 0 | 64   | 1.066667 | 0.133374 | 5.191198 | Unclassified | chr16:31876895-31899105   | 20.211  |
| Cul5          | 0 | 0        | 0 | 733  | 12.21667 | 4.80189  | 40.70684 | Unclassified | chr9:53422686-53477612    | 52.927  |
| Olfr125       | 0 | 0        | 0 | 3    | 0.05     | 0.034391 | 3        | Unclassified | chr17:37969855-37972973   | 1.119   |
| D130043K22Rik | 0 | 0        | 0 | 140  | 2.333333 | 0.172532 | 18.6259  | Stalled      | chr13:24934999-24993139   | 56.141  |
| Olfr122       | 0 | 0        | 0 | 0    | 0        | 0.007964 | 0        | Unclassified | chr17:37906572-37909565   | 0.994   |
| Olfr114       | 0 | 0        | 0 | 1    | 0.016667 | 0.027298 | 0        | Unclassified | chr17:37726357-37729296   | 0.94    |
| Olfr981       | 0 | 0        | 0 | 1    | 0.016667 | 0.054947 | 0        | Unclassified | chr9:39827979-39830912    | 0.934   |
| Olfr801       | 0 | 0        | 0 | 3    | 0.05     | 0        | 0        | Unclassified | chr10:129106616-129109573 | 0.958   |
| Olfr780       | 0 | 0        | 0 | 1    | 0.016667 | 0        | 1        | Unclassified | chr10:128756680-128759619 | 0.94    |
| Olfr1366      | 0 | 0        | 0 | 1    | 0.016667 | 0.040816 | 0        | Unclassified | chr13:21628842-21631896   | 1.055   |
| 2310008H04Rik | 0 | 0        | 0 | 674  | 11.23333 | 3.66997  | 37.35436 | Stalled      | chr16:15889319-16148926   | 257.608 |
| Laptm4b       | 0 | 0        | 0 | 93   | 1.55     | 2.60722  | 9.192406 | Unclassified | chr15:34165780-34214050   | 46.271  |
| Cstf3         | 0 | 0        | 0 | 884  | 14.73333 | 15.9398  | 19.46547 | Unclassified | chr2:104428640-104505582  | 74.943  |
| Olfr1324      | 0 | 0        | 0 | 0    | 0        | 0        | 0        | Unclassified | chrX:47778672-47781671    | 1       |
| Olfr1484      | 0 | 0        | 0 | 1    | 0.016667 | 0.009524 | 1        | Unclassified | chr19:13657795-13660743   | 0.949   |
| Olfr1018      | 0 | 0        | 0 | 3    | 0.05     | 0.041078 | 3        | Unclassified | chr2:85661129-85664065    | 0.937   |
| Cml2          | 0 | 0        | 0 | 2    | 0.033333 | 0.083487 | 0        | Unclassified | chr6:85815415-85821131    | 3.717   |
| Tac4          | 0 | 0        | 0 | 305  | 5.083333 | 0.092214 | 0.368061 | Unclassified | chr11:95120842-95130575   | 7.734   |
| Akap14        | 0 | 0        | 0 | 94   | 1.566667 | 0.064368 | 0.323064 | Unclassified | chrX:34690692-34710837    | 18.146  |
| Hist1h2an     | 0 | 0        | 0 | 271  | 4.516667 | 0        | 253      | Unclassified | chr13:21878694-21881087   | 0.394   |
| Hist1h2af     | 0 | 5.987342 | 0 | 163  | 2.716667 | 0        | 152      | Unclassified | chr13:23623779-23626172   | 0.394   |
| Hist1h2ab     | 0 | 0        | 0 | 317  | 5.283333 | 0        | 313      | Unclassified | chr13:23840956-23843462   | 0.507   |

|                      |   |   |   |      |          |          |          |              |                           |         |
|----------------------|---|---|---|------|----------|----------|----------|--------------|---------------------------|---------|
| <b>Olf1033</b>       | 0 | 0 | 0 | 6    | 0.1      | 0.013688 | 0        | Unclassified | chr2:85858796-85884965    | 24.17   |
| <b>Olf1043</b>       | 0 | 0 | 0 | 1    | 0.016667 | 0        | 1        | Unclassified | chr2:86002159-86005104    | 0.946   |
| <b>Olf1020</b>       | 0 | 0 | 0 | 1    | 0.016667 | 0        | 0        | Unclassified | chr2:85687610-85690564    | 0.955   |
| <b>Rmem114</b>       | 0 | 0 | 0 | 28   | 0.466667 | 0.118501 | 0.363712 | Unclassified | chr16:8409368-8427229     | 15.862  |
| <b>Rhox4c</b>        | 0 | 0 | 0 | 2    | 0.033333 | 0.005838 | 0.791188 | Unclassified | chrX:34892843-34899631    | 4.789   |
| <b>Gck</b>           | 0 | 0 | 0 | 80   | 1.333333 | 0.199809 | 0        | Unclassified | chr11:5800825-5851602     | 48.778  |
| <b>Prosc</b>         | 0 | 0 | 0 | 416  | 6.933333 | 9.38344  | 13.17577 | Unclassified | chr8:28151026-28166604    | 13.579  |
| <b>4931409K22Rik</b> | 0 | 0 | 0 | 20   | 0.333333 | 0.05926  | 0        | Unclassified | chr5:24049251-24063287    | 12.037  |
| <b>Vdac3</b>         | 0 | 0 | 0 | 571  | 9.516667 | 16.6129  | 36.21496 | Unclassified | chr8:23687572-23706230    | 16.659  |
| <b>Vcl</b>           | 0 | 0 | 0 | 410  | 6.833333 | 2.05844  | 33.36338 | Stalled      | chr14:21746654-21852895   | 104.242 |
| <b>Amfr</b>          | 0 | 0 | 0 | 720  | 12       | 23.1693  | 9.555839 | Unclassified | chr8:96495487-96538540    | 41.054  |
| <b>Mtap9</b>         | 0 | 0 | 0 | 87   | 1.45     | 0.253409 | 9.991168 | Unclassified | chr3:82159993-82199190    | 37.198  |
| <b>Tmem159</b>       | 0 | 0 | 0 | 44   | 0.733333 | 1.52572  | 6.450393 | Unclassified | chr7:127243939-127264500  | 18.562  |
| <b>4833424O15Rik</b> | 0 | 0 | 0 | 40   | 0.666667 | 0.031692 | 1.506821 | Unclassified | chr3:117276378-117392424  | 114.047 |
| <b>Ii18r1</b>        | 0 | 0 | 0 | 31   | 0.516667 | 0.254595 | 2.262293 | Unclassified | chr1:40520850-40557698    | 34.849  |
| <b>Bnpl1</b>         | 0 | 0 | 0 | 60   | 1        | 0.082261 | 1.426854 | Unclassified | chr3:95045216-95057115    | 9.9     |
| <b>Olf1049</b>       | 0 | 0 | 0 | 0    | 0        | 0.027618 | 0        | Unclassified | chr2:86094921-86097848    | 0.928   |
| <b>Kcnf1</b>         | 0 | 0 | 0 | 8    | 0.133333 | 0.141898 | 1.459168 | Unclassified | chr12:17178907-17185694   | 4.788   |
| <b>Pik3cb</b>        | 0 | 0 | 0 | 149  | 2.483333 | 0.479192 | 6.114761 | Unclassified | chr9:98938820-99042630    | 101.811 |
| <b>Olf955</b>        | 0 | 0 | 0 | 2    | 0.033333 | 0        | 1        | Unclassified | chr9:39277364-39280309    | 0.946   |
| <b>Gm15091</b>       | 0 | 0 | 0 | 1    | 0.016667 | 0        | 0        | Unclassified | chrX:146374197-146419525  | 43.329  |
| <b>Mdga1</b>         | 0 | 0 | 0 | 135  | 2.25     | 0.365843 | 2.549171 | Unclassified | chr17:29964902-30026827   | 59.926  |
| <b>Olf765</b>        | 0 | 0 | 0 | 0    | 0        | 0        | 0        | Unclassified | chr10:128483187-128486117 | 0.931   |
| <b>Klc4</b>          | 0 | 0 | 0 | 62   | 1.033333 | 3.59873  | 1.836455 | Unclassified | chr17:46767579-46784093   | 14.515  |
| <b>Psap1</b>         | 0 | 0 | 0 | 15   | 0.25     | 0.100639 | 2.232156 | Unclassified | chr5:36544669-36549216    | 2.548   |
| <b>Lypd5</b>         | 0 | 0 | 0 | 9    | 0.15     | 0.041122 | 1.423335 | Unclassified | chr7:25132242-25138852    | 4.611   |
| <b>Arhgap22</b>      | 0 | 0 | 0 | 288  | 4.8      | 0.083864 | 2.458481 | Unclassified | chr14:34028008-34183122   | 153.115 |
| <b>Tanc2</b>         | 0 | 0 | 0 | 736  | 12.26667 | 1.70301  | 10.50763 | Stalled      | chr11:105449299-105790617 | 339.319 |
| <b>Ocel1</b>         | 0 | 0 | 0 | 378  | 6.3      | 6.62099  | 14.11323 | Unclassified | chr8:73893196-73897587    | 2.392   |
| <b>1700080E11Rik</b> | 0 | 0 | 0 | 3    | 0.05     | 0        | 0.270073 | Unclassified | chr9:105045673-105049412  | 1.74    |
| <b>Vmn2r5</b>        | 0 | 0 | 0 | 2    | 0.033333 | 0.001061 | 0        | Unclassified | chr3:64294742-64313607    | 16.866  |
| <b>Olf591</b>        | 0 | 0 | 0 | 0    | 0        | 0.020327 | 0        | Unclassified | chr7:110321204-110324149  | 0.946   |
| <b>2410137M14Rik</b> | 0 | 0 | 0 | 38   | 0.633333 | 1.22977  | 1.241177 | Unclassified | chr17:37114645-37120182   | 3.538   |
| <b>Gon4l</b>         | 0 | 0 | 0 | 510  | 8.5      | 10.2057  | 6.792866 | Unclassified | chr3:88637149-88714020    | 74.872  |
| <b>Prpf39</b>        | 0 | 0 | 0 | 449  | 7.483333 | 6.33782  | 16.29192 | Unclassified | chr12:66135320-66164373   | 27.054  |
| <b>Npm2</b>          | 0 | 0 | 0 | 24   | 0.4      | 0.102839 | 1.04986  | Unclassified | chr14:71047108-71054891   | 5.784   |
| <b>Klk1b11</b>       | 0 | 0 | 0 | 6    | 0.1      | 0.035894 | 0        | Unclassified | chr7:51249248-51255245    | 3.998   |
| <b>Klk1</b>          | 0 | 0 | 0 | 4    | 0.066667 | 0.020649 | 0        | Unclassified | chr7:51478806-51484987    | 4.182   |
| <b>Ebag9</b>         | 0 | 0 | 0 | 400  | 6.666667 | 9.58808  | 46.83553 | Stalled      | chr15:44449186-44472572   | 21.387  |
| <b>Klk1b21</b>       | 0 | 0 | 0 | 5    | 0.083333 | 0.011702 | 0        | Unclassified | chr7:51355661-51361947    | 4.287   |
| <b>Klk1b16</b>       | 0 | 0 | 0 | 9    | 0.15     | 0.018561 | 1.302975 | Unclassified | chr7:51390136-51396974    | 4.839   |
| <b>Erc5</b>          | 0 | 0 | 0 | 411  | 6.85     | 3.28221  | 54.89962 | Stalled      | chr1:44202588-44238105    | 33.518  |
| <b>Slc6a20b</b>      | 0 | 0 | 0 | 81   | 1.35     | 0.060394 | 1.719728 | Unclassified | chr9:123502937-123543683  | 38.747  |
| <b>Slc6a18</b>       | 0 | 0 | 0 | 26   | 0.433333 | 0.013584 | 0.79814  | Unclassified | chr13:73799198-73817471   | 16.274  |
| <b>Cxcr4</b>         | 0 | 0 | 0 | 705  | 11.75    | 8.74538  | 3.18211  | Unclassified | chr1:130484775-130490876  | 4.102   |
| <b>Cxcr3</b>         | 0 | 0 | 0 | 4    | 0.066667 | 0.326563 | 3        | Unclassified | chrX:98926874-98931486    | 2.613   |
| <b>Cxcr2</b>         | 0 | 0 | 0 | 7    | 0.116667 | 0.022791 | 0.510364 | Unclassified | chr1:74198567-74207820    | 7.254   |
| <b>Cmas</b>          | 0 | 0 | 0 | 503  | 8.383333 | 19.0532  | 4.228498 | Unclassified | chr6:142703205-142724232  | 19.028  |
| <b>Fam73a</b>        | 0 | 0 | 0 | 431  | 7.183333 | 2.24355  | 18.81995 | Stalled      | chr3:151936425-152005371  | 66.947  |
| <b>Vwa2</b>          | 0 | 0 | 0 | 47   | 0.783333 | 0.072632 | 0.448962 | Unclassified | chr19:56946905-56986568   | 37.664  |
| <b>Ube3c</b>         | 0 | 0 | 0 | 806  | 13.43333 | 4.64898  | 28.56591 | Unclassified | chr5:29893781-30002617    | 106.837 |
| <b>Gm4792</b>        | 0 | 0 | 0 | 7    | 0.116667 | 0.089126 | 0.443703 | Unclassified | chr10:93756414-93763401   | 4.988   |
| <b>Lpin2</b>         | 0 | 0 | 0 | 450  | 7.5      | 3.24417  | 7.978881 | Unclassified | chr17:71531317-71599158   | 65.842  |
| <b>Lpin3</b>         | 0 | 0 | 0 | 37   | 0.616667 | 0.068044 | 0.828818 | Unclassified | chr2:160704468-160731528  | 25.061  |
| <b>Mta1</b>          | 0 | 0 | 0 | 1208 | 20.13333 | 25.4352  | 2.600883 | Elongating   | chr12:114334488-114375417 | 38.93   |
| <b>Olf417</b>        | 0 | 0 | 0 | 1    | 0.016667 | 0.027497 | 1        | Unclassified | chr1:176297049-176299979  | 0.931   |
| <b>Suhw4</b>         | 0 | 0 | 0 | 957  | 15.95    | 2.71827  | 30.79666 | Unclassified | chr9:72120705-72211578    | 88.874  |
| <b>Speer2</b>        | 0 | 0 | 0 | 11   | 0.183333 | 0        | 0.394836 | Unclassified | chr16:69857118-69865989   | 6.872   |
| <b>Jub</b>           | 0 | 0 | 0 | 39   | 0.65     | 0.49185  | 2.10829  | Unclassified | chr14:55186308-55198253   | 9.946   |
| <b>Ush1g</b>         | 0 | 0 | 0 | 23   | 0.383333 | 0.092609 | 0.871046 | Unclassified | chr11:115176505-115185232 | 6.728   |
| <b>Glpr2</b>         | 0 | 0 | 0 | 175  | 2.916667 | 0.107877 | 0        | Unclassified | chr11:67519933-67586655   | 64.723  |
| <b>Acad5b</b>        | 0 | 0 | 0 | 192  | 3.2      | 3.03974  | 58.99777 | Stalled      | chr7:138552114-138589724  | 35.611  |
| <b>Ttil7</b>         | 0 | 0 | 0 | 101  | 1.683333 | 0.025258 | 0.564052 | Unclassified | chr3:146513330-146645714  | 130.385 |
| <b>Pcdhb21</b>       | 0 | 0 | 0 | 1    | 0.016667 | 0.107724 | 0        | Unclassified | chr18:37671305-37676017   | 2.713   |
| <b>Pcdhb22</b>       | 0 | 0 | 0 | 2    | 0.033333 | 0.159162 | 0        | Unclassified | chr18:37676006-37681073   | 3.068   |
| <b>Mycbpap</b>       | 0 | 0 | 0 | 49   | 0.816667 | 0.41583  | 3.351645 | Unclassified | chr11:94362660-94384816   | 20.157  |
| <b>Pcdhb20</b>       | 0 | 0 | 0 | 5    | 0.083333 | 0.020416 | 0.545248 | Unclassified | chr18:37661917-37667314   | 3.398   |
| <b>Olf23</b>         | 0 | 0 | 0 | 4    | 0.066667 | 0.026209 | 3        | Unclassified | chr11:73751749-73754727   | 0.979   |
| <b>Hhip1</b>         | 0 | 0 | 0 | 30   | 0.5      | 0.162357 | 0.87575  | Unclassified | chr12:109542479-109566510 | 22.032  |
| <b>Mlph</b>          | 0 | 0 | 0 | 52   | 0.866667 | 0.034307 | 0        | Unclassified | chr1:92809676-92847718    | 36.043  |
| <b>Tomm22</b>        | 0 | 0 | 0 | 184  | 3.066667 | 37.2996  | 6.280223 | Unclassified | chr15:79499297-79503292   | 1.996   |
| <b>Gm381</b>         | 0 | 0 | 0 | 2    | 0.033333 | 0        | 1        | Unclassified | chrX:123440112-123444149  | 2.038   |
| <b>Eif3l</b>         | 0 | 0 | 0 | 782  | 13.03333 | 68.5051  | 8.768137 | Unclassified | chr15:78903652-78924830   | 19.179  |
| <b>Btbd2</b>         | 0 | 0 | 0 | 596  | 9.933333 | 6.53475  | 1.40997  | Elongating   | chr10:80105361-80121816   | 14.456  |
| <b>Olf24</b>         | 0 | 0 | 0 | 0    | 0        | 0        | 0        | Unclassified | chr9:18559135-18562077    | 0.943   |
| <b>Fbxo3</b>         | 0 | 0 | 0 | 362  | 6.033333 | 10.5924  | 13.49367 | Unclassified | chr2:103865955-103903394  | 35.44   |
| <b>Fabp12</b>        | 0 | 0 | 0 | 234  | 3.9      | 0.086735 | 0.989059 | Unclassified | chr3:10244208-10303183    | 56.976  |
| <b>Exog</b>          | 0 | 0 | 0 | 496  | 8.266667 | 2.81812  | 10.4902  | Unclassified | chr9:119352077-119374635  | 20.559  |
| <b>Ipmk</b>          | 0 | 0 | 0 | 742  | 12.36667 | 6.7258   | 28.57433 | Unclassified | chr10:70808540-70848633   | 38.094  |
| <b>Iffo1</b>         | 0 | 0 | 0 | 1167 | 19.45    | 10.1227  | 2.419285 | Elongating   | chr6:125093258-125111800  | 16.543  |
| <b>Cdh12</b>         | 0 | 0 | 0 | 161  | 2.683333 | 0.027274 | 0        | Unclassified | chr15:21039206-21519288   | 478.083 |
| <b>Neil2</b>         | 0 | 0 | 0 | 232  | 3.866667 | 0.011419 | 1.145391 | Unclassified | chr15:95049880-95361137   | 309.258 |
| <b>Pin4</b>          | 0 | 0 | 0 | 130  | 2.166667 | 6.95264  | 6.651094 | Unclassified | chrX:99312803-99323012    | 8.21    |
| <b>Tagln</b>         | 0 | 0 | 0 | 246  | 4.1      | 0        | 1.609034 | Elongating   | chr9:45737710-45745981    | 6.272   |
| <b>Ii1f5</b>         | 0 | 0 | 0 | 10   | 0.166667 | 0.027741 | 0        | Unclassified | chr2:24130473-24137952    | 5.48    |
| <b>Fn3k</b>          | 0 | 0 | 0 | 25   | 0.416667 | 0.585379 | 3.332438 | Unclassified | chr11:121294266-121311803 | 15.538  |

|               |   |   |   |      |          |          |          |              |                           |         |
|---------------|---|---|---|------|----------|----------|----------|--------------|---------------------------|---------|
| 5730508B09Rik | 0 | 0 | 0 | 192  | 3.2      | 3.32556  | 15.01028 | Stalled      | chr3:127572605-127601241  | 26.637  |
| Tal1          | 0 | 0 | 0 | 18   | 0.3      | 0.193961 | 0.412413 | Unclassified | chr4:114730131-114744360  | 12.23   |
| Nt5c3         | 0 | 0 | 0 | 602  | 10.03333 | 8.40727  | 15.43583 | Unclassified | chr6:56832394-56875926    | 41.533  |
| Tmem180       | 0 | 0 | 0 | 215  | 3.583333 | 7.36283  | 11.42347 | Unclassified | chr19:46429369-46449744   | 18.376  |
| Olfm1         | 0 | 0 | 0 | 106  | 1.766667 | 1.73418  | 0.528616 | Unclassified | chr2:28046612-28086256    | 37.645  |
| Tmem67        | 0 | 0 | 0 | 152  | 2.533333 | 1.93794  | 11.77919 | Stalled      | chr4:11966505-12017104    | 48.6    |
| Actn4         | 0 | 0 | 0 | 1454 | 24.23333 | 49.5584  | 16.02922 | Unclassified | chr7:29678272-29749299    | 69.028  |
| Capn12        | 0 | 0 | 0 | 173  | 2.883333 | 0.077871 | 0.183272 | Unclassified | chr7:29664674-29678604    | 11.931  |
| Gucy1a3       | 0 | 0 | 0 | 39   | 0.65     | 0.088142 | 0        | Unclassified | chr3:81896349-81951799    | 53.451  |
| Cdh1          | 0 | 0 | 0 | 88   | 1.466667 | 0.342691 | 2.766517 | Unclassified | chr8:109125267-109194146  | 66.88   |
| P2rx5         | 0 | 0 | 0 | 272  | 4.533333 | 0.318854 | 1.244254 | Elongating   | chr11:72972031-72986191   | 12.161  |
| Clmn          | 0 | 0 | 0 | 142  | 2.366667 | 0.055293 | 0        | Unclassified | chr12:106001323-106105286 | 101.964 |
| Allc          | 0 | 0 | 0 | 23   | 0.383333 | 0.043892 | 0        | Unclassified | chr12:29238619-29269348   | 28.73   |
| Tm2d1         | 0 | 0 | 0 | 334  | 5.566667 | 4.64403  | 18.41228 | Unclassified | chr4:98022060-98051956    | 27.897  |
| Atn1          | 0 | 0 | 0 | 703  | 11.71667 | 0        | 1.907632 | Elongating   | chr6:124692561-124708505  | 13.945  |
| Drd3          | 0 | 0 | 0 | 65   | 1.083333 | 0.086016 | 0        | Unclassified | chr16:43760354-43822952   | 60.599  |
| Drd4          | 0 | 0 | 0 | 11   | 0.183333 | 0.479653 | 0.665889 | Unclassified | chr7:148475904-148480900  | 2.997   |
| Drp2          | 0 | 0 | 0 | 32   | 0.533333 | 0.135817 | 0.644648 | Unclassified | chrX:130937318-130991112  | 51.795  |
| Drg1          | 0 | 0 | 0 | 879  | 14.65    | 31.6145  | 27.23714 | Unclassified | chr11:3149924-3168389     | 16.466  |
| Hibadh        | 0 | 0 | 0 | 649  | 10.81667 | 10.4962  | 37.01016 | Stalled      | chr6:52496223-52529294    | 94.072  |
| Optn          | 0 | 0 | 0 | 361  | 6.016667 | 5.69887  | 7.939727 | Unclassified | chr2:4941687-4986984      | 43.298  |
| Pak1          | 0 | 0 | 0 | 51   | 0.85     | 0.62793  | 8.51913  | Unclassified | chr7:104989448-105060891  | 69.444  |
| Pah           | 0 | 0 | 0 | 48   | 0.8      | 0.053825 | 1.175803 | Unclassified | chr10:86982539-87046882   | 62.344  |
| Fbln1         | 0 | 0 | 0 | 125  | 2.083333 | 0.083941 | 2.399177 | Unclassified | chr15:85034437-85116724   | 80.288  |
| Pafah1b2      | 0 | 0 | 0 | 506  | 8.433333 | 9.93795  | 14.30141 | Unclassified | chr9:45773393-45794954    | 19.562  |
| Kctd6         | 0 | 0 | 0 | 140  | 2.333333 | 1.43231  | 14.41425 | Stalled      | chr14:9044661-9056083     | 9.423   |
| Fbn2          | 0 | 0 | 0 | 159  | 2.65     | 0.069707 | 1.686519 | Unclassified | chr18:58168276-58371580   | 201.305 |
| 5430419D17Rik | 0 | 0 | 0 | 60   | 1        | 0.008754 | 0        | Unclassified | chr7:138315915-138394459  | 76.545  |
| E130309D02Rik | 0 | 0 | 0 | 872  | 14.53333 | 23.9442  | 8.034915 | Unclassified | chr5:144062750-144079039  | 14.29   |
| Pafah1b1      | 0 | 0 | 0 | 1239 | 20.65    | 16.8664  | 33.48394 | Unclassified | chr11:74487451-74539886   | 50.436  |
| Grhl3         | 0 | 0 | 0 | 78   | 1.3      | 0.138355 | 0.586896 | Unclassified | chr4:135097802-135131535  | 31.734  |
| Ccdc43        | 0 | 0 | 0 | 340  | 5.666667 | 9.62796  | 22.1322  | Unclassified | chr11:102546001-102561039 | 13.039  |
| Zkscan6       | 0 | 0 | 0 | 489  | 8.15     | 3.77366  | 19.47326 | Unclassified | chr11:65618745-65642741   | 21.997  |
| Ltbr          | 0 | 0 | 0 | 19   | 0.316667 | 0.147032 | 1.632299 | Unclassified | chr6:125256588-125265888  | 7.301   |
| Nat8          | 0 | 0 | 0 | 2    | 0.033333 | 0.027923 | 0        | Unclassified | chr6:85780381-85783884    | 1.504   |
| Rerg          | 0 | 0 | 0 | 133  | 2.216667 | 0.157344 | 0.474497 | Unclassified | chr6:137003345-137121017  | 115.673 |
| H2afj         | 0 | 0 | 0 | 480  | 8        | 82.0158  | 4.307052 | Unclassified | chr6:136754768-136758595  | 1.828   |
| Dapk2         | 0 | 0 | 0 | 341  | 5.683333 | 2.91911  | 2.825334 | Unclassified | chr9:66004032-66120049    | 114.018 |
| Sparc         | 0 | 0 | 0 | 37   | 0.616667 | 0.22268  | 1.303317 | Unclassified | chr11:55208002-55235582   | 25.581  |
| Spam1         | 0 | 0 | 0 | 5    | 0.083333 | 0        | 0        | Unclassified | chr6:24739198-24751048    | 9.851   |
| Mafb          | 0 | 0 | 0 | 19   | 0.316667 | 0.302539 | 2.036209 | Unclassified | chr2:160189412-160194801  | 3.39    |
| Lrrc57        | 0 | 0 | 0 | 345  | 5.75     | 9.86923  | 41.7851  | Stalled      | chr2:120429975-120437244  | 5.27    |
| Zxdb          | 0 | 0 | 0 | 17   | 0.283333 | 2.60613  | 0        | Unclassified | chrX:91967907-91975530    | 5.624   |
| Snx19         | 0 | 0 | 0 | 522  | 8.7      | 5.9507   | 10.62064 | Unclassified | chr9:30232913-30274311    | 39.399  |
| Penk          | 0 | 0 | 0 | 10   | 0.166667 | 0.154304 | 2.829547 | Unclassified | chr4:4060682-4067592      | 4.911   |
| Prss43        | 0 | 0 | 0 | 5    | 0.083333 | 0.03217  | 0        | Unclassified | chr9:110727193-110734008  | 4.816   |
| Tas2r116      | 0 | 0 | 0 | 1    | 0.016667 | 0        | 0        | Unclassified | chr6:132803455-132806373  | 0.919   |
| Plip          | 0 | 0 | 0 | 325  | 5.416667 | 0.393513 | 1.672438 | Elongating   | chr8:97198794-97222142    | 21.349  |
| Etv4          | 0 | 0 | 0 | 163  | 2.716667 | 0.817327 | 5.423808 | Unclassified | chr11:101631055-101648624 | 15.57   |
| Fzef2         | 0 | 0 | 0 | 9    | 0.15     | 0.122378 | 0.746082 | Unclassified | chr14:13174405-13180379   | 3.975   |
| Gm1564        | 0 | 0 | 0 | 17   | 0.283333 | 0.039237 | 0.51062  | Unclassified | chr11:102524901-102543551 | 16.651  |
| Lsm12         | 0 | 0 | 0 | 661  | 11.01667 | 21.0435  | 11.31259 | Unclassified | chr11:102024802-102048570 | 21.769  |
| Selenbp2      | 0 | 0 | 0 | 8    | 0.133333 | 0.611007 | 0        | Unclassified | chr3:94495494-94508328    | 10.835  |
| Spp2          | 0 | 0 | 0 | 16   | 0.266667 | 0        | 0.568181 | Unclassified | chr1:90301593-90323013    | 19.421  |
| Nagpa         | 0 | 0 | 0 | 335  | 5.583333 | 12.142   | 11.33387 | Unclassified | chr16:5195372-5206105     | 8.734   |
| Si            | 0 | 0 | 0 | 106  | 1.766667 | 0.646205 | 2.11005  | Unclassified | chr10:128141313-128157294 | 13.982  |
| E030025P04Rik | 0 | 0 | 0 | 11   | 0.183333 | 0.059445 | 1.619048 | Unclassified | chr11:109006064-109007683 | 5.08    |
| Defb35        | 0 | 0 | 0 | 1    | 0.016667 | 0        | 0        | Unclassified | chr8:23046823-23051350    | 2.528   |
| Defb15        | 0 | 0 | 0 | 4    | 0.066667 | 0.058034 | 1.310107 | Unclassified | chr8:23040284-23045182    | 2.899   |
| Fam167b       | 0 | 0 | 0 | 28   | 0.466667 | 1.52058  | 0.286087 | Unclassified | chr4:129254058-129257824  | 1.767   |
| Siah1b        | 0 | 0 | 0 | 284  | 4.733333 | 2.91056  | 15.587   | Unclassified | chrX:160508634-160515981  | 5.348   |
| Siah2         | 0 | 0 | 0 | 1263 | 21.05    | 39.7461  | 12.23112 | Unclassified | chr3:58478870-58498310    | 17.441  |
| Oma1          | 0 | 0 | 0 | 312  | 5.2      | 4.18931  | 51.41531 | Stalled      | chr4:102984450-103039033  | 52.584  |
| V1r18         | 0 | 0 | 0 | 1    | 0.016667 | 0        | 0        | Unclassified | chr13:22236389-22239394   | 1.006   |
| Tspan8        | 0 | 0 | 0 | 18   | 0.3      | 0.360298 | 1.386113 | Unclassified | chr10:115252339-115286949 | 32.611  |
| V1r11         | 0 | 0 | 0 | 0    | 0        | 0.028386 | 0        | Unclassified | chr13:22279014-22281917   | 0.904   |
| Lrrc3         | 0 | 0 | 0 | 16   | 0.266667 | 0.214799 | 1.325086 | Unclassified | chr10:77360319-77367281   | 4.963   |
| V1rg1         | 0 | 0 | 0 | 0    | 0        | 0.027831 | 0        | Unclassified | chr7:12254947-12257868    | 0.922   |
| Apis3         | 0 | 0 | 0 | 831  | 13.85    | 5.00379  | 15.45411 | Unclassified | chr1:79603450-79670547    | 65.098  |
| Cytsb         | 0 | 0 | 0 | 187  | 3.116667 | 0.384896 | 4.089647 | Unclassified | chr11:61888598-62036515   | 145.918 |
| Rras2         | 0 | 0 | 0 | 717  | 11.95    | 11.6198  | 12.18336 | Unclassified | chr7:121190295-121263295  | 71.001  |
| 1500001M20Rik | 0 | 0 | 0 | 385  | 6.416667 | 14.5222  | 13.58191 | Unclassified | chr6:114954398-114989892  | 33.495  |
| Med27         | 0 | 0 | 0 | 1790 | 29.83333 | 16.6518  | 10.51049 | Unclassified | chr2:29200355-29380308    | 177.954 |
| Bprm1         | 0 | 0 | 0 | 1447 | 24.11667 | 6.36796  | 55.30372 | Unclassified | chr14:31830323-31934778   | 102.456 |
| Acsm5         | 0 | 0 | 0 | 11   | 0.183333 | 0.02058  | 0.616814 | Unclassified | chr7:126667778-126686874  | 17.097  |
| Igf2bp2       | 0 | 0 | 0 | 183  | 3.05     | 0.40422  | 0.363331 | Unclassified | chr16:22059081-22165372   | 104.292 |
| Atp10b        | 0 | 0 | 0 | 138  | 2.3      | 0.068646 | 0        | Unclassified | chr11:42961378-43075787   | 112.41  |
| Crygf         | 0 | 0 | 0 | 2    | 0.033333 | 0        | 2        | Unclassified | chr1:65971095-65974878    | 1.784   |
| Cryge         | 0 | 0 | 0 | 4    | 0.066667 | 0.019916 | 1.233129 | Unclassified | chr1:65095130-65099737    | 2.608   |
| Crygb         | 0 | 0 | 0 | 1    | 0.016667 | 0        | 0        | Unclassified | chr1:65126800-65130841    | 2.042   |
| Trmt6         | 0 | 0 | 0 | 519  | 8.65     | 10.8054  | 16.11746 | Unclassified | chr2:132629950-132643790  | 11.841  |
| Crygc         | 0 | 0 | 0 | 3    | 0.05     | 0        | 0        | Unclassified | chr1:65118105-65122095    | 1.991   |
| Crybb2        | 0 | 0 | 0 | 12   | 0.2      | 0        | 1.085871 | Unclassified | chr5:113487284-113499786  | 10.503  |
| Crybb3        | 0 | 0 | 0 | 9    | 0.15     | 0.152374 | 0.973938 | Unclassified | chr5:113504859-113512604  | 5.746   |
| Rarb          | 0 | 0 | 0 | 211  | 3.516667 | 0.041581 | 0.81607  | Unclassified | chr14:17263353-17409724   | 144.372 |
| Zfp609        | 0 | 0 | 0 | 820  | 13.66667 | 2.78802  | 11.03855 | Unclassified | chr9:65539389-65677371    | 135.983 |



|               |   |   |   |      |          |          |          |              |                           |          |
|---------------|---|---|---|------|----------|----------|----------|--------------|---------------------------|----------|
| Olf1000       | 0 | 0 | 0 | 1    | 0.016667 | 0.040687 | 0        | Unclassified | chr2:85448120-85451065    | 0.946    |
| Sh3rf2        | 0 | 0 | 0 | 90   | 1.5      | 0.07108  | 0.541636 | Unclassified | chr18:42211363-42318349   | 104.987  |
| Speer3        | 0 | 0 | 0 | 3    | 0.05     | 0        | 0.677523 | Unclassified | chr5:13789618-13796819    | 5.202    |
| Spats1        | 0 | 0 | 0 | 87   | 1.45     | 0.961224 | 7.441103 | Unclassified | chr17:45585885-45613887   | 26.003   |
| Zfp385b       | 0 | 0 | 0 | 268  | 4.466667 | 0.095161 | 0        | Unclassified | chr2:77248688-77656873    | 406.186  |
| Stk32a        | 0 | 0 | 0 | 86   | 1.433333 | 0.023829 | 2.280796 | Unclassified | chr18:43365350-43477135   | 109.786  |
| Gm839         | 0 | 0 | 0 | 3    | 0.05     | 0.106095 | 0        | Unclassified | chr6:89162239-89168073    | 3.835    |
| C1ql4         | 0 | 0 | 0 | 43   | 0.716667 | 0.857997 | 0.380351 | Unclassified | chr15:98915184-98920159   | 2.976    |
| Maob          | 0 | 0 | 0 | 26   | 0.433333 | 0.021263 | 0        | Unclassified | chrX:16286407-16396492    | 108.086  |
| Anks3         | 0 | 0 | 0 | 685  | 11.41667 | 7.55476  | 10.41606 | Unclassified | chr16:4941419-4966330     | 22.912   |
| Rtf1          | 0 | 0 | 0 | 688  | 11.46667 | 9.3121   | 20.2443  | Unclassified | chr2:119498803-119561142  | 60.34    |
| Dpcc1         | 0 | 0 | 0 | 12   | 0.2      | 0.776449 | 0        | Unclassified | chr17:35772699-35782640   | 7.942    |
| AI836003      | 0 | 0 | 0 | 9    | 0.15     | 0.693064 | 2.283262 | Unclassified | chr15:97996236-98000565   | 2.33     |
| Atg2b         | 0 | 0 | 0 | 1020 | 17       | 5.55865  | 16.54282 | Unclassified | chr12:106851748-106925451 | 71.704   |
| Prmt2         | 0 | 0 | 0 | 129  | 2.15     | 3.21451  | 32.64643 | Stalled      | chr10:75669966-75702610   | 30.645   |
| Hoxa2         | 0 | 0 | 0 | 5    | 0.083333 | 0.266848 | 0.305877 | Unclassified | chr6:52112509-52116830    | 2.322    |
| B63005N14Rik  | 0 | 0 | 0 | 469  | 7.816667 | 2.89037  | 39.10894 | Stalled      | chr6:13575674-13629966    | 52.293   |
| Zc3h18        | 0 | 0 | 0 | 1357 | 22.61667 | 26.8477  | 11.11083 | Unclassified | chr8:124898515-124941260  | 40.746   |
| Hr            | 0 | 0 | 0 | 55   | 0.916667 | 0.128543 | 0.860067 | Unclassified | chr14:70951862-70973349   | 19.488   |
| Agfg1         | 0 | 0 | 0 | 918  | 15.3     | 21.1592  | 12.94014 | Unclassified | chr1:82834057-82892850    | 56.794   |
| Hrh1          | 0 | 0 | 0 | 102  | 1.7      | 0.013555 | 0        | Unclassified | chr6:114345929-114433290  | 85.362   |
| Icosl         | 0 | 0 | 0 | 107  | 1.783333 | 1.49684  | 8.34655  | Unclassified | chr10:77530112-77542270   | 10.159   |
| Dkkl1         | 0 | 0 | 0 | 47   | 0.783333 | 4.51721  | 8.254835 | Unclassified | chr7:52462895-52469253    | 4.359    |
| Trim47        | 0 | 0 | 0 | 22   | 0.366667 | 0.506708 | 1.260664 | Unclassified | chr11:115967139-115973330 | 4.192    |
| Tmem150b      | 0 | 0 | 0 | 30   | 0.5      | 0.639842 | 0.802423 | Unclassified | chr7:4658433-4678853      | 18.421   |
| Mcm8          | 0 | 0 | 0 | 429  | 7.15     | 3.17343  | 58.94539 | Stalled      | chr2:132640070-132669924  | 27.855   |
| Fbf1          | 0 | 0 | 0 | 257  | 4.283333 | 4.49997  | 9.637824 | Unclassified | chr11:116003598-116031492 | 25.895   |
| Nlrp9b        | 0 | 0 | 0 | 26   | 0.433333 | 0.017242 | 0.683211 | Unclassified | chr7:20591371-20648287    | 54.917   |
| Btbd7         | 0 | 0 | 0 | 521  | 8.683333 | 2.53861  | 22.76391 | Stalled      | chr12:104022857-104118616 | 93.76    |
| Sdsl          | 0 | 0 | 0 | 26   | 0.433333 | 0        | 1.112846 | Unclassified | chr5:120908210-120924772  | 14.563   |
| Olf1944       | 0 | 0 | 0 | 2    | 0.033333 | 0.027353 | 0        | Unclassified | chr9:39022943-39025879    | 0.937    |
| Mboat4        | 0 | 0 | 0 | 21   | 0.35     | 0.870954 | 0        | Unclassified | chr8:35176083-35188239    | 10.157   |
| Mapksp1       | 0 | 0 | 0 | 280  | 4.666667 | 10.0451  | 11.1059  | Unclassified | chr3:137579518-137591726  | 10.209   |
| Zfp518b       | 0 | 0 | 0 | 169  | 2.816667 | 0.551422 | 7.250612 | Unclassified | chr5:39059718-39077989    | 16.272   |
| Speer4e       | 0 | 0 | 0 | 2    | 0.033333 | 0        | 0.793644 | Unclassified | chr5:14933630-14940475    | 4.846    |
| Gaintl5       | 0 | 0 | 0 | 37   | 0.616667 | 0.048091 | 1.083239 | Unclassified | chr5:24685297-24726107    | 38.811   |
| Mlycd         | 0 | 0 | 0 | 451  | 7.516667 | 6.04063  | 20.16083 | Unclassified | chr8:121916791-121934988  | 16.198   |
| Mmgt2         | 0 | 0 | 0 | 259  | 4.316667 | 5.05635  | 8.510044 | Unclassified | chr11:62460165-62479861   | 17.697   |
| Crn           | 0 | 0 | 0 | 4    | 0.066667 | 0.023617 | 0        | Unclassified | chr3:92946708-92953393    | 4.686    |
| Stac          | 0 | 0 | 0 | 116  | 1.933333 | 0.056056 | 1.598739 | Unclassified | chr9:111463937-111594720  | 128.784  |
| Rc3h2         | 0 | 0 | 0 | 614  | 10.23333 | 0.864866 | 37.49008 | Unclassified | chr2:37225590-37280423    | 52.834   |
| St8sia6       | 0 | 0 | 0 | 736  | 12.26667 | 5.46813  | 27.41631 | Stalled      | chr2:13576564-13717147    | 138.584  |
| Zfp503        | 0 | 0 | 0 | 17   | 0.283333 | 0.547037 | 0.557779 | Unclassified | chr14:22803183-22810823   | 5.641    |
| Dgkb          | 0 | 0 | 0 | 282  | 4.7      | 0.030053 | 0        | Unclassified | chr12:38605291-39359997   | 752.707  |
| 4932435O22Rik | 0 | 0 | 0 | 124  | 2.066667 | 0.075346 | 0.443299 | Unclassified | chr11:114274718-114312174 | 35.457   |
| Gkn3          | 0 | 0 | 0 | 11   | 0.183333 | 0.242427 | 0.73197  | Unclassified | chr6:87333312-87340929    | 5.618    |
| Fam168b       | 0 | 0 | 0 | 1157 | 19.28333 | 29.9847  | 7.818943 | Unclassified | chr1:34870063-34901895    | 29.833   |
| Dennd4c       | 0 | 0 | 0 | 326  | 5.433333 | 2.87675  | 18.72308 | Stalled      | chr4:86392458-86476071    | 81.614   |
| Gpr158        | 0 | 0 | 0 | 179  | 2.983333 | 0.0341   | 0.725265 | Unclassified | chr2:21287193-21752169    | 462.977  |
| Exoc1         | 0 | 0 | 0 | 455  | 7.583333 | 6.71718  | 8.628235 | Unclassified | chr5:76956347-76999310    | 40.964   |
| Rnf113a1      | 0 | 0 | 0 | 110  | 1.833333 | 13.8447  | 10.25979 | Unclassified | chrX:34729337-34732460    | 1.124    |
| Areg          | 0 | 0 | 0 | 14   | 0.233333 | 0.171027 | 1.977116 | Unclassified | chr5:91566640-91577458    | 8.819    |
| Elf1          | 0 | 0 | 0 | 3040 | 50.66667 | 15.423   | 16.51782 | Unclassified | chr14:79879000-79982283   | 101.284  |
| Olf1675       | 0 | 0 | 0 | 0    | 0        | 0        | 0        | Unclassified | chr7:112172538-112175480  | 0.943    |
| Otud4         | 0 | 0 | 0 | 978  | 16.3     | 7.53783  | 16.28192 | Unclassified | chr8:82161574-82201654    | 38.081   |
| Gm9733        | 0 | 0 | 0 | 16   | 0.266667 | 0.082954 | 0        | Unclassified | chr3:15296550-15334302    | 35.753   |
| Lcn6          | 0 | 0 | 0 | 15   | 0.25     | 0        | 0.51582  | Unclassified | chr2:25530305-25537127    | 4.823    |
| Rax           | 0 | 0 | 0 | 14   | 0.233333 | 0.944309 | 0.554449 | Unclassified | chr18:66094292-66100743   | 4.452    |
| Nipa2         | 0 | 0 | 0 | 537  | 8.95     | 8.67399  | 30.19954 | Unclassified | chr7:63186956-63219820    | 30.865   |
| Camkk2        | 0 | 0 | 0 | 539  | 8.983333 | 7.68225  | 0.954426 | Unclassified | chr5:123183206-123216303  | 31.098   |
| Ddx50         | 0 | 0 | 0 | 832  | 13.86667 | 13.2495  | 36.78182 | Unclassified | chr10:62078770-62115946   | 35.177   |
| Hormad2       | 0 | 0 | 0 | 81   | 1.35     | 0.085888 | 1.085124 | Unclassified | chr11:4246385-4343085     | 94.701   |
| Spock2        | 0 | 0 | 0 | 144  | 2.4      | 1.33547  | 1.624849 | Unclassified | chr10:59567004-59596661   | 27.658   |
| Lrp1b         | 0 | 0 | 0 | 745  | 12.41667 | 0.03301  | 0.734794 | Unclassified | chr2:40452292-42511118    | 2056.827 |
| Col4a6        | 0 | 0 | 0 | 87   | 1.45     | 0.046268 | 0.781546 | Unclassified | chrX:137599945-137910619  | 308.675  |
| Opalin        | 0 | 0 | 0 | 29   | 0.483333 | 0        | 0.328079 | Unclassified | chr19:41137909-41153603   | 13.695   |
| Senp2         | 0 | 0 | 0 | 594  | 9.9      | 6.65603  | 13.67062 | Unclassified | chr16:22007556-22049341   | 39.786   |
| Hsd17b11      | 0 | 0 | 0 | 128  | 2.133333 | 6.08652  | 8.646202 | Unclassified | chr5:104418783-104452815  | 32.033   |
| Krtap5-5      | 0 | 0 | 0 | 6    | 0.1      | 0.008958 | 0.11202  | Unclassified | chr7:149414699-149417876  | 1.178    |
| Igsf1         | 0 | 0 | 0 | 3    | 0.05     | 0.073231 | 0        | Unclassified | chrX:47135715-47152922    | 15.208   |
| Prss28        | 0 | 0 | 0 | 4    | 0.066667 | 0.04308  | 0        | Unclassified | chr17:25443590-25448821   | 3.232    |
| Prss29        | 0 | 0 | 0 | 10   | 0.166667 | 0.108521 | 0        | Unclassified | chr17:25453598-25459629   | 4.032    |
| Impa2         | 0 | 0 | 0 | 591  | 9.85     | 17.8526  | 10.7995  | Unclassified | chr18:67446876-67478495   | 29.62    |
| Il1rapl2      | 0 | 0 | 0 | 247  | 4.116667 | 0.020323 | 0        | Unclassified | chrX:134104087-135381494  | 1275.408 |
| Donson        | 0 | 0 | 0 | 573  | 9.55     | 6.35943  | 10.07487 | Unclassified | chr16:91679509-91699073   | 9.465    |
| Cldn15        | 0 | 0 | 0 | 116  | 1.933333 | 0.062485 | 3.488124 | Unclassified | chr5:137441738-137451710  | 7.973    |
| Ms4a4b        | 0 | 0 | 0 | 16   | 0.266667 | 0.218785 | 0        | Unclassified | chr19:11516047-11538038   | 19.992   |
| Foxl1         | 0 | 0 | 0 | 8    | 0.133333 | 0.154595 | 0        | Unclassified | chr8:123649584-123654544  | 2.961    |
| Dmtf1         | 0 | 0 | 0 | 1344 | 22.4     | 4.88827  | 16.8543  | Unclassified | chr5:9118867-9163776      | 42.91    |
| Slc15a2       | 0 | 0 | 0 | 92   | 1.533333 | 0.735651 | 0        | Unclassified | chr16:36750249-36787048   | 34.8     |
| Rhox4b        | 0 | 0 | 0 | 0    | 0        | 0        | 0        | Unclassified | chrX:34845000-34851785    | 4.786    |
| Rars          | 0 | 0 | 0 | 706  | 11.76667 | 31.4944  | 9.159507 | Unclassified | chr11:35621883-35650030   | 26.148   |
| Dlg2          | 0 | 0 | 0 | 608  | 10.13333 | 0.049484 | 2.076125 | Unclassified | chr7:98237295-99597599    | 1358.305 |
| Lingo1        | 0 | 0 | 0 | 126  | 2.1      | 0.151696 | 0.350304 | Unclassified | chr9:56466281-56535060    | 66.78    |
| Slc35f2       | 0 | 0 | 0 | 373  | 6.216667 | 4.52595  | 17.30767 | Unclassified | chr9:53617341-53665968    | 46.628   |
| Armcx5        | 0 | 0 | 0 | 132  | 2.2      | 0        | 12.75962 | Stalled      | chrX:132275230-132281865  | 4.636    |

|               |   |   |   |      |          |          |          |              |                           |         |
|---------------|---|---|---|------|----------|----------|----------|--------------|---------------------------|---------|
| Plxnb3        | 0 | 0 | 0 | 55   | 0.916667 | 0.026601 | 0.21063  | Unclassified | chrX:71000441-71017849    | 15.409  |
| Glr2          | 0 | 0 | 0 | 160  | 2.666667 | 3.90749  | 16.27371 | Stalled      | chr1:145584697-145596808  | 10.112  |
| Cypt3         | 0 | 0 | 0 | 0    | 0        | 0.038488 | 0        | Unclassified | chrX:149991135-149993972  | 0.838   |
| D19Erdt386e   | 0 | 0 | 0 | 562  | 9.366667 | 3.67453  | 25.90674 | Unclassified | chr19:42591294-42666746   | 73.453  |
| 1700017D01Rik | 0 | 0 | 0 | 48   | 0.8      | 0.107339 | 0.41297  | Unclassified | chr19:11171305-11207368   | 34.064  |
| Nus1          | 0 | 0 | 0 | 530  | 8.833333 | 14.3648  | 13.98484 | Unclassified | chr10:521325352-52159996  | 22.645  |
| Cnksr3        | 0 | 0 | 0 | 252  | 4.2      | 2.3377   | 9.615438 | Unclassified | chr10:3132303-3227479     | 93.177  |
| D11Wsu47e     | 0 | 0 | 0 | 501  | 8.35     | 10.66    | 22.80202 | Unclassified | chr11:113543725-113555961 | 10.237  |
| Eomes         | 0 | 0 | 0 | 11   | 0.183333 | 0.490449 | 0.464668 | Unclassified | chr9:118385306-118395249  | 7.944   |
| V1re9         | 0 | 0 | 0 | 0    | 0        | 0.022182 | 0        | Unclassified | chr7:11165104-11168836    | 1.733   |
| Sic6a8        | 0 | 0 | 0 | 110  | 1.833333 | 0.602955 | 0.714673 | Unclassified | chrX:70916471-70927837    | 9.367   |
| Dact2         | 0 | 0 | 0 | 11   | 0.183333 | 0.018257 | 0.97449  | Unclassified | chr17:14332237-14342838   | 8.602   |
| Nsun6         | 0 | 0 | 0 | 239  | 3.983333 | 6.75976  | 50.2449  | Stalled      | chr2:14916759-14972939    | 54.181  |
| Errfi1        | 0 | 0 | 0 | 205  | 3.416667 | 0.844843 | 49.65564 | Stalled      | chr4:150227199-150242989  | 13.791  |
| Sic35f5       | 0 | 0 | 0 | 238  | 3.966667 | 3.26179  | 14.97412 | Stalled      | chr1:127455592-127492261  | 34.67   |
| Gga2          | 0 | 0 | 0 | 826  | 13.76667 | 21.8585  | 10.38558 | Unclassified | chr7:129130235-129166712  | 34.478  |
| Art3          | 0 | 0 | 0 | 414  | 6.9      | 1.38554  | 0        | Unclassified | chr5:92758866-92843653    | 82.788  |
| Bdp1          | 0 | 0 | 0 | 1013 | 16.88333 | 4.34747  | 14.11776 | Unclassified | chr13:100787948-100876025 | 86.078  |
| Nebi          | 0 | 0 | 0 | 285  | 4.75     | 0.146227 | 1.157527 | Unclassified | chr2:17268360-17654695    | 384.336 |
| Pank2         | 0 | 0 | 0 | 730  | 12.16667 | 6.71759  | 32.5554  | Unclassified | chr2:131086235-131124923  | 36.689  |
| Tmem30a       | 0 | 0 | 0 | 394  | 6.566667 | 10.6481  | 44.17764 | Stalled      | chr9:79616750-79643237    | 24.488  |
| Ankrd10       | 0 | 0 | 0 | 1351 | 22.51667 | 19.01    | 14.74883 | Unclassified | chr8:11611582-11637754    | 24.173  |
| Zbtb39        | 0 | 0 | 0 | 169  | 2.816667 | 1.62185  | 5.525469 | Unclassified | chr10:127174593-127184395 | 7.803   |
| Fbxw16        | 0 | 0 | 0 | 8    | 0.133333 | 0.018709 | 0.693305 | Unclassified | chr9:109334831-109353654  | 16.824  |
| Fbxw21        | 0 | 0 | 0 | 10   | 0.166667 | 0.086247 | 0.705594 | Unclassified | chr9:109041967-109066536  | 22.57   |
| Cknk2         | 0 | 0 | 0 | 121  | 2.016667 | 0.041481 | 0.536196 | Unclassified | chr1:191031810-191170071  | 136.262 |
| Gm10375       | 0 | 0 | 0 | 1    | 0.016667 | 0        | 0        | Unclassified | chr14:44180291-44187678   | 5.388   |
| Gm1968        | 0 | 0 | 0 | 40   | 0.666667 | 0.052205 | 0.386961 | Unclassified | chr16:29958012-29981210   | 21.199  |
| Kdm1b         | 0 | 0 | 0 | 545  | 9.083333 | 3.73897  | 16.3242  | Unclassified | chr13:47136907-47179982   | 41.076  |
| Rnf144b       | 0 | 0 | 0 | 147  | 2.45     | 0.263663 | 1.405416 | Unclassified | chr13:47216088-47343360   | 125.273 |
| Nup153        | 0 | 0 | 0 | 1269 | 21.15    | 10.3519  | 16.48525 | Unclassified | chr13:46775270-46825218   | 47.949  |
| Agmat         | 0 | 0 | 0 | 47   | 0.783333 | 0.027385 | 0.208491 | Unclassified | chr4:141300589-141315178  | 12.59   |
| Serp1b7       | 0 | 0 | 0 | 39   | 0.65     | 0.122319 | 0.439402 | Unclassified | chr1:109317265-109349265  | 30.001  |
| Mcf2d         | 0 | 0 | 0 | 281  | 4.683333 | 9.02823  | 19.72444 | Unclassified | chr17:87653782-87667220   | 11.439  |
| Lgtn          | 0 | 0 | 0 | 360  | 6        | 16.2025  | 15.1711  | Unclassified | chr1:133047783-133070048  | 20.266  |
| Brc3          | 0 | 0 | 0 | 403  | 6.716667 | 11.1806  | 69.37767 | Stalled      | chrX:72659966-72699339    | 37.374  |
| Lhcgr         | 0 | 0 | 0 | 47   | 0.783333 | 0.025101 | 3.316307 | Unclassified | chr17:89140888-89193316   | 50.429  |
| 1700008F21Rik | 0 | 0 | 0 | 45   | 0.75     | 0        | 0        | Unclassified | chr8:131589033-131707631  | 116.599 |
| E130311K13Rik | 0 | 0 | 0 | 156  | 2.6      | 1.89579  | 30.14093 | Stalled      | chr3:63718617-63735307    | 14.691  |
| Bmp4          | 0 | 0 | 0 | 12   | 0.2      | 0.154336 | 0.863636 | Unclassified | chr14:47003195-47012274   | 7.08    |
| Bmp10         | 0 | 0 | 0 | 10   | 0.166667 | 0.06812  | 0.333925 | Unclassified | chr6:87376995-87384506    | 5.512   |
| Bmp15         | 0 | 0 | 0 | 1    | 0.016667 | 0.012553 | 0        | Unclassified | chrX:5891223-5899841      | 6.619   |
| Bmp2          | 0 | 0 | 0 | 6    | 0.1      | 0.066247 | 2.438623 | Unclassified | chr2:133376934-133388621  | 9.688   |
| Dnajc5        | 0 | 0 | 0 | 962  | 16.03333 | 23.1523  | 23.51263 | Unclassified | chr2:181253209-181286954  | 31.746  |
| Yes1          | 0 | 0 | 0 | 187  | 3.116667 | 1.03939  | 57.25961 | Stalled      | chr5:32911605-32989430    | 75.826  |
| Fkbp10        | 0 | 0 | 0 | 64   | 1.066667 | 0.128065 | 0.232284 | Unclassified | chr11:100275007-100286153 | 9.147   |
| Bmp1          | 0 | 0 | 0 | 127  | 2.116667 | 1.07827  | 6.914678 | Unclassified | chr14:70874361-70922067   | 45.707  |
| Cwc15         | 0 | 0 | 0 | 375  | 6.25     | 54.6714  | 14.01239 | Unclassified | chr9:14303062-14315064    | 10.003  |
| D830030K20Rik | 0 | 0 | 0 | 0    | 0        | 0        | 0        | Unclassified | chr14:3222445-3234345     | 9.901   |
| Olfr867       | 0 | 0 | 0 | 1    | 0.016667 | 0.051471 | 1        | Unclassified | chr9:19858909-19861905    | 0.997   |
| Tarm1         | 0 | 0 | 0 | 12   | 0.2      | 0.280864 | 0.555121 | Unclassified | chr7:3489956-3505433      | 13.478  |
| Hat1          | 0 | 0 | 0 | 536  | 8.933333 | 19.4563  | 20.70109 | Unclassified | chr2:71225316-71279679    | 52.364  |
| Fbxo7         | 0 | 0 | 0 | 365  | 6.083333 | 5.89756  | 19.3214  | Unclassified | chr10:85482673-85511073   | 26.401  |
| Olfr308       | 0 | 0 | 0 | 0    | 0        | 0        | 0        | Unclassified | chr7:93469533-93472460    | 0.928   |
| Enpp6         | 0 | 0 | 0 | 183  | 3.05     | 1.65146  | 2.646212 | Unclassified | chr8:48070278-48180249    | 107.972 |
| Taf6          | 0 | 0 | 0 | 476  | 7.933333 | 19.6387  | 3.939474 | Unclassified | chr5:138619844-138630414  | 8.571   |
| Snord87       | 0 | 0 | 0 | 286  | 4.766667 | 3.98345  | 146      | Unclassified | chr1:9932550-9934624      | 0.075   |
| Pms2          | 0 | 0 | 0 | 754  | 12.56667 | 5.01209  | 27.43125 | Unclassified | chr5:144668869-144692625  | 21.757  |
| Arl4c         | 0 | 0 | 0 | 174  | 2.9      | 4.31872  | 6.644077 | Unclassified | chr1:90594802-90600766    | 3.965   |
| Prss39        | 0 | 0 | 0 | 17   | 0.283333 | 0.123407 | 0.436936 | Unclassified | chr1:34553274-34559907    | 4.634   |
| Prss40        | 0 | 0 | 0 | 14   | 0.233333 | 0.068988 | 0.975213 | Unclassified | chr1:34609176-34619788    | 8.613   |
| Asns          | 0 | 0 | 0 | 212  | 3.533333 | 11.8438  | 14.58098 | Stalled      | chr6:7625170-7645182      | 18.013  |
| Tes           | 0 | 0 | 0 | 395  | 6.583333 | 14.2316  | 14.91168 | Unclassified | chr6:17013148-17055825    | 40.678  |
| Sifn1         | 0 | 0 | 0 | 72   | 1.2      | 0.021821 | 0.608166 | Unclassified | chr4:120202835-120209266  | 4.432   |
| Sh2d1b1       | 0 | 0 | 0 | 10   | 0.166667 | 0.31713  | 4.969052 | Unclassified | chr1:172205454-172215793  | 8.34    |
| Eif2s3x       | 0 | 0 | 0 | 489  | 8.15     | 16.1174  | 19.36907 | Unclassified | chrX:91434047-91459990    | 23.944  |
| Olfr12        | 0 | 0 | 0 | 2    | 0.033333 | 0.057513 | 1        | Unclassified | chr1:94514484-94517486    | 1.003   |
| Ddx3y         | 0 | 0 | 0 | 292  | 4.866667 | 5.96899  | 13.02539 | Unclassified | chrY:597157-625056        | 25.9    |
| Deb1          | 0 | 0 | 0 | 95   | 1.583333 | 12.1959  | 8.127013 | Unclassified | chr9:121617506-121622039  | 2.534   |
| Snx25         | 0 | 0 | 0 | 541  | 9.016667 | 9.80871  | 1.169466 | Unclassified | chr8:47118615-47211500    | 90.886  |
| Eif2s3y       | 0 | 0 | 0 | 174  | 2.9      | 20.5048  | 20.87593 | Stalled      | chrY:345054-365037        | 17.984  |
| Exo1          | 0 | 0 | 0 | 654  | 10.9     | 4.19601  | 9.531965 | Unclassified | chr1:177808908-177841527  | 30.62   |
| Tmem188       | 0 | 0 | 0 | 285  | 4.75     | 5.66661  | 15.49864 | Unclassified | chr8:90640657-90659096    | 16.44   |
| Btbd6         | 0 | 0 | 0 | 293  | 4.883333 | 5.41904  | 2.965196 | Elongating   | chr12:114212692-114217146 | 2.455   |
| 4933408B17Rik | 0 | 0 | 0 | 97   | 1.616667 | 0.244172 | 4.775365 | Unclassified | chr18:34739499-34759122   | 17.624  |
| Dtx3          | 0 | 0 | 0 | 154  | 2.566667 | 21.9054  | 5.691904 | Unclassified | chr10:126627433-126634765 | 5.333   |
| Kcnp2         | 0 | 0 | 0 | 66   | 1.1      | 0        | 1.406468 | Unclassified | chr19:45868159-45892293   | 22.135  |
| Lactb         | 0 | 0 | 0 | 168  | 2.8      | 10.2908  | 23.39174 | Stalled      | chr9:66803199-66825291    | 20.093  |
| Cxcr6         | 0 | 0 | 0 | 45   | 0.75     | 0        | 0.310981 | Unclassified | chr9:123713594-123720872  | 5.279   |
| Zfp202        | 0 | 0 | 0 | 267  | 4.45     | 0.59494  | 19.81075 | Stalled      | chr9:39997900-40021189    | 21.29   |
| Fgf16         | 0 | 0 | 0 | 20   | 0.333333 | 0.223325 | 4.200788 | Unclassified | chrX:102957815-102971871  | 12.057  |
| Wfdc6b        | 0 | 0 | 0 | 6    | 0.1      | 0.023833 | 0        | Unclassified | chr2:164437199-164443712  | 4.514   |
| Dysfip1       | 0 | 0 | 0 | 49   | 0.816667 | 2.16591  | 0.29512  | Unclassified | chr11:120411288-120414446 | 1.159   |
| Rabl2a        | 0 | 0 | 0 | 113  | 1.883333 | 2.1486   | 14.18645 | Stalled      | chr15:89412957-89424354   | 9.398   |
| Cilp2         | 0 | 0 | 0 | 47   | 0.783333 | 0.28679  | 3.530247 | Unclassified | chr8:72404264-72413291    | 7.028   |
| BC100530      | 0 | 0 | 0 | 4    | 0.066667 | 0        | 0        | Unclassified | chr16:36359467-36369656   | 8.19    |

|               |   |        |   |      |          |          |          |              |                           |         |
|---------------|---|--------|---|------|----------|----------|----------|--------------|---------------------------|---------|
| 38786         | 0 | 0      | 0 | 77   | 1.283333 | 0.082846 | 1.153638 | Unclassified | chr15:26236826-26339328   | 100.503 |
| Slc22a20      | 0 | 0      | 0 | 42   | 0.7      | 0        | 1.829159 | Unclassified | chr19:5970233-5988143     | 15.911  |
| Olfr419       | 0 | 0      | 0 | 1    | 0.016667 | 0.023603 | 1        | Unclassified | chr1:176180021-176183107  | 1.087   |
| Naalad1       | 0 | 0      | 0 | 173  | 2.883333 | 0.452408 | 0.46437  | Unclassified | chr19:6103797-6115555     | 9.759   |
| Hnf4a         | 0 | 0      | 0 | 33   | 0.55     | 0.091167 | 0.451764 | Unclassified | chr2:163370923-163398643  | 25.721  |
| Srfbp1        | 0 | 0      | 0 | 544  | 9.066667 | 10.7379  | 9.702033 | Unclassified | chr18:52623346-52650392   | 25.047  |
| Doxl2         | 0 | 0      | 0 | 7    | 0.116667 | 0.011203 | 0.394306 | Unclassified | chr6:48923141-48928744    | 3.604   |
| Tmem19        | 0 | 0      | 0 | 347  | 5.783333 | 6.14562  | 45.16164 | Stalled      | chr10:114777795-114801318 | 21.524  |
| Zfp775        | 0 | 0      | 0 | 75   | 1.25     | 2.86499  | 0.664889 | Unclassified | chr6:48561178-48573226    | 10.049  |
| Gng4          | 0 | 0      | 0 | 128  | 2.133333 | 0.082045 | 13.68178 | Stalled      | chr13:13874805-13920162   | 43.358  |
| Odf1          | 0 | 0      | 0 | 17   | 0.283333 | 0.023197 | 0.705083 | Unclassified | chr15:38146957-38156490   | 7.534   |
| Olfr307       | 0 | 0      | 0 | 2    | 0.033333 | 0        | 2        | Unclassified | chr7:93483962-93486904    | 0.943   |
| Fxyd4         | 0 | 0      | 0 | 67   | 1.116667 | 0.069403 | 0.482869 | Unclassified | chr6:117883576-117889353  | 3.778   |
| Ttll13        | 0 | 0      | 0 | 131  | 2.183333 | 0.944902 | 11.11222 | Stalled      | chr7:87389261-87405707    | 14.447  |
| Api2          | 0 | 0      | 0 | 300  | 5        | 0.541171 | 130.1591 | Stalled      | chrX:160345091-160367478  | 20.388  |
| Slc35b4       | 0 | 0      | 0 | 200  | 3.333333 | 4.66548  | 13.53977 | Stalled      | chr6:34105878-34129054    | 21.177  |
| Dpm3          | 0 | 0      | 0 | 160  | 2.666667 | 83.5396  | 159      | Unclassified | chr3:89068473-89070999    | 0.527   |
| Caly          | 0 | 0      | 0 | 22   | 0.366667 | 0.131449 | 0.380361 | Unclassified | chr7:147255785-147270447  | 12.663  |
| Cgref1        | 0 | 0      | 0 | 20   | 0.333333 | 0.337018 | 0.931756 | Unclassified | chr5:31235515-31249853    | 12.339  |
| Stx6          | 0 | 0      | 0 | 616  | 10.26667 | 14.507   | 8.96359  | Unclassified | chr1:157003832-157050647  | 44.816  |
| Hmx1          | 0 | 0      | 0 | 5    | 0.083333 | 0.237969 | 1.738701 | Unclassified | chr5:35729765-35735521    | 3.757   |
| Cpb1          | 0 | 0      | 0 | 14   | 0.233333 | 0.068628 | 1.338296 | Unclassified | chr3:20149382-20176651    | 25.27   |
| Gjb2          | 0 | 0      | 0 | 11   | 0.183333 | 0.122619 | 1.838227 | Unclassified | chr14:57717438-57725539   | 6.102   |
| Ctrc          | 0 | 0      | 0 | 21   | 0.35     | 0        | 0.923965 | Unclassified | chr4:141394154-141404274  | 8.121   |
| Hmx3          | 0 | 0      | 0 | 14   | 0.233333 | 0.459378 | 0.974874 | Unclassified | chr7:138684476-138688445  | 1.97    |
| Sntg2         | 0 | 0      | 0 | 154  | 2.566667 | 0.098714 | 4.027514 | Unclassified | chr12:30859421-31060240   | 198.82  |
| Nap1i5        | 0 | 0      | 0 | 12   | 0.2      | 0.412775 | 2.782383 | Unclassified | chr6:58855226-58859120    | 1.895   |
| Olfr922       | 0 | 0      | 0 | 3    | 0.05     | 0.022644 | 2        | Unclassified | chr9:38620992-38624124    | 1.133   |
| Olfr715       | 0 | 0      | 0 | 1    | 0.016667 | 0.013487 | 1        | Unclassified | chr7:114271957-114274905  | 0.949   |
| Hmx2          | 0 | 0      | 0 | 17   | 0.283333 | 1.38946  | 2.023398 | Unclassified | chr7:138695575-138700096  | 2.522   |
| Olfr818       | 0 | 0      | 0 | 0    | 0        | 0.018901 | 0        | Unclassified | chr10:129382159-129385116 | 0.958   |
| Olfr821       | 0 | 0      | 0 | 1    | 0.016667 | 0        | 0        | Unclassified | chr10:129468683-129471616 | 0.934   |
| Olfr473       | 0 | 0      | 0 | 0    | 0        | 0.027441 | 0        | Unclassified | chr7:115075035-115077968  | 0.934   |
| Olfr472       | 0 | 0      | 0 | 1    | 0.016667 | 0        | 1        | Unclassified | chr7:115044232-115047165  | 0.934   |
| Kctd14        | 0 | 0      | 0 | 247  | 4.116667 | 6.51897  | 4.327281 | Unclassified | chr7:104599713-104608066  | 6.354   |
| Angptl3       | 0 | 0      | 0 | 10   | 0.166667 | 0.167795 | 1.413298 | Unclassified | chr4:98695645-98704879    | 7.235   |
| Foxs1         | 0 | 0      | 0 | 9    | 0.15     | 0.038832 | 1        | Unclassified | chr2:152757633-152760944  | 1.312   |
| Galnt1        | 0 | 0      | 0 | 112  | 1.866667 | 0.088276 | 0.888348 | Unclassified | chr12:81617976-81704883   | 84.908  |
| Olfr303       | 0 | 0      | 0 | 2    | 0.033333 | 0        | 0        | Unclassified | chr7:93543046-93546006    | 0.961   |
| Tbx5          | 0 | 0      | 0 | 68   | 1.133333 | 0.094219 | 0.432597 | Unclassified | chr5:120282671-120335227  | 50.557  |
| Olfr140       | 0 | 0      | 0 | 1    | 0.016667 | 0        | 0        | Unclassified | chr2:89891570-89894479    | 0.91    |
| Glrx3         | 0 | 0      | 0 | 520  | 8.666667 | 18.0355  | 9.778675 | Unclassified | chr7:144627330-144660277  | 30.948  |
| Nov           | 0 | 0      | 0 | 22   | 0.366667 | 0.146317 | 2.756743 | Unclassified | chr15:54575482-54585316   | 7.835   |
| Zfp521        | 0 | 0      | 0 | 311  | 5.183333 | 0.156362 | 6.357776 | Unclassified | chr18:13846723-14133046   | 284.324 |
| Sh2d4a        | 0 | 0      | 0 | 68   | 1.133333 | 0.101901 | 1.053898 | Unclassified | chr8:70798426-70871603    | 71.178  |
| Oraov1        | 0 | 0      | 0 | 212  | 3.533333 | 8.62642  | 7.1921   | Unclassified | chr7:152099098-152107042  | 5.945   |
| Hspb11        | 0 | 0      | 0 | 275  | 4.583333 | 3.30152  | 30.54175 | Stalled      | chr4:106924538-106952493  | 25.956  |
| Zdhhc9        | 0 | 0      | 0 | 172  | 2.866667 | 3.35457  | 22.4181  | Stalled      | chrX:45525147-45563879    | 36.733  |
| Iah1          | 0 | 0      | 0 | 364  | 6.066667 | 15.6257  | 11.74499 | Unclassified | chr12:21320252-21329468   | 7.217   |
| Pncr1         | 0 | 0      | 0 | 715  | 11.91667 | 17.0881  | 4.082461 | Unclassified | chr4:33332397-33337762    | 3.366   |
| Mustn1        | 0 | 0      | 0 | 95   | 1.583333 | 0.847899 | 2.485126 | Unclassified | chr14:31690442-31694796   | 2.355   |
| Nudt14        | 0 | 0      | 0 | 129  | 2.15     | 13.8498  | 16.05847 | Stalled      | chr12:114172943-114182329 | 7.387   |
| Olfr866       | 0 | 0      | 0 | 2    | 0.033333 | 0        | 0.072356 | Unclassified | chr9:19831402-19834479    | 1.078   |
| Olfr836       | 0 | 0      | 0 | 1    | 0.016667 | 0.026841 | 1        | Unclassified | chr9:18923400-18926355    | 0.956   |
| Olfr136       | 0 | 0      | 0 | 1    | 0.016667 | 0        | 1        | Unclassified | chr17:38470103-38473042   | 0.94    |
| Olfr830       | 0 | 0      | 0 | 0    | 0        | 0        | 0        | Unclassified | chr9:18677772-18680720    | 0.949   |
| Olfr837       | 0 | 0      | 0 | 1    | 0.016667 | 0        | 1        | Unclassified | chr9:18939371-18942411    | 1.041   |
| Olfr620       | 0 | 0      | 0 | 0    | 0        | 0        | 0        | Unclassified | chr7:110759925-110762865  | 0.941   |
| Tmem182       | 0 | 0      | 0 | 38   | 0.633333 | 0.046775 | 0.57481  | Unclassified | chr1:40860445-40912112    | 49.668  |
| S100a13       | 0 | 0      | 0 | 200  | 3.333333 | 34.4989  | 24.03496 | Stalled      | chr3:90316681-90328503    | 9.823   |
| Tfb2m         | 0 | 0      | 0 | 366  | 6.1      | 8.96282  | 15.63038 | Unclassified | chr1:181458186-181478398  | 18.213  |
| Ccdc160       | 0 | 0      | 0 | 4    | 0.066667 | 0.091784 | 0        | Unclassified | chrX:50142376-50152645    | 8.27    |
| Snx26         | 0 | 0      | 0 | 252  | 4.2      | 6.04001  | 5.723446 | Unclassified | chr7:31307244-31322028    | 12.785  |
| Lsm2          | 0 | 108.77 | 0 | 535  | 8.916667 | 62.7265  | 15.31826 | Unclassified | chr17:35116804-35122838   | 4.035   |
| H3f3a         | 0 | 0      | 0 | 1015 | 16.91667 | 30.6403  | 8.106984 | Unclassified | chr1:182732698-182745734  | 11.037  |
| Aldh1l1       | 0 | 0      | 0 | 98   | 1.633333 | 0.162074 | 1.710645 | Unclassified | chr6:90498841-90549165    | 48.325  |
| Cog1          | 0 | 0      | 0 | 614  | 10.23333 | 10.5567  | 6.105993 | Unclassified | chr11:113508842-113523715 | 12.874  |
| Fbxl3         | 0 | 0      | 0 | 620  | 10.33333 | 6.51995  | 15.31147 | Unclassified | chr14:103479455-103500726 | 19.272  |
| Fcf1          | 0 | 0      | 0 | 370  | 6.166667 | 17.2473  | 16.01364 | Unclassified | chr12:86309879-86324246   | 12.368  |
| Haus7         | 0 | 0      | 0 | 156  | 2.6      | 14.1718  | 17.8748  | Stalled      | chrX:70682653-70706368    | 21.716  |
| Angptl1       | 0 | 0      | 0 | 370  | 6.166667 | 0        | 1.55069  | Elongating   | chr1:158767153-158791209  | 22.057  |
| Ldhb          | 0 | 0      | 0 | 21   | 0.35     | 0.198608 | 2.553218 | Unclassified | chr6:142438768-142458463  | 17.696  |
| Dazap2        | 0 | 0      | 0 | 566  | 9.433333 | 42.865   | 7.614843 | Unclassified | chr15:100444092-100451192 | 5.101   |
| Asz1          | 0 | 0      | 0 | 35   | 0.583333 | 0        | 1.944369 | Unclassified | chr6:18000963-18061061    | 58.099  |
| Psmc4         | 0 | 0      | 0 | 343  | 5.716667 | 58.0672  | 3.290416 | Unclassified | chr7:28826720-28837111    | 8.392   |
| Prkra         | 0 | 0      | 0 | 59   | 0.983333 | 3.61965  | 14.84948 | Stalled      | chr2:76467993-76488051    | 18.059  |
| Gphb5         | 0 | 0      | 0 | 12   | 0.2      | 0.11117  | 0.269734 | Unclassified | chr12:76512706-76519768   | 5.063   |
| 4930521A18Rik | 0 | 0      | 0 | 1    | 0.016667 | 0.01769  | 0        | Unclassified | chr1:31277683-31281132    | 1.45    |
| S100a4        | 0 | 0      | 0 | 18   | 0.3      | 3.55151  | 1.387627 | Unclassified | chr3:90405691-90409966    | 2.276   |
| Slitrk1       | 0 | 0      | 0 | 3    | 0.05     | 0.039194 | 0.619193 | Unclassified | chr14:109309205-109315456 | 4.252   |
| 2610028H24Rik | 0 | 0      | 0 | 31   | 0.516667 | 0        | 0.92468  | Unclassified | chr10:75909825-75923963   | 12.139  |
| Phlda3        | 0 | 0      | 0 | 69   | 1.15     | 10.4457  | 6.128114 | Unclassified | chr1:137660661-137665710  | 3.05    |
| Hrasls        | 0 | 0      | 0 | 8    | 0.133333 | 0.008793 | 0        | Unclassified | chr16:29207780-29230616   | 20.837  |
| Ttc30b        | 0 | 0      | 0 | 25   | 0.416667 | 1.66665  | 5.749911 | Unclassified | chr2:75773906-75778519    | 2.614   |
| 4632433K11Rik | 0 | 0      | 0 | 175  | 2.916667 | 0.456255 | 0.597983 | Unclassified | chr7:4983679-4988370      | 2.692   |
| Scgb3a2       | 0 | 0      | 0 | 2    | 0.033333 | 0        | 1        | Unclassified | chr18:43921980-43927053   | 3.074   |

|                      |   |   |   |     |          |          |          |              |                           |         |
|----------------------|---|---|---|-----|----------|----------|----------|--------------|---------------------------|---------|
| <b>Chst1</b>         | 0 | 0 | 0 | 32  | 0.533333 | 1.0513   | 1.471363 | Unclassified | chr2:92437863-92455409    | 15.547  |
| <b>F830116E18Rik</b> | 0 | 0 | 0 | 2   | 0.033333 | 1.19788  | 2        | Unclassified | chr11:32184963-32187912   | 0.95    |
| <b>Oat</b>           | 0 | 0 | 0 | 801 | 13.35    | 24.7928  | 23.16067 | Unclassified | chr7:139749157-139770081  | 18.925  |
| <b>Sox21</b>         | 0 | 0 | 0 | 14  | 0.233333 | 0.216044 | 0.474059 | Unclassified | chr14:118632457-118638252 | 3.796   |
| <b>Slc24a2</b>       | 0 | 0 | 0 | 206 | 3.433333 | 0.03025  | 0.545873 | Unclassified | chr4:86629029-86878444    | 247.416 |
| <b>Krt75</b>         | 0 | 0 | 0 | 11  | 0.183333 | 0.041099 | 0.544497 | Unclassified | chr15:101393773-101406335 | 10.563  |
| <b>Gpr143</b>        | 0 | 0 | 0 | 10  | 0.166667 | 0.023288 | 1.572219 | Unclassified | chrX:149214463-149243189  | 26.727  |
| <b>Ano3</b>          | 0 | 0 | 0 | 115 | 1.916667 | 0.026103 | 0        | Unclassified | chr2:110498296-110792401  | 292.106 |
| <b>Phactr4</b>       | 0 | 0 | 0 | 520 | 8.666667 | 1.89552  | 24.34718 | Unclassified | chr4:131911838-131980361  | 66.524  |
| <b>Rps6ka5</b>       | 0 | 0 | 0 | 732 | 12.2     | 1.48633  | 49.36593 | Stalled      | chr12:101787987-101965238 | 175.252 |
| <b>Rasal2</b>        | 0 | 0 | 0 | 274 | 4.566667 | 0.34475  | 15.52239 | Stalled      | chr1:159065315-159344726  | 277.412 |
| <b>Shroom3</b>       | 0 | 0 | 0 | 379 | 6.316667 | 0.156457 | 1.71455  | Unclassified | chr5:93110460-93394785    | 282.326 |
| <b>Ftsj1</b>         | 0 | 0 | 0 | 127 | 2.116667 | 4.43046  | 10.59535 | Stalled      | chrX:7815793-7831532      | 13.74   |
| <b>Olfr492</b>       | 0 | 0 | 0 | 0   | 0        | 0.067811 | 0        | Unclassified | chr7:115466243-115469188  | 0.946   |
| <b>Rag2</b>          | 0 | 0 | 0 | 7   | 0.116667 | 0.049105 | 0.53059  | Unclassified | chr2:101462904-101472685  | 7.782   |
| <b>Rab34</b>         | 0 | 0 | 0 | 18  | 0.3      | 1.11535  | 5.805369 | Unclassified | chr11:7799928-78005695    | 3.768   |
| <b>Krt27</b>         | 0 | 0 | 0 | 6   | 0.1      | 0.028389 | 1.203187 | Unclassified | chr11:99206879-99214408   | 5.53    |
| <b>Nphs1</b>         | 0 | 0 | 0 | 42  | 0.7      | 0.043851 | 0.840633 | Unclassified | chr7:31243076-31273628    | 28.553  |
| <b>Rag1</b>          | 0 | 0 | 0 | 8   | 0.133333 | 0.06536  | 0.672775 | Unclassified | chr2:101478410-101491689  | 11.28   |
| <b>Krt86</b>         | 0 | 0 | 0 | 12  | 0.2      | 0.129619 | 0.37961  | Unclassified | chr15:101301908-101310414 | 6.507   |
| <b>Krt1</b>          | 0 | 0 | 0 | 6   | 0.1      | 0.267116 | 1.185004 | Unclassified | chr15:101675856-101683217 | 5.362   |
| <b>Ube2dn1</b>       | 0 | 0 | 0 | 0   | 0        | 0        | 0        | Unclassified | chrX:112016620-112019550  | 0.931   |
| <b>Pfdn4</b>         | 0 | 0 | 0 | 267 | 4.45     | 8.34829  | 0.075499 | Unclassified | chr2:170319927-170344567  | 22.641  |
| <b>Thns12</b>        | 0 | 0 | 0 | 54  | 0.9      | 0.460295 | 16.86304 | Stalled      | chr6:71078391-71096370    | 15.98   |
| <b>Cited1</b>        | 0 | 0 | 0 | 13  | 0.216667 | 0.486862 | 3.750281 | Unclassified | chrX:99442775-99449108    | 4.334   |
| <b>Ckb</b>           | 0 | 0 | 0 | 64  | 1.066667 | 16.1733  | 2.280341 | Unclassified | chr12:112907565-112912549 | 2.985   |
| <b>Fermt2</b>        | 0 | 0 | 0 | 59  | 0.983333 | 0.090896 | 2.243864 | Unclassified | chr14:46078466-46151740   | 71.275  |
| <b>N4bp2</b>         | 0 | 0 | 0 | 595 | 9.916667 | 4.21937  | 10.33162 | Unclassified | chr5:66152759-66218023    | 63.265  |
| <b>E130309F12Rik</b> | 0 | 0 | 0 | 210 | 3.5      | 0.047655 | 0        | Unclassified | chr4:49070333-49353133    | 280.801 |
| <b>Usp19</b>         | 0 | 0 | 0 | 640 | 10.66667 | 23.1836  | 6.456139 | Unclassified | chr9:108391019-108404028  | 11.01   |
| <b>Gtf3c3</b>        | 0 | 0 | 0 | 342 | 5.7      | 2.96454  | 28.46152 | Stalled      | chr1:54454424-54497815    | 41.392  |
| <b>Zfp784</b>        | 0 | 0 | 0 | 385 | 6.416667 | 1.31014  | 4.639975 | Unclassified | chr7:4986047-4992036      | 3.99    |
| <b>Olfr1010</b>      | 0 | 0 | 0 | 2   | 0.033333 | 0.027153 | 0        | Unclassified | chr2:85591519-85594463    | 0.945   |
| <b>Zfp747</b>        | 0 | 0 | 0 | 177 | 2.95     | 7.35618  | 15.72209 | Stalled      | chr7:134516050-134521564  | 3.515   |
| <b>Gtdc1</b>         | 0 | 0 | 0 | 553 | 9.216667 | 1.1741   | 1.055098 | Unclassified | chr2:44419941-44719142    | 297.202 |
| <b>9930021J03Rik</b> | 0 | 0 | 0 | 20  | 0.333333 | 0.830047 | 3.1875   | Unclassified | chr19:29789804-29794027   | 2.224   |
| <b>Olfr1170</b>      | 0 | 0 | 0 | 0   | 0        | 0.016249 | 0        | Unclassified | chr2:88064236-88067187    | 0.952   |
| <b>Cyp2c66</b>       | 0 | 0 | 0 | 19  | 0.316667 | 0.015726 | 0.799688 | Unclassified | chr19:39186387-39261246   | 72.86   |
| <b>Ranbp6</b>        | 0 | 0 | 0 | 206 | 3.433333 | 5.14417  | 17.68574 | Stalled      | chr19:29882597-29889464   | 4.868   |
| <b>Kctd10</b>        | 0 | 0 | 0 | 565 | 9.416667 | 15.876   | 10.1076  | Unclassified | chr5:114813581-114832514  | 16.934  |
| <b>Bod1</b>          | 0 | 0 | 0 | 201 | 3.35     | 8.19622  | 11.47627 | Unclassified | chr11:31565149-31573862   | 6.714   |
| <b>2610002D18Rik</b> | 0 | 0 | 0 | 517 | 8.616667 | 8.38499  | 13.9924  | Unclassified | chr4:134064913-134079837  | 12.925  |
| <b>Dpys</b>          | 0 | 0 | 0 | 83  | 1.383333 | 0.033033 | 1.053819 | Unclassified | chr15:39600030-39691016   | 88.987  |
| <b>Acacb</b>         | 0 | 0 | 0 | 202 | 3.366667 | 0.078544 | 0.296374 | Unclassified | chr5:114613526-114700767  | 85.242  |
| <b>Slc46a3</b>       | 0 | 0 | 0 | 295 | 4.916667 | 4.46242  | 3.068145 | Unclassified | chr5:148690016-148708378  | 16.363  |
| <b>Kcnab3</b>        | 0 | 0 | 0 | 232 | 3.866667 | 2.86856  | 3.074088 | Unclassified | chr11:69137759-69146543   | 6.785   |
| <b>Ifnz</b>          | 0 | 0 | 0 | 2   | 0.033333 | 0        | 0.316473 | Unclassified | chr4:88426034-88429496    | 1.463   |
| <b>Kcna7</b>         | 0 | 0 | 0 | 25  | 0.416667 | 0.341031 | 0.240122 | Unclassified | chr7:52659329-52666752    | 5.424   |
| <b>Kcna6</b>         | 0 | 0 | 0 | 42  | 0.7      | 0.08102  | 0        | Unclassified | chr6:126658347-126692692  | 32.346  |
| <b>Kcnab1</b>        | 0 | 0 | 0 | 722 | 12.03333 | 0.085843 | 0.816137 | Unclassified | chr3:64911564-65182141    | 268.578 |
| <b>Tsr1</b>          | 0 | 0 | 0 | 824 | 13.73333 | 24.2966  | 4.983598 | Unclassified | chr11:74709581-74722842   | 11.262  |
| <b>Rhbd12</b>        | 0 | 0 | 0 | 61  | 1.016667 | 0.036846 | 0.820366 | Unclassified | chr4:123463117-123507147  | 42.031  |
| <b>Kcna5</b>         | 0 | 0 | 0 | 6   | 0.1      | 0.023452 | 0.667332 | Unclassified | chr6:126482568-126487573  | 3.006   |
| <b>Kcna4</b>         | 0 | 0 | 0 | 5   | 0.083333 | 0.066999 | 0.695431 | Unclassified | chr2:107128810-107138659  | 7.85    |
| <b>Zfp57</b>         | 0 | 0 | 0 | 14  | 0.233333 | 0.797799 | 0.837615 | Unclassified | chr17:37137469-37147674   | 8.206   |
| <b>Gm4787</b>        | 0 | 0 | 0 | 0   | 0        | 0.116072 | 0        | Unclassified | chr12:82477977-82482473   | 2.497   |
| <b>Zfp59</b>         | 0 | 0 | 0 | 153 | 2.55     | 1.03198  | 21.43285 | Stalled      | chr7:28621602-28641793    | 18.192  |
| <b>4931417G12Rik</b> | 0 | 0 | 0 | 53  | 0.883333 | 0.330056 | 2.041098 | Unclassified | chr6:113546755-113552709  | 3.955   |
| <b>Zfp52</b>         | 0 | 0 | 0 | 200 | 3.333333 | 4.99296  | 25.30389 | Stalled      | chr17:21670502-21699565   | 27.064  |
| <b>Zfp54</b>         | 0 | 0 | 0 | 155 | 2.583333 | 3.31077  | 36.9374  | Stalled      | chr17:21558190-21572348   | 12.159  |
| <b>Lrrc55</b>        | 0 | 0 | 0 | 8   | 0.133333 | 0.035355 | 0.521531 | Unclassified | chr2:85028227-85038856    | 8.63    |
| <b>Cdc5l</b>         | 0 | 0 | 0 | 871 | 14.51667 | 8.78293  | 30.97171 | Unclassified | chr17:45528838-45572656   | 41.819  |
| <b>Zfp61</b>         | 0 | 0 | 0 | 148 | 2.466667 | 8.37524  | 8.782979 | Unclassified | chr7:25076064-25086568    | 8.505   |
| <b>Zfp60</b>         | 0 | 0 | 0 | 336 | 5.6      | 2.83114  | 42.99725 | Stalled      | chr7:28514427-28536708    | 20.282  |
| <b>Olfr120</b>       | 0 | 0 | 0 | 2   | 0.033333 | 0.115336 | 0        | Unclassified | chr17:37860943-37863936   | 0.994   |
| <b>Gmppa</b>         | 0 | 0 | 0 | 278 | 4.633333 | 21.3438  | 8.548878 | Unclassified | chr1:75430517-75439751    | 7.235   |
| <b>Prss36</b>        | 0 | 0 | 0 | 159 | 2.65     | 1.07187  | 0.077409 | Unclassified | chr7:135076151-135092239  | 14.089  |
| <b>Sult1c2</b>       | 0 | 0 | 0 | 15  | 0.25     | 0.017497 | 1.082018 | Unclassified | chr17:53968961-53987283   | 16.323  |
| <b>Olfr1308</b>      | 0 | 0 | 0 | 0   | 0        | 0        | 0        | Unclassified | chr2:111800265-111803228  | 0.964   |
| <b>Olfr367</b>       | 0 | 0 | 0 | 6   | 0.1      | 0.069717 | 1.896653 | Unclassified | chr2:37120470-37126907    | 4.438   |
| <b>Olfr204</b>       | 0 | 0 | 0 | 0   | 0        | 0.019692 | 0        | Unclassified | chr16:59314314-59317231   | 0.918   |
| <b>Gpsm2</b>         | 0 | 0 | 0 | 216 | 3.6      | 2.59015  | 12.93064 | Stalled      | chr3:108481555-108527217  | 43.663  |
| <b>Prkg2</b>         | 0 | 0 | 0 | 86  | 1.433333 | 0.040938 | 2.258173 | Unclassified | chr5:99358791-99468098    | 107.308 |
| <b>1600002K03Rik</b> | 0 | 0 | 0 | 502 | 8.366667 | 21.9282  | 14.88762 | Unclassified | chr10:79633688-79637864   | 2.177   |
| <b>Pgap3</b>         | 0 | 0 | 0 | 167 | 2.783333 | 2.84381  | 16.19384 | Stalled      | chr11:98249985-98263804   | 11.82   |
| <b>Msa46b</b>        | 0 | 0 | 0 | 40  | 0.666667 | 1.94273  | 1.555131 | Unclassified | chr19:11591048-11604893   | 11.846  |
| <b>Ak3i1</b>         | 0 | 0 | 0 | 66  | 1.1      | 1.4189   | 3.618068 | Unclassified | chr4:101090363-101139600  | 47.238  |
| <b>Sprr4</b>         | 0 | 0 | 0 | 1   | 0.016667 | 0        | 1        | Unclassified | chr3:92304184-92306415    | 0.232   |
| <b>Ppargc1a</b>      | 0 | 0 | 0 | 98  | 1.633333 | 0.229976 | 2.080908 | Unclassified | chr5:51845488-51947160    | 99.673  |
| <b>Fastkd2</b>       | 0 | 0 | 0 | 231 | 3.85     | 2.75465  | 6.758313 | Unclassified | chr1:63775198-63799959    | 22.762  |
| <b>Olfr533</b>       | 0 | 0 | 0 | 2   | 0.033333 | 0.033193 | 0        | Unclassified | chr7:147650101-147653064  | 0.964   |
| <b>2810008M24Rik</b> | 0 | 0 | 0 | 401 | 6.683333 | 5.80978  | 18.46405 | Unclassified | chr13:108832667-108839340 | 4.674   |
| <b>4833427G06Rik</b> | 0 | 0 | 0 | 20  | 0.333333 | 0.446504 | 4.977996 | Unclassified | chr9:50889417-50912183    | 20.767  |
| <b>Dspp</b>          | 0 | 0 | 0 | 11  | 0.183333 | 0.026032 | 0.966527 | Unclassified | chr5:104597730-104609146  | 9.417   |
| <b>Spata3</b>        | 0 | 0 | 0 | 12  | 0.2      | 0.164481 | 0.467306 | Unclassified | chr1:87916516-87926533    | 8.018   |
| <b>Sdr9c7</b>        | 0 | 0 | 0 | 21  | 0.35     | 0.049484 | 0.808972 | Unclassified | chr10:127333590-127348815 | 13.226  |



|               |   |   |   |      |          |          |          |              |                          |         |
|---------------|---|---|---|------|----------|----------|----------|--------------|--------------------------|---------|
| Gm648         | 0 | 0 | 0 | 2    | 0.033333 | 0.030794 | 0        | Unclassified | chrX:53797050-53804783   | 5.734   |
| Plxnb1        | 0 | 0 | 0 | 73   | 1.216667 | 0.096868 | 4.487902 | Unclassified | chr9:108995949-109022429 | 24.481  |
| Hsd3b6        | 0 | 0 | 0 | 6    | 0.1      | 0.010021 | 1.330039 | Unclassified | chr3:98609426-98620366   | 8.941   |
| H1fmt         | 0 | 0 | 0 | 7    | 0.116667 | 0.028996 | 0.739261 | Unclassified | chr15:98086412-98089738  | 1.327   |
| Xylb          | 0 | 0 | 0 | 220  | 3.666667 | 0.980998 | 12.46941 | Stalled      | chr9:119264498-119302438 | 35.941  |
| Olfr25        | 0 | 0 | 0 | 1    | 0.016667 | 0        | 1        | Unclassified | chr9:38135076-38138143   | 1.068   |
| Nr0b1         | 0 | 0 | 0 | 1    | 0.016667 | 0.014288 | 0        | Unclassified | chrX:83435113-83441283   | 4.171   |
| Agtrap        | 0 | 0 | 0 | 164  | 2.733333 | 3.78497  | 3.918462 | Unclassified | chr4:147451169-147464173 | 11.005  |
| Agxt          | 0 | 0 | 0 | 17   | 0.283333 | 0        | 1.652052 | Unclassified | chr1:95029852-95041998   | 10.147  |
| Acsbg2        | 0 | 0 | 0 | 85   | 1.416667 | 0.024571 | 1.69612  | Unclassified | chr17:56982526-57015870  | 31.345  |
| Gfral         | 0 | 0 | 0 | 20   | 0.333333 | 0.030809 | 0.729555 | Unclassified | chr9:76011908-76063464   | 49.557  |
| Cyp2c54       | 0 | 0 | 0 | 11   | 0.183333 | 0.013816 | 0        | Unclassified | chr19:40112429-40150303  | 35.875  |
| Pabpc2        | 0 | 0 | 0 | 4    | 0.066667 | 0.524376 | 3        | Unclassified | chr18:39931150-39935736  | 2.587   |
| Pabpc1        | 0 | 0 | 0 | 1377 | 22.95    | 273.71   | 9.195754 | Unclassified | chr15:36525413-36540728  | 13.316  |
| Fam83b        | 0 | 0 | 0 | 27   | 0.45     | 0.016347 | 0.683948 | Unclassified | chr9:76338511-76395611   | 55.101  |
| P4ha1         | 0 | 0 | 0 | 480  | 8        | 5.79197  | 64.68043 | Stalled      | chr10:58784043-58836051  | 50.009  |
| Fcna          | 0 | 0 | 0 | 2    | 0.033333 | 0.184898 | 1        | Unclassified | chr2:25480186-25485494   | 3.309   |
| Fcnb          | 0 | 0 | 0 | 15   | 0.25     | 0.048272 | 0.76295  | Unclassified | chr2:27931998-27942398   | 8.401   |
| Ooep          | 0 | 0 | 0 | 4    | 0.066667 | 0.095565 | 0.255675 | Unclassified | chr9:78224709-78228395   | 1.687   |
| Fam107a       | 0 | 0 | 0 | 26   | 0.433333 | 0.077339 | 0.342466 | Unclassified | chr14:9128791-9144290    | 13.5    |
| Neto1         | 0 | 0 | 0 | 62   | 1.033333 | 0.058075 | 1.938681 | Unclassified | chr18:86562343-86671289  | 106.947 |
| Heyl          | 0 | 0 | 0 | 27   | 0.45     | 0.178162 | 1.734738 | Unclassified | chr4:122908798-122927113 | 16.316  |
| Prokr2        | 0 | 0 | 0 | 31   | 0.516667 | 0.151326 | 0.804032 | Unclassified | chr2:132196066-132213183 | 15.118  |
| Asb12         | 0 | 0 | 0 | 4    | 0.066667 | 0        | 0        | Unclassified | chrX:92665537-92675468   | 7.932   |
| Asnsd1        | 0 | 0 | 0 | 251  | 4.183333 | 18.6305  | 41.51513 | Stalled      | chr1:53401487-53411543   | 8.057   |
| Fam160b1      | 0 | 0 | 0 | 601  | 10.01667 | 3.73506  | 20.86424 | Unclassified | chr19:57433498-57464084  | 28.587  |
| Olfr1281      | 0 | 0 | 0 | 0    | 0        | 0.026668 | 0        | Unclassified | chr2:111166577-111169495 | 0.919   |
| Npc111        | 0 | 0 | 0 | 27   | 0.45     | 0.033646 | 0.843556 | Unclassified | chr11:6111013-6132248    | 19.236  |
| Cntnap5b      | 0 | 0 | 0 | 292  | 4.866667 | 0.045057 | 0.710631 | Unclassified | chr1:101667341-102382519 | 713.179 |
| Olfr524       | 0 | 0 | 0 | 2    | 0.033333 | 0        | 1        | Unclassified | chr7:147387710-147390667 | 0.958   |
| 4933402J07Rik | 0 | 0 | 0 | 22   | 0.366667 | 0.037585 | 0.536342 | Unclassified | chr8:90085805-90113096   | 25.292  |
| Wac           | 0 | 0 | 0 | 1123 | 18.71667 | 6.75859  | 25.18625 | Unclassified | chr18:7867194-7929025    | 59.832  |
| Nol6          | 0 | 0 | 0 | 425  | 7.083333 | 16.1194  | 4.395986 | Unclassified | chr4:41061459-41073372   | 9.914   |
| AI597468      | 0 | 0 | 0 | 292  | 4.866667 | 3.25271  | 38.2396  | Stalled      | chr10:84563371-84580492  | 15.122  |
| 2610305D13Rik | 0 | 0 | 0 | 2    | 0.033333 | 0        | 0        | Unclassified | chr4:146986044-147018617 | 30.574  |
| Shc3          | 0 | 0 | 0 | 164  | 2.733333 | 0.016688 | 1.837058 | Unclassified | chr13:51526410-51664453  | 136.044 |
| Shcbp1        | 0 | 0 | 0 | 308  | 5.133333 | 8.7456   | 10.19922 | Unclassified | chr8:4735979-4781534     | 43.556  |
| Shbg          | 0 | 0 | 0 | 5    | 0.083333 | 0.17307  | 0        | Unclassified | chr11:69428317-69433407  | 3.091   |
| 2010109I03Rik | 0 | 0 | 0 | 13   | 0.216667 | 0.237717 | 1.01174  | Unclassified | chr15:74708765-74714134  | 3.37    |
| Mrpl45        | 0 | 0 | 0 | 289  | 4.816667 | 17.5998  | 13.63902 | Unclassified | chr11:97175029-97191234  | 14.206  |
| Hsd17b13      | 0 | 0 | 0 | 33   | 0.55     | 0.416151 | 0.411141 | Unclassified | chr5:104384462-104408407 | 21.946  |
| Mt1           | 0 | 0 | 0 | 161  | 2.683333 | 18.8408  | 1.410334 | Elongating   | chr8:96700988-96704225   | 1.238   |
| Fanc1         | 0 | 0 | 0 | 491  | 8.183333 | 5.72274  | 60.18464 | Stalled      | chr11:26285083-26371876  | 84.794  |
| Apol7c        | 0 | 0 | 0 | 16   | 0.266667 | 0.120396 | 1.358663 | Unclassified | chr15:77355296-77365745  | 8.45    |
| Krtap5-2      | 0 | 0 | 0 | 4    | 0.066667 | 0.027623 | 0.191919 | Unclassified | chr7:149360436-149363910 | 1.475   |
| Mtap7d2       | 0 | 0 | 0 | 31   | 0.516667 | 0.143679 | 1.510741 | Unclassified | chrX:155850509-155936879 | 84.371  |
| Creb314       | 0 | 0 | 0 | 111  | 1.85     | 0.181558 | 0.234268 | Unclassified | chr3:90041421-90049434   | 6.014   |
| 1700049L16Rik | 0 | 0 | 0 | 1    | 0.016667 | 0.07334  | 1        | Unclassified | chr10:71442632-71445438  | 0.807   |
| Csn1s2b       | 0 | 0 | 0 | 8    | 0.133333 | 0        | 0.686113 | Unclassified | chr5:88235146-88253446   | 16.301  |
| Wdr65         | 0 | 0 | 0 | 262  | 4.366667 | 0.136744 | 37.98941 | Stalled      | chr4:118227301-118295010 | 65.71   |
| Zfp735        | 0 | 0 | 0 | 7    | 0.116667 | 0.003405 | 0        | Unclassified | chr11:73500279-73527309  | 25.031  |
| 1190005I06Rik | 0 | 0 | 0 | 118  | 1.966667 | 1.32606  | 8.606398 | Unclassified | chr8:123132501-123160282 | 25.782  |
| Pygo2         | 0 | 0 | 0 | 432  | 7.2      | 12.0567  | 7.85998  | Unclassified | chr3:89232758-89239050   | 4.293   |
| Zfp467        | 0 | 0 | 0 | 203  | 3.383333 | 2.86856  | 1.851082 | Elongating   | chr6:48377690-48397824   | 18.135  |
| Hint2         | 0 | 0 | 0 | 28   | 2.733333 | 9.802    | 6.800165 | Unclassified | chr4:43667098-43671317   | 2.22    |
| Cdkal1        | 0 | 0 | 0 | 2544 | 42.4     | 1.71145  | 23.95778 | Unclassified | chr13:29417174-29949457  | 530.284 |
| Casd1         | 0 | 0 | 0 | 451  | 7.156667 | 3.13884  | 40.70054 | Stalled      | chr6:4549065-4593381     | 42.317  |
| Speer4f       | 0 | 0 | 0 | 2    | 0.033333 | 0        | 0        | Unclassified | chr5:16979939-16986754   | 4.816   |
| Sod3          | 0 | 0 | 0 | 7    | 0.116667 | 0.081473 | 0        | Unclassified | chr5:52753042-52760977   | 5.936   |
| Ttc29         | 0 | 0 | 0 | 139  | 2.316667 | 0        | 0.566017 | Unclassified | chr8:80735240-80918224   | 180.985 |
| Dmbt1         | 0 | 0 | 0 | 87   | 1.45     | 0.011531 | 1.576124 | Unclassified | chr7:138173589-138265142 | 89.554  |
| Crp           | 0 | 0 | 0 | 2    | 0.033333 | 0        | 0.476987 | Unclassified | chr1:174626186-174630097 | 1.912   |
| 4930549C01Rik | 0 | 0 | 0 | 5    | 0.083333 | 0.038258 | 0        | Unclassified | chr4:136164351-136169128 | 2.778   |
| Olfr1335      | 0 | 0 | 0 | 3    | 0.05     | 0.01533  | 2        | Unclassified | chr4:118481459-118484467 | 1.009   |
| Ube2e2        | 0 | 0 | 0 | 190  | 3.166667 | 0.074622 | 0        | Unclassified | chr14:19406090-19728141  | 320.052 |
| Gabra1        | 0 | 0 | 0 | 23   | 0.383333 | 0.037086 | 2.312473 | Unclassified | chr11:41944981-41998432  | 51.452  |
| Cfp           | 0 | 0 | 0 | 189  | 3.15     | 107.071  | 2.938873 | Elongating   | chrX:20502660-20510650   | 5.991   |
| Gabra3        | 0 | 0 | 0 | 38   | 0.633333 | 0.010316 | 0.857458 | Unclassified | chrX:69678014-69903585   | 223.572 |
| Pex7          | 0 | 0 | 0 | 414  | 6.9      | 5.76362  | 22.94229 | Unclassified | chr10:19579895-19629480  | 47.586  |
| Pex11b        | 0 | 0 | 0 | 365  | 6.083333 | 11.1261  | 18.7205  | Unclassified | chr3:96437352-96449304   | 9.953   |
| Pex11a        | 0 | 0 | 0 | 28   | 0.466667 | 1.28309  | 7.965623 | Unclassified | chr7:86882149-86889911   | 5.763   |
| Pet2          | 0 | 0 | 0 | 2    | 0.033333 | 0.019909 | 0        | Unclassified | chrX:86649186-86657028   | 5.843   |
| Podn          | 0 | 0 | 0 | 30   | 0.5      | 0.115294 | 0.367932 | Unclassified | chr4:107687397-107706695 | 17.299  |
| Galnt14       | 0 | 0 | 0 | 307  | 5.116667 | 0.114476 | 0.501893 | Unclassified | chr7:118615174-118925491 | 308.318 |
| Gabra6        | 0 | 0 | 0 | 9    | 0.15     | 0        | 0        | Unclassified | chr11:42119938-42136553  | 14.616  |
| Pfkfb1        | 0 | 0 | 0 | 87   | 1.45     | 0.841307 | 1.194688 | Unclassified | chrX:147022463-147078403 | 53.941  |
| Alkbh8        | 0 | 0 | 0 | 279  | 4.65     | 2.5975   | 13.37133 | Stalled      | chr9:3333230-3385846     | 50.617  |
| Cd36          | 0 | 0 | 0 | 129  | 2.15     | 4.04104  | 0        | Unclassified | chr5:17287507-17396777   | 107.271 |
| V1rd12        | 0 | 0 | 0 | 0    | 0        | 0.008503 | 0        | Unclassified | chr7:24650538-24653468   | 0.931   |
| Ptpro         | 0 | 0 | 0 | 231  | 3.85     | 0.040091 | 1.44639  | Unclassified | chr6:137198819-137413152 | 212.334 |
| Cnot6l        | 0 | 0 | 0 | 1262 | 21.03333 | 6.70907  | 23.54221 | Unclassified | chr5:96504756-96593009   | 86.254  |
| Entpd2        | 0 | 0 | 0 | 19   | 0.316667 | 0.284513 | 0.510114 | Unclassified | chr2:25249393-25256843   | 5.451   |
| Entpd5        | 0 | 0 | 0 | 290  | 4.833333 | 2.49078  | 12.65845 | Unclassified | chr12:85714806-85751979  | 35.174  |
| Lama3         | 0 | 0 | 0 | 249  | 4.15     | 0.040869 | 1.509091 | Unclassified | chr18:12490532-12741519  | 248.988 |
| Acrv1         | 0 | 0 | 0 | 23   | 0.383333 | 0.046818 | 0.640964 | Unclassified | chr9:36498804-36506422   | 5.619   |
| Faf2          | 0 | 0 | 0 | 965  | 16.08333 | 10.6266  | 12.06311 | Unclassified | chr13:54721144-54765424  | 42.281  |

|               |   |   |   |      |          |          |          |              |                           |         |
|---------------|---|---|---|------|----------|----------|----------|--------------|---------------------------|---------|
| 9330176C04Rik | 0 | 0 | 0 | 39   | 0.65     | 0.196419 | 2.5144   | Unclassified | chr9:119129610-119142693  | 11.084  |
| 1700027D21Rik | 0 | 0 | 0 | 7    | 0.116667 | 0.125178 | 0        | Unclassified | chr10:76023016-76032945   | 7.93    |
| Ccdc55        | 0 | 0 | 0 | 719  | 11.98333 | 8.92961  | 37.56135 | Unclassified | chr11:76857793-76893937   | 34.145  |
| Tusc5         | 0 | 0 | 0 | 32   | 0.533333 | 0.106792 | 1.588909 | Unclassified | chr11:76491374-76512166   | 18.793  |
| Arcn1         | 0 | 0 | 0 | 704  | 11.73333 | 26.9918  | 14.21026 | Unclassified | chr9:44550227-44577891    | 25.665  |
| Prl2c1        | 0 | 0 | 0 | 1    | 0.016667 | 0.036307 | 0        | Unclassified | chr13:27939270-27949577   | 8.308   |
| Zfp498        | 0 | 0 | 0 | 260  | 4.333333 | 6.57867  | 1.036785 | Elongating   | chr5:146042211-146052338  | 8.128   |
| Gsdmc2        | 0 | 0 | 0 | 4    | 0.066667 | 0.02068  | 0        | Unclassified | chr15:63655900-63678731   | 20.832  |
| Ift74         | 0 | 0 | 0 | 174  | 2.9      | 2.70981  | 30.78431 | Stalled      | chr4:94279210-94359924    | 78.715  |
| Parvb         | 0 | 0 | 0 | 279  | 4.65     | 0.49111  | 0.939426 | Unclassified | chr15:84060472-84146039   | 83.568  |
| Fam40b        | 0 | 0 | 0 | 99   | 1.65     | 1.25697  | 15.57429 | Stalled      | chr6:29865012-29909680    | 42.669  |
| Tmem198       | 0 | 0 | 0 | 100  | 1.666667 | 0.757008 | 14.8796  | Stalled      | chr1:75474106-75482267    | 6.162   |
| Chrna5        | 0 | 0 | 0 | 26   | 0.433333 | 0.05149  | 0        | Unclassified | chr9:54826686-54855586    | 26.901  |
| Postn         | 0 | 0 | 0 | 15   | 0.25     | 0.036193 | 1.379608 | Unclassified | chr3:54163046-54194954    | 29.909  |
| Psg25         | 0 | 0 | 0 | 19   | 0.316667 | 0.020894 | 1.303615 | Unclassified | chr7:19105050-19119576    | 12.527  |
| Cfhr1         | 0 | 0 | 0 | 3    | 0.05     | 0.029599 | 0.858757 | Unclassified | chr1:141443640-141458799  | 13.116  |
| Elane         | 0 | 0 | 0 | 6    | 0.1      | 0        | 0.695853 | Unclassified | chr10:79347056-79350961   | 1.906   |
| Cyp2c68       | 0 | 0 | 0 | 7    | 0.116667 | 0.00298  | 0        | Unclassified | chr19:39763325-39817591   | 52.267  |
| Prlhr         | 0 | 0 | 0 | 14   | 0.233333 | 0.660383 | 0.801847 | Unclassified | chr19:60542635-60546207   | 1.573   |
| Ribc1         | 0 | 0 | 0 | 363  | 6.05     | 2.28876  | 42.69914 | Stalled      | chrX:148439126-148452838  | 11.713  |
| Ormdl3        | 0 | 0 | 0 | 177  | 2.95     | 13.7771  | 11.37325 | Stalled      | chr11:98442607-98450559   | 5.953   |
| C630004H02Rik | 0 | 0 | 0 | 134  | 2.233333 | 8.911    | 4.874372 | Unclassified | chr11:115209022-115231033 | 20.012  |
| Gm11487       | 0 | 0 | 0 | 2    | 0.033333 | 0        | 0        | Unclassified | chr4:73062065-73068106    | 4.042   |
| Tnfrsf4       | 0 | 0 | 0 | 185  | 3.083333 | 1.04306  | 1.081845 | Elongating   | chr4:155385803-155390698  | 2.896   |
| L3mbtl2       | 0 | 0 | 0 | 887  | 14.78333 | 18.7588  | 5.872683 | Unclassified | chr15:81492365-81518735   | 24.371  |
| Dclk3         | 0 | 0 | 0 | 81   | 1.35     | 0.08427  | 1.174375 | Unclassified | chr9:111339584-111392115  | 50.532  |
| Ldlrad2       | 0 | 0 | 0 | 11   | 0.183333 | 0.094642 | 2.492273 | Unclassified | chr4:137126790-137133095  | 4.306   |
| Sval1         | 0 | 0 | 0 | 3    | 0.05     | 0        | 0        | Unclassified | chr6:41899626-41906097    | 4.472   |
| Slc25a29      | 0 | 0 | 0 | 282  | 4.7      | 1.57231  | 10.93388 | Unclassified | chr12:110064087-110076086 | 10      |
| Tmem54        | 0 | 0 | 0 | 13   | 0.216667 | 0.107138 | 0.711617 | Unclassified | chr4:128780859-128788829  | 5.971   |
| Sec24a        | 0 | 0 | 0 | 992  | 16.53333 | 3.65418  | 31.66193 | Unclassified | chr11:51505764-51572336   | 64.573  |
| Zcchc10       | 0 | 0 | 0 | 240  | 4        | 6.84741  | 10.14083 | Unclassified | chr11:53136190-53146803   | 8.614   |
| Gm5148        | 0 | 0 | 0 | 19   | 0.316667 | 0        | 0.758895 | Unclassified | chr3:37613111-37625282    | 10.172  |
| Klhl31        | 0 | 0 | 0 | 43   | 0.716667 | 1.36367  | 1.150432 | Unclassified | chr9:77482538-77507929    | 23.392  |
| 9430031J16Rik | 0 | 0 | 0 | 102  | 1.7      | 0.052248 | 0        | Unclassified | chr1:81071891-81268226    | 194.336 |
| Tmem229a      | 0 | 0 | 0 | 5    | 0.083333 | 0.064275 | 0.57057  | Unclassified | chr6:24901140-24908125    | 4.986   |
| 4732456N10Rik | 0 | 0 | 0 | 19   | 0.316667 | 0.050577 | 0.749805 | Unclassified | chr15:101382786-101395381 | 10.596  |
| 9330182L06Rik | 0 | 0 | 0 | 146  | 2.433333 | 0.240981 | 6.161904 | Unclassified | chr5:9264192-9480717      | 214.526 |
| Rnf186        | 0 | 0 | 0 | 4    | 0.066667 | 0.020441 | 4        | Unclassified | chr4:138521026-138524280  | 1.255   |
| Cdh7          | 0 | 0 | 0 | 48   | 0.8      | 0        | 0.766478 | Unclassified | chr1:111878313-112035578  | 155.266 |
| EG214403      | 0 | 0 | 0 | 22   | 0.366667 | 0.012924 | 0        | Unclassified | chr1:141594495-141679816  | 83.322  |
| Hspb2         | 0 | 0 | 0 | 5    | 0.083333 | 0.396696 | 0        | Unclassified | chr9:50559176-50562459    | 1.284   |
| Olfir309      | 0 | 0 | 0 | 0    | 0        | 0        | 0        | Unclassified | chr7:93454694-93457621    | 0.928   |
| Ceacam9       | 0 | 0 | 0 | 12   | 0.2      | 0        | 0.853885 | Unclassified | chr7:17305277-17311459    | 4.183   |
| Cetn1         | 0 | 0 | 0 | 4    | 0.066667 | 0.60358  | 2        | Unclassified | chr18:9618416-9621467     | 1.052   |
| Mtr           | 0 | 0 | 0 | 471  | 7.85     | 5.31447  | 19.82556 | Stalled      | chr13:12279085-12352267   | 71.183  |
| Hapln2        | 0 | 0 | 0 | 24   | 0.4      | 0.797599 | 0.627729 | Unclassified | chr3:87825671-87833433    | 5.763   |
| Emd           | 0 | 0 | 0 | 239  | 3.983333 | 35.3952  | 13.71131 | Stalled      | chrX:71498177-71503086    | 2.91    |
| Axl           | 0 | 0 | 0 | 93   | 1.55     | 0.715475 | 2.426561 | Unclassified | chr7:26542291-26575560    | 31.27   |
| Ceacam1       | 0 | 0 | 0 | 70   | 1.166667 | 3.83719  | 12.67447 | Stalled      | chr7:26246720-26264644    | 15.925  |
| Ceacam10      | 0 | 0 | 0 | 6    | 0.1      | 1.00351  | 0.563357 | Unclassified | chr7:25560222-25569672    | 7.451   |
| Cyp2j11       | 0 | 0 | 0 | 20   | 0.333333 | 0        | 0.736733 | Unclassified | chr4:95961202-96017371    | 54.17   |
| Nom1          | 0 | 0 | 0 | 491  | 8.183333 | 15.6483  | 8.13457  | Unclassified | chr5:29759206-29778709    | 17.504  |
| Olfir1474     | 0 | 0 | 0 | 1    | 0.016667 | 0        | 1        | Unclassified | chr19:13543461-13546406   | 0.946   |
| Olfir1463     | 0 | 0 | 0 | 3    | 0.05     | 0.027473 | 2        | Unclassified | chr19:13306741-13309674   | 0.934   |
| Olfir1465     | 0 | 0 | 0 | 1    | 0.016667 | 0        | 1        | Unclassified | chr19:13387849-13390773   | 0.925   |
| Fam82a2       | 0 | 0 | 0 | 562  | 9.366667 | 12.849   | 9.707837 | Unclassified | chr2:118962736-118984691  | 19.956  |
| Oas1g         | 0 | 0 | 0 | 13   | 0.216667 | 4.99039  | 1.133167 | Unclassified | chr5:121326150-121339607  | 11.458  |
| Prss7         | 0 | 0 | 0 | 45   | 0.75     | 0.027854 | 0.756415 | Unclassified | chr16:78953708-79093342   | 137.635 |
| Klk6          | 0 | 0 | 0 | 11   | 0.183333 | 0.07206  | 0.443428 | Unclassified | chr7:51078819-51087395    | 6.577   |
| Gm6614        | 0 | 0 | 0 | 20   | 0.333333 | 0.039374 | 1.353009 | Unclassified | chr6:141920716-141959266  | 36.551  |
| Prss12        | 0 | 0 | 0 | 499  | 8.316667 | 1.35696  | 0.319726 | Unclassified | chr3:123147830-123209519  | 59.69   |
| Lgmn          | 0 | 0 | 0 | 859  | 14.31667 | 54.3594  | 8.900679 | Unclassified | chr12:103632307-103679907 | 45.601  |
| Fign          | 0 | 0 | 0 | 69   | 1.15     | 0.059534 | 0.641036 | Unclassified | chr2:63815417-63938064    | 120.648 |
| Nrip2         | 0 | 0 | 0 | 150  | 2.5      | 0.540773 | 0.270257 | Unclassified | chr6:128347783-128358953  | 9.171   |
| Gpbbp1        | 0 | 0 | 0 | 1038 | 17.3     | 15.1489  | 18.37162 | Unclassified | chr13:112215887-112282249 | 64.363  |
| Ube2j1        | 0 | 0 | 0 | 609  | 10.15    | 16.3178  | 24.91278 | Unclassified | chr4:33116399-33139339    | 20.941  |
| Pnp1a3        | 0 | 0 | 0 | 61   | 1.016667 | 0.225904 | 8.03347  | Unclassified | chr15:83996245-84019951   | 21.707  |
| Tspan5        | 0 | 0 | 0 | 1185 | 19.75    | 4.20466  | 14.04648 | Unclassified | chr3:138403158-138567388  | 162.231 |
| Reep1         | 0 | 0 | 0 | 214  | 3.566667 | 0.19833  | 0.982911 | Unclassified | chr6:71655853-71760696    | 102.844 |
| Fscn3         | 0 | 0 | 0 | 67   | 1.116667 | 0.0358   | 6.05471  | Unclassified | chr6:28375900-28388622    | 10.723  |
| Zfp386        | 0 | 0 | 0 | 233  | 3.883333 | 4.30382  | 13.84577 | Unclassified | chr12:117283934-117299062 | 13.129  |
| Sftpa1        | 0 | 0 | 0 | 8    | 0.133333 | 0        | 0.945565 | Unclassified | chr14:41943076-41949662   | 4.587   |
| Krt5          | 0 | 0 | 0 | 12   | 0.2      | 0.017557 | 0        | Unclassified | chr15:101537500-101545322 | 5.823   |
| Wfdc15b       | 0 | 0 | 0 | 13   | 0.216667 | 0        | 0.383135 | Unclassified | chr2:164040189-164049399  | 7.211   |
| Pak7          | 0 | 0 | 0 | 157  | 2.616667 | 0.018796 | 0.662251 | Unclassified | chr2:135906823-136215703  | 306.881 |
| Smc1b         | 0 | 0 | 0 | 64   | 1.066667 | 0.034896 | 0        | Unclassified | chr15:84895118-84964387   | 67.27   |
| Fiz1          | 0 | 0 | 0 | 635  | 10.58333 | 12.1797  | 3.782122 | Unclassified | chr7:4958657-4968299      | 7.643   |
| Fbln5         | 0 | 0 | 0 | 88   | 1.466667 | 0.171378 | 0.913682 | Unclassified | chr12:102984774-103059265 | 72.492  |
| Clnk          | 0 | 0 | 0 | 156  | 2.6      | 0.016193 | 2.107305 | Unclassified | chr5:39097698-39269932    | 170.235 |
| Fxr2          | 0 | 0 | 0 | 554  | 9.233333 | 19.9378  | 12.11885 | Unclassified | chr11:69444472-69466799   | 20.328  |
| Igsf8         | 0 | 0 | 0 | 147  | 2.45     | 10.5576  | 12.73267 | Stalled      | chr1:174240537-174249966  | 7.43    |
| Tlx3          | 0 | 0 | 0 | 14   | 0.233333 | 0.125486 | 1.075168 | Unclassified | chr11:33100751-33105588   | 2.838   |
| Kirrel2       | 0 | 0 | 0 | 23   | 0.383333 | 0.225784 | 0        | Unclassified | chr7:31232784-31244534    | 9.751   |
| Trmt2b        | 0 | 0 | 0 | 233  | 3.883333 | 5.32923  | 12.79083 | Stalled      | chrX:130757493-130813523  | 54.031  |
| BC013529      | 0 | 0 | 0 | 253  | 4.216667 | 5.35728  | 15.55648 | Unclassified | chr10:7487744-7502715     | 12.972  |

|               |   |   |   |      |          |          |          |              |                           |          |
|---------------|---|---|---|------|----------|----------|----------|--------------|---------------------------|----------|
| Has3          | 0 | 0 | 0 | 399  | 6.65     | 0.164757 | 0.276451 | Unclassified | chr8:109392141-109406802  | 12.662   |
| Akr1e1        | 0 | 0 | 0 | 75   | 1.25     | 3.01433  | 12.88191 | Stalled      | chr13:4591735-4610410     | 16.676   |
| Uso1          | 0 | 0 | 0 | 795  | 13.25    | 13.7119  | 24.72198 | Unclassified | chr5:92564963-92631821    | 64.859   |
| Uqcc          | 0 | 0 | 0 | 913  | 15.21667 | 7.00459  | 28.70846 | Unclassified | chr2:155672630-155758042  | 83.413   |
| Msln          | 0 | 0 | 0 | 19   | 0.316667 | 0.030299 | 0.478393 | Unclassified | chr17:2588557-25893272    | 5.716    |
| Rala          | 0 | 0 | 0 | 321  | 5.35     | 6.95622  | 75.85557 | Stalled      | chr13:17972408-18038051   | 63.644   |
| P1b1          | 0 | 0 | 0 | 236  | 3.933333 | 0.108667 | 0.722522 | Unclassified | chr5:32533080-32666729    | 131.65   |
| Scn3b         | 0 | 0 | 0 | 66   | 1.1      | 0.087977 | 0.769891 | Unclassified | chr9:40074800-40099203    | 22.404   |
| Zw10          | 0 | 0 | 0 | 277  | 4.616667 | 9.95261  | 25.75094 | Stalled      | chr9:48861736-48886878    | 23.143   |
| Gamt          | 0 | 0 | 0 | 298  | 4.966667 | 2.5113   | 0.918695 | Unclassified | chr10:79720895-79725713   | 2.819    |
| Gm9104        | 0 | 0 | 0 | 2    | 0.033333 | 0        | 1        | Unclassified | chr17:45600736-45603251   | 0.516    |
| Olfr1183      | 0 | 0 | 0 | 1    | 0.016667 | 0        | 1        | Unclassified | chr2:88299498-88302410    | 0.913    |
| Fabp1         | 0 | 0 | 0 | 10   | 0.166667 | 0        | 0.742929 | Unclassified | chr6:71147881-71155017    | 5.137    |
| Lrfn1         | 0 | 0 | 0 | 49   | 0.816667 | 0.477706 | 2.304361 | Unclassified | chr7:29235003-29252567    | 15.565   |
| Cwc22         | 0 | 0 | 0 | 708  | 11.8     | 7.73133  | 5.565126 | Unclassified | chr2:77733709-77786240    | 50.532   |
| Sash3         | 0 | 0 | 0 | 994  | 16.56667 | 60.6017  | 2.916392 | Elongating   | chrX:45497703-45514740    | 15.038   |
| Sec1411       | 0 | 0 | 0 | 557  | 9.283333 | 6.13596  | 42.77001 | Unclassified | chr11:116974485-117020580 | 44.096   |
| Cyp2s1        | 0 | 0 | 0 | 34   | 0.566667 | 0.132026 | 2.744587 | Unclassified | chr7:26587494-26603549    | 14.056   |
| Tbata         | 0 | 0 | 0 | 62   | 1.033333 | 0.309758 | 0.441826 | Unclassified | chr10:60632711-60651589   | 16.879   |
| Rnf139        | 0 | 0 | 0 | 483  | 8.05     | 3.60455  | 15.35378 | Unclassified | chr15:58718783-58733945   | 13.163   |
| Ptk2          | 0 | 0 | 0 | 862  | 14.36667 | 3.04619  | 35.08882 | Stalled      | chr15:73035534-73255621   | 218.088  |
| Wfdc8         | 0 | 0 | 0 | 23   | 0.383333 | 0.028576 | 0        | Unclassified | chr2:164422712-164441126  | 16.415   |
| Ispd          | 0 | 0 | 0 | 287  | 4.783333 | 2.35284  | 41.18728 | Stalled      | chr12:37106105-37416031   | 307.927  |
| Asph          | 0 | 0 | 0 | 335  | 5.583333 | 0.798378 | 24.82862 | Stalled      | chr4:9376231-9598273      | 220.043  |
| Fscn1         | 0 | 0 | 0 | 55   | 0.916667 | 4.6412   | 2.793926 | Unclassified | chr5:143720033-143734868  | 12.836   |
| Fat3          | 0 | 0 | 0 | 341  | 5.683333 | 0.027759 | 0.580145 | Unclassified | chr9:15714636-16184675    | 468.04   |
| Dsty1         | 0 | 0 | 0 | 275  | 4.583333 | 0.995487 | 21.60833 | Stalled      | chr1:134312029-134363536  | 49.508   |
| Eif1b         | 0 | 0 | 0 | 284  | 4.733333 | 23.4073  | 11.18931 | Unclassified | chr9:120399723-120404445  | 2.723    |
| 2810459M11Rik | 0 | 0 | 0 | 12   | 0.2      | 0.250394 | 1.035796 | Unclassified | chr1:87940437-87952030    | 9.594    |
| Olfr849       | 0 | 0 | 0 | 0    | 0        | 0        | 0        | Unclassified | chr9:19243358-19246297    | 0.94     |
| Rbms3         | 0 | 0 | 0 | 533  | 8.883333 | 0.306366 | 0.558642 | Unclassified | chr9:116487226-117163597  | 674.372  |
| Lbp           | 0 | 0 | 0 | 26   | 0.433333 | 0.015227 | 0.52441  | Unclassified | chr2:158130228-158158588  | 26.361   |
| Saps3         | 0 | 0 | 0 | 2000 | 33.33333 | 16.8759  | 12.63407 | Unclassified | chr19:3454927-3577749     | 120.823  |
| Pbk           | 0 | 0 | 0 | 259  | 4.316667 | 6.57389  | 17.19468 | Unclassified | chr14:66422747-66436659   | 11.913   |
| Olfr860       | 0 | 0 | 0 | 3    | 0.05     | 0.096787 | 0        | Unclassified | chr9:19650066-19656191    | 4.126    |
| Nono          | 0 | 0 | 0 | 512  | 8.533333 | 81.4     | 11.39418 | Unclassified | chrX:98622989-98643932    | 18.944   |
| Vt1b          | 0 | 0 | 0 | 373  | 6.216667 | 31.2698  | 18.46461 | Unclassified | chr12:80257004-80275445   | 16.442   |
| C1d           | 0 | 0 | 0 | 316  | 5.266667 | 3.0508   | 34.45351 | Stalled      | chr11:17155620-17169179   | 11.56    |
| Krtap4-1      | 0 | 0 | 0 | 0    | 0        | 0.025354 | 0        | Unclassified | chr11:99488542-99491553   | 1.012    |
| Fut8          | 0 | 0 | 0 | 1281 | 21.35    | 5.64244  | 84.56381 | Stalled      | chr12:78338007-78576974   | 236.968  |
| Bicap         | 0 | 0 | 0 | 276  | 4.6      | 3.69009  | 19.75805 | Unclassified | chr2:157382097-157394097  | 10.001   |
| Olfr933       | 0 | 0 | 0 | 2    | 0.033333 | 0        | 2        | Unclassified | chr9:38781262-38784189    | 0.928    |
| Smpd3a        | 0 | 0 | 0 | 36   | 0.6      | 1.60254  | 8.341983 | Unclassified | chr10:57512349-57531636   | 17.288   |
| Bhlhb9        | 0 | 0 | 0 | 142  | 2.366667 | 6.23688  | 12.13193 | Stalled      | chrX:132418389-132425620  | 5.232    |
| Tia1          | 0 | 0 | 0 | 540  | 9        | 6.05675  | 16.20535 | Unclassified | chr6:86352212-86383399    | 29.188   |
| Tial1         | 0 | 0 | 0 | 672  | 11.2     | 7.82613  | 30.42626 | Unclassified | chr7:135583290-135607027  | 21.738   |
| Cdkn2a        | 0 | 0 | 0 | 232  | 3.866667 | 16.025   | 18.04931 | Stalled      | chr4:88920376-88942523    | 20.148   |
| Olfr600       | 0 | 0 | 0 | 1    | 0.016667 | 0        | 0        | Unclassified | chr7:110494497-110497440  | 0.944    |
| Rbm10         | 0 | 0 | 0 | 722  | 12.03333 | 17.6246  | 11.48259 | Unclassified | chrX:20192884-20228031    | 33.148   |
| Ghrl          | 0 | 0 | 0 | 261  | 4.35     | 0.412754 | 0.861359 | Unclassified | chr6:113666112-113671874  | 3.763    |
| Defb37        | 0 | 0 | 0 | 1    | 0.016667 | 0.07282  | 0        | Unclassified | chr8:18986232-18993055    | 4.824    |
| A730037C10Rik | 0 | 0 | 0 | 38   | 0.633333 | 0.016953 | 3.305653 | Unclassified | chr3:54941959-54976857    | 32.899   |
| Trip12        | 0 | 0 | 0 | 1025 | 17.08333 | 11.5196  | 15.8615  | Unclassified | chr1:84717763-84837879    | 118.117  |
| Gpr4          | 0 | 0 | 0 | 69   | 1.15     | 0.119986 | 0.93007  | Unclassified | chr7:19795886-19809525    | 11.64    |
| Pvrl3         | 0 | 0 | 0 | 65   | 1.083333 | 0.166978 | 7.308336 | Unclassified | chr16:46395117-46499080   | 101.964  |
| Plunc         | 0 | 0 | 0 | 7    | 0.116667 | 0        | 0.470806 | Unclassified | chr2:153966615-153974952  | 6.338    |
| Plxna2        | 0 | 0 | 0 | 195  | 3.25     | 0.178827 | 1.015649 | Unclassified | chr1:196444022-196643062  | 197.041  |
| Plxna3        | 0 | 0 | 0 | 97   | 1.616667 | 0.944965 | 9.27853  | Unclassified | chrX:71572404-71590028    | 15.625   |
| Zmynd19       | 0 | 0 | 0 | 479  | 7.983333 | 22.2973  | 11.61075 | Unclassified | chr2:24803321-24814933    | 9.613    |
| Slc5a2        | 0 | 0 | 0 | 54   | 0.9      | 0.055396 | 0.435208 | Unclassified | chr7:135407210-135415947  | 6.738    |
| Trpv3         | 0 | 0 | 0 | 45   | 0.75     | 0.078789 | 2.179104 | Unclassified | chr11:73079121-73110702   | 29.582   |
| Cgrrf1        | 0 | 0 | 0 | 234  | 3.9      | 7.86715  | 30.68259 | Stalled      | chr14:47449918-47473865   | 21.948   |
| Olfr1164      | 0 | 0 | 0 | 1    | 0.016667 | 0        | 1        | Unclassified | chr2:87933011-87936123    | 1.113    |
| Gzf1          | 0 | 0 | 0 | 288  | 4.8      | 2.47096  | 24.35071 | Stalled      | chr2:148504855-148518683  | 11.829   |
| Cul1          | 0 | 0 | 0 | 965  | 16.08333 | 11.0001  | 31.1188  | Unclassified | chr6:47402322-47476138    | 71.817   |
| Kbtbd8        | 0 | 0 | 0 | 267  | 4.45     | 1.44561  | 21.31001 | Stalled      | chr6:95065899-95079781    | 11.883   |
| Pcsk2         | 0 | 0 | 0 | 195  | 3.25     | 0.086506 | 0        | Unclassified | chr2:143369868-143642016  | 270.149  |
| Whamm         | 0 | 0 | 0 | 463  | 7.716667 | 8.32217  | 22.25487 | Unclassified | chr7:88714177-88741722    | 25.546   |
| Fyb           | 0 | 0 | 0 | 75   | 1.25     | 0.354147 | 1.074575 | Unclassified | chr15:6527870-6613312     | 83.443   |
| Arl11         | 0 | 0 | 0 | 15   | 0.25     | 0.47564  | 1.341148 | Unclassified | chr14:61926589-61930773   | 2.185    |
| H2-M10.6      | 0 | 0 | 0 | 2    | 0.033333 | 0        | 1        | Unclassified | chr17:36947119-36952509   | 3.391    |
| Ostb          | 0 | 0 | 0 | 15   | 0.25     | 0        | 1.287508 | Unclassified | chr9:65260559-65272580    | 10.022   |
| Actb2         | 0 | 0 | 0 | 1    | 0.016667 | 0.018731 | 0        | Unclassified | chr13:112043220-112047957 | 2.738    |
| Olfr1140      | 0 | 0 | 0 | 0    | 0        | 0        | 0        | Unclassified | chr2:87584317-87587337    | 1.021    |
| Xkr6          | 0 | 0 | 0 | 37   | 0.616667 | 0.037717 | 0.39999  | Unclassified | chr14:64411855-64438853   | 24.999   |
| Icmt          | 0 | 0 | 0 | 321  | 5.35     | 7.99137  | 16.85673 | Unclassified | chr4:151669459-151681231  | 9.773    |
| Oca2          | 0 | 0 | 0 | 148  | 2.466667 | 0.032862 | 0        | Unclassified | chr7:63493140-63791887    | 296.748  |
| ORF19         | 0 | 0 | 0 | 345  | 5.75     | 13.8249  | 8.113202 | Unclassified | chr17:66458885-66469843   | 8.959    |
| 1110049B09Rik | 0 | 0 | 0 | 82   | 1.366667 | 0.060761 | 0.42063  | Unclassified | chr12:33718660-33779740   | 59.081   |
| Krtap4-6      | 0 | 0 | 0 | 1    | 0.016667 | 0        | 1        | Unclassified | chr11:99526356-99529274   | 0.919    |
| Atp6v1b2      | 0 | 0 | 0 | 373  | 6.216667 | 17.0116  | 32.07649 | Stalled      | chr8:71610634-71637614    | 24.981   |
| Sh3kbp1       | 0 | 0 | 0 | 1332 | 22.2     | 5.92263  | 10.11012 | Stalled      | chrX:156063339-156413849  | 348.511  |
| Emp1          | 0 | 0 | 0 | 53   | 0.883333 | 0.221246 | 1.162007 | Unclassified | chr6:135310948-135333191  | 20.244   |
| Gpc6          | 0 | 0 | 0 | 625  | 10.41667 | 0.045687 | 1.889498 | Unclassified | chr14:117322536-118378751 | 1054.216 |
| Vprbp         | 0 | 0 | 0 | 868  | 14.46667 | 6.70284  | 14.72059 | Unclassified | chr9:106722306-106783323  | 59.018   |
| Serac1        | 0 | 0 | 0 | 528  | 8.8      | 1.117    | 52.36516 | Stalled      | chr17:6040570-6081739     | 39.17    |

|                      |   |   |   |      |           |          |          |              |                           |         |
|----------------------|---|---|---|------|-----------|----------|----------|--------------|---------------------------|---------|
| <b>Olf1056</b>       | 0 | 0 | 0 | 3    | 0.05      | 0        | 2        | Unclassified | chr2:86195595-86198537    | 0.943   |
| <b>Mrgpra6</b>       | 0 | 0 | 0 | 1    | 0.016667  | 0        | 0        | Unclassified | chr7:54441135-54446725    | 3.591   |
| <b>Efn1</b>          | 0 | 0 | 0 | 141  | 2.35      | 0.027444 | 1.323688 | Unclassified | chr5:140381896-140450676  | 66.781  |
| <b>Mysm1</b>         | 0 | 0 | 0 | 749  | 12.483333 | 2.19227  | 40.80155 | Unclassified | chr4:94608731-94647791    | 37.061  |
| <b>6330408A02Rik</b> | 0 | 0 | 0 | 434  | 7.233333  | 1.56897  | 36.29633 | Unclassified | chr7:13844315-13866070    | 19.756  |
| <b>Gnpnat1</b>       | 0 | 0 | 0 | 303  | 5.05      | 1.6527   | 22.8981  | Unclassified | chr14:45996095-46010471   | 12.377  |
| <b>Tp1</b>           | 0 | 0 | 0 | 488  | 8.133333  | 215.302  | 7.210078 | Unclassified | chr6:124760609-124766314  | 3.706   |
| <b>Folr1</b>         | 0 | 0 | 0 | 20   | 0.333333  | 0.194279 | 1.245229 | Unclassified | chr7:109006844-109021197  | 12.354  |
| <b>E130308A19Rik</b> | 0 | 0 | 0 | 658  | 10.96667  | 2.92008  | 40.70416 | Stalled      | chr4:59637092-59767175    | 128.084 |
| <b>Lin7a</b>         | 0 | 0 | 0 | 66   | 1.1       | 0.032891 | 1.42141  | Unclassified | chr10:106706886-106862199 | 153.314 |
| <b>Rod1</b>          | 0 | 0 | 0 | 1231 | 20.51667  | 11.7361  | 22.80981 | Unclassified | chr4:59484741-59564236    | 77.496  |
| <b>Shmt2</b>         | 0 | 0 | 0 | 536  | 8.933333  | 78.2442  | 1.891489 | Elongating   | chr10:126954194-126961491 | 5.298   |
| <b>Mospd2</b>        | 0 | 0 | 0 | 201  | 3.35      | 3.47246  | 25.89357 | Stalled      | chrX:161376140-161420267  | 42.128  |
| <b>Mgat5b</b>        | 0 | 0 | 0 | 110  | 1.833333  | 0.051217 | 2.380476 | Unclassified | chr11:116778176-116848258 | 68.083  |
| <b>Gm4736</b>        | 0 | 0 | 0 | 50   | 0.833333  | 0        | 1.676676 | Unclassified | chr6:132064238-132316153  | 249.916 |
| <b>Slc26a11</b>      | 0 | 0 | 0 | 232  | 3.866667  | 1.40433  | 17.92663 | Stalled      | chr11:119214870-119242390 | 25.521  |
| <b>Rtn4</b>          | 0 | 0 | 0 | 579  | 9.65      | 29.3449  | 33.93157 | Unclassified | chr11:29590897-29644414   | 51.518  |
| <b>Tmed10</b>        | 0 | 0 | 0 | 854  | 14.23333  | 20.3187  | 14.06428 | Unclassified | chr12:86681563-86717667   | 34.105  |
| <b>Gm11294</b>       | 0 | 0 | 0 | 0    | 0         | 0        | 0        | Unclassified | chr13:22334083-22336974   | 0.892   |
| <b>Ccdc38</b>        | 0 | 0 | 0 | 344  | 5.733333  | 0.3408   | 7.770579 | Unclassified | chr10:93001376-93047071   | 43.696  |
| <b>Olf1163</b>       | 0 | 0 | 0 | 0    | 0         | 0.04043  | 0        | Unclassified | chr2:87910586-87913537    | 0.952   |
| <b>Olf432</b>        | 0 | 0 | 0 | 5    | 0.083333  | 0.10246  | 3        | Unclassified | chr1:175978505-175981443  | 0.939   |
| <b>5330439B14Rik</b> | 0 | 0 | 0 | 10   | 0.166667  | 0.046036 | 1.152048 | Unclassified | chr6:142561114-142574982  | 11.869  |
| <b>Olf430</b>        | 0 | 0 | 0 | 1    | 0.016667  | 0.080606 | 0        | Unclassified | chr1:175997430-176000384  | 0.955   |
| <b>Olf433</b>        | 0 | 0 | 0 | 9    | 0.15      | 0.134257 | 2        | Unclassified | chr1:175970063-175973065  | 1.003   |
| <b>Naa25</b>         | 0 | 0 | 0 | 2019 | 33.65     | 11.2587  | 6.506684 | Unclassified | chr5:121845990-121890122  | 42.133  |
| <b>Olf429</b>        | 0 | 0 | 0 | 0    | 0         | 0        | 0        | Unclassified | chr1:176017168-176020110  | 0.943   |
| <b>Olf512</b>        | 0 | 0 | 0 | 2    | 0.033333  | 0        | 2        | Unclassified | chr7:115854868-115857849  | 0.982   |
| <b>Syt16</b>         | 0 | 0 | 0 | 169  | 2.816667  | 0.056856 | 1.239906 | Unclassified | chr12:75096747-75368903   | 270.157 |
| <b>Med13</b>         | 0 | 0 | 0 | 1509 | 25.15     | 5.00941  | 5.8033   | Unclassified | chr11:86079216-86173027   | 91.812  |
| <b>Slc28a3</b>       | 0 | 0 | 0 | 67   | 1.16667   | 0.058971 | 0.461537 | Unclassified | chr13:58654668-58714238   | 57.571  |
| <b>Nppb</b>          | 0 | 0 | 0 | 6    | 0.1       | 0.082156 | 1.473907 | Unclassified | chr4:147357897-147361314  | 1.418   |
| <b>Nppc</b>          | 0 | 0 | 0 | 18   | 0.3       | 1.98996  | 4.359894 | Unclassified | chr1:88562865-88569147    | 4.283   |
| <b>Gm5595</b>        | 0 | 0 | 0 | 92   | 1.533333  | 0.57671  | 41.45875 | Stalled      | chr7:49915477-49950088    | 32.612  |
| <b>Hmg11</b>         | 0 | 0 | 0 | 1    | 0.016667  | 0        | 1        | Unclassified | chr7:49274094-49277375    | 1.282   |
| <b>C4a</b>           | 0 | 0 | 0 | 79   | 1.316667  | 0.206631 | 5.690441 | Unclassified | chr17:34946036-34962399   | 14.364  |
| <b>Zfp358</b>        | 0 | 0 | 0 | 59   | 0.983333  | 3.25626  | 4.338983 | Unclassified | chr8:3491137-3497208      | 4.072   |
| <b>Gm5591</b>        | 0 | 0 | 0 | 0    | 0         | 0.023739 | 0        | Unclassified | chr7:39303157-39315212    | 10.056  |
| <b>Eno2</b>          | 0 | 0 | 0 | 115  | 1.916667  | 2.91248  | 8.390037 | Unclassified | chr6:124710072-124721527  | 9.456   |
| <b>Pnoc</b>          | 0 | 0 | 0 | 35   | 0.583333  | 0.094735 | 0.416322 | Unclassified | chr14:66019509-66046046   | 24.538  |
| <b>Tmed2</b>         | 0 | 0 | 0 | 389  | 6.483333  | 22.4802  | 4.440473 | Unclassified | chr5:124988799-125000512  | 9.714   |
| <b>Nfib</b>          | 0 | 0 | 0 | 151  | 2.516667  | 0.059538 | 0        | Unclassified | chr4:81936076-82153212    | 215.137 |
| <b>Klhl14</b>        | 0 | 0 | 0 | 337  | 5.616667  | 5.53001  | 10.8507  | Stalled      | chr18:21708877-21812869   | 101.993 |
| <b>Npepl1</b>        | 0 | 0 | 0 | 606  | 10.1      | 34.7421  | 5.3067   | Unclassified | chr2:173933851-173948201  | 12.351  |
| <b>Krtap16-4</b>     | 0 | 0 | 0 | 1    | 0.016667  | 0        | 0        | Unclassified | chr16:88885030-88887334   | 0.305   |
| <b>Rdh9</b>          | 0 | 0 | 0 | 6    | 0.1       | 0.02611  | 0        | Unclassified | chr10:127211460-127229753 | 16.294  |
| <b>4930579J09Rik</b> | 0 | 0 | 0 | 33   | 0.55      | 0.114275 | 0.197764 | Unclassified | chr19:10548746-10559387   | 8.642   |
| <b>4930578I06Rik</b> | 0 | 0 | 0 | 19   | 0.316667  | 0.024814 | 0        | Unclassified | chr14:64589958-64608617   | 16.66   |
| <b>Clec10a</b>       | 0 | 0 | 0 | 8    | 0.133333  | 0.028564 | 1.814698 | Unclassified | chr11:69978275-69984336   | 4.062   |
| <b>BC055004</b>      | 0 | 0 | 0 | 30   | 0.5       | 0.088514 | 0.979852 | Unclassified | chr5:138665131-138693103  | 25.973  |
| <b>Ccno</b>          | 0 | 0 | 0 | 68   | 1.133333  | 1.0111   | 12.77835 | Stalled      | chr13:113776009-113780986 | 2.978   |
| <b>Ddx47</b>         | 0 | 0 | 0 | 313  | 5.216667  | 35.0113  | 3.426028 | Unclassified | chr6:134959637-134973789  | 12.153  |
| <b>Chrnd</b>         | 0 | 0 | 0 | 12   | 0.2       | 0.066064 | 0        | Unclassified | chr1:89085226-89096645    | 9.42    |
| <b>Aadac</b>         | 0 | 0 | 0 | 7    | 0.116667  | 0.029713 | 0        | Unclassified | chr3:59833709-59844079    | 8.371   |
| <b>Ar15</b>          | 0 | 0 | 0 | 1421 | 23.68333  | 10.1561  | 62.44089 | Stalled      | chr13:114582715-114947669 | 362.955 |
| <b>Fbxo36</b>        | 0 | 0 | 0 | 252  | 4.2       | 3.24601  | 43.738   | Stalled      | chr1:84834415-84897061    | 60.647  |
| <b>Prr13</b>         | 0 | 0 | 0 | 154  | 2.566667  | 35.2136  | 4.953599 | Unclassified | chr15:102287600-102293236 | 3.637   |
| <b>Anapc11</b>       | 0 | 0 | 0 | 632  | 10.53333  | 10.4286  | 33.75959 | Unclassified | chr11:120457734-120469512 | 9.779   |
| <b>Olf134</b>        | 0 | 0 | 0 | 1    | 0.016667  | 0.016456 | 0        | Unclassified | chr17:38310030-38312969   | 0.94    |
| <b>Mcts2</b>         | 0 | 0 | 0 | 82   | 1.366667  | 2.7956   | 59       | Unclassified | chr2:152510883-152513678  | 0.796   |
| <b>2410001C21Rik</b> | 0 | 0 | 0 | 863  | 14.38333  | 27.0075  | 7.203002 | Unclassified | chr2:172264077-172295399  | 29.323  |
| <b>Mrps15</b>        | 0 | 0 | 0 | 358  | 5.966667  | 49.5004  | 8.523049 | Unclassified | chr4:125722171-125732780  | 8.61    |
| <b>Cxx1a</b>         | 0 | 0 | 0 | 16   | 0.266667  | 9.97707  | 3.010989 | Unclassified | chrX:50945667-50948940    | 1.274   |
| <b>Nudt2</b>         | 0 | 0 | 0 | 306  | 5.1       | 10.2159  | 40.15185 | Stalled      | chr4:41410180-41427959    | 15.78   |
| <b>Asf1a</b>         | 0 | 0 | 0 | 685  | 11.41667  | 6.71212  | 11.20969 | Unclassified | chr10:53314766-53329021   | 12.256  |
| <b>Olf1184</b>       | 0 | 0 | 0 | 1    | 0.016667  | 0.068463 | 1        | Unclassified | chr2:88324890-88327826    | 0.937   |
| <b>Abca6</b>         | 0 | 0 | 0 | 48   | 0.8       | 0.055863 | 2.507893 | Unclassified | chr11:110038137-110115090 | 74.954  |
| <b>Adhfe1</b>        | 0 | 0 | 0 | 353  | 5.883333  | 0.099287 | 5.703417 | Unclassified | chr1:9536126-9568049      | 29.924  |
| <b>Hipk3</b>         | 0 | 0 | 0 | 829  | 13.81667  | 5.23598  | 23.37486 | Unclassified | chr2:104266638-104336646  | 68.009  |
| <b>Bruno6</b>        | 0 | 0 | 0 | 40   | 0.666667  | 0.101846 | 1.804929 | Unclassified | chr9:59424143-59455099    | 28.957  |
| <b>Cnih</b>          | 0 | 0 | 0 | 346  | 5.766667  | 10.6571  | 10.18386 | Unclassified | chr14:47395241-47410032   | 12.792  |
| <b>Nlrp4e</b>        | 0 | 0 | 0 | 19   | 0.316667  | 0        | 0        | Unclassified | chr7:24084210-24147296    | 61.087  |
| <b>Fhl5</b>          | 0 | 0 | 0 | 24   | 0.4       | 0        | 0.677258 | Unclassified | chr4:25127055-25172023    | 42.969  |
| <b>Lrrc4b</b>        | 0 | 0 | 0 | 43   | 0.716667  | 0.207399 | 0.737444 | Unclassified | chr7:51695856-51718714    | 20.859  |
| <b>Myl10</b>         | 0 | 0 | 0 | 25   | 0.416667  | 0.084372 | 1.339114 | Unclassified | chr5:137167015-137176964  | 7.95    |
| <b>Camp</b>          | 0 | 0 | 0 | 27   | 0.45      | 0        | 1.831945 | Unclassified | chr9:109749890-109753970  | 2.081   |
| <b>Prss27</b>        | 0 | 0 | 0 | 102  | 1.7       | 0.055772 | 0        | Unclassified | chr17:24173209-24182916   | 7.708   |
| <b>5430435G22Rik</b> | 0 | 0 | 0 | 80   | 1.333333  | 0.137001 | 1.228209 | Unclassified | chr1:133583271-133610041  | 24.771  |
| <b>Lce1c</b>         | 0 | 0 | 0 | 2    | 0.033333  | 0        | 0.402271 | Unclassified | chr3:92481168-92484840    | 1.673   |
| <b>Fn1</b>           | 0 | 0 | 0 | 79   | 1.316667  | 0.254329 | 2.420995 | Unclassified | chr1:71632096-71701745    | 67.65   |
| <b>Fam122c</b>       | 0 | 0 | 0 | 8    | 0.133333  | 0        | 0        | Unclassified | chrX:50624609-50654678    | 28.07   |
| <b>Gm13083</b>       | 0 | 0 | 0 | 2    | 0.033333  | 0.009936 | 0.721758 | Unclassified | chr4:143202905-143208498  | 3.594   |
| <b>Dmkn</b>          | 0 | 0 | 0 | 36   | 0.6       | 0.199695 | 0.317885 | Unclassified | chr7:31546774-31566084    | 17.311  |
| <b>Fam125a</b>       | 0 | 0 | 0 | 108  | 1.8       | 44.6778  | 6.13269  | Unclassified | chr8:74064828-74071925    | 5.098   |
| <b>Rhox12</b>        | 0 | 0 | 0 | 2    | 0.033333  | 0        | 0        | Unclassified | chrX:35457238-35466084    | 6.847   |
| <b>Esrp1</b>         | 0 | 0 | 0 | 64   | 1.066667  | 0.072971 | 0.48097  | Unclassified | chr4:11259184-11315930    | 54.747  |



|               |   |          |   |      |          |          |          |              |                           |         |
|---------------|---|----------|---|------|----------|----------|----------|--------------|---------------------------|---------|
| A830093I24Rik | 0 | 0        | 0 | 114  | 1.9      | 0.785786 | 52.30657 | Stalled      | chr12:4753021-4778073     | 23.053  |
| Zfyve1        | 0 | 0        | 0 | 322  | 5.366667 | 4.74259  | 9.200485 | Unclassified | chr12:84887890-84940097   | 50.208  |
| Cdkn1b        | 0 | 0        | 0 | 426  | 7.1      | 26.2843  | 14.71364 | Unclassified | chr6:134868418-134875543  | 5.126   |
| Cyp4a32       | 0 | 0        | 0 | 10   | 0.166667 | 0.033481 | 0        | Unclassified | chr4:115271542-115294971  | 21.43   |
| BC021614      | 0 | 0        | 0 | 18   | 0.3      | 0.486394 | 1.699134 | Unclassified | chr19:4057486-4061294     | 1.809   |
| Antxrl        | 0 | 0        | 0 | 19   | 0.316667 | 0.012057 | 0        | Unclassified | chr14:34864655-34889185   | 22.531  |
| B3gnt4        | 0 | 0        | 0 | 51   | 0.85     | 0.179968 | 0.89983  | Unclassified | chr5:123958468-123961891  | 1.424   |
| Fmr1          | 0 | 0        | 0 | 320  | 5.333333 | 5.97884  | 45.92026 | Stalled      | chrX:65929729-65971136    | 39.408  |
| Wdr44         | 0 | 0        | 0 | 318  | 5.3      | 3.21616  | 51.12381 | Stalled      | chrX:23268242-23383127    | 112.886 |
| Sephs1        | 0 | 0        | 0 | 778  | 12.96667 | 9.52535  | 8.826565 | Unclassified | chr2:4800609-4831602      | 28.994  |
| Ube2ql1       | 0 | 0        | 0 | 46   | 0.766667 | 0.688745 | 1.386002 | Unclassified | chr13:69841709-69880775   | 37.067  |
| Sfcd1         | 0 | 0        | 0 | 876  | 14.6     | 8.11415  | 25.90184 | Unclassified | chr12:52476566-52551083   | 72.518  |
| 3110035E14Rik | 0 | 0        | 0 | 32   | 0.533333 | 0.1126   | 0        | Unclassified | chr1:9589347-9617223      | 25.877  |
| Gm5800        | 0 | 0        | 0 | 3    | 0.05     | 0        | 0        | Unclassified | chr14:52331318-52338807   | 5.49    |
| Epb4.1i4b     | 0 | 0        | 0 | 142  | 2.366667 | 0.302455 | 1.536193 | Unclassified | chr4:57074597-57158028    | 81.432  |
| Serpnb1b      | 0 | 0        | 0 | 18   | 0.3      | 0.169704 | 0.398445 | Unclassified | chr13:33173971-33186243   | 10.273  |
| V1rb3         | 0 | 0        | 0 | 1    | 0.016667 | 0        | 0        | Unclassified | chr6:90173310-90176432    | 1.123   |
| Fmo1          | 0 | 0        | 0 | 25   | 0.416667 | 0.02755  | 1.220194 | Unclassified | chr1:164759691-164798679  | 36.989  |
| Nkain4        | 0 | 0        | 0 | 23   | 0.383333 | 0.162982 | 0.998128 | Unclassified | chr2:180669476-180691404  | 19.929  |
| Golgb1        | 0 | 0        | 0 | 327  | 5.45     | 6.7611   | 1.045874 | Unclassified | chr16:36883096-36933169   | 48.074  |
| Irx4          | 0 | 0        | 0 | 28   | 0.466667 | 0.236713 | 0.505837 | Unclassified | chr13:73395944-73407068   | 9.125   |
| Dirc2         | 0 | 0        | 0 | 500  | 8.333333 | 3.9623   | 7.353679 | Unclassified | chr16:35694988-35771442   | 74.455  |
| Rac1          | 0 | 0        | 0 | 877  | 14.61667 | 38.4788  | 10.03842 | Unclassified | chr5:144266348-144290861  | 22.514  |
| Kbtbd12       | 0 | 0        | 0 | 64   | 1.066667 | 0.195273 | 30.4292  | Stalled      | chr6:88563744-88579439    | 13.696  |
| Rad21         | 0 | 0        | 0 | 881  | 14.68333 | 31.4605  | 9.879538 | Unclassified | chr15:51794150-51825306   | 29.157  |
| Rad1          | 0 | 0        | 0 | 499  | 8.316667 | 12.8659  | 29.24646 | Unclassified | chr15:10413788-10423446   | 7.659   |
| Pyrox2        | 0 | 0        | 0 | 46   | 0.766667 | 0.135372 | 3.403733 | Unclassified | chr19:42800347-42829265   | 26.919  |
| 4930417G10Rik | 0 | 0        | 0 | 139  | 2.316667 | 0.058921 | 0.295526 | Unclassified | chr12:4720610-4747189     | 24.58   |
| Sspn          | 0 | 0        | 0 | 58   | 0.966667 | 0.313924 | 2.22595  | Unclassified | chr6:145880666-145913745  | 31.08   |
| Kpna6         | 0 | 0        | 0 | 467  | 7.783333 | 6.91285  | 9.062209 | Unclassified | chr4:129321222-129352011  | 28.79   |
| Rps6kc1       | 0 | 0        | 0 | 491  | 8.183333 | 2.13084  | 20.93024 | Stalled      | chr1:192619947-192737649  | 115.703 |
| Cicn5         | 0 | 0        | 0 | 137  | 2.283333 | 1.75477  | 1.126611 | Unclassified | chrX:6735944-6767840      | 29.897  |
| Cicn1         | 0 | 0        | 0 | 110  | 1.833333 | 0.137382 | 6.10865  | Unclassified | chr6:42234683-42264655    | 27.973  |
| Cica1         | 0 | 0        | 0 | 8    | 0.133333 | 0.06954  | 0.807824 | Unclassified | chr3:144393279-144425703  | 30.425  |
| Cmbl          | 0 | 0        | 0 | 263  | 4.383333 | 0.049246 | 0.217138 | Unclassified | chr15:31496666-31519874   | 21.209  |
| Fastkd3       | 0 | 0        | 0 | 656  | 10.93333 | 4.47604  | 13.9483  | Unclassified | chr13:68719124-68731156   | 10.033  |
| Notum         | 0 | 0        | 0 | 26   | 0.433333 | 0.102377 | 1.309803 | Unclassified | chr11:120515118-120524151 | 7.034   |
| Atg4a         | 0 | 0        | 0 | 192  | 3.2      | 1.51479  | 25.54132 | Stalled      | chrX:137489455-137598813  | 107.359 |
| Phax          | 0 | 0        | 0 | 387  | 6.45     | 18.2761  | 12.86949 | Unclassified | chr18:56730524-56747366   | 14.843  |
| Akap10        | 0 | 0        | 0 | 1079 | 17.98333 | 3.89251  | 24.04371 | Unclassified | chr11:61684808-61745728   | 58.921  |
| Crtap         | 0 | 0        | 0 | 365  | 6.083333 | 7.84223  | 12.10892 | Unclassified | chr9:114284248-114301830  | 15.583  |
| Anxa1         | 0 | 0        | 0 | 8    | 0.133333 | 0.312369 | 0        | Unclassified | chr19:20447923-20467161   | 17.239  |
| Dnajb8        | 0 | 0        | 0 | 2    | 0.033333 | 0.025558 | 1        | Unclassified | chr6:88170261-88173250    | 0.99    |
| Olfr148       | 0 | 0        | 0 | 0    | 0        | 0        | 0        | Unclassified | chr9:39419153-39422086    | 0.934   |
| Sic16a12      | 0 | 0        | 0 | 101  | 1.683333 | 0.069546 | 1.779139 | Unclassified | chr19:34742895-34823601   | 78.707  |
| AI317395      | 0 | 0        | 0 | 19   | 0.316667 | 0.810148 | 2.408066 | Unclassified | chr10:39721385-39747074   | 23.69   |
| Lipk          | 0 | 0        | 0 | 15   | 0.25     | 0.018459 | 0.733379 | Unclassified | chr19:34080779-34122287   | 39.509  |
| Ccnb1ip1      | 0 | 0        | 0 | 10   | 0.166667 | 0.042494 | 0.878295 | Unclassified | chr14:51408923-51417403   | 6.481   |
| Sic35e3       | 0 | 0        | 0 | 205  | 3.416667 | 3.48084  | 18.64741 | Stalled      | chr10:117170733-117185414 | 12.682  |
| Skint8        | 0 | 0        | 0 | 10   | 0.166667 | 0        | 0        | Unclassified | chr4:111590159-111622961  | 30.803  |
| Reg1          | 0 | 0        | 0 | 2    | 0.033333 | 0        | 0        | Unclassified | chr6:78373976-78378660    | 2.685   |
| Ythdf3        | 0 | 0        | 0 | 769  | 12.81667 | 7.53599  | 26.47691 | Unclassified | chr3:16081182-16117035    | 33.854  |
| 4933406M09Rik | 0 | 0        | 0 | 18   | 0.3      | 0.065168 | 0.448324 | Unclassified | chr1:136280516-136287560  | 5.045   |
| Cela3b        | 0 | 0        | 0 | 11   | 0.183333 | 0.035635 | 0.486125 | Unclassified | chr4:136976922-136988435  | 9.514   |
| Map6d1        | 0 | 0        | 0 | 123  | 2.05     | 0.78248  | 0.53304  | Unclassified | chr16:20233381-20243431   | 8.051   |
| Vangl2        | 0 | 0        | 0 | 197  | 3.283333 | 3.06719  | 9.093588 | Unclassified | chr1:173934501-173959399  | 22.899  |
| Prps1i1       | 0 | 0        | 0 | 3    | 0.05     | 0.022941 | 0.403697 | Unclassified | chr12:35667432-35671108   | 1.677   |
| Ascc2         | 0 | 0        | 0 | 826  | 13.76667 | 16.5339  | 5.642645 | Unclassified | chr11:4535795-4583388     | 45.594  |
| Lrrc1         | 0 | 0        | 0 | 611  | 10.18333 | 4.68296  | 27.85253 | Stalled      | chr9:77278629-77394659    | 114.031 |
| Chia          | 0 | 43.90717 | 0 | 14   | 0.233333 | 0.025229 | 0.577043 | Unclassified | chr3:105914299-105935034  | 18.736  |
| Ndst4         | 0 | 0        | 0 | 119  | 1.983333 | 0.040407 | 0        | Unclassified | chr3:125105008-125427904  | 320.897 |
| Abca15        | 0 | 0        | 0 | 26   | 0.433333 | 0.040839 | 1.544577 | Unclassified | chr7:127470197-127551201  | 79.005  |
| Zmat1         | 0 | 0        | 0 | 257  | 4.283333 | 0.567094 | 98.28197 | Stalled      | chrX:131505911-131545748  | 37.838  |
| Prkar1b       | 0 | 0        | 0 | 188  | 3.133333 | 0.180033 | 1.540162 | Unclassified | chr5:139493257-139607706  | 112.45  |
| Oclr          | 0 | 0        | 0 | 108  | 1.8      | 0.877863 | 10.36977 | Stalled      | chrX:45263632-45319043    | 53.412  |
| Olfr105       | 0 | 0        | 0 | 0    | 0        | 0        | 0        | Unclassified | chr17:37517451-37520431   | 0.981   |
| Olfr324       | 0 | 0        | 0 | 6    | 0.1      | 0.102896 | 3        | Unclassified | chr11:58408846-58411967   | 1.122   |
| Olfr479       | 0 | 0        | 0 | 0    | 0        | 0.078148 | 0        | Unclassified | chr7:115196497-115199481  | 0.985   |
| Kcnd2         | 0 | 0        | 0 | 240  | 4        | 0.039391 | 2.746481 | Unclassified | chr6:21164108-21679805    | 513.698 |
| Prdm8         | 0 | 0        | 0 | 22   | 0.366667 | 0.624471 | 0.710021 | Unclassified | chr5:98607887-98616467    | 6.581   |
| Pramef12      | 0 | 0        | 0 | 17   | 0.283333 | 0.026049 | 0.496729 | Unclassified | chr4:143981576-144000367  | 16.792  |
| Rnase9        | 0 | 0        | 0 | 2    | 0.033333 | 0.043189 | 2        | Unclassified | chr14:51658133-51663542   | 3.41    |
| Nipa3         | 0 | 0        | 0 | 155  | 2.583333 | 3.94465  | 8.207512 | Unclassified | chr4:135004815-135052419  | 45.605  |
| Kbtbd7        | 0 | 0        | 0 | 167  | 2.783333 | 2.12595  | 16.05965 | Stalled      | chr14:79824317-79830843   | 4.527   |
| Rgs16         | 0 | 0        | 0 | 156  | 2.6      | 1.49829  | 5.805298 | Unclassified | chr1:155585482-155592598  | 5.117   |
| Sic6a9        | 0 | 0        | 0 | 240  | 4        | 1.78117  | 3.620998 | Unclassified | chr4:117505862-117541910  | 34.049  |
| 4930542N07Rik | 0 | 0        | 0 | 1    | 0.016667 | 0        | 1        | Unclassified | chrX:150914544-150919225  | 2.682   |
| Tbx6          | 0 | 0        | 0 | 476  | 7.933333 | 0.971292 | 0.354418 | Unclassified | chr7:133922996-133929062  | 4.067   |
| Kcnc3         | 0 | 0        | 0 | 151  | 2.516667 | 2.14801  | 16.74113 | Stalled      | chr7:51844255-51860121    | 13.867  |
| 4930538K18Rik | 0 | 0        | 0 | 41   | 0.683333 | 0.051129 | 2.30794  | Unclassified | chr4:118877659-118892822  | 13.164  |
| Tbx1          | 0 | 0        | 0 | 9    | 0.15     | 0.273468 | 1.37978  | Unclassified | chr16:18581805-18589062   | 5.258   |
| Tbx4          | 0 | 0        | 0 | 47   | 0.783333 | 0.047697 | 1.120413 | Unclassified | chr11:85701564-85729599   | 26.036  |
| Tbx3          | 0 | 0        | 0 | 23   | 0.383333 | 0.280724 | 0.810046 | Unclassified | chr5:120118677-120134610  | 13.934  |
| Tbx2          | 0 | 0        | 0 | 37   | 0.616667 | 0.446161 | 0.917573 | Unclassified | chr11:85644116-85655450   | 9.335   |
| Tbx15         | 0 | 0        | 0 | 95   | 1.583333 | 0.136535 | 1.575213 | Unclassified | chr3:99055682-99158183    | 100.502 |
| Ippk          | 0 | 0        | 0 | 665  | 11.08333 | 2.17414  | 34.64739 | Unclassified | chr13:49514679-49558359   | 41.681  |

|               |   |   |   |      |          |          |          |              |                           |         |
|---------------|---|---|---|------|----------|----------|----------|--------------|---------------------------|---------|
| Defb6         | 0 | 0 | 0 | 3    | 0.05     | 0        | 0.464238 | Unclassified | chr8:19223477-19228209    | 2.733   |
| Mpz           | 0 | 0 | 0 | 200  | 3.333333 | 0.273117 | 69.14676 | Stalled      | chr1:173078843-173091254  | 10.412  |
| Opzd1         | 0 | 0 | 0 | 59   | 0.983333 | 0.375841 | 0.755215 | Unclassified | chr4:131666640-131702401  | 33.762  |
| Mest          | 0 | 0 | 0 | 69   | 1.15     | 0.497019 | 1.436785 | Unclassified | chr6:30686062-30698457    | 10.396  |
| Met           | 0 | 0 | 0 | 98   | 1.633333 | 0.065454 | 1.611008 | Unclassified | chr6:17411956-17523980    | 110.025 |
| Mpp1          | 0 | 0 | 0 | 210  | 3.5      | 9.05684  | 7.633244 | Unclassified | chrX:72355071-72378288    | 21.218  |
| Mpo           | 0 | 0 | 0 | 24   | 0.4      | 0.090506 | 1.045532 | Unclassified | chr11:87605285-87617913   | 10.629  |
| Mesp1         | 0 | 0 | 0 | 9    | 0.15     | 0.458563 | 5        | Unclassified | chr7:86937127-86940476    | 1.35    |
| Mesp2         | 0 | 0 | 0 | 9    | 0.15     | 0.234818 | 1.81258  | Unclassified | chr7:86953612-86958317    | 2.706   |
| Nsun5         | 0 | 0 | 0 | 466  | 7.766667 | 11.0106  | 4.174961 | Unclassified | chr5:135843822-135852667  | 6.846   |
| Btbd1         | 0 | 0 | 0 | 476  | 7.933333 | 8.95571  | 21.41138 | Unclassified | chr7:88936959-88976317    | 37.359  |
| Lrrc58        | 0 | 0 | 0 | 516  | 8.6      | 23.5746  | 22.41396 | Unclassified | chr16:37866485-37888943   | 20.459  |
| Ccnb3         | 0 | 0 | 0 | 15   | 0.25     | 0.025329 | 0        | Unclassified | chrX:6556777-6620745      | 61.969  |
| Ace2          | 0 | 0 | 0 | 24   | 0.4      | 0.021564 | 0        | Unclassified | chrX:160575273-160626350  | 49.078  |
| Alms1         | 0 | 0 | 0 | 259  | 4.316667 | 1.93505  | 25.11026 | Stalled      | chr6:85535524-85652745    | 115.222 |
| Fndc7         | 0 | 0 | 0 | 104  | 1.733333 | 0.143719 | 0.26302  | Unclassified | chr3:108656595-108694926  | 36.332  |
| MsrB3         | 0 | 0 | 0 | 364  | 6.066667 | 1.81432  | 5.909478 | Unclassified | chr10:120218156-120338027 | 117.872 |
| Ndufb11       | 0 | 0 | 0 | 249  | 4.15     | 65.3893  | 24.82684 | Stalled      | chrX:20192451-20196690    | 2.24    |
| Aire          | 0 | 0 | 0 | 141  | 2.35     | 1.3085   | 5.476281 | Unclassified | chr10:77492775-77508325   | 13.551  |
| Plin2         | 0 | 0 | 0 | 62   | 1.033333 | 3.65979  | 13.40306 | Stalled      | chr4:86302468-86317963    | 13.496  |
| Ak1           | 0 | 0 | 0 | 21   | 0.35     | 0.195332 | 0        | Unclassified | chr2:32483023-32490572    | 5.55    |
| Aim1          | 0 | 0 | 0 | 572  | 9.533333 | 4.29227  | 1.988116 | Elongating   | chr10:43670112-43726652   | 54.541  |
| Fbxw19        | 0 | 0 | 0 | 13   | 0.216667 | 0.012372 | 0        | Unclassified | chr9:109381088-109400368  | 17.281  |
| Ifi205        | 0 | 0 | 0 | 4    | 0.066667 | 4.04872  | 0.862126 | Unclassified | chr1:175942128-175963886  | 19.759  |
| Chmp7         | 0 | 0 | 0 | 350  | 5.833333 | 14.8847  | 25.7948  | Unclassified | chr14:70116785-70134377   | 15.593  |
| Ormdl1        | 0 | 0 | 0 | 325  | 5.416667 | 2.86655  | 81.38506 | Stalled      | chr1:53351938-53367089    | 13.152  |
| Oscp1         | 0 | 0 | 0 | 217  | 3.616667 | 2.91772  | 17.97625 | Stalled      | chr4:125733808-125766578  | 30.771  |
| Npy1r         | 0 | 0 | 0 | 10   | 0.166667 | 0.017049 | 0.51154  | Unclassified | chr8:69219320-69230697    | 9.378   |
| Nkx6-3        | 0 | 0 | 0 | 10   | 0.166667 | 0.527326 | 0.43815  | Unclassified | chr8:24261742-24269420    | 5.679   |
| Olfr1303      | 0 | 0 | 0 | 1    | 0.016667 | 0        | 0        | Unclassified | chr2:111653944-111656881  | 0.938   |
| Tmem62        | 0 | 0 | 0 | 322  | 5.366667 | 3.46717  | 29.24323 | Stalled      | chr2:120800797-120833578  | 30.782  |
| Dcpp1         | 0 | 0 | 0 | 3    | 0.05     | 0        | 0        | Unclassified | chr17:24015842-24019820   | 1.979   |
| Polr2k        | 0 | 0 | 0 | 180  | 3        | 12.0682  | 32.36111 | Stalled      | chr15:36101771-36106767   | 2.997   |
| Pcbd1         | 0 | 0 | 0 | 57   | 0.95     | 0.332275 | 1.7251   | Unclassified | chr10:60550090-60557077   | 4.988   |
| Stac3         | 0 | 0 | 0 | 103  | 1.716667 | 0.673036 | 2.05803  | Elongating   | chr10:126936772-126945871 | 7.1     |
| Sod2          | 0 | 0 | 0 | 291  | 4.85     | 10.7683  | 24.0428  | Stalled      | chr17:13198704-13210985   | 10.282  |
| Atad5         | 0 | 0 | 0 | 671  | 11.18333 | 4.92695  | 10.52327 | Unclassified | chr11:79900901-79949293   | 46.393  |
| 2310021P13Rik | 0 | 0 | 0 | 545  | 9.083333 | 12.8441  | 7.808397 | Unclassified | chr14:21524773-21542840   | 16.068  |
| Sod1          | 0 | 0 | 0 | 524  | 8.733333 | 237.806  | 15.03094 | Unclassified | chr16:90218986-90226569   | 5.584   |
| Vkorc1        | 0 | 0 | 0 | 83   | 1.383333 | 8.39477  | 3.105181 | Unclassified | chr7:135036576-135041131  | 2.556   |
| Olfr1143      | 0 | 0 | 0 | 0    | 0        | 0.054249 | 0        | Unclassified | chr2:87640547-87643492    | 0.946   |
| Olfr478       | 0 | 0 | 0 | 2    | 0.033333 | 0        | 2        | Unclassified | chr7:115174910-115177855  | 0.946   |
| Gm216         | 0 | 0 | 0 | 22   | 0.366667 | 0.274335 | 0.513318 | Unclassified | chr1:74406681-74415895    | 7.215   |
| Zxdc          | 0 | 0 | 0 | 389  | 6.483333 | 5.16147  | 19.61501 | Unclassified | chr6:90317487-90353480    | 33.994  |
| Cebpg         | 0 | 0 | 0 | 378  | 6.3      | 6.13726  | 14.6728  | Unclassified | chr7:35831440-35843585    | 10.146  |
| Olfr1167      | 0 | 0 | 0 | 0    | 0        | 0        | 0        | Unclassified | chr2:87989141-87992240    | 1.1     |
| Fam46b        | 0 | 0 | 0 | 23   | 0.383333 | 0.386506 | 2.89606  | Unclassified | chr4:133034047-133043855  | 7.809   |
| Gm15114       | 0 | 0 | 0 | 0    | 0        | 0        | 0        | Unclassified | chrX:144921491-144955989  | 32.499  |
| Zcchc17       | 0 | 0 | 0 | 674  | 11.23333 | 20.2162  | 40.15486 | Unclassified | chr4:129993328-130039190  | 43.863  |
| Sftpc         | 0 | 0 | 0 | 8    | 0.133333 | 0.208005 | 0.299622 | Unclassified | chr14:70920750-70925888   | 3.139   |
| Fam126a       | 0 | 0 | 0 | 457  | 7.616667 | 5.36491  | 31.82925 | Stalled      | chr5:23466753-23538501    | 69.749  |
| Hes7          | 0 | 0 | 0 | 27   | 0.45     | 4.57346  | 0.151882 | Unclassified | chr11:68931954-68936761   | 2.808   |
| Gipc1         | 0 | 0 | 0 | 477  | 7.95     | 22.6561  | 9.533922 | Unclassified | chr8:86174576-86188688    | 12.113  |
| Vps4b         | 0 | 0 | 0 | 601  | 10.01667 | 10.6329  | 17.73432 | Unclassified | chr1:108667364-108695302  | 25.939  |
| Olfr611       | 0 | 0 | 0 | 0    | 0        | 0        | 0        | Unclassified | chr7:110665924-110668896  | 0.973   |
| Six2          | 0 | 0 | 0 | 10   | 0.166667 | 0.255354 | 1.797113 | Unclassified | chr17:86083607-86089594   | 3.988   |
| Six3          | 0 | 0 | 0 | 6    | 0.1      | 0.294364 | 0        | Unclassified | chr17:86018173-86025530   | 5.358   |
| Zc3h12b       | 0 | 0 | 0 | 77   | 1.283333 | 0.567393 | 9.283448 | Unclassified | chrX:92905016-93123309    | 216.294 |
| Six1          | 0 | 0 | 0 | 14   | 0.233333 | 0.233924 | 1.634979 | Unclassified | chr12:74142813-74149699   | 4.887   |
| Six6          | 0 | 0 | 0 | 8    | 0.133333 | 0.074424 | 1.491704 | Unclassified | chr12:74038931-74045886   | 4.956   |
| A630007B06Rik | 0 | 0 | 0 | 191  | 3.183333 | 1.38668  | 1.46525  | Unclassified | chr19:56865452-56890173   | 22.722  |
| Six4          | 0 | 0 | 0 | 19   | 0.316667 | 0.558804 | 0.428326 | Unclassified | chr12:74201245-74216232   | 12.988  |
| Lmod1         | 0 | 0 | 0 | 42   | 0.7      | 0.071527 | 1.053007 | Unclassified | chr1:137219389-137264642  | 43.254  |
| Tsga14        | 0 | 0 | 0 | 239  | 3.983333 | 1.06539  | 35.18956 | Stalled      | chr6:30603456-30645682    | 40.227  |
| Tmem2         | 0 | 0 | 0 | 254  | 4.233333 | 1.84851  | 19.13064 | Stalled      | chr19:21850831-21932817   | 79.987  |
| Gabbrp        | 0 | 0 | 0 | 22   | 0.366667 | 0.027352 | 1.152147 | Unclassified | chr11:33450780-33480957   | 28.178  |
| Oxtr          | 0 | 0 | 0 | 25   | 0.416667 | 0.070142 | 0.44324  | Unclassified | chr6:112423677-112441802  | 16.126  |
| Clspn         | 0 | 0 | 0 | 841  | 14.01667 | 10.5289  | 14.91595 | Unclassified | chr4:126232223-126271146  | 36.924  |
| Zscan20       | 0 | 0 | 0 | 320  | 5.333333 | 2.07167  | 9.782074 | Unclassified | chr4:128260782-128289342  | 26.561  |
| Tradd         | 0 | 0 | 0 | 289  | 4.816667 | 17.053   | 8.474398 | Unclassified | chr8:107782474-107790494  | 6.021   |
| P2rx7         | 0 | 0 | 0 | 170  | 2.833333 | 1.54019  | 5.89473  | Unclassified | chr5:123091919-123141441  | 47.523  |
| P2rx4         | 0 | 0 | 0 | 688  | 11.46667 | 6.70612  | 16.08784 | Unclassified | chr5:123155565-123179051  | 21.487  |
| 5430402E10Rik | 0 | 0 | 0 | 0    | 0        | 0        | 0        | Unclassified | chrX:75231629-75238906    | 5.278   |
| Fam171a1      | 0 | 0 | 0 | 118  | 1.966667 | 0.166928 | 4.026422 | Unclassified | chr2:3033659-3145081      | 109.423 |
| Ceacam20      | 0 | 0 | 0 | 21   | 0.35     | 0.033198 | 0.592336 | Unclassified | chr7:20548760-20576460    | 25.701  |
| Crhr1         | 0 | 0 | 0 | 89   | 1.483333 | 0.03695  | 0.326219 | Unclassified | chr11:103992195-104036832 | 42.638  |
| Crhr2         | 0 | 0 | 0 | 68   | 1.133333 | 0.014487 | 1.176309 | Unclassified | chr6:55040041-55084966    | 42.926  |
| Crip1         | 0 | 0 | 0 | 44   | 0.733333 | 22.5887  | 4.048333 | Unclassified | chr12:114388222-114392090 | 1.869   |
| Ropn1         | 0 | 0 | 0 | 29   | 0.483333 | 0.060741 | 0        | Unclassified | chr16:34649296-34678696   | 27.401  |
| Crk           | 0 | 0 | 0 | 1193 | 19.88333 | 13.9786  | 9.299025 | Unclassified | chr11:75490811-75519594   | 26.784  |
| Ick           | 0 | 0 | 0 | 209  | 3.483333 | 1.31789  | 5.199317 | Unclassified | chr9:77959044-78019914    | 58.871  |
| Atoh7         | 0 | 0 | 0 | 6    | 0.1      | 5.0403   | 5        | Unclassified | chr10:62560903-62563353   | 0.451   |
| Nsun7         | 0 | 0 | 0 | 58   | 0.966667 | 0.165589 | 9.35958  | Unclassified | chr5:66649363-66689255    | 37.893  |
| Dsnd2         | 0 | 0 | 0 | 51   | 0.85     | 1.06384  | 3.07564  | Unclassified | chr2:164309639-164318823  | 7.185   |
| Phyhipl       | 0 | 0 | 0 | 35   | 0.583333 | 0.071514 | 1.183757 | Unclassified | chr10:70020433-70064039   | 41.607  |
| Insc          | 0 | 0 | 0 | 117  | 1.95     | 0.016566 | 0.473963 | Unclassified | chr7:121887279-121993894  | 104.616 |

|               |   |   |   |     |          |          |          |              |                           |         |
|---------------|---|---|---|-----|----------|----------|----------|--------------|---------------------------|---------|
| D630042F21Rik | 0 | 0 | 0 | 8   | 0.133333 | 0.057952 | 0.531484 | Unclassified | chr6:129460574-129469245  | 6.672   |
| Nod1          | 0 | 0 | 0 | 152 | 2.533333 | 0.788083 | 11.79162 | Stalled      | chr6:54873935-54924606    | 48.672  |
| Rdh1          | 0 | 0 | 0 | 19  | 0.316667 | 0.034583 | 0.349986 | Unclassified | chr10:127194818-127205355 | 8.538   |
| Aadat         | 0 | 0 | 0 | 19  | 0.316667 | 0.251806 | 1.439828 | Unclassified | chr8:62982920-63024474    | 39.555  |
| Oprl1         | 0 | 0 | 0 | 17  | 0.283333 | 0.099654 | 0.990623 | Unclassified | chr2:181447748-181455677  | 5.93    |
| BC015286      | 0 | 0 | 0 | 12  | 0.2      | 0.026637 | 0.857959 | Unclassified | chr8:107353543-107362552  | 7.01    |
| Oprk1         | 0 | 0 | 0 | 9   | 0.15     | 0        | 0        | Unclassified | chr1:5576573-5592947      | 14.375  |
| Tnfrsf11b     | 0 | 0 | 0 | 16  | 0.266667 | 0        | 0.641723 | Unclassified | chr15:54082173-54112039   | 27.867  |
| Zbtb41        | 0 | 0 | 0 | 410 | 6.833333 | 1.00693  | 51.53981 | Stalled      | chr1:141316959-141349584  | 30.626  |
| Prr15         | 0 | 0 | 0 | 7   | 0.116667 | 0.825704 | 0.522673 | Unclassified | chr6:54275005-54280194    | 3.19    |
| BC020535      | 0 | 0 | 0 | 38  | 0.633333 | 0.041611 | 0.906962 | Unclassified | chr2:152889737-152907469  | 15.733  |
| Ido1          | 0 | 0 | 0 | 598 | 9.966667 | 10.3913  | 3.758028 | Unclassified | chr8:25694612-25709481    | 12.87   |
| Khdc1c        | 0 | 0 | 0 | 0   | 0        | 0.02319  | 0        | Unclassified | chr1:21356411-21359824    | 1.414   |
| V1rc16        | 0 | 0 | 0 | 1   | 0.016667 | 0        | 1        | Unclassified | chr6:57310460-57313372    | 0.913   |
| Parm1         | 0 | 0 | 0 | 441 | 7.35     | 10.4335  | 11.98306 | Stalled      | chr5:91944725-92053022    | 106.298 |
| Galnt7        | 0 | 0 | 0 | 775 | 12.91667 | 3.12203  | 19.45695 | Stalled      | chr8:60002622-60133852    | 129.231 |
| Olfr16        | 0 | 0 | 0 | 3   | 0.05     | 0        | 2        | Unclassified | chr1:174884898-174887948  | 1.051   |
| Pea15a        | 0 | 0 | 0 | 508 | 8.466667 | 6.91878  | 2.064668 | Elongating   | chr1:174126859-174138912  | 10.054  |
| Olfr1289      | 0 | 0 | 0 | 3   | 0.05     | 0.020165 | 2        | Unclassified | chr2:111321588-111324485  | 0.898   |
| V1rc15        | 0 | 0 | 0 | 9   | 0.15     | 0.027284 | 0        | Unclassified | chr6:66502176-66511702    | 7.527   |
| Ergic3        | 0 | 0 | 0 | 244 | 4.066667 | 47.3939  | 8.21608  | Unclassified | chr2:155831860-155844015  | 10.156  |
| 2310022A10Rik | 0 | 0 | 0 | 512 | 8.533333 | 10.3663  | 14.83233 | Unclassified | chr7:28336313-28367117    | 28.805  |
| Zfand1        | 0 | 0 | 0 | 309 | 5.15     | 3.37088  | 7.360271 | Unclassified | chr3:10339955-10353301    | 11.347  |
| Exosc3        | 0 | 0 | 0 | 324 | 5.4      | 52.6108  | 14.49606 | Unclassified | chr4:45329501-45335475    | 3.975   |
| Ttll12        | 0 | 0 | 0 | 409 | 6.816667 | 10.7918  | 9.565381 | Unclassified | chr15:83405523-83427587   | 20.065  |
| Syt12         | 0 | 0 | 0 | 63  | 1.05     | 0.185768 | 1.028038 | Unclassified | chr19:4445907-4479143     | 31.237  |
| V1rc10        | 0 | 0 | 0 | 0   | 0        | 0.028132 | 0        | Unclassified | chr6:66679385-66682294    | 0.91    |
| V1rc11        | 0 | 0 | 0 | 0   | 0        | 0.06964  | 0        | Unclassified | chr6:66665965-66668883    | 0.919   |
| V1rc13        | 0 | 0 | 0 | 0   | 0        | 0        | 0        | Unclassified | chr6:66726215-66729124    | 0.91    |
| V1rc14        | 0 | 0 | 0 | 0   | 0        | 0.013961 | 0        | Unclassified | chr6:66561644-66564562    | 0.919   |
| Zswim4        | 0 | 0 | 0 | 480 | 8        | 5.40818  | 5.21791  | Unclassified | chr8:86734840-86762941    | 26.102  |
| Fam195a       | 0 | 0 | 0 | 103 | 1.716667 | 5.96795  | 5.280006 | Unclassified | chr17:26000642-26007683   | 5.042   |
| Rpa3          | 0 | 0 | 0 | 232 | 3.866667 | 20.608   | 31.40451 | Stalled      | chr6:8205936-8211141      | 3.206   |
| A930018P22Rik | 0 | 0 | 0 | 15  | 0.25     | 3.12845  | 1.769632 | Unclassified | chr2:103960925-103964903  | 1.979   |
| Pdyn          | 0 | 0 | 0 | 7   | 0.116667 | 0        | 0.356952 | Unclassified | chr2:129513736-129517604  | 1.869   |
| 8030462N17Rik | 0 | 0 | 0 | 815 | 13.58333 | 3.41146  | 29.75363 | Unclassified | chr18:77872019-77954749   | 80.731  |
| Dsg1b         | 0 | 0 | 0 | 5   | 0.083333 | 0.009506 | 0        | Unclassified | chr18:20533335-20568242   | 32.908  |
| Rasl11b       | 0 | 0 | 0 | 103 | 1.716667 | 1.1236   | 15.25675 | Stalled      | chr5:74589350-74595502    | 4.153   |
| Spata6        | 0 | 0 | 0 | 420 | 7        | 3.6534   | 21.61961 | Stalled      | chr4:111390614-111501745  | 109.132 |
| Armcx2        | 0 | 0 | 0 | 84  | 1.4      | 4.73176  | 4.071156 | Unclassified | chrX:131338682-131345760  | 5.079   |
| Rps27l        | 0 | 0 | 0 | 359 | 5.983333 | 57.1575  | 32.31327 | Stalled      | chr9:66791924-66797315    | 3.392   |
| 6330407J23Rik | 0 | 0 | 0 | 36  | 0.6      | 0.09419  | 1.246868 | Unclassified | chr10:28861801-28919434   | 55.634  |
| Rtcd1         | 0 | 0 | 0 | 330 | 5.5      | 19.3121  | 12.46751 | Unclassified | chr3:116191881-116213093  | 19.213  |
| 3632451O06Rik | 0 | 0 | 0 | 74  | 1.233333 | 0.018656 | 0.578887 | Unclassified | chr14:50301693-50405042   | 101.35  |
| Mki67ip       | 0 | 0 | 0 | 545 | 9.083333 | 19.0119  | 5.063281 | Unclassified | chr1:120216419-120230408  | 11.99   |
| Cep120        | 0 | 0 | 0 | 864 | 14.4     | 6.13971  | 12.25218 | Unclassified | chr18:53841376-53906201   | 62.826  |
| Arrb2         | 0 | 0 | 0 | 194 | 3.233333 | 12.1995  | 13.92944 | Stalled      | chr11:70244154-70254176   | 8.023   |
| Ugt2b38       | 0 | 0 | 0 | 3   | 0.05     | 0        | 0        | Unclassified | chr5:87838966-87855228    | 14.263  |
| Zfp874        | 0 | 0 | 0 | 25  | 0.416667 | 1.26985  | 5.51176  | Unclassified | chr13:67541367-67554560   | 11.194  |
| Zfp58         | 0 | 0 | 0 | 126 | 2.1      | 4.43585  | 20.1362  | Stalled      | chr13:67591102-67603458   | 10.357  |
| Zfp458        | 0 | 0 | 0 | 82  | 1.366667 | 0.126337 | 18.2705  | Stalled      | chr13:67355853-67372004   | 14.152  |
| Gm949         | 0 | 0 | 0 | 13  | 0.216667 | 0.00569  | 0.487377 | Unclassified | chr18:47079468-47093876   | 12.409  |
| Vmn2r65       | 0 | 0 | 0 | 7   | 0.116667 | 0        | 0        | Unclassified | chr7:92088678-92114519    | 23.842  |
| Mgl2          | 0 | 0 | 0 | 7   | 0.116667 | 0.057861 | 1.822028 | Unclassified | chr11:69941858-69951044   | 7.187   |
| Sic16a11      | 0 | 0 | 0 | 57  | 0.95     | 0.496101 | 0.321229 | Unclassified | chr11:70025411-70029916   | 2.506   |
| AA792892      | 0 | 0 | 0 | 2   | 0.033333 | 0.036073 | 0        | Unclassified | chr5:94804364-94813359    | 6.996   |
| Ghitm         | 0 | 0 | 0 | 550 | 9.166667 | 31.1373  | 23.05335 | Unclassified | chr14:37934003-37950452   | 14.45   |
| Ypel3         | 0 | 0 | 0 | 150 | 2.5      | 29.1234  | 6.294798 | Unclassified | chr7:133918488-133924028  | 3.541   |
| Klhl11        | 0 | 0 | 0 | 318 | 5.3      | 5.64909  | 23.58367 | Unclassified | chr11:100323925-100336096 | 10.172  |
| Plekhh3       | 0 | 0 | 0 | 46  | 0.766667 | 1.01428  | 4.41629  | Unclassified | chr11:101023992-101034616 | 8.625   |
| Gm6531        | 0 | 0 | 0 | 16  | 0.266667 | 0.626111 | 0.614243 | Unclassified | chr8:87673822-87697521    | 21.7    |
| Muc19         | 0 | 0 | 0 | 60  | 1        | 0        | 0.621487 | Unclassified | chr15:91666756-91764986   | 96.231  |
| Emilin2       | 0 | 0 | 0 | 154 | 2.566667 | 0.508064 | 1.718342 | Unclassified | chr17:71601515-71662305   | 58.791  |
| 2900006K08Rik | 0 | 0 | 0 | 315 | 5.25     | 1.07835  | 8.232898 | Unclassified | chr12:85748017-85774730   | 24.714  |
| Zfp280c       | 0 | 0 | 0 | 189 | 3.15     | 2.03042  | 0.424037 | Unclassified | chrX:45894803-45947310    | 50.508  |
| Thns1         | 0 | 0 | 0 | 137 | 2.283333 | 1.05233  | 43.50424 | Stalled      | chr2:21125350-21136636    | 9.287   |
| 2700097O09Rik | 0 | 0 | 0 | 307 | 5.116667 | 4.18452  | 29.92274 | Stalled      | chr12:56146647-56183097   | 34.451  |
| 6430573F11Rik | 0 | 0 | 0 | 16  | 0.266667 | 0.063204 | 0        | Unclassified | chr8:37550244-37576067    | 23.824  |
| Tas2r122      | 0 | 0 | 0 | 1   | 0.016667 | 0.027562 | 0        | Unclassified | chr6:132661016-132663946  | 0.931   |
| Tmem204       | 0 | 0 | 0 | 299 | 4.983333 | 0.821082 | 1.991194 | Elongating   | chr17:25194646-25220059   | 23.414  |
| Sic12a9       | 0 | 0 | 0 | 525 | 8.75     | 9.85919  | 6.450162 | Unclassified | chr5:137755786-137776810  | 19.025  |
| Fstl1         | 0 | 0 | 0 | 59  | 0.983333 | 0.1456   | 1.545781 | Unclassified | chr16:37775140-37836602   | 59.463  |
| Olfr108       | 0 | 0 | 0 | 2   | 0.033333 | 0.069142 | 1        | Unclassified | chr17:37580467-37583430   | 0.964   |
| Olfr1202      | 0 | 0 | 0 | 0   | 0        | 0.027562 | 0        | Unclassified | chr2:88655329-88658259    | 0.931   |
| Olfr1204      | 0 | 0 | 0 | 0   | 0        | 0        | 0        | Unclassified | chr2:88690108-88693038    | 0.931   |
| Olfr1137      | 0 | 0 | 0 | 0   | 0        | 0        | 0        | Unclassified | chr2:87551128-87554061    | 0.934   |
| Kdelr2        | 0 | 0 | 0 | 875 | 14.58333 | 18.319   | 6.794075 | Unclassified | chr5:144163498-144182951  | 17.454  |
| Olfr1152      | 0 | 0 | 0 | 0   | 0        | 0.027473 | 0        | Unclassified | chr2:87706149-87709082    | 0.934   |
| Olfr165       | 0 | 0 | 0 | 2   | 0.033333 | 0.054422 | 1        | Unclassified | chr16:19407168-19410110   | 0.943   |
| Olfr1388      | 0 | 0 | 0 | 2   | 0.033333 | 0.068852 | 1        | Unclassified | chr11:49255354-49258290   | 0.937   |
| BC023744      | 0 | 0 | 0 | 77  | 1.283333 | 0.388677 | 9.724616 | Unclassified | chr5:117767274-117805015  | 35.742  |
| Pσμα3         | 0 | 0 | 0 | 619 | 10.31667 | 17.2897  | 11.9626  | Unclassified | chr12:72073609-72095908   | 20.3    |
| Sirt1         | 0 | 0 | 0 | 524 | 8.733333 | 3.15348  | 18.34331 | Unclassified | chr10:62781754-62803743   | 19.99   |
| Zer1          | 0 | 0 | 0 | 607 | 10.11667 | 5.03475  | 16.438   | Unclassified | chr2:29952802-29981974    | 27.173  |
| Elf4e3        | 0 | 0 | 0 | 254 | 4.233333 | 5.6195   | 8.908492 | Unclassified | chr6:99575130-99618765    | 41.636  |
| Sic29a4       | 0 | 0 | 0 | 56  | 0.933333 | 0.344393 | 3.011337 | Unclassified | chr5:143176054-143198443  | 20.39   |

|               |   |   |   |      |          |          |          |              |                          |         |
|---------------|---|---|---|------|----------|----------|----------|--------------|--------------------------|---------|
| Naa16         | 0 | 0 | 0 | 771  | 12.85    | 2.71866  | 34.88084 | Unclassified | chr14:79734313-79792475  | 56.163  |
| Snrk          | 0 | 0 | 0 | 368  | 6.133333 | 4.39512  | 14.83875 | Stalled      | chr9:122024383-122078818 | 52.436  |
| Haus1         | 0 | 0 | 0 | 305  | 5.083333 | 8.62684  | 15.38343 | Unclassified | chr18:77996305-78008519  | 10.215  |
| St8sia5       | 0 | 0 | 0 | 88   | 1.466667 | 0.027355 | 3.253489 | Unclassified | chr18:77422585-77494188  | 69.604  |
| A430107013Rik | 0 | 0 | 0 | 231  | 3.85     | 0.750904 | 3.278817 | Unclassified | chr6:21933909-22205606   | 269.698 |
| Gm4956        | 0 | 0 | 0 | 20   | 0.333333 | 0.066984 | 0.401357 | Unclassified | chr1:21275326-21290393   | 13.068  |
| Phyhd1        | 0 | 0 | 0 | 115  | 1.916667 | 1.29895  | 3.405878 | Unclassified | chr2:30120068-30137668   | 15.601  |
| Trpc4         | 0 | 0 | 0 | 86   | 1.433333 | 0.014981 | 0.657653 | Unclassified | chr3:53958025-54122389   | 162.365 |
| Chst7         | 0 | 0 | 0 | 110  | 1.833333 | 4.10375  | 3.057284 | Unclassified | chrX:19634695-19674646   | 37.952  |
| Csrp2bp       | 0 | 0 | 0 | 792  | 13.2     | 0        | 20.66342 | Unclassified | chr2:144192770-144233411 | 38.642  |
| Wbp11         | 0 | 0 | 0 | 822  | 13.7     | 43.4266  | 9.744683 | Unclassified | chr6:136762175-136778737 | 14.563  |
| Trpc3         | 0 | 0 | 0 | 62   | 1.033333 | 0.083172 | 3.386738 | Unclassified | chr3:36519403-36591089   | 69.687  |
| Olfr703       | 0 | 0 | 0 | 4    | 0.066667 | 0.026701 | 2        | Unclassified | chr7:113986126-113989086 | 0.961   |
| Rhobtb3       | 0 | 0 | 0 | 52   | 0.866667 | 0.347788 | 3.046372 | Unclassified | chr13:76006984-76083272  | 74.289  |
| Tpbbp         | 0 | 0 | 0 | 3    | 0.05     | 0        | 0.718627 | Unclassified | chr13:61002655-61008208  | 3.554   |
| Slc19a2       | 0 | 0 | 0 | 387  | 6.45     | 3.868    | 39.28253 | Stalled      | chr1:166177185-166195499 | 16.315  |
| Tex13a        | 0 | 0 | 0 | 1    | 0.016667 | 0        | 0        | Unclassified | chrX:134742703-134746119 | 1.417   |
| Tmem63c       | 0 | 0 | 0 | 107  | 1.783333 | 0        | 1.51941  | Unclassified | chr12:88365513-88430989  | 63.477  |
| Adam1a        | 0 | 0 | 0 | 82   | 1.366667 | 0.478252 | 1.531701 | Elongating   | chr5:121968612-121973704 | 3.093   |
| 4930449I24Rik | 0 | 0 | 0 | 1    | 0.016667 | 0        | 0        | Unclassified | chr5:147311974-147316759 | 2.786   |
| Pvalb         | 0 | 0 | 0 | 31   | 0.516667 | 0.431042 | 0.325054 | Unclassified | chr15:78021547-78036586  | 13.04   |
| Pura          | 0 | 0 | 0 | 705  | 11.75    | 26.6944  | 4.294074 | Unclassified | chr18:36438815-36447896  | 7.082   |
| Purb          | 0 | 0 | 0 | 351  | 5.85     | 60.4238  | 3.270593 | Unclassified | chr11:6374784-6377920    | 1.137   |
| Gdf5          | 0 | 0 | 0 | 6    | 0.1      | 0.049869 | 1.539064 | Unclassified | chr2:155766762-155773100 | 4.339   |
| Abcd3         | 0 | 0 | 0 | 269  | 4.483333 | 3.72485  | 32.46709 | Stalled      | chr3:121461827-121520133 | 56.307  |
| E430018J23Rik | 0 | 0 | 0 | 138  | 2.3      | 6.18147  | 5.685312 | Unclassified | chr7:134534350-134539135 | 2.786   |
| Olfr1305      | 0 | 0 | 0 | 0    | 0        | 0.150138 | 0        | Unclassified | chr2:111713071-111716010 | 0.94    |
| Zcchc5        | 0 | 0 | 0 | 4    | 0.066667 | 0.013047 | 0        | Unclassified | chrX:104032420-104037982 | 3.563   |
| Bbs12         | 0 | 0 | 0 | 129  | 2.15     | 0.689786 | 11.04985 | Stalled      | chr3:37209475-37220373   | 8.899   |
| Cilp          | 0 | 0 | 0 | 33   | 0.55     | 0.043205 | 0.664425 | Unclassified | chr9:65110986-65128412   | 15.427  |
| Olfr1030      | 0 | 0 | 0 | 4    | 0.066667 | 0.040177 | 4        | Unclassified | chr2:85821998-85824955   | 0.958   |
| Gpr174        | 0 | 0 | 0 | 182  | 3.033333 | 1.55342  | 2.662616 | Unclassified | chrX:104449366-104490646 | 39.281  |
| A630033H20Rik | 0 | 0 | 0 | 146  | 2.433333 | 1.17241  | 0.605757 | Unclassified | chrX:104342265-104369000 | 24.736  |
| 1700003M02Rik | 0 | 0 | 0 | 43   | 0.716667 | 0.311889 | 3.22303  | Unclassified | chr4:34635823-34679444   | 41.622  |
| Rnf208        | 0 | 0 | 0 | 39   | 0.65     | 0.576879 | 0.120927 | Unclassified | chr2:25096448-25099781   | 1.334   |
| Ctsm          | 0 | 0 | 0 | 3    | 0.05     | 0.025668 | 0.814712 | Unclassified | chr13:61637803-61645199  | 5.397   |
| LOC100039801  | 0 | 0 | 0 | 1    | 0.016667 | 0        | 0        | Unclassified | chr8:48905496-48908159   | 0.664   |
| Arrdc4        | 0 | 0 | 0 | 21   | 0.35     | 0.390953 | 3.710633 | Unclassified | chr7:75881879-75896124   | 12.246  |
| Cdc42ep3      | 0 | 0 | 0 | 128  | 2.133333 | 2.24791  | 16.85215 | Stalled      | chr17:79733364-79756431  | 21.068  |
| 1700012B09Rik | 0 | 0 | 0 | 27   | 0.45     | 0.112589 | 1.39922  | Unclassified | chr9:14562639-14577474   | 12.836  |
| 1700007K13Rik | 0 | 0 | 0 | 14   | 0.233333 | 0.408353 | 0.539554 | Unclassified | chr2:28317520-28323844   | 4.325   |
| Psmd6         | 0 | 0 | 0 | 277  | 4.616667 | 40.0431  | 9.514792 | Unclassified | chr14:14944698-14955418  | 8.721   |
| Nhedc1        | 0 | 0 | 0 | 64   | 1.066667 | 0.085633 | 0        | Unclassified | chr3:135009000-135060791 | 49.792  |
| Usp16         | 0 | 0 | 0 | 892  | 14.86667 | 11.2397  | 14.67772 | Unclassified | chr16:87453229-87483756  | 28.528  |
| Crot          | 0 | 0 | 0 | 262  | 4.366667 | 2.50997  | 40.2659  | Stalled      | chr5:8966047-8999146     | 31.1    |
| Pi16          | 0 | 0 | 0 | 39   | 0.65     | 0.045671 | 0.200391 | Unclassified | chr17:29453826-29465847  | 10.022  |
| Slco6c1       | 0 | 0 | 0 | 21   | 0.35     | 0        | 0        | Unclassified | chr1:98956025-99026880   | 68.856  |
| Olfr1189      | 0 | 0 | 0 | 1    | 0.016667 | 0.027831 | 1        | Unclassified | chr2:88429962-88432883   | 0.922   |
| Klk8          | 0 | 0 | 0 | 12   | 0.2      | 0.436259 | 2.142157 | Unclassified | chr7:51050946-51059192   | 6.247   |
| Shkbp1        | 0 | 0 | 0 | 231  | 3.85     | 15.255   | 9.536423 | Unclassified | chr7:28127151-28143027   | 13.877  |
| Zgpl1         | 0 | 0 | 0 | 123  | 2.05     | 0.558335 | 4.150794 | Unclassified | chr9:20866836-20873537   | 4.702   |
| Tubgcp3       | 0 | 0 | 0 | 1147 | 19.11667 | 8.86344  | 13.60263 | Unclassified | chr8:12614276-12674100   | 57.825  |
| Akap9         | 0 | 0 | 0 | 1050 | 17.5     | 4.047    | 19.87067 | Unclassified | chr5:3926185-4080204     | 152.02  |
| Ensa          | 0 | 0 | 0 | 453  | 7.55     | 44.1763  | 7.955756 | Unclassified | chr3:95426901-95436039   | 7.139   |
| Arl5b         | 0 | 0 | 0 | 372  | 6.2      | 1.16748  | 62.77702 | Stalled      | chr2:14974988-15000818   | 23.831  |
| 9230104L09Rik | 0 | 0 | 0 | 6    | 0.1      | 0.077911 | 0.51784  | Unclassified | chr2:148672449-148678670 | 4.222   |
| Gm14085       | 0 | 0 | 0 | 27   | 0.45     | 2.15603  | 0        | Unclassified | chr2:122308676-122353776 | 43.101  |
| 2310079N02Rik | 0 | 0 | 0 | 158  | 2.633333 | 7.58492  | 8.999114 | Unclassified | chr8:128256102-128272134 | 14.033  |
| Gde1          | 0 | 0 | 0 | 339  | 5.65     | 13.5849  | 11.94643 | Unclassified | chr7:125832071-125851252 | 17.182  |
| 4930588N13Rik | 0 | 0 | 0 | 38   | 0.633333 | 0.386952 | 0.453842 | Unclassified | chr5:150240280-150273194 | 30.915  |
| 5430433E21Rik | 0 | 0 | 0 | 17   | 0.283333 | 0.56549  | 3.629816 | Unclassified | chr9:65236490-65241459   | 2.97    |
| Braf          | 0 | 0 | 0 | 807  | 13.45    | 2.69491  | 13.022   | Unclassified | chr6:39553236-39677462   | 122.227 |
| Lrrc4         | 0 | 0 | 0 | 178  | 2.966667 | 0        | 1.316896 | Elongating   | chr6:28778125-28783747   | 3.623   |
| Lcn3          | 0 | 0 | 0 | 5    | 0.083333 | 0        | 0.338041 | Unclassified | chr2:25619088-25623619   | 2.532   |
| Lcn4          | 0 | 0 | 0 | 5    | 0.083333 | 0.033117 | 1.132321 | Unclassified | chr2:26523193-26528802   | 3.61    |
| Ldb2          | 0 | 0 | 0 | 228  | 3.8      | 0.025787 | 0.591006 | Unclassified | chr5:44863371-45192946   | 327.576 |
| Bgn           | 0 | 0 | 0 | 14   | 0.233333 | 0.016094 | 0.485045 | Unclassified | chrX:70726973-70741275   | 12.303  |
| Ano6          | 0 | 0 | 0 | 1123 | 18.71667 | 4.95754  | 32.10385 | Unclassified | chr15:95619273-95805182  | 183.91  |
| Bhmt          | 0 | 0 | 0 | 20   | 0.333333 | 0.022384 | 0.511179 | Unclassified | chr13:94386845-94409713  | 20.869  |
| Ncald         | 0 | 0 | 0 | 337  | 5.616667 | 0.163206 | 1.12019  | Unclassified | chr15:37295929-37724183  | 426.255 |
| Ammecr1       | 0 | 0 | 0 | 336  | 5.6      | 2.20595  | 36.59903 | Stalled      | chrX:139288016-139403271 | 113.256 |
| Ii17b         | 0 | 0 | 0 | 17   | 0.283333 | 0.092604 | 0.461933 | Unclassified | chr18:61845588-61852191  | 4.604   |
| Mbl1          | 0 | 0 | 0 | 12   | 0.2      | 0.083313 | 1.44502  | Unclassified | chr14:41962744-41972248  | 7.505   |
| Mbd2          | 0 | 0 | 0 | 1290 | 21.5     | 34.7317  | 11.48633 | Unclassified | chr18:70725945-70785785  | 57.841  |
| Guca1b        | 0 | 0 | 0 | 47   | 0.783333 | 0.330801 | 2.100064 | Unclassified | chr17:47520341-47529916  | 7.576   |
| Acaca         | 0 | 0 | 0 | 1396 | 23.26667 | 5.23413  | 0.906761 | Unclassified | chr11:84006939-84215153  | 206.215 |
| Jph1          | 0 | 0 | 0 | 54   | 0.9      | 0.608074 | 2.678675 | Unclassified | chr1:16987544-17089879   | 100.336 |
| Abcg3         | 0 | 0 | 0 | 83   | 1.383333 | 0.396951 | 11.47479 | Stalled      | chr5:105364075-105413736 | 47.662  |
| Rpp40         | 0 | 0 | 0 | 220  | 3.666667 | 2.46383  | 17.67621 | Stalled      | chr13:35986972-36000216  | 11.245  |
| C85627        | 0 | 0 | 0 | 11   | 0.183333 | 0.008437 | 0        | Unclassified | chr9:109579247-109607214 | 25.968  |
| Rnf133        | 0 | 0 | 0 | 0    | 0        | 0.058791 | 0        | Unclassified | chr6:23598868-23602305   | 1.438   |
| Gyg           | 0 | 0 | 0 | 271  | 4.516667 | 5.4393   | 16.01125 | Stalled      | chr3:20021969-20056995   | 33.027  |
| V1rd3         | 0 | 0 | 0 | 4    | 0.066667 | 0.020987 | 0.454446 | Unclassified | chr7:5146517-5150349     | 1.833   |
| V1rd4         | 0 | 0 | 0 | 2    | 0.033333 | 0.044148 | 0        | Unclassified | chr7:5360491-5366747     | 4.257   |
| Syncrip       | 0 | 0 | 0 | 1155 | 19.25    | 35.7726  | 10.26851 | Unclassified | chr9:88344575-88379235   | 32.661  |
| V1rd14        | 0 | 0 | 0 | 0    | 0        | 0        | 0        | Unclassified | chr7:23195249-23199685   | 2.437   |



|               |   |   |   |     |          |          |          |              |                           |         |
|---------------|---|---|---|-----|----------|----------|----------|--------------|---------------------------|---------|
| V1rd9         | 0 | 0 | 0 | 2   | 0.033333 | 0        | 2        | Unclassified | chr7:24441334-24445682    | 2.349   |
| V1rd6         | 0 | 0 | 0 | 4   | 0.066667 | 0        | 4        | Unclassified | chr7:59593352-5964612     | 3.261   |
| Glb112        | 0 | 0 | 0 | 56  | 0.933333 | 0.010431 | 0        | Unclassified | chr9:26570628-26616002    | 43.375  |
| Adamts3       | 0 | 0 | 0 | 123 | 2.05     | 0.19619  | 2.548779 | Unclassified | chr5:90105945-90314431    | 206.487 |
| Fdx1          | 0 | 0 | 0 | 210 | 3.5      | 8.21426  | 21.37906 | Stalled      | chr9:51751411-51773638    | 20.228  |
| Vat1          | 0 | 0 | 0 | 299 | 4.983333 | 10.0991  | 0.488418 | Unclassified | chr11:101320061-101329513 | 7.453   |
| Gm4769        | 0 | 0 | 0 | 12  | 0.2      | 0.397644 | 3.873028 | Unclassified | chr17:22281325-22304944   | 21.62   |
| Ecsit         | 0 | 0 | 0 | 305 | 5.083333 | 12.9169  | 9.716755 | Unclassified | chr9:21876689-21891826    | 13.138  |
| Spag1         | 0 | 0 | 0 | 386 | 6.433333 | 1.43299  | 9.959181 | Unclassified | chr15:36107284-36164932   | 55.649  |
| Ugt2b35       | 0 | 0 | 0 | 5   | 0.083333 | 0        | 0        | Unclassified | chr5:87427884-87442299    | 12.416  |
| Tpsg1         | 0 | 0 | 0 | 19  | 0.316667 | 0.011565 | 0.171058 | Unclassified | chr17:25505497-25511385   | 3.889   |
| Trpc7         | 0 | 0 | 0 | 154 | 2.566667 | 0.034545 | 0.442586 | Unclassified | chr13:56874468-56998949   | 122.482 |
| Fabp2         | 0 | 0 | 0 | 1   | 0.016667 | 0        | 0        | Unclassified | chr3:122596309-122602424  | 4.116   |
| Dmrt2         | 0 | 0 | 0 | 15  | 0.25     | 0.603098 | 6.504311 | Unclassified | chr19:25744900-25753481   | 6.582   |
| Ldlrad1       | 0 | 0 | 0 | 59  | 0.983333 | 0.027067 | 4.113051 | Unclassified | chr4:106879784-106890519  | 8.736   |
| Fabp3         | 0 | 0 | 0 | 73  | 1.216667 | 0.329827 | 0.606041 | Unclassified | chr4:129984021-129992707  | 6.687   |
| F9            | 0 | 0 | 0 | 23  | 0.383333 | 0.243853 | 0.627298 | Unclassified | chrX:57250640-57283935    | 31.296  |
| F8a           | 0 | 0 | 0 | 212 | 3.533333 | 6.41759  | 25.76378 | Stalled      | chrX:70471644-70476134    | 2.491   |
| Rimklb        | 0 | 0 | 0 | 35  | 0.583333 | 0.146764 | 3.983734 | Unclassified | chr6:122403626-122438323  | 32.698  |
| Mfsd5         | 0 | 0 | 0 | 412 | 6.866667 | 15.6679  | 9.932039 | Unclassified | chr15:102107886-102112175 | 2.29    |
| Nmb           | 0 | 0 | 0 | 89  | 1.483333 | 4.89449  | 2.070441 | Elongating   | chr7:88047114-88051957    | 2.844   |
| Zfp706        | 0 | 0 | 0 | 819 | 13.65    | 18.1276  | 19.16353 | Unclassified | chr15:36926783-36939157   | 10.375  |
| 4930504013Rik | 0 | 0 | 0 | 3   | 0.05     | 0        | 0        | Unclassified | chr11:58259650-58268425   | 6.776   |
| Fam122a       | 0 | 0 | 0 | 424 | 7.066667 | 17.3737  | 32.69027 | Unclassified | chr19:24550268-24553964   | 1.697   |
| Rbm42         | 0 | 0 | 0 | 497 | 8.283333 | 48.111   | 10.09215 | Unclassified | chr7:31426013-31437247    | 9.235   |
| Agr3          | 0 | 0 | 0 | 27  | 0.45     | 0.034314 | 0        | Unclassified | chr12:36650207-36676317   | 24.111  |
| Rnf146        | 0 | 0 | 0 | 514 | 8.566667 | 6.35531  | 30.76419 | Unclassified | chr10:29063981-29084248   | 18.268  |
| Rab44         | 0 | 0 | 0 | 34  | 0.566667 | 0.08742  | 0        | Unclassified | chr17:29270000-29285921   | 13.922  |
| Bcor11        | 0 | 0 | 0 | 251 | 4.183333 | 0.832741 | 4.388422 | Unclassified | chrX:45692534-45759905    | 65.372  |
| Tspan2        | 0 | 0 | 0 | 305 | 5.083333 | 2.12322  | 6.187681 | Unclassified | chr3:102536692-102576215  | 37.524  |
| Degs1         | 0 | 0 | 0 | 488 | 8.133333 | 9.84636  | 10.21006 | Unclassified | chr1:184205900-184214890  | 6.991   |
| A2m           | 0 | 0 | 0 | 26  | 0.433333 | 0.016463 | 0.627238 | Unclassified | chr6:121584190-121629256  | 43.067  |
| Gm884         | 0 | 0 | 0 | 52  | 0.866667 | 0.026584 | 0        | Unclassified | chr11:103395890-103478053 | 80.164  |
| Fpr-rs6       | 0 | 0 | 0 | 0   | 0        | 0        | 0        | Unclassified | chr17:20319041-20322061   | 1.021   |
| Zdhhc11       | 0 | 0 | 0 | 66  | 1.1      | 0        | 2.647472 | Unclassified | chr13:74099309-74130288   | 28.98   |
| 4933421107Rik | 0 | 0 | 0 | 7   | 0.116667 | 0.028004 | 3        | Unclassified | chr7:49700831-49705450    | 2.62    |
| 2700094K13Rik | 0 | 0 | 0 | 403 | 6.716667 | 95.6102  | 11.64962 | Unclassified | chr2:84509377-84512865    | 1.489   |
| Strn          | 0 | 0 | 0 | 662 | 11.03333 | 4.23884  | 78.11667 | Stalled      | chr17:79053303-79137900   | 82.598  |
| Ctgf          | 0 | 0 | 0 | 5   | 0.083333 | 0.213428 | 2.074645 | Unclassified | chr10:24313247-24318488   | 3.242   |
| Upp2          | 0 | 0 | 0 | 25  | 0.416667 | 0.023632 | 0.589638 | Unclassified | chr2:58605595-58643079    | 35.485  |
| Gm4297        | 0 | 0 | 0 | 0   | 0        | 0        | 0        | Unclassified | chrX:24129375-24154021    | 22.647  |
| Smc2          | 0 | 0 | 0 | 727 | 12.11667 | 11.3606  | 18.37782 | Unclassified | chr4:52450120-52501131    | 49.012  |
| Elov11        | 0 | 0 | 0 | 769 | 12.81667 | 26.4422  | 3.452735 | Unclassified | chr4:118098697-118105521  | 4.825   |
| Adi1          | 0 | 0 | 0 | 169 | 2.816667 | 8.67983  | 11.94512 | Stalled      | chr12:29358071-29367039   | 6.969   |
| Elov12        | 0 | 0 | 0 | 53  | 0.883333 | 0.036742 | 2.775927 | Unclassified | chr13:41277750-41317772   | 38.023  |
| AI316807      | 0 | 0 | 0 | 361 | 6.016667 | 3.32628  | 46.92302 | Stalled      | chr8:23573086-23589351    | 14.266  |
| 4930443G12Rik | 0 | 0 | 0 | 31  | 0.516667 | 0.016666 | 2.297454 | Unclassified | chr3:108881416-108919500  | 36.085  |
| Rhbd13        | 0 | 0 | 0 | 154 | 2.566667 | 0.28694  | 3.982954 | Unclassified | chr11:80112413-80169488   | 55.076  |
| Atxn7         | 0 | 0 | 0 | 939 | 15.65    | 3.9153   | 17.5866  | Unclassified | chr14:14843004-14939815   | 94.812  |
| Efr3a         | 0 | 0 | 0 | 473 | 7.883333 | 5.83666  | 35.44403 | Stalled      | chr15:65616602-65705374   | 86.773  |
| A21d1         | 0 | 0 | 0 | 394 | 6.566667 | 7.32327  | 12.26809 | Unclassified | chr14:123290081-123314387 | 22.307  |
| Haus5         | 0 | 0 | 0 | 465 | 7.75     | 11.0609  | 4.875246 | Unclassified | chr7:31438727-31452013    | 11.287  |
| Lingo3        | 0 | 0 | 0 | 51  | 0.85     | 0.06341  | 0.536559 | Unclassified | chr10:80295548-80308784   | 11.237  |
| Mex3d         | 0 | 0 | 0 | 175 | 2.916667 | 4.97545  | 10.22224 | Stalled      | chr10:79843099-79852396   | 7.298   |
| Prmt10        | 0 | 0 | 0 | 319 | 5.316667 | 5.29866  | 24.30804 | Stalled      | chr8:80071295-80105237    | 31.943  |
| Nr1i2         | 0 | 0 | 0 | 87  | 1.45     | 0.079969 | 0.345893 | Unclassified | chr16:38248434-38296910   | 46.477  |
| Olf1362       | 0 | 0 | 0 | 4   | 0.066667 | 0        | 2        | Unclassified | chr13:21702909-21705836   | 0.928   |
| Olf1507       | 0 | 0 | 0 | 1   | 0.016667 | 0.016249 | 0        | Unclassified | chr7:115763327-115766278  | 0.952   |
| Sic11a2       | 0 | 0 | 0 | 367 | 6.116667 | 3.46072  | 11.30357 | Unclassified | chr15:100218330-100255486 | 35.157  |
| Nrap          | 0 | 0 | 0 | 105 | 1.75     | 0.123874 | 0.81173  | Unclassified | chr19:56394531-56466525   | 69.995  |
| Nras          | 0 | 0 | 0 | 419 | 6.983333 | 9.19691  | 14.26974 | Unclassified | chr3:102860207-102871837  | 9.631   |
| Olf1497       | 0 | 0 | 0 | 1   | 0.016667 | 0        | 1        | Unclassified | chr7:115564086-115567031  | 0.946   |
| Olf1494       | 0 | 0 | 0 | 0   | 0        | 0        | 0        | Unclassified | chr7:115509005-115511950  | 0.946   |
| Olf1491       | 0 | 0 | 0 | 0   | 0        | 0        | 0        | Unclassified | chr7:115458409-115461342  | 0.934   |
| Olf1483       | 0 | 0 | 0 | 1   | 0.016667 | 0.0163   | 1        | Unclassified | chr7:115244824-115247772  | 0.949   |
| Lrfn5         | 0 | 0 | 0 | 91  | 1.516667 | 0.006879 | 0        | Unclassified | chr12:62623618-62946245   | 320.628 |
| Olf1497       | 0 | 0 | 0 | 3   | 0.05     | 0        | 1        | Unclassified | chr19:13869154-13872099   | 0.946   |
| Olf1502       | 0 | 0 | 0 | 0   | 0        | 0        | 0        | Unclassified | chr7:115666517-115669462  | 0.946   |
| Osta          | 0 | 0 | 0 | 48  | 0.8      | 0.041504 | 0.19725  | Unclassified | chr16:32475663-32489965   | 12.303  |
| Zic4          | 0 | 0 | 0 | 30  | 0.5      | 0.078378 | 1.253482 | Unclassified | chr9:91261809-91284186    | 20.378  |
| ApoF          | 0 | 0 | 0 | 34  | 0.566667 | 0.48886  | 0.082114 | Unclassified | chr10:127703052-127707207 | 2.156   |
| Rltpr         | 0 | 0 | 0 | 423 | 7.05     | 36.467   | 0.728724 | Unclassified | chr8:108212805-108222065  | 7.261   |
| Cyp3a13       | 0 | 0 | 0 | 21  | 0.35     | 0.017228 | 0        | Unclassified | chr5:138334160-138364847  | 28.688  |
| Olf1345       | 0 | 0 | 0 | 0   | 0        | 0.043894 | 0        | Unclassified | chr2:36493560-36496496    | 0.937   |
| Cyp3a11       | 0 | 0 | 0 | 8   | 0.133333 | 0.031568 | 0.801646 | Unclassified | chr5:146666182-146693430  | 25.249  |
| Dkk2          | 0 | 0 | 0 | 63  | 1.05     | 0.083066 | 2.473805 | Unclassified | chr3:131746255-131843266  | 95.012  |
| Arnt          | 0 | 0 | 0 | 648 | 10.8     | 9.10756  | 18.67499 | Unclassified | chr3:95236311-95301161    | 62.851  |
| Cyp2b23       | 0 | 0 | 0 | 17  | 0.283333 | 0.023495 | 1.772109 | Unclassified | chr7:27450245-27473449    | 21.205  |
| Nlrp4a        | 0 | 0 | 0 | 24  | 0.4      | 0.017925 | 0.631097 | Unclassified | chr7:27218131-27260477    | 40.347  |
| Rd19          | 0 | 0 | 0 | 5   | 0.083333 | 0.016954 | 0        | Unclassified | chr10:127284983-127298232 | 11.25   |
| BC089597      | 0 | 0 | 0 | 15  | 0.25     | 0.050657 | 0.430948 | Unclassified | chr10:127301531-127314375 | 10.845  |
| Gis2          | 0 | 0 | 0 | 161 | 2.683333 | 0.569114 | 3.849967 | Unclassified | chr10:127629690-127647059 | 15.37   |
| 5830433M19Rik | 0 | 0 | 0 | 459 | 7.65     | 4.61174  | 44.73775 | Stalled      | chr4:94166769-94225487    | 56.719  |
| Chd8          | 0 | 0 | 0 | 550 | 9.166667 | 11.1122  | 1.471279 | Elongating   | chr14:52817825-52859247   | 39.423  |
| Myst1         | 0 | 0 | 0 | 398 | 6.633333 | 9.66321  | 10.65226 | Unclassified | chr7:135054030-135069276  | 13.247  |
| Loh12cr1      | 0 | 0 | 0 | 483 | 8.05     | 5.74033  | 26.90192 | Stalled      | chr6:134588957-134661201  | 70.245  |

|               |   |   |   |      |          |          |          |              |                           |         |
|---------------|---|---|---|------|----------|----------|----------|--------------|---------------------------|---------|
| Rtp4          | 0 | 0 | 0 | 126  | 2.1      | 5.97896  | 2.222656 | Elongating   | chr16:23608004-23614306   | 4.303   |
| Vwa5a         | 0 | 0 | 0 | 69   | 1.15     | 1.90464  | 2.672213 | Unclassified | chr9:38523852-38550922    | 25.071  |
| Efcab3        | 0 | 0 | 0 | 27   | 0.45     | 0.029395 | 1.027895 | Unclassified | chr11:104951532-104978851 | 25.32   |
| Tmem8c        | 0 | 0 | 0 | 24   | 0.4      | 0.042368 | 0.624079 | Unclassified | chr2:26917157-26929681    | 10.525  |
| Wbscr22       | 0 | 0 | 0 | 466  | 7.766667 | 16.3027  | 10.88257 | Unclassified | chr5:135528826-135541980  | 11.155  |
| Fam71d        | 0 | 0 | 0 | 69   | 1.15     | 0.044118 | 1.199743 | Unclassified | chr12:79790521-79835505   | 42.985  |
| Olfr1054      | 0 | 0 | 0 | 1    | 0.016667 | 0        | 1        | Unclassified | chr2:86172572-86175511    | 0.94    |
| Olfr1107      | 0 | 0 | 0 | 0    | 0        | 0        | 0        | Unclassified | chr2:86911350-86914289    | 0.94    |
| 2410004B18Rik | 0 | 0 | 0 | 337  | 5.616667 | 18.8787  | 8.915768 | Unclassified | chr3:145598995-145607239  | 6.245   |
| Olfr1161      | 0 | 0 | 0 | 0    | 0        | 0        | 0        | Unclassified | chr2:87862880-87865846    | 0.967   |
| Fndc3a        | 0 | 0 | 0 | 2629 | 43.81667 | 7.92798  | 19.4758  | Unclassified | chr14:72937759-73111810   | 172.052 |
| Pcp411        | 0 | 0 | 0 | 55   | 0.916667 | 0.447328 | 0.929752 | Unclassified | chr1:173103394-173128399  | 23.006  |
| Olfr1055      | 0 | 0 | 0 | 0    | 0        | 0.027298 | 0        | Unclassified | chr2:86186982-86189921    | 0.94    |
| Cyp4a14       | 0 | 0 | 0 | 11   | 0.183333 | 0.030821 | 0.472101 | Unclassified | chr4:115158804-115170746  | 9.943   |
| Olfr1196      | 0 | 0 | 0 | 1    | 0.016667 | 0.016319 | 1        | Unclassified | chr2:88540539-88543484    | 0.946   |
| Cyp4a12b      | 0 | 0 | 0 | 8    | 0.133333 | 0.013346 | 0        | Unclassified | chr4:115082228-115111639  | 27.412  |
| Olfr1162      | 0 | 0 | 0 | 1    | 0.016667 | 0        | 0        | Unclassified | chr2:87889834-87892779    | 0.946   |
| Slc26a1       | 0 | 0 | 0 | 110  | 1.833333 | 0        | 0.667286 | Unclassified | chr5:109099565-109106668  | 5.104   |
| Enkur         | 0 | 0 | 0 | 145  | 2.416667 | 2.07281  | 51.27452 | Stalled      | chr2:21102357-21128992    | 24.636  |
| Dppa3         | 0 | 0 | 0 | 4    | 0.066667 | 0.038188 | 0.487092 | Unclassified | chr6:122574441-122580289  | 3.849   |
| Sohlh2        | 0 | 0 | 0 | 10   | 0.166667 | 0.016375 | 1.541744 | Unclassified | chr3:54983965-55013879    | 27.915  |
| Lypd6         | 0 | 0 | 0 | 49   | 0.816667 | 0.040291 | 0        | Unclassified | chr2:49981889-50049084    | 65.196  |
| Abca16        | 0 | 0 | 0 | 37   | 0.616667 | 0.035293 | 0        | Unclassified | chr7:127563214-127688325  | 123.112 |
| Mlana         | 0 | 0 | 0 | 24   | 0.4      | 1.00084  | 0.95689  | Unclassified | chr19:29770430-29782796   | 10.367  |
| Man1c1        | 0 | 0 | 0 | 397  | 6.616667 | 0.640069 | 5.218052 | Unclassified | chr4:134117604-134262205  | 142.602 |
| Ankrd42       | 0 | 0 | 0 | 119  | 1.983333 | 2.52866  | 55.31949 | Stalled      | chr7:99732692-99787652    | 52.961  |
| Olfr1209      | 0 | 0 | 0 | 0    | 0        | 0.030299 | 0        | Unclassified | chr2:88749617-88752548    | 0.932   |
| C1m3          | 0 | 0 | 0 | 0    | 0        | 0.014287 | 0        | Unclassified | chr11:114903444-114911609 | 6.166   |
| Smcr71        | 0 | 0 | 0 | 700  | 11.66667 | 5.74096  | 10.68682 | Unclassified | chr15:80062509-80083799   | 19.291  |
| Olfr1199      | 0 | 0 | 0 | 0    | 0        | 0        | 0        | Unclassified | chr2:88595897-88598830    | 0.934   |
| Gmip          | 0 | 0 | 0 | 959  | 15.98333 | 23.9979  | 5.497424 | Unclassified | chr8:72330585-72345769    | 13.185  |
| Olfr138       | 0 | 0 | 0 | 0    | 0        | 0        | 0        | Unclassified | chr17:38409717-38412656   | 0.94    |
| Olfr1215      | 0 | 0 | 0 | 0    | 0        | 0        | 0        | Unclassified | chr2:88841506-88844447    | 0.942   |
| Tmem119       | 0 | 0 | 0 | 19   | 0.316667 | 0.172694 | 0.859873 | Unclassified | chr5:114243737-114252361  | 6.625   |
| Krtap4-16     | 0 | 0 | 0 | 1    | 0.016667 | 0.04043  | 0        | Unclassified | chr11:99711968-99714919   | 0.952   |
| Krtap9-5      | 0 | 0 | 0 | 2    | 0.033333 | 0        | 1        | Unclassified | chr11:99807788-99810865   | 1.078   |
| Ssh1          | 0 | 0 | 0 | 460  | 7.666667 | 3.5288   | 6.453778 | Unclassified | chr5:114392227-114445766  | 51.54   |
| Rap1gds1      | 0 | 0 | 0 | 1785 | 29.75    | 11.7392  | 31.11995 | Unclassified | chr3:138588669-138740163  | 149.295 |
| Pla2g4f       | 0 | 0 | 0 | 51   | 0.85     | 0.028792 | 1.641875 | Unclassified | chr2:120125701-120141901  | 14.201  |
| Miox          | 0 | 0 | 0 | 10   | 0.166667 | 0        | 0.407643 | Unclassified | chr15:89162903-89167438   | 2.536   |
| Tdrd7         | 0 | 0 | 0 | 141  | 2.35     | 1.51116  | 0        | Unclassified | chr4:45998333-46047631    | 47.299  |
| Rhox4e        | 0 | 0 | 0 | 0    | 0        | 0        | 0        | Unclassified | chrX:34969918-34976789    | 4.872   |
| Gm9           | 0 | 0 | 0 | 3    | 0.05     | 0        | 2        | Unclassified | chrX:34748496-34753036    | 2.541   |
| Gpr153        | 0 | 0 | 0 | 70   | 1.166667 | 0.362984 | 2.101269 | Unclassified | chr4:151646470-151659446  | 10.977  |
| 1700021K19Rik | 0 | 0 | 0 | 587  | 9.783333 | 19.6248  | 15.11532 | Unclassified | chr16:32821821-32870425   | 46.605  |
| Olfr698       | 0 | 0 | 0 | 3    | 0.05     | 0.041078 | 3        | Unclassified | chr7:113895964-113898900  | 0.937   |
| Olfr710       | 0 | 0 | 0 | 4    | 0.066667 | 0        | 0        | Unclassified | chr7:114087580-114093826  | 4.247   |
| Olfr700       | 0 | 0 | 0 | 2    | 0.033333 | 0        | 2        | Unclassified | chr7:113949023-113951974  | 0.952   |
| Ccdc61        | 0 | 0 | 0 | 226  | 3.766667 | 7.47105  | 15.99681 | Stalled      | chr7:19476232-19497753    | 19.522  |
| Olfr695       | 0 | 0 | 0 | 2    | 0.033333 | 0        | 2        | Unclassified | chr7:113857245-113860193  | 0.949   |
| Olfr702       | 0 | 0 | 0 | 4    | 0.066667 | 0        | 3        | Unclassified | chr7:113967081-113970038  | 0.958   |
| Gm1322        | 0 | 0 | 0 | 4    | 0.066667 | 0        | 0        | Unclassified | chr2:67009890-67024269    | 12.38   |
| Ubxn7         | 0 | 0 | 0 | 637  | 10.61667 | 2.23607  | 26.33146 | Unclassified | chr16:32303337-32393832   | 61.496  |
| AY761184      | 0 | 0 | 0 | 1    | 0.016667 | 0.018058 | 1        | Unclassified | chr8:22812995-22816119    | 1.125   |
| Slc35b1       | 0 | 0 | 0 | 448  | 7.466667 | 39.6927  | 3.725248 | Unclassified | chr11:95244235-95252966   | 6.732   |
| Ntf3          | 0 | 0 | 0 | 56   | 0.933333 | 0.028385 | 0.543661 | Unclassified | chr6:126051430-126118762  | 65.333  |
| Zfp692        | 0 | 0 | 0 | 144  | 2.4      | 9.12508  | 6.16262  | Unclassified | chr11:58118570-58128115   | 7.546   |
| Rab19         | 0 | 0 | 0 | 153  | 2.55     | 4.48178  | 6.863495 | Unclassified | chr6:39329426-39340378    | 8.953   |
| Rab33a        | 0 | 0 | 0 | 29   | 0.483333 | 1.14596  | 9.901455 | Unclassified | chrX:45870646-45883409    | 10.764  |
| Ush2a         | 0 | 0 | 0 | 484  | 8.066667 | 0.027425 | 2.975731 | Unclassified | chr1:190084716-190788918  | 702.203 |
| Kcnt2         | 0 | 0 | 0 | 134  | 2.233333 | 0.02915  | 2.204463 | Unclassified | chr1:142140833-142506838  | 364.006 |
| Fip111        | 0 | 0 | 0 | 808  | 13.46667 | 25.1494  | 26.2236  | Unclassified | chr5:74929506-74993149    | 61.644  |
| Scgb1a1       | 0 | 0 | 0 | 3    | 0.05     | 0.054771 | 0.768304 | Unclassified | chr19:9158131-9164446     | 4.316   |
| Utf1          | 0 | 0 | 0 | 12   | 0.2      | 0.905982 | 1.845787 | Unclassified | chr7:147127754-147131011  | 1.258   |
| Usp9x         | 0 | 0 | 0 | 888  | 14.8     | 4.45927  | 29.03454 | Unclassified | chrX:12646623-12750453    | 101.831 |
| Kdm6a         | 0 | 0 | 0 | 747  | 12.45    | 4.56836  | 57.00318 | Stalled      | chrX:17737792-17856484    | 116.693 |
| Utrn          | 0 | 0 | 0 | 1119 | 18.65    | 1.32674  | 2.110072 | Unclassified | chr10:12101985-12583533   | 479.549 |
| Esd           | 0 | 0 | 0 | 285  | 4.75     | 9.96209  | 13.06878 | Unclassified | chr14:75130151-75150250   | 18.1    |
| Acot10        | 0 | 0 | 0 | 2    | 0.033333 | 2.96997  | 0        | Unclassified | chr15:20594968-20598505   | 1.538   |
| Klk12         | 0 | 0 | 0 | 7    | 0.116667 | 0        | 1.374644 | Unclassified | chr7:51022469-51028851    | 4.383   |
| Fam26f        | 0 | 0 | 0 | 66   | 1.1      | 10.3819  | 28.02887 | Unclassified | chr10:33845874-33849778   | 1.905   |
| Psma7         | 0 | 0 | 0 | 647  | 10.78333 | 126.521  | 6.155652 | Unclassified | chr2:179771080-179779107  | 6.028   |
| Poli          | 0 | 0 | 0 | 469  | 7.816667 | 5.11356  | 54.2308  | Stalled      | chr18:70668334-70691792   | 21.459  |
| Psma4         | 0 | 0 | 0 | 428  | 7.133333 | 51.5565  | 9.769933 | Unclassified | chr9:54796665-54805837    | 7.173   |
| Batf3         | 0 | 0 | 0 | 412  | 6.866667 | 8.17171  | 3.350772 | Unclassified | chr1:192920292-192932822  | 10.531  |
| Ab12          | 0 | 0 | 0 | 1151 | 19.18333 | 3.06101  | 15.45219 | Unclassified | chr1:158486917-158579750  | 90.834  |
| Creb3l2       | 0 | 0 | 0 | 557  | 9.283333 | 8.24824  | 20.91333 | Stalled      | chr6:37281020-37394148    | 111.129 |
| Oplah         | 0 | 0 | 0 | 41   | 0.683333 | 0.177466 | 0.211287 | Unclassified | chr15:76127032-76139675   | 10.644  |
| Pfn3          | 0 | 0 | 0 | 2    | 0.033333 | 0.293288 | 2        | Unclassified | chr13:55516048-55518593   | 0.546   |
| Iqcf5         | 0 | 0 | 0 | 2    | 0.033333 | 0        | 0        | Unclassified | chr9:106414903-106418334  | 1.432   |
| 1700009N14Rik | 0 | 0 | 0 | 1    | 0.016667 | 0.049841 | 0        | Unclassified | chr4:39395325-39398811    | 1.487   |
| Olfr734       | 0 | 0 | 0 | 3    | 0.05     | 0.040816 | 2        | Unclassified | chr14:50939566-50942508   | 0.943   |
| Lrrc4c        | 0 | 0 | 0 | 66   | 1.1      | 0.044258 | 0        | Unclassified | chr2:97305830-97471821    | 163.992 |
| Zscan12       | 0 | 0 | 0 | 165  | 2.75     | 0.851642 | 23.31589 | Stalled      | chr13:21452688-21464171   | 9.484   |
| Prss44        | 0 | 0 | 0 | 6    | 0.1      | 0.027922 | 2.401598 | Unclassified | chr9:110714497-110720501  | 4.005   |
| Slc25a31      | 0 | 0 | 0 | 7    | 0.116667 | 0.024296 | 0.730034 | Unclassified | chr3:40510792-40530016    | 17.225  |

|               |   |   |   |      |          |          |          |              |                          |         |
|---------------|---|---|---|------|----------|----------|----------|--------------|--------------------------|---------|
| Ccdc30        | 0 | 0 | 0 | 143  | 2.383333 | 1.6019   | 3.698302 | Unclassified | chr4:118996443-119090126 | 91.684  |
| Cyb5r4        | 0 | 0 | 0 | 351  | 5.85     | 6.68134  | 27.29684 | Stalled      | chr9:86914863-86972609   | 55.747  |
| Trmprs7       | 0 | 0 | 0 | 22   | 0.366667 | 0.044622 | 0        | Unclassified | chr16:45656429-45687489  | 29.061  |
| Abpa          | 0 | 0 | 0 | 0    | 0        | 0        | 0        | Unclassified | chr7:34804585-34807900   | 1.316   |
| Zfp93         | 0 | 0 | 0 | 21   | 0.35     | 0.347554 | 7.213766 | Unclassified | chr7:25053436-25062813   | 7.378   |
| Zfp92         | 0 | 0 | 0 | 11   | 0.183333 | 0.044586 | 0.598168 | Unclassified | chrX:70654441-70672326   | 15.886  |
| Zkscan5       | 0 | 0 | 0 | 274  | 4.566667 | 4.20215  | 16.1627  | Unclassified | chr5:145963427-145982612 | 17.186  |
| Phldb2        | 0 | 0 | 0 | 82   | 1.366667 | 0.060664 | 1.673534 | Unclassified | chr16:45746345-45846491  | 98.147  |
| 2310038E17Rik | 0 | 0 | 0 | 9    | 0.15     | 0.014875 | 1.677249 | Unclassified | chr8:107469255-107479862 | 8.608   |
| Olfir32       | 0 | 0 | 0 | 1    | 0.016667 | 0.00974  | 0        | Unclassified | chr2:89978367-89981294   | 0.928   |
| Fzd3          | 0 | 0 | 0 | 65   | 1.083333 | 0.068397 | 3.895762 | Unclassified | chr14:65811277-65883300  | 70.024  |
| Taf1          | 0 | 0 | 0 | 422  | 7.033333 | 7.56144  | 19.72606 | Stalled      | chrX:98726073-98797128   | 69.056  |
| Sval3         | 0 | 0 | 0 | 6    | 0.1      | 0        | 0        | Unclassified | chr6:41916138-41923089   | 4.952   |
| Spin4         | 0 | 0 | 0 | 4    | 0.066667 | 1.28584  | 1.227352 | Unclassified | chrX:92217845-92224021   | 4.177   |
| Igsf21        | 0 | 0 | 0 | 277  | 4.616667 | 0.038975 | 0.443245 | Unclassified | chr4:139582766-139804699 | 219.934 |
| AI464131      | 0 | 0 | 0 | 28   | 0.466667 | 0.359336 | 1.467251 | Unclassified | chr4:41442636-41452109   | 7.474   |
| Eif3j         | 0 | 0 | 0 | 795  | 13.25    | 12.3439  | 23.51756 | Unclassified | chr2:121852358-121879365 | 25.008  |
| Eif4g3        | 0 | 0 | 0 | 4350 | 72.5     | 23.2032  | 11.44894 | Unclassified | chr4:137547384-137762386 | 213.003 |
| Kcnrg         | 0 | 0 | 0 | 16   | 0.266667 | 0        | 2.612795 | Unclassified | chr14:62224293-62231670  | 5.378   |
| Pkhd1         | 0 | 0 | 0 | 231  | 3.85     | 0.033706 | 0.709494 | Unclassified | chr1:20047859-20610138   | 560.28  |
| Tmem90a       | 0 | 0 | 0 | 38   | 0.633333 | 0.156416 | 0.753003 | Unclassified | chr12:86018227-86041757  | 21.531  |
| Wdr54         | 0 | 0 | 0 | 27   | 0.45     | 5.33339  | 4.003749 | Unclassified | chr6:83102704-83108373   | 3.67    |
| Pigk          | 0 | 0 | 0 | 629  | 10.48333 | 4.38802  | 17.82574 | Unclassified | chr3:152375063-152451975 | 74.913  |
| Adamts10      | 0 | 0 | 0 | 367  | 6.116667 | 7.63144  | 9.376305 | Unclassified | chr17:33659168-33690421  | 29.254  |
| Reep5         | 0 | 0 | 0 | 674  | 11.23333 | 18.3302  | 7.176543 | Unclassified | chr18:34504539-34535069  | 28.531  |
| Aars2         | 0 | 0 | 0 | 286  | 4.766667 | 10.0331  | 10.22851 | Unclassified | chr17:45641789-45657792  | 14.004  |
| Hmox1         | 0 | 0 | 0 | 226  | 3.766667 | 10.6337  | 7.788797 | Unclassified | chr8:77615516-77624491   | 6.976   |
| Lrrc2         | 0 | 0 | 0 | 41   | 0.683333 | 0.08065  | 0.440724 | Unclassified | chr9:110852048-110886568 | 32.521  |
| Dpep1         | 0 | 0 | 0 | 28   | 0.466667 | 0.068537 | 0        | Unclassified | chr8:125708134-125725713 | 15.58   |
| Rtp3          | 0 | 0 | 0 | 4    | 0.066667 | 0.01828  | 0        | Unclassified | chr9:110887448-110894217 | 4.77    |
| Als2cl        | 0 | 0 | 0 | 64   | 1.066667 | 0.183551 | 3.02638  | Unclassified | chr9:110780677-110803033 | 20.357  |
| Clasp2        | 0 | 0 | 0 | 1190 | 19.83333 | 4.32224  | 40.85189 | Unclassified | chr9:113648590-113828815 | 178.226 |
| Prss50        | 0 | 0 | 0 | 9    | 0.15     | 0.140936 | 0        | Unclassified | chr9:110758470-110767132 | 6.663   |
| Nt5dc2        | 0 | 0 | 0 | 44   | 0.733333 | 9.21213  | 1.080079 | Unclassified | chr14:31946038-31952310  | 4.273   |
| Lonrf1        | 0 | 0 | 0 | 582  | 9.7      | 2.7527   | 6.754525 | Unclassified | chr8:37279117-37314570   | 33.454  |
| Mcm10         | 0 | 0 | 0 | 863  | 14.38333 | 10.0965  | 4.490927 | Unclassified | chr2:4911770-4935837     | 22.068  |
| Tspo2         | 0 | 0 | 0 | 8    | 0.133333 | 0.287853 | 0.340804 | Unclassified | chr17:48587759-48592826  | 3.068   |
| A730069N07Rik | 0 | 0 | 0 | 14   | 0.233333 | 0.051398 | 1.913656 | Unclassified | chr8:37998637-38017490   | 16.854  |
| Cyp2c50       | 0 | 0 | 0 | 8    | 0.133333 | 0.025329 | 0        | Unclassified | chr19:40162168-40188445  | 24.278  |
| Plekha1       | 0 | 0 | 0 | 163  | 2.716667 | 1.8672   | 16.43947 | Stalled      | chr7:138007423-138056816 | 47.394  |
| Alpp12        | 0 | 0 | 0 | 4    | 0.066667 | 0.018205 | 0.528191 | Unclassified | chr1:88983265-88988503   | 3.239   |
| Alas2         | 0 | 0 | 0 | 117  | 1.95     | 0.161904 | 0.661873 | Unclassified | chrX:146979959-147005165 | 23.207  |
| Mtap6         | 0 | 0 | 0 | 153  | 2.55     | 0.691899 | 0.959868 | Unclassified | chr7:106413956-106485647 | 69.692  |
| Sox3          | 0 | 0 | 0 | 5    | 0.083333 | 0.124129 | 0.347684 | Unclassified | chrX:58144540-58148605   | 2.066   |
| Mtcp1         | 0 | 0 | 0 | 326  | 5.433333 | 10.2281  | 63.69726 | Stalled      | chrX:72650185-72663882   | 11.698  |
| Kpna4         | 0 | 0 | 0 | 1085 | 18.08333 | 14.2487  | 33.14656 | Unclassified | chr3:68876142-68933014   | 54.873  |
| Mthfd2        | 0 | 0 | 0 | 661  | 11.01667 | 34.358   | 11.28991 | Unclassified | chr6:83255697-83269598   | 11.902  |
| Sox5          | 0 | 0 | 0 | 377  | 6.283333 | 0.405061 | 0        | Unclassified | chr6:143781348-144160078 | 376.731 |
| Sox6          | 0 | 0 | 0 | 417  | 6.95     | 0.048493 | 0.577724 | Unclassified | chr7:122614857-123184258 | 567.402 |
| Spr3          | 0 | 0 | 0 | 1    | 0.016667 | 0        | 1        | Unclassified | chr3:92260740-92263457   | 0.718   |
| E230025N22Rik | 0 | 0 | 0 | 85   | 1.416667 | 0.038144 | 0.439717 | Unclassified | chr18:36844576-36857579  | 11.004  |
| Ogfod1        | 0 | 0 | 0 | 287  | 4.783333 | 4.12584  | 42.20821 | Stalled      | chr8:96559097-96591822   | 30.726  |
| Folr2         | 0 | 0 | 0 | 40   | 0.666667 | 0.170034 | 0.949539 | Unclassified | chr7:108988501-109007708 | 17.208  |
| Glyat         | 0 | 0 | 0 | 17   | 0.283333 | 0.02935  | 0.53748  | Unclassified | chr19:12705797-12726227  | 18.431  |
| Mmp1b         | 0 | 0 | 0 | 10   | 0.166667 | 0        | 0        | Unclassified | chr9:7367669-7390026     | 20.358  |
| Prss46        | 0 | 0 | 0 | 18   | 0.3      | 0.040784 | 0.440403 | Unclassified | chr9:110745009-110759026 | 12.018  |
| CN716893      | 0 | 0 | 0 | 1    | 0.016667 | 0.007988 | 0        | Unclassified | chrX:83495594-83503558   | 5.965   |
| Spr2h         | 0 | 0 | 0 | 0    | 0        | 0        | 0        | Unclassified | chr3:92187606-92191241   | 1.636   |
| Mmp1a         | 0 | 0 | 0 | 6    | 0.1      | 0.018997 | 1.491418 | Unclassified | chr9:7462140-7476869     | 12.73   |
| Gm2382        | 0 | 0 | 0 | 93   | 1.55     | 8.4151   | 5.479208 | Unclassified | chr9:88583442-88616636   | 31.195  |
| Gprc6a        | 0 | 0 | 0 | 13   | 0.216667 | 0.044875 | 0        | Unclassified | chr10:51334628-51353264  | 16.637  |
| Arsj          | 0 | 0 | 0 | 53   | 0.883333 | 0.055572 | 1.193829 | Unclassified | chr3:126064769-126143292 | 76.524  |
| D8Erd738e     | 0 | 0 | 0 | 268  | 4.466667 | 118.881  | 9.123125 | Unclassified | chr8:86770133-86775660   | 3.528   |
| Klrc2         | 0 | 0 | 0 | 0    | 0        | 0.056483 | 0        | Unclassified | chr6:129606363-129612614 | 4.252   |
| Pramel7       | 0 | 0 | 0 | 2    | 0.033333 | 0.048234 | 1        | Unclassified | chr2:87329244-87334575   | 3.332   |
| St8sia2       | 0 | 0 | 0 | 81   | 1.35     | 0.088224 | 1.465769 | Unclassified | chr7:81084005-81160568   | 74.564  |
| St8sia3       | 0 | 0 | 0 | 18   | 0.3      | 0.020408 | 0        | Unclassified | chr18:64412012-64435798  | 21.787  |
| Kird1         | 0 | 0 | 0 | 5    | 0.083333 | 0        | 0.510164 | Unclassified | chr6:129541505-129548670 | 5.166   |
| St3gal5       | 0 | 0 | 0 | 308  | 5.133333 | 4.00138  | 10.39923 | Stalled      | chr6:72045606-72104564   | 56.959  |
| Ttll4         | 0 | 0 | 0 | 345  | 5.75     | 3.83273  | 10.75372 | Unclassified | chr1:74706327-74744547   | 36.221  |
| Rnf24         | 0 | 0 | 0 | 545  | 9.083333 | 2.03986  | 17.55167 | Unclassified | chr2:131124223-131180561 | 54.339  |
| Stx3          | 0 | 0 | 0 | 127  | 2.116667 | 1.55302  | 1.333656 | Unclassified | chr19:11849607-11895893  | 44.287  |
| Dusp16        | 0 | 0 | 0 | 600  | 10       | 2.32838  | 10.8766  | Unclassified | chr6:134665490-134744646 | 77.157  |
| Fam175a       | 0 | 0 | 0 | 633  | 10.55    | 4.50865  | 14.56308 | Unclassified | chr5:101233820-101251954 | 16.135  |
| Utp20         | 0 | 0 | 0 | 1250 | 20.83333 | 5.88334  | 9.662742 | Unclassified | chr10:88209352-88291559  | 80.208  |
| Dnajc21       | 0 | 0 | 0 | 285  | 4.75     | 12.452   | 13.99317 | Unclassified | chr15:10376517-10402271  | 23.755  |
| Acbd7         | 0 | 0 | 0 | 23   | 0.383333 | 0.119779 | 7.827353 | Unclassified | chr2:3251439-3258269     | 4.831   |
| Phf23         | 0 | 0 | 0 | 494  | 8.233333 | 27.4627  | 1.814882 | Elongating   | chr11:69807272-69813513  | 4.242   |
| Cst11         | 0 | 0 | 0 | 3    | 0.05     | 0.190341 | 0.484669 | Unclassified | chr2:148594353-148599233 | 2.881   |
| Spink12       | 0 | 0 | 0 | 1    | 0.016667 | 0.129458 | 0        | Unclassified | chr18:44262176-44268197  | 4.022   |
| Armcx1        | 0 | 0 | 0 | 8    | 0.133333 | 0.518693 | 2.48912  | Unclassified | chrX:131250476-131256449 | 3.974   |
| Gm14725       | 0 | 0 | 0 | 1    | 0.016667 | 0.007721 | 1        | Unclassified | chrX:67796732-67799560   | 0.829   |
| D15Erd621e    | 0 | 0 | 0 | 770  | 12.83333 | 6.82878  | 14.05013 | Unclassified | chr15:58245022-58289356  | 42.335  |
| Magea10       | 0 | 0 | 0 | 0    | 0        | 0        | 0        | Unclassified | chrX:69627208-69634197   | 4.99    |
| Calb1         | 0 | 0 | 0 | 19   | 0.316667 | 0.008941 | 0.589838 | Unclassified | chr4:15806410-15833856   | 25.447  |
| BC037034      | 0 | 0 | 0 | 489  | 8.15     | 15.3805  | 6.098164 | Unclassified | chr5:138700885-138707280 | 4.396   |

|               |   |   |   |      |           |          |          |              |                           |         |
|---------------|---|---|---|------|-----------|----------|----------|--------------|---------------------------|---------|
| Cyp3a57       | 0 | 0 | 0 | 30   | 0.5       | 0        | 0        | Unclassified | chr5:146104138-146151381  | 45.244  |
| Otog          | 0 | 0 | 0 | 136  | 2.266667  | 0.035732 | 0        | Unclassified | chr7:53494356-53566804    | 70.449  |
| Prr16         | 0 | 0 | 0 | 72   | 1.2       | 0.011526 | 3.68915  | Unclassified | chr18:51275551-51464295   | 186.745 |
| Otc           | 0 | 0 | 0 | 13   | 0.216667  | 0.011317 | 0        | Unclassified | chrX:9827484-9898150      | 68.667  |
| Arid5b        | 0 | 0 | 0 | 3916 | 65.266667 | 4.26065  | 3.246585 | Unclassified | chr10:67558340-67743474   | 183.135 |
| Osmr          | 0 | 0 | 0 | 53   | 0.883333  | 0.045063 | 1.648127 | Unclassified | chr15:6763576-6826313     | 60.738  |
| S100g         | 0 | 0 | 0 | 8    | 0.133333  | 0        | 0.21146  | Unclassified | chrX:159399923-159404531  | 2.609   |
| Sqstm1        | 0 | 0 | 0 | 825  | 13.75     | 75.9774  | 6.034587 | Unclassified | chr11:50013653-50026292   | 10.64   |
| Arhgef4       | 0 | 0 | 0 | 473  | 7.883333  | 1.98324  | 1.578818 | Elongating   | chr1:34856566-34869599    | 11.034  |
| Lhfp1         | 0 | 0 | 0 | 13   | 0.216667  | 0.061366 | 1.679006 | Unclassified | chrX:141724901-141785437  | 58.537  |
| Crcp          | 0 | 0 | 0 | 763  | 12.71667  | 16.8496  | 16.06433 | Unclassified | chr5:130503175-130536653  | 31.479  |
| Lrrc8b        | 0 | 0 | 0 | 345  | 5.75      | 1.10512  | 28.44369 | Stalled      | chr5:105842793-105915208  | 70.416  |
| Trim12        | 0 | 0 | 0 | 200  | 3.333333  | 12.2907  | 4.467448 | Unclassified | chr7:111448410-111466009  | 15.6    |
| Clip3         | 0 | 0 | 0 | 48   | 0.8       | 0.434978 | 1.654939 | Unclassified | chr7:31074771-31093386    | 16.616  |
| Ttc26         | 0 | 0 | 0 | 102  | 1.7       | 0.322593 | 22.30116 | Stalled      | chr6:38329523-38377647    | 46.125  |
| V1ra3         | 0 | 0 | 0 | 0    | 0         | 0.016966 | 0        | Unclassified | chr6:89985926-89988835    | 0.91    |
| Ybx2          | 0 | 0 | 0 | 20   | 0.333333  | 0.581432 | 4.071957 | Unclassified | chr11:69747400-69755101   | 5.702   |
| Syt5          | 0 | 0 | 0 | 12   | 0.2       | 0.095207 | 0.367249 | Unclassified | chr7:4491366-4500169      | 6.804   |
| Tmem150c      | 0 | 0 | 0 | 114  | 1.9       | 1.11779  | 0.428381 | Unclassified | chr5:100506891-100590827  | 81.937  |
| V1ra7         | 0 | 0 | 0 | 1    | 0.016667  | 0.034403 | 0        | Unclassified | chr6:90126709-90129639    | 0.931   |
| V1ra6         | 0 | 0 | 0 | 1    | 0.016667  | 0.030009 | 1        | Unclassified | chr6:89794589-89797531    | 0.943   |
| Pgm21l        | 0 | 0 | 0 | 309  | 5.15      | 2.06044  | 77.04881 | Stalled      | chr7:107374116-107427382  | 51.267  |
| Arhgap19      | 0 | 0 | 0 | 354  | 5.9       | 10.2443  | 14.84897 | Unclassified | chr19:41841077-41878574   | 35.498  |
| 38971         | 0 | 0 | 0 | 17   | 0.283333  | 0.070309 | 1.680711 | Unclassified | chr16:4988177-4999872     | 9.696   |
| 4933412E24Rik | 0 | 0 | 0 | 1    | 0.016667  | 0.029244 | 0        | Unclassified | chr15:59846420-59850173   | 1.754   |
| 5730528L13Rik | 0 | 0 | 0 | 28   | 0.466667  | 0.291156 | 1.399111 | Unclassified | chr4:48550817-48574791    | 21.975  |
| Dmx12         | 0 | 0 | 0 | 79   | 1.316667  | 0.161804 | 3.233637 | Unclassified | chr9:54212964-54351433    | 136.47  |
| Krtap16-8     | 0 | 0 | 0 | 1    | 0.016667  | 0        | 1        | Unclassified | chr16:89047533-89050144   | 0.612   |
| Mpz1l         | 0 | 0 | 0 | 251  | 4.183333  | 2.57043  | 26.6529  | Stalled      | chr1:167522311-167566672  | 42.362  |
| Ina           | 0 | 0 | 0 | 22   | 0.366667  | 0.288184 | 1.754564 | Unclassified | chr19:47087187-47098836   | 9.65    |
| Taf5          | 0 | 0 | 0 | 581  | 9.683333  | 3.71229  | 23.76387 | Unclassified | chr19:47140237-47157969   | 15.733  |
| Col12a1       | 0 | 0 | 0 | 71   | 1.183333  | 0.027482 | 0.629019 | Unclassified | chr9:79446797-79568485    | 119.689 |
| 5330417C22Rik | 0 | 0 | 0 | 157  | 2.616667  | 0.215789 | 2.79804  | Unclassified | chr3:108260986-108341440  | 78.455  |
| E230019M04Rik | 0 | 0 | 0 | 19   | 0.316667  | 0.05096  | 0.704531 | Unclassified | chrX:136595417-136641336  | 43.92   |
| Ifit2         | 0 | 0 | 0 | 229  | 3.816667  | 3.3292   | 14.14285 | Stalled      | chr19:34623183-34651024   | 25.842  |
| Serpina7      | 0 | 0 | 0 | 2    | 0.033333  | 0        | 0        | Unclassified | chrX:135613795-135621775  | 5.981   |
| Hsd17b4       | 0 | 0 | 0 | 231  | 3.85      | 8.49634  | 16.66664 | Stalled      | chr18:50285992-50355920   | 67.929  |
| Tceal5        | 0 | 0 | 0 | 0    | 0         | 0.033012 | 0        | Unclassified | chrX:132735489-132740390  | 2.902   |
| Ifi204        | 0 | 0 | 0 | 10   | 0.166667  | 2.74492  | 1.453701 | Unclassified | chr1:175677424-175699050  | 19.627  |
| Hspa1l        | 0 | 0 | 0 | 91   | 1.516667  | 0.762    | 0.742789 | Unclassified | chr17:35107647-35116173   | 6.527   |
| Ifi47         | 0 | 0 | 0 | 440  | 7.333333  | 0        | 2.642008 | Elongating   | chr11:48898556-48910473   | 9.918   |
| Gas2l2        | 0 | 0 | 0 | 34   | 0.566667  | 0.137493 | 0.537957 | Unclassified | chr11:83235403-83244957   | 7.555   |
| Hsd17b2       | 0 | 0 | 0 | 58   | 0.966667  | 0.320408 | 2.094971 | Unclassified | chr8:120223845-120282929  | 57.085  |
| Hsd17b1       | 0 | 0 | 0 | 13   | 0.216667  | 0.184898 | 1.070313 | Unclassified | chr11:100937724-100941819 | 2.096   |
| Hs3st2        | 0 | 0 | 0 | 141  | 2.35      | 0.050814 | 2.752286 | Unclassified | chr7:128533809-128645282  | 109.474 |
| Olfr312       | 0 | 0 | 0 | 1    | 0.016667  | 0.022323 | 1        | Unclassified | chr11:58642657-58645584   | 0.928   |
| Olfr316       | 0 | 0 | 0 | 0    | 0         | 0.146887 | 0        | Unclassified | chr11:58569168-58572089   | 0.922   |
| Epn3          | 0 | 0 | 0 | 39   | 0.65      | 0.640408 | 1.254916 | Unclassified | chr11:94352304-94363237   | 8.934   |
| Krt33a        | 0 | 0 | 0 | 3    | 0.05      | 0.02447  | 0.667498 | Unclassified | chr11:99872512-99879526   | 5.015   |
| Isoc1         | 0 | 0 | 0 | 295  | 4.916667  | 9.59416  | 17.27928 | Unclassified | chr18:58817135-58839224   | 20.09   |
| Gnao1         | 0 | 0 | 0 | 274  | 4.566667  | 0.135074 | 0.368498 | Unclassified | chr8:96332737-96493288    | 158.552 |
| Dnajc10       | 0 | 0 | 0 | 513  | 8.55      | 9.20758  | 42.34055 | Unclassified | chr2:80153622-80194212    | 38.591  |
| 2810021B07Rik | 0 | 0 | 0 | 361  | 0.616667  | 4.63736  | 21.83612 | Stalled      | chr13:17785246-17790939   | 3.694   |
| Tmem128       | 0 | 0 | 0 | 395  | 6.583333  | 15.3409  | 8.026861 | Unclassified | chr5:38649613-38660857    | 9.245   |
| Chit1         | 0 | 0 | 0 | 40   | 0.666667  | 0.044943 | 1.015493 | Unclassified | chr1:136005818-136048013  | 40.196  |
| Gnb1          | 0 | 0 | 0 | 1400 | 23.33333  | 39.6224  | 10.2044  | Unclassified | chr4:154863469-154933377  | 67.909  |
| 2310002L09Rik | 0 | 0 | 0 | 8    | 0.133333  | 0        | 0        | Unclassified | chr4:73585274-73598750    | 11.477  |
| Snrnp40       | 0 | 0 | 0 | 910  | 15.16667  | 46.4872  | 16.80001 | Unclassified | chr4:130035378-130067278  | 29.901  |
| Pcdh9         | 0 | 0 | 0 | 321  | 5.35      | 0.030156 | 0        | Unclassified | chr14:93412919-94289951   | 875.033 |
| Iqcf3         | 0 | 0 | 0 | 13   | 0.216667  | 0.045691 | 0.632866 | Unclassified | chr9:106445719-106465956  | 18.238  |
| Zdhhc21       | 0 | 0 | 0 | 582  | 9.7       | 2.08841  | 29.26389 | Unclassified | chr4:82444642-82507565    | 60.924  |
| Pex19         | 0 | 0 | 0 | 214  | 3.566667  | 9.3887   | 7.327965 | Unclassified | chr1:174054885-174066628  | 9.744   |
| Nav1          | 0 | 0 | 0 | 239  | 3.983333  | 0.10718  | 1.569262 | Unclassified | chr1:137331156-137483932  | 150.777 |
| Ccdc127       | 0 | 0 | 0 | 421  | 7.016667  | 4.8596   | 42.76685 | Stalled      | chr13:74485764-74497115   | 9.352   |
| Dhdpsi        | 0 | 0 | 0 | 45   | 0.75      | 0.12542  | 1.909177 | Unclassified | chr19:42118340-42145429   | 25.09   |
| 4921536K21Rik | 0 | 0 | 0 | 29   | 0.483333  | 0.544185 | 9.523691 | Unclassified | chr11:3786090-3797129     | 9.04    |
| Ssr3          | 0 | 0 | 0 | 626  | 10.43333  | 44.793   | 6.738835 | Unclassified | chr3:65183578-65198475    | 12.898  |
| Akr1c21       | 0 | 0 | 0 | 5    | 0.083333  | 0        | 0        | Unclassified | chr13:4571320-4585789     | 12.47   |
| Ankrd33b      | 0 | 0 | 0 | 2933 | 48.88333  | 8.894    | 4.53475  | Unclassified | chr15:31221236-31299514   | 76.279  |
| Chd3          | 0 | 0 | 0 | 803  | 13.38333  | 18.4209  | 2.013375 | Elongating   | chr11:69156774-69184928   | 26.155  |
| Rnf2          | 0 | 0 | 0 | 384  | 6.4       | 5.62407  | 17.20136 | Unclassified | chr1:153316535-153349953  | 31.419  |
| Olfr1445      | 0 | 0 | 0 | 0    | 0         | 0.067811 | 0        | Unclassified | chr19:12956372-12959317   | 0.946   |
| Olfr1453      | 0 | 0 | 0 | 0    | 0         | 0        | 0        | Unclassified | chr19:13101893-13104817   | 0.925   |
| Olfr1448      | 0 | 0 | 0 | 3    | 0.05      | 0        | 2        | Unclassified | chr19:12993852-12996797   | 0.946   |
| Olfr1444      | 0 | 0 | 0 | 1    | 0.016667  | 0.053401 | 0        | Unclassified | chr19:12934266-12937226   | 0.961   |
| Olfr1469      | 0 | 0 | 0 | 2    | 0.033333  | 0        | 1        | Unclassified | chr19:13483060-13485990   | 0.931   |
| Olfr1477      | 0 | 0 | 0 | 1    | 0.016667  | 0.005812 | 0        | Unclassified | chr19:13573035-13577782   | 2.748   |
| Olfr1442      | 0 | 0 | 0 | 2    | 0.033333  | 0.072341 | 0        | Unclassified | chr19:12746668-12749731   | 1.064   |
| Olfr1443      | 0 | 0 | 0 | 6    | 0.1       | 0.03398  | 0.483524 | Unclassified | chr19:12750655-12758335   | 5.681   |
| Dcpp3         | 0 | 0 | 0 | 1    | 0.016667  | 0        | 1        | Unclassified | chr17:24052424-24056408   | 1.985   |
| Olfr1446      | 0 | 0 | 0 | 0    | 0         | 0        | 0        | Unclassified | chr19:12964138-12967065   | 0.928   |
| Zfp160        | 0 | 0 | 0 | 283  | 4.716667  | 1.65134  | 17.91801 | Unclassified | chr17:21143904-21165820   | 19.917  |
| Tmprss11b     | 0 | 0 | 0 | 11   | 0.183333  | 0.017351 | 0.612072 | Unclassified | chr5:87088546-87107323    | 16.778  |
| Sclo1a4       | 0 | 0 | 0 | 28   | 0.466667  | 0.016762 | 1.313377 | Unclassified | chr6:141753960-141806692  | 50.733  |
| Gcnt2         | 0 | 0 | 0 | 132  | 2.2       | 0.526289 | 1.759766 | Unclassified | chr13:40953500-41056261   | 100.762 |
| Opn1mw        | 0 | 0 | 0 | 18   | 0.3       | 0.042021 | 0.567331 | Unclassified | chrX:71370804-71396094    | 23.291  |



|                  |   |         |   |      |          |          |          |              |                           |         |
|------------------|---|---------|---|------|----------|----------|----------|--------------|---------------------------|---------|
| <b>Sico1a6</b>   | 0 | 0       | 0 | 25   | 0.416667 | 0.009141 | 0        | Unclassified | chr6:142034288-142136670  | 100.383 |
| <b>Kat2a</b>     | 0 | 0       | 0 | 326  | 5.433333 | 16.2295  | 7.133749 | Unclassified | chr11:100566061-100575766 | 7.706   |
| <b>Nr6a1</b>     | 0 | 0       | 0 | 351  | 5.85     | 0.946844 | 14.68755 | Stalled      | chr2:38578894-38783981    | 203.088 |
| <b>Gcnt1</b>     | 0 | 0       | 0 | 130  | 2.166667 | 0.492831 | 17.86225 | Stalled      | chr19:17400632-17433157   | 30.526  |
| <b>Gcm1</b>      | 0 | 0       | 0 | 20   | 0.333333 | 0.056709 | 0.426992 | Unclassified | chr9:77897764-77913431    | 13.668  |
| <b>Fastk</b>     | 0 | 0       | 0 | 563  | 9.383333 | 25.3917  | 6.861698 | Unclassified | chr5:23946857-23953053    | 4.197   |
| <b>38776</b>     | 0 | 92.8038 | 0 | 1371 | 22.85    | 2.32975  | 0        | Unclassified | chr8:68140423-68995535    | 853.113 |
| <b>Clps</b>      | 0 | 0       | 0 | 4    | 0.066667 | 0.051888 | 0.333629 | Unclassified | chr17:28695158-28699659   | 2.502   |
| <b>Myh3</b>      | 0 | 0       | 0 | 47   | 0.783333 | 0.065537 | 0.343215 | Unclassified | chr11:66889801-66915793   | 23.993  |
| <b>Myh2</b>      | 0 | 0       | 0 | 18   | 0.3      | 0.032017 | 1.259095 | Unclassified | chr11:66982528-67011018   | 26.491  |
| <b>Myh8</b>      | 0 | 0       | 0 | 24   | 0.4      | 0.032536 | 0        | Unclassified | chr11:67088625-67122135   | 31.511  |
| <b>Myh4</b>      | 0 | 0       | 0 | 17   | 0.283333 | 0.03251  | 0.57241  | Unclassified | chr11:67049530-67073948   | 22.419  |
| <b>Stxbp5l</b>   | 0 | 0       | 0 | 137  | 2.283333 | 0.04635  | 1.35397  | Unclassified | chr16:37107395-37387044   | 277.65  |
| <b>BC018465</b>  | 0 | 0       | 0 | 42   | 0.7      | 0.070549 | 0.59675  | Unclassified | chr2:154047477-154066636  | 17.16   |
| <b>Prpsap2</b>   | 0 | 0       | 0 | 464  | 7.733333 | 4.37206  | 12.82936 | Unclassified | chr11:61543151-61577590   | 32.44   |
| <b>BC06028</b>   | 0 | 0       | 0 | 47   | 0.783333 | 0.28847  | 10.89643 | Stalled      | chr7:147995575-148010077  | 12.503  |
| <b>U46068</b>    | 0 | 0       | 0 | 51   | 0.85     | 0        | 0.745541 | Unclassified | chr2:154014553-154046079  | 29.527  |
| <b>BC053393</b>  | 0 | 0       | 0 | 9    | 0.15     | 0.018829 | 0.70489  | Unclassified | chr11:46383014-46402733   | 17.72   |
| <b>Slc25a13</b>  | 0 | 0       | 0 | 906  | 15.1     | 3.87907  | 14.67978 | Unclassified | chr6:5991217-6169118      | 175.902 |
| <b>Ap2s1</b>     | 0 | 0       | 0 | 213  | 3.55     | 102.235  | 5.106707 | Unclassified | chr7:17321792-17334639    | 10.848  |
| <b>Prssl1</b>    | 0 | 0       | 0 | 25   | 0.416667 | 0.042414 | 1.594175 | Unclassified | chr10:79244218-79253730   | 7.513   |
| <b>Stk31</b>     | 0 | 0       | 0 | 25   | 0.416667 | 0.019791 | 0.760167 | Unclassified | chr6:49343602-49419501    | 73.9    |
| <b>Parp16</b>    | 0 | 0       | 0 | 117  | 1.95     | 1.81087  | 12.91375 | Stalled      | chr9:65060496-65087026    | 24.531  |
| <b>Slc22a23</b>  | 0 | 0       | 0 | 338  | 5.633333 | 5.00212  | 0.330696 | Unclassified | chr13:34271026-34439051   | 166.026 |
| <b>Kidins220</b> | 0 | 0       | 0 | 775  | 12.91667 | 8.28397  | 13.20659 | Unclassified | chr12:25657796-25744562   | 84.767  |
| <b>Olfr91</b>    | 0 | 0       | 0 | 4    | 0.066667 | 0.046628 | 3        | Unclassified | chr17:37229880-37232817   | 0.938   |
| <b>Olfr891</b>   | 0 | 0       | 0 | 0    | 0        | 0.053907 | 0        | Unclassified | chr9:37987455-37990406    | 0.952   |
| <b>Olfr890</b>   | 0 | 0       | 0 | 2    | 0.033333 | 0.029914 | 2        | Unclassified | chr9:37948721-37951666    | 0.946   |
| <b>Olfr889</b>   | 0 | 0       | 0 | 1    | 0.016667 | 0.030396 | 1        | Unclassified | chr9:37921382-37924312    | 0.931   |
| <b>Olfr197</b>   | 0 | 0       | 0 | 0    | 0        | 0        | 0        | Unclassified | chr16:59185381-59188307   | 0.927   |
| <b>Olfr183</b>   | 0 | 0       | 0 | 6    | 0.1      | 0        | 0.457348 | Unclassified | chr16:58993229-59000442   | 5.214   |
| <b>Olfr203</b>   | 0 | 0       | 0 | 1    | 0.016667 | 0.041772 | 0        | Unclassified | chr16:59300980-59303899   | 0.92    |
| <b>Aldh7a1</b>   | 0 | 0       | 0 | 424  | 7.066667 | 3.88575  | 32.05716 | Stalled      | chr18:56685389-56734593   | 47.205  |
| <b>Myl2</b>      | 0 | 0       | 0 | 13   | 0.216667 | 0.161976 | 0.655553 | Unclassified | chr5:122548988-122556863  | 5.876   |
| <b>H2-M10.3</b>  | 0 | 0       | 0 | 3    | 0.05     | 0        | 0.546999 | Unclassified | chr17:36501948-36507362   | 3.415   |
| <b>Olfr1234</b>  | 0 | 0       | 0 | 0    | 0        | 0        | 0        | Unclassified | chr2:89202639-89205584    | 0.946   |
| <b>Eif2ak2</b>   | 0 | 0       | 0 | 1119 | 18.65    | 8.32082  | 6.572523 | Unclassified | chr17:79251889-79283912   | 30.024  |
| <b>Prkx</b>      | 0 | 0       | 0 | 225  | 3.75     | 4.14311  | 32.38895 | Stalled      | chrX:75007373-75043299    | 33.927  |
| <b>Prl</b>       | 0 | 0       | 0 | 5    | 0.083333 | 0.115333 | 0.688571 | Unclassified | chr13:27147438-27157070   | 7.633   |
| <b>Pnc1</b>      | 0 | 0       | 0 | 190  | 3.166667 | 2.80657  | 0.179904 | Unclassified | chr6:122267748-122289033  | 19.286  |
| <b>Ankrd1</b>    | 0 | 0       | 0 | 11   | 0.183333 | 0.116182 | 1.487141 | Unclassified | chr19:36186454-36196334   | 7.881   |
| <b>Mylpf</b>     | 0 | 0       | 0 | 95   | 1.583333 | 2.30864  | 0.57176  | Unclassified | chr7:134353121-134357801  | 2.681   |
| <b>Plk1s1</b>    | 0 | 0       | 0 | 278  | 4.633333 | 3.48674  | 37.83776 | Stalled      | chr2:146679624-146795825  | 114.202 |
| <b>Nkx2-4</b>    | 0 | 0       | 0 | 9    | 0.15     | 0.535504 | 0        | Unclassified | chr2:146909611-146913081  | 1.471   |
| <b>Ctf2</b>      | 0 | 0       | 0 | 22   | 0.366667 | 0.042721 | 0.783729 | Unclassified | chr7:134862473-134871130  | 6.658   |
| <b>Siah1a</b>    | 0 | 0       | 0 | 333  | 5.55     | 1.41346  | 22.51591 | Unclassified | chr8:89247838-89271905    | 22.068  |
| <b>Cdh20</b>     | 0 | 0       | 0 | 115  | 1.916667 | 0.117076 | 0.666336 | Unclassified | chr1:106663395-106892058  | 226.664 |
| <b>Wdr35</b>     | 0 | 0       | 0 | 169  | 2.816667 | 1.80847  | 30.58468 | Stalled      | chr12:8978806-9035652     | 54.847  |
| <b>Mih3</b>      | 0 | 0       | 0 | 219  | 3.65     | 1.31149  | 22.73816 | Stalled      | chr12:86575469-86613514   | 36.046  |
| <b>Aspa</b>      | 0 | 0       | 0 | 21   | 0.35     | 0.058484 | 0        | Unclassified | chr11:73118489-73140136   | 19.648  |
| <b>Adamts15</b>  | 0 | 0       | 0 | 27   | 0.45     | 0.045402 | 1.510124 | Unclassified | chr9:30706739-30732037    | 23.299  |
| <b>Acvr2a</b>    | 0 | 0       | 0 | 248  | 4.133333 | 1.17188  | 19.36403 | Stalled      | chr2:48667628-48758784    | 89.157  |
| <b>Nubpl</b>     | 0 | 0       | 0 | 393  | 6.55     | 3.59221  | 48.98464 | Stalled      | chr12:53196732-53411946   | 213.215 |
| <b>Fam54b</b>    | 0 | 0       | 0 | 207  | 3.45     | 8.70018  | 0.709702 | Unclassified | chr4:134081477-134090667  | 7.191   |
| <b>Plekha5</b>   | 0 | 0       | 0 | 819  | 13.65    | 2.33435  | 9.151075 | Unclassified | chr6:140370619-140543427  | 170.809 |
| <b>Eif2ak4</b>   | 0 | 0       | 0 | 930  | 15.5     | 6.06322  | 10.19468 | Unclassified | chr2:118212352-118300969  | 86.618  |
| <b>Fam49a</b>    | 0 | 0       | 0 | 448  | 7.466667 | 0.708712 | 18.62584 | Stalled      | chr12:12266944-12383165   | 114.222 |
| <b>Ppfia4</b>    | 0 | 0       | 0 | 110  | 1.833333 | 0.354835 | 4.113979 | Unclassified | chr1:136193360-136231505  | 36.146  |
| <b>Lrrn4cl</b>   | 0 | 0       | 0 | 17   | 0.283333 | 0.116585 | 2.685097 | Unclassified | chr19:8923274-8928399     | 3.126   |
| <b>Dok5</b>      | 0 | 0       | 0 | 121  | 2.016667 | 0.144964 | 0        | Unclassified | chr2:170555306-170705275  | 147.97  |
| <b>Klhdc8a</b>   | 0 | 0       | 0 | 22   | 0.366667 | 0.423308 | 1.700831 | Unclassified | chr1:134193202-134203934  | 8.733   |
| <b>Mupcdh</b>    | 0 | 0       | 0 | 32   | 0.533333 | 0.255497 | 1.167648 | Unclassified | chr7:148454983-148464685  | 7.703   |
| <b>Ttc24</b>     | 0 | 0       | 0 | 13   | 0.216667 | 0.028468 | 0.417866 | Unclassified | chr3:87873331-87884226    | 8.896   |
| <b>Prss45</b>    | 0 | 0       | 0 | 19   | 0.316667 | 0.03092  | 0.251892 | Unclassified | chr9:110735091-110743814  | 6.724   |
| <b>Kcng1</b>     | 0 | 0       | 0 | 18   | 0.3      | 0.121744 | 0        | Unclassified | chr2:168087197-168096831  | 7.635   |
| <b>Peli3</b>     | 0 | 0       | 0 | 32   | 0.533333 | 0.172031 | 2.464334 | Unclassified | chr19:4931854-4945092     | 11.239  |
| <b>Phactr1</b>   | 0 | 0       | 0 | 402  | 6.7      | 0.09543  | 0        | Unclassified | chr13:42773991-43233881   | 457.891 |
| <b>Limch1</b>    | 0 | 0       | 0 | 308  | 5.133333 | 0.114767 | 2.538118 | Unclassified | chr5:67135078-67448398    | 311.321 |
| <b>Usp4</b>      | 0 | 0       | 0 | 938  | 15.63333 | 28.6467  | 19.03389 | Unclassified | chr9:108248161-108294860  | 44.7    |
| <b>Kit</b>       | 0 | 0       | 0 | 83   | 1.383333 | 0.096705 | 4.852701 | Unclassified | chr5:75969011-76052746    | 81.736  |
| <b>Kl</b>        | 0 | 0       | 0 | 44   | 0.733333 | 0.030085 | 1.485334 | Unclassified | chr5:151753181-151796386  | 41.206  |
| <b>Klc2</b>      | 0 | 0       | 0 | 172  | 2.866667 | 5.30875  | 7.485425 | Unclassified | chr19:5107745-5120408     | 10.664  |
| <b>Taf7l</b>     | 0 | 0       | 0 | 13   | 0.216667 | 0        | 0        | Unclassified | chrX:130994654-131013029  | 16.376  |
| <b>Klf1</b>      | 0 | 0       | 0 | 106  | 1.766667 | 5.40419  | 0.465307 | Unclassified | chr8:87423826-87429194    | 3.369   |
| <b>Klf12</b>     | 0 | 0       | 0 | 435  | 7.25     | 0.40235  | 3.160156 | Unclassified | chr14:100269861-100551015 | 279.155 |
| <b>Lgi2</b>      | 0 | 0       | 0 | 26   | 0.433333 | 0.033255 | 0.523065 | Unclassified | chr5:52929102-52959519    | 28.418  |
| <b>Pramel4</b>   | 0 | 0       | 0 | 1    | 0.016667 | 0.028379 | 1        | Unclassified | chr4:143647028-143659221  | 10.194  |
| <b>Nrn1l</b>     | 0 | 0       | 0 | 118  | 1.966667 | 0.380683 | 2.886313 | Unclassified | chr8:108415469-108418915  | 1.447   |
| <b>Cidea</b>     | 0 | 0       | 0 | 23   | 0.383333 | 0.671646 | 1.050461 | Unclassified | chr18:67501217-67527448   | 24.232  |
| <b>Cideb</b>     | 0 | 0       | 0 | 169  | 2.816667 | 0.112934 | 0.955934 | Unclassified | chr14:56372891-56379261   | 4.371   |
| <b>Tmem38b</b>   | 0 | 0       | 0 | 135  | 2.25     | 6.85525  | 9.836423 | Unclassified | chr4:53836933-53873461    | 34.529  |
| <b>Fabp9</b>     | 0 | 0       | 0 | 3    | 0.05     | 0.043817 | 0        | Unclassified | chr3:10193623-10199222    | 3.6     |
| <b>Tle1</b>      | 0 | 0       | 0 | 368  | 6.133333 | 3.70547  | 33.40721 | Stalled      | chr4:71778175-71863953    | 83.779  |
| <b>Fam57a</b>    | 0 | 0       | 0 | 113  | 1.883333 | 3.91342  | 4.547838 | Unclassified | chr11:76013557-76021759   | 6.203   |
| <b>Olfr1233</b>  | 0 | 0       | 0 | 2    | 0.033333 | 0.041883 | 1        | Unclassified | chr2:89179539-89182457    | 0.919   |
| <b>Mrgprb5</b>   | 0 | 0       | 0 | 2    | 0.033333 | 0        | 0        | Unclassified | chr7:55423386-55426355    | 0.97    |

|                      |   |   |   |      |           |          |          |              |                           |         |
|----------------------|---|---|---|------|-----------|----------|----------|--------------|---------------------------|---------|
| <b>Mrgprb3</b>       | 0 | 0 | 0 | 1    | 0.016667  | 0.081894 | 0        | Unclassified | chr7:55898232-55901171    | 0.94    |
| <b>Slc12a5</b>       | 0 | 0 | 0 | 205  | 3.416667  | 0.247779 | 0.134997 | Unclassified | chr2:164791487-164825231  | 31.745  |
| <b>Gprc5d</b>        | 0 | 0 | 0 | 16   | 0.266667  | 0.038926 | 0        | Unclassified | chr6:135056008-135070301  | 12.294  |
| <b>Edn3</b>          | 0 | 0 | 0 | 30   | 0.5       | 0.112462 | 0        | Unclassified | chr2:174584273-174609543  | 23.271  |
| <b>Olf414</b>        | 0 | 0 | 0 | 2    | 0.033333  | 0.053681 | 1        | Unclassified | chr1:176358560-176361515  | 0.956   |
| <b>Chrn3</b>         | 0 | 0 | 0 | 28   | 0.466667  | 0.042317 | 0.526482 | Unclassified | chr8:28477182-28510201    | 31.02   |
| <b>Mic1</b>          | 0 | 0 | 0 | 26   | 0.433333  | 0.027515 | 0.485125 | Unclassified | chr15:88786313-88810983   | 22.671  |
| <b>Rnaseh1</b>       | 0 | 0 | 0 | 466  | 7.766667  | 16.8403  | 17.3993  | Unclassified | chr12:29332466-29344454   | 9.989   |
| <b>Pth2r</b>         | 0 | 0 | 0 | 43   | 0.716667  | 0.047783 | 1.316175 | Unclassified | chr1:65355830-65435818    | 77.989  |
| <b>Lrch2</b>         | 0 | 0 | 0 | 18   | 0.3       | 0.017722 | 0        | Unclassified | chrX:143906236-143990624  | 82.389  |
| <b>Irs4</b>          | 0 | 0 | 0 | 10   | 0.166667  | 0.061538 | 0        | Unclassified | chrX:138145540-138161760  | 14.221  |
| <b>Irx1</b>          | 0 | 0 | 0 | 11   | 0.183333  | 0.087017 | 0.42819  | Unclassified | chr13:72095679-72103171   | 5.493   |
| <b>Irx2</b>          | 0 | 0 | 0 | 8    | 0.133333  | 0.070242 | 1.372749 | Unclassified | chr13:72764425-72771642   | 5.218   |
| <b>Dnajb14</b>       | 0 | 0 | 0 | 430  | 7.166667  | 2.03546  | 87.01588 | Stalled      | chr3:137528638-137571895  | 41.258  |
| <b>Mmaa</b>          | 0 | 0 | 0 | 655  | 10.91667  | 0.725371 | 90.77709 | Stalled      | chr8:81790322-81820855    | 28.534  |
| <b>Gm1965</b>        | 0 | 0 | 0 | 6    | 0.1       | 0.048639 | 1.001622 | Unclassified | chr6:89088998-89096010    | 5.013   |
| <b>Rb1cc1</b>        | 0 | 0 | 0 | 467  | 7.833333  | 1.69281  | 93.31667 | Stalled      | chr1:6202742-6266185      | 61.444  |
| <b>Pxt1</b>          | 0 | 0 | 0 | 19   | 0.316667  | 0.126269 | 3.81097  | Unclassified | chr17:29070930-29081207   | 8.278   |
| <b>Dctn2</b>         | 0 | 0 | 0 | 492  | 8.2       | 42.2208  | 5.230269 | Unclassified | chr10:126701454-126718863 | 15.41   |
| <b>Pir</b>           | 0 | 0 | 0 | 58   | 0.966667  | 0.336138 | 6.128996 | Unclassified | chrX:160705368-160810837  | 103.47  |
| <b>Dynlr2</b>        | 0 | 0 | 0 | 45   | 0.75      | 0.099544 | 13.7383  | Stalled      | chr8:119026914-119039815  | 10.902  |
| <b>Olf1031</b>       | 0 | 0 | 0 | 1    | 0.016667  | 0        | 1        | Unclassified | chr2:85829975-85832986    | 1.012   |
| <b>Olf314</b>        | 0 | 0 | 0 | 4    | 0.066667  | 0        | 0        | Unclassified | chr11:58597737-58600730   | 0.994   |
| <b>Olf663</b>        | 0 | 0 | 0 | 0    | 0         | 0        | 0        | Unclassified | chr7:111850082-111853117  | 1.036   |
| <b>Olf948</b>        | 0 | 0 | 0 | 1    | 0.016667  | 0        | 0        | Unclassified | chr9:39126231-39129197    | 0.967   |
| <b>Mutyh</b>         | 0 | 0 | 0 | 461  | 7.683333  | 4.85699  | 25.29252 | Unclassified | chr4:116478338-116492035  | 11.698  |
| <b>BC051019</b>      | 0 | 0 | 0 | 74   | 1.233333  | 0.026398 | 0.269544 | Unclassified | chr7:116855694-116869285  | 11.592  |
| <b>Srd5a3</b>        | 0 | 0 | 0 | 346  | 5.766667  | 4.89907  | 28.59915 | Stalled      | chr5:76567301-76584496    | 15.196  |
| <b>Was</b>           | 0 | 0 | 0 | 292  | 4.866667  | 47.2898  | 8.490672 | Unclassified | chrX:7658591-7669617      | 9.027   |
| <b>Tspyl3</b>        | 0 | 0 | 0 | 227  | 3.783333  | 9.27234  | 15.44188 | Stalled      | chr2:153048113-153053177  | 3.065   |
| <b>Tldr3</b>         | 0 | 0 | 0 | 928  | 15.46667  | 2.34387  | 82.83331 | Stalled      | chr14:87814389-87945315   | 128.927 |
| <b>Slc25a38</b>      | 0 | 0 | 0 | 419  | 6.983333  | 11.8255  | 20.27018 | Unclassified | chr9:120017516-120033437  | 13.922  |
| <b>Pou4f2</b>        | 0 | 0 | 0 | 11   | 0.183333  | 0.153606 | 0.305957 | Unclassified | chr8:80956907-80962551    | 3.645   |
| <b>She</b>           | 0 | 0 | 0 | 60   | 1         | 0.109331 | 1.316003 | Unclassified | chr3:89633291-89662767    | 27.477  |
| <b>Gja6</b>          | 0 | 0 | 0 | 3    | 0.05      | 0        | 0.797489 | Unclassified | chrX:157340047-157346984  | 4.938   |
| <b>Clyx</b>          | 0 | 0 | 0 | 486  | 8.1       | 9.80931  | 25.48572 | Unclassified | chr9:65140101-65178465    | 36.365  |
| <b>Syt3</b>          | 0 | 0 | 0 | 34   | 0.566667  | 0.072614 | 1.867639 | Unclassified | chr7:51637495-51655400    | 15.906  |
| <b>Ankib1</b>        | 0 | 0 | 0 | 1034 | 17.233333 | 5.74796  | 51.27854 | Unclassified | chr5:3689999-3805109      | 113.111 |
| <b>Wfdc6a</b>        | 0 | 0 | 0 | 8    | 0.133333  | 0        | 0        | Unclassified | chr2:164405021-164412677  | 5.657   |
| <b>Isg15</b>         | 0 | 0 | 0 | 176  | 2.933333  | 56.1195  | 1.997264 | Elongating   | chr4:155573532-155576927  | 1.396   |
| <b>Spo11</b>         | 0 | 0 | 0 | 58   | 0.966667  | 0.312403 | 0.599473 | Unclassified | chr2:172803342-172819077  | 13.736  |
| <b>Zwilch</b>        | 0 | 0 | 0 | 829  | 13.81667  | 7.70983  | 39.33199 | Unclassified | chr9:63984952-64022738    | 35.787  |
| <b>Murc</b>          | 0 | 0 | 0 | 13   | 0.216667  | 0.01254  | 0.898899 | Unclassified | chr4:48674385-48686364    | 9.98    |
| <b>Caps2</b>         | 0 | 0 | 0 | 22   | 0.366667  | 0.030156 | 0        | Unclassified | chr10:111600731-111653611 | 50.881  |
| <b>Trat1</b>         | 0 | 0 | 0 | 29   | 0.483333  | 0.056212 | 0.564324 | Unclassified | chr16:48734802-48774069   | 37.268  |
| <b>Cenpj</b>         | 0 | 0 | 0 | 270  | 4.5       | 2.59953  | 23.66219 | Stalled      | chr14:57145597-57192683   | 45.087  |
| <b>Eya4</b>          | 0 | 0 | 0 | 144  | 2.4       | 0.031267 | 0        | Unclassified | chr10:22823973-23071709   | 245.737 |
| <b>Ezh2</b>          | 0 | 0 | 0 | 2033 | 33.88333  | 40.7986  | 25.90114 | Unclassified | chr6:47480274-47547029    | 64.756  |
| <b>Ezh1</b>          | 0 | 0 | 0 | 357  | 5.95      | 3.88289  | 9.22116  | Unclassified | chr11:101052429-101089764 | 35.336  |
| <b>Fbxo4</b>         | 0 | 0 | 0 | 355  | 5.916667  | 3.06085  | 42.55115 | Stalled      | chr15:3913564-3931573     | 16.01   |
| <b>Rph3al</b>        | 0 | 0 | 0 | 301  | 5.016667  | 1.95442  | 0.837605 | Unclassified | chr11:75645659-75726528   | 78.87   |
| <b>Tlcd2</b>         | 0 | 0 | 0 | 84   | 1.4       | 5.688    | 22.98861 | Stalled      | chr11:75279580-75284146   | 2.567   |
| <b>Olf1373</b>       | 0 | 0 | 0 | 3    | 0.05      | 0.026155 | 0        | Unclassified | chr11:51958094-51961030   | 0.937   |
| <b>Ms4a3</b>         | 0 | 0 | 0 | 8    | 0.133333  | 0.025329 | 0        | Unclassified | chr19:11703986-11717324   | 11.339  |
| <b>Cds1</b>          | 0 | 0 | 0 | 112  | 1.866667  | 0.438242 | 4.448178 | Unclassified | chr5:102192148-102252871  | 58.724  |
| <b>Mks1</b>          | 0 | 0 | 0 | 248  | 4.133333  | 3.72161  | 18.46337 | Stalled      | chr11:87664726-87677181   | 10.456  |
| <b>Arhgef15</b>      | 0 | 0 | 0 | 39   | 0.65      | 0.26649  | 0.255623 | Unclassified | chr11:68756655-68772360   | 13.706  |
| <b>Fas</b>           | 0 | 0 | 0 | 294  | 4.9       | 11.2711  | 12.90227 | Stalled      | chr19:34363148-34402260   | 37.113  |
| <b>Lrig3</b>         | 0 | 0 | 0 | 56   | 0.933333  | 0.155691 | 1.962136 | Unclassified | chr10:125401274-125452415 | 49.142  |
| <b>Prpf3</b>         | 0 | 0 | 0 | 579  | 9.65      | 15.0032  | 27.13674 | Unclassified | chr3:95634544-95661676    | 25.133  |
| <b>Gzmk</b>          | 0 | 0 | 0 | 7    | 0.116667  | 0.194187 | 0.572193 | Unclassified | chr13:113962081-113973105 | 9.025   |
| <b>Foxn2</b>         | 0 | 0 | 0 | 942  | 15.7      | 2.65358  | 16.38244 | Unclassified | chr17:88838051-88889873   | 49.823  |
| <b>Pou3f4</b>        | 0 | 0 | 0 | 1    | 0.016667  | 0.141617 | 1        | Unclassified | chrX:108007803-108010889  | 1.087   |
| <b>Olf913</b>        | 0 | 0 | 0 | 1    | 0.016667  | 0        | 0        | Unclassified | chr9:38399807-38402746    | 0.94    |
| <b>Foxi1</b>         | 0 | 0 | 0 | 15   | 0.25      | 0.038111 | 0.431373 | Unclassified | chr11:34104340-34110089   | 3.75    |
| <b>Sfmbt1</b>        | 0 | 0 | 0 | 804  | 13.4      | 2.01375  | 6.698563 | Unclassified | chr14:31526034-31635907   | 107.874 |
| <b>Gzmf</b>          | 0 | 0 | 0 | 4    | 0.066667  | 0.032732 | 0        | Unclassified | chr14:56824099-56832244   | 6.146   |
| <b>Cacna1f</b>       | 0 | 0 | 0 | 19   | 0.316667  | 0.06962  | 0.628727 | Unclassified | chrX:7182228-7212322      | 28.095  |
| <b>Scara5</b>        | 0 | 0 | 0 | 117  | 1.95      | 0.058509 | 0.456476 | Unclassified | chr14:66283239-66383660   | 98.422  |
| <b>Golga7b</b>       | 0 | 0 | 0 | 31   | 0.516667  | 0.136247 | 0.428808 | Unclassified | chr19:42320067-42344837   | 22.771  |
| <b>Skiv2l</b>        | 0 | 0 | 0 | 410  | 6.833333  | 19.591   | 6.212134 | Unclassified | chr17:34976170-34989149   | 10.98   |
| <b>Dhrs2</b>         | 0 | 0 | 0 | 18   | 0.3       | 0.040271 | 0.520248 | Unclassified | chr14:55838843-55860277   | 19.435  |
| <b>Foxf2</b>         | 0 | 0 | 0 | 15   | 0.25      | 0.403551 | 0        | Unclassified | chr13:31715684-31723275   | 5.592   |
| <b>1700101E01Rik</b> | 0 | 0 | 0 | 38   | 0.633333  | 1.81258  | 1.896512 | Unclassified | chr2:28907416-28912586    | 3.171   |
| <b>Pctg1</b>         | 0 | 0 | 0 | 191  | 3.183333  | 11.7586  | 22.05882 | Stalled      | chr11:43233751-43241750   | 6       |
| <b>Rc3h1</b>         | 0 | 0 | 0 | 839  | 13.98333  | 1.6708   | 28.32625 | Unclassified | chr1:162834541-162905107  | 68.567  |
| <b>Sdf4</b>          | 0 | 0 | 0 | 990  | 16.5      | 18.4688  | 12.05257 | Unclassified | chr4:155365022-155387719  | 20.698  |
| <b>1700065D16Rik</b> | 0 | 0 | 0 | 204  | 3.4       | 4.62592  | 9.989352 | Unclassified | chr9:95755968-95760739    | 2.772   |
| <b>Zkscan1</b>       | 0 | 0 | 0 | 678  | 11.3      | 1.42117  | 9.61133  | Unclassified | chr5:138524311-138549050  | 22.74   |
| <b>Pdc</b>           | 0 | 0 | 0 | 10   | 0.166667  | 0.072702 | 0        | Unclassified | chr1:152164546-152181035  | 14.49   |
| <b>Fam176a</b>       | 0 | 0 | 0 | 55   | 0.916667  | 0.07974  | 0.492549 | Unclassified | chr6:81989621-82043093    | 51.473  |
| <b>Poir2c</b>        | 0 | 0 | 0 | 291  | 4.85      | 14.5071  | 4.912581 | Unclassified | chr8:97379349-97388138    | 6.79    |
| <b>Dnase2b</b>       | 0 | 0 | 0 | 44   | 0.733333  | 0.022309 | 0.435888 | Unclassified | chr3:146244337-146280562  | 34.226  |
| <b>Zfp330</b>        | 0 | 0 | 0 | 423  | 7.05      | 18.2894  | 17.08008 | Unclassified | chr8:85287518-85300025    | 10.508  |
| <b>BC048671</b>      | 0 | 0 | 0 | 10   | 0.166667  | 0.044194 | 0.346405 | Unclassified | chr6:90249263-90255442    | 4.18    |
| <b>Tex11</b>         | 0 | 0 | 0 | 51   | 0.85      | 0.017254 | 0        | Unclassified | chrX:98033986-98256978    | 220.993 |

|               |   |   |   |      |          |          |          |              |                           |          |
|---------------|---|---|---|------|----------|----------|----------|--------------|---------------------------|----------|
| Tex16         | 0 | 0 | 0 | 5    | 0.083333 | 0.012907 | 0        | Unclassified | chrX:109205128-109240935  | 33.808   |
| Slc25a2       | 0 | 0 | 0 | 73   | 1.216667 | 0.095218 | 7.688112 | Unclassified | chr18:37797031-37800377   | 1.347    |
| Tktl1         | 0 | 0 | 0 | 15   | 0.25     | 0.025934 | 0        | Unclassified | chrX:71420597-71453837    | 31.241   |
| Serpina6      | 0 | 0 | 0 | 14   | 0.233333 | 0        | 1.023914 | Unclassified | chr12:104884841-104897281 | 10.441   |
| Musk          | 0 | 0 | 0 | 96   | 1.6      | 0.093298 | 1.948066 | Unclassified | chr4:58296833-58387175    | 88.343   |
| Nsg1          | 0 | 0 | 0 | 214  | 3.566667 | 0.191646 | 0.187226 | Unclassified | chr5:38528431-38552706    | 22.276   |
| Nsg2          | 0 | 0 | 0 | 112  | 1.866667 | 0.365691 | 1.752557 | Unclassified | chr11:31898458-31959202   | 58.745   |
| Nsdhl         | 0 | 0 | 0 | 225  | 3.75     | 14.7322  | 25.58233 | Stalled      | chrX:70161859-70203867    | 40.009   |
| Nsf           | 0 | 0 | 0 | 1256 | 20.93333 | 7.3787   | 30.11128 | Unclassified | chr11:103683096-103817370 | 132.275  |
| Rims3         | 0 | 0 | 0 | 67   | 1.116667 | 0.577194 | 0.688966 | Unclassified | chr4:120548473-120564165  | 13.693   |
| Nsd1          | 0 | 0 | 0 | 2262 | 37.7     | 9.37632  | 1.031137 | Elongating   | chr13:55309142-55419686   | 108.545  |
| Nrxn3         | 0 | 0 | 0 | 647  | 10.78333 | 0.049173 | 0.68123  | Unclassified | chr12:90189833-91573373   | 1381.541 |
| App1          | 0 | 0 | 0 | 612  | 10.2     | 4.08288  | 40.38489 | Unclassified | chr14:27732173-27785737   | 51.565   |
| Tor1b         | 0 | 0 | 0 | 407  | 6.783333 | 9.3968   | 6.411917 | Unclassified | chr2:30806520-30814535    | 6.016    |
| Wdr60         | 0 | 0 | 0 | 117  | 1.95     | 1.15595  | 13.64622 | Stalled      | chr12:117445522-117503498 | 55.977   |
| Mpa2l         | 0 | 0 | 0 | 38   | 0.633333 | 1.28597  | 10.42085 | Stalled      | chr5:105699720-105724718  | 22.999   |
| Insig2        | 0 | 0 | 0 | 429  | 7.15     | 4.9622   | 49.68699 | Stalled      | chr1:123200929-123226339  | 23.411   |
| Prdm6         | 0 | 0 | 0 | 95   | 1.583333 | 0.098549 | 2.824006 | Unclassified | chr18:53622199-53735511   | 111.313  |
| Kcnh7         | 0 | 0 | 0 | 228  | 3.8      | 0.050617 | 0.679081 | Unclassified | chr2:62541002-63024344    | 481.343  |
| Pde6d         | 0 | 0 | 0 | 356  | 5.933333 | 16.3943  | 26.57443 | Stalled      | chr1:88439589-88481076    | 39.488   |
| Bri3          | 0 | 0 | 0 | 238  | 3.966667 | 12.3457  | 5.917594 | Unclassified | chr5:145014093-145025442  | 9.35     |
| Ces2          | 0 | 0 | 0 | 2    | 0.033333 | 0.109056 | 2        | Unclassified | chr8:107368985-107378368  | 7.384    |
| Aebp2         | 0 | 0 | 0 | 1444 | 24.06667 | 21.1852  | 13.0778  | Unclassified | chr6:140570209-140625939  | 53.731   |
| Asgr2         | 0 | 0 | 0 | 17   | 0.283333 | 0.065389 | 0        | Unclassified | chr11:69904145-69919688   | 13.544   |
| Sl100a10      | 0 | 0 | 0 | 121  | 2.016667 | 22.3387  | 10.19839 | Stalled      | chr3:93357038-93368567    | 9.53     |
| Gm6994        | 0 | 0 | 0 | 20   | 0.333333 | 0.121221 | 0.581378 | Unclassified | chr14:77879289-77908675   | 27.387   |
| Havcr1        | 0 | 0 | 0 | 31   | 0.516667 | 1.34464  | 0.494676 | Unclassified | chr11:46562669-46593078   | 28.41    |
| Acot4         | 0 | 0 | 0 | 17   | 0.283333 | 1.45328  | 2.827076 | Unclassified | chr12:85377328-85385673   | 6.346    |
| 38784         | 0 | 0 | 0 | 28   | 0.466667 | 2.12911  | 1.902073 | Unclassified | chr10:126493105-126499240 | 4.136    |
| Agap2         | 0 | 0 | 0 | 297  | 4.95     | 7.61822  | 0.315526 | Unclassified | chr10:126513962-126530225 | 14.264   |
| Slc12a8       | 0 | 0 | 0 | 411  | 6.85     | 0.206454 | 0.797389 | Unclassified | chr16:33516414-33664221   | 145.808  |
| Havcr2        | 0 | 0 | 0 | 33   | 0.55     | 0.108214 | 0        | Unclassified | chr11:46266432-46294756   | 28.325   |
| Timd2         | 0 | 0 | 0 | 608  | 10.13333 | 5.58278  | 0.231748 | Unclassified | chr11:46482461-46522606   | 38.146   |
| Nccrp1        | 0 | 0 | 0 | 8    | 0.133333 | 0.142404 | 3.633506 | Unclassified | chr7:29328615-29334273    | 3.659    |
| 1600021P15Rik | 0 | 0 | 0 | 122  | 2.033333 | 0.270359 | 2.840997 | Unclassified | chr16:28826261-28931784   | 103.524  |
| Ostn          | 0 | 0 | 0 | 44   | 0.733333 | 0.060645 | 1.018787 | Unclassified | chr16:27305726-27351295   | 43.57    |
| Ccdc64b       | 0 | 0 | 0 | 114  | 1.9      | 0        | 0.185008 | Unclassified | chr17:23795489-23805586   | 8.098    |
| Mms19         | 0 | 0 | 0 | 810  | 13.5     | 6.58411  | 16.00225 | Unclassified | chr19:42018196-42057626   | 37.431   |
| Ttlf6         | 0 | 0 | 0 | 30   | 0.5      | 0.051486 | 0.513969 | Unclassified | chr11:95993099-96026765   | 31.667   |
| H2-Q8         | 0 | 0 | 0 | 110  | 1.833333 | 81.703   | 1.645266 | Unclassified | chr17:35529043-35532577   | 1.535    |
| 2510009E07Rik | 0 | 0 | 0 | 73   | 1.216667 | 0.538358 | 8.062236 | Unclassified | chr16:21649119-21696738   | 45.62    |
| Tm9sf4        | 0 | 0 | 0 | 977  | 16.28333 | 11.3798  | 10.55434 | Unclassified | chr2:152985036-153036199  | 49.164   |
| Uba6          | 0 | 0 | 0 | 493  | 8.216667 | 2.04523  | 63.28894 | Stalled      | chr5:86539753-86603768    | 62.016   |
| Fbxl20        | 0 | 0 | 0 | 381  | 6.35     | 2.99409  | 30.52218 | Stalled      | chr11:97943867-98012930   | 67.064   |
| Supt7l        | 0 | 0 | 0 | 312  | 5.2      | 4.54417  | 15.28114 | Unclassified | chr5:31816942-31831135    | 12.194   |
| Fnd3c2        | 0 | 0 | 0 | 10   | 0.166667 | 0.005665 | 0.680034 | Unclassified | chrX:103430584-103452711  | 20.128   |
| Gm5127        | 0 | 0 | 0 | 35   | 0.583333 | 0.035424 | 0        | Unclassified | chrX:103776524-103905896  | 127.373  |
| Klraq1        | 0 | 0 | 0 | 642  | 10.7     | 7.06848  | 17.07611 | Unclassified | chr17:88927463-88987705   | 58.243   |
| Dcaf4         | 0 | 0 | 0 | 239  | 3.983333 | 6.39244  | 8.434141 | Unclassified | chr12:84859415-84882940   | 21.526   |
| Tdpoz3        | 0 | 0 | 0 | 0    | 0        | 0.052512 | 0        | Unclassified | chr3:93627941-93631039    | 1.099    |
| Tdpoz4        | 0 | 0 | 0 | 1    | 0.016667 | 0.019627 | 1        | Unclassified | chr3:93598319-93601432    | 1.114    |
| Mrgprb1       | 0 | 0 | 0 | 2    | 0.033333 | 0.033687 | 0        | Unclassified | chr7:55699482-55713712    | 12.231   |
| Cyp2d26       | 0 | 0 | 0 | 15   | 0.25     | 0.034369 | 1.374179 | Unclassified | chr15:82620536-82626675   | 4.14     |
| Mogat2        | 0 | 0 | 0 | 39   | 0.65     | 0.028931 | 1.078752 | Unclassified | chr7:106367593-106389121  | 19.529   |
| Zfp599        | 0 | 0 | 0 | 160  | 2.666667 | 1.53469  | 11.13209 | Stalled      | chr9:22051873-22066339    | 12.467   |
| Palld         | 0 | 0 | 0 | 268  | 4.466667 | 0.043153 | 0        | Unclassified | chr8:63993819-64383487    | 387.669  |
| Acot2         | 0 | 0 | 0 | 213  | 3.55     | 6.72344  | 21.94489 | Stalled      | chr12:85326810-85334823   | 6.014    |
| Zfp623        | 0 | 0 | 0 | 125  | 2.083333 | 0.783621 | 15.09771 | Stalled      | chr15:75769381-75779830   | 8.45     |
| Gins3         | 0 | 0 | 0 | 214  | 3.566667 | 6.45943  | 14.76247 | Stalled      | chr8:98155458-98168959    | 11.502   |
| 2700078E11Rik | 0 | 0 | 0 | 558  | 9.3      | 11.0959  | 44.48974 | Stalled      | chr19:60603768-60658884   | 53.117   |
| Snx18         | 0 | 0 | 0 | 406  | 6.766667 | 4.79754  | 14.91654 | Unclassified | chr13:114382387-114410772 | 26.386   |
| Hoxd4         | 0 | 0 | 0 | 11   | 0.183333 | 0.24143  | 0        | Unclassified | chr2:74558034-74567216    | 7.183    |
| Dzip3         | 0 | 0 | 0 | 616  | 10.26667 | 2.79316  | 130.0493 | Stalled      | chr16:48924340-48996225   | 69.886   |
| C330027C09Rik | 0 | 0 | 0 | 658  | 10.96667 | 7.35588  | 45.44602 | Unclassified | chr16:48992300-49019818   | 25.519   |
| Pcsk9         | 0 | 0 | 0 | 258  | 4.3      | 0.339384 | 0.307598 | Unclassified | chr4:106114938-106138930  | 21.993   |
| Cntn3         | 0 | 0 | 0 | 106  | 1.766667 | 0.029673 | 0        | Unclassified | chr6:102113299-102416661  | 301.363  |
| Olf768        | 0 | 0 | 0 | 1    | 0.016667 | 0        | 0        | Unclassified | chr10:128530089-128533028 | 0.94     |
| Olf770        | 0 | 0 | 0 | 0    | 0        | 0        | 0        | Unclassified | chr10:128569886-128572822 | 0.937    |
| Olf763        | 0 | 0 | 0 | 0    | 0        | 0.075681 | 0        | Unclassified | chr10:128446342-128449272 | 0.931    |
| Gyk           | 0 | 0 | 0 | 293  | 4.883333 | 1.48644  | 51.49121 | Stalled      | chrX:82947275-83024158    | 74.884   |
| Olf7131       | 0 | 0 | 0 | 1    | 0.016667 | 0        | 0        | Unclassified | chr17:38218976-38221921   | 0.946    |
| Olf71008      | 0 | 0 | 0 | 1    | 0.016667 | 0        | 0        | Unclassified | chr2:85527587-85530529    | 0.943    |
| Olf7992       | 0 | 0 | 0 | 0    | 0        | 0        | 0        | Unclassified | chr2:85239758-85242688    | 0.931    |
| Slc25a24      | 0 | 0 | 0 | 98   | 1.633333 | 1.49644  | 13.49177 | Stalled      | chr3:108924066-108971327  | 45.262   |
| Ascl2         | 0 | 0 | 0 | 17   | 0.283333 | 0.397529 | 1.16389  | Unclassified | chr7:150152726-150157169  | 2.444    |
| Dleu7         | 0 | 0 | 0 | 43   | 0.716667 | 0.516945 | 10.87165 | Stalled      | chr14:62895065-62913798   | 16.734   |
| Cirh1a        | 0 | 0 | 0 | 1179 | 19.65    | 21.9594  | 16.30613 | Unclassified | chr8:109415539-109446994  | 29.456   |
| Fosl2         | 0 | 0 | 0 | 170  | 2.833333 | 1.14393  | 4.918643 | Unclassified | chr5:32436844-32460207    | 21.364   |
| Olf71104      | 0 | 0 | 0 | 0    | 0        | 0.04121  | 0        | Unclassified | chr2:86861766-86864699    | 0.934    |
| Tmem71        | 0 | 0 | 0 | 77   | 1.283333 | 3.17384  | 5.295922 | Unclassified | chr15:66357773-66394608   | 34.836   |
| Gzmb          | 0 | 0 | 0 | 7    | 0.116667 | 1.48429  | 2.18347  | Unclassified | chr14:56877694-56883097   | 3.404    |
| Trnp1         | 0 | 0 | 0 | 29   | 0.483333 | 0.317481 | 2.195222 | Unclassified | chr4:133047014-133056465  | 7.452    |
| Prr8          | 0 | 0 | 0 | 1535 | 25.58333 | 9.6104   | 36.75338 | Unclassified | chr5:28641728-28745782    | 102.055  |
| Msa4a10       | 0 | 0 | 0 | 22   | 0.366667 | 0.038106 | 0.801847 | Unclassified | chr19:11036784-11051160   | 12.377   |
| Glod5         | 0 | 0 | 0 | 7    | 0.116667 | 0        | 1.453343 | Unclassified | chrX:7581326-7597618      | 14.293   |
| Krtap26-1     | 0 | 0 | 0 | 1    | 0.016667 | 0.06586  | 0        | Unclassified | chr16:88647068-88650041   | 0.974    |

|               |   |   |   |      |          |          |          |              |                           |         |
|---------------|---|---|---|------|----------|----------|----------|--------------|---------------------------|---------|
| Dcaf5         | 0 | 0 | 0 | 911  | 15.18333 | 9.58846  | 15.27916 | Unclassified | chr12:81436833-81539588   | 100.756 |
| Nsun2         | 0 | 0 | 0 | 1173 | 19.55    | 27.6551  | 4.221302 | Unclassified | chr13:69749121-69774535   | 23.415  |
| Eif4ebp2      | 0 | 0 | 0 | 706  | 11.76667 | 39.132   | 8.549631 | Unclassified | chr10:60895244-60917417   | 20.174  |
| Olfir645      | 0 | 0 | 0 | 1    | 0.016667 | 0.040558 | 1        | Unclassified | chr7:111232644-111235592  | 0.949   |
| Hook3         | 0 | 0 | 0 | 796  | 13.26667 | 1.80153  | 54.14343 | Stalled      | chr8:27131892-27231696    | 97.805  |
| Zim1          | 0 | 0 | 0 | 25   | 0.416667 | 0.014643 | 1.428235 | Unclassified | chr7:6628153-6651143      | 20.991  |
| Zik1          | 0 | 0 | 0 | 72   | 1.2      | 2.58676  | 4.914391 | Unclassified | chr7:11072572-11082730    | 8.159   |
| C330019L16Rik | 0 | 0 | 0 | 21   | 0.35     | 0.416319 | 4.08771  | Unclassified | chr7:49864895-49899958    | 33.064  |
| Zic3          | 0 | 0 | 0 | 3    | 0.05     | 0.076231 | 0        | Unclassified | chrX:55281804-55289807    | 6.004   |
| Olfir1364     | 0 | 0 | 0 | 3    | 0.05     | 0.040687 | 0        | Unclassified | chr13:21665380-21668323   | 0.944   |
| Pou3f3        | 0 | 0 | 0 | 7    | 0.116667 | 0.167199 | 0        | Unclassified | chr1:42751990-42757054    | 3.065   |
| Zhx1          | 0 | 0 | 0 | 411  | 6.85     | 4.98077  | 25.94961 | Unclassified | chr15:57878557-57910044   | 29.488  |
| Myocd         | 0 | 0 | 0 | 80   | 1.333333 | 0.083282 | 1.091022 | Unclassified | chr11:64990071-65085491   | 93.421  |
| Olfir373      | 0 | 0 | 0 | 7    | 0.116667 | 0.02706  | 2        | Unclassified | chr8:74621660-74624605    | 0.946   |
| Fank1         | 0 | 0 | 0 | 166  | 2.766667 | 0.168807 | 17.70097 | Stalled      | chr7:140966573-141073215  | 104.643 |
| Ttc12         | 0 | 0 | 0 | 57   | 0.95     | 0.112981 | 2.533223 | Unclassified | chr9:49245065-49296330    | 49.266  |
| Med30         | 0 | 0 | 0 | 267  | 4.45     | 12.6675  | 14.49448 | Unclassified | chr15:52541999-52561986   | 17.988  |
| Med6          | 0 | 0 | 0 | 217  | 3.616667 | 6.5344   | 9.45963  | Unclassified | chr12:82674550-82697945   | 21.396  |
| Lrrc69        | 0 | 0 | 0 | 93   | 1.55     | 0.021184 | 7.594714 | Unclassified | chr4:14592900-14725199    | 130.3   |
| Olfir355      | 0 | 0 | 0 | 2    | 0.033333 | 0.027473 | 1        | Unclassified | chr2:36782699-36785632    | 0.934   |
| Zfp345        | 0 | 0 | 0 | 3    | 0.05     | 0.066509 | 0        | Unclassified | chr2:150296726-150312799  | 14.074  |
| 1700013N18Rik | 0 | 0 | 0 | 18   | 0.3      | 0        | 1.837246 | Unclassified | chr5:108257271-108260783  | 1.513   |
| Gm5840        | 0 | 0 | 0 | 33   | 0.55     | 0.024459 | 1.401583 | Unclassified | chr2:153798680-153826231  | 25.552  |
| Pde6h         | 0 | 0 | 0 | 19   | 0.316667 | 0.091873 | 0.332276 | Unclassified | chr6:136901043-136912004  | 8.962   |
| Defb28        | 0 | 0 | 0 | 8    | 0.133333 | 0        | 0.708428 | Unclassified | chr2:152341990-152347183  | 3.194   |
| Pip5k1a       | 0 | 0 | 0 | 564  | 9.4      | 11.2149  | 16.00827 | Unclassified | chr3:94863519-94912780    | 47.262  |
| Olfir767      | 0 | 0 | 0 | 0    | 0        | 0        | 0        | Unclassified | chr10:128516087-128519017 | 0.931   |
| Olfir725      | 0 | 0 | 0 | 1    | 0.016667 | 0        | 0        | Unclassified | chr14:50654065-50657175   | 1.111   |
| Olfir1145     | 0 | 0 | 0 | 1    | 0.016667 | 0        | 1        | Unclassified | chr2:87647978-87650956    | 0.979   |
| Olfir727      | 0 | 0 | 0 | 2    | 0.033333 | 0.045992 | 1        | Unclassified | chr14:50744227-50747262   | 1.036   |
| Olfir601      | 0 | 0 | 0 | 0    | 0        | 0        | 0        | Unclassified | chr7:110506738-110509727  | 0.99    |
| Olfir726      | 0 | 0 | 0 | 0    | 0        | 0.039802 | 0        | Unclassified | chr14:50703388-50706354   | 0.967   |
| Akp3          | 0 | 0 | 0 | 11   | 0.183333 | 0.030515 | 0.723248 | Unclassified | chr1:89019582-89024487    | 2.906   |
| Atp11c        | 0 | 0 | 0 | 540  | 9        | 1.68443  | 69.06618 | Stalled      | chrX:57476466-57659156    | 180.691 |
| Pramef17      | 0 | 0 | 0 | 1    | 0.016667 | 0.032822 | 0        | Unclassified | chr4:143581021-143586272  | 3.252   |
| Klik1b3       | 0 | 0 | 0 | 8    | 0.133333 | 0.021305 | 1.315317 | Unclassified | chr7:51451599-51457721    | 4.123   |
| Olfir187      | 0 | 0 | 0 | 5    | 0.083333 | 0        | 0        | Unclassified | chr16:59035605-59041575   | 3.971   |
| Olfir186      | 0 | 0 | 0 | 0    | 0        | 0        | 0        | Unclassified | chr16:59026801-59029731   | 0.931   |
| Qk            | 0 | 0 | 0 | 1010 | 16.83333 | 7.88462  | 30.63612 | Unclassified | chr17:10399335-10514226   | 112.892 |
| Ii12b         | 0 | 0 | 0 | 19   | 0.316667 | 0.131382 | 0.432501 | Unclassified | chr11:44211564-44227519   | 13.956  |
| Ii13          | 0 | 0 | 0 | 10   | 0.166667 | 0.074452 | 0        | Unclassified | chr11:53444825-53450204   | 3.38    |
| Ii12rb2       | 0 | 0 | 0 | 471  | 7.85     | 0.191353 | 0.301097 | Unclassified | chr6:67242011-67328131    | 84.121  |
| Ii13ra2       | 0 | 0 | 0 | 7    | 0.116667 | 0        | 0.76337  | Unclassified | chrX:143818020-143840375  | 20.356  |
| Ii13ra1       | 0 | 0 | 0 | 54   | 0.9      | 0.166943 | 2.712931 | Unclassified | chrX:33650133-33711256    | 59.124  |
| Rbbp6         | 0 | 0 | 0 | 1292 | 21.53333 | 19.1694  | 6.109043 | Unclassified | chr7:130112077-130146086  | 32.01   |
| Ii15ra        | 0 | 0 | 0 | 262  | 4.366667 | 8.18582  | 11.71494 | Unclassified | chr2:11625474-11655589    | 28.116  |
| Ii15          | 0 | 0 | 0 | 106  | 1.766667 | 3.12138  | 19.52505 | Stalled      | chr8:84855522-84928444    | 70.923  |
| Mtmr2         | 0 | 0 | 0 | 868  | 14.46667 | 6.589    | 29.38068 | Unclassified | chr9:13551624-13610925    | 57.302  |
| Eif4e         | 0 | 0 | 0 | 942  | 15.7     | 11.64    | 2.334709 | Elongating   | chr3:138187154-138220563  | 31.41   |
| Morn3         | 0 | 0 | 0 | 149  | 2.483333 | 0.871012 | 0.237091 | Unclassified | chr5:123487135-123498829  | 9.695   |
| C1qtnf1       | 0 | 0 | 0 | 36   | 0.6      | 0.173469 | 0        | Unclassified | chr11:118293166-118311277 | 16.112  |
| Pf4           | 0 | 0 | 0 | 1    | 0.016667 | 1.04563  | 1        | Unclassified | chr5:91199460-91202409    | 0.95    |
| Sez6l         | 0 | 0 | 0 | 234  | 3.9      | 0.093102 | 1.631347 | Unclassified | chr5:112848177-113008205  | 158.029 |
| Tex101        | 0 | 0 | 0 | 6    | 0.1      | 0.036479 | 0.503311 | Unclassified | chr7:25453030-25459069    | 4.04    |
| Igdcc4        | 0 | 0 | 0 | 96   | 1.6      | 0.226817 | 0.861482 | Unclassified | chr9:64947301-64985750    | 36.45   |
| Cxcl11        | 0 | 0 | 0 | 2    | 0.033333 | 0.090609 | 0        | Unclassified | chr5:92788570-92794303    | 3.734   |
| Psrc1         | 0 | 0 | 0 | 100  | 1.666667 | 14.3907  | 4.532525 | Unclassified | chr3:108184760-108191082  | 4.323   |
| Pelo          | 0 | 0 | 0 | 292  | 4.866667 | 22.1964  | 16.09255 | Unclassified | chr13:115878562-115882366 | 1.805   |
| Hoxd10        | 0 | 0 | 0 | 10   | 0.166667 | 0.128951 | 2.090768 | Unclassified | chr2:74528004-74533159    | 3.156   |
| Olfir539      | 0 | 0 | 0 | 1    | 0.016667 | 0        | 0        | Unclassified | chr7:147851187-147854147  | 0.961   |
| 9430020K01Rik | 0 | 0 | 0 | 119  | 1.983333 | 0.434076 | 14.89107 | Stalled      | chr18:4632926-4682867     | 47.942  |
| Fcgbp         | 0 | 0 | 0 | 43   | 0.716667 | 0.022619 | 0        | Unclassified | chr7:28854254-28905883    | 49.63   |
| Ncap          | 0 | 0 | 0 | 796  | 13.26667 | 16.2139  | 10.94486 | Unclassified | chr2:126929564-126961639  | 30.076  |
| Dnahc11       | 0 | 0 | 0 | 367  | 6.116667 | 0.193623 | 2.823824 | Unclassified | chr12:119116454-119439516 | 321.063 |
| Dnahc8        | 0 | 0 | 0 | 386  | 6.433333 | 0.420212 | 0.391141 | Unclassified | chr17:30761880-31012209   | 248.33  |
| Ubr2          | 0 | 0 | 0 | 1341 | 22.35    | 11.0487  | 10.64792 | Unclassified | chr17:47065239-47149442   | 82.204  |
| Ipcef1        | 0 | 0 | 0 | 111  | 1.85     | 0.120085 | 0.501459 | Unclassified | chr10:3321355-3434998     | 111.644 |
| Fgfr11        | 0 | 0 | 0 | 94   | 1.566667 | 0.99569  | 10.56213 | Stalled      | chr5:109121247-109135968  | 12.722  |
| Trerf1        | 0 | 0 | 0 | 478  | 7.966667 | 0.180472 | 1.943519 | Unclassified | chr17:47275890-47496407   | 218.518 |
| Dnajc1        | 0 | 0 | 0 | 695  | 11.58333 | 6.88184  | 39.55223 | Stalled      | chr2:18138767-18316134    | 175.368 |
| Dnase1        | 0 | 0 | 0 | 91   | 1.516667 | 1.06881  | 1.56386  | Elongating   | chr16:4035144-4040024     | 2.881   |
| Mb12          | 0 | 0 | 0 | 3    | 0.05     | 0        | 0.741167 | Unclassified | chr19:30305446-30314172   | 6.727   |
| Gm6577        | 0 | 0 | 0 | 3    | 0.05     | 0.099632 | 1        | Unclassified | chr7:111681472-111685875  | 2.404   |
| Aldh3a1       | 0 | 0 | 0 | 27   | 0.45     | 0.081633 | 0.250202 | Unclassified | chr11:61020243-61031918   | 9.676   |
| Gjb6          | 0 | 0 | 0 | 7    | 0.116667 | 0.043319 | 0.755621 | Unclassified | chr14:57742139-57754414   | 10.276  |
| Akr1b3        | 0 | 0 | 0 | 364  | 6.066667 | 0.66777  | 5.597836 | Unclassified | chr6:34253929-34269489    | 13.561  |
| 1300017J02Rik | 0 | 0 | 0 | 52   | 0.866667 | 0.084503 | 0.857396 | Unclassified | chr9:103152859-103192627  | 37.769  |
| Hoxd11        | 0 | 0 | 0 | 10   | 0.166667 | 0.023554 | 0.259962 | Unclassified | chr2:74518449-74522195    | 1.747   |
| 0610037L13Rik | 0 | 0 | 0 | 590  | 9.833333 | 10.1242  | 13.38506 | Unclassified | chr4:107560503-107570407  | 7.905   |
| Hmgcl1        | 0 | 0 | 0 | 103  | 1.716667 | 0.482163 | 13.21647 | Stalled      | chr9:75860783-75984157    | 121.375 |
| Setd2         | 0 | 0 | 0 | 1264 | 21.06667 | 7.30125  | 17.49562 | Unclassified | chr9:110433100-110521137  | 86.038  |
| Emid2         | 0 | 0 | 0 | 223  | 3.716667 | 0.037904 | 0        | Unclassified | chr5:137217633-137360977  | 141.345 |
| Nacc1         | 0 | 0 | 0 | 646  | 10.76667 | 33.1703  | 3.466308 | Unclassified | chr8:87194378-87213761    | 17.384  |
| Fit1          | 0 | 0 | 0 | 194  | 3.233333 | 0.236621 | 2.326998 | Unclassified | chr5:148373771-148539564  | 163.794 |
| Sumo3         | 0 | 0 | 0 | 900  | 15       | 20.8069  | 12.14974 | Unclassified | chr10:77066978-77081076   | 12.099  |
| Snap91        | 0 | 0 | 0 | 77   | 1.283333 | 0.030809 | 0.608403 | Unclassified | chr9:86659238-86777207    | 115.97  |



|                      |   |          |   |      |           |          |          |              |                           |         |
|----------------------|---|----------|---|------|-----------|----------|----------|--------------|---------------------------|---------|
| <b>Sncg</b>          | 0 | 0        | 0 | 41   | 0.683333  | 0.485141 | 0        | Unclassified | chr6:60681566-60781849    | 98.284  |
| <b>Snap25</b>        | 0 | 0        | 0 | 35   | 0.583333  | 0.057452 | 1.446691 | Unclassified | chr2:136537185-136608164  | 68.98   |
| <b>Snapin</b>        | 0 | 0        | 0 | 236  | 3.933333  | 7.87752  | 6.25991  | Unclassified | chr3:90291948-90296935    | 2.988   |
| <b>Sncg</b>          | 0 | 0        | 0 | 10   | 0.166667  | 0        | 1.618197 | Unclassified | chr14:35183459-35189855   | 4.397   |
| <b>Snap23</b>        | 0 | 0        | 0 | 293  | 4.883333  | 9.13838  | 25.67109 | Stalled      | chr2:120391406-120426458  | 33.053  |
| <b>Fam3b</b>         | 0 | 0        | 0 | 33   | 0.55      | 0.105422 | 1.646662 | Unclassified | chr16:97692692-97728543   | 33.852  |
| <b>Sic6a20a</b>      | 0 | 0        | 0 | 47   | 0.783333  | 0.531122 | 3.072328 | Unclassified | chr9:123546024-123589950  | 41.927  |
| <b>Gigyf1</b>        | 0 | 0        | 0 | 367  | 6.116667  | 12.2025  | 0.419081 | Unclassified | chr5:137958107-137969163  | 9.057   |
| <b>Gpr151</b>        | 0 | 0        | 0 | 167  | 2.783333  | 0.062787 | 1.651345 | Elongating   | chr18:42737673-42741306   | 1.634   |
| <b>Sall4</b>         | 0 | 0        | 0 | 18   | 0.3       | 0.187886 | 0.512489 | Unclassified | chr2:168573831-168594701  | 18.871  |
| <b>Vgll2</b>         | 0 | 0        | 0 | 7    | 0.116667  | 0.104909 | 0        | Unclassified | chr10:51740491-51748277   | 5.787   |
| <b>Herpud2</b>       | 0 | 0        | 0 | 618  | 10.3      | 9.55799  | 74.69049 | Stalled      | chr9:24912574-24958280    | 43.707  |
| <b>Lamp2</b>         | 0 | 0        | 0 | 515  | 8.583333  | 18.4046  | 16.42235 | Unclassified | chrX:35758240-35811632    | 51.393  |
| <b>Krtap4-9</b>      | 0 | 0        | 0 | 0    | 0         | 0        | 0        | Unclassified | chr11:99644513-99647571   | 1.059   |
| <b>Cltb</b>          | 0 | 0        | 0 | 250  | 4.166667  | 11.0408  | 5.22616  | Unclassified | chr13:54694299-54714633   | 18.335  |
| <b>Bglap-rs1</b>     | 0 | 0        | 0 | 2    | 0.033333  | 0.191114 | 2        | Unclassified | chr3:88172538-88175642    | 1.105   |
| <b>Kctd21</b>        | 0 | 0        | 0 | 130  | 2.166667  | 0.939538 | 13.84206 | Stalled      | chr7:104478832-104498726  | 17.895  |
| <b>Bglap2</b>        | 0 | 0        | 0 | 0    | 0         | 0.097851 | 0        | Unclassified | chr3:88181657-88184621    | 0.965   |
| <b>Cndp1</b>         | 0 | 0        | 0 | 36   | 0.6       | 0.040773 | 0.524379 | Unclassified | chr18:84779900-84821487   | 39.588  |
| <b>Scppdh</b>        | 0 | 0        | 0 | 80   | 1.333333  | 3.32652  | 17.23797 | Stalled      | chr1:181596361-181617315  | 18.955  |
| <b>BC049635</b>      | 0 | 0        | 0 | 13   | 0.216667  | 0.0617   | 0.366286 | Unclassified | chr4:42880874-42889075    | 6.202   |
| <b>Pou3f1</b>        | 0 | 0        | 0 | 15   | 0.25      | 0.614941 | 0.893032 | Unclassified | chr4:124332888-124337899  | 3.012   |
| <b>Acot5</b>         | 0 | 0        | 0 | 8    | 0.133333  | 0.767466 | 1.762376 | Unclassified | chr12:85408274-85416969   | 6.696   |
| <b>Ccdc66</b>        | 0 | 0        | 0 | 280  | 4.666667  | 2.99753  | 15.68743 | Unclassified | chr14:28295595-28323646   | 26.052  |
| <b>Tmem184a</b>      | 0 | 0        | 0 | 70   | 1.166667  | 0.082759 | 0.302606 | Unclassified | chr5:140280906-140291197  | 8.292   |
| <b>Abcc9</b>         | 0 | 0        | 0 | 78   | 1.3       | 0.024372 | 0        | Unclassified | chr6:142536381-142652794  | 114.414 |
| <b>Iqub</b>          | 0 | 0        | 0 | 38   | 0.633333  | 0.031593 | 2.708465 | Unclassified | chr6:24394864-24467067    | 70.204  |
| <b>Supt5h</b>        | 0 | 0        | 0 | 1283 | 21.383333 | 51.0141  | 9.318646 | Unclassified | chr7:29099914-29125738    | 23.825  |
| <b>Abcc8</b>         | 0 | 0        | 0 | 135  | 2.25      | 0.046586 | 0.359073 | Unclassified | chr7:53359892-53437403    | 75.512  |
| <b>Tmem205</b>       | 0 | 0        | 0 | 62   | 1.033333  | 3.18367  | 9.30292  | Unclassified | chr9:21725452-21733906    | 6.455   |
| <b>Zfyve16</b>       | 0 | 0        | 0 | 439  | 7.316667  | 1.37283  | 86.82185 | Stalled      | chr13:93257703-93302765   | 43.063  |
| <b>Ankrd34b</b>      | 0 | 0        | 0 | 24   | 0.4       | 0.269989 | 1.270445 | Unclassified | chr13:93193923-93211613   | 15.691  |
| <b>Cnksr1</b>        | 0 | 0        | 0 | 34   | 0.566667  | 0.051951 | 3.391054 | Unclassified | chr4:133783956-133796314  | 10.359  |
| <b>Rimkla</b>        | 0 | 0        | 0 | 57   | 0.95      | 0.485395 | 3.230297 | Unclassified | chr4:119137890-119167203  | 27.314  |
| <b>Cttnbp2</b>       | 0 | 0        | 0 | 100  | 1.666667  | 0.082054 | 3.040025 | Unclassified | chr6:18316476-18466825    | 148.35  |
| <b>Enpp5</b>         | 0 | 0        | 0 | 8    | 0.133333  | 0.318764 | 0.48961  | Unclassified | chr17:44213794-44223508   | 7.715   |
| <b>Jam3</b>          | 0 | 0        | 0 | 192  | 3.2       | 0.332201 | 1.413185 | Unclassified | chr9:26904968-26964965    | 57.998  |
| <b>Sic7a4</b>        | 0 | 0        | 0 | 15   | 0.25      | 0.0833   | 2.058189 | Unclassified | chr16:17572110-17578764   | 4.655   |
| <b>Nrg4</b>          | 0 | 0        | 0 | 198  | 3.3       | 0.9901   | 0.241501 | Unclassified | chr9:55068028-55133432    | 63.405  |
| <b>BC026439</b>      | 0 | 0        | 0 | 113  | 1.883333  | 0.032474 | 1.358331 | Unclassified | chr15:57075325-57311180   | 233.856 |
| <b>Tbc1d9</b>        | 0 | 0        | 0 | 559  | 9.316667  | 3.03689  | 14.13436 | Stalled      | chr8:85687250-85796839    | 107.59  |
| <b>Fsip1</b>         | 0 | 0        | 0 | 77   | 1.283333  | 1.17241  | 12.75832 | Stalled      | chr2:118030623-118084690  | 52.068  |
| <b>Gm8787</b>        | 0 | 0        | 0 | 2    | 0.033333  | 0        | 0.963712 | Unclassified | chrX:76575851-76605407    | 27.557  |
| <b>Nlrp1a</b>        | 0 | 0        | 0 | 60   | 1         | 0.10391  | 9.546172 | Unclassified | chr11:70904698-70960206   | 53.509  |
| <b>Acvr1c</b>        | 0 | 0        | 0 | 78   | 1.3       | 0.061064 | 2.214585 | Unclassified | chr2:58119863-58212169    | 90.307  |
| <b>Camk4</b>         | 0 | 0        | 0 | 195  | 3.25      | 0.144656 | 2.300085 | Unclassified | chr18:33096694-33355421   | 256.728 |
| <b>Camk2g</b>        | 0 | 0        | 0 | 699  | 11.65     | 3.951    | 17.47843 | Unclassified | chr14:21554096-21615310   | 59.215  |
| <b>OTTMUSG00000</b>  | 0 | 0        | 0 | 0    | 0         | 0        | 0        | Unclassified | chrX:75485800-75493260    | 5.461   |
| <b>Atoh1</b>         | 0 | 0        | 0 | 7    | 0.116667  | 0.190099 | 1.058881 | Unclassified | chr6:64677139-64681229    | 2.091   |
| <b>Neurod6</b>       | 0 | 0        | 0 | 5    | 0.083333  | 0.011906 | 1.650472 | Unclassified | chr6:55627812-55633257    | 3.446   |
| <b>Neurog2</b>       | 0 | 0        | 0 | 24   | 0.4       | 1.00588  | 1.135011 | Unclassified | chr3:127334062-127338549  | 2.488   |
| <b>Neurog3</b>       | 0 | 0        | 0 | 3    | 0.05      | 0.18309  | 1        | Unclassified | chr10:61593837-61597511   | 1.675   |
| <b>Atox1</b>         | 0 | 0        | 0 | 288  | 4.8       | 42.4529  | 25.77394 | Stalled      | chr11:55260144-55276640   | 14.497  |
| <b>4921528I01Rik</b> | 0 | 0        | 0 | 171  | 2.85      | 0        | 0        | Unclassified | chr18:21969397-22331897   | 360.501 |
| <b>Spata1</b>        | 0 | 0        | 0 | 337  | 5.616667  | 0.302324 | 90.08289 | Stalled      | chr3:146120166-146164717  | 42.552  |
| <b>Poteg</b>         | 0 | 0        | 0 | 18   | 0.3       | 0.017801 | 1.512227 | Unclassified | chr8:28556141-28605644    | 47.504  |
| <b>Calm13</b>        | 0 | 0        | 0 | 2    | 0.033333  | 0.179709 | 2        | Unclassified | chr13:3802138-3805564     | 1.427   |
| <b>Tex19.2</b>       | 0 | 0        | 0 | 5    | 0.083333  | 0.062702 | 0.655312 | Unclassified | chr11:120977530-120981991 | 2.462   |
| <b>Ces6</b>          | 0 | 0        | 0 | 5    | 0.083333  | 0.011163 | 0.623565 | Unclassified | chr8:107255907-107265532  | 7.626   |
| <b>Defb39</b>        | 0 | 0        | 0 | 6    | 0.1       | 0        | 2.537964 | Unclassified | chr8:19052825-19066810    | 11.986  |
| <b>Zranb1</b>        | 0 | 0        | 0 | 143  | 2.383333  | 2.82227  | 0.99596  | Unclassified | chr7:140139304-140175634  | 34.331  |
| <b>Defb40</b>        | 0 | 0        | 0 | 4    | 0.066667  | 0        | 0        | Unclassified | chr8:18974939-18980116    | 3.178   |
| <b>Yipf1</b>         | 0 | 0        | 0 | 530  | 8.833333  | 12.2214  | 16.68609 | Unclassified | chr4:106985035-107032427  | 45.393  |
| <b>Glib13</b>        | 0 | 0        | 0 | 19   | 0.316667  | 0.020797 | 0.73625  | Unclassified | chr9:26625537-26670408    | 42.872  |
| <b>Zfp791</b>        | 0 | 0        | 0 | 40   | 0.666667  | 0.488978 | 3.888072 | Unclassified | chr8:87633065-87648994    | 13.93   |
| <b>Defb48</b>        | 0 | 0        | 0 | 4    | 0.066667  | 0.058124 | 0.666073 | Unclassified | chr14:63596364-63605347   | 6.984   |
| <b>V1rc6</b>         | 0 | 0        | 0 | 0    | 0         | 0.005858 | 0        | Unclassified | chr6:57206142-57209042    | 0.901   |
| <b>V1rc5</b>         | 0 | 0        | 0 | 1    | 0.016667  | 0.056772 | 0        | Unclassified | chr6:57157851-57160754    | 0.904   |
| <b>V1rc3</b>         | 0 | 0        | 0 | 3    | 0.05      | 0.017169 | 2        | Unclassified | chr6:57085346-57088246    | 0.901   |
| <b>Tars2</b>         | 0 | 0        | 0 | 490  | 8.166667  | 13.0106  | 13.8871  | Unclassified | chr3:95543898-95560900    | 15.003  |
| <b>Ptpn21</b>        | 0 | 0        | 0 | 271  | 4.516667  | 2.06011  | 21.4734  | Stalled      | chr12:99914950-99974855   | 57.906  |
| <b>Krt73</b>         | 0 | 0        | 0 | 11   | 0.183333  | 0.0476   | 0        | Unclassified | chr15:101623738-101634763 | 9.026   |
| <b>Krt79</b>         | 0 | 0        | 0 | 19   | 0.316667  | 0.091676 | 0.357005 | Unclassified | chr15:101759762-101772755 | 10.994  |
| <b>Rai2</b>          | 0 | 0        | 0 | 25   | 0.416667  | 0.237187 | 0.719167 | Unclassified | chrX:158152967-158217426  | 62.46   |
| <b>Spryd3</b>        | 0 | 0        | 0 | 332  | 5.533333  | 9.96042  | 13.75781 | Unclassified | chr15:101946958-101968646 | 19.689  |
| <b>Nrip3</b>         | 0 | 0        | 0 | 43   | 0.716667  | 0.39595  | 3.784169 | Unclassified | chr7:116901569-116927059  | 23.491  |
| <b>Plagl2</b>        | 0 | 130.7236 | 0 | 1053 | 17.55     | 14.4096  | 6.602261 | Unclassified | chr2:153053504-153069094  | 13.591  |
| <b>L3mbtl</b>        | 0 | 0        | 0 | 130  | 2.166667  | 0.112547 | 14.26193 | Stalled      | chr2:162767200-162800258  | 31.059  |
| <b>Ly6g6c</b>        | 0 | 0        | 0 | 12   | 0.2       | 0        | 0.532134 | Unclassified | chr17:35202269-35206993   | 2.725   |
| <b>Gpr133</b>        | 0 | 0        | 0 | 162  | 2.7       | 0.091847 | 0.39892  | Unclassified | chr5:129600624-129710474  | 107.851 |
| <b>Yipf5</b>         | 0 | 0        | 0 | 267  | 4.45      | 7.18155  | 19.22588 | Unclassified | chr18:40364518-40381053   | 14.536  |
| <b>Sbno1</b>         | 0 | 0        | 0 | 909  | 15.15     | 6.35546  | 15.33362 | Unclassified | chr5:124818710-124877923  | 57.214  |
| <b>Gpr81</b>         | 0 | 0        | 0 | 7    | 0.116667  | 0.148256 | 2.782715 | Unclassified | chr5:124326744-124332029  | 3.286   |
| <b>Gal3st3</b>       | 0 | 0        | 0 | 26   | 0.433333  | 0.210188 | 0        | Unclassified | chr19:5296330-5308738     | 10.409  |
| <b>Ftmt</b>          | 0 | 0        | 0 | 1    | 0.016667  | 0.035089 | 0        | Unclassified | chr18:52489189-52492650   | 1.462   |
| <b>Samd8</b>         | 0 | 0        | 0 | 411  | 6.85      | 1.16816  | 21.51096 | Stalled      | chr14:22567752-22617947   | 48.196  |

|               |   |   |   |     |          |          |          |              |                           |         |
|---------------|---|---|---|-----|----------|----------|----------|--------------|---------------------------|---------|
| Tm4sf19       | 0 | 0 | 0 | 30  | 0.5      | 0.10196  | 0.847713 | Unclassified | chr16:32398591-32408313   | 7.723   |
| Klhdc1        | 0 | 0 | 0 | 621 | 10.35    | 3.03055  | 35.74688 | Unclassified | chr12:70340818-70384948   | 42.131  |
| Syce1l        | 0 | 0 | 0 | 92  | 1.533333 | 0        | 2.576036 | Unclassified | chr8:116165112-116179433  | 12.322  |
| EG436523      | 0 | 0 | 0 | 2   | 0.033333 | 0.02835  | 0        | Unclassified | chr6:41340354-41347255    | 4.902   |
| Lce1a1        | 0 | 0 | 0 | 1   | 0.016667 | 0.036118 | 1        | Unclassified | chr3:92450453-92454229    | 1.777   |
| 1700010M22Rik | 0 | 0 | 0 | 1   | 0.016667 | 0        | 1        | Unclassified | chr2:144647401-144650151  | 0.751   |
| Lrrc7         | 0 | 0 | 0 | 243 | 4.05     | 0.051976 | 1.328489 | Unclassified | chr3:157747402-158227185  | 477.784 |
| Stau2         | 0 | 0 | 0 | 996 | 16.6     | 4.17506  | 28.52553 | Stalled      | chr1:16218890-16511383    | 290.494 |
| Dlec1         | 0 | 0 | 0 | 130 | 2.166667 | 1.79473  | 11.77228 | Stalled      | chr9:119009595-119056811  | 45.217  |
| Ciz1          | 0 | 0 | 0 | 434 | 7.233333 | 14.1776  | 9.915779 | Unclassified | chr2:32216753-32233817    | 15.065  |
| 1700011A15Rik | 0 | 0 | 0 | 16  | 0.266667 | 0.044245 | 1.021891 | Unclassified | chr15:101276175-101284340 | 6.166   |
| Foxa2         | 0 | 0 | 0 | 10  | 0.166667 | 0.066281 | 0        | Unclassified | chr2:147868613-147874705  | 4.093   |
| Dnajc5b       | 0 | 0 | 0 | 85  | 1.416667 | 0.041122 | 1.111199 | Unclassified | chr3:19406594-19510861    | 102.268 |
| Tmem196       | 0 | 0 | 0 | 33  | 0.55     | 0        | 2.179714 | Unclassified | chr12:121182434-121257179 | 72.746  |
| Rnaseh2c      | 0 | 0 | 0 | 252 | 4.2      | 84.7621  | 2.172686 | Unclassified | chr19:5599872-5602959     | 1.088   |
| Tmem169       | 0 | 0 | 0 | 91  | 1.516667 | 0.077399 | 41.43574 | Stalled      | chr1:72328946-72349569    | 18.624  |
| Ccdc34        | 0 | 0 | 0 | 207 | 3.45     | 9.99499  | 37.70334 | Stalled      | chr2:109855973-109885400  | 27.508  |
| Vstm2a        | 0 | 0 | 0 | 18  | 0.3      | 0.039852 | 1.265228 | Unclassified | chr11:16155726-16184554   | 26.829  |
| Diras2        | 0 | 0 | 0 | 41  | 0.683333 | 0.472893 | 3.988079 | Unclassified | chr13:52599743-52628205   | 26.463  |
| Urm1          | 0 | 0 | 0 | 567 | 9.45     | 12.3244  | 10.17729 | Unclassified | chr2:29680908-29700516    | 17.609  |
| Tuft1         | 0 | 0 | 0 | 104 | 1.733333 | 2.11331  | 5.078843 | Unclassified | chr3:94416680-94464728    | 46.049  |
| Tmx3          | 0 | 0 | 0 | 305 | 5.083333 | 0        | 34.74875 | Stalled      | chr18:90677545-90712659   | 33.115  |
| AI593442      | 0 | 0 | 0 | 9   | 0.15     | 0.057043 | 1.147939 | Unclassified | chr9:52481146-52489534    | 6.389   |
| Pkp2          | 0 | 0 | 0 | 95  | 1.583333 | 0.709309 | 25.48163 | Stalled      | chr16:16211437-16272805   | 59.369  |
| Nppla8        | 0 | 0 | 0 | 576 | 9.6      | 3.86488  | 41.16475 | Unclassified | chr12:45368140-45414422   | 44.283  |
| Klh13         | 0 | 0 | 0 | 36  | 0.6      | 0.007956 | 0.809826 | Unclassified | chrX:22796396-22944179    | 145.784 |
| Ikbip         | 0 | 0 | 0 | 269 | 4.483333 | 3.81601  | 103.732  | Stalled      | chr10:90543783-90565358   | 19.576  |
| Ssxb1         | 0 | 0 | 0 | 1   | 0.016667 | 0        | 0        | Unclassified | chrX:7988430-7999823      | 8.854   |
| Ergic2        | 0 | 0 | 0 | 793 | 13.21667 | 13.27    | 22.51049 | Unclassified | chr6:148127839-148162896  | 33.058  |
| Nfkbib        | 0 | 0 | 0 | 298 | 4.966667 | 26.4713  | 8.320342 | Unclassified | chr7:29543269-29553543    | 8.275   |
| Olfr1441      | 0 | 0 | 0 | 4   | 0.066667 | 0.080353 | 3        | Unclassified | chr19:12494800-12497757   | 0.958   |
| Olfr1440      | 0 | 0 | 0 | 1   | 0.016667 | 0        | 0        | Unclassified | chr19:12466754-12469702   | 0.949   |
| BC048355      | 0 | 0 | 0 | 131 | 2.183333 | 6.59903  | 6.513205 | Unclassified | chr17:46631737-46636567   | 2.831   |
| Olfr76        | 0 | 0 | 0 | 0   | 0        | 0        | 0        | Unclassified | chr19:12194210-12197164   | 0.955   |
| Olfr1427      | 0 | 0 | 0 | 1   | 0.016667 | 0        | 1        | Unclassified | chr19:12173191-12176127   | 0.937   |
| Olfr1423      | 0 | 0 | 0 | 1   | 0.016667 | 0        | 1        | Unclassified | chr19:12110297-12113230   | 0.934   |
| Olfr825       | 0 | 0 | 0 | 0   | 0        | 0.022653 | 0        | Unclassified | chr10:129599417-129602380 | 0.964   |
| Tmem232       | 0 | 0 | 0 | 159 | 2.65     | 0.049522 | 2.586988 | Unclassified | chr17:65605344-65891222   | 284.779 |
| Olfr826       | 0 | 0 | 0 | 2   | 0.033333 | 0.023158 | 2        | Unclassified | chr10:129616992-129619934 | 0.943   |
| Igfbp7        | 0 | 0 | 0 | 137 | 2.283333 | 0.37794  | 1.2312   | Unclassified | chr5:77778264-77839070    | 58.807  |
| Dock6         | 0 | 0 | 0 | 368 | 6.133333 | 1.29889  | 9.635678 | Unclassified | chr9:21604623-21659079    | 52.457  |
| Zmat3         | 0 | 0 | 0 | 254 | 4.233333 | 2.16491  | 8.318696 | Unclassified | chr3:32233715-32266587    | 30.873  |
| Rer1          | 0 | 0 | 0 | 567 | 9.45     | 28.9294  | 8.866904 | Unclassified | chr4:154448220-154462406  | 12.187  |
| Prdm13        | 0 | 0 | 0 | 20  | 0.333333 | 0.233005 | 0.998666 | Unclassified | chr4:21604626-21615110    | 8.485   |
| Mill1         | 0 | 0 | 0 | 11  | 0.183333 | 0.011357 | 0        | Unclassified | chr7:18828695-18851441    | 20.747  |
| Gpd1          | 0 | 0 | 0 | 94  | 1.566667 | 0.427978 | 1.731197 | Elongating   | chr15:99546023-99555438   | 7.416   |
| Ifnb1         | 0 | 0 | 0 | 7   | 0.116667 | 0.033289 | 5        | Unclassified | chr4:88167928-88170698    | 0.771   |
| Ifnar1        | 0 | 0 | 0 | 688 | 11.46667 | 6.38166  | 18.17107 | Unclassified | chr16:91483459-91510767   | 25.309  |
| Ifnab         | 0 | 0 | 0 | 1   | 0.016667 | 0.042192 | 0        | Unclassified | chr4:88336502-88339172    | 0.671   |
| Ampd1         | 0 | 0 | 0 | 63  | 1.05     | 0.054724 | 1.859889 | Unclassified | chr3:102875936-102903643  | 25.708  |
| Ifna9         | 0 | 0 | 0 | 4   | 0.066667 | 0.009201 | 4        | Unclassified | chr4:88237716-88240289    | 0.574   |
| Ifna7         | 0 | 0 | 0 | 0   | 0        | 0.022198 | 0        | Unclassified | chr4:88460128-88462704    | 0.577   |
| Mib1          | 0 | 0 | 0 | 552 | 9.2      | 6.6828   | 27.32544 | Stalled      | chr18:10723622-10812215   | 86.594  |
| Crtac1        | 0 | 0 | 0 | 173 | 2.883333 | 0.107783 | 0.473934 | Unclassified | chr19:42357526-42508273   | 148.748 |
| Gjc3          | 0 | 0 | 0 | 5   | 0.083333 | 0.043754 | 1.781469 | Unclassified | chr5:138395036-138406187  | 9.152   |
| Ifng          | 0 | 0 | 0 | 2   | 0.033333 | 0.106183 | 0        | Unclassified | chr10:117876102-117882948 | 4.847   |
| Thop1         | 0 | 0 | 0 | 355 | 5.916667 | 14.6976  | 7.439732 | Unclassified | chr10:80530827-80545105   | 12.279  |
| Lypd4         | 0 | 0 | 0 | 6   | 0.1      | 0.10534  | 1.151704 | Unclassified | chr7:25649638-25656710    | 5.073   |
| BC049730      | 0 | 0 | 0 | 4   | 0.066667 | 0.032806 | 0.681427 | Unclassified | chr7:25492277-25499554    | 5.278   |
| Atp1a3        | 0 | 0 | 0 | 40  | 0.666667 | 0.165284 | 1.278281 | Unclassified | chr7:25763187-25792914    | 27.728  |
| E2f6          | 0 | 0 | 0 | 349 | 5.816667 | 6.23559  | 8.849895 | Unclassified | chr12:16815770-16833549   | 15.78   |
| Sp5           | 0 | 0 | 0 | 18  | 0.3      | 0.859848 | 0.819989 | Unclassified | chr2:70310979-70315783    | 2.805   |
| Zfp574        | 0 | 0 | 0 | 588 | 9.8      | 7.05068  | 8.149068 | Unclassified | chr7:25860264-25868511    | 6.248   |
| Bahd1         | 0 | 0 | 0 | 561 | 9.35     | 10.4209  | 7.357781 | Unclassified | chr2:118725350-118750260  | 22.911  |
| Gm11390       | 0 | 0 | 0 | 12  | 0.2      | 0        | 1.515015 | Unclassified | chr13:33751273-33763454   | 10.182  |
| Gm13154       | 0 | 0 | 0 | 24  | 0.4      | 0.133873 | 2.427982 | Unclassified | chr4:146925415-146959304  | 31.89   |
| Pcdhga2       | 0 | 0 | 0 | 681 | 11.35    | 0        | 4.052222 | Unclassified | chr18:37826758-38001524   | 172.767 |
| Gm5631        | 0 | 0 | 0 | 27  | 0.45     | 0.071755 | 0.725666 | Unclassified | chr19:8136698-8208472     | 69.775  |
| Wdr93         | 0 | 0 | 0 | 83  | 1.383333 | 0.022436 | 7.724474 | Unclassified | chr7:86886048-86930836    | 42.789  |
| 2610001J05Rik | 0 | 0 | 0 | 179 | 2.983333 | 8.99737  | 16.72873 | Stalled      | chr6:13819073-13823483    | 2.411   |
| Sic16a9       | 0 | 0 | 0 | 33  | 0.55     | 0.093524 | 2.34508  | Unclassified | chr10:69706023-69748699   | 40.677  |
| Olfr877       | 0 | 0 | 0 | 3   | 0.05     | 0        | 3        | Unclassified | chr9:37660404-37663340    | 0.937   |
| Plbd1         | 0 | 0 | 0 | 762 | 12.7     | 22.1245  | 5.129836 | Unclassified | chr6:136560591-136612414  | 49.824  |
| Olfr470       | 0 | 0 | 0 | 2   | 0.033333 | 0        | 1        | Unclassified | chr7:114988300-114991245  | 0.946   |
| Olfr883       | 0 | 0 | 0 | 1   | 0.016667 | 0        | 1        | Unclassified | chr9:37831392-37834322    | 0.931   |
| Pros1         | 0 | 0 | 0 | 171 | 2.85     | 1.48151  | 22.00143 | Stalled      | chr16:62852159-62929166   | 75.008  |
| Acvr2b        | 0 | 0 | 0 | 57  | 0.95     | 0.173295 | 2.337995 | Unclassified | chr9:119309618-119342624  | 31.007  |
| Prm3          | 0 | 0 | 0 | 6   | 0.1      | 0        | 4        | Unclassified | chr16:10790600-10793007   | 0.408   |
| Prnp          | 0 | 0 | 0 | 134 | 2.233333 | 1.20776  | 25.03299 | Stalled      | chr2:131733663-131764167  | 28.505  |
| Proc          | 0 | 0 | 0 | 26  | 0.433333 | 0.049011 | 1.237462 | Unclassified | chr18:32282779-32301224   | 16.446  |
| Olfr1338      | 0 | 0 | 0 | 0   | 0        | 0.013605 | 0        | Unclassified | chr4:118426199-118429141  | 0.943   |
| Prom1         | 0 | 0 | 0 | 133 | 2.216667 | 0.336867 | 0.90349  | Unclassified | chr5:44384860-44494975    | 108.116 |
| Prop1         | 0 | 0 | 0 | 8   | 0.133333 | 0.064082 | 0.378625 | Unclassified | chr11:50764307-50769134   | 2.828   |
| Paps2         | 0 | 0 | 0 | 163 | 2.716667 | 0.504093 | 0.900343 | Unclassified | chr19:32692494-32741677   | 47.184  |
| Fam160a1      | 0 | 0 | 0 | 127 | 2.116667 | 1.88057  | 0        | Unclassified | chr3:85463984-85552131    | 86.148  |
| Ssx9          | 0 | 0 | 0 | 2   | 0.033333 | 0.004364 | 0        | Unclassified | chrX:8323555-8331713      | 6.159   |

|               |   |          |   |      |          |          |          |              |                           |         |
|---------------|---|----------|---|------|----------|----------|----------|--------------|---------------------------|---------|
| Slc10a3       | 0 | 0        | 0 | 137  | 2.283333 | 3.16401  | 13.77973 | Stalled      | chrX:71614557-71620595    | 4.039   |
| C730027P07Rik | 0 | 0        | 0 | 81   | 1.35     | 1.84916  | 1.286861 | Unclassified | chr9:121859851-121887803  | 25.953  |
| 4932411E22Rik | 0 | 0        | 0 | 20   | 0.333333 | 0.081755 | 0        | Unclassified | chr11:89251536-89282262   | 28.727  |
| Calr4         | 0 | 0        | 0 | 41   | 0.683333 | 0.19988  | 0.341315 | Unclassified | chr4:108906236-108926853  | 18.618  |
| Mrgpre        | 0 | 0        | 0 | 76   | 1.266667 | 1.39449  | 5.117525 | Unclassified | chr7:150964269-150972405  | 6.137   |
| Pigh          | 0 | 0        | 0 | 225  | 3.75     | 3.74054  | 20.50224 | Stalled      | chr12:80181657-80192657   | 9.001   |
| Gm5334        | 0 | 0        | 0 | 6    | 0.1      | 0.024742 | 4        | Unclassified | chr7:75761341-75764895    | 1.555   |
| Plekha6       | 0 | 0        | 0 | 135  | 2.25     | 0.421349 | 1.209402 | Unclassified | chr1:135140673-135200012  | 57.34   |
| Tnfrsf26      | 0 | 0        | 0 | 188  | 3.133333 | 1.43083  | 3.37831  | Unclassified | chr7:150793589-150815750  | 20.162  |
| Suclg2        | 0 | 113.7595 | 0 | 1617 | 26.95    | 6.9892   | 19.6734  | Unclassified | chr6:95424127-95670831    | 244.705 |
| Kihl12        | 0 | 0        | 0 | 402  | 6.7      | 4.13365  | 27.30582 | Unclassified | chr1:136350131-136387450  | 35.32   |
| 5830411N06Rik | 0 | 0        | 0 | 39   | 0.65     | 0.062505 | 0.578168 | Unclassified | chr7:147431199-147483540  | 50.342  |
| Fbxw15        | 0 | 0        | 0 | 10   | 0.166667 | 0        | 0.619643 | Unclassified | chr9:109455115-109472776  | 15.662  |
| Lysmd1        | 0 | 0        | 0 | 189  | 3.15     | 7.40171  | 3.951853 | Unclassified | chr3:94936031-94943441    | 5.411   |
| Hprt          | 0 | 0        | 0 | 479  | 7.983333 | 35.6714  | 29.03702 | Unclassified | chrX:50339254-50374837    | 33.584  |
| Cldn22        | 0 | 0        | 0 | 1    | 0.016667 | 0.064468 | 1        | Unclassified | chr8:48907835-48910829    | 0.995   |
| St3gal4       | 0 | 0        | 0 | 327  | 5.45     | 1.52668  | 33.77444 | Stalled      | chr9:34854163-34926395    | 70.233  |
| Fbxw26        | 0 | 0        | 0 | 13   | 0.216667 | 0.011977 | 0.696395 | Unclassified | chr9:109620079-109650603  | 28.525  |
| Hes1          | 0 | 0        | 0 | 95   | 1.583333 | 3.74411  | 0.422161 | Unclassified | chr16:30063442-30067882   | 2.441   |
| Uhrf2         | 0 | 0        | 0 | 993  | 16.55    | 9.79749  | 27.58334 | Unclassified | chr19:30103002-30168214   | 63.213  |
| Hells         | 0 | 0        | 0 | 1071 | 17.85    | 14.3039  | 23.88142 | Unclassified | chr19:39003479-39042767   | 37.289  |
| Supt3h        | 0 | 0        | 0 | 845  | 14.08333 | 3.9305   | 72.62955 | Stalled      | chr17:44912119-45256233   | 342.115 |
| Heph          | 0 | 0        | 0 | 22   | 0.366667 | 0.013041 | 0        | Unclassified | chrX:93648774-93769821    | 119.048 |
| Stxbp3a       | 0 | 0        | 0 | 404  | 6.733333 | 2.88883  | 26.7452  | Stalled      | chr3:108596097-108645420  | 47.324  |
| Hesx1         | 0 | 0        | 0 | 2    | 0.033333 | 0.169379 | 2        | Unclassified | chr14:27811547-27811509   | 1.963   |
| Jmjd4         | 0 | 0        | 0 | 261  | 4.35     | 4.64855  | 11.91727 | Unclassified | chr11:59261589-59271570   | 7.982   |
| Ndr3          | 0 | 0        | 0 | 262  | 4.366667 | 5.25164  | 17.1952  | Stalled      | chr2:156753077-156819847  | 64.771  |
| Zrsr2         | 0 | 0        | 0 | 648  | 10.8     | 8.82854  | 20.18517 | Unclassified | chrX:160373374-160398530  | 23.157  |
| U2af2         | 0 | 0        | 0 | 1535 | 25.58333 | 92.3643  | 9.747729 | Unclassified | chr7:5011783-5031541      | 17.759  |
| Glce          | 0 | 0        | 0 | 50   | 0.833333 | 2.02252  | 0.438581 | Unclassified | chr9:61905055-61920413    | 13.359  |
| Tinag         | 0 | 0        | 0 | 36   | 0.6      | 0        | 0.726742 | Unclassified | chr9:76799505-76895588    | 94.084  |
| Tmprss11e     | 0 | 0        | 0 | 21   | 0.35     | 0        | 0        | Unclassified | chr5:87134210-87176832    | 40.623  |
| Hyal6         | 0 | 0        | 0 | 6    | 0.1      | 0        | 0        | Unclassified | chr6:24681244-24695452    | 12.209  |
| Fam55b        | 0 | 0        | 0 | 26   | 0.433333 | 0.443117 | 0.487705 | Unclassified | chr9:48126086-48150981    | 22.896  |
| Kifap3        | 0 | 0        | 0 | 169  | 2.816667 | 0.839678 | 24.19006 | Stalled      | chr1:165707809-165847231  | 137.423 |
| Kif7          | 0 | 0        | 0 | 206  | 3.433333 | 0.439517 | 0.069506 | Unclassified | chr7:86842984-86861072    | 16.089  |
| Slc19a3       | 0 | 0        | 0 | 22   | 0.366667 | 0.081907 | 0.567454 | Unclassified | chr1:83009098-83037023    | 25.926  |
| Zfp819        | 0 | 0        | 0 | 17   | 0.283333 | 0.087567 | 1.258129 | Unclassified | chr7:50860538-50873649    | 11.112  |
| 4933406J08Rik | 0 | 0        | 0 | 21   | 0.35     | 0.030356 | 0        | Unclassified | chr2:122010007-122032129  | 20.123  |
| Kif3c         | 0 | 0        | 0 | 207  | 3.45     | 2.65436  | 8.461041 | Unclassified | chr12:3363131-3406494     | 41.364  |
| Kif4          | 0 | 0        | 0 | 699  | 11.65    | 11.4192  | 34.48827 | Unclassified | chrX:97819403-97922610    | 101.208 |
| Chrm1         | 0 | 0        | 0 | 49   | 0.816667 | 0.070351 | 0.920758 | Unclassified | chr19:8736494-8758092     | 19.599  |
| Chrd          | 0 | 0        | 0 | 22   | 0.366667 | 0.183166 | 0.302983 | Unclassified | chr16:20731199-20742457   | 9.259   |
| Chm           | 0 | 0        | 0 | 264  | 4.4      | 1.24673  | 9.545997 | Unclassified | chrX:110154200-110301124  | 144.925 |
| Chka          | 0 | 0        | 0 | 659  | 10.98333 | 5.25242  | 33.66698 | Unclassified | chr19:3849772-3894367     | 42.596  |
| Ak3           | 0 | 0        | 0 | 388  | 6.466667 | 6.59864  | 9.179306 | Unclassified | chr19:29095321-29124392   | 27.072  |
| Tas2r137      | 0 | 0        | 0 | 10   | 0.166667 | 0.025582 | 6        | Unclassified | chr6:40439236-40442238    | 1.003   |
| Scml2         | 0 | 0        | 0 | 24   | 0.4      | 0.621308 | 8.708999 | Unclassified | chrX:157598703-157696145  | 95.443  |
| Hspb3         | 0 | 0        | 0 | 2    | 0.033333 | 0.067101 | 2        | Unclassified | chr13:114453103-114455884 | 0.782   |
| Rgs17         | 0 | 0        | 0 | 60   | 1        | 0.042626 | 1.880421 | Unclassified | chr10:4422140-4520875     | 96.736  |
| Tsr2          | 0 | 0        | 0 | 224  | 3.733333 | 4.0059   | 10.32824 | Unclassified | chrX:147521637-147533086  | 9.45    |
| Tnrc6b        | 0 | 0        | 0 | 2247 | 37.45    | 4.10391  | 10.67015 | Unclassified | chr15:80627039-80771516   | 142.478 |
| Zbtb8b        | 0 | 0        | 0 | 17   | 0.283333 | 0.054571 | 0        | Unclassified | chr4:129103008-129120062  | 15.055  |
| Riok3         | 0 | 0        | 0 | 796  | 13.26667 | 11.2016  | 12.87013 | Unclassified | chr18:12285358-12315876   | 28.519  |
| Rock2         | 0 | 0        | 0 | 1168 | 19.46667 | 5.3935   | 45.0556  | Unclassified | chr12:16899783-16995080   | 93.298  |
| Slc22a8       | 0 | 0        | 0 | 37   | 0.616667 | 0.073657 | 0.730917 | Unclassified | chr19:8663743-8686324     | 20.582  |
| Sema3d        | 0 | 0        | 0 | 87   | 1.45     | 0.120654 | 1.428131 | Unclassified | chr5:12381165-12588943    | 205.779 |
| Rnu73a        | 0 | 0        | 0 | 39   | 0.65     | 0        | 31       | Unclassified | chr3:85942712-85944780    | 0.069   |
| Robo1         | 0 | 0        | 0 | 223  | 3.716667 | 0.059225 | 0        | Unclassified | chr16:72661393-73046345   | 382.953 |
| Rock1         | 0 | 0        | 0 | 1100 | 18.33333 | 6.80032  | 42.12327 | Unclassified | chr18:10064398-10183790   | 117.393 |
| Tmem132e      | 0 | 0        | 0 | 93   | 1.55     | 0.224706 | 1.607332 | Unclassified | chr11:82200401-82259829   | 57.429  |
| Lcn13         | 0 | 0        | 0 | 7    | 0.116667 | 0        | 0.310725 | Unclassified | chr2:25553593-25558846    | 3.254   |
| E030010A14Rik | 0 | 0        | 0 | 6    | 0.1      | 0.011333 | 1.075679 | Unclassified | chr19:24746497-24754151   | 5.655   |
| Vps54         | 0 | 0        | 0 | 1094 | 18.23333 | 6.00625  | 21.78261 | Unclassified | chr11:21136891-21221136   | 82.246  |
| Pgm5          | 0 | 0        | 0 | 172  | 2.866667 | 0.104096 | 0.517844 | Unclassified | chr19:24752750-24938332   | 183.583 |
| Olfr1419      | 0 | 0        | 0 | 3    | 0.05     | 0.024838 | 2        | Unclassified | chr19:11944672-11947704   | 1.033   |
| Txnrc15       | 0 | 0        | 0 | 244  | 4.066667 | 12.5377  | 12.91534 | Unclassified | chr13:55814010-55827588   | 11.579  |
| Tmem52        | 0 | 0        | 0 | 15   | 0.25     | 2.14844  | 12       | Unclassified | chr4:154841223-154844805  | 1.583   |
| Ii1f8         | 0 | 0        | 0 | 4    | 0.066667 | 0        | 1.495777 | Unclassified | chr2:24006691-24015623    | 6.933   |
| Pxdn          | 0 | 0        | 0 | 86   | 1.433333 | 0.067778 | 0.978976 | Unclassified | chr12:30620900-30702522   | 79.623  |
| Trpv6         | 0 | 0        | 0 | 23   | 0.383333 | 0.013481 | 0        | Unclassified | chr6:41570619-41588404    | 15.786  |
| Olfr317       | 0 | 0        | 0 | 3    | 0.05     | 0.026049 | 0.11426  | Unclassified | chr11:58545597-58548725   | 1.129   |
| Olfr332       | 0 | 0        | 0 | 2    | 0.033333 | 0.089268 | 1        | Unclassified | chr11:58303250-58306255   | 1.006   |
| Olfr1089      | 0 | 0        | 0 | 1    | 0.016667 | 0        | 1        | Unclassified | chr2:86572832-86575767    | 0.936   |
| Olfr1287      | 0 | 0        | 0 | 2    | 0.033333 | 0        | 2        | Unclassified | chr2:111287298-111290216  | 0.919   |
| Olfr1028      | 0 | 0        | 0 | 0    | 0        | 0.015817 | 0        | Unclassified | chr2:85789221-85792196    | 0.976   |
| Abca1         | 0 | 0        | 0 | 191  | 3.183333 | 0.298479 | 3.304862 | Unclassified | chr4:53043660-53174767    | 129.108 |
| 6230409E13Rik | 0 | 0        | 0 | 77   | 1.283333 | 0.138524 | 1.449038 | Unclassified | chr4:21856472-21928608    | 70.137  |
| Thrsp         | 0 | 0        | 0 | 34   | 0.566667 | 0.061736 | 0.937112 | Unclassified | chr7:104561466-104568020  | 4.555   |
| Ccdc3         | 0 | 0        | 0 | 96   | 1.6      | 0.279664 | 2.011928 | Unclassified | chr2:5056821-5151912      | 93.092  |
| Orm3          | 0 | 0        | 0 | 122  | 2.033333 | 0.106261 | 1.07772  | Elongating   | chr4:63015195-63020545    | 3.351   |
| Thrb          | 0 | 0        | 0 | 304  | 5.066667 | 0.215426 | 2.806396 | Unclassified | chr14:18491473-18870602   | 377.13  |
| Opn5          | 0 | 0        | 0 | 34   | 0.566667 | 0.02108  | 0.625871 | Unclassified | chr17:42693731-42750262   | 54.532  |
| Ddx26b        | 0 | 0        | 0 | 566  | 9.433333 | 6.37071  | 35.37315 | Stalled      | chrX:53706053-53761016    | 52.964  |
| Gpr141        | 0 | 0        | 0 | 58   | 0.966667 | 0.037333 | 0        | Unclassified | chr13:19841550-19918126   | 74.577  |
| Mmgt1         | 0 | 0        | 0 | 158  | 2.633333 | 2.51638  | 23.27554 | Stalled      | chrX:53838688-53853096    | 12.409  |

|               |   |          |   |      |          |          |          |              |                           |          |
|---------------|---|----------|---|------|----------|----------|----------|--------------|---------------------------|----------|
| Ipo4          | 0 | 0        | 0 | 479  | 7.983333 | 12.5305  | 7.867191 | Unclassified | chr14:56244465-56256515   | 10.051   |
| Slc9a6        | 0 | 0        | 0 | 146  | 2.433333 | 2.38834  | 20.50719 | Stalled      | chrX:53861011-53917406    | 54.396   |
| Klf17         | 0 | 0        | 0 | 3    | 0.05     | 0.094444 | 0.889    | Unclassified | chr4:117429263-117440271  | 9.009    |
| Gpr112        | 0 | 0        | 0 | 7    | 0.016667 | 0.024273 | 0.726627 | Unclassified | chrX:54214582-54233529    | 16.948   |
| Sv2c          | 0 | 0        | 0 | 215  | 3.583333 | 1.05781  | 0.448112 | Unclassified | chr13:96729397-96904532   | 173.136  |
| Ficd          | 0 | 0        | 0 | 575  | 9.583333 | 2.85404  | 4.25177  | Unclassified | chr5:114183790-114190616  | 4.827    |
| Cyp20a1       | 0 | 0        | 0 | 479  | 7.983333 | 4.60084  | 51.87509 | Stalled      | chr1:60398215-60444231    | 44.017   |
| Rnf166        | 0 | 0        | 0 | 309  | 5.15     | 9.28559  | 10.27667 | Unclassified | chr8:124990046-125001964  | 9.919    |
| Styx          | 0 | 0        | 0 | 252  | 4.2      | 2.0788   | 27.75505 | Stalled      | chr14:45968860-45996559   | 25.7     |
| Tmem130       | 0 | 0        | 0 | 31   | 0.516667 | 0.117194 | 2.434126 | Unclassified | chr5:145496783-145524447  | 25.665   |
| Rfpl4         | 0 | 0        | 0 | 15   | 0.25     | 0.017739 | 0.337968 | Unclassified | chr7:5061388-5070513      | 7.126    |
| Eil2          | 0 | 613.7025 | 0 | 2078 | 34.63333 | 22.8789  | 9.877311 | Unclassified | chr13:75842931-75909806   | 64.876   |
| Sidt1         | 0 | 0        | 0 | 146  | 2.433333 | 1.87255  | 8.227905 | Unclassified | chr16:44240294-44334951   | 92.658   |
| Ttc36         | 0 | 0        | 0 | 124  | 2.066667 | 3.5559   | 1.407523 | Elongating   | chr9:44607482-44613034    | 3.553    |
| Gen1          | 0 | 0        | 0 | 548  | 9.133333 | 3.56757  | 60.3778  | Stalled      | chr12:11247731-11274593   | 24.863   |
| Zfp286        | 0 | 0        | 0 | 75   | 1.25     | 0.490193 | 24.62916 | Stalled      | chr11:62591888-62604919   | 11.032   |
| Accn5         | 0 | 0        | 0 | 10   | 0.166667 | 0.038673 | 0.721474 | Unclassified | chr3:81798843-81825155    | 24.313   |
| Sertad2       | 0 | 0        | 0 | 1048 | 17.46667 | 4.98785  | 20.65055 | Unclassified | chr11:20441255-20553026   | 109.772  |
| Expi          | 0 | 0        | 0 | 1    | 0.016667 | 0        | 0        | Unclassified | chr11:83520505-83524862   | 2.358    |
| Fam53a        | 0 | 0        | 0 | 838  | 13.96667 | 16.8084  | 22.23092 | Unclassified | chr5:33943002-33974284    | 29.283   |
| Sorcs1        | 0 | 0        | 0 | 281  | 4.683333 | 0.140506 | 0.654301 | Unclassified | chr19:50222150-50755102   | 530.953  |
| Klrc3         | 0 | 0        | 0 | 3    | 0.05     | 0.011874 | 0        | Unclassified | chr6:129589102-129595306  | 4.205    |
| Shisa4        | 0 | 0        | 0 | 18   | 0.3      | 0.420031 | 1.086065 | Unclassified | chr1:137268032-137273640  | 3.609    |
| Gltscr2       | 0 | 0        | 0 | 978  | 16.3     | 171.83   | 2.807302 | Elongating   | chr7:16523186-16533457    | 8.272    |
| Inpp5j        | 0 | 0        | 0 | 25   | 0.416667 | 0.036903 | 0.312625 | Unclassified | chr11:3394274-3406824     | 10.551   |
| Oosp1         | 0 | 0        | 0 | 23   | 0.383333 | 2.3424   | 5.078077 | Unclassified | chr19:11741949-11767541   | 23.593   |
| Trps1         | 0 | 0        | 0 | 367  | 6.116667 | 0.628093 | 12.06183 | Stalled      | chr15:50486304-50723587   | 235.284  |
| Pdcd2l        | 0 | 0        | 0 | 331  | 5.516667 | 12.9947  | 13.04653 | Unclassified | chr7:34969515-34983666    | 12.152   |
| Ddx4          | 0 | 0        | 0 | 44   | 0.733333 | 0.041657 | 1.127446 | Unclassified | chr13:113388542-113444518 | 53.977   |
| Gemin8        | 0 | 0        | 0 | 68   | 1.133333 | 1.7709   | 15.78275 | Stalled      | chrX:162606411-162628444  | 20.034   |
| Cyp2j9        | 0 | 0        | 0 | 16   | 0.266667 | 0.784172 | 3.440327 | Unclassified | chr4:96235119-96260176    | 23.058   |
| Kbtbd5        | 0 | 0        | 0 | 23   | 0.383333 | 0.245363 | 1.228905 | Unclassified | chr9:121684724-121692937  | 6.214    |
| Folh1         | 0 | 0        | 0 | 19   | 0.316667 | 0.021737 | 0        | Unclassified | chr7:93867485-93926374    | 56.89    |
| Nucb2         | 0 | 0        | 0 | 236  | 3.933333 | 7.27012  | 19.83528 | Stalled      | chr7:123645887-123684102  | 36.216   |
| Ube2k         | 0 | 0        | 0 | 1049 | 17.48333 | 18.7374  | 28.38432 | Unclassified | chr5:65926499-65990228    | 61.73    |
| D930014E17Rik | 0 | 0        | 0 | 281  | 4.683333 | 15.6973  | 18.60408 | Unclassified | chr7:116845250-116855695  | 8.446    |
| Pgrmc1        | 0 | 0        | 0 | 333  | 5.55     | 17.7252  | 24.09048 | Unclassified | chrX:34136219-34146074    | 7.856    |
| H2-BI         | 0 | 0        | 0 | 21   | 0.35     | 0        | 2.302037 | Unclassified | chr17:36216992-36223404   | 4.413    |
| Cfb           | 0 | 0        | 0 | 204  | 3.4      | 0.486104 | 0.425396 | Unclassified | chr17:34993323-35001459   | 6.137    |
| Ntn1          | 0 | 0        | 0 | 376  | 6.266667 | 0.227826 | 0.968759 | Unclassified | chr11:68022865-68202328   | 177.464  |
| Grb10         | 0 | 0        | 0 | 142  | 2.366667 | 0.130336 | 0.864606 | Unclassified | chr11:11830510-11939358   | 106.849  |
| Gpx5          | 0 | 0        | 0 | 5    | 0.083333 | 0.133749 | 0        | Unclassified | chr13:21378297-21386555   | 6.259    |
| Sifn4         | 0 | 0        | 0 | 21   | 0.35     | 0.6905   | 0.452178 | Unclassified | chr11:82986687-83003718   | 15.032   |
| Dpyd          | 0 | 0        | 0 | 395  | 6.583333 | 0.028805 | 0.689318 | Unclassified | chr3:118263095-119135836  | 870.742  |
| Col11a2       | 0 | 0        | 0 | 207  | 3.45     | 5.52947  | 12.1153  | Stalled      | chr17:34174381-34203187   | 26.807   |
| Oxt           | 0 | 0        | 0 | 6    | 0.1      | 0.720733 | 3        | Unclassified | chr2:130399908-130402724  | 0.817    |
| Ksr2          | 0 | 0        | 0 | 407  | 6.783333 | 0.70157  | 3.267032 | Unclassified | chr5:117862008-118213330  | 349.323  |
| Luzp1         | 0 | 0        | 0 | 287  | 4.783333 | 0.847632 | 21.6861  | Stalled      | chr4:136023675-136105233  | 79.559   |
| Zbtb16        | 0 | 0        | 0 | 216  | 3.6      | 0.067665 | 0.457747 | Unclassified | chr9:48462401-48466050    | 181.65   |
| Nek11         | 0 | 0        | 0 | 437  | 7.283333 | 0.126943 | 65.48872 | Stalled      | chr9:105064796-105299617  | 232.822  |
| Trim44        | 0 | 0        | 0 | 735  | 12.25    | 13.2563  | 31.22349 | Unclassified | chr2:102140275-102243057  | 100.783  |
| Ckap2         | 0 | 0        | 0 | 236  | 3.933333 | 4.80403  | 23.15385 | Stalled      | chr8:23278623-23298291    | 17.669   |
| Fam109a       | 0 | 0        | 0 | 133  | 2.216667 | 2.00829  | 11.90438 | Stalled      | chr5:122297036-122304608  | 5.573    |
| Arl4d         | 0 | 0        | 0 | 245  | 4.083333 | 0.732626 | 57.65124 | Stalled      | chr11:101524854-101529146 | 2.293    |
| 9930013L23Rik | 0 | 0        | 0 | 184  | 3.066667 | 0.050451 | 1.835556 | Unclassified | chr7:91081367-91237015    | 153.649  |
| Efna4         | 0 | 0        | 0 | 21   | 0.35     | 1.2206   | 2.133607 | Unclassified | chr3:89137314-89143950    | 4.637    |
| Nkain2        | 0 | 0        | 0 | 440  | 7.333333 | 0.052001 | 0.733431 | Unclassified | chr10:31409125-32611721   | 1200.597 |
| Kctd8         | 0 | 0        | 0 | 106  | 1.766667 | 0.137524 | 2.076029 | Unclassified | chr5:69500523-69734948    | 232.426  |
| Slc14a1       | 0 | 0        | 0 | 154  | 2.566667 | 3.01943  | 1.447232 | Unclassified | chr18:78296830-78322165   | 23.336   |
| Lce1e         | 0 | 0        | 0 | 0    | 0        | 0        | 0        | Unclassified | chr3:92511321-92514996    | 1.676    |
| 1110028C15Rik | 0 | 0        | 0 | 815  | 13.58333 | 0.584901 | 31.38253 | Unclassified | chr1:66765816-66866169    | 98.354   |
| Hpd1          | 0 | 0        | 0 | 99   | 1.65     | 3.51942  | 2.070168 | Unclassified | chr4:116492511-116496113  | 1.603    |
| Vmn2r50       | 0 | 0        | 0 | 1    | 0.016667 | 0        | 0        | Unclassified | chr7:10622583-10640527    | 15.945   |
| Tmem195       | 0 | 0        | 0 | 146  | 2.433333 | 0.148681 | 0        | Unclassified | chr12:37966225-38308519   | 340.295  |
| Defb45        | 0 | 0        | 0 | 3    | 0.05     | 0        | 0.696602 | Unclassified | chr2:152418926-152424221  | 3.296    |
| Neurod1       | 0 | 0        | 0 | 3    | 0.05     | 0.262082 | 0.59976  | Unclassified | chr2:79292797-79298793    | 3.997    |
| AI429214      | 0 | 0        | 0 | 29   | 0.483333 | 3.61376  | 7.448952 | Unclassified | chr8:38054628-38058585    | 1.958    |
| Slc27a6       | 0 | 0        | 0 | 35   | 0.583333 | 0.064131 | 1.269665 | Unclassified | chr18:58713893-58772523   | 56.631   |
| Adck4         | 0 | 0        | 0 | 296  | 4.933333 | 7.39588  | 9.84032  | Unclassified | chr7:28016031-28042968    | 24.938   |
| Zfp74         | 0 | 0        | 0 | 91   | 1.516667 | 0.755947 | 1.278737 | Unclassified | chr7:30717809-30738912    | 19.104   |
| Mgst3         | 0 | 0        | 0 | 151  | 2.516667 | 1.45263  | 44.27502 | Stalled      | chr1:169302514-169325928  | 21.415   |
| Caprin2       | 0 | 0        | 0 | 269  | 4.483333 | 0.85518  | 120.5123 | Stalled      | chr6:148791033-148846648  | 53.616   |
| Lphn2         | 0 | 0        | 0 | 238  | 3.966667 | 0.679605 | 0.368086 | Unclassified | chr3:148478549-148619599  | 139.051  |
| Fscn2         | 0 | 0        | 0 | 37   | 0.616667 | 0        | 0.864097 | Unclassified | chr11:120220847-120229487 | 6.641    |
| Arhgap21      | 0 | 0        | 0 | 677  | 11.28333 | 4.04411  | 4.062781 | Unclassified | chr2:20769546-20891348    | 119.803  |
| V1rh10        | 0 | 0        | 0 | 2    | 0.033333 | 0        | 2        | Unclassified | chr13:22919062-22921983   | 0.922    |
| Fn3krp        | 0 | 0        | 0 | 98   | 1.633333 | 4.21236  | 15.86495 | Stalled      | chr11:121280686-121292080 | 9.395    |
| V1rel2        | 0 | 0        | 0 | 1    | 0.016667 | 0        | 0        | Unclassified | chr7:27396137-27399097    | 0.961    |
| V1rel1        | 0 | 0        | 0 | 1    | 0.016667 | 0.025229 | 0        | Unclassified | chr7:10859176-10862700    | 1.525    |
| V1rg11        | 0 | 0        | 0 | 0    | 0        | 0        | 0        | Unclassified | chr7:12947156-12950113    | 0.958    |
| Arhgef11      | 0 | 0        | 0 | 425  | 7.083333 | 3.15284  | 2.034375 | Unclassified | chr3:87420672-87541955    | 119.284  |
| V1rk1         | 0 | 0        | 0 | 1    | 0.016667 | 0.028866 | 0        | Unclassified | chr7:13716819-13719707    | 0.889    |
| V1rj2         | 0 | 0        | 0 | 0    | 0        | 0.047152 | 0        | Unclassified | chr7:13802687-13805638    | 0.952    |
| Vsig4         | 0 | 0        | 0 | 8    | 0.133333 | 0        | 0        | Unclassified | chrX:93442541-93490777    | 46.237   |
| V1rl1         | 0 | 0        | 0 | 0    | 0        | 0        | 0        | Unclassified | chr7:11216935-11219832    | 0.898    |
| Pcolce2       | 0 | 0        | 0 | 59   | 0.983333 | 0.20605  | 2.034398 | Unclassified | chr9:95536046-95595970    | 57.925   |



|                      |   |   |   |      |          |          |          |              |                           |         |
|----------------------|---|---|---|------|----------|----------|----------|--------------|---------------------------|---------|
| <b>C1qtnf7</b>       | 0 | 0 | 0 | 78   | 1.3      | 0.047177 | 0        | Unclassified | chr5:43904807-44007824    | 101.018 |
| <b>Eif3c</b>         | 0 | 0 | 0 | 730  | 12.16667 | 80.3697  | 8.381975 | Unclassified | chr7:133690424-133711880  | 19.457  |
| <b>Fgb</b>           | 0 | 0 | 0 | 2    | 0.033333 | 0.024443 | 0        | Unclassified | chr3:82846226-82855712    | 7.487   |
| <b>Brip1</b>         | 0 | 0 | 0 | 905  | 15.08333 | 2.24741  | 67.85183 | Stalled      | chr11:85871639-86016695   | 143.057 |
| <b>Elavl2</b>        | 0 | 0 | 0 | 90   | 1.5      | 0.076432 | 0.627466 | Unclassified | chr4:90917456-91068675    | 149.22  |
| <b>Htr5b</b>         | 0 | 0 | 0 | 30   | 0.5      | 0.281396 | 2.816469 | Unclassified | chr1:123406349-123427042  | 18.694  |
| <b>Htr6</b>          | 0 | 0 | 0 | 50   | 0.833333 | 0.301118 | 0.670723 | Unclassified | chr4:138617323-138632704  | 13.382  |
| <b>Cyp2d12</b>       | 0 | 0 | 0 | 6    | 0.1      | 0.043396 | 0.453328 | Unclassified | chr15:82383527-82389843   | 4.317   |
| <b>Slc6a4</b>        | 0 | 0 | 0 | 58   | 0.966667 | 0.074649 | 0.74641  | Unclassified | chr11:76810098-76845845   | 33.748  |
| <b>Htr2c</b>         | 0 | 0 | 0 | 39   | 0.65     | 0.013491 | 0.860174 | Unclassified | chrX:143395055-143631820  | 234.766 |
| <b>Htr3a</b>         | 0 | 0 | 0 | 10   | 0.166667 | 0.037239 | 0        | Unclassified | chr9:48707317-48721204    | 11.888  |
| <b>Htr5a</b>         | 0 | 0 | 0 | 12   | 0.2      | 0.029816 | 1.096698 | Unclassified | chr5:28166486-28181626    | 13.141  |
| <b>Med14</b>         | 0 | 0 | 0 | 617  | 10.28333 | 3.37163  | 62.31977 | Stalled      | chrX:12252496-12341099    | 86.604  |
| <b>Acot1</b>         | 0 | 0 | 0 | 12   | 0.2      | 2.32445  | 2.721923 | Unclassified | chr12:85348451-85358619   | 8.169   |
| <b>Rap1a</b>         | 0 | 0 | 0 | 3878 | 64.63333 | 50.3609  | 5.851225 | Unclassified | chr3:105531199-105606254  | 73.056  |
| <b>6030458C11Rik</b> | 0 | 0 | 0 | 479  | 7.983333 | 4.93742  | 18.11647 | Unclassified | chr15:12737931-12756412   | 16.482  |
| <b>4930404H21Rik</b> | 0 | 0 | 0 | 17   | 0.283333 | 0.070035 | 0.968824 | Unclassified | chr7:140778706-140795798  | 15.093  |
| <b>Zfp414</b>        | 0 | 0 | 0 | 347  | 5.783333 | 15.477   | 6.513076 | Unclassified | chr17:33764046-33768656   | 2.611   |
| <b>V1rb4</b>         | 0 | 0 | 0 | 0    | 0        | 0        | 0        | Unclassified | chr6:89841267-89844200    | 0.934   |
| <b>Ctsj</b>          | 0 | 0 | 0 | 3    | 0.05     | 0        | 0.698568 | Unclassified | chr13:61101638-61109272   | 5.635   |
| <b>Pcdh8</b>         | 0 | 0 | 0 | 14   | 0.233333 | 0.145208 | 0.282125 | Unclassified | chr14:80166583-80173119   | 4.537   |
| <b>Filip1</b>        | 0 | 0 | 0 | 158  | 2.633333 | 0.170515 | 1.016772 | Unclassified | chr9:79663368-79827689    | 162.322 |
| <b>Tnpo1</b>         | 0 | 0 | 0 | 2303 | 38.38333 | 12.9198  | 9.101918 | Unclassified | chr13:99612035-99698339   | 84.305  |
| <b>V1rb7</b>         | 0 | 0 | 0 | 2    | 0.033333 | 0        | 0        | Unclassified | chr6:89662196-89665129    | 0.934   |
| <b>Vsig1</b>         | 0 | 0 | 0 | 12   | 0.2      | 0.029382 | 0        | Unclassified | chrX:137440146-137474011  | 31.866  |
| <b>Clip4</b>         | 0 | 0 | 0 | 69   | 1.15     | 0.091301 | 1.148446 | Unclassified | chr17:72117030-72207691   | 88.662  |
| <b>V1rb1</b>         | 0 | 0 | 0 | 3    | 0.05     | 0.013737 | 3        | Unclassified | chr6:90055268-90058201    | 0.934   |
| <b>Usp54</b>         | 0 | 0 | 0 | 201  | 3.35     | 0.591814 | 0.782384 | Unclassified | chr14:21368133-21439576   | 69.444  |
| <b>Prr12</b>         | 0 | 0 | 0 | 541  | 9.016667 | 5.46496  | 7.249256 | Unclassified | chr7:52283076-52310251    | 25.176  |
| <b>Phf2011</b>       | 0 | 0 | 0 | 629  | 10.48333 | 4.1707   | 27.34757 | Unclassified | chr15:66407133-66476817   | 67.685  |
| <b>Nkg7</b>          | 0 | 0 | 0 | 7    | 0.116667 | 0.267992 | 4        | Unclassified | chr7:50690507-50693616    | 1.11    |
| <b>Fryl</b>          | 0 | 0 | 0 | 2487 | 41.45    | 5.8155   | 12.83433 | Unclassified | chr5:73411429-73649857    | 236.429 |
| <b>Snaip</b>         | 0 | 0 | 0 | 127  | 2.116667 | 0.021062 | 2.212025 | Unclassified | chr18:52925362-53075584   | 148.223 |
| <b>Rab32</b>         | 0 | 0 | 0 | 59   | 0.983333 | 4.39742  | 12.47453 | Stalled      | chr10:10264836-10280005   | 13.17   |
| <b>2610027L16Rik</b> | 0 | 0 | 0 | 371  | 6.183333 | 14.1351  | 8.845895 | Unclassified | chr14:56362529-56374471   | 9.943   |
| <b>Gm13271</b>       | 0 | 0 | 0 | 1    | 0.016667 | 0        | 1        | Unclassified | chr4:88398771-88401320    | 0.55    |
| <b>Lao1</b>          | 0 | 0 | 0 | 21   | 0.35     | 0.013091 | 0.627606 | Unclassified | chr4:118632571-118641515  | 6.945   |
| <b>Mobp</b>          | 0 | 0 | 0 | 32   | 0.533333 | 0.060145 | 0.916009 | Unclassified | chr9:120056859-120085209  | 26.351  |
| <b>Arhgef5</b>       | 0 | 0 | 0 | 37   | 0.616667 | 0.056888 | 3.132444 | Unclassified | chr6:43213642-43239319    | 23.678  |
| <b>Satb2</b>         | 0 | 0 | 0 | 129  | 2.15     | 0.249732 | 1.162697 | Unclassified | chr1:56850824-57030178    | 177.355 |
| <b>Olfr1301</b>      | 0 | 0 | 0 | 1    | 0.016667 | 0        | 1        | Unclassified | chr2:111592407-111595346  | 0.94    |
| <b>B4galt2</b>       | 0 | 0 | 0 | 89   | 1.483333 | 0.428803 | 8.436843 | Unclassified | chr4:117545623-117558074  | 10.452  |
| <b>Ska1</b>          | 0 | 0 | 0 | 267  | 4.45     | 5.72977  | 12.09636 | Unclassified | chr18:74354953-74369472   | 12.52   |
| <b>Gtf2h5</b>        | 0 | 0 | 0 | 380  | 6.333333 | 25.4001  | 27.53173 | Unclassified | chr17:6077827-6085485     | 5.659   |
| <b>Olfr1294</b>      | 0 | 0 | 0 | 0    | 0        | 0.040947 | 0        | Unclassified | chr2:111377505-111380444  | 0.94    |
| <b>Corin</b>         | 0 | 0 | 0 | 188  | 3.133333 | 0.069088 | 2.117118 | Unclassified | chr5:72691263-72897779    | 204.517 |
| <b>Spink3</b>        | 0 | 0 | 0 | 7    | 0.116667 | 0        | 0        | Unclassified | chr18:43887722-43898891   | 9.17    |
| <b>Olfr218</b>       | 0 | 0 | 0 | 2    | 0.033333 | 0        | 1        | Unclassified | chr1:175131488-175134428  | 0.941   |
| <b>Ptpmt1</b>        | 0 | 0 | 0 | 341  | 5.683333 | 12.3576  | 10.23511 | Unclassified | chr2:90750869-90760207    | 7.339   |
| <b>C77370</b>        | 0 | 0 | 0 | 42   | 0.7      | 0.079996 | 3.073164 | Unclassified | chrX:101272774-101398456  | 123.683 |
| <b>Es22</b>          | 0 | 0 | 0 | 24   | 0.4      | 0.032137 | 0        | Unclassified | chr8:95725117-95755440    | 28.324  |
| <b>B930041F14Rik</b> | 0 | 0 | 0 | 130  | 2.166667 | 5.39446  | 5.286293 | Unclassified | chr4:155066580-155070592  | 2.013   |
| <b>Aox311</b>        | 0 | 0 | 0 | 137  | 2.283333 | 0.069711 | 1.71614  | Unclassified | chr1:58333169-58436107    | 100.939 |
| <b>Olfr1102</b>      | 0 | 0 | 0 | 0    | 0        | 0        | 0        | Unclassified | chr2:86840088-86843151    | 1.064   |
| <b>Klrg1</b>         | 0 | 0 | 0 | 8    | 0.133333 | 0.235594 | 0.692004 | Unclassified | chr6:122220618-122234851  | 12.234  |
| <b>Gm13277</b>       | 0 | 0 | 0 | 5    | 0.083333 | 0        | 0        | Unclassified | chr4:88431790-88435346    | 1.557   |
| <b>Trim32</b>        | 0 | 0 | 0 | 141  | 2.35     | 4.06907  | 11.87037 | Stalled      | chr4:65264019-65277274    | 11.256  |
| <b>Map3k2</b>        | 0 | 0 | 0 | 561  | 9.35     | 1.83481  | 30.99593 | Stalled      | chr18:32320742-32396405   | 73.664  |
| <b>Cox11</b>         | 0 | 0 | 0 | 319  | 5.316667 | 8.04446  | 22.87879 | Unclassified | chr11:90497497-90507291   | 7.795   |
| <b>Zfp108</b>        | 0 | 0 | 0 | 11   | 0.183333 | 0.227711 | 3.425335 | Unclassified | chr7:25037812-25047463    | 7.652   |
| <b>Gucy1a2</b>       | 0 | 0 | 0 | 121  | 2.016667 | 0.116599 | 1.507236 | Unclassified | chr9:3530353-3897342      | 364.99  |
| <b>Olfr1105</b>      | 0 | 0 | 0 | 1    | 0.016667 | 0        | 0        | Unclassified | chr2:86873437-86876376    | 0.94    |
| <b>Olfr963</b>       | 0 | 0 | 0 | 0    | 0        | 0        | 0        | Unclassified | chr9:39474643-39477579    | 0.937   |
| <b>Olfr967</b>       | 0 | 0 | 0 | 0    | 0        | 0        | 0        | Unclassified | chr9:39555972-39558905    | 0.934   |
| <b>Samd5</b>         | 0 | 0 | 0 | 33   | 0.55     | 0.12842  | 0        | Unclassified | chr10:9347056-9397006     | 47.951  |
| <b>Olfr304</b>       | 0 | 0 | 0 | 0    | 0        | 0        | 0        | Unclassified | chr7:93534166-93537168    | 1.003   |
| <b>Acaa2</b>         | 0 | 0 | 0 | 361  | 6.016667 | 9.32839  | 45.03172 | Stalled      | chr18:74936865-74965861   | 26.997  |
| <b>Cep135</b>        | 0 | 0 | 0 | 478  | 7.966667 | 3.06996  | 0.622929 | Unclassified | chr5:77018738-77075491    | 54.754  |
| <b>Dapl1</b>         | 0 | 0 | 0 | 18   | 0.3      | 0.326342 | 1.685287 | Unclassified | chr2:59320713-59342940    | 20.228  |
| <b>Tlr12</b>         | 0 | 0 | 0 | 114  | 1.9      | 3.79934  | 1.012637 | Elongating   | chr4:128292689-128297863  | 3.175   |
| <b>Hmbs</b>          | 0 | 0 | 0 | 683  | 11.38333 | 13.3243  | 2.76216  | Elongating   | chr9:44144430-44154311    | 7.882   |
| <b>Rabggt</b>        | 0 | 0 | 0 | 229  | 3.816667 | 6.06208  | 17.1291  | Stalled      | chr14:56334713-56343013   | 6.301   |
| <b>Abcc4</b>         | 0 | 0 | 0 | 1180 | 19.66667 | 2.32175  | 18.1335  | Unclassified | chr14:118881913-119107441 | 223.529 |
| <b>Hao2</b>          | 0 | 0 | 0 | 10   | 0.166667 | 0        | 0.663085 | Unclassified | chr3:98678441-98699153    | 18.713  |
| <b>Mgn1</b>          | 0 | 0 | 0 | 1    | 0.016667 | 0.045208 | 1        | Unclassified | chr12:11215187-11217754   | 0.568   |
| <b>Nmu</b>           | 0 | 0 | 0 | 40   | 0.666667 | 0.047061 | 1.794253 | Unclassified | chr5:76762519-76794802    | 30.284  |
| <b>3200002M19Rik</b> | 0 | 0 | 0 | 469  | 7.816667 | 20.5716  | 9.002723 | Unclassified | chr7:109042928-109048057  | 3.13    |
| <b>Dnajc2</b>        | 0 | 0 | 0 | 890  | 14.83333 | 29.8631  | 11.35658 | Unclassified | chr5:21263094-21292983    | 27.89   |
| <b>Prodh2</b>        | 0 | 0 | 0 | 18   | 0.3      | 0.014107 | 0.555503 | Unclassified | chr7:31276676-31298421    | 19.746  |
| <b>Fxyd1</b>         | 0 | 0 | 0 | 18   | 0.3      | 0.592252 | 0.351001 | Unclassified | chr7:31836696-31842675    | 3.98    |
| <b>Dcbld2</b>        | 0 | 0 | 0 | 242  | 4.033333 | 0.734903 | 8.464067 | Unclassified | chr16:58406647-58469858   | 61.212  |
| <b>Mtap7d3</b>       | 0 | 0 | 0 | 30   | 0.5      | 0.449246 | 9.136655 | Unclassified | chrX:54051129-54077502    | 24.374  |
| <b>Izumo1</b>        | 0 | 0 | 0 | 44   | 0.733333 | 0.360301 | 0.449674 | Unclassified | chr7:52875180-52882612    | 5.433   |
| <b>Ccbe1</b>         | 0 | 0 | 0 | 217  | 3.616667 | 0.065842 | 2.093892 | Unclassified | chr18:66216509-66453492   | 234.984 |
| <b>Phospho2</b>      | 0 | 0 | 0 | 230  | 3.833333 | 4.23251  | 19.2643  | Stalled      | chr2:69625793-69635225    | 7.433   |
| <b>1700052N19Rik</b> | 0 | 0 | 0 | 546  | 9.1      | 7.11303  | 26.17652 | Unclassified | chr10:5891400-5915936     | 22.537  |

|               |   |   |   |     |          |          |          |              |                           |         |
|---------------|---|---|---|-----|----------|----------|----------|--------------|---------------------------|---------|
| A330049M08Rik | 0 | 0 | 0 | 55  | 0.916667 | 0.215187 | 0.721495 | Unclassified | chr4:134925491-134956142  | 28.652  |
| Smarca5       | 0 | 0 | 0 | 643 | 10.71667 | 5.78718  | 18.33161 | Unclassified | chr8:83223842-83265358    | 39.517  |
| Cyp4a12a      | 0 | 0 | 0 | 4   | 0.066667 | 0.066114 | 0        | Unclassified | chr4:114969650-115005420  | 33.771  |
| Olf1269       | 0 | 0 | 0 | 0   | 0        | 0.012543 | 0        | Unclassified | chr2:89958823-89961753    | 0.931   |
| Olf1259       | 0 | 0 | 0 | 0   | 0        | 0.013748 | 0        | Unclassified | chr2:89783340-89786270    | 0.931   |
| Ii22ra1       | 0 | 0 | 0 | 49  | 0.816667 | 0.066064 | 0.649977 | Unclassified | chr4:135282134-135307280  | 23.147  |
| Olf1374       | 0 | 0 | 0 | 18  | 0.3      | 0.040816 | 0.990698 | Unclassified | chr8:74628938-74634408    | 3.471   |
| Olf1396       | 0 | 0 | 0 | 8   | 0.133333 | 0.104516 | 3        | Unclassified | chr11:48926278-48929259   | 0.982   |
| Olf1893       | 0 | 0 | 0 | 2   | 0.033333 | 0.04086  | 1        | Unclassified | chr9:38014636-38017577    | 0.942   |
| Olf11330      | 0 | 0 | 0 | 2   | 0.033333 | 0.027039 | 1        | Unclassified | chr4:118563689-118566637  | 0.949   |
| Rfx3          | 0 | 0 | 0 | 977 | 16.28333 | 0.716823 | 138.7374 | Stalled      | chr19:27836210-28087656   | 249.447 |
| Impa1         | 0 | 0 | 0 | 331 | 5.516667 | 13.1489  | 11.68725 | Unclassified | chr3:10313539-10333439    | 17.901  |
| Cpxm2         | 0 | 0 | 0 | 125 | 2.083333 | 0.076687 | 1.4411   | Unclassified | chr7:139234493-139348424  | 111.932 |
| Cxcl13        | 0 | 0 | 0 | 4   | 0.066667 | 0.033089 | 1.515856 | Unclassified | chr5:96383957-96390087    | 4.131   |
| Ihh           | 0 | 0 | 0 | 22  | 0.366667 | 0.136344 | 0.262356 | Unclassified | chr1:74991891-75000225    | 6.335   |
| Snx12         | 0 | 0 | 0 | 290 | 4.833333 | 10.8036  | 58.81952 | Stalled      | chrX:98293124-98419902    | 124.779 |
| Rbp4          | 0 | 0 | 0 | 12  | 0.2      | 0.536162 | 0.490543 | Unclassified | chr19:38191109-38201811   | 8.703   |
| Rbp3          | 0 | 0 | 0 | 17  | 0.283333 | 0.034008 | 0.828618 | Unclassified | chr14:34765207-34777402   | 10.196  |
| Rbp2          | 0 | 0 | 0 | 28  | 0.466667 | 0        | 0.403117 | Unclassified | chr9:98388955-98410189    | 19.235  |
| Clec1b        | 0 | 0 | 0 | 7   | 0.116667 | 0.035339 | 0.58458  | Unclassified | chr6:129345314-129355349  | 8.036   |
| Smcp          | 0 | 0 | 0 | 3   | 0.05     | 0.04325  | 0        | Unclassified | chr3:92387787-92394946    | 5.16    |
| Mcpt9         | 0 | 0 | 0 | 3   | 0.05     | 0.036525 | 0        | Unclassified | chr14:56645700-56651332   | 3.633   |
| Tpsab1        | 0 | 0 | 0 | 4   | 0.066667 | 0.064566 | 0.397409 | Unclassified | chr17:25480189-25484507   | 2.319   |
| Mcpt8         | 0 | 0 | 0 | 9   | 0.15     | 0.076379 | 0.450642 | Unclassified | chr14:56700999-56706034   | 3.036   |
| Txnrc3        | 0 | 0 | 0 | 39  | 0.65     | 0.030705 | 0.576285 | Unclassified | chr13:19736947-19791629   | 52.683  |
| Trem14        | 0 | 0 | 0 | 14  | 0.233333 | 0.06968  | 1.671464 | Unclassified | chr17:48401660-48414724   | 11.065  |
| Figl1         | 0 | 0 | 0 | 720 | 12       | 10.211   | 17.23308 | Unclassified | chr11:11700290-11710965   | 8.676   |
| Dnmt3b        | 0 | 0 | 0 | 199 | 3.316667 | 1.82795  | 16.01552 | Stalled      | chr2:153473189-153513466  | 38.278  |
| Fancg         | 0 | 0 | 0 | 227 | 3.783333 | 7.15065  | 16.53539 | Unclassified | chr4:43015210-43025173    | 7.964   |
| Cebpb         | 0 | 0 | 0 | 364 | 6.066667 | 11.6458  | 2.984331 | Elongating   | chr2:167512414-167515918  | 1.505   |
| Dhx32         | 0 | 0 | 0 | 272 | 4.533333 | 5.46982  | 7.61332  | Unclassified | chr7:140912617-140970486  | 55.87   |
| Etv5          | 0 | 0 | 0 | 429 | 7.15     | 2.04234  | 30.52441 | Stalled      | chr16:22381385-22441643   | 58.259  |
| Ambn          | 0 | 0 | 0 | 9   | 0.15     | 0.041522 | 0        | Unclassified | chr5:88883035-88897554    | 12.52   |
| Ceacam15      | 0 | 0 | 0 | 15  | 0.25     | 0.138206 | 0.469672 | Unclassified | chr7:17256679-17263054    | 4.376   |
| Alx3          | 0 | 0 | 0 | 46  | 0.766667 | 0.041188 | 0.599508 | Unclassified | chr3:107395948-107408687  | 10.74   |
| Alx4          | 0 | 0 | 0 | 84  | 1.4      | 0.094131 | 0.298726 | Unclassified | chr2:93480590-93518093    | 35.504  |
| Gfer          | 0 | 0 | 0 | 227 | 3.783333 | 14.4571  | 14.241   | Stalled      | chr17:24830135-24835101   | 2.967   |
| Acaa1b        | 0 | 0 | 0 | 16  | 0.266667 | 5.66904  | 1.204668 | Unclassified | chr9:119057160-119068211  | 9.052   |
| Fam89a        | 0 | 0 | 0 | 129 | 2.15     | 1.19798  | 1.186281 | Unclassified | chr8:127264156-127277709  | 11.554  |
| Caskin2       | 0 | 0 | 0 | 159 | 2.65     | 4.06794  | 5.818421 | Unclassified | chr11:115660665-115676906 | 14.242  |
| Cacng5        | 0 | 0 | 0 | 40  | 0.666667 | 0.059238 | 0.505363 | Unclassified | chr11:107735918-107774676 | 36.759  |
| Olf1080       | 0 | 0 | 0 | 0   | 0        | 0        | 0        | Unclassified | chr2:86393337-86400295    | 4.959   |
| Olf1125       | 0 | 0 | 0 | 1   | 0.016667 | 0        | 0        | Unclassified | chr2:87272645-87275602    | 0.958   |
| Adrb1         | 0 | 0 | 0 | 16  | 0.266667 | 0.49907  | 0.597437 | Unclassified | chr19:56794861-56799352   | 2.492   |
| Adh6a         | 0 | 0 | 0 | 11  | 0.183333 | 0.023882 | 0        | Unclassified | chr3:137974249-137994098  | 17.85   |
| Cdv3          | 0 | 0 | 0 | 656 | 10.93333 | 27.5359  | 7.558037 | Unclassified | chr9:103255431-103269309  | 11.879  |
| Gm13178       | 0 | 0 | 0 | 12  | 0.2      | 0.104453 | 0        | Unclassified | chr4:144293093-144313307  | 18.215  |
| Snrpc         | 0 | 0 | 0 | 359 | 5.983333 | 15.0859  | 10.36203 | Unclassified | chr17:27975031-27988912   | 11.882  |
| Olf1278       | 0 | 0 | 0 | 0   | 0        | 0        | 0        | Unclassified | chr2:111130426-111133368  | 0.943   |
| Prokr1        | 0 | 0 | 0 | 65  | 1.083333 | 0.568509 | 4.051141 | Unclassified | chr6:87528585-87542695    | 12.111  |
| Olf1058       | 0 | 0 | 0 | 0   | 0        | 0        | 0        | Unclassified | chr2:86225622-86228573    | 0.952   |
| A230069A22Rik | 0 | 0 | 0 | 28  | 0.466667 | 1.10936  | 0.361187 | Unclassified | chr4:155155699-155161983  | 4.285   |
| Dnajc5g       | 0 | 0 | 0 | 6   | 0.1      | 0.0164   | 0.889968 | Unclassified | chr5:31408691-31414897    | 4.207   |
| Fam160a2      | 0 | 0 | 0 | 68  | 1.133333 | 1.29232  | 9.943162 | Unclassified | chr7:112527123-112550525  | 21.403  |
| Ahcy12        | 0 | 0 | 0 | 827 | 13.78333 | 3.90189  | 29.71571 | Stalled      | chr6:29716442-29862309    | 143.868 |
| Crtc2         | 0 | 0 | 0 | 576 | 9.6      | 49.2542  | 6.480454 | Unclassified | chr3:90056202-90068047    | 9.846   |
| Lrrtm1        | 0 | 0 | 0 | 4   | 0.066667 | 0.091509 | 0.37526  | Unclassified | chr6:77190710-77195511    | 2.802   |
| C2cd4b        | 0 | 0 | 0 | 5   | 0.083333 | 0.308621 | 5        | Unclassified | chr9:67605243-67608738    | 1.496   |
| Tas2r121      | 0 | 0 | 0 | 0   | 0        | 0        | 0        | Unclassified | chr6:132650107-132653025  | 0.919   |
| Tas2r120      | 0 | 0 | 0 | 3   | 0.05     | 0        | 2        | Unclassified | chr6:132604974-132607862  | 0.889   |
| Nr2c2ap       | 0 | 0 | 0 | 335 | 5.583333 | 22.3609  | 3.200563 | Unclassified | chr8:72653231-72657647    | 2.417   |
| Ide           | 0 | 0 | 0 | 358 | 5.966667 | 5.88103  | 1.202824 | Unclassified | chr19:37343230-37407103   | 61.874  |
| Tas2r113      | 0 | 0 | 0 | 2   | 0.033333 | 0.055124 | 0        | Unclassified | chr6:132841028-132843958  | 0.931   |
| Rhox2h        | 0 | 0 | 0 | 0   | 0        | 0.036249 | 0        | Unclassified | chrX:35083503-35089784    | 4.282   |
| Olf1460       | 0 | 0 | 0 | 1   | 0.016667 | 0.040687 | 1        | Unclassified | chr6:40519386-40522331    | 0.946   |
| Fam35a        | 0 | 0 | 0 | 662 | 11.03333 | 2.73576  | 98.66059 | Stalled      | chr14:35050220-35125689   | 73.47   |
| Tas2r104      | 0 | 0 | 0 | 0   | 0        | 0        | 0        | Unclassified | chr6:131634853-131637762  | 0.91    |
| Tas2r109      | 0 | 0 | 0 | 1   | 0.016667 | 0        | 1        | Unclassified | chr6:132930032-132932983  | 0.952   |
| Tas2r107      | 0 | 0 | 0 | 1   | 0.016667 | 0        | 0        | Unclassified | chr6:131609175-131612102  | 0.928   |
| Senp5         | 0 | 0 | 0 | 858 | 14.3     | 4.47301  | 19.4872  | Unclassified | chr16:31959755-32005373   | 43.619  |
| 4932425I24Rik | 0 | 0 | 0 | 63  | 1.05     | 0.171374 | 0.82814  | Unclassified | chr16:38297839-38343946   | 44.108  |
| Olf1316       | 0 | 0 | 0 | 0   | 0        | 0.01353  | 0        | Unclassified | chr2:111970027-111972972  | 0.946   |
| BC089491      | 0 | 0 | 0 | 12  | 0.2      | 0.189871 | 0.878565 | Unclassified | chr7:29069670-29078153    | 6.484   |
| Svs4          | 0 | 0 | 0 | 6   | 0.1      | 0.11164  | 0        | Unclassified | chr2:164101692-164106043  | 2.352   |
| Pou4f3        | 0 | 0 | 0 | 4   | 0.066667 | 0.201304 | 0.199359 | Unclassified | chr18:42552250-42555747   | 1.498   |
| Ccnjl         | 0 | 0 | 0 | 78  | 1.3      | 0.479789 | 5.192138 | Unclassified | chr11:43340285-43400499   | 58.215  |
| Pias3         | 0 | 0 | 0 | 180 | 3        | 3.46059  | 15.70755 | Stalled      | chr3:96498998-96509993    | 8.996   |
| Bcl2a1d       | 0 | 0 | 0 | 44  | 0.733333 | 45.8844  | 6.833911 | Unclassified | chr9:88618125-88628688    | 8.564   |
| 4931440F15Rik | 0 | 0 | 0 | 10  | 0.166667 | 3.86948  | 0.274924 | Unclassified | chr11:29722394-29727668   | 3.275   |
| Pde8b         | 0 | 0 | 0 | 273 | 4.55     | 0.11353  | 1.822744 | Unclassified | chr13:95794060-96022259   | 226.2   |
| Wdr41         | 0 | 0 | 0 | 327 | 5.45     | 2.84063  | 20.73327 | Stalled      | chr13:95744302-95793269   | 46.968  |
| Tprg          | 0 | 0 | 0 | 100 | 1.666667 | 0.03547  | 0.57607  | Unclassified | chr16:25284902-25422430   | 135.529 |
| Setx          | 0 | 0 | 0 | 595 | 9.916667 | 7.11616  | 40.91106 | Stalled      | chr2:28978511-29037991    | 57.481  |
| Vcp           | 0 | 0 | 0 | 706 | 11.76667 | 70.3174  | 7.000471 | Unclassified | chr4:42992835-43015379    | 20.545  |
| Car2          | 0 | 0 | 0 | 41  | 0.683333 | 8.74092  | 10.82897 | Stalled      | chr3:14884425-14900770    | 14.346  |
| Capza2        | 0 | 0 | 0 | 708 | 11.8     | 21.7815  | 15.16175 | Unclassified | chr6:17585097-17616536    | 29.44   |

|               |   |   |   |      |          |          |          |              |                           |         |
|---------------|---|---|---|------|----------|----------|----------|--------------|---------------------------|---------|
| Capza3        | 0 | 0 | 0 | 1    | 0.016667 | 0        | 1        | Unclassified | chr6:139988045-139991307  | 1.263   |
| Car1          | 0 | 0 | 0 | 25   | 0.416667 | 0.032148 | 1.282964 | Unclassified | chr3:14766213-14810365    | 42.153  |
| D5Erttd579e   | 0 | 0 | 0 | 459  | 7.65     | 2.06621  | 25.72032 | Stalled      | chr5:36943137-37089208    | 144.072 |
| Csnk1g3       | 0 | 0 | 0 | 1068 | 17.8     | 5.11315  | 26.92412 | Unclassified | chr18:54019766-54115338   | 93.573  |
| Tekt5         | 0 | 0 | 0 | 105  | 1.75     | 0.130472 | 1.812631 | Unclassified | chr16:10361346-10397541   | 34.196  |
| 2610034B18Rik | 0 | 0 | 0 | 38   | 0.633333 | 0.152575 | 0.396686 | Unclassified | chr7:87070244-87082150    | 9.907   |
| Ints2         | 0 | 0 | 0 | 669  | 11.15    | 4.73428  | 14.65907 | Unclassified | chr11:86024184-86073070   | 46.887  |
| Tspan15       | 0 | 0 | 0 | 100  | 1.666667 | 0.55806  | 6.515958 | Unclassified | chr10:61648143-61695966   | 45.824  |
| Rab4a         | 0 | 0 | 0 | 170  | 2.833333 | 1.36126  | 4.154066 | Unclassified | chr8:126327895-126359191  | 29.297  |
| Mmp20         | 0 | 0 | 0 | 40   | 0.666667 | 0.03521  | 0        | Unclassified | chr9:7626230-7674968      | 46.739  |
| Arhgef18      | 0 | 0 | 0 | 405  | 6.75     | 5.10909  | 1.376921 | Unclassified | chr8:3391007-3456600      | 63.594  |
| Sra1          | 0 | 0 | 0 | 410  | 6.833333 | 30.8063  | 9.202361 | Unclassified | chr18:36826841-36831965   | 3.125   |
| Ctso          | 0 | 0 | 0 | 241  | 4.016667 | 4.04157  | 16.9667  | Stalled      | chr3:81734537-81760647    | 24.111  |
| B230358A15Rik | 0 | 0 | 0 | 7    | 0.116667 | 0.019498 | 0.891648 | Unclassified | chrX:93502205-93554579    | 50.375  |
| Smc1a         | 0 | 0 | 0 | 863  | 14.38333 | 32.0482  | 20.28444 | Unclassified | chrX:148448970-148496515  | 45.546  |
| Erlin1        | 0 | 0 | 0 | 437  | 7.283333 | 6.05976  | 28.01198 | Unclassified | chr19:44109433-44146176   | 34.744  |
| Lingo2        | 0 | 0 | 0 | 60   | 1        | 0.046358 | 0        | Unclassified | chr4:35653896-35794445    | 138.55  |
| Spry2         | 0 | 0 | 0 | 45   | 0.75     | 0.638667 | 4.688181 | Unclassified | chr14:106291163-106298036 | 4.874   |
| Cyp2c44       | 0 | 0 | 0 | 31   | 0.516667 | 0.152575 | 0        | Unclassified | chr19:44079511-44105737   | 24.227  |
| Spry4         | 0 | 0 | 0 | 178  | 2.966667 | 0.510978 | 17.76136 | Stalled      | chr18:38745918-38762922   | 15.005  |
| Slc10a2       | 0 | 0 | 0 | 9    | 0.15     | 0        | 0        | Unclassified | chr8:5085622-5107232      | 19.611  |
| Slc12a2       | 0 | 0 | 0 | 448  | 7.466667 | 3.48123  | 36.29479 | Stalled      | chr18:58036331-58106474   | 68.144  |
| Slc10a1       | 0 | 0 | 0 | 326  | 5.433333 | 0.127164 | 0.20804  | Unclassified | chr12:82056478-82070971   | 12.494  |
| Ythdf2        | 0 | 0 | 0 | 843  | 14.05    | 8.45786  | 10.44064 | Unclassified | chr4:131740830-131770171  | 27.342  |
| Rpl24         | 0 | 0 | 0 | 438  | 7.3      | 118.447  | 2.711604 | Elongating   | chr16:55964387-55971550   | 5.164   |
| Ccdc114       | 0 | 0 | 0 | 68   | 1.133333 | 0.85686  | 1.260959 | Unclassified | chr7:53181767-53204326    | 20.56   |
| Cyp2d13       | 0 | 0 | 0 | 11   | 0.183333 | 0.052203 | 0.924384 | Unclassified | chr15:82467179-82474475   | 5.297   |
| Olfr972       | 0 | 0 | 0 | 2    | 0.033333 | 0        | 1        | Unclassified | chr9:39678861-39681806    | 0.946   |
| Haus2         | 0 | 0 | 0 | 402  | 6.7      | 4.24828  | 33.77572 | Unclassified | chr2:120433171-120446554  | 11.384  |
| Hdgfrp3       | 0 | 0 | 0 | 106  | 1.766667 | 0.320214 | 1.36301  | Unclassified | chr7:89026141-89081345    | 53.205  |
| Scmh1         | 0 | 0 | 0 | 500  | 8.333333 | 2.65868  | 9.51694  | Unclassified | chr4:120075885-120202803  | 124.919 |
| Gtse1         | 0 | 0 | 0 | 407  | 6.783333 | 16.5986  | 7.218396 | Unclassified | chr15:85688375-85707002   | 16.628  |
| Ube2d1        | 0 | 0 | 0 | 240  | 4        | 4.28823  | 14.19552 | Stalled      | chr10:70717727-70750010   | 30.284  |
| Pogk          | 0 | 0 | 0 | 255  | 4.25     | 1.88312  | 6.60909  | Unclassified | chr1:168323741-168341959  | 16.219  |
| Gmcl1         | 0 | 0 | 0 | 0    | 0        | 0        | 0        | Unclassified | chrX:30730633-30734588    | 1.956   |
| 1700008I05Rik | 0 | 0 | 0 | 16   | 0.266667 | 0        | 0        | Unclassified | chrX:132189236-132230329  | 39.094  |
| Cmtm2b        | 0 | 0 | 0 | 8    | 0.133333 | 0.037024 | 0.556246 | Unclassified | chr8:106844136-106854656  | 8.521   |
| Efcab2        | 0 | 0 | 0 | 850  | 14.16667 | 1.38869  | 138.2773 | Stalled      | chr1:180334011-180413380  | 77.37   |
| Slc44a5       | 0 | 0 | 0 | 232  | 3.866667 | 0.056322 | 2.276806 | Unclassified | chr3:153634399-153934684  | 298.286 |
| 1700067P10Rik | 0 | 0 | 0 | 2    | 0.033333 | 0.064566 | 1        | Unclassified | chr17:48224581-48227870   | 1.29    |
| Mcts1         | 0 | 0 | 0 | 221  | 3.683333 | 8.03008  | 18.26297 | Stalled      | chrX:35951834-35966699    | 12.866  |
| Wfdc15a       | 0 | 0 | 0 | 2    | 0.033333 | 0        | 1        | Unclassified | chr2:164024607-164027853  | 1.247   |
| Wdr59         | 0 | 0 | 0 | 1603 | 26.71667 | 16.3805  | 7.93575  | Unclassified | chr8:113972683-114048007  | 73.325  |
| Sox17         | 0 | 0 | 0 | 11   | 0.183333 | 0.065515 | 0.359334 | Unclassified | chr1:4481008-4488494      | 5.487   |
| AI846148      | 0 | 0 | 0 | 383  | 6.383333 | 7.86612  | 13.86685 | Unclassified | chr19:7430953-7459516     | 26.564  |
| Gm1943        | 0 | 0 | 0 | 1    | 0.016667 | 6.01429  | 0        | Unclassified | chr8:111863700-111866808  | 1.109   |
| A4gnt         | 0 | 0 | 0 | 5    | 0.083333 | 0.117044 | 0        | Unclassified | chr9:99510920-99522786    | 9.867   |
| Ccnb1         | 0 | 0 | 0 | 505  | 8.416667 | 8.48887  | 6.155633 | Unclassified | chr13:101548693-101558441 | 7.749   |
| Nlrp1b        | 0 | 0 | 0 | 96   | 1.6      | 0.094265 | 8.945507 | Unclassified | chr11:70966603-71046235   | 77.633  |
| Capn13        | 0 | 0 | 0 | 100  | 1.666667 | 0.039224 | 0.967519 | Unclassified | chr17:73655803-73750636   | 92.834  |
| Cyp1a2        | 0 | 0 | 0 | 16   | 0.266667 | 0.067724 | 0.968397 | Unclassified | chr9:57524743-57533462    | 6.72    |
| Fam59a        | 0 | 0 | 0 | 156  | 2.6      | 0.390992 | 7.839615 | Unclassified | chr18:21285842-21460640   | 172.799 |
| Sox18         | 0 | 0 | 0 | 10   | 0.166667 | 0.284983 | 0.502601 | Unclassified | chr2:181404541-181408345  | 1.805   |
| D730039F16Rik | 0 | 0 | 0 | 51   | 0.85     | 0.055434 | 2.650682 | Unclassified | chr2:34727955-34747653    | 17.699  |
| Arhgdig       | 0 | 0 | 0 | 45   | 0.75     | 0.397405 | 0.414995 | Unclassified | chr17:26336127-26340295   | 2.169   |
| Olfr732       | 0 | 0 | 0 | 0    | 0        | 0.041477 | 0        | Unclassified | chr14:50900999-50903926   | 0.928   |
| Neur1a        | 0 | 0 | 0 | 197  | 3.283333 | 0.329803 | 1.482045 | Unclassified | chr19:47251309-47333930   | 80.622  |
| Nf2           | 0 | 0 | 0 | 706  | 11.76667 | 12.8225  | 20.96486 | Unclassified | chr11:4665850-4751530     | 83.681  |
| Neurog1       | 0 | 0 | 0 | 10   | 0.166667 | 0.169345 | 1.59904  | Unclassified | chr13:56351859-56355524   | 1.666   |
| Olfr444       | 0 | 0 | 0 | 1    | 0.016667 | 0.016562 | 1        | Unclassified | chr6:42903498-42906431    | 0.934   |
| Olfr1131      | 0 | 0 | 0 | 1    | 0.016667 | 0        | 1        | Unclassified | chr2:87466621-87469551    | 0.931   |
| Olfr1135      | 0 | 0 | 0 | 1    | 0.016667 | 0.027473 | 0        | Unclassified | chr2:87511589-87514522    | 0.934   |
| Olfr1112      | 0 | 0 | 0 | 0    | 0        | 0.053569 | 0        | Unclassified | chr2:87029845-87032802    | 0.958   |
| Olfr365       | 0 | 0 | 0 | 0    | 0        | 0.034041 | 0        | Unclassified | chr2:37054762-37057701    | 0.94    |
| Olfr733       | 0 | 0 | 0 | 0    | 0        | 0.051575 | 0        | Unclassified | chr14:50918011-50921005   | 0.995   |
| Rasgrf1       | 0 | 0 | 0 | 179  | 2.983333 | 0.699329 | 4.147163 | Unclassified | chr9:89802612-89921817    | 117.206 |
| Mup5          | 0 | 0 | 0 | 6    | 0.1      | 0.073488 | 0.834329 | Unclassified | chr4:61492352-61498214    | 3.863   |
| Mup1          | 0 | 0 | 0 | 0    | 0        | 0        | 0        | Unclassified | chr4:60510886-60516832    | 3.947   |
| Mup4          | 0 | 0 | 0 | 4    | 0.066667 | 0.058589 | 0.588562 | Unclassified | chr4:59969677-59975537    | 3.861   |
| Mup3          | 0 | 0 | 0 | 6    | 0.1      | 0        | 0.972075 | Unclassified | chr4:61744510-61750346    | 3.837   |
| Subgcp4       | 0 | 0 | 0 | 617  | 10.28333 | 8.81448  | 29.30914 | Unclassified | chr2:120994941-121022854  | 25.914  |
| Mier3         | 0 | 0 | 0 | 334  | 5.566667 | 0.89966  | 13.99837 | Unclassified | chr13:112474385-112508802 | 32.418  |
| Kcnc2         | 0 | 0 | 0 | 104  | 1.733333 | 0.033096 | 1.320151 | Unclassified | chr10:111706178-111903360 | 195.183 |
| Fam170a       | 0 | 0 | 0 | 5    | 0.083333 | 0.0191   | 1.098016 | Unclassified | chr18:50436022-50442673   | 4.652   |
| 1200014J11Rik | 0 | 0 | 0 | 500  | 8.333333 | 5.82412  | 13.78311 | Unclassified | chr11:72859368-72897081   | 35.714  |
| Olfr382       | 0 | 0 | 0 | 1    | 0.016667 | 0.027298 | 0        | Unclassified | chr11:73329760-73332699   | 0.94    |
| V1rd13        | 0 | 0 | 0 | 0    | 0        | 0        | 0        | Unclassified | chr7:24676547-24679462    | 0.916   |
| Olfr450       | 0 | 0 | 0 | 2    | 0.033333 | 0.08242  | 2        | Unclassified | chr6:42765471-42768404    | 0.934   |
| Cpne8         | 0 | 0 | 0 | 112  | 1.866667 | 0.159297 | 2.589395 | Unclassified | chr15:90317911-90511819   | 191.909 |
| Olfr919       | 0 | 0 | 0 | 1    | 0.016667 | 0.013487 | 0        | Unclassified | chr9:38505013-38507961    | 0.949   |
| 1200009O22Rik | 0 | 0 | 0 | 11   | 0.183333 | 0.149501 | 2.085666 | Unclassified | chr6:53765462-53772819    | 5.358   |
| 5430437P03Rik | 0 | 0 | 0 | 426  | 7.1      | 42.584   | 3.980938 | Unclassified | chr8:73918753-73928671    | 7.919   |
| Rps6ka3       | 0 | 0 | 0 | 312  | 5.2      | 2.24525  | 35.03733 | Stalled      | chrX:155692051-155801417  | 107.367 |
| Olfr1309      | 0 | 0 | 0 | 1    | 0.016667 | 0        | 1        | Unclassified | chr2:111823290-111826253  | 0.964   |
| Defa5         | 0 | 0 | 0 | 0    | 0        | 0.012522 | 0        | Unclassified | chr8:22435072-22438054    | 0.983   |
| Gabarapl2     | 0 | 0 | 0 | 291  | 4.85     | 10.4461  | 3.66023  | Unclassified | chr8:114462617-114476480  | 11.864  |

|               |   |   |   |      |          |          |          |              |                          |         |
|---------------|---|---|---|------|----------|----------|----------|--------------|--------------------------|---------|
| Mospd3        | 0 | 0 | 0 | 498  | 8.3      | 19.7866  | 4.130897 | Unclassified | chr5:138037874-138044268 | 4.395   |
| Pard6g        | 0 | 0 | 0 | 273  | 4.55     | 2.11204  | 6.926567 | Unclassified | chr18:80241633-80316379  | 72.747  |
| Aff4          | 0 | 0 | 0 | 1275 | 21.25    | 6.09212  | 19.76066 | Unclassified | chr11:53162268-53235332  | 71.065  |
| Wnt16         | 0 | 0 | 0 | 79   | 1.316667 | 0.545767 | 0.228717 | Unclassified | chr6:22236226-22248522   | 10.297  |
| Mpv17l        | 0 | 0 | 0 | 24   | 0.4      | 0.371253 | 3.037138 | Unclassified | chr16:13938787-13949450  | 8.664   |
| Acox2         | 0 | 0 | 0 | 50   | 0.833333 | 0        | 0.408872 | Unclassified | chr14:9058025-9093533    | 33.509  |
| Mrs2          | 0 | 0 | 0 | 400  | 6.666667 | 7.6828   | 39.10467 | Stalled      | chr13:25084351-25114248  | 27.898  |
| Htt           | 0 | 0 | 0 | 1337 | 22.28333 | 7.02804  | 34.28394 | Unclassified | chr5:35102388-35252045   | 147.658 |
| Hsd11b1       | 0 | 0 | 0 | 186  | 3.1      | 1.46873  | 2.339256 | Unclassified | chr1:195047834-195092239 | 42.406  |
| 9530068E07Rik | 0 | 0 | 0 | 373  | 6.216667 | 26.5474  | 10.44826 | Unclassified | chr11:52207929-52222225  | 12.297  |
| Hdgfrp2       | 0 | 0 | 0 | 491  | 8.183333 | 39.0469  | 13.23076 | Unclassified | chr17:56217079-56240019  | 20.941  |
| Hdgff1        | 0 | 0 | 0 | 6    | 0.1      | 0.173541 | 0.997494 | Unclassified | chr13:26860040-26864034  | 1.995   |
| Hebp1         | 0 | 0 | 0 | 65   | 1.083333 | 1.58208  | 6.582518 | Unclassified | chr6:135087536-135120233 | 30.698  |
| Serpinb1c     | 0 | 0 | 0 | 13   | 0.216667 | 0.119451 | 0.663087 | Unclassified | chr13:32973265-32992009  | 16.745  |
| Snap29        | 0 | 0 | 0 | 506  | 8.433333 | 9.75504  | 18.63301 | Unclassified | chr16:17404092-17430919  | 24.828  |
| Slc47a1       | 0 | 0 | 0 | 56   | 0.933333 | 0.053523 | 0        | Unclassified | chr11:61156901-61193577  | 34.677  |
| Mtfr1         | 0 | 0 | 0 | 464  | 7.733333 | 4.35083  | 18.2235  | Unclassified | chr3:19086243-19120805   | 32.563  |
| Wscd1         | 0 | 0 | 0 | 46   | 0.766667 | 0        | 0.468775 | Unclassified | chr11:71562204-71603148  | 38.945  |
| Abcg8         | 0 | 0 | 0 | 49   | 0.816667 | 0.049064 | 1.1136   | Unclassified | chr17:85080470-85099673  | 17.204  |
| Ifit80        | 0 | 0 | 0 | 681  | 11.35    | 3.01953  | 52.31498 | Stalled      | chr3:68696432-68810492   | 112.061 |
| Nkapl         | 0 | 0 | 0 | 47   | 0.783333 | 4.06022  | 14.09341 | Unclassified | chr13:21558915-21562370  | 1.456   |
| Rbm4b         | 0 | 0 | 0 | 598  | 9.966667 | 6.27652  | 8.286742 | Unclassified | chr19:4754524-4765940    | 9.417   |
| Dnase1l2      | 0 | 0 | 0 | 84   | 1.4      | 0.92257  | 1.672326 | Elongating   | chr17:24577712-24582046  | 2.335   |
| Paox          | 0 | 0 | 0 | 151  | 2.516667 | 4.10854  | 25.32378 | Stalled      | chr7:147309583-147320233 | 8.651   |
| Vps24         | 0 | 0 | 0 | 514  | 8.566667 | 9.11296  | 24.20332 | Unclassified | chr6:71491847-71531568   | 37.722  |
| Cpa5          | 0 | 0 | 0 | 31   | 0.516667 | 0.058761 | 0        | Unclassified | chr6:30559009-30581521   | 20.513  |
| Krtap3-2      | 0 | 0 | 0 | 1    | 0.016667 | 0        | 0        | Unclassified | chr11:99417136-99420167  | 1.032   |
| Sema3a        | 0 | 0 | 0 | 76   | 1.266667 | 0.168409 | 0.7295   | Unclassified | chr5:13397308-13602571   | 203.264 |
| Try4          | 0 | 0 | 0 | 4    | 0.066667 | 0        | 1.061694 | Unclassified | chr6:41250270-41255532   | 3.263   |
| Rhou          | 0 | 0 | 0 | 19   | 0.316667 | 0.07983  | 2.991028 | Unclassified | chr8:126175828-126187780 | 9.953   |
| Txndc8        | 0 | 0 | 0 | 31   | 0.516667 | 0.041477 | 0        | Unclassified | chr4:57996900-58023996   | 25.097  |
| Cpne1         | 0 | 0 | 0 | 1048 | 17.46667 | 20.4012  | 13.7156  | Unclassified | chr2:155897580-155939700 | 40.121  |
| Enox1         | 0 | 0 | 0 | 443  | 7.383333 | 0.103726 | 2.250786 | Unclassified | chr14:77554622-78121214  | 564.593 |
| Foxq1         | 0 | 0 | 0 | 10   | 0.166667 | 0.963826 | 0.933173 | Unclassified | chr13:31648038-31652843  | 2.806   |
| Gm347         | 0 | 0 | 0 | 22   | 0.366667 | 0.240191 | 0.638728 | Unclassified | chr2:28301460-28311028   | 7.569   |
| Dcun1d5       | 0 | 0 | 0 | 435  | 7.25     | 30.8266  | 35.7188  | Unclassified | chr9:7182565-7207031     | 22.467  |
| Foxd1         | 0 | 0 | 0 | 7    | 0.116667 | 0.39407  | 2.969131 | Unclassified | chr13:99122199-99126660  | 2.462   |
| Foxg1         | 0 | 0 | 0 | 8    | 0.133333 | 0.11581  | 0        | Unclassified | chr12:50481869-50487853  | 3.985   |
| Slc25a33      | 0 | 0 | 0 | 537  | 8.95     | 4.66302  | 17.33697 | Unclassified | chr4:149118144-149150376 | 30.233  |
| Tipin         | 0 | 0 | 0 | 835  | 13.91667 | 25.618   | 19.73593 | Unclassified | chr9:64127413-64152599   | 23.187  |
| Sunc1         | 0 | 0 | 0 | 34   | 0.566667 | 0.01866  | 1.572343 | Unclassified | chr11:8916056-8950994    | 32.939  |
| Itch          | 0 | 0 | 0 | 761  | 12.68333 | 4.80761  | 25.70805 | Unclassified | chr2:154957216-155052590 | 93.375  |
| Pdgcfc        | 0 | 0 | 0 | 106  | 1.766667 | 0.605682 | 3.858836 | Unclassified | chr3:80838337-81017953   | 177.617 |
| Clec4a3       | 0 | 0 | 0 | 11   | 0.183333 | 0.236609 | 3.058026 | Unclassified | chr6:122900661-122919892 | 17.232  |
| Olfr1087      | 0 | 0 | 0 | 0    | 0        | 0        | 0        | Unclassified | chr2:86530188-86533130   | 0.943   |
| Pou3f2        | 0 | 0 | 0 | 5    | 0.083333 | 0.383149 | 0.144934 | Unclassified | chr4:22413940-22417278   | 1.339   |
| Kif13b        | 0 | 0 | 0 | 716  | 11.93333 | 2.14317  | 15.94225 | Stalled      | chr14:65269367-65425133  | 153.767 |
| Ssxb8         | 0 | 0 | 0 | 1    | 0.016667 | 0        | 0        | Unclassified | chrX:8262457-8269970     | 5.514   |
| Poir2e        | 0 | 0 | 0 | 236  | 3.933333 | 62.1797  | 4.423391 | Unclassified | chr10:79498697-79504404  | 3.708   |
| Tmc5          | 0 | 0 | 0 | 88   | 1.466667 | 0.101879 | 0.955159 | Unclassified | chr7:125738810-125818599 | 77.79   |
| Kif12         | 0 | 0 | 0 | 11   | 0.183333 | 0.017088 | 0.354672 | Unclassified | chr4:62826670-62835165   | 6.496   |
| Kif13a        | 0 | 0 | 0 | 346  | 5.766667 | 0.532017 | 10.70486 | Stalled      | chr13:46844456-47027087  | 180.632 |
| Ppapdc3       | 0 | 0 | 0 | 39   | 0.65     | 0.28106  | 1.201671 | Unclassified | chr2:31949170-31966340   | 15.171  |
| Olfr1090      | 0 | 0 | 0 | 0    | 0        | 0.040816 | 0        | Unclassified | chr2:86593951-86596893   | 0.943   |
| Chat          | 0 | 0 | 0 | 71   | 1.183333 | 0.050171 | 0.909452 | Unclassified | chr14:33221388-33281095  | 57.708  |
| Cga           | 0 | 0 | 0 | 13   | 0.216667 | 0.092738 | 0        | Unclassified | chr4:34839027-34854623   | 13.597  |
| Olfr74        | 0 | 0 | 0 | 1    | 0.016667 | 0        | 1        | Unclassified | chr2:87813863-87816820   | 0.958   |
| Olfr73        | 0 | 0 | 0 | 0    | 0        | 0.054422 | 0        | Unclassified | chr2:87874352-87877294   | 0.943   |
| Gfi1b         | 0 | 0 | 0 | 47   | 0.783333 | 0.850605 | 4.190227 | Unclassified | chr2:28464970-28479502   | 12.533  |
| Olfr1157      | 0 | 0 | 0 | 1    | 0.016667 | 0.054596 | 1        | Unclassified | chr2:87802108-87805047   | 0.94    |
| Chd1          | 0 | 0 | 0 | 1065 | 17.75    | 8.07331  | 17.03468 | Unclassified | chr17:15839930-15909576  | 67.647  |
| Dnajc6        | 0 | 0 | 0 | 146  | 2.433333 | 0.111936 | 0.501983 | Unclassified | chr4:101167252-101315398 | 146.147 |
| Rnf138        | 0 | 0 | 0 | 509  | 8.483333 | 4.66634  | 25.51965 | Unclassified | chr18:21157841-21186724  | 26.884  |
| Slc22a21      | 0 | 0 | 0 | 75   | 1.25     | 2.0854   | 14.27444 | Stalled      | chr11:53764325-53795529  | 29.205  |
| Urb2          | 0 | 0 | 0 | 338  | 5.633333 | 5.19128  | 0.789066 | Unclassified | chr8:126545372-126572404 | 25.033  |
| C430004E15Rik | 0 | 0 | 0 | 339  | 5.65     | 8.61953  | 9.489334 | Unclassified | chr2:25116117-25125406   | 7.29    |
| Gm11938       | 0 | 0 | 0 | 0    | 0        | 0        | 0        | Unclassified | chr11:99463959-99466622  | 0.664   |
| Kcnv2         | 0 | 0 | 0 | 25   | 0.416667 | 0.030293 | 0.370932 | Unclassified | chr19:27395108-27411669  | 14.562  |
| Olfr984       | 0 | 0 | 0 | 0    | 0        | 0.067811 | 0        | Unclassified | chr9:39908128-39911073   | 0.946   |
| Defb4         | 0 | 0 | 0 | 2    | 0.033333 | 0.146955 | 0.648011 | Unclassified | chr8:19196705-19201545   | 2.841   |
| Pqbp1         | 0 | 0 | 0 | 296  | 4.933333 | 58.0698  | 12.61559 | Unclassified | chrX:7471648-7478354     | 4.707   |
| Rspo4         | 0 | 0 | 0 | 53   | 0.883333 | 0.108109 | 1.142254 | Unclassified | chr2:151666662-151700404 | 31.743  |
| C8b           | 0 | 0 | 0 | 35   | 0.583333 | 0.054793 | 1.060271 | Unclassified | chr4:104436921-104477153 | 38.233  |
| Xlr5a         | 0 | 0 | 0 | 0    | 0        | 0        | 0        | Unclassified | chrX:70352974-70365041   | 10.068  |
| Xlr3b         | 0 | 0 | 0 | 1    | 0.016667 | 0.377727 | 1        | Unclassified | chrX:70435517-70448269   | 10.753  |
| Htr2a         | 0 | 0 | 0 | 61   | 1.016667 | 1.40582  | 0        | Unclassified | chr14:75038646-75106666  | 66.021  |
| Lig3          | 0 | 0 | 0 | 658  | 10.96667 | 4.56541  | 15.59884 | Unclassified | chr11:82592636-82617776  | 23.141  |
| Lifr          | 0 | 0 | 0 | 1388 | 23.13333 | 5.38233  | 6.373635 | Unclassified | chr15:7077571-7147489    | 67.919  |
| Ins1          | 0 | 0 | 0 | 0    | 0        | 0.037769 | 0        | Unclassified | chr19:52336812-52339948  | 1.137   |
| Tmx2          | 0 | 0 | 0 | 230  | 3.833333 | 10.3265  | 14.67077 | Unclassified | chr2:84511473-84520204   | 6.732   |
| Lipa          | 0 | 0 | 0 | 252  | 4.2      | 6.40284  | 17.99262 | Stalled      | chr19:34566805-34603964  | 35.16   |
| Mat2b         | 0 | 0 | 0 | 400  | 6.666667 | 18.0894  | 18.05419 | Unclassified | chr11:40492815-40508115  | 13.301  |
| Pr17b1        | 0 | 0 | 0 | 3    | 0.05     | 0        | 0        | Unclassified | chr13:27693687-27704451  | 8.765   |
| Trim33        | 0 | 0 | 0 | 776  | 12.93333 | 4.19894  | 56.90912 | Unclassified | chr3:103081215-103162691 | 79.477  |
| Dusp9         | 0 | 0 | 0 | 8    | 0.133333 | 0.578822 | 1.303887 | Unclassified | chrX:70882779-70888853   | 4.075   |
| 1700013G24Rik | 0 | 0 | 0 | 7    | 0.116667 | 0        | 0.560115 | Unclassified | chr4:137007210-137011376 | 2.167   |



|               |   |   |   |      |          |          |          |              |                           |         |
|---------------|---|---|---|------|----------|----------|----------|--------------|---------------------------|---------|
| Pla2g5        | 0 | 0 | 0 | 94   | 1.566667 | 0.048069 | 1.229847 | Unclassified | chr4:138355161-138421384  | 64.224  |
| Pcdh1         | 0 | 0 | 0 | 16   | 0.266667 | 0.052553 | 0.462984 | Unclassified | chr18:38356347-38371416   | 13.07   |
| Hspb8         | 0 | 0 | 0 | 20   | 0.333333 | 0        | 0.426222 | Unclassified | chr5:116858503-116874873  | 14.371  |
| Olf1039       | 0 | 0 | 0 | 1    | 0.016667 | 0        | 0        | Unclassified | chr2:85970858-85973818    | 0.961   |
| Olf1307       | 0 | 0 | 0 | 2    | 0.033333 | 0.047723 | 0        | Unclassified | chr2:111784672-111787611  | 0.94    |
| Rnf170        | 0 | 0 | 0 | 435  | 7.25     | 1.42425  | 74.37522 | Stalled      | chr8:27227851-27254341    | 24.491  |
| Zar1          | 0 | 0 | 0 | 7    | 0.116667 | 0        | 0        | Unclassified | chr5:151309645-151322734  | 11.09   |
| Olf301        | 0 | 0 | 0 | 1    | 0.016667 | 0        | 1        | Unclassified | chr7:93558873-93561809    | 0.937   |
| Olf144        | 0 | 0 | 0 | 2    | 0.033333 | 0.050209 | 2        | Unclassified | chr9:39045071-39048016    | 0.946   |
| Adamts1       | 0 | 0 | 0 | 238  | 3.966667 | 0.044144 | 0        | Unclassified | chr4:85697818-86074286    | 374.469 |
| Med25         | 0 | 0 | 0 | 365  | 6.083333 | 19.1366  | 9.88604  | Unclassified | chr7:52134755-52149736    | 12.982  |
| Slco4c1       | 0 | 0 | 0 | 20   | 0.333333 | 0.299797 | 1.488556 | Unclassified | chr1:98715360-98770748    | 53.389  |
| Cchr1         | 0 | 0 | 0 | 207  | 3.45     | 6.26048  | 14.7614  | Stalled      | chr17:35652060-35667960   | 13.901  |
| Tusc3         | 0 | 0 | 0 | 446  | 7.433333 | 8.46068  | 39.20724 | Stalled      | chr8:40066920-40250468    | 181.549 |
| Tnni3         | 0 | 0 | 0 | 17   | 0.283333 | 1.29096  | 0.516932 | Unclassified | chr7:4469909-4476045      | 4.137   |
| Tnni2         | 0 | 0 | 0 | 53   | 0.883333 | 3.55422  | 8.343488 | Unclassified | chr7:149626372-149630310  | 1.939   |
| Tnfrsf9       | 0 | 0 | 0 | 101  | 1.683333 | 11.9593  | 6.524132 | Unclassified | chr17:57242807-57247180   | 2.374   |
| Slc7a12       | 0 | 0 | 0 | 11   | 0.183333 | 0        | 0.706925 | Unclassified | chr3:14478698-14505818    | 25.121  |
| Tnp1          | 0 | 0 | 0 | 1    | 0.016667 | 0        | 1        | Unclassified | chr1:73061648-73064473    | 0.826   |
| Tnp2          | 0 | 0 | 0 | 60   | 1        | 8.73776  | 53       | Unclassified | chr16:10788027-10790748   | 0.722   |
| Msh2          | 0 | 0 | 0 | 585  | 9.75     | 13.4978  | 27.73089 | Unclassified | chr17:88069896-88123053   | 51.158  |
| BC048507      | 0 | 0 | 0 | 2    | 0.033333 | 17.4686  | 1        | Unclassified | chr13:67962273-67964854   | 0.582   |
| Msc           | 0 | 0 | 0 | 11   | 0.183333 | 0.239138 | 0.563805 | Unclassified | chr1:14743428-14748047    | 2.62    |
| Rims4         | 0 | 0 | 0 | 84   | 1.4      | 0.077021 | 0.396189 | Unclassified | chr2:163689616-163746419  | 54.804  |
| Fstl4         | 0 | 0 | 0 | 522  | 8.7      | 0.09457  | 0.8965   | Unclassified | chr11:52576207-53000849   | 422.643 |
| Crispld1      | 0 | 0 | 0 | 20   | 0.333333 | 0.035192 | 2.069207 | Unclassified | chr1:17715497-17756288    | 38.792  |
| Ebp           | 0 | 0 | 0 | 208  | 3.466667 | 22.3525  | 7.304796 | Unclassified | chrX:7762456-7772638      | 8.183   |
| Ebf3          | 0 | 0 | 0 | 136  | 2.266667 | 0.151282 | 0.471975 | Unclassified | chr7:144385353-144508128  | 120.776 |
| Ebf2          | 0 | 0 | 0 | 179  | 2.983333 | 0.100358 | 2.666975 | Unclassified | chr14:67850128-68048604   | 196.477 |
| Lefty1        | 0 | 0 | 0 | 17   | 0.283333 | 1.23359  | 0.144463 | Unclassified | chr1:182863169-182868532  | 3.364   |
| Samd7         | 0 | 0 | 0 | 24   | 0.4      | 0.213675 | 1.993781 | Unclassified | chr3:30643214-30666089    | 20.876  |
| Gps1          | 0 | 0 | 0 | 393  | 6.55     | 13.429   | 2.302052 | Elongating   | chr11:120643828-120650416 | 4.589   |
| Pdgfrl        | 0 | 0 | 0 | 52   | 0.866667 | 0.108684 | 0.564595 | Unclassified | chr8:42009586-42076124    | 64.539  |
| Ecel1         | 0 | 0 | 0 | 16   | 0.266667 | 0.166261 | 0.73374  | Unclassified | chr1:89044229-89053602    | 7.374   |
| Ank3          | 0 | 0 | 0 | 440  | 7.333333 | 0.136959 | 1.059942 | Unclassified | chr10:68994455-69490184   | 493.73  |
| Dbpht2        | 0 | 0 | 0 | 4    | 0.066667 | 0.051351 | 0.39952  | Unclassified | chr12:75396460-75401455   | 2.996   |
| Ang2          | 0 | 0 | 0 | 2    | 0.033333 | 0        | 1        | Unclassified | chr14:51815160-51817598   | 0.439   |
| Ang3          | 0 | 0 | 0 | 2    | 0.033333 | 0.072409 | 0        | Unclassified | chr14:44532733-44540744   | 6.012   |
| Slc25a4       | 0 | 0 | 0 | 445  | 7.416667 | 116.265  | 11.03807 | Unclassified | chr8:47292697-47298363    | 3.667   |
| Pygo1         | 0 | 0 | 0 | 14   | 0.233333 | 0.058757 | 1.234865 | Unclassified | chr9:72771456-72793822    | 20.367  |
| Pla2g4e       | 0 | 0 | 0 | 106  | 1.766667 | 0.108783 | 0.856672 | Unclassified | chr2:119992147-120073071  | 78.925  |
| Jazf1         | 0 | 0 | 0 | 698  | 11.63333 | 0.214701 | 3.967421 | Unclassified | chr6:52718061-53020618    | 300.558 |
| Ctdspl2       | 0 | 0 | 0 | 819  | 13.65    | 3.43878  | 32.80765 | Unclassified | chr2:121780188-121839322  | 57.135  |
| Lcmt2         | 0 | 0 | 0 | 592  | 9.866667 | 10.843   | 13.00311 | Unclassified | chr2:120963027-120968434  | 3.408   |
| Mecom         | 0 | 0 | 0 | 409  | 6.816667 | 0        | 1.160578 | Unclassified | chr3:29850225-30410409    | 558.185 |
| Mpz12         | 0 | 0 | 0 | 67   | 1.116667 | 0.721317 | 4.262363 | Unclassified | chr9:44848426-44862126    | 11.701  |
| Tollip        | 0 | 0 | 0 | 692  | 11.53333 | 8.85458  | 21.12818 | Unclassified | chr7:149067489-149090311  | 20.823  |
| Muc13         | 0 | 0 | 0 | 44   | 0.733333 | 0.017267 | 1.168785 | Unclassified | chr16:33792122-33820013   | 25.892  |
| Tm9sf2        | 0 | 0 | 0 | 1292 | 21.53333 | 14.952   | 18.76961 | Unclassified | chr14:122504303-122558825 | 52.523  |
| Suz12         | 0 | 0 | 0 | 1274 | 21.23333 | 18.6652  | 23.1761  | Unclassified | chr11:79804607-79847624   | 41.018  |
| Emr4          | 0 | 0 | 0 | 55   | 0.916667 | 0.051398 | 1.319116 | Unclassified | chr17:55887248-55992927   | 103.68  |
| Akirin1       | 0 | 0 | 0 | 382  | 6.366667 | 12.4725  | 15.45156 | Unclassified | chr4:123412437-123429542  | 15.106  |
| Serpina12     | 0 | 0 | 0 | 27   | 0.45     | 0.052099 | 0.369896 | Unclassified | chr12:105266978-105284653 | 15.676  |
| Atp5s         | 0 | 0 | 0 | 358  | 5.966667 | 1.28595  | 74.84477 | Stalled      | chr12:70823948-70845645   | 19.698  |
| Iqcd          | 0 | 0 | 0 | 150  | 2.5      | 0.322713 | 13.30163 | Stalled      | chr5:121037031-121057122  | 18.092  |
| Slmo2         | 0 | 0 | 0 | 674  | 11.23333 | 30.7062  | 9.814163 | Unclassified | chr2:174290591-174300442  | 7.852   |
| Fem1b         | 0 | 0 | 0 | 794  | 13.23333 | 9.65376  | 20.21355 | Unclassified | chr9:62639635-62661455    | 19.821  |
| Zfp454        | 0 | 0 | 0 | 17   | 0.283333 | 0.093504 | 1.540528 | Unclassified | chr11:50686224-50702945   | 14.722  |
| Tssc1         | 0 | 0 | 0 | 874  | 14.56667 | 15.4899  | 21.96296 | Unclassified | chr12:29434692-29552355   | 115.664 |
| Btnl9         | 0 | 0 | 0 | 30   | 0.5      | 0.286195 | 0.388192 | Unclassified | chr11:48981826-49002591   | 18.766  |
| Gm889         | 0 | 0 | 0 | 137  | 2.283333 | 0.12679  | 15.62548 | Stalled      | chr12:40902972-40927902   | 22.931  |
| Mpp4          | 0 | 0 | 0 | 70   | 1.166667 | 0        | 2.413483 | Unclassified | chr1:59177778-59220480    | 40.703  |
| Ism1          | 0 | 0 | 0 | 66   | 1.1      | 0.191548 | 2.294859 | Unclassified | chr2:139501913-139584317  | 80.405  |
| Gm5647        | 0 | 0 | 0 | 0    | 0        | 0.020222 | 0        | Unclassified | chrX:151009770-151015873  | 4.104   |
| Tmem27        | 0 | 0 | 0 | 15   | 0.25     | 0        | 0        | Unclassified | chrX:160526118-160556791  | 28.674  |
| 2310030G06Rik | 0 | 0 | 0 | 10   | 0.166667 | 0.123829 | 0.454489 | Unclassified | chr9:50547795-50556626    | 6.832   |
| Cntn6         | 0 | 0 | 0 | 149  | 2.483333 | 0.021486 | 1.433409 | Unclassified | chr6:104441037-104813399  | 370.363 |
| Psors1c2      | 0 | 0 | 0 | 7    | 0.116667 | 0.13264  | 2        | Unclassified | chr17:35668213-35671590   | 1.378   |
| Caprin1       | 0 | 0 | 0 | 1733 | 28.88333 | 44.9919  | 10.33703 | Unclassified | chr2:103603101-103639797  | 34.697  |
| Pde3a         | 0 | 0 | 0 | 160  | 2.666667 | 0.033527 | 0        | Unclassified | chr6:141195789-141447872  | 250.084 |
| Tbc1d8        | 0 | 0 | 0 | 756  | 12.6     | 0.915544 | 1.12203  | Unclassified | chr1:39428343-39537592    | 107.25  |
| Sfrp5         | 0 | 0 | 0 | 14   | 0.233333 | 0.074278 | 0.534321 | Unclassified | chr19:42272462-42278742   | 4.281   |
| Npff          | 0 | 0 | 0 | 109  | 1.816667 | 1.43681  | 46       | Unclassified | chr15:102354269-102357052 | 0.784   |
| Gtpbp1        | 0 | 0 | 0 | 691  | 11.51667 | 23.4707  | 7.455451 | Unclassified | chr15:79519325-79551909   | 30.585  |
| Stk38l        | 0 | 0 | 0 | 359  | 5.983333 | 0.770439 | 29.35583 | Stalled      | chr6:146671529-146727328  | 53.8    |
| Fam110c       | 0 | 0 | 0 | 5    | 0.083333 | 0.40944  | 0.623777 | Unclassified | chr12:31756832-31764805   | 5.974   |
| Serpina5      | 0 | 0 | 0 | 8    | 0.133333 | 0.011856 | 1.003239 | Unclassified | chr12:105337322-105344347 | 5.026   |
| Obox5         | 0 | 0 | 0 | 1    | 0.016667 | 0.013787 | 0        | Unclassified | chr7:16333718-16344623    | 8.906   |
| Smyd5         | 0 | 0 | 0 | 608  | 10.13333 | 16.2235  | 3.876992 | Unclassified | chr6:85379969-85396423    | 14.455  |
| Slc38a11      | 0 | 0 | 0 | 95   | 1.583333 | 0.135665 | 0.332831 | Unclassified | chr2:65154689-65204083    | 47.395  |
| Myl3          | 0 | 0 | 0 | 14   | 0.233333 | 0        | 0.780023 | Unclassified | chr9:110664184-110672298  | 6.115   |
| Olf649        | 0 | 0 | 0 | 7    | 0.116667 | 0.027298 | 3        | Unclassified | chr7:111337780-111340719  | 0.94    |
| Klhl5         | 0 | 0 | 0 | 136  | 2.266667 | 9.81062  | 1.306616 | Unclassified | chr5:65520469-65559381    | 36.913  |
| Gmeb1         | 0 | 0 | 0 | 760  | 12.66667 | 3.25096  | 12.74253 | Unclassified | chr4:131776939-131819464  | 40.526  |
| Foxred2       | 0 | 0 | 0 | 343  | 5.716667 | 3.82158  | 13.27273 | Unclassified | chr15:77770953-77789152   | 16.2    |
| Mmp24         | 0 | 0 | 0 | 272  | 4.533333 | 0.075192 | 0.136875 | Unclassified | chr2:155599079-155644102  | 43.024  |

|               |   |   |   |      |           |          |          |              |                           |         |
|---------------|---|---|---|------|-----------|----------|----------|--------------|---------------------------|---------|
| Kirrel        | 0 | 0 | 0 | 140  | 2.333333  | 0.018973 | 1.229646 | Unclassified | chr3:86882513-86980669    | 96.157  |
| Mmp2          | 0 | 0 | 0 | 28   | 0.466667  | 0.143293 | 0        | Unclassified | chr8:95349226-95377319    | 26.094  |
| Ctndd1        | 0 | 0 | 0 | 202  | 3.366667  | 1.38365  | 5.735179 | Unclassified | chr2:84440937-84492897    | 49.961  |
| Arl9          | 0 | 0 | 0 | 31   | 0.516667  | 0.127844 | 1.516255 | Unclassified | chr5:77431079-77438502    | 5.424   |
| V1rh4         | 0 | 0 | 0 | 2    | 0.033333  | 0.034799 | 1        | Unclassified | chr13:22472406-22475510   | 1.105   |
| V1rh3         | 0 | 0 | 0 | 2    | 0.033333  | 0.04769  | 0        | Unclassified | chr13:22484897-22487836   | 0.94    |
| Scamp1        | 0 | 0 | 0 | 108  | 1.8       | 0.241106 | 5.124262 | Unclassified | chr13:94971387-95057236   | 83.85   |
| V1rg8         | 0 | 0 | 0 | 1    | 0.016667  | 0        | 0        | Unclassified | chr7:12906556-12909477    | 0.922   |
| Fam108a       | 0 | 0 | 0 | 259  | 4.316667  | 44.1469  | 4.649046 | Unclassified | chr10:80046398-80055049   | 6.652   |
| V1rg6         | 0 | 0 | 0 | 2    | 0.033333  | 0.041883 | 1        | Unclassified | chr7:12463691-12466609    | 0.919   |
| V1rg5         | 0 | 0 | 0 | 0    | 0         | 0        | 0        | Unclassified | chr7:12430123-12433038    | 0.916   |
| Ccdc53        | 0 | 0 | 0 | 305  | 5.083333  | 14.5301  | 32.1806  | Stalled      | chr10:87661841-87708903   | 45.063  |
| V1rh6         | 0 | 0 | 0 | 0    | 0         | 0.044386 | 0        | Unclassified | chr13:23101117-23104272   | 1.156   |
| V1rh5         | 0 | 0 | 0 | 1    | 0.016667  | 0.034827 | 0        | Unclassified | chr13:23124206-23127310   | 1.105   |
| Ankrd40       | 0 | 0 | 0 | 307  | 5.116667  | 24.7788  | 12.01475 | Unclassified | chr11:94187314-94203161   | 13.848  |
| Clec4b2       | 0 | 0 | 0 | 20   | 0.333333  | 0        | 0.643232 | Unclassified | chr6:123121040-123154689  | 31.65   |
| Nucb1         | 0 | 0 | 0 | 439  | 7.316667  | 53.0882  | 7.518419 | Unclassified | chr7:52748043-52767778    | 17.736  |
| Numb          | 0 | 0 | 0 | 164  | 2.733333  | 2.92192  | 1.131213 | Unclassified | chr12:85136388-85185293   | 46.906  |
| Hey1          | 0 | 0 | 0 | 21   | 0.35      | 2.05129  | 1.836144 | Unclassified | chr3:8663358-8669038      | 3.681   |
| 1700034E13Rik | 0 | 0 | 0 | 8    | 0.133333  | 0        | 0        | Unclassified | chr18:52803873-52823385   | 17.513  |
| Bcor          | 0 | 0 | 0 | 1176 | 19.6      | 8.35668  | 7.174103 | Unclassified | chrX:11613865-11659679    | 43.815  |
| Gm12185       | 0 | 0 | 0 | 23   | 0.383333  | 0.318204 | 2.233996 | Unclassified | chr11:48718157-48742661   | 22.505  |
| Gm10319       | 0 | 0 | 0 | 8    | 0.133333  | 0.065602 | 0        | Unclassified | chr6:122084645-122100976  | 14.332  |
| Reep6         | 0 | 0 | 0 | 50   | 0.833333  | 0.514792 | 2.961087 | Unclassified | chr10:79790914-79799186   | 6.273   |
| Prss23        | 0 | 0 | 0 | 8    | 0.133333  | 0.039728 | 1.375146 | Unclassified | chr7:96656294-96668096    | 9.803   |
| Liph          | 0 | 0 | 0 | 50   | 0.833333  | 0.477426 | 1.392723 | Unclassified | chr16:21953890-21997615   | 41.726  |
| Noto          | 0 | 0 | 0 | 14   | 0.233333  | 0.053625 | 2.396757 | Unclassified | chr6:85371879-85378869    | 4.991   |
| Pgm2          | 0 | 0 | 0 | 287  | 4.783333  | 21.2829  | 18.04639 | Stalled      | chr4:99600055-99659899    | 57.845  |
| Zfp157        | 0 | 0 | 0 | 250  | 4.166667  | 2.36037  | 15.4228  | Unclassified | chr5:138880703-138901922  | 19.22   |
| Gm128         | 0 | 0 | 0 | 194  | 3.233333  | 0.087186 | 4.06385  | Unclassified | chr3:95040841-95047031    | 4.191   |
| Rfc5          | 0 | 0 | 0 | 680  | 11.333333 | 13.6536  | 6.532868 | Unclassified | chr5:117829153-117841032  | 9.88    |
| Itga9         | 0 | 0 | 0 | 499  | 8.316667  | 0.168419 | 3.378571 | Unclassified | chr9:118513826-118810121  | 294.296 |
| Wdr86         | 0 | 0 | 0 | 113  | 1.883333  | 0.810887 | 1.76679  | Unclassified | chr5:24218086-24238498    | 18.413  |
| Dnaja1        | 0 | 0 | 0 | 820  | 13.66667  | 12.228   | 16.32038 | Unclassified | chr4:40667500-40684182    | 14.683  |
| Hsf2          | 0 | 0 | 0 | 162  | 2.7       | 2.24098  | 10.55738 | Stalled      | chr10:57204190-57232949   | 26.76   |
| Hspb1         | 0 | 0 | 0 | 17   | 0.283333  | 1.41709  | 0.583208 | Unclassified | chr5:136361788-136365433  | 1.646   |
| 9830107B12Rik | 0 | 0 | 0 | 14   | 0.233333  | 0.040838 | 1.923855 | Unclassified | chr17:48262554-48285218   | 20.665  |
| Mtus1         | 0 | 0 | 0 | 120  | 2         | 0.063231 | 1.643824 | Unclassified | chr8:42076265-42221080    | 142.816 |
| Olfir693      | 0 | 0 | 0 | 2    | 0.033333  | 0        | 2        | Unclassified | chr7:113821047-113823998  | 0.952   |
| Insl3         | 0 | 0 | 0 | 136  | 2.266667  | 0        | 0.851296 | Unclassified | chr8:74211150-74214474    | 1.325   |
| Olfir1129     | 0 | 0 | 0 | 2    | 0.033333  | 0.039436 | 0        | Unclassified | chr2:87413242-87416187    | 0.946   |
| BC048546      | 0 | 0 | 0 | 37   | 0.616667  | 0.057289 | 0.531165 | Unclassified | chr6:128489839-128533624  | 41.786  |
| Rab9b         | 0 | 0 | 0 | 5    | 0.083333  | 0.068154 | 2.473268 | Unclassified | chrX:133392689-133405079  | 10.391  |
| Trim52        | 0 | 0 | 0 | 3    | 0.05      | 0.008314 | 2        | Unclassified | chr14:106503414-106508497 | 3.084   |
| Luzp2         | 0 | 0 | 0 | 178  | 2.966667  | 0.034021 | 0.709667 | Unclassified | chr7:62088614-62524258    | 433.645 |
| Olfir1310     | 0 | 0 | 0 | 1    | 0.016667  | 0        | 0        | Unclassified | chr2:111848402-111851341  | 0.94    |
| Siglech       | 0 | 0 | 0 | 20   | 0.333333  | 0.13872  | 1.632836 | Unclassified | chr7:63021547-63034203    | 10.657  |
| Subgcp5       | 0 | 0 | 0 | 891  | 14.85     | 3.82596  | 27.13889 | Unclassified | chr7:63047517-63086817    | 37.301  |
| Sds           | 0 | 0 | 0 | 89   | 1.483333  | 0.407392 | 0        | Unclassified | chr5:120924555-120933914  | 7.36    |
| Pgk1          | 0 | 0 | 0 | 437  | 7.283333  | 72.9301  | 11.20613 | Unclassified | chrX:103380462-103399038  | 16.577  |
| Aldoart2      | 0 | 0 | 0 | 3    | 0.05      | 28.9615  | 0.730964 | Unclassified | chr12:56664121-56667696   | 1.576   |
| Tekt3         | 0 | 0 | 0 | 34   | 0.566667  | 0.03685  | 1.004712 | Unclassified | chr11:62873160-62908462   | 33.303  |
| Oas1e         | 0 | 0 | 0 | 14   | 0.333333  | 0.129214 | 0.855359 | Unclassified | chr5:121236320-121247539  | 9.22    |
| Psca          | 0 | 0 | 0 | 8    | 0.133333  | 0.06003  | 3        | Unclassified | chr15:74543268-74547493   | 2.226   |
| Reclq4        | 0 | 0 | 0 | 488  | 8.133333  | 6.76835  | 10.82614 | Unclassified | chr15:76534170-76542906   | 6.737   |
| Pdcl2         | 0 | 0 | 0 | 12   | 0.2       | 0.022948 | 0        | Unclassified | chr5:76741170-76762136    | 18.967  |
| Fam111a       | 0 | 0 | 0 | 598  | 9.966667  | 16.3662  | 6.70404  | Unclassified | chr19:12646014-12664186   | 16.173  |
| Zfp536        | 0 | 0 | 0 | 308  | 5.133333  | 0.107505 | 0.979118 | Unclassified | chr7:38264127-38556771    | 290.645 |
| Exoc6         | 0 | 0 | 0 | 758  | 12.63333  | 3.7603   | 23.06272 | Unclassified | chr19:37622907-37757739   | 132.833 |
| E330013P04Rik | 0 | 0 | 0 | 38   | 0.633333  | 0.272556 | 0.977541 | Unclassified | chr19:60218577-60238493   | 17.917  |
| Yipf4         | 0 | 0 | 0 | 254  | 4.233333  | 8.13562  | 29.09352 | Stalled      | chr17:74886853-74899617   | 10.765  |
| S100a16       | 0 | 0 | 0 | 5    | 0.083333  | 0        | 0.317406 | Unclassified | chr3:90343144-90347073    | 1.93    |
| Akr1b10       | 0 | 0 | 0 | 153  | 2.55      | 4.66416  | 15.6166  | Stalled      | chr6:34332246-34346949    | 12.704  |
| Dsel          | 0 | 0 | 0 | 53   | 0.883333  | 1.20511  | 17.08299 | Stalled      | chr1:113755278-113763495  | 6.218   |
| Fam50a        | 0 | 0 | 0 | 189  | 3.15      | 21.4571  | 14.04963 | Stalled      | chrX:71556371-71565487    | 7.117   |
| Fam50b        | 0 | 0 | 0 | 15   | 0.25      | 0.058478 | 0        | Unclassified | chr13:34829510-34839491   | 7.982   |
| Olfir92       | 0 | 0 | 0 | 0    | 0         | 0.068212 | 0        | Unclassified | chr17:37247986-37250925   | 0.94    |
| Xlir4a        | 0 | 0 | 0 | 5    | 0.083333  | 1.13389  | 2.345264 | Unclassified | chrX:70319683-70329846    | 8.164   |
| Taar9         | 0 | 0 | 0 | 3    | 0.05      | 0.024482 | 3        | Unclassified | chr10:23828293-23831340   | 1.048   |
| Stox2         | 0 | 0 | 0 | 200  | 3.333333  | 0.11503  | 0        | Unclassified | chr8:48265401-48439702    | 172.302 |
| Klri1         | 0 | 0 | 0 | 10   | 0.166667  | 0        | 0.677604 | Unclassified | chr6:129647235-129669150  | 19.916  |
| Prosapip1     | 0 | 0 | 0 | 107  | 1.783333  | 1.29854  | 7.888521 | Unclassified | chr2:130458574-130470539  | 9.966   |
| Fermt1        | 0 | 0 | 0 | 31   | 0.516667  | 0.051217 | 0.584878 | Unclassified | chr2:132729914-132773772  | 41.859  |
| Ucp3          | 0 | 0 | 0 | 53   | 0.883333  | 0.091614 | 1.396965 | Unclassified | chr7:107619499-107634941  | 13.443  |
| Pcdh11x       | 0 | 0 | 0 | 76   | 1.266667  | 0.048633 | 1.785235 | Unclassified | chrX:117401935-118020059  | 616.125 |
| Ucp1          | 0 | 0 | 0 | 8    | 0.133333  | 0.218283 | 5.260173 | Unclassified | chr8:85812246-85822355    | 8.11    |
| Ucn           | 0 | 0 | 0 | 7    | 0.116667  | 0.417924 | 4        | Unclassified | chr5:31440361-31443268    | 0.908   |
| Ubp1          | 0 | 0 | 0 | 803  | 13.38333  | 16.3194  | 13.40196 | Unclassified | chr9:113838051-113886319  | 46.269  |
| Tbx22         | 0 | 0 | 0 | 6    | 0.1       | 0.009556 | 0.800136 | Unclassified | chrX:104861302-104884318  | 21.017  |
| Ubr1          | 0 | 0 | 0 | 1050 | 17.5      | 3.04289  | 45.62067 | Unclassified | chr2:120686011-120798451  | 110.441 |
| Osbp2         | 0 | 0 | 0 | 503  | 8.383333  | 5.92843  | 9.08857  | Unclassified | chr2:179852070-179897385  | 43.316  |
| 2010003K11Rik | 0 | 0 | 0 | 6    | 0.1       | 0        | 2        | Unclassified | chr19:4496787-4500583     | 1.797   |
| 2310022B05Rik | 0 | 0 | 0 | 207  | 3.45      | 4.01571  | 13.34088 | Stalled      | chr8:127159656-127189269  | 27.614  |
| Gsta1         | 0 | 0 | 0 | 1    | 0.016667  | 0.099306 | 1        | Unclassified | chr9:78076475-78090490    | 12.016  |
| 1810065E05Rik | 0 | 0 | 0 | 5    | 0.083333  | 0.027711 | 0.494567 | Unclassified | chr11:58232612-58239525   | 4.914   |
| Rec8          | 0 | 0 | 0 | 146  | 2.433333  | 0.563768 | 0.083955 | Unclassified | chr14:56235006-56244227   | 7.222   |

|               |   |          |   |      |          |          |          |              |                           |         |
|---------------|---|----------|---|------|----------|----------|----------|--------------|---------------------------|---------|
| Trmt11        | 0 | 0        | 0 | 635  | 10.58333 | 1.58642  | 42.35435 | Unclassified | chr10:30254030-30322555   | 66.526  |
| Nr5a2         | 0 | 0        | 0 | 151  | 2.516667 | 0.07216  | 0.435806 | Unclassified | chr1:138740160-138859025  | 116.866 |
| Gm5382        | 0 | 0        | 0 | 0    | 0        | 0.035408 | 0        | Unclassified | chrX:13786273-13788783    | 0.511   |
| Mapk9         | 0 | 0        | 0 | 453  | 7.55     | 5.40019  | 15.21125 | Unclassified | chr11:49658252-49699923   | 39.672  |
| Sic5a9        | 0 | 0        | 0 | 32   | 0.533333 | 0.047032 | 0        | Unclassified | chr4:111547981-111577401  | 27.421  |
| Skint10       | 0 | 0        | 0 | 25   | 0.416667 | 0.033348 | 0        | Unclassified | chr4:112383434-112449466  | 64.033  |
| Cblb          | 0 | 0        | 0 | 641  | 10.68333 | 1.76523  | 33.10819 | Stalled      | chr16:52029661-52208159   | 176.499 |
| Negr1         | 0 | 0        | 0 | 445  | 7.416667 | 0.102513 | 0        | Unclassified | chr3:156222757-156979411  | 754.655 |
| G6pc2         | 0 | 0        | 0 | 6    | 0.1      | 0.02548  | 0        | Unclassified | chr2:69056054-69066045    | 7.992   |
| Rnf219        | 0 | 0        | 0 | 576  | 9.6      | 4.32001  | 17.5048  | Unclassified | chr14:104876750-104923883 | 45.134  |
| Zfp612        | 0 | 0        | 0 | 17   | 0.283333 | 0.98727  | 4.574691 | Unclassified | chr8:112601633-112616652  | 13.02   |
| Tspyl4        | 0 | 0        | 0 | 121  | 2.016667 | 5.45753  | 5.054128 | Unclassified | chr10:34015226-34021126   | 3.901   |
| Fam43b        | 0 | 0        | 0 | 7    | 0.116667 | 0.113706 | 1.252747 | Unclassified | chr4:137950006-137954373  | 2.368   |
| Defb14        | 0 | 0        | 0 | 1    | 0.016667 | 0        | 1        | Unclassified | chr8:19192356-19195212    | 0.857   |
| Actrt2        | 0 | 0        | 0 | 4    | 0.066667 | 0.026701 | 0.918112 | Unclassified | chr4:154040536-154043976  | 1.441   |
| Prox2         | 0 | 0        | 0 | 523  | 8.716667 | 2.89042  | 3.410843 | Unclassified | chr12:86427763-86449381   | 19.619  |
| Mfsd6         | 0 | 0        | 0 | 204  | 3.4      | 2.06881  | 9.436283 | Unclassified | chr1:52713147-52786162    | 71.016  |
| Alad          | 0 | 0        | 0 | 348  | 5.8      | 18.85    | 9.784632 | Unclassified | chr4:62170203-62183097    | 10.895  |
| Gtppb6        | 0 | 0        | 0 | 644  | 10.73333 | 14.1849  | 4.919856 | Unclassified | chr5:110532995-110539216  | 4.222   |
| Naga          | 0 | 0        | 0 | 119  | 1.983333 | 5.51284  | 7.980098 | Unclassified | chr15:82159961-82171256   | 9.296   |
| Supt16h       | 0 | 0        | 0 | 1206 | 20.1     | 24.2753  | 20.7063  | Unclassified | chr14:52780093-52818914   | 36.822  |
| Prnd          | 0 | 0        | 0 | 43   | 0.716667 | 1.0773   | 7.349763 | Unclassified | chr2:131774596-131781866  | 5.271   |
| G0s2          | 0 | 0        | 0 | 13   | 0.216667 | 0.318846 | 11       | Unclassified | chr1:195098353-195101382  | 1.03    |
| Erlin2        | 0 | 0        | 0 | 258  | 4.3      | 3.64197  | 15.76777 | Unclassified | chr8:28132330-28149896    | 15.567  |
| Hgsnat        | 0 | 0        | 0 | 396  | 6.6      | 4.62573  | 37.15893 | Stalled      | chr8:27054930-27089216    | 32.287  |
| Aplnr         | 0 | 0        | 0 | 8    | 0.133333 | 0.118703 | 0.921639 | Unclassified | chr2:84974516-84980079    | 3.564   |
| Olf1557       | 0 | 0        | 0 | 3    | 0.05     | 0.097002 | 0.05482  | Unclassified | chr7:109844729-109847786  | 1.058   |
| Adamts5       | 0 | 0        | 0 | 29   | 0.483333 | 0.057718 | 1.217051 | Unclassified | chr16:85858401-85903370   | 42.97   |
| Agr2          | 0 | 0        | 0 | 16   | 0.266667 | 0.050591 | 0        | Unclassified | chr12:36717511-36730668   | 11.158  |
| Serinc2       | 0 | 0        | 0 | 33   | 0.55     | 0.047822 | 0.842107 | Unclassified | chr4:129930740-129954830  | 22.091  |
| Adam25        | 0 | 0        | 0 | 1    | 0.016667 | 0        | 0        | Unclassified | chr8:41835561-41841530    | 3.97    |
| Olf1633       | 0 | 0        | 0 | 1    | 0.016667 | 0.075053 | 0        | Unclassified | chr7:111093081-111096020  | 0.94    |
| Csnk1d        | 0 | 0        | 0 | 1199 | 19.98333 | 35.4605  | 6.159475 | Unclassified | chr11:120823054-120854647 | 29.594  |
| Adamts1       | 0 | 0        | 0 | 8    | 0.133333 | 0.070837 | 1.247498 | Unclassified | chr16:85794072-85805360   | 9.289   |
| Olf1692       | 0 | 0        | 0 | 2    | 0.033333 | 0.038837 | 2        | Unclassified | chr7:112514841-112517831  | 0.991   |
| Olf1677       | 0 | 0        | 0 | 1    | 0.016667 | 0        | 0        | Unclassified | chr7:112202761-112205700  | 0.94    |
| Olf168        | 0 | 0        | 0 | 0    | 0        | 0.034041 | 0        | Unclassified | chr16:19530072-19533011   | 0.94    |
| Adam7         | 0 | 0        | 0 | 19   | 0.316667 | 0.055331 | 0        | Unclassified | chr14:69115393-69153746   | 36.354  |
| Olf1564       | 0 | 0        | 0 | 3    | 0.05     | 0.013445 | 3        | Unclassified | chr7:109949993-109952944  | 0.952   |
| Zic5          | 0 | 0        | 0 | 17   | 0.283333 | 0.895086 | 0.942857 | Unclassified | chr14:122858381-122866880 | 6.5     |
| Xlr5c         | 0 | 0        | 0 | 1    | 0.016667 | 0        | 0        | Unclassified | chrX:70530535-70537854    | 5.32    |
| Nt5m          | 0 | 0        | 0 | 463  | 7.716667 | 7.10383  | 18.24609 | Unclassified | chr11:59659574-59690035   | 28.462  |
| Pkd21l        | 0 | 0        | 0 | 48   | 0.8      | 0.04631  | 0        | Unclassified | chr19:44222126-44268932   | 44.807  |
| Xlr4b         | 0 | 0        | 0 | 11   | 0.183333 | 1.17639  | 3.196573 | Unclassified | chrX:70457703-70467792    | 8.09    |
| Lrp10         | 0 | 0        | 0 | 787  | 13.11667 | 61.7391  | 6.810585 | Unclassified | chr14:55080983-55089128   | 6.146   |
| Zfp275        | 0 | 0        | 0 | 288  | 4.8      | 2.7084   | 12.76462 | Unclassified | chrX:70585958-70604418    | 16.461  |
| Olf1697       | 0 | 0        | 0 | 0    | 0        | 0        | 0        | Unclassified | chr7:113884492-113887446  | 0.955   |
| Glipr11l      | 0 | 0        | 0 | 11   | 0.183333 | 0.02864  | 2.848779 | Unclassified | chr10:111495244-111515565 | 18.322  |
| Ccdc7         | 0 | 0        | 0 | 27   | 0.45     | 0.025582 | 0        | Unclassified | chr8:131503918-131591373  | 85.456  |
| Plic2         | 0 | 0        | 0 | 1260 | 21       | 6.97409  | 20.93595 | Unclassified | chr17:50646871-50827818   | 178.948 |
| a             | 0 | 0        | 0 | 524  | 8.733333 | 4.74079  | 0.065377 | Unclassified | chr2:154837305-154876748  | 37.444  |
| Spata4        | 0 | 0        | 0 | 4    | 0.066667 | 0.02425  | 0.734959 | Unclassified | chr8:55684133-55695451    | 9.319   |
| 0610031J06Rik | 0 | 0        | 0 | 134  | 2.233333 | 33.0168  | 5.482319 | Unclassified | chr3:88126944-88132553    | 3.61    |
| Ranbp9        | 0 | 0        | 0 | 1106 | 18.43333 | 8.67117  | 22.23105 | Unclassified | chr13:43498041-43578342   | 78.302  |
| Rhobtb1       | 0 | 0        | 0 | 699  | 11.65    | 3.14313  | 23.75965 | Unclassified | chr10:68673404-68754532   | 79.129  |
| Ccn1l         | 0 | 0        | 0 | 1267 | 21.11667 | 19.1767  | 12.02255 | Unclassified | chr3:65750072-65764147    | 12.076  |
| Vps41         | 0 | 0        | 0 | 631  | 10.51667 | 5.90326  | 16.0671  | Stalled      | chr13:18807160-18958678   | 149.519 |
| Pou6f2        | 0 | 0        | 0 | 180  | 3        | 0.090982 | 0        | Unclassified | chr13:18216793-18475873   | 257.081 |
| Zkscan2       | 0 | 0        | 0 | 15   | 0.25     | 0.058829 | 1.268538 | Unclassified | chr7:130622153-130645963  | 21.811  |
| Amph          | 0 | 0        | 0 | 112  | 1.866667 | 0.02808  | 1.947016 | Unclassified | chr13:19038239-19242784   | 202.546 |
| I118rap       | 0 | 0        | 0 | 37   | 0.616667 | 0.201466 | 2.616664 | Unclassified | chr1:40570206-40606142    | 33.937  |
| Cxcl15        | 0 | 0        | 0 | 7    | 0.116667 | 0.012051 | 0.556705 | Unclassified | chr5:91221559-91232093    | 8.535   |
| Sesn1         | 0 | 89.81012 | 0 | 218  | 3.633333 | 8.34741  | 14.9612  | Stalled      | chr10:41605244-41628242   | 20.999  |
| Rem2          | 0 | 0        | 0 | 59   | 0.983333 | 5.25618  | 0.791954 | Unclassified | chr14:55092936-55099271   | 4.336   |
| Sec63         | 0 | 0        | 0 | 755  | 12.58333 | 9.93792  | 11.58111 | Unclassified | chr10:42479301-42552320   | 71.02   |
| Gpr6          | 0 | 0        | 0 | 9    | 0.15     | 0.176048 | 6        | Unclassified | chr10:40790298-40793390   | 1.093   |
| Hexa          | 0 | 0        | 0 | 320  | 5.333333 | 11.7636  | 17.27858 | Unclassified | chr9:59385473-59412912    | 25.44   |
| Olf1260       | 0 | 0        | 0 | 0    | 0        | 0        | 0        | Unclassified | chr2:89815936-89818869    | 0.934   |
| Olf177        | 0 | 0        | 0 | 3    | 0.05     | 0        | 0.681579 | Unclassified | chr9:19719672-19726952    | 5.281   |
| Spr2e         | 0 | 0        | 0 | 2    | 0.033333 | 0.018029 | 0.235474 | Unclassified | chr3:92154064-92157371    | 1.308   |
| 4930578C19Rik | 0 | 0        | 0 | 14   | 0.233333 | 0        | 1.554309 | Unclassified | chrX:17995552-18040400    | 42.849  |
| Fam184a       | 0 | 0        | 0 | 75   | 1.25     | 0.074646 | 1.865603 | Unclassified | chr10:53352951-53472715   | 117.765 |
| Spr2d         | 0 | 0        | 0 | 2    | 0.033333 | 0.022691 | 1        | Unclassified | chr3:92141061-92144795    | 1.735   |
| Muc20         | 0 | 0        | 0 | 40   | 0.666667 | 0.151986 | 0.667088 | Unclassified | chr16:32777504-32799521   | 20.018  |
| Adh1          | 0 | 0        | 0 | 8    | 0.133333 | 0.03843  | 0.632507 | Unclassified | chr3:137938608-137953655  | 13.048  |
| Sic6a7        | 0 | 0        | 0 | 43   | 0.716667 | 0.034504 | 0        | Unclassified | chr18:61155033-61175853   | 18.821  |
| Ccl8          | 0 | 0        | 0 | 6    | 0.1      | 0        | 0.33979  | Unclassified | chr11:81926686-81930299   | 1.614   |
| Fam155a       | 0 | 0        | 0 | 330  | 5.5      | 0.069344 | 1.267428 | Unclassified | chr8:9206009-9773023      | 565.015 |
| 2200001I15Rik | 0 | 0        | 0 | 5    | 0.083333 | 0        | 0.385844 | Unclassified | chr14:35165067-35170579   | 3.513   |
| Ccl25         | 0 | 0        | 0 | 18   | 0.3      | 0.957184 | 2.765816 | Unclassified | chr8:4347614-4360020      | 10.407  |
| Tusc1         | 0 | 0        | 0 | 154  | 2.566667 | 4.51928  | 67       | Unclassified | chr4:93000838-93004202    | 1.365   |
| Olf1179       | 0 | 0        | 0 | 0    | 0        | 0        | 0        | Unclassified | chr2:88242165-88245089    | 0.925   |
| Cdk12         | 0 | 0        | 0 | 1362 | 22.7     | 11.8979  | 38.62971 | Unclassified | chr11:98062618-98114854   | 50.237  |
| Ccl27a        | 0 | 0        | 0 | 20   | 0.333333 | 0.596866 | 11.64631 | Stalled      | chr4:41716342-41723007    | 4.666   |
| Flrt1         | 0 | 0        | 0 | 43   | 0.716667 | 0        | 2.275364 | Unclassified | chr19:7166501-7182219     | 13.719  |
| Lonrf3        | 0 | 0        | 0 | 31   | 0.516667 | 0.152058 | 3.779609 | Unclassified | chrX:33866403-33906851    | 38.449  |

|               |   |   |   |      |          |          |          |              |                           |         |
|---------------|---|---|---|------|----------|----------|----------|--------------|---------------------------|---------|
| Ly6k          | 0 | 0 | 0 | 12   | 0.2      | 3.21606  | 4.605469 | Unclassified | chr15:74627303-74632398   | 3.096   |
| Dync2h1       | 0 | 0 | 0 | 392  | 6.533333 | 0.787771 | 23.41173 | Stalled      | chr9:6928502-7179046      | 248.545 |
| Ccl4          | 0 | 0 | 0 | 15   | 0.25     | 1.08745  | 1.94256  | Unclassified | chr11:83474085-83478185   | 2.101   |
| Olfr399       | 0 | 0 | 0 | 4    | 0.066667 | 0        | 2        | Unclassified | chr11:73867323-73870259   | 0.937   |
| Olfr395       | 0 | 0 | 0 | 1    | 0.016667 | 0.040947 | 0        | Unclassified | chr11:73720053-73722992   | 0.94    |
| Olfr174       | 0 | 0 | 0 | 1    | 0.016667 | 0.023762 | 1        | Unclassified | chr16:58823606-58828587   | 2.982   |
| Olfr139       | 0 | 0 | 0 | 4    | 0.066667 | 0.027039 | 4        | Unclassified | chr11:73857826-73860774   | 0.949   |
| Olfr173       | 0 | 0 | 0 | 4    | 0.066667 | 0.038557 | 1        | Unclassified | chr16:58796575-58799738   | 1.164   |
| Olfr172       | 0 | 0 | 0 | 3    | 0.05     | 0        | 2        | Unclassified | chr16:58760265-58763353   | 1.089   |
| Olfr195       | 0 | 0 | 0 | 2    | 0.033333 | 0        | 0        | Unclassified | chr16:59146677-59149604   | 0.928   |
| Olfr181       | 0 | 0 | 0 | 0    | 0        | 0.011109 | 0        | Unclassified | chr16:58925382-58930470   | 3.089   |
| Olfr392       | 0 | 0 | 0 | 2    | 0.033333 | 0        | 0        | Unclassified | chr11:73627643-73632379   | 2.737   |
| Olfr394       | 0 | 0 | 0 | 0    | 0        | 0        | 0        | Unclassified | chr11:73700939-73703872   | 0.934   |
| Mcm3          | 0 | 0 | 0 | 1004 | 16.73333 | 73.8547  | 2.829285 | Elongating   | chr1:20793094-20812294    | 17.201  |
| Mcm2          | 0 | 0 | 0 | 1221 | 20.35    | 42.5881  | 4.252742 | Unclassified | chr6:88833467-88850774    | 15.308  |
| Zbtb12        | 0 | 0 | 0 | 228  | 3.8      | 5.39077  | 2.81239  | Elongating   | chr17:35029503-35033789   | 2.287   |
| Rhpn2         | 0 | 0 | 0 | 173  | 2.883333 | 0.621531 | 3.243781 | Unclassified | chr7:36117255-36177304    | 58.05   |
| Chrna2        | 0 | 0 | 0 | 317  | 5.283333 | 0.245175 | 0        | Unclassified | chr14:66757796-66771785   | 11.99   |
| Scal          | 0 | 0 | 0 | 406  | 6.766667 | 0.603393 | 30.10328 | Stalled      | chr2:38921734-39048250    | 124.517 |
| Spef2         | 0 | 0 | 0 | 121  | 2.016667 | 0.727114 | 17.20958 | Stalled      | chr15:9592490-9680561     | 86.072  |
| Ube2v2        | 0 | 0 | 0 | 613  | 10.21667 | 1.05417  | 25.04861 | Unclassified | chr16:15551078-15596611   | 43.534  |
| Yaf2          | 0 | 0 | 0 | 443  | 7.383333 | 6.02877  | 10.36416 | Unclassified | chr15:93114263-93169366   | 53.104  |
| Ipo9          | 0 | 0 | 0 | 783  | 13.05    | 10.3553  | 17.3887  | Unclassified | chr1:137278891-137329068  | 48.178  |
| Casp3         | 0 | 0 | 0 | 636  | 10.6     | 22.1544  | 26.22128 | Unclassified | chr8:47700802-47724062    | 21.261  |
| Casp14        | 0 | 0 | 0 | 8    | 0.133333 | 0.016878 | 0        | Unclassified | chr10:78174741-78182987   | 6.247   |
| Pla2g2a       | 0 | 0 | 0 | 7    | 0.116667 | 0        | 1.312711 | Unclassified | chr4:138385771-138391104  | 3.334   |
| Casp4         | 0 | 0 | 0 | 284  | 4.733333 | 8.51041  | 3.654651 | Unclassified | chr9:5306859-5336791      | 27.933  |
| Casp1         | 0 | 0 | 0 | 69   | 1.15     | 10.705   | 3.563475 | Unclassified | chr9:5296516-5307281      | 8.766   |
| Cask          | 0 | 0 | 0 | 318  | 5.3      | 0.259139 | 20.68322 | Stalled      | chrX:13094207-13425667    | 329.461 |
| Chpt1         | 0 | 0 | 0 | 150  | 2.5      | 6.70114  | 18.46515 | Stalled      | chr10:87935559-87968715   | 31.157  |
| Casp7         | 0 | 0 | 0 | 273  | 4.55     | 2.27488  | 16.36782 | Stalled      | chr19:56469618-56516833   | 45.216  |
| Casp6         | 0 | 0 | 0 | 182  | 3.033333 | 6.69395  | 4.557955 | Unclassified | chr3:129602342-129617020  | 12.679  |
| AU017455      | 0 | 0 | 0 | 61   | 1.016667 | 0.223203 | 1.172708 | Unclassified | chr14:79612161-79649174   | 35.014  |
| Nlrp6         | 0 | 0 | 0 | 18   | 0.3      | 0.656982 | 0.28088  | Unclassified | chr7:148104800-148114439  | 7.64    |
| Ccar1         | 0 | 0 | 0 | 858  | 14.3     | 13.1146  | 22.46306 | Unclassified | chr10:62206677-62257116   | 48.44   |
| Gadd45gip1    | 0 | 0 | 0 | 516  | 8.6      | 46.7517  | 3.148764 | Unclassified | chr8:87354180-87359381    | 3.202   |
| Cd248         | 0 | 0 | 0 | 9    | 0.15     | 0.220109 | 1.754701 | Unclassified | chr19:5066077-5070639     | 2.563   |
| Scn11a        | 0 | 0 | 0 | 101  | 1.683333 | 0.041733 | 0        | Unclassified | chr9:119662882-119736574  | 71.693  |
| Crisp4        | 0 | 0 | 0 | 11   | 0.183333 | 0        | 0        | Unclassified | chr1:18105271-18129132    | 21.862  |
| Ncstn         | 0 | 0 | 0 | 556  | 9.266667 | 14.3655  | 14.02393 | Unclassified | chr1:173996144-174014880  | 16.737  |
| Ankrd56       | 0 | 0 | 0 | 15   | 0.25     | 0.223373 | 1.303674 | Unclassified | chr5:93470148-93476048    | 3.901   |
| Cav3          | 0 | 0 | 0 | 18   | 0.3      | 0.055386 | 0.903869 | Unclassified | chr6:112407498-112422866  | 13.369  |
| Nckap1        | 0 | 0 | 0 | 111  | 1.85     | 0.325422 | 6.914315 | Unclassified | chr2:80341451-80423122    | 79.672  |
| 4930503B20Rik | 0 | 0 | 0 | 7    | 0.116667 | 0.025279 | 0        | Unclassified | chr3:146309222-146316281  | 5.06    |
| 4930502E18Rik | 0 | 0 | 0 | 5    | 0.083333 | 0        | 0        | Unclassified | chrX:51026007-51041399    | 13.393  |
| 4930511M11Rik | 0 | 0 | 0 | 47   | 0.783333 | 0.090837 | 0        | Unclassified | chr5:3655003-3679416      | 22.414  |
| Rnase10       | 0 | 0 | 0 | 3    | 0.05     | 0.035438 | 0.646768 | Unclassified | chr14:51625603-51630433   | 2.831   |
| Cris1         | 0 | 0 | 0 | 243  | 4.05     | 7.03487  | 26.05825 | Stalled      | chr2:132670401-132692504  | 20.104  |
| Sycp3         | 0 | 0 | 0 | 15   | 0.25     | 0.046068 | 2.450363 | Unclassified | chr10:87920331-87935980   | 13.65   |
| Syn1          | 0 | 0 | 0 | 219  | 3.65     | 0.540687 | 1.992038 | Unclassified | chrX:20437636-20500044    | 60.409  |
| Syn2          | 0 | 0 | 0 | 134  | 2.233333 | 0.251509 | 2.175927 | Unclassified | chr6:115082919-115232644  | 147.726 |
| Fbxw2         | 0 | 0 | 0 | 990  | 16.5     | 13.3438  | 10.5522  | Unclassified | chr2:34659883-34683755    | 21.873  |
| Sdc1          | 0 | 0 | 0 | 163  | 2.716667 | 5.20519  | 5.767458 | Unclassified | chr12:8776201-8800493     | 22.293  |
| 1700057K13Rik | 0 | 0 | 0 | 19   | 0.316667 | 0.028544 | 1.581283 | Unclassified | chr1:159029278-159040776  | 9.499   |
| Sult4a1       | 0 | 0 | 0 | 46   | 0.766667 | 0.27429  | 1.252232 | Unclassified | chr15:83906526-83938184   | 29.659  |
| Serpina3b     | 0 | 0 | 0 | 15   | 0.25     | 0.044599 | 0        | Unclassified | chr12:105364205-105377755 | 11.551  |
| Foxl2os       | 0 | 0 | 0 | 12   | 0.2      | 0.153216 | 0.668639 | Unclassified | chr9:98850199-98857718    | 5.52    |
| Es1           | 0 | 0 | 0 | 14   | 0.233333 | 0.101435 | 0        | Unclassified | chr8:95622915-95657182    | 32.268  |
| Sorcs3        | 0 | 0 | 0 | 391  | 6.516667 | 0.070924 | 0.607299 | Unclassified | chr19:48278514-48879995   | 599.482 |
| Pcdh10        | 0 | 0 | 0 | 39   | 0.65     | 0.121311 | 1.835701 | Unclassified | chr3:45180319-45238501    | 56.183  |
| Serpinb12     | 0 | 0 | 0 | 18   | 0.3      | 0.015194 | 0        | Unclassified | chr1:108829025-108853655  | 22.631  |
| 1700023E05Rik | 0 | 0 | 0 | 61   | 1.016667 | 2.09463  | 3.194911 | Unclassified | chr5:77443047-77490547    | 45.501  |
| Ddc8          | 0 | 0 | 0 | 24   | 0.4      | 0.038877 | 0        | Unclassified | chr11:118193673-118205848 | 10.176  |
| Accs1         | 0 | 0 | 0 | 24   | 0.4      | 0.065028 | 0        | Unclassified | chr2:93695519-93711260    | 13.742  |
| Lym2          | 0 | 0 | 0 | 343  | 5.716667 | 8.61235  | 23.88919 | Unclassified | chr4:32885233-32889227    | 1.995   |
| Zswim2        | 0 | 0 | 0 | 68   | 1.133333 | 0.571652 | 12.54435 | Stalled      | chr2:83755235-83783383    | 26.149  |
| Wdr16         | 0 | 0 | 0 | 146  | 2.433333 | 0.168542 | 3.291105 | Unclassified | chr11:67738307-67781144   | 40.838  |
| Fbxo30        | 0 | 0 | 0 | 547  | 9.116667 | 1.45293  | 44.52918 | Unclassified | chr10:10999127-11017767   | 16.641  |
| Rab40b        | 0 | 0 | 0 | 63   | 1.05     | 0.330034 | 1.39709  | Unclassified | chr11:121217435-121251565 | 32.131  |
| Tmem179       | 0 | 0 | 0 | 37   | 0.616667 | 0.048608 | 1.247936 | Unclassified | chr12:113738394-113751371 | 10.978  |
| Rab15         | 0 | 0 | 0 | 37   | 0.616667 | 0.401678 | 1.759648 | Unclassified | chr12:77898949-77925511   | 24.563  |
| Ctbp2         | 0 | 0 | 0 | 243  | 4.05     | 0.145069 | 1.474651 | Unclassified | chr7:140178693-140317166  | 136.474 |
| Cstb          | 0 | 0 | 0 | 233  | 3.883333 | 34.3359  | 15.17091 | Unclassified | chr10:77886414-77890367   | 1.954   |
| Spef1         | 0 | 0 | 0 | 131  | 2.183333 | 2.91128  | 6.355711 | Unclassified | chr2:130995996-131002546  | 4.551   |
| Cst8          | 0 | 0 | 0 | 1    | 0.016667 | 0.036462 | 0        | Unclassified | chr2:148622574-148631320  | 6.747   |
| Lrrc10        | 0 | 0 | 0 | 15   | 0.25     | 0.421826 | 0.875766 | Unclassified | chr10:116480396-116483824 | 1.429   |
| Cst7          | 0 | 0 | 0 | 172  | 2.866667 | 5.56156  | 3.048975 | Unclassified | chr2:150394150-150404678  | 8.529   |
| Phf6          | 0 | 0 | 0 | 599  | 9.983333 | 6.22629  | 13.72648 | Unclassified | chrX:50263442-50310120    | 44.679  |
| Ctf1          | 0 | 0 | 0 | 22   | 0.366667 | 0.667021 | 3.886997 | Unclassified | chr7:134854249-134861699  | 5.451   |
| BC061237      | 0 | 0 | 0 | 4    | 0.066667 | 0        | 0.635258 | Unclassified | chr14:45117792-45126016   | 6.225   |
| Olfr1153      | 0 | 0 | 0 | 1    | 0.016667 | 0        | 1        | Unclassified | chr2:87734333-87737290    | 0.958   |
| Olfr1141      | 0 | 0 | 0 | 0    | 0        | 0        | 0        | Unclassified | chr2:87593212-87596148    | 0.937   |
| 1700061G19Rik | 0 | 0 | 0 | 107  | 1.783333 | 0.26088  | 0.323487 | Unclassified | chr17:57013055-57028261   | 13.207  |
| Lrrcc1        | 0 | 0 | 0 | 242  | 4.033333 | 3.19516  | 31.75744 | Stalled      | chr3:14531787-14572657    | 38.871  |
| Dram1         | 0 | 0 | 0 | 100  | 1.666667 | 1.06346  | 15.79296 | Stalled      | chr10:87785548-87821820   | 34.273  |
| S100a7a       | 0 | 0 | 0 | 5    | 0.083333 | 0.08648  | 0.414348 | Unclassified | chr3:90456223-90462052    | 3.83    |



|               |   |   |   |      |          |          |          |              |                           |         |
|---------------|---|---|---|------|----------|----------|----------|--------------|---------------------------|---------|
| Cnga4         | 0 | 0 | 0 | 6    | 0.1      | 0.025839 | 0.513934 | Unclassified | chr7:112551081-112557252  | 4.172   |
| Gdf3          | 0 | 0 | 0 | 8    | 0.133333 | 0.048616 | 1.269896 | Unclassified | chr6:122555420-122562089  | 4.67    |
| Olf1158       | 0 | 0 | 0 | 1    | 0.016667 | 0        | 1        | Unclassified | chr2:87828269-87831211    | 0.943   |
| Olf38         | 0 | 0 | 0 | 2    | 0.033333 | 0.040271 | 1        | Unclassified | chr6:42710052-42713006    | 0.955   |
| Slc4a1ap      | 0 | 0 | 0 | 432  | 7.2      | 15.8187  | 18.71355 | Unclassified | chr5:31827367-31856411    | 27.045  |
| Atxn10        | 0 | 0 | 0 | 1266 | 21.1     | 14.848   | 36.87723 | Unclassified | chr15:85164810-85294266   | 127.457 |
| Irf6          | 0 | 0 | 0 | 107  | 1.783333 | 0.164624 | 0.608014 | Unclassified | chr1:194977305-194998229  | 18.925  |
| Ggt1          | 0 | 0 | 0 | 30   | 0.5      | 0.152123 | 0.61669  | Unclassified | chr10:75034337-75048927   | 12.591  |
| Nhlh1         | 0 | 0 | 0 | 10   | 0.166667 | 0.329813 | 0.38086  | Unclassified | chr1:173982422-173989727  | 5.306   |
| Lsr           | 0 | 0 | 0 | 293  | 4.883333 | 3.08527  | 1.058628 | Elongating   | chr7:31742790-31760488    | 15.699  |
| Acrbp         | 0 | 0 | 0 | 97   | 1.616667 | 2.48289  | 3.07126  | Unclassified | chr6:124997944-125013283  | 13.34   |
| Ggpps1        | 0 | 0 | 0 | 482  | 8.033333 | 4.5713   | 35.34446 | Unclassified | chr13:14144713-14157668   | 10.956  |
| Pdlim1        | 0 | 0 | 0 | 422  | 7.033333 | 21.6296  | 9.338138 | Unclassified | chr19:40296728-40348106   | 49.379  |
| Acsn3         | 0 | 0 | 0 | 67   | 1.116667 | 0.075374 | 0        | Unclassified | chr7:126902436-126928410  | 23.975  |
| Mybpc3        | 0 | 0 | 0 | 304  | 5.066667 | 0.160504 | 6.614444 | Unclassified | chr2:90956300-90976673    | 18.374  |
| Ralgapa2      | 0 | 0 | 0 | 1497 | 24.95    | 3.23594  | 16.6053  | Unclassified | chr2:146067034-146339740  | 270.707 |
| Saa4          | 0 | 0 | 0 | 5    | 0.083333 | 0.04097  | 1.918139 | Unclassified | chr7:53983368-53989913    | 4.546   |
| Magee2        | 0 | 0 | 0 | 7    | 0.116667 | 1.33872  | 5        | Unclassified | chrX:102050290-102054606  | 2.317   |
| Mmp27         | 0 | 0 | 0 | 9    | 0.15     | 0.046436 | 0        | Unclassified | chr9:7569457-7581393      | 9.937   |
| Khdrbs1       | 0 | 0 | 0 | 914  | 15.23333 | 46.7859  | 23.47263 | Unclassified | chr4:129392102-129421526  | 27.425  |
| Mybl1         | 0 | 0 | 0 | 251  | 4.183333 | 1.41444  | 54.08945 | Stalled      | chr1:9658915-9692290      | 31.376  |
| Tceb2         | 0 | 0 | 0 | 555  | 9.25     | 57.5175  | 1.582398 | Elongating   | chr17:23961706-23968076   | 4.371   |
| Cuta          | 0 | 0 | 0 | 319  | 5.316667 | 38.7759  | 9.223589 | Unclassified | chr17:27074916-27078413   | 1.498   |
| Rpp21         | 0 | 0 | 0 | 221  | 3.683333 | 27.0133  | 19.01232 | Stalled      | chr17:36392617-36396791   | 2.175   |
| Rbl2l14       | 0 | 0 | 0 | 74   | 1.233333 | 0.294269 | 0.365063 | Unclassified | chr6:134344346-134388742  | 42.397  |
| Rbm22         | 0 | 0 | 0 | 555  | 9.25     | 19.626   | 13.5343  | Unclassified | chr18:60718439-60732383   | 11.945  |
| Duoxa2        | 0 | 0 | 0 | 10   | 0.166667 | 0.386198 | 0.271867 | Unclassified | chr2:122122635-122128621  | 3.987   |
| Olf624        | 0 | 0 | 0 | 0    | 0        | 0        | 0        | Unclassified | chr7:110818616-110821543  | 0.928   |
| Olf699        | 0 | 0 | 0 | 2    | 0.033333 | 0        | 1        | Unclassified | chr7:113933562-113936513  | 0.952   |
| Olf406        | 0 | 0 | 0 | 2    | 0.033333 | 0.029052 | 2        | Unclassified | chr11:74080892-74083864   | 0.973   |
| Olf917        | 0 | 0 | 0 | 0    | 0        | 0        | 0        | Unclassified | chr9:38472497-38475427    | 0.931   |
| Hpcal4        | 0 | 0 | 0 | 37   | 0.616667 | 0.181831 | 3.280025 | Unclassified | chr4:122858746-122871942  | 11.197  |
| Gimap9        | 0 | 0 | 0 | 276  | 4.6      | 10.4236  | 5.354602 | Unclassified | chr6:48624133-48628703    | 2.571   |
| Tmem221       | 0 | 0 | 0 | 35   | 0.583333 | 0.983307 | 6.246957 | Unclassified | chr8:74078202-74084770    | 4.569   |
| Fmo4          | 0 | 0 | 0 | 12   | 0.2      | 0        | 1.277143 | Unclassified | chr1:164724013-164744680  | 18.668  |
| Erb2ip        | 0 | 0 | 0 | 928  | 15.46667 | 6.12044  | 22.706   | Unclassified | chr13:104608865-104712594 | 101.73  |
| Kcnv1         | 0 | 0 | 0 | 8    | 0.133333 | 0.031357 | 1.970134 | Unclassified | chr15:44937829-44948480   | 8.652   |
| Olf1241       | 0 | 0 | 0 | 1    | 0.016667 | 0.027125 | 0        | Unclassified | chr2:89322345-89325290    | 0.946   |
| Anub1         | 0 | 0 | 0 | 334  | 5.566667 | 0.5713   | 36.09695 | Stalled      | chr6:116212252-116279644  | 65.393  |
| Gpr34         | 0 | 0 | 0 | 6    | 0.1      | 0.222834 | 0.639347 | Unclassified | chrX:13207894-13217984    | 8.091   |
| Grem1         | 0 | 0 | 0 | 15   | 0.25     | 0.046918 | 0        | Unclassified | chr2:113588831-113600805  | 9.975   |
| Tmem81        | 0 | 0 | 0 | 64   | 1.066667 | 1.57425  | 0.432506 | Unclassified | chr1:134400806-134405216  | 2.411   |
| Usp47         | 0 | 0 | 0 | 755  | 12.58333 | 9.50314  | 29.95842 | Unclassified | chr7:119165019-119254894  | 87.876  |
| Map3k7ip3     | 0 | 0 | 0 | 178  | 2.966667 | 1.02181  | 24.94352 | Stalled      | chrX:82817360-82879807    | 60.448  |
| Lrrk2         | 0 | 0 | 0 | 505  | 8.416667 | 3.8237   | 12.02759 | Stalled      | chr15:91501654-91646555   | 142.902 |
| Hras15        | 0 | 0 | 0 | 22   | 0.366667 | 0.073657 | 0.587827 | Unclassified | chr19:7685058-7713728     | 26.671  |
| Klhl10        | 0 | 0 | 0 | 244  | 4.066667 | 0.178358 | 1.822777 | Unclassified | chr11:100301237-100318338 | 15.102  |
| Spag16        | 0 | 0 | 0 | 389  | 6.483333 | 0.024114 | 0.698089 | Unclassified | chr1:69871561-70771706    | 898.146 |
| Oaz2          | 0 | 0 | 0 | 186  | 3.1      | 8.11586  | 10.42622 | Unclassified | chr9:65522354-65538107    | 13.754  |
| Cald1         | 0 | 0 | 0 | 72   | 1.2      | 0.082584 | 0.992574 | Unclassified | chr6:34657443-34725469    | 66.027  |
| Ttc39c        | 0 | 0 | 0 | 296  | 4.933333 | 1.12358  | 10.59638 | Stalled      | chr18:12800041-12895560   | 93.52   |
| Dsp           | 0 | 0 | 0 | 38   | 0.633333 | 0.113573 | 2.364949 | Unclassified | chr13:38241162-38290446   | 47.285  |
| C230055K05Rik | 0 | 0 | 0 | 150  | 2.5      | 1.10076  | 7.607973 | Unclassified | chr5:105242186-105291087  | 46.902  |
| Olf447        | 0 | 0 | 0 | 1    | 0.016667 | 0        | 0        | Unclassified | chr6:42859523-42862456    | 0.934   |
| Lxn           | 0 | 0 | 0 | 173  | 2.883333 | 5.91425  | 5.899585 | Unclassified | chr3:67261920-67269829    | 5.91    |
| 1700009P17Rik | 0 | 0 | 0 | 45   | 0.75     | 0.359452 | 0.641262 | Unclassified | chr1:173049791-173057098  | 5.308   |
| Krt72         | 0 | 0 | 0 | 12   | 0.2      | 0.049199 | 0.526627 | Unclassified | chr15:101606990-101618889 | 9.9     |
| Cdh3          | 0 | 0 | 0 | 73   | 1.216667 | 0.070582 | 0.384715 | Unclassified | chr8:109032790-109080808  | 46.019  |
| Cdh6          | 0 | 0 | 0 | 79   | 1.316667 | 0.038955 | 1.285187 | Unclassified | chr15:12963954-13105394   | 139.441 |
| Hhex          | 0 | 0 | 0 | 435  | 7.25     | 8.77228  | 9.715222 | Unclassified | chr19:37507330-37515221   | 5.892   |
| Cdh9          | 0 | 0 | 0 | 21   | 0.35     | 0        | 0        | Unclassified | chr15:16705855-16786532   | 78.678  |
| Cdh8          | 0 | 0 | 0 | 151  | 2.516667 | 0.020292 | 0.724559 | Unclassified | chr8:101552668-101942357  | 387.69  |
| Cdk2          | 0 | 0 | 0 | 472  | 7.866667 | 19.6392  | 12.6369  | Unclassified | chr10:128134994-128144107 | 7.114   |
| Ckt2          | 0 | 0 | 0 | 2    | 0.033333 | 0.01936  | 1        | Unclassified | chr16:64477636-64480960   | 1.325   |
| Ii17rb        | 0 | 0 | 0 | 96   | 1.6      | 0.149244 | 0.461221 | Unclassified | chr14:30809353-30824082   | 12.73   |
| C1s           | 0 | 0 | 0 | 13   | 0.216667 | 0.048405 | 1.000772 | Unclassified | chr6:124480361-124494377  | 12.017  |
| Arhgap8       | 0 | 0 | 0 | 114  | 1.9      | 0.407137 | 3.796819 | Unclassified | chr15:84548508-84602636   | 52.129  |
| Kcnmb1        | 0 | 0 | 0 | 32   | 0.533333 | 0.058145 | 1.11208  | Unclassified | chr11:33861012-33873638   | 10.627  |
| Kcnk7         | 0 | 0 | 0 | 194  | 3.233333 | 0.161134 | 1.197064 | Elongating   | chr19:5702475-5707101     | 2.627   |
| Kcnma1        | 0 | 0 | 0 | 533  | 8.883333 | 0.047454 | 1.711973 | Unclassified | chr14:24117982-24825427   | 705.446 |
| P2ry13        | 0 | 0 | 0 | 33   | 0.55     | 0.243348 | 1.772242 | Unclassified | chr3:59011813-59016804    | 2.992   |
| Kcns2         | 0 | 0 | 0 | 6    | 0.1      | 0.029395 | 1.137683 | Unclassified | chr15:34765135-34772092   | 4.958   |
| Rnd3          | 0 | 0 | 0 | 40   | 0.666667 | 0.94751  | 4.747459 | Unclassified | chr2:50985958-51006631    | 18.674  |
| Elp3          | 0 | 0 | 0 | 613  | 10.21667 | 13.658   | 17.61976 | Unclassified | chr14:66149292-66213847   | 62.556  |
| Ttc27         | 0 | 0 | 0 | 924  | 15.4     | 7.90176  | 26.86618 | Unclassified | chr17:75115089-75262910   | 145.822 |
| Cer1          | 0 | 0 | 0 | 3    | 0.05     | 0.095644 | 3        | Unclassified | chr4:82527654-82533055    | 3.402   |
| Ces1          | 0 | 0 | 0 | 14   | 0.233333 | 0        | 0        | Unclassified | chr8:95826294-95863104    | 34.811  |
| Cfc1          | 0 | 0 | 0 | 19   | 0.316667 | 0.148166 | 0.621528 | Unclassified | chr1:34590492-34601156    | 8.665   |
| Slitrk6       | 0 | 0 | 0 | 2    | 0.033333 | 0.006166 | 0        | Unclassified | chr14:111147799-111156371 | 6.573   |
| Cfh           | 0 | 0 | 0 | 22   | 0.366667 | 0.022177 | 0        | Unclassified | chr1:141982431-142081988  | 97.558  |
| Ii17a         | 0 | 0 | 0 | 6    | 0.1      | 0.02189  | 0        | Unclassified | chr1:20718985-20724577    | 3.593   |
| Nuak2         | 0 | 0 | 0 | 326  | 5.433333 | 5.1087   | 8.423794 | Unclassified | chr1:134210714-134230065  | 17.352  |
| Ppp1r8        | 0 | 0 | 0 | 778  | 12.96667 | 24.8937  | 12.66454 | Unclassified | chr4:132382839-132401084  | 16.246  |
| Zfr           | 0 | 0 | 0 | 991  | 16.51667 | 10.9496  | 27.94842 | Unclassified | chr15:12045605-12115205   | 67.601  |
| Pitpnm3       | 0 | 0 | 0 | 202  | 3.366667 | 0.134585 | 1.237598 | Unclassified | chr11:71861029-71951391   | 88.363  |
| Gtpbp5        | 0 | 0 | 0 | 392  | 6.533333 | 6.24702  | 33.46908 | Unclassified | chr2:179803297-179820607  | 15.311  |

|                      |   |          |   |      |           |          |          |              |                           |         |
|----------------------|---|----------|---|------|-----------|----------|----------|--------------|---------------------------|---------|
| <b>Sgsm1</b>         | 0 | 0        | 0 | 82   | 1.366667  | 0.11236  | 0.454163 | Unclassified | chr5:113672243-113741806  | 67.564  |
| <b>Myoz3</b>         | 0 | 0        | 0 | 141  | 2.35      | 0.086826 | 0.108969 | Unclassified | chr18:60733372-60753370   | 17.999  |
| <b>Lcor</b>          | 0 | 0        | 0 | 85   | 1.416667  | 0.593603 | 0.556584 | Unclassified | chr19:41622128-41634271   | 10.144  |
| <b>Fbxw13</b>        | 0 | 0        | 0 | 12   | 0.2       | 0        | 0        | Unclassified | chr9:109081740-109100489  | 16.75   |
| <b>Bpil3</b>         | 0 | 0        | 0 | 12   | 0.2       | 0.053818 | 0.509082 | Unclassified | chr2:153724123-153738529  | 12.407  |
| <b>Cpne2</b>         | 0 | 0        | 0 | 194  | 3.233333  | 1.41924  | 5.227971 | Unclassified | chr8:97054927-97094429    | 37.503  |
| <b>2310005G13Rik</b> | 0 | 0        | 0 | 17   | 0.283333  | 0.020894 | 1.379922 | Unclassified | chr16:57037079-57073459   | 34.381  |
| <b>Commd10</b>       | 0 | 0        | 0 | 854  | 14.233333 | 6.24498  | 32.31357 | Unclassified | chr18:47116529-47247648   | 129.12  |
| <b>Clic3</b>         | 0 | 0        | 0 | 78   | 1.3       | 1.31487  | 0.833303 | Unclassified | chr2:25310362-25314292    | 1.931   |
| <b>Foxr2</b>         | 0 | 0        | 0 | 7    | 0.116667  | 0.027966 | 0.723375 | Unclassified | chrX:149551330-149567404  | 14.075  |
| <b>Pdp2</b>          | 0 | 0        | 0 | 360  | 6         | 5.30421  | 13.3444  | Unclassified | chr8:107113367-107120749  | 5.383   |
| <b>Tigd2</b>         | 0 | 0        | 0 | 227  | 3.783333  | 7.64443  | 13.22137 | Stalled      | chr6:59156863-59162027    | 3.165   |
| <b>Rab27b</b>        | 0 | 0        | 0 | 104  | 1.733333  | 0.020284 | 1.225692 | Unclassified | chr18:70138784-70303244   | 162.461 |
| <b>Brca2</b>         | 0 | 0        | 0 | 571  | 9.516667  | 2.37597  | 77.18317 | Stalled      | chr5:151323197-151372324  | 47.128  |
| <b>Spata9</b>        | 0 | 0        | 0 | 37   | 0.616667  | 0.267767 | 0.470661 | Unclassified | chr13:76103186-76136416   | 31.231  |
| <b>Nhej1</b>         | 0 | 0        | 0 | 336  | 5.6       | 5.21906  | 78.86425 | Stalled      | chr1:75013919-75123800    | 107.882 |
| <b>Dapk1</b>         | 0 | 0        | 0 | 161  | 2.683333  | 0.08492  | 0.505108 | Unclassified | chr13:60701307-60864547   | 161.241 |
| <b>Clybl</b>         | 0 | 0        | 0 | 736  | 12.26667  | 5.60592  | 55.49956 | Stalled      | chr14:122578915-122801454 | 220.54  |
| <b>Olfr1322</b>      | 0 | 0        | 0 | 0    | 0         | 0        | 0        | Unclassified | chrX:47238645-47241578    | 0.934   |
| <b>B230380D07Rik</b> | 0 | 0        | 0 | 603  | 10.05     | 7.32931  | 22.69594 | Unclassified | chr9:70446820-70506981    | 58.162  |
| <b>Olfr598</b>       | 0 | 0        | 0 | 0    | 0         | 0.077942 | 0        | Unclassified | chr7:110475001-110477961  | 0.961   |
| <b>Olfr1382</b>      | 0 | 0        | 0 | 1    | 0.016667  | 0.027774 | 1        | Unclassified | chr11:49346688-49349624   | 0.937   |
| <b>Olfr193</b>       | 0 | 0        | 0 | 0    | 0         | 0.01945  | 0        | Unclassified | chr16:59109504-59112434   | 0.931   |
| <b>Enho</b>          | 0 | 0        | 0 | 14   | 0.233333  | 0.215832 | 1.79845  | Unclassified | chr4:41585176-41589335    | 2.16    |
| <b>Timd4</b>         | 0 | 0        | 0 | 25   | 0.416667  | 0.058926 | 0.596597 | Unclassified | chr11:46622300-46657835   | 33.536  |
| <b>Rab22a</b>        | 0 | 0        | 0 | 800  | 13.333333 | 12.029   | 12.27105 | Unclassified | chr2:173483345-173527683  | 42.339  |
| <b>Cps1</b>          | 0 | 0        | 0 | 55   | 0.916667  | 0.076288 | 0.663308 | Unclassified | chr1:67167639-67277022    | 107.384 |
| <b>Pvr14</b>         | 0 | 36.92194 | 0 | 91   | 1.516667  | 0.955703 | 0.488489 | Unclassified | chr1:173298303-173318418  | 18.116  |
| <b>Slc45a3</b>       | 0 | 0        | 0 | 26   | 0.433333  | 0.080582 | 0.321209 | Unclassified | chr1:133865185-133879541  | 12.357  |
| <b>Defa22</b>        | 0 | 0        | 0 | 0    | 0         | 0        | 0        | Unclassified | chr8:22299955-22302924    | 0.97    |
| <b>Top2b</b>         | 0 | 0        | 0 | 654  | 10.9      | 15.7817  | 37.58876 | Stalled      | chr14:17195719-17263301   | 65.583  |
| <b>Top3b</b>         | 0 | 0        | 0 | 593  | 9.883333  | 10.7008  | 11.54383 | Unclassified | chr16:16868983-16893079   | 22.097  |
| <b>Gulp1</b>         | 0 | 0        | 0 | 87   | 1.45      | 0.017226 | 1.492614 | Unclassified | chr1:44606515-44853681    | 245.167 |
| <b>Morf412</b>       | 0 | 0        | 0 | 371  | 6.183333  | 45.3411  | 14.68631 | Unclassified | chrX:133267489-133278148  | 8.66    |
| <b>Ssca1</b>         | 0 | 0        | 0 | 239  | 3.983333  | 28.3213  | 7.998861 | Unclassified | chr19:5730305-5733721     | 1.417   |
| <b>Rbm12</b>         | 0 | 0        | 0 | 730  | 12.16667  | 0        | 10.12142 | Unclassified | chr2:155920617-155939701  | 17.085  |
| <b>Rnf222</b>        | 0 | 0        | 0 | 10   | 0.166667  | 0.080666 | 0.405823 | Unclassified | chr11:68700054-68708517   | 6.464   |
| <b>Lipt1</b>         | 0 | 0        | 0 | 79   | 1.316667  | 1.7631   | 7.422015 | Unclassified | chr1:37927050-37933143    | 4.094   |
| <b>Frem2</b>         | 0 | 0        | 0 | 129  | 2.15      | 0.065358 | 1.597706 | Unclassified | chr3:53317859-53463277    | 143.419 |
| <b>Abpb</b>          | 0 | 0        | 0 | 2    | 0.033333  | 0        | 0        | Unclassified | chr7:34796950-34800961    | 2.012   |
| <b>Hoxc8</b>         | 0 | 0        | 0 | 5    | 0.083333  | 0.140779 | 2.192463 | Unclassified | chr15:102818969-102824683 | 3.715   |
| <b>Gabbr3</b>        | 0 | 0        | 0 | 69   | 1.15      | 0.061617 | 0        | Unclassified | chr16:59405207-59461565   | 54.359  |
| <b>Igsf9b</b>        | 0 | 0        | 0 | 42   | 0.7       | 0.03999  | 2.413926 | Unclassified | chr9:27104812-27142348    | 35.537  |
| <b>Dopey1</b>        | 0 | 0        | 0 | 500  | 8.333333  | 1.53092  | 27.95826 | Stalled      | chr9:86358760-86449413    | 88.654  |
| <b>Gm813</b>         | 0 | 0        | 0 | 3    | 0.05      | 0        | 0        | Unclassified | chr16:58613798-58619091   | 3.294   |
| <b>Rbm44</b>         | 0 | 0        | 0 | 68   | 1.133333  | 0.375977 | 16.25378 | Stalled      | chr1:93039679-93067372    | 25.694  |
| <b>Ssxb2</b>         | 0 | 0        | 0 | 2    | 0.033333  | 0.002844 | 0        | Unclassified | chrX:8031470-8040852      | 7.383   |
| <b>Lancl3</b>        | 0 | 0        | 0 | 88   | 1.466667  | 0.343294 | 4.373387 | Unclassified | chrX:8775098-8845211      | 68.114  |
| <b>Ssxb9</b>         | 0 | 0        | 0 | 0    | 0         | 0        | 0        | Unclassified | chrX:7942103-7952514      | 8.412   |
| <b>Gm13101</b>       | 0 | 0        | 0 | 1    | 0.016667  | 0.013034 | 0        | Unclassified | chr4:143554422-143558853  | 2.432   |
| <b>E2f7</b>          | 0 | 0        | 0 | 404  | 6.733333  | 2.20295  | 13.97334 | Unclassified | chr10:110180520-110224440 | 41.921  |
| <b>Blvra</b>         | 0 | 0        | 0 | 321  | 5.35      | 8.53144  | 34.9486  | Stalled      | chr2:126894392-126922820  | 26.429  |
| <b>Ltc4s</b>         | 0 | 0        | 0 | 80   | 1.333333  | 5.36193  | 0.103043 | Unclassified | chr11:50049973-50053973   | 2.001   |
| <b>Tmie</b>          | 0 | 0        | 0 | 41   | 0.683333  | 0.231399 | 3.494944 | Unclassified | chr9:110768549-110784587  | 14.039  |
| <b>Lrtm2</b>         | 0 | 0        | 0 | 31   | 0.516667  | 0.187335 | 0.359637 | Unclassified | chr6:119265150-119282751  | 15.602  |
| <b>Sf3b1</b>         | 0 | 0        | 0 | 1260 | 21        | 28.4385  | 24.03272 | Unclassified | chr1:55042012-55086322    | 42.311  |
| <b>Sptlc2</b>        | 0 | 0        | 0 | 552  | 9.2       | 6.03527  | 30.9082  | Stalled      | chr12:88648838-88731180   | 80.343  |
| <b>Bok</b>           | 0 | 0        | 0 | 42   | 0.7       | 0.474347 | 0.662527 | Unclassified | chr1:95580270-95592339    | 10.07   |
| <b>Scyl3</b>         | 0 | 0        | 0 | 624  | 10.4      | 5.38692  | 12.53259 | Unclassified | chr1:165858194-165885257  | 25.064  |
| <b>Gcc2</b>          | 0 | 0        | 0 | 306  | 5.1       | 2.08028  | 45.46701 | Stalled      | chr10:57716273-57768340   | 50.068  |
| <b>Tbc1d13</b>       | 0 | 0        | 0 | 528  | 8.8       | 6.5992   | 24.35047 | Unclassified | chr2:29987390-30007533    | 18.144  |
| <b>Rnf126</b>        | 0 | 0        | 0 | 520  | 8.666667  | 33.2013  | 5.287559 | Unclassified | chr10:79221259-79231666   | 8.408   |
| <b>Zfp867</b>        | 0 | 0        | 0 | 178  | 2.966667  | 1.83295  | 16.19486 | Stalled      | chr11:59274698-59287976   | 11.279  |
| <b>2510049J12Rik</b> | 0 | 0        | 0 | 23   | 0.383333  | 0.337942 | 0.573008 | Unclassified | chr6:115533564-115544594  | 9.031   |
| <b>Topbp1</b>        | 0 | 0        | 0 | 1514 | 25.233333 | 22.0348  | 19.52899 | Unclassified | chr9:103205656-103252757  | 45.102  |
| <b>Slc25a12</b>      | 0 | 0        | 0 | 669  | 11.15     | 9.85234  | 29.66483 | Unclassified | chr2:71112351-71207611    | 93.261  |
| <b>Calcb</b>         | 0 | 0        | 0 | 7    | 0.116667  | 0.093258 | 0.482134 | Unclassified | chr7:121860156-121866879  | 4.724   |
| <b>Oaz3</b>          | 0 | 0        | 0 | 4    | 0.066667  | 0        | 1.101527 | Unclassified | chr3:94237087-94242538    | 3.452   |
| <b>Tmem18</b>        | 0 | 0        | 0 | 260  | 4.333333  | 5.94805  | 18.48079 | Stalled      | chr12:31267307-31276084   | 6.778   |
| <b>V1rc23</b>        | 0 | 0        | 0 | 0    | 0         | 0        | 0        | Unclassified | chr6:57850075-57852984    | 0.91    |
| <b>Igfbp5</b>        | 0 | 0        | 0 | 29   | 0.483333  | 0.13677  | 1.628988 | Unclassified | chr1:72904638-72923439    | 16.802  |
| <b>Slc22a2</b>       | 0 | 0        | 0 | 31   | 0.516667  | 0.017984 | 0        | Unclassified | chr17:12775054-12821354   | 44.301  |
| <b>Vps37a</b>        | 0 | 0        | 0 | 488  | 8.133333  | 2.76367  | 54.23371 | Stalled      | chr8:41595136-41636488    | 39.353  |
| <b>Zfp821</b>        | 0 | 0        | 0 | 292  | 4.866667  | 5.48513  | 6.845498 | Unclassified | chr8:112227987-112248832  | 18.846  |
| <b>Slc1a1</b>        | 0 | 0        | 0 | 110  | 1.833333  | 0.476887 | 8.24712  | Unclassified | chr19:28907655-28988450   | 78.796  |
| <b>Slc1a6</b>        | 0 | 0        | 0 | 23   | 0.383333  | 0.1077   | 0.624519 | Unclassified | chr10:78241246-78277510   | 34.265  |
| <b>Slc1a3</b>        | 0 | 0        | 0 | 74   | 1.233333  | 0.591344 | 0.512469 | Unclassified | chr15:8584125-8662807     | 76.683  |
| <b>Slc22a1</b>       | 0 | 0        | 0 | 30   | 0.5       | 0.09646  | 0.96229  | Unclassified | chr17:12841740-12870704   | 26.965  |
| <b>Gng5</b>          | 0 | 0        | 0 | 446  | 7.433333  | 16.0592  | 6.393648 | Unclassified | chr3:146160799-146168507  | 5.709   |
| <b>Trpv5</b>         | 0 | 0        | 0 | 11   | 0.183333  | 0.019717 | 0.749687 | Unclassified | chr6:41602768-41632722    | 27.955  |
| <b>Moxd2</b>         | 0 | 0        | 0 | 7    | 0.116667  | 0.013781 | 0.562108 | Unclassified | chr6:40828792-40839493    | 8.702   |
| <b>Rfesd</b>         | 0 | 0        | 0 | 525  | 8.75      | 9.05838  | 88.23224 | Stalled      | chr13:76138982-76158010   | 17.029  |
| <b>Myh14</b>         | 0 | 0        | 0 | 151  | 2.516667  | 0.149769 | 0.855945 | Unclassified | chr7:51861189-51922873    | 59.685  |
| <b>Barx2</b>         | 0 | 0        | 0 | 73   | 1.216667  | 0.193211 | 0.986912 | Unclassified | chr9:31653628-31722870    | 67.243  |
| <b>Pcolce</b>        | 0 | 0        | 0 | 62   | 1.033333  | 0.332877 | 1.032964 | Unclassified | chr5:138046334-138054632  | 6.299   |
| <b>Miki</b>          | 0 | 0        | 0 | 261  | 4.35      | 4.53315  | 8.034391 | Unclassified | chr8:113835699-113863803  | 26.105  |

|                      |   |   |   |      |          |          |          |              |                           |         |
|----------------------|---|---|---|------|----------|----------|----------|--------------|---------------------------|---------|
| <b>Btnl7</b>         | 0 | 0 | 0 | 11   | 0.183333 | 0.136811 | 0.604656 | Unclassified | chr17:34669821-34686585   | 14.765  |
| <b>Pgap2</b>         | 0 | 0 | 0 | 376  | 6.266667 | 6.26587  | 2.00873  | Elongating   | chr7:109369587-109386265  | 14.679  |
| <b>Nbeal1</b>        | 0 | 0 | 0 | 337  | 5.616667 | 0.310082 | 65.7255  | Stalled      | chr1:60235442-60391549    | 154.108 |
| <b>VepH1</b>         | 0 | 0 | 0 | 160  | 2.666667 | 0.04984  | 1.208006 | Unclassified | chr3:65858749-66102741    | 241.993 |
| <b>Rabl5</b>         | 0 | 0 | 0 | 61   | 1.016667 | 11.1394  | 3.465313 | Unclassified | chr5:137382019-137389114  | 5.096   |
| <b>Gclm</b>          | 0 | 0 | 0 | 372  | 6.2      | 11.8553  | 23.49184 | Unclassified | chr3:121946509-121969566  | 21.058  |
| <b>V1re2</b>         | 0 | 0 | 0 | 1    | 0.016667 | 0        | 1        | Unclassified | chr17:20822471-20825368   | 0.898   |
| <b>V1re1</b>         | 0 | 0 | 0 | 0    | 0        | 0.041747 | 0        | Unclassified | chr17:20949458-20952379   | 0.922   |
| <b>V1re4</b>         | 0 | 0 | 0 | 1    | 0.016667 | 0        | 1        | Unclassified | chr17:21050170-21053327   | 1.158   |
| <b>V1re3</b>         | 0 | 0 | 0 | 2    | 0.033333 | 0        | 0        | Unclassified | chr17:20913022-20916465   | 1.444   |
| <b>V1re6</b>         | 0 | 0 | 0 | 1    | 0.016667 | 0.024959 | 0        | Unclassified | chr17:20870063-20873090   | 1.028   |
| <b>V1re5</b>         | 0 | 0 | 0 | 0    | 0        | 0.028576 | 0        | Unclassified | chr17:20637262-20640159   | 0.898   |
| <b>Paip1</b>         | 0 | 0 | 0 | 488  | 8.133333 | 3.64558  | 16.76348 | Unclassified | chr13:120215406-120249127 | 31.722  |
| <b>Tnfrsf23</b>      | 0 | 0 | 0 | 90   | 1.5      | 0.787397 | 32.3597  | Stalled      | chr7:150851711-150873777  | 20.067  |
| <b>Ffar2</b>         | 0 | 0 | 0 | 74   | 1.233333 | 6.43537  | 0.318352 | Unclassified | chr7:31603375-31610794    | 5.42    |
| <b>Praf2</b>         | 0 | 0 | 0 | 125  | 2.083333 | 6.9483   | 20.53403 | Stalled      | chrX:7303696-7308189      | 2.494   |
| <b>Wdr45</b>         | 0 | 0 | 0 | 137  | 2.283333 | 6.53781  | 7.858443 | Unclassified | chrX:7297374-7305327      | 5.954   |
| <b>Fpr1</b>          | 0 | 0 | 0 | 6    | 0.1      | 0.174372 | 0.617956 | Unclassified | chr17:18013434-18022903   | 7.47    |
| <b>Magix</b>         | 0 | 0 | 0 | 132  | 2.2      | 0.544305 | 0.050575 | Unclassified | chrX:7250291-7260215      | 7.925   |
| <b>Fpr3</b>          | 0 | 0 | 0 | 0    | 0        | 0        | 0        | Unclassified | chr17:18105421-18108641   | 1.221   |
| <b>Fxn</b>           | 0 | 0 | 0 | 448  | 7.466667 | 9.57859  | 17.42619 | Unclassified | chr19:24335942-24357076   | 19.135  |
| <b>Prickle3</b>      | 0 | 0 | 0 | 267  | 4.45     | 3.90713  | 0.375333 | Unclassified | chrX:7233658-7245312      | 9.655   |
| <b>Obp1a</b>         | 0 | 0 | 0 | 2    | 0.033333 | 0        | 0.829671 | Unclassified | chrX:75330843-75338713    | 5.871   |
| <b>Senp1</b>         | 0 | 0 | 0 | 1074 | 17.9     | 4.96106  | 26.98586 | Unclassified | chr15:97871659-97925836   | 52.178  |
| <b>Ccdc22</b>        | 0 | 0 | 0 | 72   | 1.2      | 0        | 2.628078 | Unclassified | chrX:7170934-7184546      | 11.613  |
| <b>Lin54</b>         | 0 | 0 | 0 | 817  | 13.61667 | 3.52303  | 5.07862  | Unclassified | chr5:100871057-100931658  | 58.602  |
| <b>Sdc2</b>          | 0 | 0 | 0 | 50   | 0.833333 | 0.021263 | 0.697531 | Unclassified | chr15:32848477-32964476   | 114     |
| <b>4933407P14Rik</b> | 0 | 0 | 0 | 15   | 0.25     | 0.167356 | 1.19648  | Unclassified | chr11:104045640-104052480 | 4.841   |
| <b>Trfr2</b>         | 0 | 0 | 0 | 53   | 0.883333 | 0.451034 | 3.230541 | Unclassified | chr5:138009078-138028709  | 17.632  |
| <b>Mael</b>          | 0 | 0 | 0 | 12   | 0.2      | 0.03316  | 0.767741 | Unclassified | chr1:168131515-168170875  | 37.361  |
| <b>Wee2</b>          | 0 | 0 | 0 | 24   | 0.4      | 0.057731 | 1.044456 | Unclassified | chr6:40390861-40416814    | 23.954  |
| <b>Olf1097</b>       | 0 | 0 | 0 | 1    | 0.016667 | 0.041952 | 0        | Unclassified | chr2:86730383-86734320    | 1.938   |
| <b>Atp7b</b>         | 0 | 0 | 0 | 315  | 5.25     | 0.718064 | 3.725824 | Unclassified | chr8:23104819-23172546    | 65.728  |
| <b>Gm11541</b>       | 0 | 0 | 0 | 91   | 1.516667 | 0.030497 | 0.281335 | Unclassified | chr11:94555811-94567813   | 10.003  |
| <b>Adam26a</b>       | 0 | 0 | 0 | 0    | 0        | 0.003625 | 0        | Unclassified | chr8:44653629-44664061    | 8.433   |
| <b>Slc4a11</b>       | 0 | 0 | 0 | 173  | 2.883333 | 0.300289 | 1.46114  | Elongating   | chr2:130509843-130525255  | 13.413  |
| <b>Marcks1</b>       | 0 | 0 | 0 | 488  | 8.133333 | 99.3031  | 4.315929 | Unclassified | chr4:129188824-129193225  | 2.402   |
| <b>Kif6</b>          | 0 | 0 | 0 | 308  | 5.133333 | 0.23966  | 1.474092 | Unclassified | chr17:49752496-50049172   | 294.677 |
| <b>Itpril2</b>       | 0 | 0 | 0 | 54   | 0.9      | 0.591689 | 6.34912  | Unclassified | chr7:125628625-125637489  | 6.865   |
| <b>Casc4</b>         | 0 | 0 | 0 | 362  | 6.033333 | 2.85917  | 50.26091 | Stalled      | chr2:121690705-121761943  | 69.239  |
| <b>V1rc29</b>        | 0 | 0 | 0 | 0    | 0        | 0.019834 | 0        | Unclassified | chr6:57272717-57275629    | 0.913   |
| <b>Abpz</b>          | 0 | 0 | 0 | 5    | 0.083333 | 0        | 0.269006 | Unclassified | chr7:34522211-34526314    | 2.104   |
| <b>Slc1a7</b>        | 0 | 0 | 0 | 83   | 1.383333 | 0.034154 | 1.067586 | Unclassified | chr4:107638938-107686134  | 45.197  |
| <b>Cdcp2</b>         | 0 | 0 | 0 | 18   | 0.3      | 0.009817 | 0        | Unclassified | chr4:106767495-106780353  | 10.859  |
| <b>Aard</b>          | 0 | 0 | 0 | 4    | 0.066667 | 0.123335 | 0.697794 | Unclassified | chr15:51869652-51877269   | 5.618   |
| <b>Serpine2</b>      | 0 | 0 | 0 | 81   | 1.35     | 0.918438 | 3.744146 | Unclassified | chr1:79790898-79857240    | 64.343  |
| <b>Tm4sf4</b>        | 0 | 0 | 0 | 12   | 0.2      | 0.036802 | 0.604149 | Unclassified | chr3:57227331-57245592    | 16.262  |
| <b>Taar7d</b>        | 0 | 0 | 0 | 3    | 0.05     | 0.014348 | 0        | Unclassified | chr10:23745027-23748104   | 1.078   |
| <b>Taar7f</b>        | 0 | 0 | 0 | 0    | 0        | 0.0119   | 0        | Unclassified | chr10:23767315-23770392   | 1.078   |
| <b>Slc26a8</b>       | 0 | 0 | 0 | 69   | 1.15     | 0.40051  | 0.816482 | Unclassified | chr17:28786610-28828932   | 40.323  |
| <b>Tm9sf3</b>        | 0 | 0 | 0 | 1407 | 23.45    | 17.4391  | 20.0168  | Unclassified | chr19:41285331-41340494   | 53.164  |
| <b>Olf1098</b>       | 0 | 0 | 0 | 1    | 0.016667 | 0        | 0        | Unclassified | chr2:86762739-86765687    | 0.949   |
| <b>Slc44a1</b>       | 0 | 0 | 0 | 560  | 9.333333 | 2.24197  | 59.00711 | Stalled      | chr4:53451284-53635350    | 182.067 |
| <b>Lgi4</b>          | 0 | 0 | 0 | 28   | 0.466667 | 0.059542 | 0.322624 | Unclassified | chr7:31842953-31855954    | 11.002  |
| <b>Popdc3</b>        | 0 | 0 | 0 | 13   | 0.216667 | 0.096936 | 0.701098 | Unclassified | chr10:45007110-45038256   | 29.147  |
| <b>Olf10</b>         | 0 | 0 | 0 | 0    | 0        | 0.016476 | 0        | Unclassified | chr11:49129049-49131985   | 0.937   |
| <b>Gap43</b>         | 0 | 0 | 0 | 71   | 1.183333 | 0.226576 | 1.145149 | Unclassified | chr16:42248673-42342764   | 92.092  |
| <b>Mfsd8</b>         | 0 | 0 | 0 | 451  | 7.516667 | 2.00918  | 6.251712 | Unclassified | chr3:40622093-40652776    | 28.684  |
| <b>Ggt7</b>          | 0 | 0 | 0 | 44   | 0.733333 | 0.250338 | 3.266931 | Unclassified | chr2:155316115-155342582  | 24.468  |
| <b>Shq1</b>          | 0 | 0 | 0 | 593  | 9.883333 | 7.74686  | 25.8342  | Stalled      | chr6:100523075-100623151  | 98.077  |
| <b>Lamp3</b>         | 0 | 0 | 0 | 22   | 0.366667 | 0.733435 | 2.971223 | Unclassified | chr16:19653473-19708458   | 52.986  |
| <b>Spink11</b>       | 0 | 0 | 0 | 2    | 0.033333 | 0        | 0        | Unclassified | chr18:44349698-44357831   | 6.134   |
| <b>Spink6</b>        | 0 | 0 | 0 | 3    | 0.05     | 0.087334 | 0        | Unclassified | chr18:44229046-44243264   | 12.219  |
| <b>Rpl17</b>         | 0 | 0 | 0 | 751  | 12.51667 | 0        | 4.064348 | Unclassified | chr18:75158130-75163035   | 2.906   |
| <b>Grxcr2</b>        | 0 | 0 | 0 | 11   | 0.183333 | 0.022886 | 0.542334 | Unclassified | chr18:42145854-42160703   | 12.85   |
| <b>Ube2a</b>         | 0 | 0 | 0 | 283  | 4.716667 | 10.1803  | 23.13503 | Unclassified | chrX:34412360-34424215    | 9.856   |
| <b>4930415L06Rik</b> | 0 | 0 | 0 | 0    | 0        | 0        | 0        | Unclassified | chrX:87175435-87180190    | 2.756   |
| <b>Uba1</b>          | 0 | 0 | 0 | 516  | 8.6      | 79.2517  | 7.312644 | Unclassified | chrX:20238080-20260305    | 20.226  |
| <b>Uba3</b>          | 0 | 0 | 0 | 322  | 5.366667 | 9.48579  | 18.12387 | Unclassified | chr6:97133809-97157636    | 21.828  |
| <b>Nae1</b>          | 0 | 0 | 0 | 297  | 4.95     | 4.89621  | 25.93042 | Stalled      | chr8:107034929-107060537  | 23.609  |
| <b>Ocln</b>          | 0 | 0 | 0 | 47   | 0.783333 | 0.108409 | 1.126211 | Unclassified | chr13:101267321-101324453 | 55.133  |
| <b>Enpep</b>         | 0 | 0 | 0 | 59   | 0.983333 | 0.173605 | 0        | Unclassified | chr3:128972094-129037667  | 63.574  |
| <b>Krt26</b>         | 0 | 0 | 0 | 13   | 0.216667 | 0        | 1.376887 | Unclassified | chr11:99189797-99201279   | 9.483   |
| <b>Kpna7</b>         | 0 | 0 | 0 | 26   | 0.433333 | 0.057012 | 0        | Unclassified | chr5:145744612-145772505  | 25.894  |
| <b>Zfp418</b>        | 0 | 0 | 0 | 33   | 0.55     | 1.89819  | 5.165621 | Unclassified | chr7:7122063-7136271      | 12.209  |
| <b>Zfp772</b>        | 0 | 0 | 0 | 8    | 0.133333 | 2.431    | 0.534089 | Unclassified | chr7:7154832-7164709      | 7.878   |
| <b>Enam</b>          | 0 | 0 | 0 | 22   | 0.366667 | 0.065366 | 0        | Unclassified | chr5:88914999-88935074    | 18.076  |
| <b>5730403M16Rik</b> | 0 | 0 | 0 | 138  | 2.3      | 7.06046  | 9.371968 | Unclassified | chr7:7067393-7076187      | 6.795   |
| <b>Enc1</b>          | 0 | 0 | 0 | 219  | 3.65     | 1.1892   | 24.63227 | Stalled      | chr13:98009059-98022994   | 11.936  |
| <b>Wnk4</b>          | 0 | 0 | 0 | 298  | 4.966667 | 0.58398  | 11.79323 | Unclassified | chr11:101119880-101138723 | 16.844  |
| <b>BC080695</b>      | 0 | 0 | 0 | 1    | 0.016667 | 0        | 0        | Unclassified | chr4:143155369-143163701  | 6.333   |
| <b>Cyp4a29</b>       | 0 | 0 | 0 | 7    | 0.116667 | 0.108857 | 0.656652 | Unclassified | chr4:114912688-114927162  | 12.475  |
| <b>Olf1234</b>       | 0 | 0 | 0 | 4    | 0.066667 | 0        | 3        | Unclassified | chr15:98325904-98328837   | 0.934   |
| <b>Fam164c</b>       | 0 | 0 | 0 | 109  | 1.816667 | 0.171571 | 1.439879 | Unclassified | chr12:86627540-86640308   | 10.769  |
| <b>Cd226</b>         | 0 | 0 | 0 | 35   | 0.583333 | 0.036073 | 0.678948 | Unclassified | chr18:89364818-89439719   | 72.902  |
| <b>Gm13109</b>       | 0 | 0 | 0 | 1    | 0.016667 | 0        | 0        | Unclassified | chr4:143538484-143542919  | 2.436   |

|               |   |   |   |      |          |          |          |              |                           |         |
|---------------|---|---|---|------|----------|----------|----------|--------------|---------------------------|---------|
| 2210016L21Rik | 0 | 0 | 0 | 234  | 3.9      | 23.2005  | 7.924528 | Unclassified | chr5:115390210-115398549  | 6.34    |
| Zmat2         | 0 | 0 | 0 | 279  | 4.65     | 35.1354  | 9.938294 | Unclassified | chr18:36951576-36959314   | 5.739   |
| Gm11563       | 0 | 0 | 0 | 2    | 0.033333 | 0        | 2        | Unclassified | chr11:99519255-99522273   | 1.019   |
| Casp12        | 0 | 0 | 0 | 4    | 0.066667 | 0.0246   | 0.898512 | Unclassified | chr9:5343475-5373034      | 27.56   |
| Tlr11         | 0 | 0 | 0 | 1    | 0.016667 | 0.016213 | 0        | Unclassified | chr14:50978176-50983338   | 3.163   |
| Olfr97        | 0 | 0 | 0 | 0    | 0        | 0.191987 | 0        | Unclassified | chr17:37368380-37371313   | 0.934   |
| Nefm          | 0 | 0 | 0 | 6    | 0.1      | 0.126973 | 0        | Unclassified | chr14:68737601-68745061   | 5.461   |
| Grasp         | 0 | 0 | 0 | 185  | 3.083333 | 2.90711  | 12.90159 | Stalled      | chr15:101052637-101063187 | 8.551   |
| Tepp          | 0 | 0 | 0 | 18   | 0.3      | 0.529344 | 0        | Unclassified | chr8:97833414-97845228    | 9.815   |
| Lypla1        | 0 | 0 | 0 | 66   | 1.1      | 2.67357  | 22.16363 | Stalled      | chr1:187911610-187943189  | 29.58   |
| Zbtb20        | 0 | 0 | 0 | 4302 | 71.7     | 2.70861  | 0.079426 | Unclassified | chr16:43245396-43619223   | 371.828 |
| Polr2l        | 0 | 0 | 0 | 224  | 3.733333 | 17.6922  | 4.371744 | Unclassified | chr7:148657758-148663052  | 3.295   |
| Gosr2         | 0 | 0 | 0 | 804  | 13.4     | 20.4673  | 14.73108 | Unclassified | chr11:103538163-103561024 | 20.862  |
| Tspan6        | 0 | 0 | 0 | 10   | 0.166667 | 0.748164 | 6.049042 | Unclassified | chrX:130425608-130434968  | 7.361   |
| Olfr323       | 0 | 0 | 0 | 1    | 0.016667 | 0.026371 | 0        | Unclassified | chr11:58438574-58441546   | 0.973   |
| Olfr918       | 0 | 0 | 0 | 0    | 0        | 0.052356 | 0        | Unclassified | chr9:38480088-38483066    | 0.979   |
| Olfr368       | 0 | 0 | 0 | 3    | 0.05     | 0.052099 | 2        | Unclassified | chr2:37185268-37188252    | 0.985   |
| Olfr654       | 0 | 0 | 0 | 1    | 0.016667 | 0.049966 | 1        | Unclassified | chr7:111734268-111737294  | 1.027   |
| Fam176b       | 0 | 0 | 0 | 46   | 0.766667 | 7.8228   | 0.501892 | Unclassified | chr4:125823246-125827118  | 1.873   |
| Olfr794       | 0 | 0 | 0 | 0    | 0        | 0        | 0        | Unclassified | chr10:129005712-129008675 | 0.964   |
| Olfr127       | 0 | 0 | 0 | 0    | 0        | 0.010848 | 0        | Unclassified | chr17:38038492-38041464   | 0.973   |
| Olfr1255      | 0 | 0 | 0 | 2    | 0.033333 | 0.044003 | 0        | Unclassified | chr2:89654484-89657417    | 0.934   |
| Olfr1284      | 0 | 0 | 0 | 0    | 0        | 0        | 0        | Unclassified | chr2:111217158-111220094  | 0.937   |
| Olfr593       | 0 | 0 | 0 | 0    | 0        | 0        | 0        | Unclassified | chr7:110358375-110361359  | 0.985   |
| Adh7          | 0 | 0 | 0 | 20   | 0.333333 | 0        | 0.424387 | Unclassified | chr3:137878736-137895006  | 14.271  |
| Lilrb3        | 0 | 0 | 0 | 37   | 0.616667 | 1.87349  | 0.884668 | Unclassified | chr7:3664106-3673984      | 7.879   |
| Nfyc          | 0 | 0 | 0 | 1342 | 22.36667 | 8.23182  | 29.43135 | Unclassified | chr4:120430039-120500320  | 68.282  |
| C330005M16Rik | 0 | 0 | 0 | 28   | 0.466667 | 0.073312 | 2.521406 | Unclassified | chr7:29392655-29418034    | 23.38   |
| B3gat2        | 0 | 0 | 0 | 162  | 2.7      | 0.954458 | 1.057559 | Unclassified | chr1:23766764-23854697    | 85.934  |
| Ripply2       | 0 | 0 | 0 | 8    | 0.133333 | 0.051061 | 3.141609 | Unclassified | chr9:86908371-86914751    | 4.381   |
| Omt2b         | 0 | 0 | 0 | 0    | 0        | 0.052229 | 0        | Unclassified | chr9:78173836-78177427    | 1.592   |
| Tra2a         | 0 | 0 | 0 | 631  | 10.51667 | 28.5331  | 20.58002 | Unclassified | chr6:49193919-49216051    | 20.133  |
| Slc10a5       | 0 | 0 | 0 | 11   | 0.183333 | 0.07514  | 0.369006 | Unclassified | chr3:10331733-10337656    | 3.924   |
| Ii1a          | 0 | 0 | 0 | 17   | 0.283333 | 0.129851 | 0.384338 | Unclassified | chr2:129125345-129137708  | 10.364  |
| Ifitm6        | 0 | 0 | 0 | 2    | 0.033333 | 0.04738  | 2        | Unclassified | chr7:148201710-148204791  | 1.082   |
| Ngf           | 0 | 0 | 0 | 67   | 1.116667 | 0.036273 | 0.909953 | Unclassified | chr3:102271850-102324936  | 51.087  |
| Olfr1273      | 0 | 0 | 0 | 0    | 0        | 0        | 0        | Unclassified | chr2:90136092-90139016    | 0.925   |
| Olfr1262      | 0 | 0 | 0 | 0    | 0        | 0.034967 | 0        | Unclassified | chr2:89840564-89843479    | 0.916   |
| Clvs2         | 0 | 0 | 0 | 34   | 0.566667 | 0.030759 | 0.771259 | Unclassified | chr10:33232139-33346406   | 112.268 |
| Mrps10        | 0 | 0 | 0 | 440  | 7.333333 | 18.9685  | 6.7422   | Unclassified | chr17:47503835-47515627   | 9.793   |
| Fgf23         | 0 | 0 | 0 | 72   | 1.2      | 2.52817  | 0.096867 | Unclassified | chr6:127020919-127031426  | 8.508   |
| Mrps22        | 0 | 0 | 0 | 413  | 6.883333 | 8.39835  | 5.953551 | Unclassified | chr9:98489151-98504098    | 12.948  |
| Olfr145       | 0 | 0 | 0 | 3    | 0.05     | 0.061799 | 2        | Unclassified | chr9:37702990-37705923    | 0.934   |
| Olfr1242      | 0 | 0 | 0 | 2    | 0.033333 | 0        | 1        | Unclassified | chr2:89333546-89336467    | 0.922   |
| Arhgef7       | 0 | 0 | 0 | 1405 | 23.41667 | 8.43375  | 26.32867 | Unclassified | chr8:11756329-11835217    | 76.889  |
| Matn2         | 0 | 0 | 0 | 216  | 3.6      | 0.2368   | 1.135828 | Unclassified | chr15:34234435-34366595   | 129.561 |
| Matn4         | 0 | 0 | 0 | 36   | 0.6      | 0.736031 | 0.953662 | Unclassified | chr2:164215134-164232114  | 14.981  |
| Olfr1231      | 0 | 0 | 0 | 2    | 0.033333 | 0.027211 | 0        | Unclassified | chr2:89142806-89145747    | 0.942   |
| Ogfr1         | 0 | 0 | 0 | 136  | 2.266667 | 2.68084  | 10.35032 | Stalled      | chr1:23373262-23392014    | 16.753  |
| Tmprss3       | 0 | 0 | 0 | 17   | 0.283333 | 0.025758 | 0.538234 | Unclassified | chr17:31316211-31336694   | 18.484  |
| Trim29        | 0 | 0 | 0 | 50   | 0.833333 | 0.045287 | 0.332097 | Unclassified | chr9:43116845-43144208    | 25.364  |
| Phf11         | 0 | 0 | 0 | 64   | 1.066667 | 2.40028  | 7.002191 | Unclassified | chr14:59895751-59918359   | 20.609  |
| Alb           | 0 | 0 | 0 | 11   | 0.183333 | 0.05646  | 1.241019 | Unclassified | chr5:90887914-90905629    | 15.716  |
| Defb3         | 0 | 0 | 0 | 1    | 0.016667 | 0        | 0        | Unclassified | chr8:19291360-19295339    | 1.98    |
| Sytl4         | 0 | 0 | 0 | 18   | 0.3      | 0.034416 | 0        | Unclassified | chrX:130470923-130518322  | 45.4    |
| Zdhhc20       | 0 | 0 | 0 | 708  | 11.8     | 5.71537  | 17.72718 | Unclassified | chr14:58451538-58511099   | 57.562  |
| Insl6         | 0 | 0 | 0 | 59   | 0.983333 | 7.59108  | 3.655241 | Unclassified | chr19:29395843-29401808   | 3.966   |
| Mterf         | 0 | 0 | 0 | 15   | 0.25     | 1.29234  | 0.381091 | Unclassified | chr5:3890580-3895933      | 3.354   |
| Sox2          | 0 | 0 | 0 | 7    | 0.116667 | 0.062621 | 0.653803 | Unclassified | chr3:34546926-34551382    | 2.457   |
| Ttc21b        | 0 | 0 | 0 | 213  | 3.55     | 1.85295  | 31.75908 | Stalled      | chr2:66022385-66096674    | 72.29   |
| Gm2012        | 0 | 0 | 0 | 20   | 0.333333 | 0        | 0        | Unclassified | chrX:25628008-26364795    | 734.788 |
| Mtap7         | 0 | 0 | 0 | 430  | 7.166667 | 3.90188  | 2.430844 | Unclassified | chr10:19866725-20001396   | 132.672 |
| Snx4          | 0 | 0 | 0 | 540  | 9        | 10.6821  | 21.14471 | Unclassified | chr16:33249541-33299648   | 48.108  |
| Arhgap6       | 0 | 0 | 0 | 219  | 3.65     | 1.83414  | 0.700829 | Unclassified | chrX:165231030-165742367  | 509.338 |
| Maneal        | 0 | 0 | 0 | 355  | 5.916667 | 0.272588 | 0.102921 | Unclassified | chr4:124532482-124541415  | 6.934   |
| Commd7        | 0 | 0 | 0 | 295  | 4.916667 | 6.56773  | 22.35529 | Unclassified | chr2:153444569-153460467  | 13.899  |
| 1810030007Rik | 0 | 0 | 0 | 310  | 5.166667 | 7.57362  | 21.61234 | Unclassified | chrX:12232009-12252672    | 18.664  |
| Sox4          | 0 | 0 | 0 | 34   | 0.566667 | 3.2816   | 3.389264 | Unclassified | chr13:29042598-29047551   | 2.954   |
| Dpp8          | 0 | 0 | 0 | 957  | 15.95    | 9.89472  | 19.88779 | Unclassified | chr9:64878264-64930458    | 50.195  |
| Mr1           | 0 | 0 | 0 | 81   | 1.35     | 2.70192  | 2.422602 | Unclassified | chr1:156975007-156995910  | 18.904  |
| Mudeng        | 0 | 0 | 0 | 372  | 6.2      | 3.75877  | 52.71597 | Stalled      | chr14:49684169-49707398   | 21.23   |
| 4932438H23Rik | 0 | 0 | 0 | 28   | 0.466667 | 0.133702 | 0.353427 | Unclassified | chr16:91054179-91071390   | 15.212  |
| Rif1          | 0 | 0 | 0 | 634  | 10.56667 | 3.81033  | 9.488745 | Unclassified | chr2:51926356-51977901    | 49.546  |
| Gprn3         | 0 | 0 | 0 | 214  | 3.566667 | 0.429852 | 8.965382 | Unclassified | chr6:59302454-59378284    | 73.831  |
| Gm5936        | 0 | 0 | 0 | 3    | 0.05     | 0.012132 | 0        | Unclassified | chrX:72080534-72088694    | 6.161   |
| Olfr381       | 0 | 0 | 0 | 1    | 0.016667 | 0.030202 | 1        | Unclassified | chr11:73299388-73302324   | 0.937   |
| Olfr385       | 0 | 0 | 0 | 1    | 0.016667 | 0        | 1        | Unclassified | chr11:73402299-73405238   | 0.94    |
| Olfr378       | 0 | 0 | 0 | 1    | 0.016667 | 0.013562 | 1        | Unclassified | chr11:73238538-73241483   | 0.946   |
| Olfr532       | 0 | 0 | 0 | 0    | 0        | 0.034403 | 0        | Unclassified | chr7:147604740-147607670  | 0.931   |
| Snora74a      | 0 | 0 | 0 | 194  | 3.233333 | 2.911    | 123      | Unclassified | chr18:35714683-35716881   | 0.199   |
| Vwa3a         | 0 | 0 | 0 | 97   | 1.616667 | 0.050436 | 4.999371 | Unclassified | chr7:127881070-127949054  | 65.985  |
| Amacr         | 0 | 0 | 0 | 298  | 4.966667 | 3.56714  | 70.07254 | Stalled      | chr15:10909510-10926379   | 14.87   |
| Sh3bgrl       | 0 | 0 | 0 | 262  | 4.366667 | 7.90965  | 11.12625 | Stalled      | chrX:106288745-106357806  | 67.062  |
| Tax1bp1       | 0 | 0 | 0 | 627  | 10.45    | 12.2284  | 28.59958 | Unclassified | chr6:52661722-52716771    | 53.05   |
| Tdo2          | 0 | 0 | 0 | 42   | 0.7      | 0.117725 | 1.55937  | Unclassified | chr3:81762335-81781650    | 17.316  |
| Olfr1057      | 0 | 0 | 0 | 1    | 0.016667 | 0.040909 | 1        | Unclassified | chr2:86214619-86217567    | 0.949   |



|                      |   |   |   |      |           |          |          |              |                           |          |
|----------------------|---|---|---|------|-----------|----------|----------|--------------|---------------------------|----------|
| <b>Melk</b>          | 0 | 0 | 0 | 599  | 9.983333  | 7.12861  | 11.05331 | Unclassified | chr4:44311788-44377547    | 63.76    |
| <b>Ccny11</b>        | 0 | 0 | 0 | 422  | 7.033333  | 0.715222 | 44.73587 | Stalled      | chr1:64735918-64772216    | 34.299   |
| <b>Gab1</b>          | 0 | 0 | 0 | 131  | 2.183333  | 0.60915  | 2.875612 | Unclassified | chr8:83288332-83406378    | 116.047  |
| <b>Ssr1</b>          | 0 | 0 | 0 | 1154 | 19.233333 | 13.1795  | 7.836333 | Unclassified | chr13:38063269-38088059   | 22.791   |
| <b>Lgr4</b>          | 0 | 0 | 0 | 125  | 2.083333  | 0.848512 | 22.32246 | Stalled      | chr2:109755803-109854414  | 96.612   |
| <b>Hyal2</b>         | 0 | 0 | 0 | 107  | 1.783333  | 4.10903  | 7.253269 | Unclassified | chr9:107469493-107475109  | 3.617    |
| <b>Ccdc108</b>       | 0 | 0 | 0 | 45   | 0.75      | 0.066119 | 2.273528 | Unclassified | chr1:74948653-74984173    | 33.521   |
| <b>Gm7276</b>        | 0 | 0 | 0 | 12   | 0.2       | 0.742689 | 0.53937  | Unclassified | chr18:77423007-77427102   | 2.096    |
| <b>Rhoc4f</b>        | 0 | 0 | 0 | 1    | 0.016667  | 0        | 1        | Unclassified | chrX:35017401-35024193    | 4.793    |
| <b>Cav1</b>          | 0 | 0 | 0 | 31   | 0.516667  | 0.082453 | 2.265395 | Unclassified | chr6:17254369-17291324    | 34.956   |
| <b>Ctnna1</b>        | 0 | 0 | 0 | 423  | 7.05      | 4.69704  | 15.67993 | Stalled      | chr18:35276565-35414429   | 135.865  |
| <b>5730507C01Rik</b> | 0 | 0 | 0 | 9    | 0.15      | 0        | 0.797628 | Unclassified | chr12:18519351-18542057   | 20.707   |
| <b>Ctnna2</b>        | 0 | 0 | 0 | 522  | 8.7       | 0.064307 | 0.678423 | Unclassified | chr6:76831630-77931661    | 1098.032 |
| <b>Boll</b>          | 0 | 0 | 0 | 89   | 1.483333  | 0.357195 | 18.38502 | Stalled      | chr1:55356912-55422313    | 63.402   |
| <b>Cyp4f14</b>       | 0 | 0 | 0 | 14   | 0.233333  | 0.153739 | 1.000454 | Unclassified | chr17:33042014-33056023   | 12.01    |
| <b>Csta</b>          | 0 | 0 | 0 | 10   | 0.166667  | 0.009386 | 0        | Unclassified | chr16:36120031-36133275   | 11.245   |
| <b>Gm11428</b>       | 0 | 0 | 0 | 7    | 0.116667  | 0.546538 | 0.864769 | Unclassified | chr11:83515557-83519771   | 2.215    |
| <b>Ms4a4c</b>        | 0 | 0 | 0 | 28   | 0.466667  | 0.20364  | 1.831765 | Unclassified | chr19:11480150-11501735   | 19.586   |
| <b>Ms4a8a</b>        | 0 | 0 | 0 | 16   | 0.266667  | 0.059225 | 0.474356 | Unclassified | chr19:11141960-11157593   | 13.634   |
| <b>Cpt1c</b>         | 0 | 0 | 0 | 382  | 6.366667  | 0.575565 | 23.5303  | Stalled      | chr7:52214742-52232144    | 15.403   |
| <b>Lrrc14b</b>       | 0 | 0 | 0 | 204  | 3.4       | 0.667234 | 1.219251 | Elongating   | chr13:74497029-74503448   | 4.42     |
| <b>Rp11</b>          | 0 | 0 | 0 | 53   | 0.883333  | 0.049248 | 0.440034 | Unclassified | chr14:64609267-64652343   | 41.077   |
| <b>Cyp3a44</b>       | 0 | 0 | 0 | 9    | 0.15      | 0.035487 | 0        | Unclassified | chr5:146585558-146619450  | 31.893   |
| <b>Cyp2c70</b>       | 0 | 0 | 0 | 18   | 0.3       | 0.074993 | 1.345964 | Unclassified | chr19:40227850-40263776   | 33.927   |
| <b>Gm94</b>          | 0 | 0 | 0 | 11   | 0.183333  | 0        | 0.594879 | Unclassified | chr18:43936849-43954532   | 15.684   |
| <b>Pax3</b>          | 0 | 0 | 0 | 83   | 1.383333  | 0.149104 | 2.247183 | Unclassified | chr1:78097841-78195711    | 95.871   |
| <b>Prima1</b>        | 0 | 0 | 0 | 77   | 1.283333  | 0        | 0.367931 | Unclassified | chr12:104435117-104482356 | 45.24    |
| <b>Lpcat2</b>        | 0 | 0 | 0 | 91   | 1.516667  | 0.988561 | 8.71815  | Unclassified | chr8:95377248-95443178    | 63.931   |
| <b>Stx19</b>         | 0 | 0 | 0 | 22   | 0.366667  | 0        | 0.844139 | Unclassified | chr16:62812501-62822548   | 8.048    |
| <b>Mrgprf</b>        | 0 | 0 | 0 | 14   | 0.233333  | 0.019167 | 0.820375 | Unclassified | chr7:152484813-152495462  | 8.65     |
| <b>Mrgprd</b>        | 0 | 0 | 0 | 9    | 0.15      | 0        | 0.54026  | Unclassified | chr7:152498739-152509964  | 9.226    |
| <b>Nrn1</b>          | 0 | 0 | 0 | 17   | 0.283333  | 0.289271 | 0.831652 | Unclassified | chr13:36817494-36828323   | 8.83     |
| <b>Gpr177</b>        | 0 | 0 | 0 | 126  | 2.1       | 0        | 12.32921 | Stalled      | chr3:159500658-159598042  | 95.385   |
| <b>G6pc3</b>         | 0 | 0 | 0 | 302  | 5.033333  | 15.236   | 5.295712 | Unclassified | chr11:102049012-102055396 | 4.385    |
| <b>Fam133b</b>       | 0 | 0 | 0 | 527  | 8.783333  | 6.95722  | 16.1732  | Unclassified | chr5:3541832-3570546      | 26.715   |
| <b>Dlk1</b>          | 0 | 0 | 0 | 22   | 0.366667  | 1.20769  | 2.658449 | Unclassified | chr12:110689432-110698901 | 7.47     |
| <b>Zdhhc24</b>       | 0 | 0 | 0 | 432  | 7.2       | 7.15082  | 7.726347 | Unclassified | chr19:4876667-4885396     | 6.73     |
| <b>Mpp3</b>          | 0 | 0 | 0 | 52   | 0.866667  | 0.139427 | 1.435338 | Unclassified | chr11:101860966-101890269 | 27.304   |
| <b>Bhlha9</b>        | 0 | 0 | 0 | 8    | 0.133333  | 0.159275 | 6        | Unclassified | chr11:76483971-76487178   | 1.208    |
| <b>Dlg1</b>          | 0 | 0 | 0 | 1135 | 18.91667  | 5.23865  | 35.13991 | Stalled      | chr16:31662124-31873430   | 209.307  |
| <b>Dkk1</b>          | 0 | 0 | 0 | 3    | 0.05      | 0.045834 | 0.723298 | Unclassified | chr19:30620373-30625986   | 3.614    |
| <b>38778</b>         | 0 | 0 | 0 | 931  | 15.51667  | 4.45641  | 44.41798 | Stalled      | chr18:56921369-57087202   | 163.834  |
| <b>Slc13a4</b>       | 0 | 0 | 0 | 73   | 1.216667  | 0.044891 | 1.448579 | Unclassified | chr6:35217952-35260126    | 40.175   |
| <b>Ddit4l</b>        | 0 | 0 | 0 | 7    | 0.116667  | 0.556002 | 2.356361 | Unclassified | chr3:137284635-137291295  | 4.661    |
| <b>Syt4</b>          | 0 | 0 | 0 | 10   | 0.166667  | 0.055852 | 0        | Unclassified | chr18:31597461-31609069   | 9.609    |
| <b>Dll1</b>          | 0 | 0 | 0 | 44   | 0.733333  | 3.02358  | 6.209135 | Unclassified | chr17:15504317-15514787   | 8.471    |
| <b>Dll3</b>          | 0 | 0 | 0 | 44   | 0.733333  | 0.427837 | 3.588251 | Unclassified | chr7:29078573-29088804    | 8.232    |
| <b>Plekhf2</b>       | 0 | 0 | 0 | 648  | 10.8      | 5.14913  | 21.68946 | Unclassified | chr4:10915809-10936766    | 18.958   |
| <b>Slc25a18</b>      | 0 | 0 | 0 | 460  | 7.666667  | 0.202621 | 0.164515 | Unclassified | chr6:120721785-120744000  | 20.216   |
| <b>Mnda</b>          | 0 | 0 | 0 | 21   | 0.35      | 6.77168  | 2.632656 | Unclassified | chr1:175826485-175845053  | 16.569   |
| <b>Fam54a</b>        | 0 | 0 | 0 | 340  | 5.666667  | 3.18773  | 20.06745 | Unclassified | chr10:20065624-20081475   | 13.852   |
| <b>Tm4sf1</b>        | 0 | 0 | 0 | 10   | 0.166667  | 0.033692 | 0        | Unclassified | chr3:57090985-57107841    | 14.857   |
| <b>Nr2c2</b>         | 0 | 0 | 0 | 279  | 4.65      | 6.04645  | 1.072029 | Unclassified | chr6:92086987-92117953    | 28.967   |
| <b>Olfr1051</b>      | 0 | 0 | 0 | 0    | 0         | 0.013793 | 0        | Unclassified | chr2:86115715-86118642    | 0.928    |
| <b>Pam</b>           | 0 | 0 | 0 | 236  | 3.933333  | 0.245203 | 10.07844 | Stalled      | chr1:99717670-99994209    | 274.54   |
| <b>Pde6g</b>         | 0 | 0 | 0 | 23   | 0.383333  | 0.242355 | 1.226415 | Unclassified | chr11:120308923-120316797 | 5.875    |
| <b>Astn1</b>         | 0 | 0 | 0 | 227  | 3.783333  | 0.033941 | 1.189064 | Unclassified | chr1:160290470-160621917  | 329.448  |
| <b>Gja1</b>          | 0 | 0 | 0 | 13   | 0.216667  | 0.21051  | 0        | Unclassified | chr10:56095105-56110225   | 13.121   |
| <b>Gip</b>           | 0 | 0 | 0 | 10   | 0.166667  | 0.17773  | 0        | Unclassified | chr11:95883858-95892142   | 6.285    |
| <b>Pde7a</b>         | 0 | 0 | 0 | 743  | 12.38333  | 6.63148  | 21.51974 | Unclassified | chr3:19125917-19213322    | 85.406   |
| <b>Tsc22d3</b>       | 0 | 0 | 0 | 334  | 5.566667  | 8.34725  | 6.398024 | Unclassified | chrX:137074067-137079724  | 3.658    |
| <b>Gif</b>           | 0 | 0 | 0 | 19   | 0.316667  | 0.033463 | 0.452721 | Unclassified | chr19:11820048-11837937   | 15.89    |
| <b>Ghr</b>           | 0 | 0 | 0 | 144  | 2.4       | 0.064465 | 3.285595 | Unclassified | chr15:3267759-3535230     | 265.472  |
| <b>Ghrh</b>          | 0 | 0 | 0 | 165  | 2.75      | 0        | 0        | Unclassified | chr2:157155231-157174391  | 17.161   |
| <b>Nr1h4</b>         | 0 | 0 | 0 | 43   | 0.716667  | 0.032512 | 0        | Unclassified | chr10:88916980-88971403   | 52.424   |
| <b>Ryk</b>           | 0 | 0 | 0 | 123  | 2.05      | 6.09411  | 3.591734 | Unclassified | chr9:102735249-102810637  | 73.389   |
| <b>Uimc1</b>         | 0 | 0 | 0 | 587  | 9.783333  | 6.39225  | 38.50928 | Stalled      | chr13:55129240-55203656   | 72.417   |
| <b>Rxbp1</b>         | 0 | 0 | 0 | 852  | 14.2      | 23.6836  | 12.78788 | Unclassified | chr17:34166796-34175344   | 6.549    |
| <b>Rxrg</b>          | 0 | 0 | 0 | 41   | 0.683333  | 0.048069 | 0        | Unclassified | chr1:169526492-169569755  | 41.264   |
| <b>Mfsd9</b>         | 0 | 0 | 0 | 110  | 1.833333  | 1.47181  | 20.48756 | Stalled      | chr1:40828884-40849502    | 18.619   |
| <b>Mtmr7</b>         | 0 | 0 | 0 | 143  | 2.383333  | 0.14974  | 1.132064 | Unclassified | chr8:41635512-41722146    | 84.635   |
| <b>Hectd3</b>        | 0 | 0 | 0 | 125  | 2.083333  | 7.71926  | 4.26995  | Unclassified | chr4:116665952-116677882  | 9.931    |
| <b>Mtmr3</b>         | 0 | 0 | 0 | 1191 | 19.85     | 17.7974  | 5.64306  | Unclassified | chr11:4380870-4496818     | 113.949  |
| <b>Crtc3</b>         | 0 | 0 | 0 | 1228 | 20.46667  | 3.85799  | 11.01828 | Unclassified | chr7:87731517-87835763    | 102.247  |
| <b>Ctsk</b>          | 0 | 0 | 0 | 60   | 1         | 0.190256 | 5.257867 | Unclassified | chr3:95301207-95313284    | 10.078   |
| <b>Ctsl</b>          | 0 | 0 | 0 | 47   | 0.783333  | 1.69064  | 14.53452 | Stalled      | chr13:64464521-64473614   | 7.094    |
| <b>Pramel1</b>       | 0 | 0 | 0 | 8    | 0.133333  | 0.068284 | 0.843931 | Unclassified | chr4:142982343-142989722  | 5.38     |
| <b>Ctsg</b>          | 0 | 0 | 0 | 5    | 0.083333  | 0.038372 | 0.917456 | Unclassified | chr14:56718717-56723411   | 2.695    |
| <b>Ctsb</b>          | 0 | 0 | 0 | 431  | 7.183333  | 12.5199  | 9.212938 | Unclassified | chr14:63739301-63764758   | 23.458   |
| <b>Osbp18</b>        | 0 | 0 | 0 | 1592 | 26.53333  | 3.62929  | 42.85928 | Unclassified | chr10:110599857-110734303 | 132.447  |
| <b>Ctsc</b>          | 0 | 0 | 0 | 754  | 12.56667  | 28.2163  | 28.43693 | Unclassified | chr7:95424602-95459385    | 32.784   |
| <b>Ctsd</b>          | 0 | 0 | 0 | 210  | 3.5       | 39.4465  | 10.13334 | Unclassified | chr7:149561820-149575775  | 11.956   |
| <b>Susd2</b>         | 0 | 0 | 0 | 85   | 1.416667  | 0.215726 | 4.695148 | Unclassified | chr10:75099363-75108753   | 7.391    |
| <b>Emilin3</b>       | 0 | 0 | 0 | 12   | 0.2       | 0.043359 | 0.352145 | Unclassified | chr2:160732173-160740064  | 5.892    |
| <b>Pira3</b>         | 0 | 0 | 0 | 7    | 0.116667  | 0        | 1.826176 | Unclassified | chr7:3859881-3869103      | 7.223    |
| <b>4933402P03Rik</b> | 0 | 0 | 0 | 6    | 0.1       | 0.031743 | 0        | Unclassified | chr11:69630067-69633942   | 1.876    |

|                      |   |   |   |      |          |          |          |              |                           |         |
|----------------------|---|---|---|------|----------|----------|----------|--------------|---------------------------|---------|
| <b>Rbbp7</b>         | 0 | 0 | 0 | 712  | 11.86667 | 52.3123  | 17.29611 | Unclassified | chrX:159196303-159217022  | 18.72   |
| <b>Olfr360</b>       | 0 | 0 | 0 | 0    | 0        | 0        | 0        | Unclassified | chr2:36921826-36924780    | 0.955   |
| <b>Olfr541</b>       | 0 | 0 | 0 | 2    | 0.033333 | 0.040947 | 1        | Unclassified | chr7:147888151-147891090  | 0.94    |
| <b>Mamdc2</b>        | 0 | 0 | 0 | 181  | 3.016667 | 0.372327 | 1.353678 | Unclassified | chr19:23377098-23524812   | 145.715 |
| <b>Pira6</b>         | 0 | 0 | 0 | 3    | 0.05     | 0.149902 | 0.882408 | Unclassified | chr7:4223744-4234247      | 8.504   |
| <b>Olfr297</b>       | 0 | 0 | 0 | 1    | 0.016667 | 0        | 1        | Unclassified | chr7:93673268-93676201    | 0.934   |
| <b>Olfr171</b>       | 0 | 0 | 0 | 1    | 0.016667 | 0.02193  | 0        | Unclassified | chr16:19624249-19627194   | 0.946   |
| <b>Olfr292</b>       | 0 | 0 | 0 | 2    | 0.033333 | 0        | 0.858055 | Unclassified | chr7:93834850-93843894    | 7.045   |
| <b>Tuba3a</b>        | 0 | 0 | 0 | 11   | 0.183333 | 0.096035 | 1.375085 | Unclassified | chr6:125228291-125238060  | 7.77    |
| <b>Ear5</b>          | 0 | 0 | 0 | 1    | 0.016667 | 0.067543 | 1        | Unclassified | chr14:51779934-51782893   | 0.76    |
| <b>Rdh7</b>          | 0 | 0 | 0 | 3    | 0.05     | 0.008216 | 0.649553 | Unclassified | chr10:127321083-127327789 | 4.707   |
| <b>Egfl6</b>         | 0 | 0 | 0 | 30   | 0.5      | 0.213605 | 4.319936 | Unclassified | chrX:162960938-163025648  | 62.711  |
| <b>Nlrx1</b>         | 0 | 0 | 0 | 181  | 3.016667 | 2.53637  | 8.282221 | Unclassified | chr9:44060795-44078574    | 15.78   |
| <b>Tuba3b</b>        | 0 | 0 | 0 | 6    | 0.1      | 0.072102 | 0.530296 | Unclassified | chr6:145562482-145569997  | 5.516   |
| <b>Ccdc153</b>       | 0 | 0 | 0 | 13   | 0.216667 | 0.047206 | 0.891616 | Unclassified | chr9:44046759-44055389    | 6.631   |
| <b>Sbp</b>           | 0 | 0 | 0 | 3    | 0.05     | 0.099056 | 3        | Unclassified | chr17:24076962-24082574   | 3.613   |
| <b>Serpinb3d</b>     | 0 | 0 | 0 | 5    | 0.083333 | 0        | 0        | Unclassified | chr1:108974769-108982057  | 5.289   |
| <b>Satb1</b>         | 0 | 0 | 0 | 4319 | 71.98333 | 13.406   | 6.450299 | Unclassified | chr17:51875512-51973972   | 96.461  |
| <b>Nkx1-2</b>        | 0 | 0 | 0 | 17   | 0.283333 | 0.700419 | 0.895522 | Unclassified | chr7:139787921-139793320  | 3.4     |
| <b>Wnt2</b>          | 0 | 0 | 0 | 32   | 0.533333 | 0.036358 | 1.827191 | Unclassified | chr6:17938939-17982445    | 41.507  |
| <b>Sytl2</b>         | 0 | 0 | 0 | 81   | 1.35     | 0.174058 | 0.875611 | Unclassified | chr7:97495208-97558949    | 61.742  |
| <b>Dnajc3</b>        | 0 | 0 | 0 | 1001 | 16.68333 | 17.7328  | 21.6124  | Unclassified | chr14:119335153-119380924 | 43.772  |
| <b>Bicc1</b>         | 0 | 0 | 0 | 211  | 3.516667 | 0.04966  | 1.057834 | Unclassified | chr10:70387847-70624382   | 234.536 |
| <b>Cnrm1</b>         | 0 | 0 | 0 | 103  | 1.716667 | 0.157661 | 0        | Unclassified | chr19:43512925-43571703   | 56.779  |
| <b>4930548H24Rik</b> | 0 | 0 | 0 | 7    | 0.116667 | 0.080832 | 2.336798 | Unclassified | chr5:31786231-31790635    | 2.405   |
| <b>Wnt11</b>         | 0 | 0 | 0 | 42   | 0.7      | 0.188475 | 2.715743 | Unclassified | chr7:105985354-106003257  | 15.904  |
| <b>Ubap1</b>         | 0 | 0 | 0 | 670  | 11.16667 | 8.41512  | 13.1877  | Unclassified | chr4:41294028-41336799    | 40.772  |
| <b>Aqp7</b>          | 0 | 0 | 0 | 34   | 0.566667 | 0.101556 | 0        | Unclassified | chr4:40980106-40997169    | 15.064  |
| <b>0610009O20Rik</b> | 0 | 0 | 0 | 611  | 10.18333 | 10.6806  | 29.43947 | Unclassified | chr18:38407902-38422283   | 12.382  |
| <b>Defa21</b>        | 0 | 0 | 0 | 0    | 0        | 0        | 0        | Unclassified | chr8:22163223-22166196    | 0.974   |
| <b>Synpo2</b>        | 0 | 0 | 0 | 150  | 2.5      | 0.135067 | 1.04146  | Unclassified | chr3:122779438-122941067  | 159.63  |
| <b>Fam3a</b>         | 0 | 0 | 0 | 154  | 2.566667 | 7.22305  | 31.27711 | Stalled      | chrX:71630058-71640478    | 8.421   |
| <b>Rsph3a</b>        | 0 | 0 | 0 | 164  | 2.733333 | 11.3277  | 46.84968 | Stalled      | chr17:8136478-8172421     | 33.944  |
| <b>Timm50</b>        | 0 | 0 | 0 | 444  | 7.4      | 22.9658  | 6.242985 | Unclassified | chr7:29090844-29099065    | 6.222   |
| <b>1810030N24Rik</b> | 0 | 0 | 0 | 227  | 3.783333 | 4.67267  | 26.61263 | Stalled      | chr4:34715920-34727586    | 9.667   |
| <b>Rdbp</b>          | 0 | 0 | 0 | 258  | 4.3      | 27.8249  | 9.421039 | Unclassified | chr17:34985335-34993317   | 5.983   |
| <b>Polr1b</b>        | 0 | 0 | 0 | 757  | 12.61667 | 11.4023  | 6.624335 | Unclassified | chr2:128924731-128952330  | 25.6    |
| <b>Vps4a</b>         | 0 | 0 | 0 | 386  | 6.433333 | 10.3436  | 6.911163 | Unclassified | chr8:109553225-109569656  | 14.432  |
| <b>Fam23a</b>        | 0 | 0 | 0 | 38   | 0.633333 | 0.031533 | 0        | Unclassified | chr2:14094150-14143620    | 47.471  |
| <b>Bhlhe22</b>       | 0 | 0 | 0 | 7    | 0.116667 | 0.096424 | 0.844153 | Unclassified | chr3:17952324-17957514    | 3.191   |
| <b>Mgp</b>           | 0 | 0 | 0 | 7    | 0.116667 | 0.149773 | 1.116761 | Unclassified | chr6:136820955-136826326  | 3.372   |
| <b>Mrps30</b>        | 0 | 0 | 0 | 227  | 3.783333 | 21.2786  | 10.87448 | Unclassified | chr13:119168916-119178059 | 7.144   |
| <b>Slu7</b>          | 0 | 0 | 0 | 275  | 4.583333 | 7.29853  | 6.581697 | Unclassified | chr11:43245232-43261483   | 14.252  |
| <b>Evc</b>           | 0 | 0 | 0 | 66   | 1.1      | 0.10108  | 1.138785 | Unclassified | chr5:37690410-37730120    | 37.711  |
| <b>Sic17a8</b>       | 0 | 0 | 0 | 62   | 1.033333 | 0.017273 | 0.870386 | Unclassified | chr10:89036764-89085994   | 47.231  |
| <b>Sic5a8</b>        | 0 | 0 | 0 | 23   | 0.383333 | 0.031254 | 1.338843 | Unclassified | chr10:88346736-88392260   | 43.525  |
| <b>Pamr1</b>         | 0 | 0 | 0 | 94   | 1.566667 | 0.062788 | 1.005568 | Unclassified | chr2:102388177-102483195  | 93.019  |
| <b>Cd209e</b>        | 0 | 0 | 0 | 5    | 0.083333 | 0.028947 | 0        | Unclassified | chr8:3847972-3856286      | 6.315   |
| <b>Stx1a</b>         | 0 | 0 | 0 | 221  | 3.683333 | 2.64145  | 10.98099 | Stalled      | chr5:135497441-135526969  | 27.529  |
| <b>Lphn3</b>         | 0 | 0 | 0 | 349  | 5.816667 | 0.059539 | 0.691452 | Unclassified | chr5:81448617-82224755    | 774.139 |
| <b>4931417E11Rik</b> | 0 | 0 | 0 | 1    | 0.016667 | 0        | 1        | Unclassified | chr6:73418575-73421661    | 1.087   |
| <b>Cd200r3</b>       | 0 | 0 | 0 | 50   | 0.833333 | 0.121521 | 0        | Unclassified | chr16:44941790-44981493   | 37.704  |
| <b>4933400A11Rik</b> | 0 | 0 | 0 | 2    | 0.033333 | 0        | 0.693157 | Unclassified | chrX:166214309-166219567  | 3.259   |
| <b>Trpd52i3</b>      | 0 | 0 | 0 | 3    | 0.05     | 0.017234 | 0        | Unclassified | chr19:30076279-30080510   | 2.232   |
| <b>Col11a1</b>       | 0 | 0 | 0 | 80   | 1.333333 | 0.036996 | 2.163445 | Unclassified | chr3:113731457-113923244  | 189.788 |
| <b>Col13a1</b>       | 0 | 0 | 0 | 226  | 3.766667 | 0.070711 | 0.387153 | Unclassified | chr10:61301245-61443856   | 140.612 |
| <b>Cdc45l</b>        | 0 | 0 | 0 | 1165 | 19.41667 | 20.4659  | 8.395964 | Unclassified | chr16:18780539-18814065   | 31.527  |
| <b>D3Bwg0562e</b>    | 0 | 0 | 0 | 31   | 0.516667 | 0.027029 | 1.202752 | Unclassified | chr3:117022062-117065794  | 41.733  |
| <b>Coch</b>          | 0 | 0 | 0 | 85   | 1.416667 | 0.29933  | 0.760412 | Unclassified | chr12:52692441-52706760   | 12.32   |
| <b>Col10a1</b>       | 0 | 0 | 0 | 78   | 1.3      | 0        | 0.247186 | Unclassified | chr10:34107786-34116891   | 7.106   |
| <b>Hira</b>          | 0 | 0 | 0 | 1847 | 30.78333 | 15.3498  | 28.99584 | Unclassified | chr16:18874842-18970401   | 93.56   |
| <b>Zfp248</b>        | 0 | 0 | 0 | 211  | 3.516667 | 1.07775  | 47.63674 | Stalled      | chr6:118377336-118407524  | 28.189  |
| <b>Aqp6</b>          | 0 | 0 | 0 | 8    | 0.133333 | 0.062215 | 1.739794 | Unclassified | chr15:99429830-99435908   | 4.079   |
| <b>Col14a1</b>       | 0 | 0 | 0 | 259  | 4.316667 | 0.059639 | 2.765597 | Unclassified | chr15:55137304-55352357   | 213.054 |
| <b>Cdgap</b>         | 0 | 0 | 0 | 328  | 5.466667 | 0.905836 | 15.91201 | Stalled      | chr16:38598455-38715148   | 114.694 |
| <b>Tmsb15b1</b>      | 0 | 0 | 0 | 39   | 0.65     | 0        | 12.2225  | Stalled      | chrX:133508560-133513413  | 2.854   |
| <b>Fmod</b>          | 0 | 0 | 0 | 23   | 0.383333 | 0.03138  | 0        | Unclassified | chr1:135932091-135944854  | 10.764  |
| <b>Gtl3</b>          | 0 | 0 | 0 | 293  | 4.883333 | 17.3579  | 15.10866 | Unclassified | chr8:97944151-97960769    | 14.619  |
| <b>Nr4a2</b>         | 0 | 0 | 0 | 147  | 2.45     | 0.928194 | 13.32566 | Stalled      | chr2:56959637-56978414    | 16.778  |
| <b>Pnp2</b>          | 0 | 0 | 0 | 31   | 0.516667 | 13.4074  | 11.45927 | Stalled      | chr14:51573815-51584424   | 8.61    |
| <b>Gbp1</b>          | 0 | 0 | 0 | 192  | 3.2      | 8.28716  | 1.080522 | Unclassified | chr3:142255810-142282140  | 24.331  |
| <b>Agps</b>          | 0 | 0 | 0 | 841  | 14.01667 | 5.33953  | 24.65417 | Unclassified | chr2:75668248-75767706    | 97.459  |
| <b>Atxn3</b>         | 0 | 0 | 0 | 356  | 5.933333 | 2.33213  | 14.4639  | Unclassified | chr12:103157112-103198453 | 39.342  |
| <b>Nasp</b>          | 0 | 0 | 0 | 1063 | 17.71667 | 39.7604  | 13.11066 | Unclassified | chr4:116273656-116302102  | 26.447  |
| <b>Sema5b</b>        | 0 | 0 | 0 | 174  | 2.9      | 0.10971  | 0.413356 | Unclassified | chr16:35539447-35664344   | 122.898 |
| <b>Pdp1</b>          | 0 | 0 | 0 | 295  | 4.916667 | 0.952475 | 76.36763 | Stalled      | chr4:11885331-11895597    | 8.267   |
| <b>Itpka</b>         | 0 | 0 | 0 | 187  | 3.116667 | 1.79304  | 23.41459 | Stalled      | chr2:119566072-119576989  | 8.918   |
| <b>Crybg3</b>        | 0 | 0 | 0 | 429  | 7.15     | 2.60386  | 0.914414 | Unclassified | chr16:59491921-59557578   | 63.658  |
| <b>Kcnj2</b>         | 0 | 0 | 0 | 16   | 0.266667 | 0.331635 | 4.318521 | Unclassified | chr11:110925477-110938139 | 10.663  |
| <b>Kcnj3</b>         | 0 | 0 | 0 | 77   | 1.283333 | 0.0687   | 0.689102 | Unclassified | chr2:55287566-55447936    | 158.371 |
| <b>Bean</b>          | 0 | 0 | 0 | 75   | 1.25     | 0.202023 | 0.795826 | Unclassified | chr8:106692412-106742995  | 48.584  |
| <b>Timm8a2</b>       | 0 | 0 | 0 | 58   | 0.966667 | 0.168083 | 1        | Unclassified | chr14:122431895-122437644 | 3.75    |
| <b>Elov16</b>        | 0 | 0 | 0 | 1134 | 18.9     | 3.55141  | 6.231525 | Unclassified | chr3:129233303-129341411  | 106.109 |
| <b>Kcnh3</b>         | 0 | 0 | 0 | 185  | 3.083333 | 0.064386 | 0.256697 | Unclassified | chr15:99053406-99073248   | 17.843  |
| <b>Kcnj12</b>        | 0 | 0 | 0 | 13   | 0.216667 | 0.031221 | 0.564812 | Unclassified | chr11:60877305-60884633   | 5.329   |
| <b>Trim27</b>        | 0 | 0 | 0 | 1193 | 19.88333 | 39.818   | 8.895245 | Unclassified | chr13:21269827-21284726   | 12.9    |

|               |   |   |   |      |          |          |          |              |                           |         |
|---------------|---|---|---|------|----------|----------|----------|--------------|---------------------------|---------|
| Kcnj16        | 0 | 0 | 0 | 48   | 0.8      | 0.024769 | 1.123275 | Unclassified | chr11:110827346-110889281 | 59.936  |
| Zfp28         | 0 | 0 | 0 | 98   | 1.633333 | 0.757009 | 25.8475  | Stalled      | chr7:6334027-6349347      | 13.321  |
| Cebpd         | 0 | 0 | 0 | 61   | 1.016667 | 3.40785  | 6.599366 | Unclassified | chr16:15885378-15889638   | 2.261   |
| Zfp30         | 0 | 0 | 0 | 29   | 0.483333 | 0.26564  | 1.41435  | Unclassified | chr7:30567808-30579559    | 9.752   |
| Zfp37         | 0 | 0 | 0 | 42   | 0.7      | 0.29364  | 16.71594 | Stalled      | chr4:61850576-61871580    | 19.005  |
| Zscan21       | 0 | 0 | 0 | 275  | 4.583333 | 4.23596  | 35.32732 | Stalled      | chr5:138556132-138575487  | 17.356  |
| Zfp39         | 0 | 0 | 0 | 353  | 5.883333 | 2.24355  | 12.25757 | Unclassified | chr11:58701654-58719727   | 16.074  |
| Klf14         | 0 | 0 | 0 | 7    | 0.116667 | 0.457418 | 0.3965   | Unclassified | chr6:30906020-30910990    | 2.971   |
| Cebpa         | 0 | 0 | 0 | 16   | 0.266667 | 0.334837 | 3.182288 | Unclassified | chr7:35902311-35906951    | 2.641   |
| Tsn           | 0 | 0 | 0 | 373  | 6.216667 | 19.8176  | 20.06629 | Unclassified | chr1:120195094-120209709  | 12.616  |
| Commd4        | 0 | 0 | 0 | 126  | 2.1      | 27.0295  | 2.54073  | Elongating   | chr9:57002847-57008106    | 3.26    |
| Lrrc8c        | 0 | 0 | 0 | 1344 | 22.4     | 5.57584  | 18.57936 | Unclassified | chr5:105946489-106037973  | 89.485  |
| Vmn2r26       | 0 | 0 | 0 | 16   | 0.266667 | 0.019951 | 0        | Unclassified | chr6:123972775-124012053  | 37.279  |
| Noc4l         | 0 | 0 | 0 | 560  | 9.333333 | 20.9747  | 6.251324 | Unclassified | chr5:111077437-111084401  | 4.965   |
| ORF63         | 0 | 0 | 0 | 29   | 0.483333 | 0.015526 | 0.611981 | Unclassified | chr16:87551574-87595580   | 42.007  |
| Wapal         | 0 | 0 | 0 | 668  | 11.13333 | 12.3953  | 26.3164  | Unclassified | chr14:35485113-35559403   | 72.291  |
| V1rc12        | 0 | 0 | 0 | 0    | 0        | 0.017343 | 0        | Unclassified | chr6:66628787-66631678    | 0.892   |
| Tlr5          | 0 | 0 | 0 | 38   | 0.633333 | 0.116184 | 1.550614 | Unclassified | chr1:184882918-184906175  | 21.258  |
| Fam5b         | 0 | 0 | 0 | 67   | 1.116667 | 0.087548 | 1.257105 | Unclassified | chr1:160175401-160288391  | 110.991 |
| Lce1g         | 0 | 0 | 0 | 2    | 0.033333 | 0        | 0.54317  | Unclassified | chr3:92554072-92558260    | 2.189   |
| Hspa13        | 0 | 0 | 0 | 112  | 1.866667 | 5.2484   | 10.50502 | Stalled      | chr16:75755437-75769063   | 11.627  |
| Pycr1         | 0 | 0 | 0 | 266  | 4.433333 | 18.7988  | 6.06052  | Unclassified | chr15:75746892-75753990   | 5.099   |
| F7            | 0 | 0 | 0 | 16   | 0.266667 | 0.117265 | 0        | Unclassified | chr8:13024033-13035808    | 9.776   |
| Svs3b         | 0 | 0 | 0 | 2    | 0.033333 | 0.10227  | 0        | Unclassified | chr2:164080098-164084379  | 2.282   |
| F3            | 0 | 0 | 0 | 25   | 0.416667 | 0.587529 | 4.718644 | Unclassified | chr3:121424454-121437970  | 11.517  |
| F5            | 0 | 0 | 0 | 75   | 1.25     | 0.164353 | 1.962406 | Unclassified | chr1:166079989-166150405  | 68.417  |
| Zc3h14        | 0 | 0 | 0 | 492  | 8.2      | 9.46658  | 9.980424 | Unclassified | chr12:99983177-100025982  | 40.806  |
| Paqr9         | 0 | 0 | 0 | 10   | 0.166667 | 1.13969  | 1.580157 | Unclassified | chr9:95458235-95462540    | 2.306   |
| Gm11301       | 0 | 0 | 0 | 2    | 0.033333 | 0.056364 | 0        | Unclassified | chr13:22646069-22648978   | 0.91    |
| 1700026D08Rik | 0 | 0 | 0 | 17   | 0.283333 | 0.099121 | 3.014757 | Unclassified | chr7:90924127-90945349    | 19.223  |
| Prss2         | 0 | 0 | 0 | 8    | 0.133333 | 0        | 0.631075 | Unclassified | chr6:41469774-41475078    | 3.305   |
| Prss3         | 0 | 0 | 0 | 1    | 0.016667 | 0.012985 | 0        | Unclassified | chr6:41323757-41329612    | 3.856   |
| Efna1         | 0 | 0 | 0 | 57   | 0.95     | 0.976192 | 8.132863 | Unclassified | chr3:89075651-89085567    | 7.917   |
| Efna2         | 0 | 0 | 0 | 47   | 0.783333 | 0.622883 | 1.606049 | Unclassified | chr10:79640226-79652753   | 10.528  |
| Dmrt3         | 0 | 0 | 0 | 18   | 0.3      | 0.402186 | 2.031577 | Unclassified | chr19:25683026-25698410   | 13.385  |
| Adck1         | 0 | 0 | 0 | 459  | 7.65     | 5.3845   | 20.63908 | Stalled      | chr12:89597244-89700162   | 100.919 |
| Gpr126        | 0 | 0 | 0 | 101  | 1.683333 | 0.027583 | 2.392915 | Unclassified | chr10:14122390-14266842   | 142.453 |
| Stab2         | 0 | 0 | 0 | 277  | 4.616667 | 0.039396 | 0.376041 | Unclassified | chr10:86303954-86472687   | 166.734 |
| Gsta3         | 0 | 0 | 0 | 22   | 0.366667 | 0.075668 | 0.533043 | Unclassified | chr1:21228669-21255640    | 24.972  |
| Efna3         | 0 | 0 | 0 | 30   | 0.5      | 0.303407 | 0.896217 | Unclassified | chr3:89118872-89128801    | 7.93    |
| Hace1         | 0 | 0 | 0 | 282  | 4.7      | 2.13212  | 26.97586 | Stalled      | chr10:45295634-45432151   | 134.518 |
| Olf1047       | 0 | 0 | 0 | 0    | 0        | 0        | 0        | Unclassified | chr2:86068166-86071126    | 0.961   |
| Lmcd1         | 0 | 0 | 0 | 64   | 1.066667 | 0.490951 | 0.96253  | Unclassified | chr6:112221751-112280416  | 56.666  |
| F2            | 0 | 0 | 0 | 91   | 1.516667 | 0.019341 | 0.207959 | Unclassified | chr2:91465476-91478571    | 11.096  |
| Mff           | 0 | 0 | 0 | 271  | 4.516667 | 11.922   | 14.40339 | Unclassified | chr1:82719492-82748964    | 27.473  |
| Klrg2         | 0 | 0 | 0 | 347  | 5.783333 | 8.1308   | 1.898056 | Elongating   | chr6:38576659-38589239    | 10.581  |
| Zbed3         | 0 | 0 | 0 | 447  | 7.45     | 7.49948  | 10.58837 | Unclassified | chr13:96093191-96107796   | 12.606  |
| Tspan7        | 0 | 0 | 0 | 35   | 0.583333 | 0.07947  | 3.123613 | Unclassified | chrX:10060241-10173730    | 111.49  |
| Tmod1         | 0 | 0 | 0 | 200  | 3.333333 | 0.116407 | 1.410131 | Unclassified | chr4:46050093-46128904    | 76.812  |
| Tmpo          | 0 | 0 | 0 | 1863 | 31.05    | 38.1676  | 15.58619 | Unclassified | chr10:90610315-90636327   | 24.013  |
| Mpp7          | 0 | 0 | 0 | 615  | 10.25    | 3.15922  | 65.12416 | Stalled      | chr18:7347959-7628861     | 278.903 |
| Gpr123        | 0 | 0 | 0 | 66   | 1.1      | 0.061954 | 1.636204 | Unclassified | chr7:147018072-147063987  | 43.916  |
| Rab28         | 0 | 0 | 0 | 287  | 4.783333 | 10.4328  | 26.84817 | Stalled      | chr5:42016214-42101394    | 83.181  |
| Scamp5        | 0 | 0 | 0 | 54   | 0.9      | 0.104426 | 4.693953 | Unclassified | chr9:57289133-57317831    | 26.699  |
| Mmp7          | 0 | 0 | 0 | 8    | 0.133333 | 0        | 0.473961 | Unclassified | chr9:7690110-7699416      | 7.307   |
| Zbtb33        | 0 | 0 | 0 | 147  | 2.45     | 3.15974  | 18.63302 | Stalled      | chrX:35540969-35550223    | 7.255   |
| Mmp9          | 0 | 0 | 0 | 23   | 0.383333 | 0.43676  | 1.072814 | Unclassified | chr2:164771750-164781346  | 7.597   |
| Nfx1l         | 0 | 0 | 0 | 235  | 3.916667 | 4.01563  | 30.53532 | Stalled      | chr5:72904542-72952884    | 46.343  |
| Syt9          | 0 | 0 | 0 | 128  | 2.133333 | 0.073889 | 0.583976 | Unclassified | chr7:114512303-114692169  | 177.867 |
| Olf1404       | 0 | 0 | 0 | 3    | 0.05     | 0        | 2        | Unclassified | chr1:175143783-175146725  | 0.943   |
| E2f5          | 0 | 0 | 0 | 308  | 5.133333 | 4.24504  | 21.35355 | Unclassified | chr3:14576670-14606309    | 27.64   |
| Tmem151a      | 0 | 0 | 0 | 24   | 0.4      | 0.201423 | 1.531725 | Unclassified | chr19:5079336-5087477     | 6.142   |
| Prr19         | 0 | 0 | 0 | 1    | 0.016667 | 0.148681 | 0        | Unclassified | chr7:26084377-26089152    | 2.776   |
| Rph3a         | 0 | 0 | 0 | 101  | 1.683333 | 0.049664 | 0.819419 | Unclassified | chr5:121390508-121461527  | 69.02   |
| Olf1689       | 0 | 0 | 0 | 2    | 0.033333 | 0.005474 | 1        | Unclassified | chr7:112460519-112463482  | 0.964   |
| Rpe65         | 0 | 0 | 0 | 8    | 0.133333 | 0.03477  | 0        | Unclassified | chr3:159260144-159288271  | 26.128  |
| Sfrs12        | 0 | 0 | 0 | 324  | 5.4      | 7.67308  | 0.331889 | Unclassified | chr13:104531694-104556662 | 22.969  |
| Nxph3         | 0 | 0 | 0 | 19   | 0.316667 | 0.367405 | 2.047559 | Unclassified | chr11:95371159-95377879   | 4.721   |
| Ap3b2         | 0 | 0 | 0 | 46   | 0.766667 | 0.309801 | 1.292024 | Unclassified | chr7:88605284-88640811    | 33.528  |
| Ap3s1         | 0 | 0 | 0 | 227  | 3.783333 | 2.92724  | 57.95467 | Stalled      | chr18:46899570-46950480   | 48.911  |
| Olf1299       | 0 | 0 | 0 | 3    | 0.05     | 0.038573 | 0.730821 | Unclassified | chr2:111499609-111505323  | 3.715   |
| Ceacam11      | 0 | 0 | 0 | 5    | 0.083333 | 0.050708 | 0.642474 | Unclassified | chr7:18555515-18563905    | 6.391   |
| Nudcd2        | 0 | 0 | 0 | 373  | 6.216667 | 28.4214  | 25.36542 | Unclassified | chr11:40545143-40553549   | 6.407   |
| Lum           | 0 | 0 | 0 | 5    | 0.083333 | 0.024706 | 2.268649 | Unclassified | chr10:97026134-97035337   | 7.204   |
| Cnmn4         | 0 | 0 | 0 | 448  | 7.466667 | 4.70523  | 35.5405  | Stalled      | chr1:36526441-36565621    | 37.181  |
| Sh2d7         | 0 | 0 | 0 | 12   | 0.2      | 0.037162 | 0.314129 | Unclassified | chr9:54384790-54392827    | 6.038   |
| Recql         | 0 | 0 | 0 | 788  | 13.13333 | 9.12457  | 20.15802 | Unclassified | chr6:142310419-142337607  | 25.189  |
| Phyhip        | 0 | 0 | 0 | 27   | 0.45     | 0.615644 | 2.38091  | Unclassified | chr14:70855323-70868631   | 11.309  |
| Dkk4          | 0 | 0 | 0 | 35   | 0.583333 | 0.360886 | 0.318045 | Unclassified | chr8:23732514-23738018    | 3.505   |
| Gpr75         | 0 | 0 | 0 | 10   | 0.166667 | 0.126347 | 0.713415 | Unclassified | chr11:30789096-30792719   | 1.624   |
| Spr1a         | 0 | 0 | 0 | 6    | 0.1      | 0.097339 | 0.634346 | Unclassified | chr3:92287875-92291803    | 1.929   |
| Zfp868        | 0 | 0 | 0 | 476  | 7.933333 | 3.2327   | 28.68472 | Unclassified | chr8:72134552-72151447    | 14.896  |
| Spr           | 0 | 0 | 0 | 137  | 2.283333 | 12.9641  | 28.29895 | Stalled      | chr6:85083673-85089758    | 4.086   |
| Spp1          | 0 | 0 | 0 | 6    | 0.1      | 0.699899 | 1.104544 | Unclassified | chr5:104862136-104870069  | 5.934   |
| Spr2b         | 0 | 0 | 0 | 1    | 0.016667 | 0.015084 | 1        | Unclassified | chr3:92118626-92122007    | 1.382   |
| Spr1b         | 0 | 0 | 0 | 0    | 0        | 0        | 0        | Unclassified | chr3:92240730-92244701    | 1.972   |

|               |   |   |   |      |          |          |          |              |                           |          |
|---------------|---|---|---|------|----------|----------|----------|--------------|---------------------------|----------|
| Txn1          | 0 | 0 | 0 | 730  | 12.16667 | 18.2848  | 50.38242 | Unclassified | chr18:63822454-63854013   | 29.56    |
| Ddr1          | 0 | 0 | 0 | 72   | 1.2      | 0.194292 | 0.879686 | Unclassified | chr17:35818511-35843084   | 22.574   |
| Prsm10        | 0 | 0 | 0 | 77   | 1.283333 | 12.0486  | 18.77705 | Stalled      | chrX:137482963-137493250  | 8.288    |
| Prdx4         | 0 | 0 | 0 | 227  | 3.783333 | 44.0739  | 27.05943 | Stalled      | chrX:151758462-151774997  | 14.536   |
| Pilra         | 0 | 0 | 0 | 24   | 0.4      | 0.22864  | 0.388254 | Unclassified | chr5:138263179-138279506  | 14.328   |
| Cenpi         | 0 | 0 | 0 | 358  | 5.966667 | 1.53045  | 23.17878 | Stalled      | chrX:130840701-130897178  | 54.478   |
| Phipp2        | 0 | 0 | 0 | 694  | 11.56667 | 3.13453  | 22.24508 | Unclassified | chr8:112390502-112468571  | 76.07    |
| Hydin         | 0 | 0 | 0 | 314  | 5.233333 | 0.029233 | 1.576645 | Unclassified | chr8:112788876-113134153  | 343.278  |
| AI314831      | 0 | 0 | 0 | 66   | 1.1      | 0.070613 | 0.882621 | Unclassified | chr2:104916694-104968667  | 49.974   |
| Lrrc17        | 0 | 0 | 0 | 36   | 0.6      | 0.059436 | 0        | Unclassified | chr5:21047344-21081720    | 32.377   |
| Hecw1         | 0 | 0 | 0 | 132  | 2.2      | 0.077223 | 0        | Unclassified | chr13:14318704-14617493   | 296.79   |
| Klk10         | 0 | 0 | 0 | 9    | 0.15     | 0.265035 | 0        | Unclassified | chr7:51034423-51040780    | 4.358    |
| Reln          | 0 | 0 | 0 | 332  | 5.533333 | 0.122646 | 1.165243 | Unclassified | chr5:21390271-21852523    | 460.253  |
| Rpe           | 0 | 0 | 0 | 361  | 6.016667 | 8.27277  | 24.0887  | Unclassified | chr1:66745466-66766379    | 18.914   |
| Ate1          | 0 | 0 | 0 | 832  | 13.86667 | 6.35482  | 46.34657 | Stalled      | chr7:137535007-137665044  | 128.038  |
| Slc5a1        | 0 | 0 | 0 | 54   | 0.9      | 0.055426 | 0.534797 | Unclassified | chr5:33444867-33505346    | 58.48    |
| Gata2         | 0 | 0 | 0 | 24   | 0.4      | 0.193767 | 1.076878 | Unclassified | chr6:88146657-88157024    | 8.368    |
| Slc4a1        | 0 | 0 | 0 | 35   | 0.583333 | 0.087242 | 0.347772 | Unclassified | chr11:102210133-102228595 | 16.463   |
| Slc3a1        | 0 | 0 | 0 | 70   | 1.166667 | 0.074203 | 1.819471 | Unclassified | chr17:85425686-85463581   | 35.896   |
| Slc34a2       | 0 | 0 | 0 | 33   | 0.55     | 0.0773   | 1.295558 | Unclassified | chr5:53438620-53462902    | 22.283   |
| Slc31a2       | 0 | 0 | 0 | 932  | 15.53333 | 38.3401  | 2.957796 | Elongating   | chr4:61945478-61959445    | 11.968   |
| Akr1a4        | 0 | 0 | 0 | 605  | 10.08333 | 114.483  | 10.38117 | Unclassified | chr4:116309114-116326256  | 15.143   |
| Jak3          | 0 | 0 | 0 | 642  | 10.7     | 36.5983  | 1.096226 | Elongating   | chr8:74200227-74214473    | 12.247   |
| Slc6a2        | 0 | 0 | 0 | 52   | 0.866667 | 0.037987 | 0.89418  | Unclassified | chr8:95482945-95525566    | 40.622   |
| Cldn11        | 0 | 0 | 0 | 26   | 0.433333 | 0.214439 | 1.70181  | Unclassified | chr3:31046912-31063240    | 14.329   |
| Odf4          | 0 | 0 | 0 | 14   | 0.233333 | 0.083223 | 0.641202 | Unclassified | chr11:68735337-68742583   | 5.247    |
| Atf1          | 0 | 0 | 0 | 1231 | 20.51667 | 12.766   | 25.18343 | Unclassified | chr15:100056289-100091679 | 33.391   |
| Epb4.9        | 0 | 0 | 0 | 50   | 0.833333 | 0.582119 | 0        | Unclassified | chr14:71003477-71031961   | 26.485   |
| Tmem102       | 0 | 0 | 0 | 34   | 0.566667 | 0.827814 | 0.032502 | Unclassified | chr11:69617098-69621172   | 2.075    |
| Zkscan3       | 0 | 0 | 0 | 293  | 4.883333 | 6.15083  | 9.05362  | Unclassified | chr13:21478873-21496624   | 15.752   |
| Olfr552       | 0 | 0 | 0 | 6    | 0.1      | 0.026869 | 2        | Unclassified | chr7:109750869-109753823  | 0.955    |
| Cdh13         | 0 | 0 | 0 | 983  | 16.38333 | 0.039177 | 1.545144 | Unclassified | chr8:120805654-121847348  | 1039.695 |
| Tmcc2         | 0 | 0 | 0 | 84   | 1.4      | 0.394533 | 2.202282 | Unclassified | chr1:134252891-134289858  | 34.968   |
| 4921509C19Rik | 0 | 0 | 0 | 2    | 0.033333 | 0.023154 | 0        | Unclassified | chr2:151296277-151303887  | 5.611    |
| Ibsp          | 0 | 0 | 0 | 7    | 0.116667 | 0.032829 | 0.691053 | Unclassified | chr5:104726305-104740488  | 12.184   |
| Gys2          | 0 | 0 | 0 | 36   | 0.6      | 0.038589 | 0.592805 | Unclassified | chr6:142371132-142423629  | 50.498   |
| Icam2         | 0 | 0 | 0 | 134  | 2.233333 | 16.3374  | 1.420867 | Elongating   | chr11:106238969-106245955 | 4.987    |
| Pyrrox1       | 0 | 0 | 0 | 320  | 5.333333 | 2.81678  | 8.077251 | Unclassified | chr6:142292216-142311144  | 16.929   |
| Eri2          | 0 | 0 | 0 | 179  | 2.983333 | 1.36765  | 32.02093 | Stalled      | chr7:126927340-126939572  | 10.233   |
| Tmem211       | 0 | 0 | 0 | 17   | 0.283333 | 0.021045 | 1.45864  | Unclassified | chr5:113653928-113668283  | 12.356   |
| Ccdc32        | 0 | 0 | 0 | 183  | 3.05     | 5.5981   | 8.690107 | Unclassified | chr2:118843514-118857129  | 11.616   |
| Pax8          | 0 | 0 | 0 | 60   | 1        | 0.045646 | 0.490946 | Unclassified | chr2:24276079-24333086    | 55.008   |
| Adam6a        | 0 | 0 | 0 | 1    | 0.016667 | 0.063692 | 1        | Unclassified | chr12:114780118-114784625 | 2.508    |
| Ankrd50       | 0 | 0 | 0 | 33   | 0.55     | 3.42212  | 2.592334 | Unclassified | chr3:38351000-38356479    | 3.48     |
| Krt25         | 0 | 0 | 0 | 5    | 0.083333 | 0.127379 | 0.603921 | Unclassified | chr11:99177157-99186255   | 7.099    |
| Olfr666       | 0 | 0 | 0 | 0    | 0        | 0.036219 | 0        | Unclassified | chr7:112041183-112044140  | 0.958    |
| Olfr851       | 0 | 0 | 0 | 0    | 0        | 0        | 0        | Unclassified | chr9:19299193-19302132    | 0.94     |
| Accn3         | 0 | 0 | 0 | 33   | 0.55     | 0.197986 | 0.971704 | Unclassified | chr5:23917268-23923652    | 4.385    |
| Helz          | 0 | 0 | 0 | 1380 | 23       | 5.92682  | 9.709069 | Unclassified | chr11:107407273-107548257 | 138.985  |
| Gm13051       | 0 | 0 | 0 | 2    | 0.033333 | 0        | 0        | Unclassified | chr4:146062745-146094024  | 29.28    |
| 1700057G04Rik | 0 | 0 | 0 | 27   | 0.45     | 0        | 0        | Unclassified | chr9:92202214-92252714    | 48.501   |
| 2310014L17Rik | 0 | 0 | 0 | 765  | 12.75    | 0.320507 | 9.267895 | Unclassified | chr7:13510764-13516421    | 3.658    |
| V1rc28        | 0 | 0 | 0 | 0    | 0        | 0.043008 | 0        | Unclassified | chr6:57793557-57796451    | 0.895    |
| V1rc27        | 0 | 0 | 0 | 0    | 0        | 0        | 0        | Unclassified | chr6:57352457-57355384    | 0.928    |
| Arhgap4       | 0 | 0 | 0 | 441  | 7.35     | 32.9346  | 8.961296 | Unclassified | chrX:71139690-71158637    | 16.948   |
| V1rc32        | 0 | 0 | 0 | 2    | 0.033333 | 0.036968 | 1        | Unclassified | chr6:56983906-56987119    | 1.214    |
| Olfr1496      | 0 | 0 | 0 | 1    | 0.016667 | 0        | 1        | Unclassified | chr19:13853037-13856104   | 1.068    |
| Hils1         | 0 | 0 | 0 | 0    | 0        | 0.048303 | 0        | Unclassified | chr11:94826974-94829770   | 0.797    |
| Ocm           | 0 | 0 | 0 | 33   | 0.55     | 0.03521  | 0.498361 | Unclassified | chr5:144780675-144813478  | 30.804   |
| Odc1          | 0 | 0 | 0 | 664  | 11.06667 | 23.2313  | 9.708147 | Unclassified | chr12:17549678-17558308   | 6.631    |
| Pgcp          | 0 | 0 | 0 | 267  | 4.45     | 0.612972 | 23.37536 | Stalled      | chr15:33010883-33524307   | 511.425  |
| Olfr157       | 0 | 0 | 0 | 3    | 0.05     | 0.029012 | 0        | Unclassified | chr4:43847623-43851389    | 1.767    |
| 5430416O09Rik | 0 | 0 | 0 | 6    | 0.1      | 0.111974 | 0.933618 | Unclassified | chr4:43740905-43747406    | 4.502    |
| Nlrp4f        | 0 | 0 | 0 | 24   | 0.4      | 0.038133 | 1.159787 | Unclassified | chr13:65278418-65309024   | 28.607   |
| Gatad2b       | 0 | 0 | 0 | 172  | 2.866667 | 6.87848  | 0.725908 | Unclassified | chr3:90143575-90162042    | 16.468   |
| 1810022K09Rik | 0 | 0 | 0 | 244  | 4.066667 | 20.0506  | 12.52958 | Unclassified | chr3:14606288-14613256    | 4.969    |
| Cr2           | 0 | 0 | 0 | 127  | 2.116667 | 0        | 29.41586 | Stalled      | chr1:196963004-197004909  | 39.906   |
| Sh2d1b2       | 0 | 0 | 0 | 10   | 0.166667 | 0.400637 | 0.663148 | Unclassified | chr1:172161001-172181718  | 18.718   |
| Wdr4          | 0 | 0 | 0 | 1332 | 22.2     | 9.17366  | 6.824484 | Unclassified | chr17:31631267-31651432   | 18.166   |
| Syt6          | 0 | 0 | 0 | 79   | 1.316667 | 0.075458 | 0.879761 | Unclassified | chr3:103377203-103439102  | 59.9     |
| Usp3          | 0 | 0 | 0 | 945  | 15.75    | 9.69409  | 22.40429 | Unclassified | chr9:66365687-66442787    | 75.101   |
| Hmcn1         | 0 | 0 | 0 | 265  | 4.416667 | 0.083977 | 3.124823 | Unclassified | chr1:152409631-152842565  | 430.935  |
| Ccr2          | 0 | 0 | 0 | 6    | 0.1      | 0.116028 | 0        | Unclassified | chr9:124014921-124023879  | 6.959    |
| Gm773         | 0 | 0 | 0 | 1    | 0.016667 | 0        | 0        | Unclassified | chrX:53443003-53468058    | 23.056   |
| Slc25a43      | 0 | 0 | 0 | 136  | 2.266667 | 1.11898  | 8.83611  | Unclassified | chrX:34281653-34317197    | 33.545   |
| Taar3         | 0 | 0 | 0 | 2    | 0.033333 | 0        | 1        | Unclassified | chr10:23667363-23670395   | 1.033    |
| V1ra5         | 0 | 0 | 0 | 1    | 0.016667 | 0.05722  | 0        | Unclassified | chr6:89819506-89822448    | 0.943    |
| 0610030E20Rik | 0 | 0 | 0 | 302  | 5.033333 | 5.35051  | 11.49478 | Unclassified | chr6:72295310-72303152    | 5.843    |
| V1ra4         | 0 | 0 | 0 | 0    | 0        | 0.016529 | 0        | Unclassified | chr6:89969881-89972814    | 0.934    |
| Dppa5a        | 0 | 0 | 0 | 0    | 0        | 0        | 0        | Unclassified | chr9:78214860-78218006    | 1.147    |
| Aut2          | 0 | 0 | 0 | 850  | 14.16667 | 0.181912 | 0.565789 | Unclassified | chr5:131913551-133020213  | 1104.663 |
| BC046331      | 0 | 0 | 0 | 573  | 9.55     | 4.79423  | 7.139056 | Unclassified | chr4:153347669-153381334  | 31.666   |
| Serpina3h     | 0 | 0 | 0 | 15   | 0.25     | 0.390748 | 2.037476 | Unclassified | chr12:105484114-105492615 | 6.502    |
| Khynyn        | 0 | 0 | 0 | 574  | 9.566667 | 15.1278  | 7.552148 | Unclassified | chr14:56501805-56515618   | 11.814   |
| Fam168a       | 0 | 0 | 0 | 390  | 6.5      | 2.47595  | 29.94612 | Stalled      | chr7:107853215-107990144  | 134.93   |
| Tmco5         | 0 | 0 | 0 | 15   | 0.25     | 0        | 1.03179  | Unclassified | chr2:116702443-116718230  | 13.788   |



|               |   |   |   |      |          |          |          |              |                           |         |
|---------------|---|---|---|------|----------|----------|----------|--------------|---------------------------|---------|
| Atp1b4        | 0 | 0 | 0 | 10   | 0.166667 | 0.022735 | 0        | Unclassified | chrX:35667443-35689890    | 20.448  |
| Nmral1        | 0 | 0 | 0 | 232  | 3.866667 | 25.7826  | 7.066009 | Unclassified | chr16:4711317-4721059     | 7.743   |
| Snap47        | 0 | 0 | 0 | 279  | 4.65     | 4.14323  | 44.14092 | Stalled      | chr11:59220651-59265458   | 42.808  |
| Wdr70         | 0 | 0 | 0 | 1057 | 17.61667 | 5.6242   | 28.61253 | Stalled      | chr15:7823054-8051209     | 226.156 |
| Lce1f         | 0 | 0 | 0 | 1    | 0.016667 | 0        | 1        | Unclassified | chr3:92522617-92526272    | 1.656   |
| Klhl34        | 0 | 0 | 0 | 2    | 0.033333 | 0.026494 | 0        | Unclassified | chrX:154254366-154258301  | 1.936   |
| Cnksr2        | 0 | 0 | 0 | 54   | 0.9      | 0.054417 | 0.815184 | Unclassified | chrX:154259504-154483042  | 221.539 |
| 1700093K21Rik | 0 | 0 | 0 | 9    | 0.15     | 0.199791 | 1.909772 | Unclassified | chr11:23416202-23421942   | 3.741   |
| Mrgprb2       | 0 | 0 | 0 | 2    | 0.033333 | 0.012359 | 0        | Unclassified | chr7:55806337-55815456    | 7.12    |
| Lrrc41        | 0 | 0 | 0 | 645  | 10.75    | 12.0377  | 14.10062 | Unclassified | chr4:115746069-115769648  | 21.58   |
| Olfir153      | 0 | 0 | 0 | 0    | 0        | 0        | 0        | Unclassified | chr2:87370191-87373115    | 0.925   |
| Dpy1914       | 0 | 0 | 0 | 400  | 6.666667 | 1.67076  | 39.72354 | Stalled      | chr4:11192225-11251278    | 57.054  |
| Sic6a13       | 0 | 0 | 0 | 58   | 0.966667 | 0.691485 | 0        | Unclassified | chr6:121248313-121287736  | 37.424  |
| Sic6a12       | 0 | 0 | 0 | 31   | 0.516667 | 0.080008 | 2.517944 | Unclassified | chr6:121294714-121315791  | 19.078  |
| Gad2          | 0 | 0 | 0 | 66   | 1.1      | 0.113923 | 0.520479 | Unclassified | chr2:22475846-22549397    | 17.552  |
| Gad1          | 0 | 0 | 0 | 77   | 1.283333 | 0.115034 | 2.545157 | Unclassified | chr2:70398220-70440069    | 39.85   |
| Them5         | 0 | 0 | 0 | 6    | 0.1      | 0.041045 | 0.515328 | Unclassified | chr3:94144020-94151272    | 5.253   |
| Lage3         | 0 | 0 | 0 | 91   | 1.516667 | 27.1015  | 22.30316 | Unclassified | chrX:71597500-71600957    | 1.458   |
| Cts6          | 0 | 0 | 0 | 7    | 0.116667 | 0.048437 | 0.591737 | Unclassified | chr13:61296507-61306753   | 8.247   |
| Acer3         | 0 | 0 | 0 | 246  | 4.1      | 1.2348   | 59.8575  | Stalled      | chr7:105362169-105460037  | 95.869  |
| Ppp1r14d      | 0 | 0 | 0 | 28   | 0.466667 | 0        | 0.617949 | Unclassified | chr2:119043858-119057588  | 11.731  |
| Fam187b       | 0 | 0 | 0 | 20   | 0.333333 | 0.025944 | 1.419901 | Unclassified | chr7:31760061-31774742    | 12.682  |
| 1700016D06Rik | 0 | 0 | 0 | 46   | 0.766667 | 0.131918 | 0        | Unclassified | chr8:11654923-11680750    | 23.828  |
| Mki2          | 0 | 0 | 0 | 829  | 13.81667 | 1.66967  | 30.456   | Stalled      | chr16:13254573-13417621   | 161.049 |
| 1700019E19Rik | 0 | 0 | 0 | 104  | 1.733333 | 1.03016  | 3.175853 | Unclassified | chr12:87421512-87503406   | 79.895  |
| Heatr3        | 0 | 0 | 0 | 730  | 12.16667 | 11.8287  | 22.87285 | Unclassified | chr8:90659783-90695842    | 34.06   |
| Clrn1         | 0 | 0 | 0 | 35   | 0.583333 | 0.015423 | 1.67141  | Unclassified | chr3:58649136-58691134    | 39.999  |
| Artn          | 0 | 0 | 0 | 28   | 0.466667 | 0.641536 | 2.139013 | Unclassified | chr4:117598766-117604368  | 3.603   |
| Rtbdn         | 0 | 0 | 0 | 56   | 0.933333 | 0.32914  | 0.734807 | Unclassified | chr8:87468889-87480502    | 9.614   |
| Rpl23a        | 0 | 0 | 0 | 487  | 8.116667 | 0        | 2.684778 | Elongating   | chr11:77994436-77999086   | 2.651   |
| Plekha7       | 0 | 0 | 0 | 126  | 2.1      | 0.267502 | 0.689573 | Unclassified | chr7:123267631-123335355  | 65.725  |
| Gatc          | 0 | 0 | 0 | 493  | 8.216667 | 11.5576  | 5.198479 | Unclassified | chr5:115783250-115793170  | 7.921   |
| Cybrd1        | 0 | 0 | 0 | 32   | 0.533333 | 0.226334 | 2.930883 | Unclassified | chr2:70954110-70980983    | 24.874  |
| Cbln4         | 0 | 0 | 0 | 6    | 0.1      | 0.031925 | 0        | Unclassified | chr2:171861835-171870966  | 7.132   |
| Tmem131       | 0 | 0 | 0 | 2267 | 37.78333 | 14.3293  | 13.60609 | Unclassified | chr1:36849033-36998372    | 147.34  |
| Capn9         | 0 | 0 | 0 | 45   | 0.75     | 0.060532 | 0.491852 | Unclassified | chr8:127098010-127142630  | 42.621  |
| Gpr171        | 0 | 0 | 0 | 164  | 2.733333 | 3.63961  | 2.798165 | Elongating   | chr3:58900369-58907743    | 5.375   |
| Psmid12       | 0 | 0 | 0 | 650  | 10.83333 | 39.2204  | 12.93877 | Unclassified | chr11:107338841-107359350 | 18.51   |
| Gpr116        | 0 | 0 | 0 | 75   | 1.25     | 0.040544 | 0.482854 | Unclassified | chr17:43524414-43596506   | 70.093  |
| Zcchc18       | 0 | 0 | 0 | 358  | 5.966667 | 35.4463  | 7.912276 | Unclassified | chrX:133525693-133531462  | 3.77    |
| Smarcd3       | 0 | 0 | 0 | 156  | 2.6      | 1.8496   | 0.105845 | Unclassified | chr5:24098439-24109820    | 9.382   |
| 2410004A20Rik | 0 | 0 | 0 | 24   | 0.4      | 0.790442 | 0.521458 | Unclassified | chr9:72948204-72952250    | 2.047   |
| Epb4.1i3      | 0 | 0 | 0 | 201  | 3.35     | 0.383381 | 1.200976 | Unclassified | chr17:69504149-69639327   | 133.179 |
| Epb4.1i2      | 0 | 0 | 0 | 780  | 13       | 20.7897  | 1.169849 | Unclassified | chr10:25126177-25243320   | 115.144 |
| Adam6b        | 0 | 0 | 0 | 11   | 0.183333 | 0.194481 | 0.965099 | Unclassified | chr12:114725775-114730046 | 2.272   |
| Med28         | 0 | 0 | 0 | 290  | 4.833333 | 5.52079  | 12.37207 | Unclassified | chr5:45909467-45920523    | 9.057   |
| Epb4.1i4a     | 0 | 0 | 0 | 748  | 12.46667 | 0.881199 | 0.661472 | Unclassified | chr18:33955980-34168860   | 210.881 |
| Kctd12b       | 0 | 0 | 0 | 3    | 0.05     | 0.096223 | 0        | Unclassified | chrX:150119696-150132823  | 11.128  |
| Apon          | 0 | 0 | 0 | 53   | 0.883333 | 0.14258  | 10.89165 | Unclassified | chr10:127689186-127692957 | 1.772   |
| BB014433      | 0 | 0 | 0 | 10   | 0.166667 | 0.021936 | 0        | Unclassified | chr8:15041446-15048069    | 4.624   |
| Phf8          | 0 | 0 | 0 | 563  | 9.383333 | 6.82254  | 97.76585 | Stalled      | chrX:147953214-148068400  | 113.187 |
| Reep3         | 0 | 0 | 0 | 941  | 15.68333 | 4.83841  | 21.67428 | Unclassified | chr10:66474255-66561605   | 85.351  |
| Sec24b        | 0 | 0 | 0 | 948  | 15.8     | 8.81152  | 15.59271 | Unclassified | chr3:129686102-129765825  | 77.724  |
| Foxe3         | 0 | 0 | 0 | 6    | 0.1      | 1.21946  | 2        | Unclassified | chr4:114597751-114600618  | 0.868   |
| Olfir983      | 0 | 0 | 0 | 0    | 0        | 0.040558 | 0        | Unclassified | chr9:39899601-39902549    | 0.949   |
| Pla2g16       | 0 | 0 | 0 | 158  | 2.633333 | 6.7577   | 7.677251 | Unclassified | chr19:7629948-7663035     | 31.088  |
| Sic6a15       | 0 | 0 | 0 | 30   | 0.5      | 0.028426 | 4.810596 | Unclassified | chr10:102828476-102882011 | 51.536  |
| Gbp5          | 0 | 0 | 0 | 125  | 2.083333 | 6.51707  | 4.81442  | Unclassified | chr3:142157897-142185308  | 25.412  |
| mmu-mir-132,r | 0 | 0 | 0 | 93   | 1.55     | 0        | 0.410033 | Unclassified | chr11:74984049-74988383   | 4.335   |
| mmu-mir-10a   | 0 | 0 | 0 | 151  | 2.516667 | 0        | 0        | Unclassified | chr11:96171527-96182538   | 11.012  |
| mmu-mir-146a  | 0 | 0 | 0 | 659  | 10.98333 | 0        | 0.145148 | Unclassified | chr11:43181736-43198279   | 16.544  |
| mmu-mir-345   | 0 | 0 | 0 | 199  | 3.316667 | 0        | 0.052306 | Unclassified | chr12:110071394-110075729 | 4.336   |
| mmu-mir-127   | 0 | 0 | 0 | 115  | 1.916667 | 0        | 0        | Unclassified | chr12:110785055-110876125 | 91.071  |
| mmu-mir-203   | 0 | 0 | 0 | 28   | 0.466667 | 0        | 1.316565 | Unclassified | chr12:113363875-113372380 | 8.506   |
| mmu-let-7d    | 0 | 0 | 0 | 682  | 11.36667 | 0        | 6.933697 | Unclassified | chr13:48622217-48641391   | 19.175  |
| mmu-mir-18a,r | 0 | 0 | 0 | 992  | 16.53333 | 0        | 2.255574 | Elongating   | chr14:115441231-115450982 | 9.752   |
| mmu-mir-30b,r | 0 | 0 | 0 | 144  | 2.4      | 0        | 0        | Unclassified | chr15:68192662-68196997   | 4.336   |
| mmu-mir-484   | 0 | 0 | 0 | 255  | 4.25     | 0        | 0.044112 | Unclassified | chr16:14156390-14161090   | 4.701   |
| mmu-mir-181b  | 0 | 0 | 0 | 222  | 3.7      | 0        | 0.811758 | Unclassified | chr1:139800356-139951650  | 151.295 |
| mmu-mir-206   | 0 | 0 | 0 | 1    | 0.016667 | 0        | 0        | Unclassified | chr1:20663103-20665103    | 2.001   |
| mmu-mir-30a   | 0 | 0 | 0 | 8    | 0.133333 | 0        | 0        | Unclassified | chr1:23259127-23270134    | 11.008  |
| mmu-mir-296,r | 0 | 0 | 0 | 410  | 6.833333 | 0        | 0.107481 | Unclassified | chr2:174110103-174126114  | 16.012  |
| mmu-mir-130a  | 0 | 0 | 0 | 39   | 0.65     | 0        | 0.283168 | Unclassified | chr2:84571797-84587807    | 16.011  |
| mmu-mir-92b   | 0 | 0 | 0 | 164  | 2.733333 | 0        | 0.13956  | Unclassified | chr3:89030179-89034087    | 3.909   |
| mmu-mir-31    | 0 | 0 | 0 | 8    | 0.133333 | 0        | 0.240451 | Unclassified | chr4:88582545-88585760    | 3.216   |
| mmu-mir-182,r | 0 | 0 | 0 | 58   | 0.966667 | 0        | 0.057186 | Unclassified | chr6:30122126-30126461    | 4.336   |
| mmu-mir-148a  | 0 | 0 | 0 | 195  | 3.25     | 0        | 0        | Unclassified | chr6:51220214-51224358    | 4.145   |
| mmu-mir-34c   | 0 | 0 | 0 | 16   | 0.266667 | 0        | 0        | Unclassified | chr9:50909675-50914010    | 4.336   |
| mmu-mir-184   | 0 | 0 | 0 | 33   | 0.55     | 0        | 0        | Unclassified | chr9:89677617-89708639    | 31.023  |
| mmu-mir-223   | 0 | 0 | 0 | 1    | 0.016667 | 0        | 0        | Unclassified | chrX:93434281-93438975    | 4.695   |
| mmu-mir-221,r | 0 | 0 | 0 | 177  | 2.95     | 0        | 0        | Unclassified | chrX:18715959-18746990    | 31.032  |
| mmu-mir-20b,r | 0 | 0 | 0 | 199  | 3.316667 | 0        | 0        | Unclassified | chrX:50094475-50100700    | 6.226   |
| mmu-mir-322   | 0 | 0 | 0 | 195  | 3.25     | 0        | 0        | Unclassified | chrX:50096213-50100547    | 4.335   |
| mmu-mir-542,r | 0 | 0 | 0 | 30   | 0.5      | 0        | 0        | Unclassified | chrX:50407293-50414965    | 7.673   |

**Table S2:** Mutation analysis of 19 AID recruiting (AID+) and 11 AID non-recruiting (AID-) genes  
 Each gene was analyzed using DNA isolated from IgκAID/UNG<sup>-/-</sup> or AID<sup>-/-</sup> activated B cells (LPS+IL-4)  
 bp: total number of bp sequenced  
 Mutations: total number of mutations detected  
 P value was calculated between the mutation frequency obtained in *Aicda*<sup>+/+</sup> and *Aicda*<sup>-/-</sup>  
 q value: statistical comparison between *IgκAID-Ung*<sup>-/-</sup> and *Aicda*<sup>-/-</sup> mutation frequency

| Gene                 | Strain                   | bp sequenced                                                                     | Mutations                                                                       | Transitions at C-G (%) | RGYW-WRCY hotspot (% total mutations) | <i>IgκAID-Ung</i> <sup>-/-</sup> Mutation frequency (x 10 <sup>-5</sup> ) | <i>Aicda</i> <sup>-/-</sup> Mutation frequency (x 10 <sup>-5</sup> ) | P value         | q value           | mRNA RPKM     | <i>Ung</i> <sup>-/-</sup> <i>Msh2</i> <sup>-/-</sup> Mutation frequency (x10 <sup>-5</sup> ). Reference 12 | <i>IgκAID-Ung</i> <sup>-/-</sup> Mutation frequency (x 10 <sup>-5</sup> ) |
|----------------------|--------------------------|----------------------------------------------------------------------------------|---------------------------------------------------------------------------------|------------------------|---------------------------------------|---------------------------------------------------------------------------|----------------------------------------------------------------------|-----------------|-------------------|---------------|------------------------------------------------------------------------------------------------------------|---------------------------------------------------------------------------|
| AID recruiting genes | <i>Pim1</i>              | <i>IgκAID-Ung</i> <sup>-/-</sup> : 20453<br><i>Aicda</i> <sup>-/-</sup> : 17219  | 41<br>1                                                                         | 92.7<br>0              | 39<br>0                               | <b>200.5</b>                                                              | <b>5.8</b>                                                           | <b>3.64E-10</b> | <b>4.24E-09</b>   | <b>139.6</b>  | <b>90.5</b>                                                                                                | <b>48.9</b>                                                               |
|                      | <i>Mir142</i>            | <i>IgκAID-Ung</i> <sup>-/-</sup> : 21551<br><i>Aicda</i> <sup>-/-</sup> : 23676  | 43<br>1                                                                         | 100<br>0               | 32.6<br>0                             | <b>199.5</b>                                                              | <b>4.22</b>                                                          | <b>3.30E-13</b> | <b>5.78E-12</b>   | ND            |                                                                                                            | <b>58.8*</b>                                                              |
|                      | <i>Myc</i>               | <i>IgκAID-Ung</i> <sup>-/-</sup> : 103818<br><i>Aicda</i> <sup>-/-</sup> : 19136 | 171<br>3                                                                        | 99.4<br>100            | 39<br>33.3                            | <b>164.7</b>                                                              | <b>15.7</b>                                                          | <b>2.17E-06</b> | <b>0.0000147</b>  | <b>53.5</b>   | <b>94.2</b>                                                                                                | <b>14.3*</b>                                                              |
|                      | <i>Ii4ra</i>             | <i>IgκAID-Ung</i> <sup>-/-</sup> : 29062<br><i>Aicda</i> <sup>-/-</sup> : 25257  | 35<br>2                                                                         | 100<br>100             | 48.6<br>0                             | <b>120</b>                                                                | <b>7.92</b>                                                          | <b>5.36E-08</b> | <b>4.693E-07</b>  | <b>132.9</b>  |                                                                                                            | <b>19.8</b>                                                               |
|                      | <i>Grp</i>               | <i>IgκAID-Ung</i> <sup>-/-</sup> : 19084<br><i>Aicda</i> <sup>-/-</sup> : 12402  | 19<br>0                                                                         | 95<br>0                | 36.8<br>0                             | <b>99.6</b>                                                               | <b>&lt;1</b>                                                         | <b>0.000155</b> | <b>0.0005411</b>  | <b>154.8</b>  |                                                                                                            |                                                                           |
|                      | <i>Pax5</i>              | <i>IgκAID-Ung</i> <sup>-/-</sup> : 114476<br><i>Aicda</i> <sup>-/-</sup> : 28035 | 81<br>4                                                                         | 96.3<br>0              | 48.1<br>0                             | <b>70.70</b>                                                              | <b>14.27</b>                                                         | <b>0.0009</b>   | <b>0.0001578</b>  | <b>54</b>     | <b>87.8</b>                                                                                                |                                                                           |
|                      | <i>Hist1h1c</i>          | <i>IgκAID-Ung</i> <sup>-/-</sup> : 42680<br><i>Aicda</i> <sup>-/-</sup> : 34266  | 34<br>3                                                                         | 100<br>33.3            | 34.3<br>0                             | <b>79.7</b>                                                               | <b>8.8</b>                                                           | <b>2.52E-06</b> | <b>1.471E-05</b>  | <b>16.4</b>   |                                                                                                            |                                                                           |
|                      | <i>Ly6e</i>              | <i>IgκAID-Ung</i> <sup>-/-</sup> : 20583<br><i>Aicda</i> <sup>-/-</sup> : 13546  | 13<br>0                                                                         | 92.3<br>0              | 46.2<br>0                             | <b>63.2</b>                                                               | <b>&lt;1</b>                                                         | <b>0.00261</b>  | <b>0.006526</b>   | <b>265.9</b>  |                                                                                                            |                                                                           |
|                      | <i>Cd83</i>              | <i>IgκAID-Ung</i> <sup>-/-</sup> : 11577<br><i>Aicda</i> <sup>-/-</sup> : 38378  | 7<br>0                                                                          | 85.7<br>0              | 28.6<br>0                             | <b>60.5</b>                                                               | <b>&lt;1</b>                                                         | <b>3.59E-05</b> | <b>0.0001578</b>  | <b>111.5</b>  | <b>51.2</b>                                                                                                |                                                                           |
|                      | <i>H2afx</i>             | <i>IgκAID-Ung</i> <sup>-/-</sup> : 23611<br><i>Aicda</i> <sup>-/-</sup> : 18630  | 12<br>0                                                                         | 91.7<br>0              | 41.7<br>0                             | <b>55.1</b>                                                               | <b>&lt;1</b>                                                         | <b>0.001806</b> | <b>0.0048616</b>  | <b>55.4</b>   | <b>44.7</b>                                                                                                |                                                                           |
|                      | <i>Gadd45g</i>           | <i>IgκAID-Ung</i> <sup>-/-</sup> : 23728<br><i>Aicda</i> <sup>-/-</sup> : 27482  | 13<br>1                                                                         | 100<br>100             | 53.9<br>0                             | <b>54.8</b>                                                               | <b>3.6</b>                                                           | <b>0.000525</b> | <b>0.0016718</b>  | <b>115.4</b>  |                                                                                                            |                                                                           |
|                      | <i>Ii4i1</i>             | <i>IgκAID-Ung</i> <sup>-/-</sup> : 41757<br><i>Aicda</i> <sup>-/-</sup> : 55503  | 14<br>3                                                                         | 100<br>100             | 43.7<br>33.3                          | <b>38.3</b>                                                               | <b>5.4</b>                                                           | <b>0.001136</b> | <b>0.0033128</b>  | <b>362.1</b>  |                                                                                                            |                                                                           |
|                      | <i>Adrbk1</i>            | <i>IgκAID-Ung</i> <sup>-/-</sup> : 23333<br><i>Aicda</i> <sup>-/-</sup> : 17277  | 8<br>0                                                                          | 100<br>0               | 37.5<br>0                             | <b>34.3</b>                                                               | <b>&lt;1</b>                                                         | <b>0.024532</b> | <b>0.050507</b>   | <b>97.8</b>   |                                                                                                            |                                                                           |
|                      | <i>Hvcn1</i>             | <i>IgκAID-Ung</i> <sup>-/-</sup> : 24912<br><i>Aicda</i> <sup>-/-</sup> : 21033  | 8<br>3                                                                          | 87.5<br>0              | 50<br>0                               | <b>32.1</b>                                                               | <b>14.3</b>                                                          | <b>0.244755</b> | <b>0.3942284</b>  | <b>89.9</b>   |                                                                                                            |                                                                           |
|                      | <i>Actb</i>              | <i>IgκAID-Ung</i> <sup>-/-</sup> : 25984<br><i>Aicda</i> <sup>-/-</sup> : 23858  | 7<br>0                                                                          | 100<br>0               | 85.7<br>0                             | <b>26.9</b>                                                               | <b>&lt;1</b>                                                         | <b>0.016217</b> | <b>0.0369386</b>  | <b>759.7</b>  |                                                                                                            |                                                                           |
|                      | <i>Ucp2</i>              | <i>IgκAID-Ung</i> <sup>-/-</sup> : 22139<br><i>Aicda</i> <sup>-/-</sup> : 27937  | 5<br>0                                                                          | 100<br>0               | 40<br>0                               | <b>22.6</b>                                                               | <b>&lt;1</b>                                                         | <b>0.016886</b> | <b>0.0369386</b>  | <b>103</b>    |                                                                                                            |                                                                           |
|                      | <i>Pip5k1c</i>           | <i>IgκAID-Ung</i> <sup>-/-</sup> : 36102<br><i>Aicda</i> <sup>-/-</sup> : 56600  | 6<br>1                                                                          | 83.3<br>0              | 33.3<br>0                             | <b>16.6</b>                                                               | <b>1.8</b>                                                           | <b>0.0316</b>   | <b>0.0369386</b>  | <b>45</b>     |                                                                                                            |                                                                           |
|                      | <i>Dpagt1</i>            | <i>IgκAID-Ung</i> <sup>-/-</sup> : 26430<br><i>Aicda</i> <sup>-/-</sup> : 48791  | 4<br>1                                                                          | 50<br>0                | 50<br>100                             | <b>15.1</b>                                                               | <b>2.1</b>                                                           | <b>0.054781</b> | <b>0.1065182</b>  | <b>14.3</b>   |                                                                                                            |                                                                           |
|                      | <i>Trex1</i>             | <i>IgκAID-Ung</i> <sup>-/-</sup> : 34574<br><i>Aicda</i> <sup>-/-</sup> : 27625  | 3<br>0                                                                          | 100<br>0               | 0<br>0                                | <b>8.68</b>                                                               | <b>&lt;1</b>                                                         | <b>0.259349</b> | <b>0.3946622</b>  | <b>34.3</b>   |                                                                                                            |                                                                           |
|                      | non-AID recruiting genes | <i>N-myc</i>                                                                     | <i>IgκAID-Ung</i> <sup>-/-</sup> : 45462<br><i>Aicda</i> <sup>-/-</sup> : 31251 | 0<br>0                 | 0<br>0                                | 0<br>0                                                                    | <b>&lt;1</b>                                                         | <b>&lt;1</b>    | <b>1</b>          | <b>1</b>      | <b>0.51</b>                                                                                                |                                                                           |
| <i>Hmbs</i>          |                          | <i>IgκAID-Ung</i> <sup>-/-</sup> : 28566<br><i>Aicda</i> <sup>-/-</sup> : 34058  | 2<br>0                                                                          | 50<br>0                | 0<br>0                                | <b>7.00</b>                                                               | <b>&lt;1</b>                                                         | <b>0.20807</b>  | <b>0.3641221</b>  | <b>13.3</b>   |                                                                                                            |                                                                           |
| <i>Rpl4</i>          |                          | <i>IgκAID-Ung</i> <sup>-/-</sup> : 34352<br><i>Aicda</i> <sup>-/-</sup> : 30600  | 2<br>0                                                                          | 50<br>0                | 0<br>0                                | <b>5.82</b>                                                               | <b>&lt;1</b>                                                         | <b>0.501661</b> | <b>0.6096906</b>  | <b>1260.1</b> |                                                                                                            |                                                                           |
| <i>Eif3h</i>         |                          | <i>IgκAID-Ung</i> <sup>-/-</sup> : 33048<br><i>Aicda</i> <sup>-/-</sup> : 30948  | 2<br>0                                                                          | 100<br>0               | 0<br>0                                | <b>6.05</b>                                                               | <b>&lt;1</b>                                                         | <b>0.500531</b> | <b>0.6096906</b>  | <b>141.8</b>  |                                                                                                            |                                                                           |
| <i>Gdi2</i>          |                          | <i>IgκAID-Ung</i> <sup>-/-</sup> : 31044<br><i>Aicda</i> <sup>-/-</sup> : 30772  | 0<br>2                                                                          | 0<br>0                 | 0<br>0                                | <b>&lt;1</b>                                                              | <b>6.5</b>                                                           | <b>0.247801</b> | <b>0.3942284</b>  | <b>74.2</b>   |                                                                                                            |                                                                           |
| <i>Rbbp7</i>         |                          | <i>IgκAID-Ung</i> <sup>-/-</sup> : 22472<br><i>Aicda</i> <sup>-/-</sup> : 26602  | 1<br>0                                                                          | 0<br>0                 | 0<br>0                                | <b>4.44</b>                                                               | <b>&lt;1</b>                                                         | <b>0.457921</b> | <b>0.6096906</b>  | <b>52.3</b>   |                                                                                                            |                                                                           |
| <i>Sfrs9</i>         |                          | <i>IgκAID-Ung</i> <sup>-/-</sup> : 32871<br><i>Aicda</i> <sup>-/-</sup> : 37790  | 3<br>2                                                                          | 100<br>50              | 66.6<br>0                             | <b>9.12</b>                                                               | <b>5.29</b>                                                          | <b>0.668967</b> | <b>0.7552852</b>  | <b>61.9</b>   |                                                                                                            |                                                                           |
| <i>Cdc42</i>         |                          | <i>IgκAID-Ung</i> <sup>-/-</sup> : 28015<br><i>Aicda</i> <sup>-/-</sup> : 22838  | 2<br>0                                                                          | 50<br>0                | 50<br>0                               | <b>7.14</b>                                                               | <b>&lt;1</b>                                                         | <b>0.505172</b> | <b>0.6096906</b>  | <b>71.8</b>   |                                                                                                            |                                                                           |
| <i>Crk</i>           |                          | <i>IgκAID-Ung</i> <sup>-/-</sup> : 27511<br><i>Aicda</i> <sup>-/-</sup> : 28215  | 1<br>1                                                                          | 0<br>0                 | 0<br>0                                | <b>3.63</b>                                                               | <b>3.54</b>                                                          | <b>1</b>        | <b>1</b>          | <b>14</b>     |                                                                                                            |                                                                           |
| <i>Lman1</i>         |                          | <i>IgκAID-Ung</i> <sup>-/-</sup> : 29569<br><i>Aicda</i> <sup>-/-</sup> : 36662  | 3<br>1                                                                          | 100<br>100             | 0<br>0                                | <b>10.14</b>                                                              | <b>2.72</b>                                                          | <b>0.330639</b> | <b>0.4628943</b>  | <b>23.4</b>   |                                                                                                            |                                                                           |
| <i>Fam50a</i>        |                          | <i>IgκAID-Ung</i> <sup>-/-</sup> : 34086<br><i>Aicda</i> <sup>-/-</sup> : 32154  | 1<br>2                                                                          | 100<br>50              | 0<br>0                                | <b>2.93</b>                                                               | <b>6.22</b>                                                          | <b>0.614385</b> | <b>0.7167821</b>  | <b>21.5</b>   |                                                                                                            |                                                                           |
| Ig genes             |                          | <i>IgSμ</i>                                                                      | <i>IgκAID-Ung</i> <sup>-/-</sup> : 26101<br><i>Aicda</i> <sup>-/-</sup> : 26369 | 521<br>0               | 99.0<br>0                             | 61.2<br>0                                                                 | <b>1996</b>                                                          | <b>&lt;1</b>    | <b>&lt;0.0001</b> |               |                                                                                                            | <b>510*</b>                                                               |
|                      |                          | <i>IgCμ</i>                                                                      | <i>IgκAID-Ung</i> <sup>-/-</sup> : 45906<br><i>Aicda</i> <sup>-/-</sup> : 25726 | 4<br>0                 | 50.0<br>0                             | 0<br>0                                                                    | <b>8.71</b>                                                          | <b>&lt;1</b>    | <b>0.329</b>      |               |                                                                                                            |                                                                           |
|                      |                          | <i>IgSy1</i>                                                                     | <i>IgκAID-Ung</i> <sup>-/-</sup> : 18255<br><i>Aicda</i> <sup>-/-</sup> : 28270 | 286<br>0               | 100<br>0                              | 58.7<br>0                                                                 | <b>1567</b>                                                          | <b>&lt;1</b>    | <b>&lt;0.0001</b> |               |                                                                                                            |                                                                           |
|                      |                          | <i>Ih4 intron</i>                                                                | <i>IgκAID-Ung</i> <sup>-/-</sup> : 17223<br><i>Aicda</i> <sup>-/-</sup> : 14640 | 26<br>2                | 96<br>0                               | 58<br>0                                                                   | <b>151.0</b>                                                         | <b>13.7</b>     | <b>&lt;0.0001</b> |               | <b>2200</b>                                                                                                |                                                                           |

\*data from Robianni et al. (2009)

**Table S3:** Euclidean distance matrix: AID, RNA PolII, CTCF, p300, 36 chromatin modifications from B lymphocytes stimulated for 6  
Data was normalized as sequence tags per million, and log2 transformed  
Binding regions were defined based on 7019 AID islands

| Variable  | AID   | H2A Z | H2AK9Ac | H2B K12Ac | H2B K5Ac | H2BK120Ac | H2BK20Ac | H2BK5me1 | H3K14Ac | H3K18Ac | H3K23Ac | H3K27Ac |
|-----------|-------|-------|---------|-----------|----------|-----------|----------|----------|---------|---------|---------|---------|
| AID       | 0.00  | 14.84 | 10.03   | 8.61      | 8.00     | 7.57      | 7.99     | 14.77    | 13.13   | 8.79    | 12.88   | 8.21    |
| H3K4me1   | 7.48  | 14.02 | 9.22    | 7.49      | 7.62     | 6.84      | 6.94     | 13.73    | 12.20   | 7.63    | 11.93   | 7.54    |
| H2BK120Ac | 7.57  | 14.70 | 7.80    | 5.33      | 5.93     | 0.00      | 5.15     | 14.71    | 12.31   | 6.08    | 11.78   | 5.94    |
| H4K8Ac    | 7.71  | 13.69 | 7.10    | 6.32      | 5.41     | 5.74      | 6.63     | 13.66    | 11.34   | 6.47    | 10.96   | 5.31    |
| H3K4me2   | 7.90  | 15.32 | 8.33    | 7.14      | 6.47     | 5.79      | 7.29     | 15.32    | 12.98   | 7.49    | 12.22   | 6.38    |
| H2BK20Ac  | 7.99  | 13.81 | 8.13    | 5.35      | 7.15     | 5.15      | 0.00     | 13.78    | 11.52   | 6.04    | 11.33   | 7.04    |
| H2B K5Ac  | 8.00  | 14.72 | 7.34    | 6.88      | 0.00     | 5.93      | 7.15     | 14.61    | 12.21   | 7.05    | 11.63   | 4.71    |
| H3K4me3   | 8.12  | 14.17 | 7.28    | 6.88      | 6.36     | 6.01      | 7.29     | 14.24    | 11.87   | 7.04    | 11.27   | 5.65    |
| H3K27Ac   | 8.21  | 13.45 | 6.40    | 6.44      | 4.71     | 5.94      | 7.04     | 13.45    | 11.11   | 6.56    | 10.63   | 0.00    |
| H3K4Ac    | 8.59  | 13.97 | 6.26    | 5.58      | 5.34     | 5.20      | 6.48     | 14.07    | 11.43   | 6.00    | 11.00   | 4.94    |
| H2B K12Ac | 8.61  | 13.25 | 7.14    | 0.00      | 6.88     | 5.33      | 5.35     | 13.32    | 10.90   | 5.60    | 10.71   | 6.44    |
| H4K91Ac   | 8.70  | 13.11 | 5.85    | 5.42      | 5.98     | 5.67      | 6.43     | 13.27    | 10.63   | 5.91    | 10.44   | 5.15    |
| H3K18Ac   | 8.79  | 12.99 | 7.06    | 5.60      | 7.05     | 6.08      | 6.04     | 12.99    | 10.54   | 0.00    | 10.44   | 6.56    |
| H3K9Ac    | 9.03  | 14.27 | 6.49    | 6.72      | 5.49     | 6.01      | 7.51     | 14.41    | 11.76   | 6.99    | 11.02   | 4.94    |
| Pol II    | 9.49  | 13.99 | 8.23    | 9.42      | 7.28     | 8.98      | 9.88     | 14.04    | 12.09   | 9.39    | 11.09   | 7.34    |
| H3K36Ac   | 9.87  | 11.98 | 6.95    | 6.34      | 8.12     | 7.59      | 6.97     | 12.05    | 9.46    | 6.29    | 9.87    | 7.34    |
| H2AK9Ac   | 10.03 | 11.88 | 0.00    | 7.14      | 7.34     | 7.80      | 8.13     | 12.13    | 9.53    | 7.06    | 9.33    | 6.40    |
| H4K5Ac    | 10.75 | 11.00 | 6.19    | 7.72      | 8.67     | 8.93      | 8.67     | 11.23    | 8.39    | 7.55    | 8.95    | 7.68    |
| H3K79me1  | 11.05 | 10.78 | 8.66    | 9.84      | 9.69     | 10.39     | 10.23    | 10.42    | 9.73    | 9.60    | 9.06    | 8.90    |
| CTCF      | 11.11 | 11.68 | 10.96   | 11.41     | 11.96    | 11.66     | 11.45    | 12.01    | 11.53   | 11.52   | 11.27   | 11.38   |
| H4K12Ac   | 11.35 | 10.23 | 8.08    | 9.58      | 10.03    | 10.58     | 10.09    | 10.37    | 8.42    | 9.30    | 8.68    | 9.15    |
| H3K79me2  | 11.61 | 10.18 | 8.21    | 9.71      | 10.20    | 10.53     | 10.25    | 10.05    | 8.88    | 9.39    | 8.47    | 9.17    |
| H3K36me2  | 11.66 | 10.37 | 9.78    | 9.35      | 11.13    | 10.58     | 9.54     | 9.93     | 9.28    | 9.15    | 9.92    | 10.36   |
| p300      | 11.78 | 10.40 | 8.28    | 9.79      | 10.35    | 10.58     | 10.38    | 10.80    | 9.43    | 9.65    | 9.24    | 9.56    |
| H3K36me3  | 11.97 | 10.55 | 11.84   | 12.63     | 12.26    | 13.15     | 12.57    | 9.83     | 10.56   | 12.30   | 10.39   | 11.92   |
| H3K36me1  | 12.27 | 9.37  | 11.65   | 11.71     | 13.12    | 12.54     | 11.83    | 9.00     | 9.98    | 11.38   | 10.36   | 12.22   |
| H3K9me1   | 12.83 | 8.74  | 11.68   | 12.05     | 12.97    | 13.13     | 12.22    | 7.66     | 9.32    | 11.69   | 10.01   | 12.14   |
| H3K23Ac   | 12.88 | 9.10  | 9.33    | 10.71     | 11.63    | 11.78     | 11.33    | 9.10     | 7.88    | 10.44   | 0.00    | 10.63   |
| H3K14Ac   | 13.13 | 8.07  | 9.53    | 10.90     | 12.21    | 12.31     | 11.52    | 8.22     | 0.00    | 10.54   | 7.88    | 11.11   |
| H3K27me1  | 13.84 | 7.07  | 12.23   | 13.31     | 14.13    | 14.50     | 13.60    | 6.45     | 9.07    | 13.02   | 9.78    | 13.16   |
| H4K20me1  | 13.93 | 6.87  | 12.64   | 13.68     | 14.53    | 14.79     | 13.87    | 6.31     | 9.22    | 13.34   | 9.84    | 13.54   |
| H3K79me3  | 14.43 | 5.69  | 11.27   | 12.87     | 14.16    | 14.22     | 13.44    | 6.17     | 7.86    | 12.57   | 8.52    | 12.90   |
| H3K27me3  | 14.53 | 6.35  | 13.09   | 13.80     | 15.60    | 15.05     | 14.08    | 6.59     | 9.28    | 13.61   | 10.02   | 14.37   |
| H2BK5me1  | 14.77 | 5.30  | 12.13   | 13.32     | 14.61    | 14.71     | 13.78    | 0.00     | 8.22    | 12.99   | 9.10    | 13.45   |
| H2A.Z     | 14.84 | 0.00  | 11.88   | 13.25     | 14.72    | 14.70     | 13.81    | 5.30     | 8.07    | 12.99   | 9.10    | 13.45   |
| H3K27me2  | 15.13 | 4.13  | 12.31   | 13.56     | 15.13    | 15.09     | 14.09    | 4.43     | 7.90    | 13.29   | 9.11    | 13.85   |
| H4K20me3  | 15.13 | 4.00  | 12.33   | 13.67     | 15.21    | 15.18     | 14.19    | 4.46     | 8.01    | 13.41   | 9.27    | 13.94   |
| H3K9me3   | 15.17 | 4.15  | 12.34   | 13.64     | 15.18    | 15.14     | 14.13    | 4.33     | 7.98    | 13.36   | 9.19    | 13.92   |
| H3K9me2   | 15.18 | 3.86  | 12.35   | 13.69     | 15.23    | 15.22     | 14.22    | 4.28     | 7.95    | 13.44   | 9.20    | 13.95   |
| H4K16Ac   | 15.23 | 3.77  | 12.28   | 13.63     | 15.17    | 15.15     | 14.15    | 4.13     | 7.86    | 13.38   | 9.08    | 13.88   |

| Variable  | H3K27me1 | H3K27me2 | H3K27me3 | H3K36Ac | H3K36me1 | H3K36me2 | H3K36me3 | H3K4Ac | H3K4me1 | H3K4me2 | H3K4me3 | H3K79me1 |
|-----------|----------|----------|----------|---------|----------|----------|----------|--------|---------|---------|---------|----------|
| AID       | 13.84    | 15.13    | 14.53    | 9.87    | 12.27    | 11.66    | 11.97    | 8.59   | 7.48    | 7.90    | 8.12    | 11.05    |
| H3K4me1   | 13.32    | 14.27    | 14.09    | 8.71    | 11.30    | 9.71     | 12.03    | 7.63   | 0.00    | 6.91    | 7.23    | 9.89     |
| H2BK120Ac | 14.50    | 15.09    | 15.05    | 7.59    | 12.54    | 10.58    | 13.15    | 5.20   | 6.84    | 5.79    | 6.01    | 10.39    |
| H4K8Ac    | 13.38    | 14.04    | 14.40    | 7.43    | 12.05    | 10.16    | 12.01    | 5.34   | 7.06    | 6.38    | 6.15    | 9.45     |
| H3K4me2   | 15.23    | 15.76    | 15.32    | 8.91    | 12.96    | 11.58    | 13.76    | 5.70   | 6.91    | 0.00    | 4.30    | 10.71    |
| H2BK20Ac  | 13.60    | 14.09    | 14.08    | 6.97    | 11.83    | 9.54     | 12.57    | 6.48   | 6.94    | 7.29    | 7.29    | 10.23    |
| H2B K5Ac  | 14.13    | 15.13    | 15.60    | 8.12    | 13.12    | 11.13    | 12.26    | 5.34   | 7.62    | 6.47    | 6.36    | 9.69     |
| H3K4me3   | 14.22    | 14.61    | 14.42    | 8.25    | 12.35    | 11.06    | 13.03    | 5.23   | 7.23    | 4.30    | 0.00    | 9.82     |
| H3K27Ac   | 13.16    | 13.85    | 14.37    | 7.34    | 12.22    | 10.36    | 11.92    | 4.94   | 7.54    | 6.38    | 5.65    | 8.90     |
| H3K4Ac    | 14.05    | 14.40    | 14.74    | 7.02    | 12.46    | 10.38    | 13.03    | 0.00   | 7.63    | 5.70    | 5.23    | 9.74     |
| H2B K12Ac | 13.31    | 13.56    | 13.80    | 6.34    | 11.71    | 9.35     | 12.63    | 5.58   | 7.49    | 7.14    | 6.88    | 9.84     |
| H4K91Ac   | 13.23    | 13.47    | 14.01    | 6.37    | 11.99    | 9.77     | 12.61    | 4.35   | 7.91    | 6.70    | 6.00    | 9.43     |
| H3K18Ac   | 13.02    | 13.29    | 13.61    | 6.29    | 11.38    | 9.15     | 12.30    | 6.00   | 7.63    | 7.49    | 7.04    | 9.60     |
| H3K9Ac    | 14.38    | 14.79    | 15.02    | 8.00    | 12.91    | 11.24    | 13.04    | 4.54   | 8.29    | 5.49    | 5.12    | 9.70     |
| Pol II    | 13.72    | 14.47    | 14.88    | 10.03   | 13.50    | 12.50    | 11.24    | 8.20   | 10.06   | 8.90    | 8.37    | 9.26     |
| H3K36Ac   | 12.17    | 12.17    | 12.77    | 0.00    | 11.16    | 8.71     | 12.04    | 7.02   | 8.71    | 8.91    | 8.25    | 9.58     |
| H2AK9Ac   | 12.23    | 12.31    | 13.09    | 6.95    | 11.65    | 9.78     | 11.84    | 6.26   | 9.22    | 8.33    | 7.28    | 8.66     |
| H4K5Ac    | 11.47    | 11.18    | 12.19    | 6.56    | 11.19    | 9.11     | 11.67    | 7.64   | 9.83    | 9.62    | 8.60    | 9.18     |
| H3K79me1  | 10.41    | 11.03    | 11.89    | 9.58    | 10.87    | 10.15    | 9.65     | 9.74   | 9.89    | 10.71   | 9.82    | 0.00     |
| CTCF      | 12.05    | 12.04    | 11.85    | 11.51   | 11.69    | 12.06    | 11.93    | 11.63  | 11.56   | 11.83   | 11.36   | 11.08    |
| H4K12Ac   | 10.26    | 10.43    | 11.46    | 8.59    | 10.93    | 9.61     | 10.16    | 9.70   | 10.46   | 11.21   | 10.19   | 8.61     |
| H3K79me2  | 10.37    | 10.29    | 11.37    | 9.12    | 10.89    | 9.64     | 10.11    | 9.74   | 10.66   | 11.06   | 10.02   | 7.81     |
| H3K36me2  | 10.31    | 10.05    | 10.92    | 8.71    | 9.65     | 0.00     | 11.36    | 10.38  | 9.71    | 11.58   | 11.06   | 10.15    |
| p300      | 11.37    | 10.74    | 11.37    | 9.35    | 11.37    | 10.42    | 11.33    | 9.65   | 11.18   | 10.95   | 10.08   | 9.44     |
| H3K36me3  | 9.02     | 10.31    | 11.12    | 12.04   | 11.32    | 11.36    | 0.00     | 13.03  | 12.03   | 13.76   | 13.03   | 9.65     |
| H3K36me1  | 9.45     | 9.16     | 9.38     | 11.16   | 0.00     | 9.65     | 11.32    | 12.46  | 11.30   | 12.96   | 12.35   | 10.87    |
| H3K9me1   | 7.58     | 8.22     | 9.37     | 11.17   | 8.97     | 9.14     | 9.12     | 12.86  | 11.73   | 13.85   | 13.04   | 9.92     |
| H3K23Ac   | 9.78     | 9.11     | 10.02    | 9.87    | 10.36    | 9.92     | 10.39    | 11.00  | 11.93   | 12.22   | 11.27   | 9.06     |
| H3K14Ac   | 9.07     | 7.90     | 9.28     | 9.46    | 9.98     | 9.28     | 10.56    | 11.43  | 12.20   | 12.98   | 11.87   | 9.73     |
| H3K27me1  | 0.00     | 6.48     | 8.31     | 12.17   | 9.45     | 10.31    | 9.02     | 14.05  | 13.32   | 15.23   | 14.22   | 10.41    |
| H4K20me1  | 6.74     | 6.25     | 7.54     | 12.60   | 9.34     | 10.67    | 9.08     | 14.45  | 13.50   | 15.36   | 14.38   | 10.49    |
| H3K79me3  | 7.65     | 5.33     | 7.23     | 11.66   | 9.86     | 10.39    | 9.84     | 13.43  | 13.79   | 14.83   | 13.60   | 10.22    |
| H3K27me3  | 8.31     | 5.69     | 0.00     | 12.77   | 9.38     | 10.92    | 11.12    | 14.74  | 14.09   | 15.32   | 14.42   | 11.89    |
| H2BK5me1  | 6.45     | 4.43     | 6.59     | 12.05   | 9.00     | 9.93     | 9.83     | 14.07  | 13.73   | 15.32   | 14.24   | 10.42    |
| H2A.Z     | 7.07     | 4.13     | 6.35     | 11.98   | 9.37     | 10.37    | 10.55    | 13.97  | 14.02   | 15.32   | 14.17   | 10.78    |
| H3K27me2  | 6.48     | 0.00     | 5.69     | 12.17   | 9.16     | 10.05    | 10.31    | 14.40  | 14.27   | 15.76   | 14.61   | 11.03    |
| H4K20me3  | 6.42     | 2.52     | 5.72     | 12.29   | 9.35     | 10.19    | 10.30    | 14.49  | 14.36   | 15.88   | 14.68   | 11.06    |
| H3K9me3   | 6.59     | 2.70     | 5.53     | 12.26   | 9.26     | 10.11    | 10.18    | 14.47  | 14.31   | 15.80   | 14.61   | 11.01    |
| H3K9me2   | 6.34     | 2.15     | 5.63     | 12.30   | 9.30     | 10.17    | 10.32    | 14.52  | 14.39   | 15.89   | 14.73   | 11.04    |
| H4K16Ac   | 6.39     | 2.35     | 5.45     | 12.24   | 9.23     | 10.07    | 10.24    | 14.45  | 14.33   | 15.81   | 14.66   | 10.94    |



| Variable  | H3K79me2 | H3K79me3 | H3K9Ac | H3K9me1 | H3K9me2 | H3K9me3 | H4K12Ac | H4K16Ac | H4K20me1 | H4K20me3 | H4K5Ac | H4K8Ac |
|-----------|----------|----------|--------|---------|---------|---------|---------|---------|----------|----------|--------|--------|
| AID       | 11.61    | 14.43    | 9.03   | 12.83   | 15.18   | 15.17   | 11.35   | 15.23   | 13.93    | 15.13    | 10.75  | 7.71   |
| H3K4me1   | 10.66    | 13.79    | 8.29   | 11.73   | 14.39   | 14.31   | 10.46   | 14.33   | 13.50    | 14.36    | 9.83   | 7.06   |
| H2BK120Ac | 10.53    | 14.22    | 6.01   | 13.13   | 15.22   | 15.14   | 10.58   | 15.15   | 14.79    | 15.18    | 8.93   | 5.74   |
| H4K8Ac    | 9.76     | 13.23    | 5.89   | 12.23   | 14.18   | 14.13   | 9.39    | 14.11   | 13.69    | 14.17    | 8.00   | 0.00   |
| H3K4me2   | 11.06    | 14.83    | 5.49   | 13.85   | 15.89   | 15.80   | 11.21   | 15.81   | 15.36    | 15.88    | 9.62   | 6.38   |
| H2BK20Ac  | 10.25    | 13.44    | 7.51   | 12.22   | 14.22   | 14.13   | 10.09   | 14.15   | 13.87    | 14.19    | 8.67   | 6.63   |
| H2B K5Ac  | 10.20    | 14.16    | 5.49   | 12.97   | 15.23   | 15.18   | 10.03   | 15.17   | 14.53    | 15.21    | 8.67   | 5.41   |
| H3K4me3   | 10.02    | 13.60    | 5.12   | 13.04   | 14.73   | 14.61   | 10.19   | 14.66   | 14.38    | 14.68    | 8.60   | 6.15   |
| H3K27Ac   | 9.17     | 12.90    | 4.94   | 12.14   | 13.95   | 13.92   | 9.15    | 13.88   | 13.54    | 13.94    | 7.68   | 5.31   |
| H3K4Ac    | 9.74     | 13.43    | 4.54   | 12.86   | 14.52   | 14.47   | 9.70    | 14.45   | 14.45    | 14.49    | 7.64   | 5.34   |
| H2B K12Ac | 9.71     | 12.87    | 6.72   | 12.05   | 13.69   | 13.64   | 9.58    | 13.63   | 13.68    | 13.67    | 7.72   | 6.32   |
| H4K91Ac   | 9.22     | 12.59    | 5.41   | 12.27   | 13.56   | 13.56   | 9.15    | 13.50   | 13.68    | 13.55    | 6.96   | 5.52   |
| H3K18Ac   | 9.39     | 12.57    | 6.99   | 11.69   | 13.44   | 13.36   | 9.30    | 13.38   | 13.34    | 13.41    | 7.55   | 6.47   |
| H3K9Ac    | 9.85     | 13.70    | 0.00   | 13.36   | 14.91   | 14.84   | 9.92    | 14.82   | 14.70    | 14.89    | 8.06   | 5.89   |
| Pol II    | 10.04    | 13.32    | 7.47   | 13.17   | 14.54   | 14.46   | 10.01   | 14.45   | 13.76    | 14.52    | 9.57   | 7.98   |
| H3K36Ac   | 9.12     | 11.66    | 8.00   | 11.17   | 12.30   | 12.26   | 8.59    | 12.24   | 12.60    | 12.29    | 6.56   | 7.43   |
| H2AK9Ac   | 8.21     | 11.27    | 6.49   | 11.68   | 12.35   | 12.34   | 8.08    | 12.28   | 12.64    | 12.33    | 6.19   | 7.10   |
| H4K5Ac    | 8.53     | 10.55    | 8.06   | 10.95   | 11.27   | 11.29   | 7.63    | 11.25   | 11.95    | 11.26    | 0.00   | 8.00   |
| H3K79me1  | 7.81     | 10.22    | 9.70   | 9.92    | 11.04   | 11.01   | 8.61    | 10.94   | 10.49    | 11.06    | 9.18   | 9.45   |
| CTCF      | 11.21    | 11.43    | 11.56  | 12.53   | 12.07   | 12.01   | 11.10   | 11.96   | 11.96    | 12.06    | 11.16  | 11.25  |
| H4K12Ac   | 8.22     | 9.75     | 9.92   | 10.12   | 10.46   | 10.48   | 0.00    | 10.40   | 10.57    | 10.45    | 7.63   | 9.39   |
| H3K79me2  | 0.00     | 9.16     | 9.85   | 10.05   | 10.32   | 10.36   | 8.22    | 10.25   | 10.41    | 10.33    | 8.53   | 9.76   |
| H3K36me2  | 9.64     | 10.39    | 11.24  | 9.14    | 10.17   | 10.11   | 9.61    | 10.07   | 10.67    | 10.19    | 9.11   | 10.16  |
| p300      | 8.92     | 9.86     | 9.72   | 11.31   | 10.75   | 10.71   | 9.15    | 10.63   | 11.25    | 10.72    | 8.75   | 9.97   |
| H3K36me3  | 10.11    | 9.84     | 13.04  | 9.12    | 10.32   | 10.18   | 10.16   | 10.24   | 9.08     | 10.30    | 11.67  | 12.01  |
| H3K36me1  | 10.89    | 9.86     | 12.91  | 8.97    | 9.30    | 9.26    | 10.93   | 9.23    | 9.34     | 9.35     | 11.19  | 12.05  |
| H3K9me1   | 10.05    | 9.03     | 13.36  | 0.00    | 8.30    | 8.31    | 10.12   | 8.23    | 7.89     | 8.38     | 10.95  | 12.23  |
| H3K23Ac   | 8.47     | 8.52     | 11.02  | 10.01   | 9.20    | 9.19    | 8.68    | 9.08    | 9.84     | 9.27     | 8.95   | 10.96  |
| H3K14Ac   | 8.88     | 7.86     | 11.76  | 9.32    | 7.95    | 7.98    | 8.42    | 7.86    | 9.22     | 8.01     | 8.39   | 11.34  |
| H3K27me1  | 10.37    | 7.65     | 14.38  | 7.58    | 6.34    | 6.59    | 10.26   | 6.39    | 6.74     | 6.42     | 11.47  | 13.38  |
| H4K20me1  | 10.41    | 7.24     | 14.70  | 7.89    | 6.11    | 6.22    | 10.57   | 6.07    | 0.00     | 6.22     | 11.95  | 13.69  |
| H3K79me3  | 9.16     | 0.00     | 13.70  | 9.03    | 5.12    | 5.28    | 9.75    | 5.04    | 7.24     | 5.18     | 10.55  | 13.23  |
| H3K27me3  | 11.37    | 7.23     | 15.02  | 9.37    | 5.63    | 5.53    | 11.46   | 5.45    | 7.54     | 5.72     | 12.19  | 14.40  |
| H2BK5me1  | 10.05    | 6.17     | 14.41  | 7.66    | 4.28    | 4.33    | 10.37   | 4.13    | 6.31     | 4.46     | 11.23  | 13.66  |
| H2A.Z     | 10.18    | 5.69     | 14.27  | 8.74    | 3.86    | 4.15    | 10.23   | 3.77    | 6.87     | 4.00     | 11.00  | 13.69  |
| H3K27me2  | 10.29    | 5.33     | 14.79  | 8.22    | 2.15    | 2.70    | 10.43   | 2.35    | 6.25     | 2.52     | 11.18  | 14.04  |
| H4K20me3  | 10.33    | 5.18     | 14.89  | 8.38    | 1.77    | 2.18    | 10.45   | 2.18    | 6.22     | 0.00     | 11.26  | 14.17  |
| H3K9me3   | 10.36    | 5.28     | 14.84  | 8.31    | 2.30    | 0.00    | 10.48   | 2.23    | 6.22     | 2.18     | 11.29  | 14.13  |
| H3K9me2   | 10.32    | 5.12     | 14.91  | 8.30    | 0.00    | 2.30    | 10.46   | 1.72    | 6.11     | 1.77     | 11.27  | 14.18  |
| H4K16Ac   | 10.25    | 5.04     | 14.82  | 8.23    | 1.72    | 2.23    | 10.40   | 0.00    | 6.07     | 2.18     | 11.25  | 14.11  |

| Variable  | H4K91Ac | Pol II | CTCF  | p300  |
|-----------|---------|--------|-------|-------|
| AID       | 8.70    | 9.49   | 11.11 | 11.78 |
| H3K4me1   | 7.91    | 10.06  | 11.56 | 11.18 |
| H2BK120Ac | 5.67    | 8.98   | 11.66 | 10.58 |
| H4K8Ac    | 5.52    | 7.98   | 11.25 | 9.97  |
| H3K4me2   | 6.70    | 8.90   | 11.83 | 10.95 |
| H2BK20Ac  | 6.43    | 9.88   | 11.45 | 10.38 |
| H2B K5Ac  | 5.98    | 7.28   | 11.96 | 10.35 |
| H3K4me3   | 6.00    | 8.37   | 11.36 | 10.08 |
| H3K27Ac   | 5.15    | 7.34   | 11.38 | 9.56  |
| H3K4Ac    | 4.35    | 8.20   | 11.63 | 9.65  |
| H2B K12Ac | 5.42    | 9.42   | 11.41 | 9.79  |
| H4K91Ac   | 0.00    | 8.51   | 11.31 | 9.30  |
| H3K18Ac   | 5.91    | 9.39   | 11.52 | 9.65  |
| H3K9Ac    | 5.41    | 7.47   | 11.56 | 9.72  |
| Pol II    | 8.51    | 0.00   | 11.60 | 9.84  |
| H3K36Ac   | 6.37    | 10.03  | 11.51 | 9.35  |
| H2AK9Ac   | 5.85    | 8.23   | 10.96 | 8.28  |
| H4K5Ac    | 6.96    | 9.57   | 11.16 | 8.75  |
| H3K79me1  | 9.43    | 9.26   | 11.08 | 9.44  |
| CTCF      | 11.31   | 11.60  | 0.00  | 10.46 |
| H4K12Ac   | 9.15    | 10.01  | 11.10 | 9.15  |
| H3K79me2  | 9.22    | 10.04  | 11.21 | 8.92  |
| H3K36me2  | 9.77    | 12.50  | 12.06 | 10.42 |
| p300      | 9.30    | 9.84   | 10.46 | 0.00  |
| H3K36me3  | 12.61   | 11.24  | 11.93 | 11.33 |
| H3K36me1  | 11.99   | 13.50  | 11.69 | 11.37 |
| H3K9me1   | 12.27   | 13.17  | 12.53 | 11.31 |
| H3K23Ac   | 10.44   | 11.09  | 11.27 | 9.24  |
| H3K14Ac   | 10.63   | 12.09  | 11.53 | 9.43  |
| H3K27me1  | 13.23   | 13.72  | 12.05 | 11.37 |
| H4K20me1  | 13.68   | 13.76  | 11.96 | 11.25 |
| H3K79me3  | 12.59   | 13.32  | 11.43 | 9.86  |
| H3K27me3  | 14.01   | 14.88  | 11.85 | 11.37 |
| H2BK5me1  | 13.27   | 14.04  | 12.01 | 10.80 |
| H2A.Z     | 13.11   | 13.99  | 11.68 | 10.40 |
| H3K27me2  | 13.47   | 14.47  | 12.04 | 10.74 |
| H4K20me3  | 13.55   | 14.52  | 12.06 | 10.72 |
| H3K9me3   | 13.56   | 14.46  | 12.01 | 10.71 |
| H3K9me2   | 13.56   | 14.54  | 12.07 | 10.75 |
| H4K16Ac   | 13.50   | 14.45  | 11.96 | 10.63 |

**Table S4:** Mutation analysis at promoter areas from 4 AID target genes

Each promoter sequence was analyzed both in *IgκAID-Ung*<sup>-/-</sup> and *Aicda*<sup>-/-</sup> control

bp: total number of bp sequenced

Mutations: total number of mutations detected

P value was calculated between the mutation frequency obtained in *IgκAID-Ung*<sup>-/-</sup> and *Aicda*<sup>-/-</sup> control

| Promoter area       | Strain                                                   | bp     | Mutations | Transitions at C-G (%) | RGYW-WRCY hotspot (% total mutations) | <i>IgκAID-Ung</i> <sup>-/-</sup> Mutation rate (x 10 <sup>-5</sup> ) | <i>Aicda</i> <sup>-/-</sup> Mutation rate (x 10 <sup>-5</sup> ) | P value           |
|---------------------|----------------------------------------------------------|--------|-----------|------------------------|---------------------------------------|----------------------------------------------------------------------|-----------------------------------------------------------------|-------------------|
| <b><i>Il4ra</i></b> | <i>IgκAID-Ung</i> <sup>-/-</sup>                         | 36359  | 2         | 100                    | 0                                     | <b>5.50</b>                                                          |                                                                 |                   |
|                     | <i>Aicda</i> <sup>-/-</sup>                              | 19548  | 1         | 0                      | 0                                     |                                                                      | <b>5.12</b>                                                     | <b>0.585</b>      |
| <b><i>Pax5</i></b>  | <i>IgκAID-Ung</i> <sup>-/-</sup>                         | 417885 | 112       | 88.7                   | 68                                    | <b>27.0</b>                                                          |                                                                 |                   |
|                     | <i>Aicda</i> <sup>-/-</sup>                              | 74636  | 4         | 25                     | 0                                     |                                                                      | <b>5.36</b>                                                     | <b>0.0007</b>     |
| <b><i>Pax5</i></b>  | <i>Ung</i> <sup>-/-</sup> <i>Msh2</i> <sup>-/-</sup> PPs | 35826  | 11        | 40.9                   | 27.3                                  | <b>30.7</b>                                                          |                                                                 |                   |
|                     | <i>IgκAID-Ung</i> <sup>-/-</sup>                         | 106877 | 18        | 58.3                   | 41.7                                  | <b>16.8</b>                                                          |                                                                 |                   |
| <b><i>Myc</i></b>   | <i>Aicda</i> <sup>-/-</sup>                              | 53873  | 2         | 100                    | 50                                    |                                                                      | <b>3.71</b>                                                     | <b>0.0465</b>     |
|                     | <i>IgκAID-Ung</i> <sup>-/-</sup>                         | 28640  | 1         | 0                      | 0                                     | <b>3.49</b>                                                          |                                                                 |                   |
| <b><i>Grap</i></b>  | <i>Aicda</i> <sup>-/-</sup>                              | 28131  | 1         | 0                      | 0                                     |                                                                      | <b>3.55</b>                                                     | <b>0.4874</b>     |
|                     | <i>IgκAID-Ung</i> <sup>-/-</sup>                         | 32324  | 25        | 68                     | 64                                    | <b>77.4</b>                                                          |                                                                 |                   |
| <b><i>Pim1</i></b>  | <i>Aicda</i> <sup>-/-</sup>                              | 27690  | 1         | 100                    | 0                                     |                                                                      | <b>3.61</b>                                                     | <b>&lt;0.0001</b> |
|                     | <i>IgκAID-Ung</i> <sup>-/-</sup>                         | 33636  | 13        | 92.3                   | 30.8                                  | <b>38.6</b>                                                          |                                                                 |                   |
| <b><i>Igγ1</i></b>  | <i>IgκAID-Ung</i> <sup>-/-</sup>                         | 64857  | 1         | 0                      | 0                                     |                                                                      | <b>1.54</b>                                                     | <b>&lt;0.0001</b> |
|                     | <i>Aicda</i> <sup>-/-</sup>                              | 64857  | 1         | 0                      | 0                                     |                                                                      | <b>1.54</b>                                                     | <b>&lt;0.0001</b> |

**Table S5:** Summary of anti-RPA ChIP-Seq runs

| Antibody     | Genotype                                                                         | Culture Conditions | Tags passing Quality Filter | Islands |
|--------------|----------------------------------------------------------------------------------|--------------------|-----------------------------|---------|
| $\alpha$ RPA | <i>Aicda</i> <sup>+/+</sup>                                                      | LPS+IL-4           | 25,471,018                  | 232     |
| $\alpha$ RPA | <i>Aicda</i> <sup>+/+</sup>                                                      | LPS+IL-4           | 27,381,347                  | 131     |
| $\alpha$ RPA | <i>Aicda</i> <sup>+/+</sup>                                                      | LPS+IL-4           | 31,418,448                  | 162     |
| $\alpha$ RPA | <i>Ig<math>\kappa</math>AID</i>                                                  | LPS+IL-4           | 15,539,556                  | 184     |
| $\alpha$ RPA | <i>Ig<math>\kappa</math>AID</i>                                                  | LPS+IL-4           | 16,789,847                  | 190     |
| $\alpha$ RPA | AID S38A/S38A                                                                    | LPS+IL-4           | 26,047,966                  | 230     |
| $\alpha$ RPA | AID T140A/T140A                                                                  | LPS+IL-4           | 25,688,669                  | 219     |
| $\alpha$ RPA | <i>Aicda</i> <sup>+/+</sup> and <i>Ig<math>\kappa</math>AID</i> samples combined | LPS+IL-4           | 116,600,216                 | 349     |
| $\alpha$ RPA | <i>Aicda</i> <sup>-/-</sup>                                                      | LPS+IL-4           | 30,999,530                  | 269     |
| $\alpha$ RPA | <i>Aicda</i> <sup>-/-</sup>                                                      | LPS+IL-4           | 17,227,505                  | 170     |



**Table S6:** Enrichment of RPA at on- and off-target sites

A *P* value was calculated to determine the significance of enrichment of RPA at the IgH and a subset of off-target AID sites

This was done by comparing the total number of sequence tags at each site relative to a random background model based on a binomial distribution

The probability that any one RPA read falls onto a region *i* by chance is

$$p = \frac{l_i}{l_{eg}}$$

where *l<sub>i</sub>* is the length region *i* and *l<sub>eg</sub>* is the effective size of the genome adjusted for mappability (2,123,929,214 bps).

Given that there are *n* total aligned reads (which can be considered trials in a binomial experiment), we can then determine the probability that *x* or more fall onto region *i*:

$$P(X > x) = 1 - P(X \leq x) = 1 - \sum_{i=0}^x \binom{n}{i} p^i (1-p)^{n-i}$$

The results (including a 99% confidence interval for the fold-enrichment (fE)) shown below demonstrate that with the exception of the Ig loci other genomic sites do not display statistically significant RPA recruitment.

| Gene            | P binomial | fE    | Signature |
|-----------------|------------|-------|-----------|
| <i>IgH</i>      | 0.00E+00   | 11.51 | TRUE      |
| <i>IgY1</i>     | 0.00E+00   | 8.12  | TRUE      |
| <i>IgE</i>      | 4.57E-72   | 3.54  | FALSE     |
| <i>Hist1h1c</i> | 3.82E-25   | 2.41  | FALSE     |
| <i>Pim1</i>     | 2.99E-27   | 2.06  | FALSE     |
| <i>Cd83</i>     | 1.99E-58   | 1.88  | FALSE     |
| <i>Il4ra</i>    | 3.57E-62   | 1.74  | FALSE     |
| <i>Myc</i>      | 4.95E-07   | 1.44  | FALSE     |
| <i>Grp</i>      | 8.69E-01   | 0.99  | FALSE     |
| <i>Pax5</i>     | 4.56E-01   | 0.99  | FALSE     |

**Table S7:** Antibodies used for ChIP-Seq

| Epitope    | Antibody   | Company/Provider     |
|------------|------------|----------------------|
| AID        | Ab1        | Y. Chaudhuri, F. Alt |
| AID        | Ab2 (H-80) | Santa Cruz           |
| RPA-32     | NA19L      | Oncogene             |
| PolII      | ab5408     | Abcam                |
| p300(C-20) | sc-585X    | Santa Cruz           |
| CTCF       | 07-729     | Upstate              |
| H2AK9Ac    | 07-289     | Upstate              |
| H2BK5Ac    | ab1764     | Abcam                |
| H2BK5me1   | ab12929    | Abcam                |
| H2BK12Ac   | ab40883    | Abcam                |
| H2BK20Ac   | 07-347     | Upstate              |
| H2BK120Ac  | 07-564     | Upstate              |
| H3K4me1    | ab8895     | Abcam                |
| H3K4me2    | ab7766     | Abcam                |
| H3K4me3    | ab8580     | Abcam                |
| H3K9Ac     | ab4441     | Abcam                |
| H3K9me1    | ab8896     | Abcam                |
| H3K9me2    | ab1220     | Abcam                |
| H3K9me3    | ab8898     | Abcam                |
| H3K4Ac     | 07-539     | Upstate              |
| H3K14Ac    | 07-353     | Upstate              |
| H3K18Ac    | ab1191     | Abcam                |
| H3K23Ac    | 07-355     | Upstate              |
| H3K27Ac    | ab4729     | Abcam                |
| H3K27me1   | 07-448     | Upstate              |
| H3K27me2   | ab24684    | Abcam                |
| H3K27me3   | 17-622     | Upstate              |
| H3K36Ac    | 07-540     | Upstate              |
| H3K36me1   | ab9048     | Abcam                |
| H3K36me2   | 07-369     | Upstate              |
| H3K36me3   | ab9050     | Abcam                |
| H3K79me1   | ab2886     | Abcam                |
| H3K79me2   | ab24684    | Abcam                |
| H3K79me3   | ab2621     | Abcam                |
| H4K5Ac     | 07-327     | Upstate              |
| H4K8Ac     | 07-328     | Upstate              |
| H4K12Ac    | 07-595     | Upstate              |
| H4K16Ac    | sc-8662R   | Santa Cruz           |
| H4K91Ac    | ab4627     | Abcam                |
| H4K20me1   | ab9051     | Abcam                |
| H3K20me3   | ab9053     | Abcam                |
| H2A.Z      | ab4174     | Abcam                |

**Table S8:** Primers and PCR conditions used to determine SHM in *Aicda*<sup>-/-</sup> and *IgkAID-Ung*<sup>-/-</sup> B cells  
 \*Annealing temperature was 60C for all reactions unless otherwise stated

| Amplicon            | 5' primer                                         | 3' primer                                       |
|---------------------|---------------------------------------------------|-------------------------------------------------|
| Myc_exon1*          | catgctgcgctattactgtttacac<br>cccagattcccaaagcagag | gaaagaacacagggaaagaccac<br>cagcctcaaacagctcgag  |
| Pim1                | ttcggctcggctactactcg                              | ggagggaaaagtgggtcatalac                         |
| Mir142              | gactagagacagaggcgtg<br>cgttggattcaagactgtgggtc    | caagtacaggggtcaggaag<br>aatgagggcggtgagagatgctc |
| Myc_intron1         | tggctttccctgtgtctttctg                            | gacacctcccttctacactctaaaccg                     |
| Il4ra               | gagcctgaactcgaggtag                               | ccctcagtcagagagcacag                            |
| Grap                | ctgtacagcttcaggctac                               | cagccaagccatggtcttc                             |
| Pax5_exon1a         | tcgaccatcaggacaggtag<br>caggaaaaggcctgtccttc      | cataccacccactgtgctc<br>tgcaactgcacagtgaag       |
| H1c                 | tgtccgagctcataccaag                               | agcatagaagccactacaag                            |
| Ly6e                | cttgggtgattcagcctttg                              | cctgaggaacacctccacaac                           |
| Cd83 (68C)          | cctgtttctaggctgcggtac                             | gaagaaggcagctcccgtgttt                          |
| H2afx               | gagttataaggccggcttg                               | gaggagggaaagagaaggtatg                          |
| Gadd45g             | catcggactctgggaatctttac                           | cagaagttcgtgagtgcttc                            |
| Il4i1               | ccaagagagctgaaggtagag                             | caggacgggtaagtggagtg                            |
| Adrbk1              | ccggagacccattattctg                               | ccacaagtgggaaaagggtaa                           |
| Hvcn1               | cgtaggcctttgagttgacg                              | aaggttgagcagagaggaac                            |
| Actb                | gtaacaggtcacttacctggtg                            | gcgtgcgctctctatcactg                            |
| Pax5_downstream2kb  | gagccagaggaacatcactg                              | gaggaaagaaggagacagtttg                          |
| Ucp2                | gccctttgttattgctctgac                             | caagtccttcagacagccttg                           |
| Pip5k1c             | ttcgccatggagctagag                                | atgctgctcttgacaaggaag                           |
| Coro1               | tctcctcctcctcactg                                 | cttctgctcagtaaaggaac                            |
| Dpagt1              | ggaaaacagcaccgctgac                               | ggttgctcctaagagctcttg                           |
| Trex1               | ctcctgctggagttgagatg                              | tctgtgagccatgctgaac                             |
| Syng2               | tccagcccgtgggtttg                                 | cgctaggctgggagattc                              |
| N-myc               | aaagcctattcagacccgaag                             | gtgtggctctctgcaactttg                           |
| Hmbs                | ttgctgctgccacaacagatc                             | caaactgtatgccagggtacaag                         |
| Rpl4                | catgtgctttagctcggag                               | aggcatatacagggcaatc                             |
| Eif3h               | tgaagcaggtgcagatcgac                              | aagaagaagacgacgacgatg                           |
| Gdi2                | gggaaaaccaggtatgtggaag                            | atggtcggttctcttccaac                            |
| Rbbp7               | tcttgactagcgagagagaag                             | acgctcctccacagtatcttc                           |
| Sfrs9               | ctggtgtcacttcttcaatc                              | ggcaaactgcaagacacttag                           |
| Cdc42               | cagttcctcgttcttagcag                              | gttaaccggggtacatag                              |
| Crk                 | ggactatgtgcttagcgtctc                             | accacctccacaaggggaag                            |
| Lman1               | cctccttgcttctgctc                                 | tgtttcagtcacagggcaatg                           |
| Fam50a              | gatgttggtgagactccttg                              | aatgtccagaccctggaattc                           |
| Il4ra-upstream      | acagcaagatgtggtggcttg                             | cgctggtgtccttatttac                             |
| H1c-upstream        | gccaaggctcctttatag                                | gcagtacgccgatagagtag                            |
| Pax5-upstream2kb    | ccgaaagctaacacaggtttc                             | gcaccggacatcgcaattc                             |
| Pax5-upstream1kb    | gctgaatgggacctagatac                              | gaaatggacagcgaggaaaag                           |
| Myc-upstream2kb     | ctcacttgatactgtgactc                              | cagtagcgtgtataaggtgctc                          |
| Myc-upstream1kb     | ctggaagaatgtgccagctc                              | gaaagaggaggaggagcctc                            |
| Pim1-upstream (65C) | aaatctccgggaaacacagag                             | gagtcggaggacgactgag                             |
| Grap-upstream       | gagaggagacggttgaag                                | accagcagctacagcttc                              |
| IgSu                | gtaaggaggaccaggctaaag                             | cagtcagtgtaggcagtaga                            |
| IgCu                | tcctcagagagctcagctcttc                            | cacggcaggtgtacacattc                            |
